# Supplementary material for: Genome-wide identification and characterization of long non-coding RNAs responsive toDickeya zeaein rice
Source: Royal Society of Chemistry journal article supplement (doi:10.1039/c8ra04993a), 2018-01-01
Supplement: c8ra04993a1.pdf [file c8ra04993a1.pdf]

# Fig. S1 The regulation mechanism to targets of three kinds of lncRNAs.

## Intronic lncRNAs

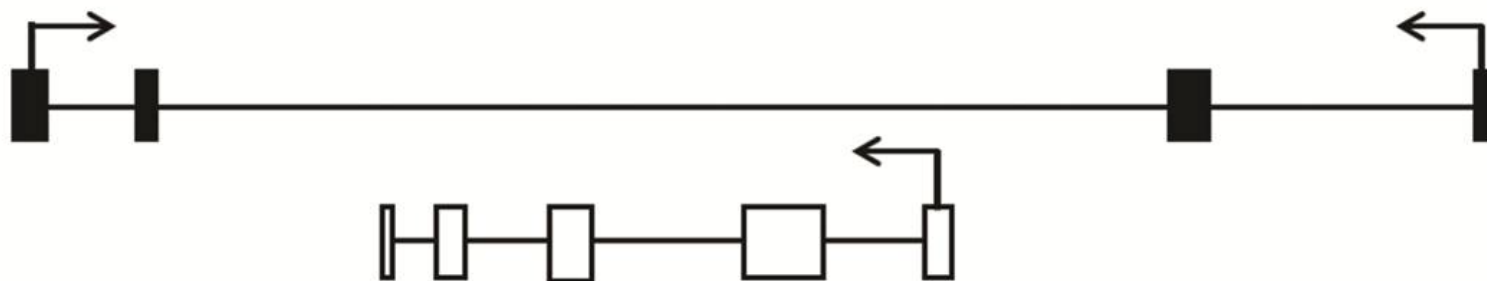

## LincRNAs

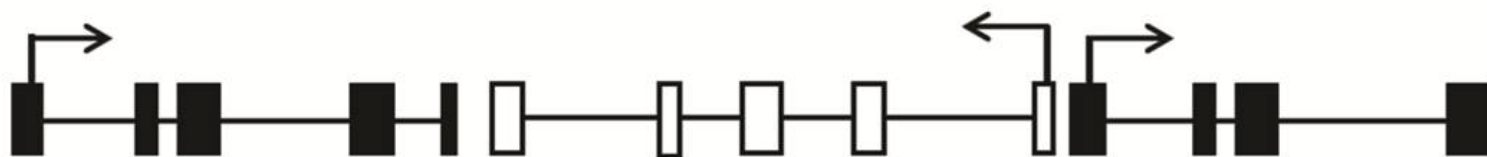

## Antisense lncRNAs

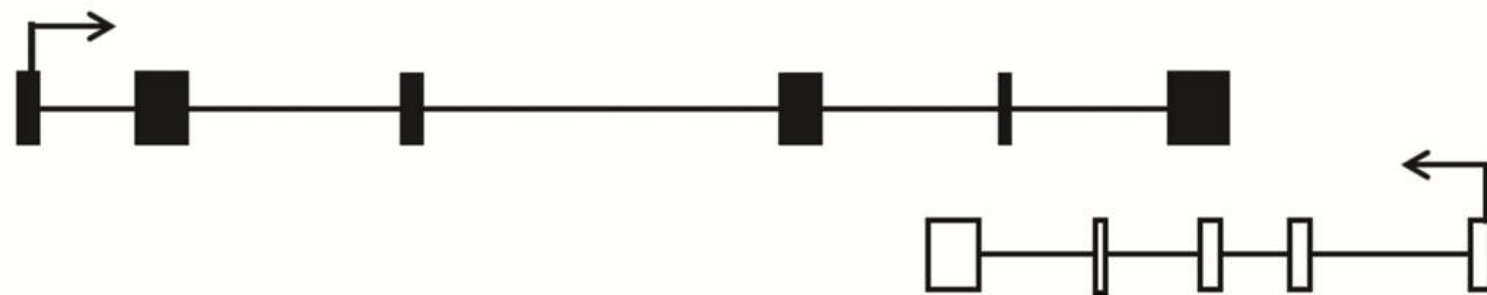

**Fig. S2 The scatter dot plots according to the p value of lncRNAs.**

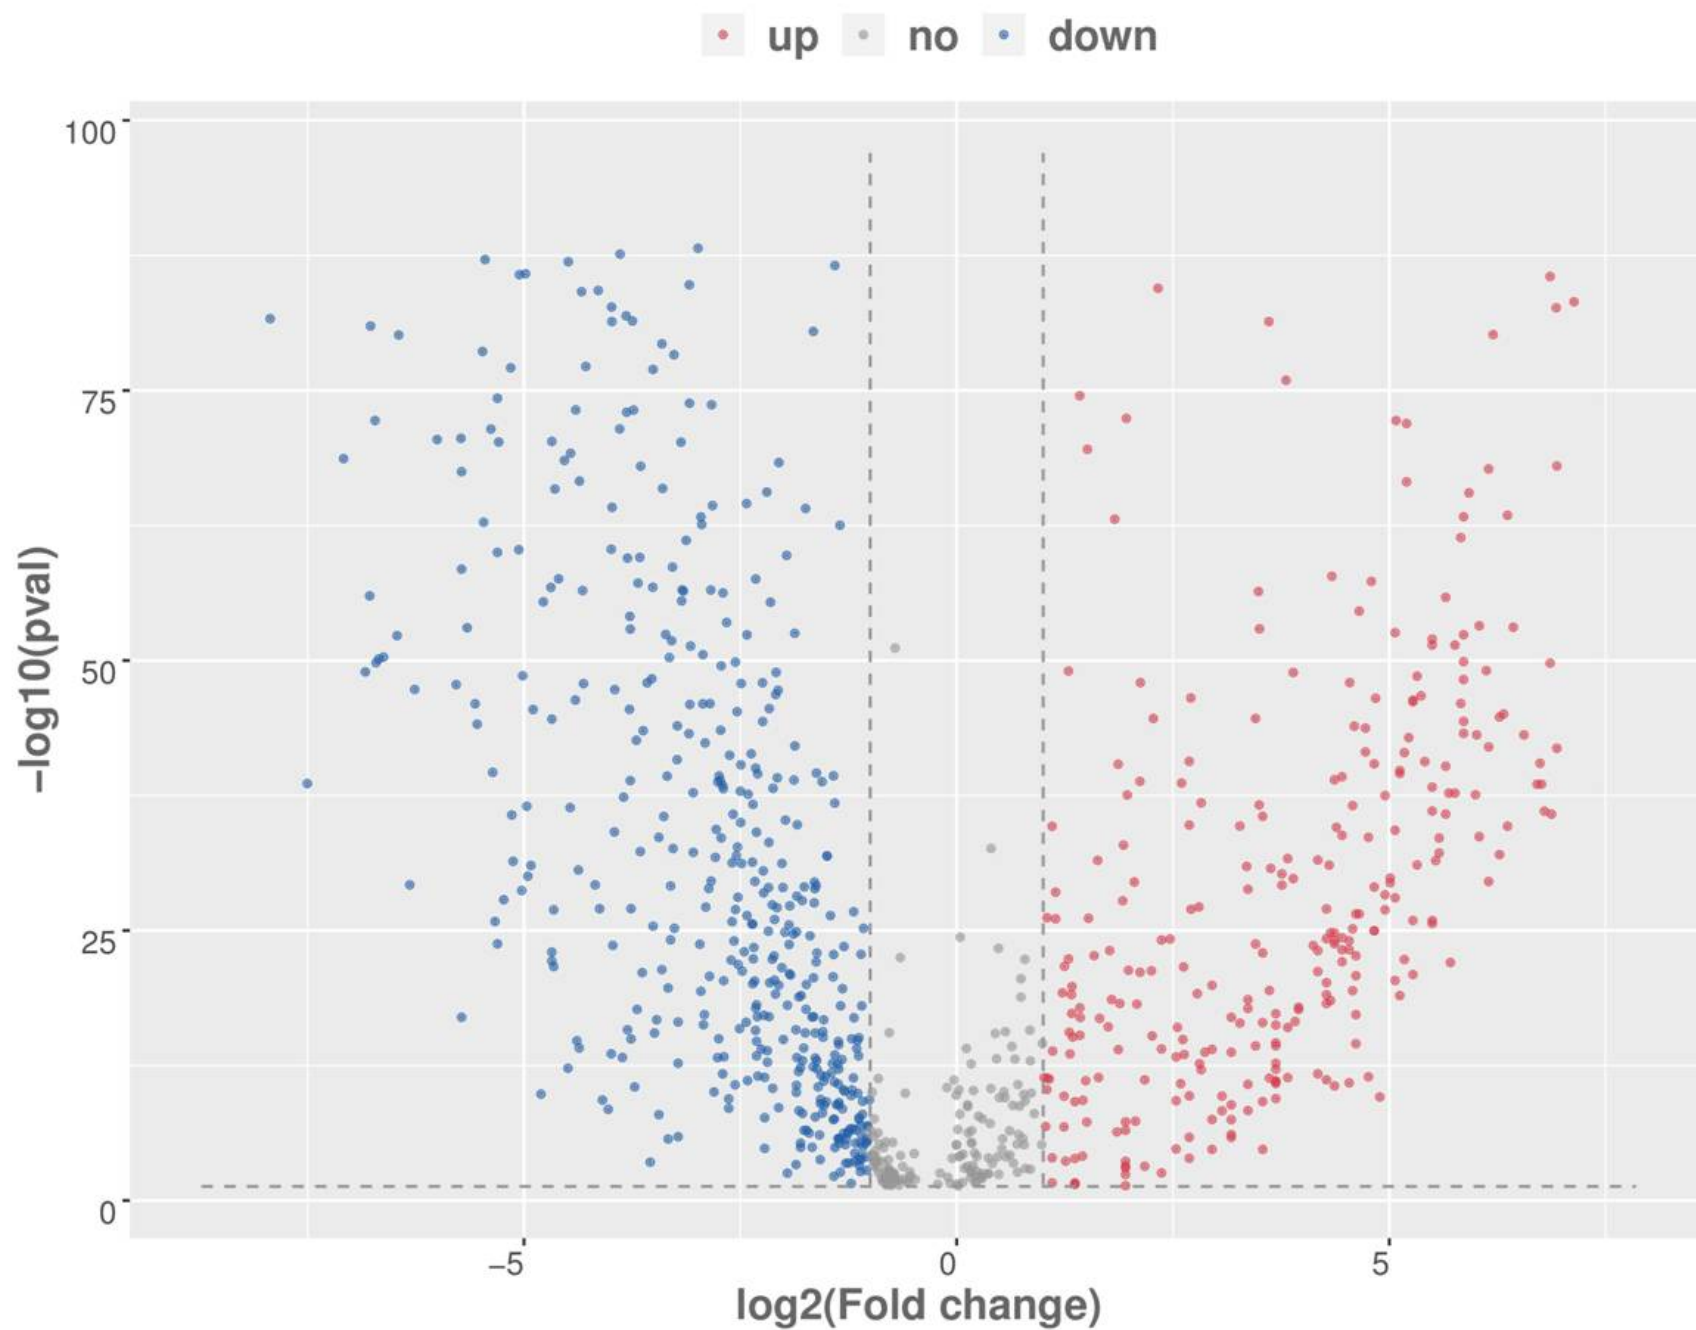

# Fig. S3 The predicted interaction networks of 13 lncRNAs-target pairs.

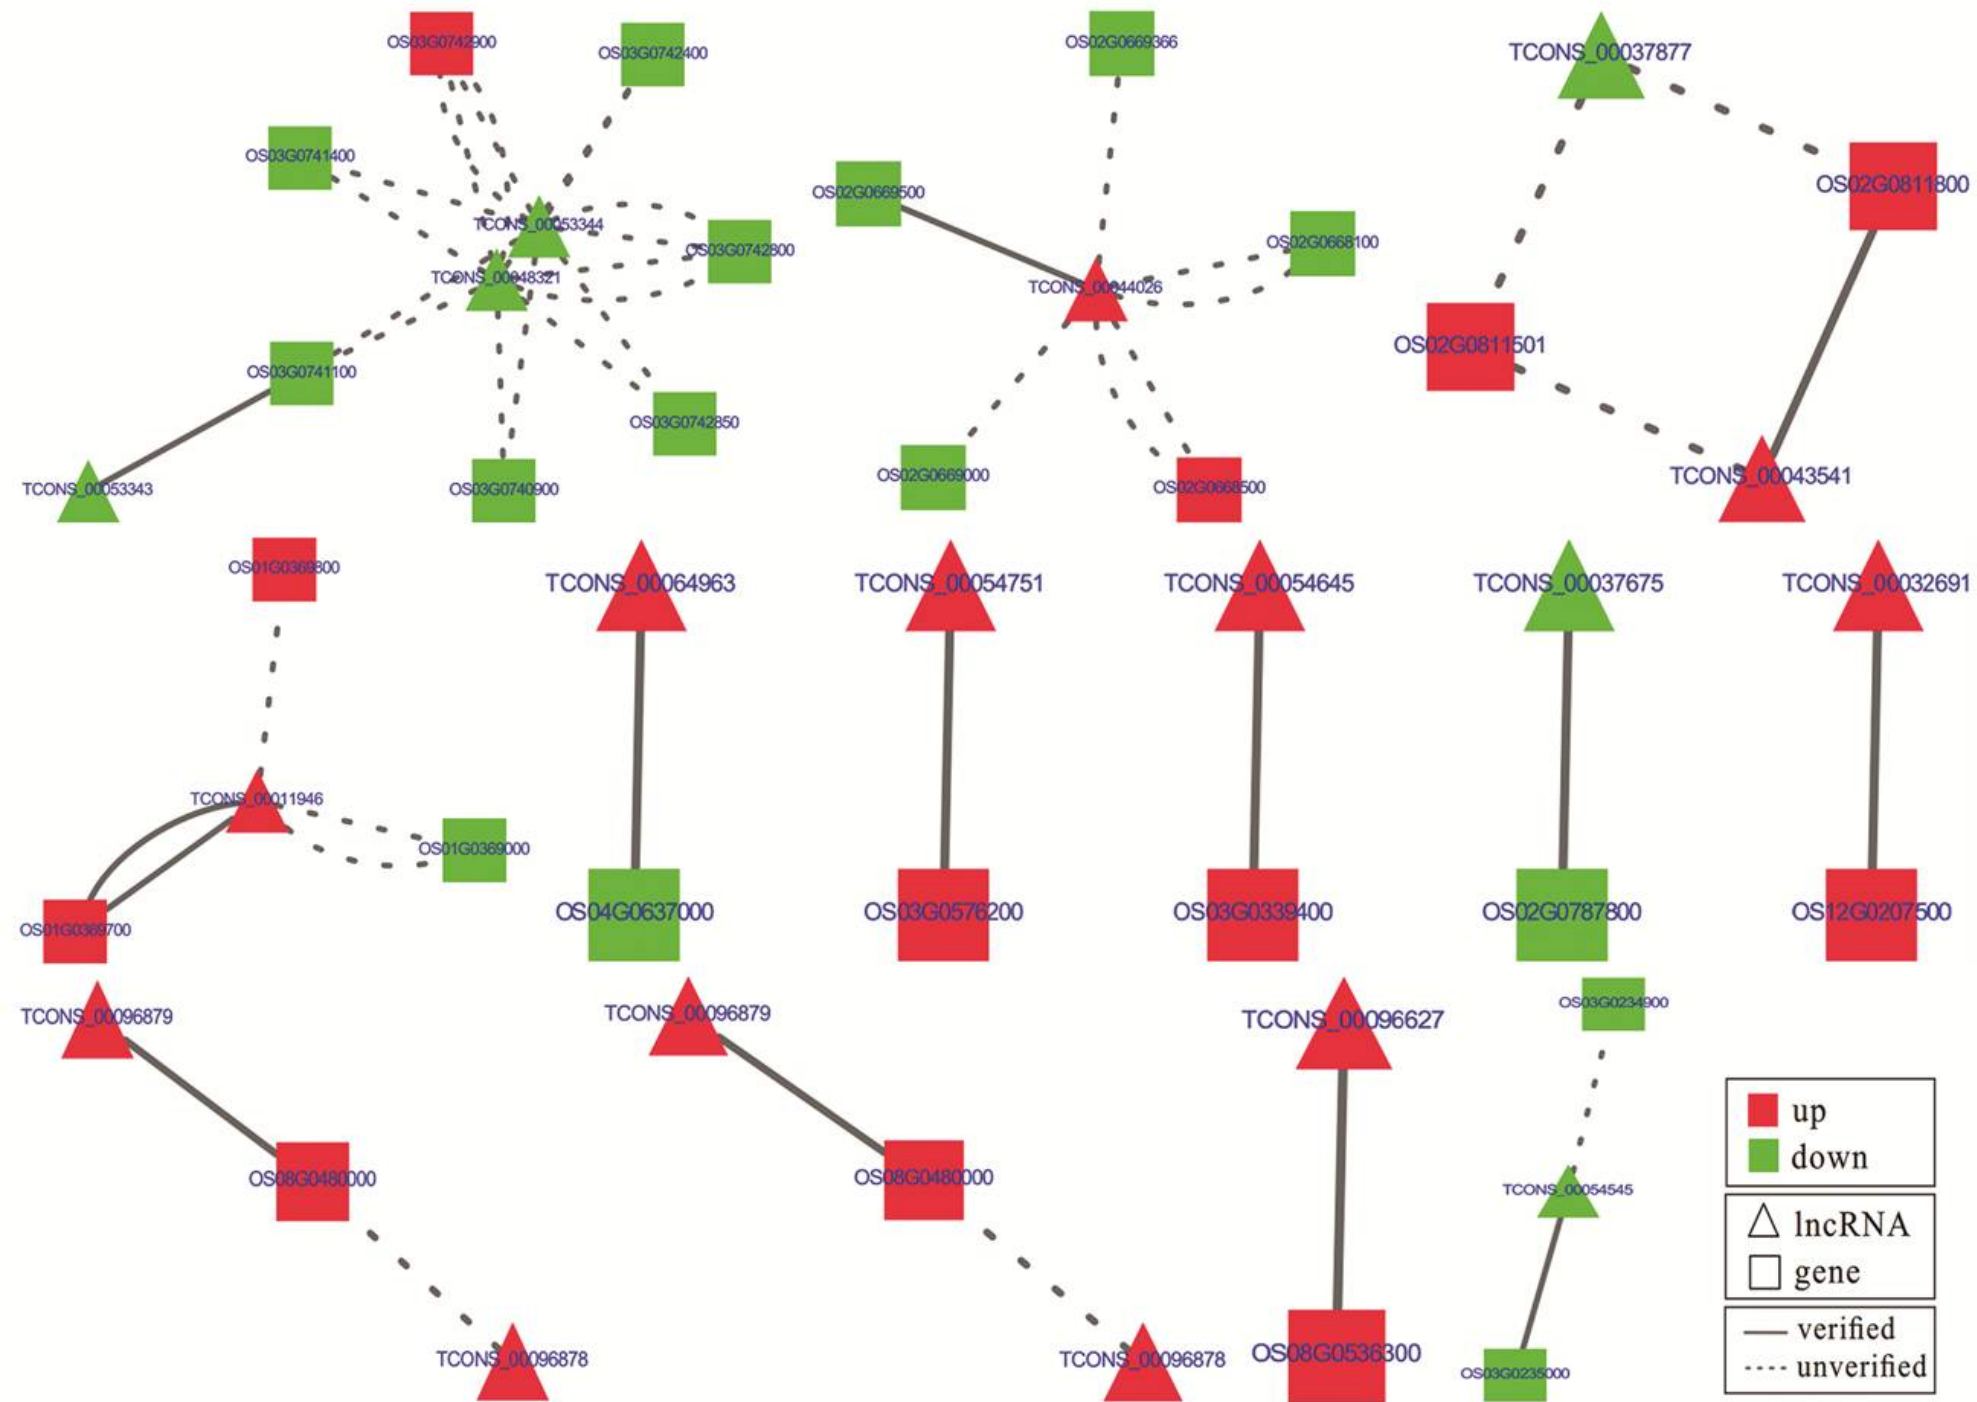

**Table S1 Primers used in this study for qRT-PCR analysis.**

| <b>LncRNAs/mRNAs</b> | <b>Primers</b>  | <b>Primer sequences</b>  |
|----------------------|-----------------|--------------------------|
| <b>LncRNAs</b>       |                 |                          |
| TCONS_00043825       | Forward (5'-3') | CCGAAGCCCAGTCCAAGA       |
|                      | Reverse (5'-3') | GCCGAACCGTGAATACCG       |
| TCONS_00032691       | Forward (5'-3') | TCAACCCATCTGTAGCAC       |
|                      | Reverse (5'-3') | GACACTGACGGTAAGCAA       |
| TCONS_00064597       | Forward (5'-3') | CTAATATCAGCAAACAGTCCCA   |
|                      | Reverse (5'-3') | TATCAACCTTTCGTGTTTCAGTCG |
| TCONS_00054751       | Forward (5'-3') | ACCTGTTTCGTCCCAGTGAGC    |
|                      | Reverse (5'-3') | ATTACAAACCGCACGCATAGA    |
| TCONS_00096627       | Forward (5'-3') | TATCTGAAGGGGCAAATACTCTGA |
|                      | Reverse (5'-3') | GACTGGGTAGCATTGTTTTAGGG  |
| TCONS_00054645       | Forward (5'-3') | AGACGAGGCCGTCGAGGTT      |
|                      | Reverse (5'-3') | GGCAATGGCATCGCTCACT      |
| TCONS_00054417       | Forward (5'-3') | GCATGAGATCACGACAGCTA     |
|                      | Reverse (5'-3') | TCAGCCCCCTCTGTGACTCT     |
| TCONS_00096879       | Forward (5'-3') | TGGTTTGCTAAGCCGAGTGAC    |
|                      | Reverse (5'-3') | GGATACCTGAATCCGCTGTGA    |
| TCONS_00081726       | Forward (5'-3') | AGGTGATTCCGTGATTGG       |
|                      | Reverse (5'-3') | TCTGCTTGCTCGTCCTCC       |
| TCONS_00064813       | Forward (5'-3') | TGTAACCTCAAGCCTCAC       |
|                      | Reverse (5'-3') | TATGTACTACCGATAACCT      |
| <b>mRNA targets</b>  |                 |                          |
| OS03g0339400         | Forward (5'-3') | GCGCCTGCACTTCCACGACTG    |
|                      | Reverse (5'-3') | AGCCGCGGACGGAGTTCATGT    |
| OS04g0470100         | Forward (5'-3') | ACAGGGGTGGGCAAGTCGTGC    |
|                      | Reverse (5'-3') | CCTGCCGTGTCCCAAATCTGG    |
| OS02g0318100         | Forward (5'-3') | GGCGTGGCGCCGACGAGGCT     |
|                      | Reverse (5'-3') | TTGACCGTCCACCTGGCAAC     |
| OS08g0480000         | Forward (5'-3') | TCCAGCGGATCGCGCTGTAC     |
|                      | Reverse (5'-3') | CCCAGCAGGAAACCGAAGTT     |
| OS03g0764600         | Forward (5'-3') | CTCGCCGACGTGATCGAGCT     |
|                      | Reverse (5'-3') | CGTCGCTGCCGCGGCTGTCC     |
| OS03g0741100         | Forward (5'-3') | CATGTCCGGGAACAGGCTGT     |
|                      | Reverse (5'-3') | CTGTCAGGCTGGTTCCTCTC     |
| OS04g0637000         | Forward (5'-3') | AGTCACGAGCAGTTCAAGGT     |
|                      | Reverse (5'-3') | GCTTGCCTCCTGATCAACAT     |
| OS02g0669500         | Forward (5'-3') | CAACCCAACGTCGCCGTGGA     |
|                      | Reverse (5'-3') | GCAGTGAGACTCTGGTGTTT     |

---

|                                |                 |                      |
|--------------------------------|-----------------|----------------------|
| OS06g0683400                   | Forward (5'-3') | CGAGGACTACCTGCCGGTGA |
|                                | Reverse (5'-3') | CTGTCGAAGGTGATGAGCCC |
| OS02g0787800                   | Forward (5'-3') | GTGACAATTGTGCGGAGACC |
|                                | Reverse (5'-3') | GATGATACCTGTGGGTGGAA |
| <i>EF1-<math>\alpha</math></i> | Forward (5'-3') | ACAAGCTTGGAGGTATCGAC |
|                                | Reverse (5'-3') | CGCTCGGCCTTGAGCTTGTC |

---

**Table S2 Summary of detected lncRNAs in this study.**

| Chr. | Transcript_id  | Gene_id     | Start   | End     | Strai | Exo | Gene_name    | Oid        | Nearest_re   | Clas | Tss_id | p-value   |
|------|----------------|-------------|---------|---------|-------|-----|--------------|------------|--------------|------|--------|-----------|
| chr1 | TCONS_00011729 | XLOC_000058 | 377957  | 378340  | +     | 1   | DXR          | CUFF.32.1  | OS01T01069(i |      | TSS64  | 4.53E-16  |
| chr1 | TCONS_00011731 | XLOC_000079 | 518620  | 519221  | +     | 1   | OS01G0109700 | CUFF.50.1  | OS01T01097(i |      | TSS86  | 5.592E-20 |
| chr1 | TCONS_00011733 | XLOC_000097 | 649648  | 650224  | +     | 1   | OS01G0112500 | CUFF.40.1  | OS01T01125(i |      | TSS104 | 4.275E-06 |
| chr1 | TCONS_00011734 | XLOC_000119 | 788618  | 788945  | +     | 1   | OS01G0114600 | CUFF.38.1  | OS01T01146(x |      | TSS131 | 4.127E-14 |
| chr1 | TCONS_00011748 | XLOC_000213 | 1363482 | 1363764 | +     | 1   | OS01G0124600 | CUFF.64.1  | OS01T01246(x |      | TSS229 | 2.514E-28 |
| chr1 | TCONS_00000261 | XLOC_000253 | 1676096 | 1676360 | +     | 1   | MTP7         | CUFF.63.1  | OS01T01300(i |      | TSS271 | 1.199E-06 |
| chr1 | TCONS_00011752 | XLOC_000288 | 1960102 | 1960380 | +     | 1   | OS01G0136400 | CUFF.97.1  | OS01T01364(i |      | TSS308 | 1.739E-22 |
| chr1 | TCONS_00000351 | XLOC_000337 | 2257505 | 2257712 | +     | 1   | NA           | CUFF.77.1  | NA           | u    | TSS360 | 0         |
| chr1 | TCONS_00011759 | XLOC_000352 | 2352133 | 2352465 | +     | 1   | OS01G0143100 | CUFF.108.1 | OS01T01431(i |      | TSS377 | 4.127E-14 |
| chr1 | TCONS_00000483 | XLOC_000469 | 3104531 | 3104857 | +     | 1   | OS01G0159300 | CUFF.146.1 | OS01T01593(i |      | TSS501 | 0.014741  |
| chr1 | TCONS_00000541 | XLOC_000523 | 3483157 | 3483472 | +     | 1   | OS01G0168100 | CUFF.124.1 | OS01T01681(i |      | TSS556 | 5.289E-42 |
| chr1 | TCONS_00011773 | XLOC_000525 | 3488605 | 3489041 | +     | 1   | NA           | CUFF.154.1 | NA           | u    | TSS558 | 7.048E-34 |
| chr1 | TCONS_00011777 | XLOC_000558 | 3721512 | 3721718 | +     | 1   | OS01G0172300 | CUFF.169.1 | OS01T01723(i |      | TSS591 | 5.01E-43  |
| chr1 | TCONS_00011789 | XLOC_000652 | 4460238 | 4460457 | +     | 1   | NA           | CUFF.214.1 | NA           | u    | TSS689 | 4.766E-28 |
| chr1 | TCONS_00011791 | XLOC_000656 | 4468640 | 4468846 | +     | 1   | NA           | CUFF.215.1 | NA           | u    | TSS693 | 2.638E-18 |
| chr1 | TCONS_00000666 | XLOC_000658 | 4471312 | 4471529 | +     | 1   | NA           | CUFF.169.1 | NA           | u    | TSS696 | 2.325E-27 |
| chr1 | TCONS_00000668 | XLOC_000661 | 4473757 | 4474181 | +     | 1   | NA           | CUFF.171.1 | NA           | u    | TSS699 | 8.942E-30 |
| chr1 | TCONS_00011796 | XLOC_000664 | 4481229 | 4481836 | +     | 1   | NA           | CUFF.222.1 | NA           | u    | TSS703 | 6.018E-07 |
| chr1 | TCONS_00000672 | XLOC_000665 | 4481920 | 4482441 | +     | 1   | NA           | CUFF.172.1 | NA           | u    | TSS705 | 2.074E-19 |
| chr1 | TCONS_00000697 | XLOC_000691 | 4625409 | 4625826 | +     | 1   | OS01G0186700 | CUFF.194.1 | OS01T01867(i |      | TSS733 | 1.233E-12 |
| chr1 | TCONS_00000698 | XLOC_000692 | 4628180 | 4628429 | +     | 1   | OS01G0186700 | CUFF.189.1 | OS01T01867(x |      | TSS734 | 0         |
| chr1 | TCONS_00011800 | XLOC_000693 | 4628815 | 4629022 | +     | 1   | OS01G0186700 | CUFF.245.1 | OS01T01867(i |      | TSS735 | 5.016E-18 |
| chr1 | TCONS_00011801 | XLOC_000703 | 4699220 | 4699424 | +     | 1   | NA           | CUFF.234.1 | NA           | u    | TSS748 | 5.418E-30 |
| chr1 | TCONS_00011802 | XLOC_000704 | 4699476 | 4699846 | +     | 1   | NA           | CUFF.235.1 | NA           | u    | TSS749 | 1.326E-28 |
| chr1 | TCONS_00011804 | XLOC_000706 | 4714276 | 4714584 | +     | 1   | NA           | CUFF.238.1 | NA           | u    | TSS751 | 7.869E-14 |
| chr1 | TCONS_00000714 | XLOC_000707 | 4717055 | 4717449 | +     | 1   | OS01G0187900 | CUFF.191.1 | OS01T01879(i |      | TSS752 | 9.09E-07  |
| chr1 | TCONS_00011808 | XLOC_000756 | 5213006 | 5213219 | +     | 1   | NA           | CUFF.263.1 | NA           | u    | TSS807 | 1.739E-22 |
| chr1 | TCONS_00011812 | XLOC_000768 | 5300397 | 5300607 | +     | 1   | NA           | CUFF.270.1 | NA           | u    | TSS819 | 2.02E-19  |
| chr1 | TCONS_00000782 | XLOC_000774 | 5334346 | 5334547 | +     | 1   | OS01G0198200 | CUFF.231.1 | OS01T01982(i |      | TSS825 | 0         |
| chr1 | TCONS_00000811 | XLOC_000804 | 5593228 | 5593496 | +     | 1   | OS01G0201900 | CUFF.234.1 | OS01T02019(i |      | TSS856 | 8.713E-12 |
| chr1 | TCONS_00000817 | XLOC_000811 | 5668788 | 5669012 | +     | 1   | NA           | CUFF.225.1 | NA           | u    | TSS863 | 6.356E-67 |
| chr1 | TCONS_00011820 | XLOC_000812 | 5669141 | 5669384 | +     | 1   | OS01G0203000 | CUFF.290.1 | OS01T02030(x |      | TSS864 | 0.0003675 |

|      |                |             |          |          |   |   |              |            |              |         |           |           |
|------|----------------|-------------|----------|----------|---|---|--------------|------------|--------------|---------|-----------|-----------|
| chr1 | TCONS_00011822 | XLOC_000820 | 5703711  | 5704129  | + | 1 | OS01G0203800 | CUFF.302.1 | OS01T02038(i | TSS872  | 0.022738  |           |
| chr1 | TCONS_00011823 | XLOC_000821 | 5704593  | 5704829  | + | 1 | OS01G0203800 | CUFF.304.1 | OS01T02038(i | TSS873  | 1.815E-17 |           |
| chr1 | TCONS_00011824 | XLOC_000822 | 5705919  | 5706565  | + | 1 | OS01G0203800 | CUFF.310.1 | OS01T02038(i | TSS874  | 6.57E-17  |           |
| chr1 | TCONS_00011827 | XLOC_000841 | 5838575  | 5838929  | + | 1 | OS01G0207400 | CUFF.294.1 | OS01T02074(x | TSS893  | 0.31969   |           |
| chr1 | TCONS_00000886 | XLOC_000885 | 6187799  | 6188014  | + | 1 | OS01G0213100 | CUFF.240.1 | OS01T02131(i | TSS937  | 1.336E-34 |           |
| chr1 | TCONS_00011832 | XLOC_000940 | 6574597  | 6574798  | + | 1 | NA           | CUFF.338.2 | NA           | u       | TSS997    | 3.129E-15 |
| chr1 | TCONS_00000958 | XLOC_000951 | 6624550  | 6624876  | + | 1 | NA           | CUFF.265.1 | NA           | u       | TSS1008   | 1.477E-05 |
| chr1 | TCONS_00000971 | XLOC_000967 | 6727123  | 6727325  | + | 1 | OS01G0223200 | CUFF.282.1 | OS01T02232(x | TSS1024 | 0         |           |
| chr1 | TCONS_00011837 | XLOC_000969 | 6739304  | 6739547  | + | 1 | NA           | CUFF.350.1 | NA           | u       | TSS1026   | 7.729E-23 |
| chr1 | TCONS_00011838 | XLOC_000970 | 6739820  | 6740026  | + | 1 | NA           | CUFF.349.1 | NA           | u       | TSS1027   | 0.005791  |
| chr1 | TCONS_00011840 | XLOC_000976 | 6761882  | 6762183  | + | 1 | NA           | CUFF.353.1 | NA           | u       | TSS1033   | 6.269E-37 |
| chr1 | TCONS_00000977 | XLOC_000978 | 6764262  | 6764468  | + | 1 | NA           | CUFF.273.1 | NA           | u       | TSS1035   | 3.908E-74 |
| chr1 | TCONS_00001023 | XLOC_001024 | 7088339  | 7088573  | + | 1 | OS01G0228300 | CUFF.291.1 | OS01T02283(i | TSS1085 | 7.708E-37 |           |
| chr1 | TCONS_00011851 | XLOC_001076 | 7442137  | 7442354  | + | 1 | OS01G0234800 | CUFF.399.1 | OS01T02348(i | TSS1140 | 3.301E-22 |           |
| chr1 | TCONS_00001110 | XLOC_001106 | 7624260  | 7624524  | + | 1 | OS01G0237750 | CUFF.310.1 | OS01T02377(x | TSS1171 | 0         |           |
| chr1 | TCONS_00011854 | XLOC_001107 | 7632478  | 7632689  | + | 1 | NA           | CUFF.401.1 | NA           | u       | TSS1172   | 9.541E-18 |
| chr1 | TCONS_00011855 | XLOC_001108 | 7639483  | 7639694  | + | 1 | NA           | CUFF.402.1 | NA           | u       | TSS1173   | 9.158E-23 |
| chr1 | TCONS_00011856 | XLOC_001122 | 7762059  | 7764092  | + | 1 | NCRNA_1281   | CUFF.427.1 | NCRNA_128    | x       | TSS1188   | 8.188E-64 |
| chr1 | TCONS_00011861 | XLOC_001173 | 8196933  | 8197133  | + | 1 | EXPA8        | CUFF.430.1 | OS01T02489(x | TSS1242 | 8.061E-36 |           |
| chr1 | TCONS_00001179 | XLOC_001178 | 8256109  | 8256346  | + | 1 | NA           | CUFF.323.1 | NA           | u       | TSS1247   | 3.855E-21 |
| chr1 | TCONS_00001197 | XLOC_001193 | 8357330  | 8357600  | + | 1 | NA           | CUFF.329.1 | NA           | u       | TSS1265   | 4.743E-05 |
| chr1 | TCONS_00001199 | XLOC_001195 | 8373491  | 8373712  | + | 1 | OS01G0253100 | CUFF.331.1 | OS01T02531(i | TSS1268 | 1.444E-33 |           |
| chr1 | TCONS_00011864 | XLOC_001200 | 8398154  | 8398404  | + | 1 | RPA3         | CUFF.439.1 | OS01T02536(i | TSS1273 | 5.076E-11 |           |
| chr1 | TCONS_00001214 | XLOC_001208 | 8445516  | 8445719  | + | 1 | OS01G0254200 | CUFF.334.1 | OS01T02542(i | TSS1281 | 0         |           |
| chr1 | TCONS_00001231 | XLOC_001225 | 8593415  | 8593840  | + | 1 | OS01G0257400 | CUFF.343.1 | OS01T02574(x | TSS1298 | 0         |           |
| chr1 | TCONS_00011867 | XLOC_001250 | 8793891  | 8794142  | + | 1 | NAC74        | CUFF.483.1 | OS01T02612(i | TSS1324 | 4.203E-26 |           |
| chr1 | TCONS_00011868 | XLOC_001256 | 8890034  | 8890340  | + | 1 | OS01G0262600 | CUFF.471.1 | OS01T02626(i | TSS1332 | 2.216E-26 |           |
| chr1 | TCONS_00001330 | XLOC_001323 | 9326743  | 9326955  | + | 1 | OS01G0270100 | CUFF.377.1 | OS01T02701(i | TSS1404 | 8.668E-12 |           |
| chr1 | TCONS_00011880 | XLOC_001363 | 9660150  | 9660819  | + | 1 | RPL30        | CUFF.523.1 | OS01T02760(x | TSS1445 | 0.33997   |           |
| chr1 | TCONS_00011884 | XLOC_001372 | 9697937  | 9698461  | + | 1 | OS01G0276700 | CUFF.514.1 | OS01T02767(i | TSS1455 | 9.239E-09 |           |
| chr1 | TCONS_00011890 | XLOC_001413 | 9937977  | 9938229  | + | 1 | OS01G0280000 | CUFF.524.1 | OS01T02800(i | TSS1499 | 1.527E-35 |           |
| chr1 | TCONS_00011891 | XLOC_001446 | 10201824 | 10202029 | + | 1 | OS01G0284900 | CUFF.533.1 | OS01T02849(i | TSS1532 | 2.529E-33 |           |
| chr1 | TCONS_00011892 | XLOC_001460 | 10321764 | 10321965 | + | 1 | NA           | CUFF.532.1 | NA           | u       | TSS1547   | 1.527E-35 |
| chr1 | TCONS_00011894 | XLOC_001467 | 10369491 | 10369975 | + | 1 | OS01G0288200 | CUFF.541.1 | OS01T02882(x | TSS1554 | 7.959E-31 |           |
| chr1 | TCONS_00011895 | XLOC_001485 | 10498126 | 10498341 | + | 1 | OS01G0290100 | CUFF.556.1 | OS01T02901(i | TSS1573 | 0.0001868 |           |

|      |                |             |          |          |   |   |              |            |              |         |           |           |
|------|----------------|-------------|----------|----------|---|---|--------------|------------|--------------|---------|-----------|-----------|
| chr1 | TCONS_00011898 | XLOC_001495 | 10563484 | 10563757 | + | 1 | OS01G0291500 | CUFF.566.1 | OS01T02915(x | TSS1585 | 8.854E-77 |           |
| chr1 | TCONS_00001517 | XLOC_001514 | 10806861 | 10807495 | + | 1 | OS01G0295700 | CUFF.419.1 | OS01T02957(x | TSS1607 | 2.281E-82 |           |
| chr1 | TCONS_00011902 | XLOC_001532 | 10981698 | 10981984 | + | 1 | OS01G0299500 | CUFF.577.1 | OS01T02995(i | TSS1626 | 2.248E-36 |           |
| chr1 | TCONS_00011907 | XLOC_001561 | 11233592 | 11234271 | + | 1 | OS01G0303600 | CUFF.585.1 | OS01T03036(x | TSS1656 | 3.453E-17 |           |
| chr1 | TCONS_00001658 | XLOC_001647 | 11909463 | 11909690 | + | 1 | OS01G0315800 | CUFF.464.1 | OS01T03158(x | TSS1746 | 3.452E-10 |           |
| chr1 | TCONS_00011915 | XLOC_001725 | 12624771 | 12625004 | + | 1 | NA           | CUFF.628.1 | NA           | u       | TSS1830   | 3.839E-19 |
| chr1 | TCONS_00001772 | XLOC_001755 | 12921133 | 12921352 | + | 1 | NA           | CUFF.480.1 | NA           | u       | TSS1861   | 9.688E-29 |
| chr1 | TCONS_00011920 | XLOC_001782 | 13257801 | 13258222 | + | 1 | OS01G0337600 | CUFF.672.1 | OS01T03376(i | TSS1889 | 7.205E-57 |           |
| chr1 | TCONS_00001801 | XLOC_001783 | 13259854 | 13260060 | + | 1 | OS01G0337600 | CUFF.510.1 | OS01T03376(x | TSS1890 | 0         |           |
| chr1 | TCONS_00001807 | XLOC_001788 | 13287337 | 13287540 | + | 1 | OS01G0338000 | CUFF.498.1 | OS01T03380(i | TSS1895 | 0         |           |
| chr1 | TCONS_00011925 | XLOC_001835 | 13637495 | 13637925 | + | 1 | NA           | CUFF.658.1 | NA           | u       | TSS1942   | 3.839E-19 |
| chr1 | TCONS_00011926 | XLOC_001836 | 13640673 | 13641048 | + | 1 | NA           | CUFF.659.1 | NA           | u       | TSS1944   | 2.74E-48  |
| chr1 | TCONS_00011928 | XLOC_001852 | 13837963 | 13838648 | + | 1 | NA           | CUFF.667.1 | NA           | u       | TSS1960   | 2.343E-45 |
| chr1 | TCONS_00001912 | XLOC_001893 | 14212583 | 14212784 | + | 1 | NA           | CUFF.521.1 | NA           | u       | TSS2003   | 0         |
| chr1 | TCONS_00011932 | XLOC_001905 | 14295492 | 14295893 | + | 1 | OS01G0355500 | CUFF.686.1 | OS01T03555(i | TSS2015 | 5.418E-30 |           |
| chr1 | TCONS_00011933 | XLOC_001906 | 14296605 | 14297129 | + | 1 | OS01G0355500 | CUFF.689.1 | OS01T03555(i | TSS2016 | 5.592E-20 |           |
| chr1 | TCONS_00001929 | XLOC_001915 | 14354102 | 14354535 | + | 1 | OS01G0356400 | CUFF.537.1 | OS01T03564(i | TSS2026 | 1.979E-29 |           |
| chr1 | TCONS_00011937 | XLOC_001915 | 14353823 | 14354302 | + | 1 | OS01G0356400 | CUFF.706.1 | OS01T03564(i | TSS2025 | 1.045E-19 |           |
| chr1 | TCONS_00001930 | XLOC_001916 | 14354657 | 14354886 | + | 1 | OS01G0356400 | CUFF.539.1 | OS01T03564(i | TSS2027 | 3.765E-36 |           |
| chr1 | TCONS_00011938 | XLOC_001916 | 14354783 | 14355051 | + | 1 | OS01G0356400 | CUFF.708.1 | OS01T03564(i | TSS2028 | 8.626E-16 |           |
| chr1 | TCONS_00011946 | XLOC_002014 | 15169865 | 15170400 | + | 1 | NA           | CUFF.724.1 | NA           | u       | TSS2132   | 2.542E-23 |
| chr1 | TCONS_00011953 | XLOC_002107 | 16220055 | 16220474 | + | 1 | NA           | CUFF.742.1 | NA           | u       | TSS2228   | 1.959E-24 |
| chr1 | TCONS_00002135 | XLOC_002115 | 16260944 | 16261152 | + | 1 | NA           | CUFF.576.1 | NA           | u       | TSS2236   | 0         |
| chr1 | TCONS_00002139 | XLOC_002120 | 16326575 | 16326818 | + | 1 | OS01G0388000 | CUFF.587.1 | OS01T03880(i | TSS2241 | 5.262E-22 |           |
| chr1 | TCONS_00011956 | XLOC_002121 | 16346780 | 16347127 | + | 1 | NA           | CUFF.746.1 | NA           | u       | TSS2242   | 2.956E-40 |
| chr1 | TCONS_00002194 | XLOC_002176 | 17069005 | 17069223 | + | 1 | OS01G0496900 | CUFF.606.1 | OS01T04969(x | TSS2300 | 3.488E-37 |           |
| chr1 | TCONS_00011965 | XLOC_002184 | 17211987 | 17212496 | + | 1 | OS01G0499300 | CUFF.800.1 | OS01T04993(x | TSS2308 | 1.959E-24 |           |
| chr1 | TCONS_00011974 | XLOC_002221 | 17618971 | 17619302 | + | 1 | OS01G0506200 | CUFF.812.1 | OS01T05062(i | TSS2346 | 9.234E-38 |           |
| chr1 | TCONS_00002282 | XLOC_002264 | 18091083 | 18091498 | + | 1 | OS01G0513100 | CUFF.633.1 | OS01T05131(i | TSS2391 | 3.091E-19 |           |
| chr1 | TCONS_00011975 | XLOC_002265 | 18094150 | 18094558 | + | 1 | NA           | CUFF.825.1 | NA           | u       | TSS2392   | 0.47313   |
| chr1 | TCONS_00002317 | XLOC_002300 | 18417154 | 18417389 | + | 1 | NA           | CUFF.641.1 | NA           | u       | TSS2431   | 2.603E-09 |
| chr1 | TCONS_00002319 | XLOC_002303 | 18427044 | 18427275 | + | 1 | NA           | CUFF.640.1 | NA           | u       | TSS2434   | 2.321E-32 |
| chr1 | TCONS_00011984 | XLOC_002305 | 18431549 | 18431832 | + | 1 | NA           | CUFF.840.1 | NA           | u       | TSS2436   | 4.293E-21 |
| chr1 | TCONS_00002353 | XLOC_002347 | 18730092 | 18730294 | + | 1 | NA           | CUFF.661.1 | NA           | u       | TSS2481   | 5.608E-86 |
| chr1 | TCONS_00002354 | XLOC_002348 | 18730686 | 18730908 | + | 1 | NA           | CUFF.660.1 | NA           | u       | TSS2482   | 2.768E-79 |



|      |                |             |          |          |   |   |              |            |              |         |                   |
|------|----------------|-------------|----------|----------|---|---|--------------|------------|--------------|---------|-------------------|
| chr1 | TCONS_00002371 | XLOC_002365 | 18855106 | 18855332 | + | 1 | OS01G0526200 | CUFF.666.1 | OS01T05262(i | TSS2499 | 9.344E-20         |
| chr1 | TCONS_00011998 | XLOC_002375 | 18944500 | 18944721 | + | 1 | NA           | CUFF.877.1 | NA           | u       | TSS2509 2.943E-20 |
| chr1 | TCONS_00002401 | XLOC_002394 | 19104420 | 19104620 | + | 1 | NA           | CUFF.667.1 | NA           | u       | TSS2529 0         |
| chr1 | TCONS_00002405 | XLOC_002396 | 19114270 | 19114488 | + | 1 | OS01G0531000 | CUFF.675.1 | OS01T05310(i | TSS2531 | 1.168E-41         |
| chr1 | TCONS_00002410 | XLOC_002402 | 19181166 | 19181391 | + | 1 | OS01G0532200 | CUFF.686.1 | OS01T05322(i | TSS2537 | 2.734E-35         |
| chr1 | TCONS_00012000 | XLOC_002409 | 19258282 | 19258615 | + | 1 | OS01G0533000 | CUFF.894.1 | OS01T05330(x | TSS2544 | 2.851E-38         |
| chr1 | TCONS_00002418 | XLOC_002410 | 19261974 | 19262188 | + | 1 | OS01G0533000 | CUFF.685.1 | OS01T05330(i | TSS2545 | 2.74E-16          |
| chr1 | TCONS_00002425 | XLOC_002421 | 19316044 | 19316285 | + | 1 | NA           | CUFF.683.1 | NA           | u       | TSS2556 0         |
| chr1 | TCONS_00002438 | XLOC_002432 | 19404336 | 19404690 | + | 1 | OS01G0534900 | CUFF.702.1 | OS01T05349(i | TSS2569 | 3.854E-21         |
| chr1 | TCONS_00002445 | XLOC_002438 | 19472543 | 19472752 | + | 1 | CIPK8        | CUFF.690.1 | OS01T05360(x | TSS2576 | 5.617E-52         |
| chr1 | TCONS_00002520 | XLOC_002501 | 20467715 | 20467922 | + | 1 | NA           | CUFF.707.1 | NA           | u       | TSS2648 2.306E-10 |
| chr1 | TCONS_00002570 | XLOC_002548 | 20943608 | 20943825 | + | 1 | OS01G0555300 | CUFF.724.1 | OS01T05553(i | TSS2700 | 1.049E-32         |
| chr1 | TCONS_00012018 | XLOC_002567 | 21145982 | 21146186 | + | 1 | RIC1         | CUFF.963.1 | OS01T05586(i | TSS2719 | 2.529E-33         |
| chr1 | TCONS_00002610 | XLOC_002586 | 21263623 | 21263840 | + | 1 | NCRNA_52546  | CUFF.742.1 | NCRNA_525·x  | TSS2742 | 3.176E-77         |
| chr1 | TCONS_00012020 | XLOC_002610 | 21623430 | 21623630 | + | 1 | NA           | CUFF.964.1 | NA           | u       | TSS2767 1.387E-18 |
| chr1 | TCONS_00012023 | XLOC_002615 | 21638711 | 21638961 | + | 1 | NA           | CUFF.968.1 | NA           | u       | TSS2773 0.01177   |
| chr1 | TCONS_00002684 | XLOC_002656 | 21927040 | 21927261 | + | 1 | OS01G0571166 | CUFF.768.1 | OS01T05711(x | TSS2818 | 3.451E-32         |
| chr1 | TCONS_00012026 | XLOC_002668 | 22023731 | 22024180 | + | 1 | OS01G0572700 | CUFF.994.1 | OS01T05727(x | TSS2831 | 6.57E-17          |
| chr1 | TCONS_00012028 | XLOC_002715 | 22498099 | 22498382 | + | 1 | OS01G0580800 | CUFF.1029  | OS01T05808(i | TSS2880 | 1.233E-59         |
| chr1 | TCONS_00002759 | XLOC_002726 | 22589310 | 22589608 | + | 1 | NA           | CUFF.787.1 | NA           | u       | TSS2891 1.037E-48 |
| chr1 | TCONS_00002805 | XLOC_002773 | 22956635 | 22956998 | + | 1 | LOG          | CUFF.808.1 | OS01T05889(x | TSS2940 | 0.17233           |
| chr1 | TCONS_00002886 | XLOC_002851 | 23748498 | 23748704 | + | 1 | OS01G0603100 | CUFF.831.1 | OS01T06031(i | TSS3022 | 3.945E-21         |
| chr1 | TCONS_00012043 | XLOC_002881 | 23948306 | 23948848 | + | 1 | OS01G0607400 | CUFF.1104  | OS01T06074(i | TSS3054 | 1.388E-30         |
| chr1 | TCONS_00002916 | XLOC_002882 | 23948909 | 23949135 | + | 1 | OS01G0607400 | CUFF.837.1 | OS01T06074(i | TSS3055 | 4.042E-30         |
| chr1 | TCONS_00012046 | XLOC_002890 | 24024284 | 24024585 | + | 1 | NA           | CUFF.1095  | NA           | u       | TSS3064 2.838E-66 |
| chr1 | TCONS_00002925 | XLOC_002892 | 24066610 | 24066810 | + | 1 | PDR2         | CUFF.840.1 | OS01T06092(i | TSS3066 | 0                 |
| chr1 | TCONS_00012047 | XLOC_002900 | 24153159 | 24153364 | + | 1 | OS01G0610500 | CUFF.1108  | OS01T06105(i | TSS3074 | 2.638E-18         |
| chr1 | TCONS_00002940 | XLOC_002907 | 24241949 | 24242308 | + | 1 | OS01G0611900 | CUFF.852.1 | OS01T06119(i | TSS3082 | 2.94E-50          |
| chr1 | TCONS_00002964 | XLOC_002933 | 24390148 | 24390377 | + | 1 | NCRNA_10318  | CUFF.851.1 | NCRNA_103 x  | TSS3109 | 1.578E-37         |
| chr1 | TCONS_00012054 | XLOC_002938 | 24399553 | 24399774 | + | 1 | OS01G0615300 | CUFF.1133  | OS01T06153(x | TSS3114 | 3.453E-17         |
| chr1 | TCONS_00012056 | XLOC_002943 | 24475773 | 24475979 | + | 1 | OS01G0616400 | CUFF.1124  | OS01T06164(i | TSS3121 | 2.638E-18         |
| chr1 | TCONS_00002980 | XLOC_002951 | 24503386 | 24503613 | + | 1 | OS01G0616900 | CUFF.861.1 | OS01T06169(x | TSS3129 | 7.057E-33         |
| chr1 | TCONS_00002982 | XLOC_002953 | 24537282 | 24537650 | + | 1 | OS01G0617500 | CUFF.868.1 | OS01T06175(i | TSS3131 | 4.81E-71          |
| chr1 | TCONS_00002983 | XLOC_002954 | 24542905 | 24543128 | + | 1 | OS01G0617500 | CUFF.869.1 | OS01T06175(i | TSS3132 | 1.356E-15         |
| chr1 | TCONS_00012064 | XLOC_002987 | 24814899 | 24815168 | + | 1 | OS01G0622033 | CUFF.1152  | OS01T06220:i | TSS3168 | 4.359E-41         |

|      |                |             |          |          |   |   |              |            |              |         |                   |
|------|----------------|-------------|----------|----------|---|---|--------------|------------|--------------|---------|-------------------|
| chr1 | TCONS_00012068 | XLOC_003019 | 25032570 | 25032819 | + | 1 | OS01G0626900 | CUFF.1173  | OS01T06269(i | TSS3201 | 8.155E-21         |
| chr1 | TCONS_00012072 | XLOC_003060 | 25417267 | 25417620 | + | 1 | NA           | CUFF.1181  | NA           | u       | TSS3245 3.983E-06 |
| chr1 | TCONS_00003115 | XLOC_003090 | 25643543 | 25644061 | + | 1 | OS01G0639200 | CUFF.903.1 | OS01T06392(i | TSS3276 | 0.0013712         |
| chr1 | TCONS_00003127 | XLOC_003103 | 25780753 | 25780978 | + | 1 | OS01G0641700 | CUFF.908.1 | OS01T06417(x | TSS3290 | 1.696E-26         |
| chr1 | TCONS_00012081 | XLOC_003134 | 26064374 | 26065425 | + | 1 | OS01G0646700 | CUFF.1212  | OS01T06467(x | TSS3322 | 0.0929            |
| chr1 | TCONS_00012083 | XLOC_003139 | 26080173 | 26080428 | + | 1 | OS01G0647100 | CUFF.1218  | OS01T06471(x | TSS3329 | 1.959E-24         |
| chr1 | TCONS_00003170 | XLOC_003144 | 26124265 | 26124499 | + | 1 | AKT1         | CUFF.922.1 | OS01T06480(x | TSS3335 | 6.676E-08         |
| chr1 | TCONS_00012087 | XLOC_003207 | 26703981 | 26704425 | + | 1 | NA           | CUFF.1708  | NA           | u       | TSS3402 9.541E-18 |
| chr1 | TCONS_00012088 | XLOC_003216 | 26770800 | 26771180 | + | 1 | NA           | CUFF.1711  | NA           | u       | TSS3413 6.161E-27 |
| chr1 | TCONS_00012089 | XLOC_003217 | 26779901 | 26780214 | + | 1 | NA           | CUFF.1714  | NA           | u       | TSS3414 1.187E-36 |
| chr1 | TCONS_00012090 | XLOC_003223 | 26804658 | 26805246 | + | 1 | OS01G0658900 | CUFF.1719  | OS01T06589(i | TSS3420 | 1.815E-17         |
| chr1 | TCONS_00012092 | XLOC_003248 | 27028483 | 27028888 | + | 1 | NA           | CUFF.1730  | NA           | u       | TSS3445 6.268E-22 |
| chr1 | TCONS_00003298 | XLOC_003268 | 27196576 | 27196802 | + | 1 | NA           | CUFF.953.1 | NA           | u       | TSS3468 2.78E-40  |
| chr1 | TCONS_00012099 | XLOC_003284 | 27310046 | 27310431 | + | 1 | OS01G0667700 | CUFF.1262  | OS01T06677(i | TSS3485 | 1.033E-24         |
| chr1 | TCONS_00012102 | XLOC_003317 | 27632999 | 27633226 | + | 1 | OS01G0672800 | CUFF.1256  | OS01T06728(x | TSS3521 | 8.25E-41          |
| chr1 | TCONS_00003354 | XLOC_003321 | 27662206 | 27662416 | + | 1 | OS01G0673500 | CUFF.983.1 | OS01T06735(i | TSS3525 | 3.24E-71          |
| chr1 | TCONS_00012106 | XLOC_003328 | 27677773 | 27677975 | + | 1 | OS01G0673800 | CUFF.1283  | OS01T06738(x | TSS3532 | 1.387E-18         |
| chr1 | TCONS_00012107 | XLOC_003329 | 27678380 | 27678922 | + | 1 | OS01G0673800 | CUFF.1280  | OS01T06738(x | TSS3533 | 1.643E-15         |
| chr1 | TCONS_00012109 | XLOC_003332 | 27684413 | 27684932 | + | 1 | NA           | CUFF.1255  | NA           | u       | TSS3536 0.36989   |
| chr1 | TCONS_00003363 | XLOC_003337 | 27698071 | 27698585 | + | 1 | OS01G0674100 | CUFF.994.1 | OS01T06741(i | TSS3541 | 1.003E-14         |
| chr1 | TCONS_00012115 | XLOC_003364 | 27920339 | 27920542 | + | 1 | TPC1         | CUFF.1285  | OS01T06785(i | TSS3569 | 6.641E-47         |
| chr1 | TCONS_00012120 | XLOC_003395 | 28091846 | 28092997 | + | 1 | NA           | CUFF.1308  | NA           | u       | TSS3605 0.0001216 |
| chr1 | TCONS_00012121 | XLOC_003398 | 28094224 | 28095753 | + | 1 | NA           | CUFF.1317  | NA           | u       | TSS3610 2.863E-16 |
| chr1 | TCONS_00012122 | XLOC_003399 | 28095979 | 28096411 | + | 1 | NA           | CUFF.1318  | NA           | u       | TSS3612 3.301E-22 |
| chr1 | TCONS_00012123 | XLOC_003403 | 28120924 | 28121408 | + | 1 | NA           | CUFF.1295  | NA           | u       | TSS3616 1.685E-05 |
| chr1 | TCONS_00003479 | XLOC_003453 | 28488201 | 28488499 | + | 1 | OS01G0689900 | CUFF.1075  | OS01T06899(i | TSS3667 | 1.034E-68         |
| chr1 | TCONS_00003481 | XLOC_003455 | 28490636 | 28491247 | + | 1 | OS01G0689900 | CUFF.1079  | OS01T06899(i | TSS3669 | 0.19301           |
| chr1 | TCONS_00012129 | XLOC_003456 | 28492137 | 28493807 | + | 1 | OS01G0689900 | CUFF.1372  | OS01T06899(i | TSS3671 | 0.25339           |
| chr1 | TCONS_00012130 | XLOC_003457 | 28494612 | 28495155 | + | 1 | OS01G0689900 | CUFF.1361  | OS01T06899(i | TSS3674 | 3.51E-47          |
| chr1 | TCONS_00003494 | XLOC_003467 | 28544263 | 28544561 | + | 1 | OS01G0691500 | CUFF.1044  | OS01T06915(i | TSS3684 | 7.586E-88         |
| chr1 | TCONS_00012131 | XLOC_003477 | 28582976 | 28583181 | + | 1 | OS01G0692700 | CUFF.1325  | OS01T06927(x | TSS3695 | 1.19E-21          |
| chr1 | TCONS_00003506 | XLOC_003478 | 28583628 | 28583851 | + | 1 | OS01G0692700 | CUFF.1051  | OS01T06927(x | TSS3696 | 7.296E-43         |
| chr1 | TCONS_00003516 | XLOC_003488 | 28686961 | 28687174 | + | 1 | NA           | CUFF.1039  | NA           | u       | TSS3707 8.344E-52 |
| chr1 | TCONS_00012135 | XLOC_003493 | 28692179 | 28692599 | + | 1 | NA           | CUFF.1331  | NA           | u       | TSS3712 1.671E-50 |
| chr1 | TCONS_00003529 | XLOC_003501 | 28753312 | 28753548 | + | 1 | OS01G0695300 | CUFF.1055  | OS01T06953(x | TSS3722 | 2.741E-25         |

|      |                |             |          |          |   |   |              |                        |   |         |           |
|------|----------------|-------------|----------|----------|---|---|--------------|------------------------|---|---------|-----------|
| chr1 | TCONS_00012145 | XLOC_003516 | 28819950 | 28820540 | + | 1 | NA           | CUFF.1347 NA           | u | TSS3738 | 1.307E-09 |
| chr1 | TCONS_00003543 | XLOC_003520 | 28879124 | 28879325 | + | 1 | NA           | CUFF.1059 NA           | u | TSS3742 | 0         |
| chr1 | TCONS_00003586 | XLOC_003559 | 29216521 | 29216744 | + | 1 | NA           | CUFF.1072 NA           | u | TSS3784 | 1.237E-35 |
| chr1 | TCONS_00012155 | XLOC_003607 | 29588846 | 29589574 | + | 1 | NA           | CUFF.1394 NA           | u | TSS3836 | 4.812E-09 |
| chr1 | TCONS_00012158 | XLOC_003616 | 29653678 | 29653979 | + | 1 | NA           | CUFF.1402 NA           | u | TSS3846 | 4.706E-07 |
| chr1 | TCONS_00012159 | XLOC_003617 | 29654056 | 29654257 | + | 1 | NA           | CUFF.1403 NA           | u | TSS3847 | 1.512E-25 |
| chr1 | TCONS_00003649 | XLOC_003624 | 29658696 | 29658904 | + | 1 | NA           | CUFF.1109 NA           | u | TSS3854 | 6.351E-74 |
| chr1 | TCONS_00012164 | XLOC_003628 | 29662401 | 29662628 | + | 1 | NA           | CUFF.1418 NA           | u | TSS3858 | 0.0027408 |
| chr1 | TCONS_00012166 | XLOC_003630 | 29664051 | 29664253 | + | 1 | NA           | CUFF.1415 NA           | u | TSS3861 | 6.268E-22 |
| chr1 | TCONS_00012172 | XLOC_003636 | 29669016 | 29669225 | + | 1 | NA           | CUFF.1420 NA           | u | TSS3869 | 1.947E-29 |
| chr1 | TCONS_00012173 | XLOC_003637 | 29669827 | 29670120 | + | 1 | NA           | CUFF.1423 NA           | u | TSS3870 | 1.027E-29 |
| chr1 | TCONS_00012189 | XLOC_003755 | 30468122 | 30468327 | + | 1 | NA           | CUFF.1481 NA           | u | TSS4003 | 5.418E-30 |
| chr1 | TCONS_00012198 | XLOC_003826 | 30841564 | 30841936 | + | 1 | NA           | CUFF.1503 NA           | u | TSS4081 | 2.956E-40 |
| chr1 | TCONS_00012199 | XLOC_003828 | 30843414 | 30843694 | + | 1 | NA           | CUFF.1508 NA           | u | TSS4084 | 1.739E-22 |
| chr1 | TCONS_00012202 | XLOC_003844 | 30938212 | 30938965 | + | 1 | NA           | CUFF.1513 NA           | u | TSS4100 | 0.0070722 |
| chr1 | TCONS_00012211 | XLOC_003882 | 31128340 | 31128720 | + | 1 | OS01G0744400 | CUFF.1540 OS01T07444(x | u | TSS4141 | 1.859E-10 |
| chr1 | TCONS_00003927 | XLOC_003906 | 31298391 | 31298621 | + | 1 | NA           | CUFF.1180 NA           | u | TSS4167 | 6.037E-51 |
| chr1 | TCONS_00003961 | XLOC_003939 | 31485436 | 31485684 | + | 1 | NA           | CUFF.1194 NA           | u | TSS4201 | 8.252E-13 |
| chr1 | TCONS_00012219 | XLOC_003951 | 31558069 | 31558350 | + | 1 | NA           | CUFF.1547 NA           | u | TSS4214 | 3.547E-20 |
| chr1 | TCONS_00012221 | XLOC_003959 | 31588455 | 31588722 | + | 1 | OS01G0752800 | CUFF.1567 OS01T07528(i | u | TSS4222 | 3.047E-45 |
| chr1 | TCONS_00012229 | XLOC_003991 | 31741891 | 31742093 | + | 1 | OS01G0756501 | CUFF.1569 OS01T07565(i | u | TSS4256 | 2.943E-20 |
| chr1 | TCONS_00012230 | XLOC_004013 | 31897608 | 31897810 | + | 1 | NA           | CUFF.1568 NA           | u | TSS4279 | 6.173E-32 |
| chr1 | TCONS_00012235 | XLOC_004045 | 32072453 | 32072729 | + | 1 | OS01G0762400 | CUFF.1584 OS01T07624(x | u | TSS4312 | 1.043E-12 |
| chr1 | TCONS_00012241 | XLOC_004074 | 32185138 | 32185355 | + | 1 | NA           | CUFF.1588 NA           | u | TSS4343 | 1.815E-17 |
| chr1 | TCONS_00012243 | XLOC_004088 | 32301423 | 32301627 | + | 1 | OS01G0766600 | CUFF.1613 OS01T07666(i | u | TSS4357 | 1.19E-21  |
| chr1 | TCONS_00004101 | XLOC_004093 | 32329139 | 32330019 | + | 1 | NA           | CUFF.1237 NA           | u | TSS4363 | 1.414E-50 |
| chr1 | TCONS_00012247 | XLOC_004093 | 32329806 | 32330322 | + | 1 | NA           | CUFF.1601 NA           | u | TSS4364 | 0.0075314 |
| chr1 | TCONS_00004153 | XLOC_004142 | 32600103 | 32600333 | + | 1 | OS01G0772200 | CUFF.1255 OS01T07722(i | u | TSS4417 | 6.676E-08 |
| chr1 | TCONS_00012256 | XLOC_004164 | 32763393 | 32763624 | + | 1 | OS01G0775100 | CUFF.1642 OS01T07751(i | u | TSS4439 | 1.399E-06 |
| chr1 | TCONS_00004190 | XLOC_004178 | 32855126 | 32855417 | + | 1 | NA           | CUFF.1275 NA           | u | TSS4454 | 0.12416   |
| chr1 | TCONS_00004191 | XLOC_004179 | 32856509 | 32857772 | + | 1 | OS01G0776700 | CUFF.1276 OS01T07767(x | u | TSS4455 | 6.698E-28 |
| chr1 | TCONS_00004251 | XLOC_004235 | 33189169 | 33189415 | + | 1 | OS01G0783200 | CUFF.1293 OS01T07832(i | u | TSS4513 | 1.121E-17 |
| chr1 | TCONS_00012265 | XLOC_004265 | 33369320 | 33369533 | + | 1 | OS01G0786900 | CUFF.1684 OS01T07869(i | u | TSS4544 | 6.701E-47 |
| chr1 | TCONS_00012267 | XLOC_004282 | 33505314 | 33505992 | + | 1 | NCRNA_47034  | CUFF.1696 NCRNA_470:x  | u | TSS4564 | 1.128E-10 |
| chr1 | TCONS_00004308 | XLOC_004291 | 33534956 | 33535365 | + | 1 | NA           | CUFF.1374 NA           | u | TSS4573 | 5.22E-71  |

|      |                |             |          |          |   |   |              |                          |         |           |
|------|----------------|-------------|----------|----------|---|---|--------------|--------------------------|---------|-----------|
| chr1 | TCONS_00004309 | XLOC_004292 | 33535538 | 33538331 | + | 1 | NCRNA_1517   | CUFF.1374 NCRNA_151'x    | TSS4574 | 1.592E-23 |
| chr1 | TCONS_00004310 | XLOC_004293 | 33538473 | 33539059 | + | 1 | NCRNA_1330   | CUFF.1374 NCRNA_1330'x   | TSS4575 | 1.447E-19 |
| chr1 | TCONS_00004311 | XLOC_004294 | 33539321 | 33539647 | + | 1 | NA           | CUFF.1374 NA u           | TSS4576 | 9.253E-11 |
| chr1 | TCONS_00004320 | XLOC_004303 | 33582691 | 33583229 | + | 1 | NA           | CUFF.1315 NA u           | TSS4585 | 0         |
| chr1 | TCONS_00004323 | XLOC_004306 | 33584279 | 33585812 | + | 1 | NA           | CUFF.1317 NA u           | TSS4588 | 2.616E-26 |
| chr1 | TCONS_00004325 | XLOC_004308 | 33586381 | 33587558 | + | 1 | NCRNA_34987  | CUFF.1760 NCRNA_34987'x  | TSS4591 | 0         |
| chr1 | TCONS_00012270 | XLOC_004316 | 33613441 | 33613646 | + | 1 | OS01G0793500 | CUFF.1760 OS01T0793500'x | TSS4600 | 2.638E-18 |
| chr1 | TCONS_00004338 | XLOC_004320 | 33652487 | 33652804 | + | 1 | OS01G0794500 | CUFF.1331 OS01T0794500'i | TSS4604 | 5.931E-42 |
| chr1 | TCONS_00004346 | XLOC_004326 | 33663891 | 33664127 | + | 1 | OS01G0794900 | CUFF.1339 OS01T0794900'i | TSS4610 | 1.135E-31 |
| chr1 | TCONS_00012273 | XLOC_004385 | 34004365 | 34004727 | + | 1 | OS01G0802700 | CUFF.1762 OS01T0802700'i | TSS4673 | 2.542E-23 |
| chr1 | TCONS_00004435 | XLOC_004406 | 34163523 | 34163760 | + | 1 | OS01G0805800 | CUFF.1350 OS01T0805800'x | TSS4696 | 0         |
| chr1 | TCONS_00012276 | XLOC_004424 | 34264509 | 34264891 | + | 1 | NA           | CUFF.1763 NA u           | TSS4714 | 6.604E-06 |
| chr1 | TCONS_00012277 | XLOC_004428 | 34298201 | 34298672 | + | 1 | OS01G0807900 | CUFF.1763 OS01T0807900'i | TSS4719 | 1.991E-12 |
| chr1 | TCONS_00012278 | XLOC_004429 | 34298809 | 34299212 | + | 1 | OS01G0807900 | CUFF.1763 OS01T0807900'i | TSS4720 | 4.293E-21 |
| chr1 | TCONS_00012279 | XLOC_004432 | 34310159 | 34310801 | + | 1 | OS01G0808100 | CUFF.1764 OS01T0808100'x | TSS4723 | 1.307E-09 |
| chr1 | TCONS_00004474 | XLOC_004449 | 34449145 | 34449359 | + | 1 | OS01G0810800 | CUFF.1366 OS01T0810800'i | TSS4740 | 1.54E-48  |
| chr1 | TCONS_00012283 | XLOC_004467 | 34558283 | 34558588 | + | 1 | OS01G0812900 | CUFF.1758 OS01T0812900'x | TSS4759 | 2.216E-26 |
| chr1 | TCONS_00012290 | XLOC_004499 | 34745690 | 34745894 | + | 1 | OS01G0816550 | CUFF.1772 OS01T0816550'i | TSS4793 | 2.638E-18 |
| chr1 | TCONS_00004523 | XLOC_004503 | 34771010 | 34771216 | + | 1 | OS01G0817000 | CUFF.1374 OS01T0817000'i | TSS4797 | 0         |
| chr1 | TCONS_00004525 | XLOC_004505 | 34778885 | 34779090 | + | 1 | OS01G0817100 | CUFF.1373 OS01T0817100'i | TSS4799 | 0         |
| chr1 | TCONS_00004543 | XLOC_004521 | 34874666 | 34875172 | + | 1 | OS01G0818700 | CUFF.1385 OS01T0818700'i | TSS4816 | 8.269E-55 |
| chr1 | TCONS_00012292 | XLOC_004521 | 34874815 | 34875380 | + | 1 | OS01G0818700 | CUFF.1781 OS01T0818700'i | TSS4817 | 0.064141  |
| chr1 | TCONS_00004544 | XLOC_004522 | 34875495 | 34875837 | + | 1 | OS01G0818700 | CUFF.1388 OS01T0818700'i | TSS4818 | 7.639E-16 |
| chr1 | TCONS_00012294 | XLOC_004523 | 34877812 | 34878047 | + | 1 | OS01G0818700 | CUFF.1780 OS01T0818700'x | TSS4819 | 5.104E-61 |
| chr1 | TCONS_00012297 | XLOC_004554 | 35092562 | 35092816 | + | 1 | NA           | CUFF.1784 NA u           | TSS4851 | 0.01177   |
| chr1 | TCONS_00012299 | XLOC_004556 | 35097789 | 35098100 | + | 1 | OS01G0822200 | CUFF.1792 OS01T0822200'x | TSS4853 | 1.61E-45  |
| chr1 | TCONS_00012301 | XLOC_004566 | 35185190 | 35185584 | + | 1 | NA           | CUFF.1801 NA u           | TSS4864 | 2.171E-10 |
| chr1 | TCONS_00012303 | XLOC_004571 | 35203335 | 35203872 | + | 1 | NA           | CUFF.1795 NA u           | TSS4870 | 1.033E-24 |
| chr1 | TCONS_00004609 | XLOC_004592 | 35397652 | 35397892 | + | 1 | OS01G0827200 | CUFF.1398 OS01T0827200'i | TSS4893 | 4.981E-14 |
| chr1 | TCONS_00004645 | XLOC_004631 | 35602737 | 35602980 | + | 1 | OS01G0832000 | CUFF.1406 OS01T0832000'i | TSS4933 | 9.195E-12 |
| chr1 | TCONS_00012313 | XLOC_004657 | 35764750 | 35764962 | + | 1 | NA           | CUFF.1820 NA u           | TSS4959 | 8.69E-09  |
| chr1 | TCONS_00004687 | XLOC_004671 | 35869983 | 35870186 | + | 1 | NA           | CUFF.1419 NA u           | TSS4976 | 3.815E-63 |
| chr1 | TCONS_00004688 | XLOC_004672 | 35871293 | 35871502 | + | 1 | OS01G0836800 | CUFF.1425 OS01T0836800'x | TSS4977 | 0         |
| chr1 | TCONS_00004700 | XLOC_004682 | 35917175 | 35917418 | + | 1 | NA           | CUFF.1429 NA u           | TSS4987 | 1.439E-60 |
| chr1 | TCONS_00012318 | XLOC_004688 | 35962413 | 35962732 | + | 1 | NA           | CUFF.1837 NA u           | TSS4994 | 2.673E-53 |

|      |                |             |          |          |   |   |              |           |              |   |         |           |
|------|----------------|-------------|----------|----------|---|---|--------------|-----------|--------------|---|---------|-----------|
| chr1 | TCONS_00012319 | XLOC_004689 | 35963593 | 35963800 | + | 1 | NA           | CUFF.1830 | NA           | u | TSS4995 | 2.863E-13 |
| chr1 | TCONS_00004714 | XLOC_004697 | 36019703 | 36019937 | + | 1 | OS01G0839700 | CUFF.1438 | OS01T08397(x |   | TSS5003 | 8.942E-30 |
| chr1 | TCONS_00004716 | XLOC_004699 | 36021934 | 36022146 | + | 1 | OS01G0839700 | CUFF.1441 | OS01T08397(x |   | TSS5005 | 0         |
| chr1 | TCONS_00004717 | XLOC_004700 | 36022514 | 36022882 | + | 1 | OS01G0839700 | CUFF.1443 | OS01T08397(x |   | TSS5006 | 1.741E-80 |
| chr1 | TCONS_00012320 | XLOC_004704 | 36084015 | 36084267 | + | 1 | OS01G0840700 | CUFF.1848 | OS01T08407(x |   | TSS5010 | 0.01177   |
| chr1 | TCONS_00012327 | XLOC_004737 | 36260944 | 36261324 | + | 1 | OS01G0844400 | CUFF.1861 | OS01T08444(x |   | TSS5046 | 9.234E-38 |
| chr1 | TCONS_00012329 | XLOC_004760 | 36399620 | 36399942 | + | 1 | OS01G0847300 | CUFF.1873 | OS01T08473(i |   | TSS5071 | 8.155E-21 |
| chr1 | TCONS_00012339 | XLOC_004840 | 37049039 | 37049292 | + | 1 | OS01G0857400 | CUFF.1906 | OS01T08574(i |   | TSS5159 | 3.396E-42 |
| chr1 | TCONS_00012343 | XLOC_004866 | 37185481 | 37185849 | + | 1 | OS01G0859500 | CUFF.1924 | OS01T08595(i |   | TSS5186 | 0.051036  |
| chr1 | TCONS_00012347 | XLOC_004899 | 37415445 | 37415647 | + | 1 | OS01G0864566 | CUFF.1917 | OS01T08645(x |   | TSS5220 | 7.656E-49 |
| chr1 | TCONS_00012348 | XLOC_004900 | 37418289 | 37418726 | + | 1 | NA           | CUFF.1911 | NA           | u | TSS5221 | 6.64E-12  |
| chr1 | TCONS_00012351 | XLOC_004903 | 37422336 | 37422756 | + | 1 | NA           | CUFF.1916 | NA           | u | TSS5225 | 6.241E-30 |
| chr1 | TCONS_00012366 | XLOC_004989 | 37905177 | 37905519 | + | 1 | NA           | CUFF.1971 | NA           | u | TSS5323 | 1.387E-18 |
| chr1 | TCONS_00012372 | XLOC_005015 | 38087583 | 38088251 | + | 1 | OS01G0877600 | CUFF.2009 | OS01T08776(i |   | TSS5351 | 6.161E-27 |
| chr1 | TCONS_00012376 | XLOC_005063 | 38431367 | 38431775 | + | 1 | NA           | CUFF.2010 | NA           | u | TSS5404 | 1.044E-08 |
| chr1 | TCONS_00005097 | XLOC_005064 | 38432156 | 38432364 | + | 1 | NA           | CUFF.1550 | NA           | u | TSS5405 | 0         |
| chr1 | TCONS_00005113 | XLOC_005079 | 38519143 | 38519350 | + | 1 | OS01G0886500 | CUFF.1556 | OS01T08865(i |   | TSS5421 | 5.528E-69 |
| chr1 | TCONS_00005125 | XLOC_005092 | 38623177 | 38623393 | + | 1 | NA           | CUFF.1558 | NA           | u | TSS5434 | 6.785E-89 |
| chr1 | TCONS_00012382 | XLOC_005132 | 38852790 | 38853332 | + | 1 | NA           | CUFF.2033 | NA           | u | TSS5476 | 9.077E-33 |
| chr1 | TCONS_00012391 | XLOC_005162 | 39016822 | 39017368 | + | 1 | NA           | CUFF.2047 | NA           | u | TSS5506 | 1.863E-24 |
| chr1 | TCONS_00005188 | XLOC_005163 | 39057387 | 39057996 | + | 1 | OS01G0898300 | CUFF.1583 | OS01T08983(x |   | TSS5508 | 0         |
| chr1 | TCONS_00012401 | XLOC_005242 | 39621898 | 39622133 | + | 1 | OS01G0909500 | CUFF.2090 | OS01T09095(i |   | TSS5592 | 1.136E-14 |
| chr1 | TCONS_00012402 | XLOC_005244 | 39627252 | 39627696 | + | 1 | NA           | CUFF.2079 | NA           | u | TSS5594 | 3.718E-24 |
| chr1 | TCONS_00012403 | XLOC_005247 | 39631068 | 39631591 | + | 1 | NA           | CUFF.2081 | NA           | u | TSS5597 | 1.492E-18 |
| chr1 | TCONS_00012408 | XLOC_005265 | 39708442 | 39708723 | + | 1 | NA           | CUFF.2086 | NA           | u | TSS5615 | 4.872E-05 |
| chr1 | TCONS_00012411 | XLOC_005289 | 39885571 | 39885793 | + | 1 | OS01G0915350 | CUFF.2097 | OS01T09153(i |   | TSS5640 | 1.643E-15 |
| chr1 | TCONS_00005312 | XLOC_005292 | 39915991 | 39916224 | + | 1 | OS01G0915800 | CUFF.1614 | OS01T09158(x |   | TSS5643 | 5.185E-37 |
| chr1 | TCONS_00012412 | XLOC_005314 | 40063618 | 40063879 | + | 1 | OS01G0918200 | CUFF.2105 | OS01T09182(x |   | TSS5665 | 8.061E-36 |
| chr1 | TCONS_00012413 | XLOC_005315 | 40064081 | 40064328 | + | 1 | NA           | CUFF.2130 | NA           | u | TSS5666 | 5.104E-61 |
| chr1 | TCONS_00005344 | XLOC_005327 | 40146449 | 40146676 | + | 1 | NA           | CUFF.1625 | NA           | u | TSS5678 | 3.698E-13 |
| chr1 | TCONS_00012418 | XLOC_005333 | 40172381 | 40172685 | + | 1 | OS01G0920200 | CUFF.2112 | OS01T09202(x |   | TSS5684 | 4.791E-33 |
| chr1 | TCONS_00012419 | XLOC_005364 | 40352106 | 40352306 | + | 1 | OS01G0922800 | CUFF.2156 | OS01T09228(i |   | TSS5717 | 1.508E-30 |
| chr1 | TCONS_00012426 | XLOC_005396 | 40486870 | 40487691 | + | 1 | NA           | CUFF.2155 | NA           | u | TSS5756 | 4.761E-69 |
| chr1 | TCONS_00012429 | XLOC_005409 | 40557539 | 40557746 | + | 1 | NA           | CUFF.2144 | NA           | u | TSS5773 | 3.414E-08 |
| chr1 | TCONS_00012431 | XLOC_005416 | 40590408 | 40590711 | + | 1 | NA           | CUFF.2147 | NA           | u | TSS5780 | 4.132E-12 |

|      |                |             |          |          |   |   |              |            |              |         |           |           |
|------|----------------|-------------|----------|----------|---|---|--------------|------------|--------------|---------|-----------|-----------|
| chr1 | TCONS_00005443 | XLOC_005421 | 40612675 | 40612913 | + | 1 | OS01G0926300 | CUFF.1672  | OS01T09263(x | TSS5786 | 8.316E-26 |           |
| chr1 | TCONS_00005445 | XLOC_005424 | 40634592 | 40635052 | + | 1 | OS01G0926700 | CUFF.1666  | OS01T09267(x | TSS5789 | 0         |           |
| chr1 | TCONS_00012435 | XLOC_005435 | 40677254 | 40677460 | + | 1 | OS01G0927400 | CUFF.2167  | OS01T09274(i | TSS5801 | 1.091E-44 |           |
| chr1 | TCONS_00005514 | XLOC_005491 | 40972793 | 40973352 | + | 1 | NA           | CUFF.1682  | NA           | u       | TSS5858   | 5.06E-59  |
| chr1 | TCONS_00012438 | XLOC_005522 | 41121006 | 41121449 | + | 1 | OS01G0936800 | CUFF.2194  | OS01T09368(i | TSS5893 | 1.512E-25 |           |
| chr1 | TCONS_00005596 | XLOC_005566 | 41397857 | 41398123 | + | 1 | OS01G0942300 | CUFF.1707  | OS01T09423(x | TSS5940 | 2.918E-21 |           |
| chr1 | TCONS_00005648 | XLOC_005613 | 41727006 | 41727325 | + | 1 | NA           | CUFF.1714  | NA           | u       | TSS5990   | 6.142E-40 |
| chr1 | TCONS_00005649 | XLOC_005614 | 41727867 | 41728079 | + | 1 | NA           | CUFF.1715  | NA           | u       | TSS5991   | 8.457E-80 |
| chr1 | TCONS_00005696 | XLOC_005655 | 42001110 | 42001315 | + | 1 | OS01G0953500 | CUFF.1722  | OS01T09535(x | TSS6036 | 0.0077427 |           |
| chr1 | TCONS_00012452 | XLOC_005664 | 42035876 | 42036084 | + | 1 | NA           | CUFF.2230  | NA           | u       | TSS6045   | 5.016E-18 |
| chr1 | TCONS_00005721 | XLOC_005684 | 42127373 | 42127647 | + | 1 | NA           | CUFF.1730  | NA           | u       | TSS6066   | 2.943E-20 |
| chr1 | TCONS_00012460 | XLOC_005724 | 42294474 | 42294725 | + | 1 | NA           | CUFF.2252  | NA           | u       | TSS6108   | 3.301E-22 |
| chr1 | TCONS_00012463 | XLOC_005745 | 42395132 | 42395610 | + | 1 | OS01G0961600 | CUFF.2277  | OS01T09616(i | TSS6131 | 1.713E-27 |           |
| chr1 | TCONS_00005784 | XLOC_005747 | 42398028 | 42398233 | + | 1 | OS01G0961600 | CUFF.1751  | OS01T09616(i | TSS6133 | 2.081E-66 |           |
| chr1 | TCONS_00005790 | XLOC_005752 | 42420566 | 42420786 | + | 1 | OS01G0962400 | CUFF.1752  | OS01T09624(i | TSS6139 | 7.835E-22 |           |
| chr1 | TCONS_00012465 | XLOC_005758 | 42450478 | 42450701 | + | 1 | OS01G0963300 | CUFF.2281  | OS01T09633(i | TSS6145 | 2.507E-09 |           |
| chr1 | TCONS_00005825 | XLOC_005788 | 42669454 | 42669703 | + | 1 | NA           | CUFF.1764  | NA           | u       | TSS6176   | 2.056E-11 |
| chr1 | TCONS_00012469 | XLOC_005805 | 42756718 | 42757017 | + | 1 | NA           | CUFF.2298  | NA           | u       | TSS6196   | 7.297E-19 |
| chr1 | TCONS_00012473 | XLOC_005839 | 43056914 | 43057120 | + | 1 | NA           | CUFF.2312  | NA           | u       | TSS6234   | 1.388E-11 |
| chr1 | TCONS_00005890 | XLOC_005850 | 43118813 | 43119018 | + | 1 | NA           | CUFF.1788  | NA           | u       | TSS6246   | 0         |
| chr1 | TCONS_00012475 | XLOC_005851 | 43126269 | 43127833 | + | 1 | NA           | CUFF.2322  | NA           | u       | TSS6247   | 0.096853  |
| chr1 | TCONS_00005902 | XLOC_005863 | 43210506 | 43210714 | + | 1 | OS01G0977600 | CUFF.1806  | OS01T09776(i | TSS6260 | 0         |           |
| chr1 | TCONS_00005927 | XLOC_005887 | 144786   | 144986   | - | 1 | NA           | CUFF.3.1   | NA           | u       | TSS6286   | 0         |
| chr1 | TCONS_00012478 | XLOC_005888 | 152179   | 152505   | - | 1 | NA           | CUFF.4.1   | NA           | u       | TSS6287   | 3.621E-10 |
| chr1 | TCONS_00012479 | XLOC_005890 | 164234   | 164487   | - | 1 | NA           | CUFF.5.1   | NA           | u       | TSS6289   | 3.129E-15 |
| chr1 | TCONS_00012480 | XLOC_005901 | 268069   | 268378   | - | 1 | OS01G0104800 | CUFF.11.1  | OS01T01048(x | TSS6301 | 2.146E-32 |           |
| chr1 | TCONS_00005949 | XLOC_005907 | 289876   | 290149   | - | 1 | OS01G0105400 | CUFF.13.1  | OS01T01054(x | TSS6308 | 0         |           |
| chr1 | TCONS_00012481 | XLOC_005912 | 322135   | 322377   | - | 1 | OS01G0106200 | CUFF.12.1  | OS01T01062(x | TSS6313 | 5.592E-20 |           |
| chr1 | TCONS_00012486 | XLOC_005932 | 479821   | 480023   | - | 1 | OS01G0108600 | CUFF.20.1  | OS01T01086(i | TSS6333 | 1.339E-23 |           |
| chr1 | TCONS_00012487 | XLOC_005966 | 740901   | 741109   | - | 1 | OS01G0113600 | CUFF.45.1  | OS01T01136(i | TSS6372 | 4.257E-36 |           |
| chr1 | TCONS_00012491 | XLOC_006038 | 1184352  | 1184621  | - | 1 | OS01G0121100 | CUFF.63.1  | OS01T01211(x | TSS6447 | 0.01177   |           |
| chr1 | TCONS_00012494 | XLOC_006099 | 1611570  | 1611771  | - | 1 | NA           | CUFF.73.1  | NA           | u       | TSS6509   | 1.508E-30 |
| chr1 | TCONS_00012496 | XLOC_006113 | 1739728  | 1740150  | - | 1 | OS01G0131300 | CUFF.85.1  | OS01T01313(x | TSS6524 | 0.36648   |           |
| chr1 | TCONS_00006189 | XLOC_006141 | 1904866  | 1905204  | - | 1 | OS01G0134700 | CUFF.90.1  | OS01T01347(x | TSS6552 | 6.629E-65 |           |
| chr1 | TCONS_00012500 | XLOC_006212 | 2415731  | 2415931  | - | 1 | NA           | CUFF.107.1 | NA           | u       | TSS6626   | 3.258E-32 |

|      |                |             |         |         |   |   |              |                          |   |         |           |
|------|----------------|-------------|---------|---------|---|---|--------------|--------------------------|---|---------|-----------|
| chr1 | TCONS_00012501 | XLOC_006215 | 2481220 | 2481592 | - | 1 | NA           | CUFF.112.1NA             | u | TSS6629 | 7.056E-24 |
| chr1 | TCONS_00006280 | XLOC_006231 | 2608465 | 2608719 | - | 1 | OS01G0148050 | CUFF.92.1 OS01T0148050(i | i | TSS6645 | 1.049E-32 |
| chr1 | TCONS_00006281 | XLOC_006232 | 2610842 | 2611044 | - | 1 | OS01G0148050 | CUFF.94.1 OS01T0148050(i | i | TSS6646 | 0         |
| chr1 | TCONS_00012505 | XLOC_006264 | 2833621 | 2833861 | - | 1 | OS01G0152600 | CUFF.131.1OS01T0152600(x | x | TSS6679 | 7.972E-26 |
| chr1 | TCONS_00006431 | XLOC_006376 | 3612192 | 3612397 | - | 1 | OS01G0170100 | CUFF.128.1OS01T0170100(x | x | TSS6799 | 1.484E-54 |
| chr1 | TCONS_00006504 | XLOC_006437 | 4065917 | 4066144 | - | 1 | OS01G0178200 | CUFF.139.1OS01T0178200(x | x | TSS6869 | 1.05E-27  |
| chr1 | TCONS_00012516 | XLOC_006452 | 4128738 | 4128946 | - | 1 | NA           | CUFF.192.1NA             | u | TSS6886 | 1.063E-19 |
| chr1 | TCONS_00012519 | XLOC_006456 | 4143213 | 4143425 | - | 1 | NA           | CUFF.194.1NA             | u | TSS6890 | 1.361E-38 |
| chr1 | TCONS_00006522 | XLOC_006458 | 4144505 | 4144777 | - | 1 | OS01G0179500 | CUFF.151.1OS01T0179500(x | x | TSS6894 | 0.0031947 |
| chr1 | TCONS_00012523 | XLOC_006495 | 4380411 | 4380614 | - | 1 | NA           | CUFF.205.1NA             | u | TSS6933 | 6.269E-37 |
| chr1 | TCONS_00012527 | XLOC_006502 | 4387030 | 4387254 | - | 1 | NA           | CUFF.208.1NA             | u | TSS6941 | 5.362E-08 |
| chr1 | TCONS_00006569 | XLOC_006506 | 4393941 | 4394168 | - | 1 | NA           | CUFF.162.1NA             | u | TSS6945 | 1.484E-54 |
| chr1 | TCONS_00006587 | XLOC_006522 | 4529066 | 4529465 | - | 1 | OS01G0185300 | CUFF.182.1OS01T0185300(i | i | TSS6964 | 0.71128   |
| chr1 | TCONS_00012530 | XLOC_006524 | 4534778 | 4535218 | - | 1 | NA           | CUFF.229.1NA             | u | TSS6966 | 1.305E-51 |
| chr1 | TCONS_00012531 | XLOC_006525 | 4539138 | 4539443 | - | 1 | OS01G0185400 | CUFF.231.1OS01T0185400(x | x | TSS6967 | 0         |
| chr1 | TCONS_00012532 | XLOC_006526 | 4543511 | 4544361 | - | 1 | OS01G0185500 | CUFF.242.1OS01T0185500(i | i | TSS6968 | 3.847E-05 |
| chr1 | TCONS_00012534 | XLOC_006544 | 4676082 | 4676557 | - | 1 | OS01G0187400 | CUFF.250.1OS01T0187400(i | i | TSS6988 | 2.863E-13 |
| chr1 | TCONS_00006665 | XLOC_006591 | 5041405 | 5041617 | - | 1 | NA           | CUFF.209.1NA             | u | TSS7038 | 1.496E-43 |
| chr1 | TCONS_00006681 | XLOC_006605 | 5226362 | 5226581 | - | 1 | NA           | CUFF.216.1NA             | u | TSS7053 | 3.192E-33 |
| chr1 | TCONS_00006707 | XLOC_006629 | 5408762 | 5409057 | - | 1 | OS01G0199900 | CUFF.223.1OS01T0199900(i | i | TSS7080 | 2.753E-12 |
| chr1 | TCONS_00006721 | XLOC_006644 | 5499449 | 5499707 | - | 1 | NA           | CUFF.222.1NA             | u | TSS7095 | 3.765E-36 |
| chr1 | TCONS_00012542 | XLOC_006698 | 5905480 | 5905710 | - | 1 | OS01G0208700 | CUFF.309.1OS01T0208700(i | i | TSS7153 | 0.01177   |
| chr1 | TCONS_00006808 | XLOC_006732 | 6128544 | 6128785 | - | 1 | OS01G0212100 | CUFF.244.1OS01T0212100(i | i | TSS7188 | 7.74E-10  |
| chr1 | TCONS_00012548 | XLOC_006733 | 6135337 | 6135721 | - | 1 | OS01G0212400 | CUFF.318.1OS01T0212400(i | i | TSS7189 | 1.387E-18 |
| chr1 | TCONS_00012549 | XLOC_006737 | 6181463 | 6181690 | - | 1 | NA           | CUFF.307.1NA             | u | TSS7193 | 2.248E-36 |
| chr1 | TCONS_00012556 | XLOC_006767 | 6445076 | 6445390 | - | 1 | NA           | CUFF.319.1NA             | u | TSS7224 | 0.11244   |
| chr1 | TCONS_00012559 | XLOC_006771 | 6449467 | 6449839 | - | 1 | NA           | CUFF.320.1NA             | u | TSS7230 | 4.293E-21 |
| chr1 | TCONS_00012563 | XLOC_006797 | 6655770 | 6655975 | - | 1 | NA           | CUFF.341.1NA             | u | TSS7258 | 2.638E-18 |
| chr1 | TCONS_00006884 | XLOC_006809 | 6714063 | 6714291 | - | 1 | OS01G0222800 | CUFF.268.1OS01T0222800(x | x | TSS7272 | 2.58E-41  |
| chr1 | TCONS_00006929 | XLOC_006851 | 7045302 | 7045523 | - | 1 | OS01G0227300 | CUFF.286.1OS01T0227300(i | i | TSS7315 | 1.05E-27  |
| chr1 | TCONS_00012571 | XLOC_006883 | 7267966 | 7268441 | - | 1 | OS01G0231500 | CUFF.406.1OS01T0231500(i | i | TSS7348 | 1.136E-14 |
| chr1 | TCONS_00012575 | XLOC_006891 | 7294745 | 7294946 | - | 1 | NA           | CUFF.379.1NA             | u | TSS7356 | 6.268E-22 |
| chr1 | TCONS_00007028 | XLOC_006950 | 7714444 | 7714666 | - | 1 | OS01G0239100 | CUFF.317.1OS01T0239100(x | x | TSS7423 | 2.144E-28 |
| chr1 | TCONS_00007083 | XLOC_007005 | 8084542 | 8084922 | - | 1 | OS01G0246700 | CUFF.326.1OS01T0246700(x | x | TSS7479 | 0         |
| chr1 | TCONS_00012587 | XLOC_007018 | 8161241 | 8161468 | - | 1 | OS01G0248300 | CUFF.423.1OS01T0248300(x | x | TSS7492 | 3.396E-42 |

|      |                |             |          |          |   |   |              |                        |   |         |           |
|------|----------------|-------------|----------|----------|---|---|--------------|------------------------|---|---------|-----------|
| chr1 | TCONS_00007145 | XLOC_007068 | 8489647  | 8489847  | - | 1 | NA           | CUFF.338.1NA           | u | TSS7543 | 2.065E-44 |
| chr1 | TCONS_00012592 | XLOC_007069 | 8504491  | 8504694  | - | 1 | NA           | CUFF.442.1NA           | u | TSS7544 | 2.638E-18 |
| chr1 | TCONS_00007150 | XLOC_007074 | 8541977  | 8542202  | - | 1 | OS01G0256400 | CUFF.336.1OS01T02564(i |   | TSS7549 | 4.042E-30 |
| chr1 | TCONS_00012596 | XLOC_007110 | 8772239  | 8772725  | - | 1 | OS01G0260800 | CUFF.457.1OS01T02608(i |   | TSS7586 | 2.216E-26 |
| chr1 | TCONS_00007202 | XLOC_007129 | 8947821  | 8948078  | - | 1 | OS01G0263600 | CUFF.355.1OS01T02636(i |   | TSS7606 | 2.943E-20 |
| chr1 | TCONS_00007208 | XLOC_007135 | 8989937  | 8990175  | - | 1 | OS01G0264500 | CUFF.357.1OS01T02645(i |   | TSS7613 | 1.441E-28 |
| chr1 | TCONS_00007239 | XLOC_007168 | 9250527  | 9250752  | - | 1 | OS01G0268600 | CUFF.373.1OS01T02686(i |   | TSS7649 | 1.611E-42 |
| chr1 | TCONS_00012606 | XLOC_007171 | 9261469  | 9261815  | - | 1 | NCRNA_35330  | CUFF.494.1NCRNA_353:x  |   | TSS7652 | 1.959E-24 |
| chr1 | TCONS_00007254 | XLOC_007186 | 9389591  | 9389812  | - | 1 | OS01G0271500 | CUFF.378.1OS01T02715(i |   | TSS7667 | 4.56E-44  |
| chr1 | TCONS_00012610 | XLOC_007198 | 9465588  | 9466756  | - | 1 | NA           | CUFF.496.1NA           | u | TSS7680 | 0.000553  |
| chr1 | TCONS_00012617 | XLOC_007252 | 9885962  | 9886169  | - | 1 | NA           | CUFF.508.1NA           | u | TSS7740 | 1.063E-19 |
| chr1 | TCONS_00007327 | XLOC_007256 | 9933301  | 9933525  | - | 1 | OS01G0279900 | CUFF.392.1OS01T02799(i |   | TSS7744 | 1.33E-29  |
| chr1 | TCONS_00012618 | XLOC_007260 | 9973963  | 9974239  | - | 1 | NCRNA_1217   | CUFF.517.1NCRNA_121'x  |   | TSS7748 | 7.187E-39 |
| chr1 | TCONS_00012619 | XLOC_007274 | 10119910 | 10120183 | - | 1 | OS01G0283100 | CUFF.547.1OS01T02831(i |   | TSS7763 | 1.19E-21  |
| chr1 | TCONS_00007366 | XLOC_007297 | 10313582 | 10313793 | - | 1 | OS01G0286900 | CUFF.410.1OS01T02869(x |   | TSS7786 | 0         |
| chr1 | TCONS_00012623 | XLOC_007298 | 10313846 | 10314283 | - | 1 | OS01G0286900 | CUFF.540.1OS01T02869(x |   | TSS7787 | 1.043E-12 |
| chr1 | TCONS_00012625 | XLOC_007312 | 10471158 | 10471366 | - | 1 | OS01G0289600 | CUFF.548.1OS01T02896(x |   | TSS7802 | 0.0012761 |
| chr1 | TCONS_00012629 | XLOC_007334 | 10624800 | 10625054 | - | 1 | OS01G0292200 | CUFF.564.1OS01T02922(x |   | TSS7827 | 1.153E-72 |
| chr1 | TCONS_00012630 | XLOC_007351 | 10823127 | 10823347 | - | 1 | OS01G0296100 | CUFF.580.1OS01T02961(i |   | TSS7845 | 4.766E-28 |
| chr1 | TCONS_00012636 | XLOC_007374 | 11018643 | 11018845 | - | 1 | NA           | CUFF.572.1NA           | u | TSS7868 | 1.326E-28 |
| chr1 | TCONS_00012638 | XLOC_007387 | 11169800 | 11170001 | - | 1 | NCRNA_35976  | CUFF.584.1NCRNA_359'x  |   | TSS7882 | 6.57E-17  |
| chr1 | TCONS_00007454 | XLOC_007392 | 11195254 | 11195498 | - | 1 | NA           | CUFF.434.1NA           | u | TSS7887 | 3.854E-21 |
| chr1 | TCONS_00012639 | XLOC_007394 | 11213211 | 11213593 | - | 1 | OS01G0303200 | CUFF.586.1OS01T03032(x |   | TSS7889 | 2.859E-30 |
| chr1 | TCONS_00007468 | XLOC_007407 | 11317613 | 11318652 | - | 1 | OS01G0305300 | CUFF.447.1OS01T03053(x |   | TSS7902 | 1.839E-35 |
| chr1 | TCONS_00012648 | XLOC_007509 | 12267759 | 12267959 | - | 1 | OS01G0321800 | CUFF.624.1OS01T03218(i |   | TSS8007 | 1.512E-25 |
| chr1 | TCONS_00007587 | XLOC_007528 | 12396049 | 12396412 | - | 1 | NA           | CUFF.469.1NA           | u | TSS8027 | 2.862E-09 |
| chr1 | TCONS_00007588 | XLOC_007529 | 12397108 | 12397330 | - | 1 | NA           | CUFF.468.1NA           | u | TSS8028 | 1.837E-16 |
| chr1 | TCONS_00012652 | XLOC_007542 | 12566015 | 12566293 | - | 1 | OS01G0327100 | CUFF.634.1OS01T03271(x |   | TSS8042 | 3.31E-37  |
| chr1 | TCONS_00007602 | XLOC_007543 | 12566915 | 12567124 | - | 1 | OS01G0327100 | CUFF.479.1OS01T03271(x |   | TSS8043 | 6.529E-34 |
| chr1 | TCONS_00007624 | XLOC_007566 | 12752857 | 12753244 | - | 1 | NA           | CUFF.483.1NA           | u | TSS8067 | 0         |
| chr1 | TCONS_00007665 | XLOC_007601 | 13239767 | 13239976 | - | 1 | OS01G0337500 | CUFF.492.1OS01T03375(i |   | TSS8108 | 0         |
| chr1 | TCONS_00007673 | XLOC_007606 | 13267380 | 13267719 | - | 1 | OS01G0337700 | CUFF.490.1OS01T03377(x |   | TSS8114 | 1.979E-29 |
| chr1 | TCONS_00007676 | XLOC_007608 | 13303547 | 13303747 | - | 1 | OS01G0338200 | CUFF.503.1OS01T03382(i |   | TSS8117 | 2.182E-71 |
| chr1 | TCONS_00007677 | XLOC_007609 | 13307139 | 13307375 | - | 1 | NA           | CUFF.493.1NA           | u | TSS8118 | 2.741E-25 |
| chr1 | TCONS_00012658 | XLOC_007630 | 13501317 | 13501517 | - | 1 | OS01G0341750 | CUFF.669.1OS01T03417'i |   | TSS8139 | 6.994E-29 |



|      |                |             |          |          |   |   |              |            |              |         |                   |
|------|----------------|-------------|----------|----------|---|---|--------------|------------|--------------|---------|-------------------|
| chr1 | TCONS_00007759 | XLOC_007691 | 14016154 | 14016399 | - | 1 | OS01G0350900 | CUFF.533.1 | OS01T03509(i | TSS8205 | 1.121E-17         |
| chr1 | TCONS_00007792 | XLOC_007726 | 14306828 | 14307466 | - | 1 | NA           | CUFF.523.1 | NA           | u       | TSS8241 7.692E-05 |
| chr1 | TCONS_00012667 | XLOC_007726 | 14306674 | 14307125 | - | 1 | NA           | CUFF.683.1 | NA           | u       | TSS8240 3.748E-52 |
| chr1 | TCONS_00012668 | XLOC_007726 | 14307413 | 14307622 | - | 1 | NA           | CUFF.682.1 | NA           | u       | TSS8242 0.005791  |
| chr1 | TCONS_00007793 | XLOC_007727 | 14307735 | 14308137 | - | 1 | NA           | CUFF.524.1 | NA           | u       | TSS8243 6.775E-44 |
| chr1 | TCONS_00012670 | XLOC_007784 | 14801232 | 14801498 | - | 1 | OS01G0363500 | CUFF.714.1 | OS01T03635(i | TSS8302 | 3.301E-22         |
| chr1 | TCONS_00007881 | XLOC_007806 | 15065461 | 15065673 | - | 1 | OS01G0367700 | CUFF.553.1 | OS01T03677(i | TSS8326 | 1.279E-73         |
| chr1 | TCONS_00007894 | XLOC_007819 | 15164805 | 15165039 | - | 1 | OS01G0369600 | CUFF.552.1 | OS01T03696(i | TSS8340 | 2.178E-23         |
| chr1 | TCONS_00012675 | XLOC_007902 | 16050134 | 16050459 | - | 1 | OS01G0383700 | CUFF.779.1 | OS01T03837(i | TSS8423 | 6.222E-68         |
| chr1 | TCONS_00012676 | XLOC_007903 | 16051199 | 16051805 | - | 1 | OS01G0383700 | CUFF.791.1 | OS01T03837(i | TSS8424 | 5.463E-13         |
| chr1 | TCONS_00012677 | XLOC_007904 | 16055178 | 16055673 | - | 1 | OS01G0383700 | CUFF.770.1 | OS01T03837(i | TSS8425 | 1.615E-58         |
| chr1 | TCONS_00007995 | XLOC_007921 | 16227795 | 16228012 | - | 1 | OS01G0386600 | CUFF.575.1 | OS01T03866(x | TSS8443 | 7E-60             |
| chr1 | TCONS_00007997 | XLOC_007923 | 16232737 | 16232959 | - | 1 | OS01G0386700 | CUFF.577.1 | OS01T03867(i | TSS8445 | 0                 |
| chr1 | TCONS_00007998 | XLOC_007924 | 16234755 | 16234974 | - | 1 | NA           | CUFF.574.1 | NA           | u       | TSS8446 6.863E-19 |
| chr1 | TCONS_00012679 | XLOC_007940 | 16368054 | 16368279 | - | 1 | NA           | CUFF.747.1 | NA           | u       | TSS8462 0.0001868 |
| chr1 | TCONS_00008015 | XLOC_007944 | 16378925 | 16379422 | - | 1 | NA           | CUFF.579.1 | NA           | u       | TSS8466 0.0006636 |
| chr1 | TCONS_00008017 | XLOC_007946 | 16381049 | 16381786 | - | 1 | NA           | CUFF.592.1 | NA           | u       | TSS8468 0.26713   |
| chr1 | TCONS_00012687 | XLOC_007952 | 16387659 | 16388065 | - | 1 | OS01G0388500 | CUFF.759.1 | OS01T03885(i | TSS8476 | 3.414E-08         |
| chr1 | TCONS_00012688 | XLOC_007953 | 16389528 | 16389809 | - | 1 | NA           | CUFF.768.1 | NA           | u       | TSS8477 3.249E-27 |
| chr1 | TCONS_00008030 | XLOC_007960 | 16490248 | 16490608 | - | 1 | OS01G0390400 | CUFF.600.1 | OS01T03904(i | TSS8489 | 1.842E-25         |
| chr1 | TCONS_00012692 | XLOC_007962 | 16498956 | 16499214 | - | 1 | OS01G0390600 | CUFF.766.1 | OS01T03906(i | TSS8491 | 4.766E-28         |
| chr1 | TCONS_00012693 | XLOC_007970 | 16595515 | 16595886 | - | 1 | OS01G0391500 | CUFF.767.1 | OS01T03915(x | TSS8501 | 7.264E-12         |
| chr1 | TCONS_00012694 | XLOC_007977 | 16694354 | 16694641 | - | 1 | OS01G0392600 | CUFF.802.1 | OS01T03926(i | TSS8510 | 1.051E-25         |
| chr1 | TCONS_00012698 | XLOC_008012 | 17151804 | 17152462 | - | 1 | NA           | CUFF.778.1 | NA           | u       | TSS8546 6.743E-13 |
| chr1 | TCONS_00008085 | XLOC_008014 | 17153759 | 17153982 | - | 1 | NA           | CUFF.602.1 | NA           | u       | TSS8550 4.743E-05 |
| chr1 | TCONS_00012700 | XLOC_008017 | 17179336 | 17179953 | - | 1 | OS01G0498802 | CUFF.789.1 | OS01T04988(x | TSS8553 | 3.694E-20         |
| chr1 | TCONS_00012705 | XLOC_008023 | 17197183 | 17197452 | - | 1 | NA           | CUFF.785.1 | NA           | u       | TSS8559 2.529E-33 |
| chr1 | TCONS_00008090 | XLOC_008024 | 17200556 | 17200757 | - | 1 | NA           | CUFF.608.1 | NA           | u       | TSS8560 0         |
| chr1 | TCONS_00008104 | XLOC_008038 | 17303826 | 17304061 | - | 1 | OS01G0500825 | CUFF.615.1 | OS01T05008(x | TSS8575 | 2.272E-18         |
| chr1 | TCONS_00012707 | XLOC_008039 | 17304517 | 17304938 | - | 1 | OS01G0500825 | CUFF.804.1 | OS01T05008(i | TSS8576 | 1.307E-09         |
| chr1 | TCONS_00008151 | XLOC_008077 | 17683043 | 17683395 | - | 1 | OS01G0507000 | CUFF.621.1 | OS01T05070(x | TSS8616 | 1.144E-07         |
| chr1 | TCONS_00012709 | XLOC_008078 | 17685286 | 17685524 | - | 1 | NCRNA_8535   | CUFF.805.1 | NCRNA_853(x  | TSS8617 | 6.994E-29         |
| chr1 | TCONS_00012711 | XLOC_008086 | 17751646 | 17751863 | - | 1 | OS01G0507900 | CUFF.808.1 | OS01T05079(x | TSS8625 | 3.405E-06         |
| chr1 | TCONS_00008170 | XLOC_008099 | 17908451 | 17909424 | - | 1 | MEK1         | CUFF.650.1 | OS01T05101(i | TSS8638 | 5.813E-33         |
| chr1 | TCONS_00008175 | XLOC_008105 | 17937767 | 17938008 | - | 1 | NA           | CUFF.622.1 | NA           | u       | TSS8645 8.551E-21 |

|      |                |             |          |          |   |   |              |            |               |         |                   |
|------|----------------|-------------|----------|----------|---|---|--------------|------------|---------------|---------|-------------------|
| chr1 | TCONS_00012717 | XLOC_008146 | 18164880 | 18165250 | - | 1 | OS01G0514300 | CUFF.839.1 | OS01T051430(i | TSS8691 | 1.136E-14         |
| chr1 | TCONS_00012726 | XLOC_008202 | 18628465 | 18628784 | - | 1 | NA           | CUFF.856.1 | NA            | u       | TSS8750 4.67E-51  |
| chr1 | TCONS_00008272 | XLOC_008203 | 18629179 | 18629530 | - | 1 | NA           | CUFF.651.1 | NA            | u       | TSS8751 3.33E-46  |
| chr1 | TCONS_00008274 | XLOC_008205 | 18631264 | 18631502 | - | 1 | NA           | CUFF.653.1 | NA            | u       | TSS8753 5.052E-48 |
| chr1 | TCONS_00012728 | XLOC_008207 | 18643485 | 18643690 | - | 1 | NA           | CUFF.858.1 | NA            | u       | TSS8755 2.638E-18 |
| chr1 | TCONS_00012730 | XLOC_008214 | 18688273 | 18688511 | - | 1 | NA           | CUFF.868.1 | NA            | u       | TSS8762 1.931E-13 |
| chr1 | TCONS_00012732 | XLOC_008219 | 18772569 | 18772923 | - | 1 | OS01G0524700 | CUFF.881.1 | OS01T05247(i  | TSS8767 | 4.293E-21         |
| chr1 | TCONS_00012733 | XLOC_008235 | 18937872 | 18938193 | - | 1 | OS01G0527400 | CUFF.888.1 | OS01T05274(i  | TSS8783 | 2.514E-28         |
| chr1 | TCONS_00008306 | XLOC_008244 | 19010746 | 19011003 | - | 1 | OS01G0528800 | CUFF.672.1 | OS01T05288(i  | TSS8792 | 9.642E-50         |
| chr1 | TCONS_00012736 | XLOC_008251 | 19088089 | 19088290 | - | 1 | OS01G0530366 | CUFF.884.1 | OS01T05303(x  | TSS8799 | 1.527E-35         |
| chr1 | TCONS_00008354 | XLOC_008293 | 19352661 | 19352872 | - | 1 | OS01G0533900 | CUFF.689.1 | OS01T05339(x  | TSS8842 | 1.578E-37         |
| chr1 | TCONS_00012739 | XLOC_008301 | 19439472 | 19439673 | - | 1 | NA           | CUFF.899.1 | NA            | u       | TSS8850 3.311E-37 |
| chr1 | TCONS_00008382 | XLOC_008321 | 19685173 | 19685465 | - | 1 | OS01G0538000 | CUFF.700.1 | OS01T05380(i  | TSS8870 | 0                 |
| chr1 | TCONS_00008412 | XLOC_008350 | 20033654 | 20034161 | - | 1 | NA           | CUFF.699.1 | NA            | u       | TSS8899 7.27E-25  |
| chr1 | TCONS_00012740 | XLOC_008382 | 20325226 | 20325463 | - | 1 | OS01G0546900 | CUFF.919.1 | OS01T05469(i  | TSS8931 | 6.268E-22         |
| chr1 | TCONS_00012741 | XLOC_008384 | 20333018 | 20333358 | - | 1 | OS01G0547000 | CUFF.920.1 | OS01T05470(x  | TSS8933 | 8.155E-21         |
| chr1 | TCONS_00012747 | XLOC_008445 | 20850155 | 20850611 | - | 1 | NA           | CUFF.936.1 | NA            | u       | TSS8999 2.303E-41 |
| chr1 | TCONS_00012750 | XLOC_008448 | 20856441 | 20856939 | - | 1 | NA           | CUFF.938.1 | NA            | u       | TSS9002 1.19E-21  |
| chr1 | TCONS_00012755 | XLOC_008477 | 21121360 | 21121626 | - | 1 | OS01G0558200 | CUFF.949.1 | OS01T05582(x  | TSS9031 | 1.033E-24         |
| chr1 | TCONS_00008548 | XLOC_008484 | 21162802 | 21163145 | - | 1 | NA           | CUFF.732.1 | NA            | u       | TSS9040 1.827E-30 |
| chr1 | TCONS_00008549 | XLOC_008485 | 21163736 | 21163965 | - | 1 | NA           | CUFF.731.1 | NA            | u       | TSS9041 6.604E-06 |
| chr1 | TCONS_00008553 | XLOC_008491 | 21177814 | 21178032 | - | 1 | OS01G0559100 | CUFF.738.1 | OS01T05591(x  | TSS9048 | 3.935E-46         |
| chr1 | TCONS_00008558 | XLOC_008497 | 21243305 | 21243640 | - | 1 | NA           | CUFF.739.1 | NA            | u       | TSS9054 6.15E-12  |
| chr1 | TCONS_00012762 | XLOC_008510 | 21387462 | 21387667 | - | 1 | OS01G0562400 | CUFF.966.1 | OS01T05624(i  | TSS9067 | 5.961E-15         |
| chr1 | TCONS_00008574 | XLOC_008513 | 21417321 | 21417534 | - | 1 | OS01G0563000 | CUFF.756.1 | OS01T05630(i  | TSS9070 | 2.128E-49         |
| chr1 | TCONS_00008636 | XLOC_008565 | 21893363 | 21894011 | - | 1 | NA           | CUFF.757.1 | NA            | u       | TSS9132 0.0001622 |
| chr1 | TCONS_00012765 | XLOC_008567 | 21896064 | 21896711 | - | 1 | CARB         | CUFF.987.1 | OS01T05707(x  | TSS9134 | 0                 |
| chr1 | TCONS_00008647 | XLOC_008574 | 21936320 | 21936562 | - | 1 | NA           | CUFF.763.1 | NA            | u       | TSS9143 2.588E-21 |
| chr1 | TCONS_00008674 | XLOC_008600 | 22085605 | 22085814 | - | 1 | FTSH5        | CUFF.774.1 | OS01T05745(x  | TSS9170 | 7.86E-42          |
| chr1 | TCONS_00008713 | XLOC_008638 | 22379800 | 22380065 | - | 1 | OS01G0578700 | CUFF.778.1 | OS01T05787(i  | TSS9208 | 4.606E-19         |
| chr1 | TCONS_00012772 | XLOC_008679 | 22676696 | 22677065 | - | 1 | OS01G0584032 | CUFF.1028  | OS01T05840(i  | TSS9251 | 9.712E-11         |
| chr1 | TCONS_00012775 | XLOC_008684 | 22716379 | 22716617 | - | 1 | NA           | CUFF.1012  | NA            | u       | TSS9256 4.824E-23 |
| chr1 | TCONS_00012782 | XLOC_008694 | 22723941 | 22724675 | - | 1 | NA           | CUFF.1025  | NA            | u       | TSS9266 8.626E-16 |
| chr1 | TCONS_00008764 | XLOC_008699 | 22727184 | 22727390 | - | 1 | OS01G0584800 | CUFF.798.1 | OS01T05848(i  | TSS9271 | 0                 |
| chr1 | TCONS_00012785 | XLOC_008701 | 22744959 | 22745448 | - | 1 | OS01G0585100 | CUFF.1037  | OS01T05851(i  | TSS9273 | 7.048E-34         |

|      |                |             |          |          |   |   |              |                        |   |         |           |
|------|----------------|-------------|----------|----------|---|---|--------------|------------------------|---|---------|-----------|
| chr1 | TCONS_00012789 | XLOC_008708 | 22776111 | 22776580 | - | 1 | NA           | CUFF.1035 NA           | u | TSS9281 | 1.326E-28 |
| chr1 | TCONS_00012793 | XLOC_008721 | 22905790 | 22906047 | - | 1 | NA           | CUFF.1042 NA           | u | TSS9295 | 3.907E-44 |
| chr1 | TCONS_00012794 | XLOC_008722 | 22907736 | 22907978 | - | 1 | OS01G0588100 | CUFF.1045 OS01T05881(x |   | TSS9296 | 3.995E-62 |
| chr1 | TCONS_00012802 | XLOC_008762 | 23198667 | 23198867 | - | 1 | NA           | CUFF.1060 NA           | u | TSS9336 | 7.056E-24 |
| chr1 | TCONS_00008820 | XLOC_008767 | 23203733 | 23203940 | - | 1 | NA           | CUFF.814.1NA           | u | TSS9341 | 6.217E-73 |
| chr1 | TCONS_00012808 | XLOC_008769 | 23205389 | 23205618 | - | 1 | NCRNA_5462   | CUFF.1069 NCRNA_546(x  |   | TSS9343 | 1.501E-13 |
| chr1 | TCONS_00012812 | XLOC_008790 | 23337349 | 23337567 | - | 1 | NA           | CUFF.1079 NA           | u | TSS9364 | 6.268E-22 |
| chr1 | TCONS_00012818 | XLOC_008900 | 24256713 | 24257300 | - | 1 | OS01G0612200 | CUFF.1114 OS01T06122(i |   | TSS9479 | 3.839E-19 |
| chr1 | TCONS_00012819 | XLOC_008904 | 24278565 | 24278832 | - | 1 | OS01G0612500 | CUFF.1110 OS01T06125(i |   | TSS9483 | 3.249E-27 |
| chr1 | TCONS_00008966 | XLOC_008914 | 24317069 | 24317304 | - | 1 | OS01G0612900 | CUFF.849.1OS01T06129(x |   | TSS9493 | 0         |
| chr1 | TCONS_00012821 | XLOC_008926 | 24378687 | 24378890 | - | 1 | OS01G0614700 | CUFF.1120 OS01T06147(x |   | TSS9507 | 2.638E-18 |
| chr1 | TCONS_00009022 | XLOC_008964 | 24615786 | 24616036 | - | 1 | NCRNA_1580   | CUFF.879.1NCRNA_158(x  |   | TSS9548 | 0         |
| chr1 | TCONS_00012825 | XLOC_008988 | 24793405 | 24793636 | - | 1 | OS01G0621700 | CUFF.1146 OS01T06217(i |   | TSS9572 | 1.527E-35 |
| chr1 | TCONS_00012826 | XLOC_008990 | 24809584 | 24809864 | - | 1 | OS01G0621900 | CUFF.1167 OS01T06219(i |   | TSS9574 | 1.339E-23 |
| chr1 | TCONS_00012827 | XLOC_009008 | 24937723 | 24937955 | - | 1 | NA           | CUFF.1155 NA           | u | TSS9592 | 6.673E-21 |
| chr1 | TCONS_00009084 | XLOC_009029 | 25002554 | 25002785 | - | 1 | OS01G0626200 | CUFF.1170 OS01T06262(x |   | TSS9615 | 1.066E-57 |
| chr1 | TCONS_00012839 | XLOC_009039 | 25042432 | 25042633 | - | 1 | OS01G0627400 | CUFF.1176 OS01T06274(x |   | TSS9628 | 1.387E-18 |
| chr1 | TCONS_00009101 | XLOC_009047 | 25134287 | 25134527 | - | 1 | OS01G0629400 | CUFF.896.1OS01T06294(i |   | TSS9636 | 1.561E-32 |
| chr1 | TCONS_00009102 | XLOC_009048 | 25135801 | 25136115 | - | 1 | OS01G0629400 | CUFF.894.1OS01T06294(x |   | TSS9637 | 1.772E-74 |
| chr1 | TCONS_00009119 | XLOC_009066 | 25320366 | 25320583 | - | 1 | NA           | CUFF.892.1NA           | u | TSS9655 | 1.864E-79 |
| chr1 | TCONS_00012844 | XLOC_009073 | 25354321 | 25354896 | - | 1 | OS01G0633100 | CUFF.1185 OS01T06331(i |   | TSS9662 | 2.638E-18 |
| chr1 | TCONS_00009162 | XLOC_009113 | 25701048 | 25701469 | - | 1 | OS01G0639900 | CUFF.931.1OS01T06399(i |   | TSS9702 | 0         |
| chr1 | TCONS_00012849 | XLOC_009128 | 25790891 | 25791351 | - | 1 | OS01G0641800 | CUFF.1202 OS01T06418(x |   | TSS9717 | 8.847E-32 |
| chr1 | TCONS_00012850 | XLOC_009162 | 26109445 | 26109719 | - | 1 | OS01G0647700 | CUFF.1209 OS01T06477(x |   | TSS9755 | 3.129E-15 |
| chr1 | TCONS_00009213 | XLOC_009163 | 26110256 | 26110478 | - | 1 | OS01G0647700 | CUFF.918.1OS01T06477(x |   | TSS9756 | 8.942E-30 |
| chr1 | TCONS_00012852 | XLOC_009174 | 26187412 | 26187734 | - | 1 | OS01G0649000 | CUFF.1213 OS01T06490(i |   | TSS9767 | 9.09E-07  |
| chr1 | TCONS_00012853 | XLOC_009177 | 26198187 | 26198391 | - | 1 | NA           | CUFF.1210 NA           | u | TSS9770 | 1.388E-11 |
| chr1 | TCONS_00012855 | XLOC_009188 | 26251977 | 26252345 | - | 1 | OS01G0650200 | CUFF.1229 OS01T06502(i |   | TSS9782 | 3.926E-12 |
| chr1 | TCONS_00012856 | XLOC_009189 | 26265524 | 26265886 | - | 1 | OS01G0650200 | CUFF.1231 OS01T06502(i |   | TSS9783 | 1.25E-16  |
| chr1 | TCONS_00012857 | XLOC_009190 | 26269726 | 26269927 | - | 1 | OS01G0650200 | CUFF.1232 OS01T06502(i |   | TSS9784 | 7.187E-39 |
| chr1 | TCONS_00009274 | XLOC_009223 | 26515847 | 26516047 | - | 1 | OS01G0654100 | CUFF.934.1OS01T06541(x |   | TSS9820 | 7.665E-20 |
| chr1 | TCONS_00012859 | XLOC_009224 | 26516687 | 26516933 | - | 1 | OS01G0654100 | CUFF.1237 OS01T06541(x |   | TSS9821 | 1.168E-26 |
| chr1 | TCONS_00012860 | XLOC_009226 | 26527514 | 26527726 | - | 1 | NA           | CUFF.1224 NA           | u | TSS9823 | 2.165E-14 |
| chr1 | TCONS_00009278 | XLOC_009229 | 26529765 | 26529970 | - | 1 | NA           | CUFF.929.1NA           | u | TSS9826 | 7.311E-65 |
| chr1 | TCONS_00012863 | XLOC_009240 | 26613901 | 26614312 | - | 1 | OS01G0655500 | CUFF.1704 OS01T06555(i |   | TSS9838 | 1.25E-16  |

|      |                |             |          |          |   |   |              |            |              |         |           |           |
|------|----------------|-------------|----------|----------|---|---|--------------|------------|--------------|---------|-----------|-----------|
| chr1 | TCONS_00009292 | XLOC_009244 | 26636837 | 26637102 | - | 1 | OS01G0655800 | CUFF.940.1 | OS01T06558(x | TSS9842 | 0         |           |
| chr1 | TCONS_00009330 | XLOC_009280 | 26915438 | 26915644 | - | 1 | OS01G0660550 | CUFF.947.1 | OS01T06605(i | TSS9881 | 0         |           |
| chr1 | TCONS_00012867 | XLOC_009289 | 27010749 | 27011178 | - | 1 | OS01G0661500 | CUFF.1729  | OS01T06615(i | TSS9890 | 9.541E-18 |           |
| chr1 | TCONS_00009352 | XLOC_009302 | 27095568 | 27095783 | - | 1 | OS01G0663500 | CUFF.949.1 | OS01T06635(x | TSS9904 | 2.144E-28 |           |
| chr1 | TCONS_00009365 | XLOC_009314 | 27187988 | 27188209 | - | 1 | NCRNA_43760  | CUFF.955.1 | NCRNA_437(x  | TSS9917 | 2.943E-29 |           |
| chr1 | TCONS_00009405 | XLOC_009353 | 27412404 | 27412638 | - | 1 | NA           | CUFF.967.1 | NA           | u       | TSS9958   | 1.827E-30 |
| chr1 | TCONS_00012879 | XLOC_009382 | 27601859 | 27602112 | - | 1 | DI19-3       | CUFF.1266  | OS01T06724(x | TSS9987 | 3.721E-34 |           |
| chr1 | TCONS_00012883 | XLOC_009415 | 27779330 | 27779584 | - | 1 | IAA5         | CUFF.1284  | OS01T06757(i | TSS1002 | 4.215E-54 |           |
| chr1 | TCONS_00009504 | XLOC_009448 | 28020637 | 28020867 | - | 1 | OS01G0680700 | CUFF.1008  | OS01T06807(i | TSS1006 | 1.135E-31 |           |
| chr1 | TCONS_00012890 | XLOC_009482 | 28250039 | 28250273 | - | 1 | NA           | CUFF.1297  | NA           | u       | TSS1009   | 0.01177   |
| chr1 | TCONS_00009547 | XLOC_009495 | 28332693 | 28332902 | - | 1 | RACK1A       | CUFF.1034  | OS01T06868(i | TSS1010 | 2.321E-32 |           |
| chr1 | TCONS_00012898 | XLOC_009521 | 28514744 | 28515090 | - | 1 | OS01G0690600 | CUFF.1340  | OS01T06906(i | TSS1013 | 3.713E-41 |           |
| chr1 | TCONS_00012899 | XLOC_009522 | 28525653 | 28525969 | - | 1 | OS01G0690800 | CUFF.1351  | OS01T06908(i | TSS1013 | 1.326E-28 |           |
| chr1 | TCONS_00009578 | XLOC_009524 | 28526960 | 28527311 | - | 1 | OS01G0690800 | CUFF.1114  | OS01T06908(i | TSS1014 | 3.082E-56 |           |
| chr1 | TCONS_00012901 | XLOC_009552 | 28733644 | 28733844 | - | 1 | OS01G0694900 | CUFF.1352  | OS01T06949(i | TSS1017 | 3.249E-27 |           |
| chr1 | TCONS_00012902 | XLOC_009560 | 28772302 | 28772719 | - | 1 | OS01G0695700 | CUFF.1356  | OS01T06957(x | TSS1017 | 3.453E-17 |           |
| chr1 | TCONS_00009643 | XLOC_009583 | 28886357 | 28886565 | - | 1 | OS01G0698100 | CUFF.1067  | OS01T06981(i | TSS1020 | 0         |           |
| chr1 | TCONS_00012904 | XLOC_009584 | 28887082 | 28887487 | - | 1 | OS01G0698100 | CUFF.1364  | OS01T06981(i | TSS1020 | 9.158E-23 |           |
| chr1 | TCONS_00009702 | XLOC_009642 | 29307204 | 29307458 | - | 1 | OS01G0706400 | CUFF.1091  | OS01T07064(i | TSS1026 | 2.643E-57 |           |
| chr1 | TCONS_00009716 | XLOC_009655 | 29424988 | 29425205 | - | 1 | OS01G0708300 | CUFF.1082  | OS01T07083(x | TSS1027 | 3.534E-22 |           |
| chr1 | TCONS_00009719 | XLOC_009658 | 29432566 | 29432767 | - | 1 | OS01G0708350 | CUFF.1095  | OS01T07083(i | TSS1028 | 2.253E-82 |           |
| chr1 | TCONS_00012912 | XLOC_009660 | 29435762 | 29436180 | - | 1 | OS01G0708400 | CUFF.1384  | OS01T07084(x | TSS1028 | 2.236E-35 |           |
| chr1 | TCONS_00009748 | XLOC_009688 | 29562925 | 29563169 | - | 1 | NA           | CUFF.1089  | NA           | u       | TSS1031   | 1.594E-22 |
| chr1 | TCONS_00012926 | XLOC_009745 | 29989713 | 29990024 | - | 1 | OS01G0719300 | CUFF.1445  | OS01T07193(x | TSS1037 | 3.69E-29  |           |
| chr1 | TCONS_00012929 | XLOC_009769 | 30118673 | 30118893 | - | 1 | NA           | CUFF.1456  | NA           | u       | TSS1040   | 8.639E-20 |
| chr1 | TCONS_00009855 | XLOC_009787 | 30259561 | 30259773 | - | 1 | OS01G0725800 | CUFF.1142  | OS01T07258(i | TSS1042 | 2.953E-34 |           |
| chr1 | TCONS_00012936 | XLOC_009795 | 30298972 | 30299361 | - | 1 | OS01G0726801 | CUFF.1462  | OS01T07268(x | TSS1042 | 3.839E-19 |           |
| chr1 | TCONS_00012937 | XLOC_009808 | 30380557 | 30380776 | - | 1 | OS01G0728375 | CUFF.1473  | OS01T07283(x | TSS1044 | 3.047E-45 |           |
| chr1 | TCONS_00009885 | XLOC_009822 | 30463446 | 30463682 | - | 1 | OS01G0730300 | CUFF.1160  | OS01T07303(i | TSS1045 | 5.588E-26 |           |
| chr1 | TCONS_00009917 | XLOC_009853 | 30605584 | 30605784 | - | 1 | OS01G0734000 | CUFF.1163  | OS01T07340(i | TSS1049 | 1.503E-65 |           |
| chr1 | TCONS_00012942 | XLOC_009854 | 30606907 | 30607165 | - | 1 | OS01G0734000 | CUFF.1491  | OS01T07340(i | TSS1049 | 1.512E-25 |           |
| chr1 | TCONS_00012943 | XLOC_009856 | 30612884 | 30613084 | - | 1 | NA           | CUFF.1482  | NA           | u       | TSS1049   | 1.549E-20 |
| chr1 | TCONS_00012944 | XLOC_009858 | 30624457 | 30624693 | - | 1 | OS01G0734333 | CUFF.1493  | OS01T07343(i | TSS1049 | 1.033E-24 |           |
| chr1 | TCONS_00012945 | XLOC_009872 | 30736201 | 30736411 | - | 1 | NA           | CUFF.1488  | NA           | u       | TSS1051   | 9.158E-23 |
| chr1 | TCONS_00009934 | XLOC_009875 | 30740623 | 30740879 | - | 1 | OS01G0736900 | CUFF.1192  | OS01T07369(x | TSS1051 | 3.296E-88 |           |

|      |                |             |          |          |   |   |              |           |              |         |           |           |
|------|----------------|-------------|----------|----------|---|---|--------------|-----------|--------------|---------|-----------|-----------|
| chr1 | TCONS_00009950 | XLOC_009891 | 30870585 | 30870825 | - | 1 | OS01G0739200 | CUFF.1170 | OS01T07392(x | TSS1053 | 1.463E-23 |           |
| chr1 | TCONS_00012949 | XLOC_009897 | 30910902 | 30912462 | - | 1 | OS01G0740300 | CUFF.1521 | OS01T07403(i | TSS1053 | 4.2E-31   |           |
| chr1 | TCONS_00012950 | XLOC_009898 | 30914030 | 30914230 | - | 1 | OS01G0740300 | CUFF.1524 | OS01T07403(i | TSS1053 | 1.512E-25 |           |
| chr1 | TCONS_00012952 | XLOC_009921 | 31090214 | 31090415 | - | 1 | NA           | CUFF.1515 | NA           | u       | TSS1056   | 2.943E-20 |
| chr1 | TCONS_00009982 | XLOC_009922 | 31092637 | 31092865 | - | 1 | NA           | CUFF.1177 | NA           | u       | TSS1056   | 1.237E-35 |
| chr1 | TCONS_00012954 | XLOC_009924 | 31100652 | 31100980 | - | 1 | OS01G0744000 | CUFF.1522 | OS01T07440(i | TSS1056 | 6.174E-32 |           |
| chr1 | TCONS_00009991 | XLOC_009932 | 31203991 | 31204387 | - | 1 | OS01G0746200 | CUFF.1181 | OS01T07462(x | TSS1057 | 0         |           |
| chr1 | TCONS_00012955 | XLOC_009933 | 31204533 | 31204830 | - | 1 | OS01G0746200 | CUFF.1526 | OS01T07462(i | TSS1057 | 1.739E-22 |           |
| chr1 | TCONS_00010012 | XLOC_009954 | 31350902 | 31351143 | - | 1 | OS01G0748900 | CUFF.1188 | OS01T07489(i | TSS1059 | 0         |           |
| chr1 | TCONS_00012958 | XLOC_009961 | 31401228 | 31401448 | - | 1 | NA           | CUFF.1534 | NA           | u       | TSS1060   | 4.766E-28 |
| chr1 | TCONS_00010043 | XLOC_009988 | 31636000 | 31636233 | - | 1 | OS01G0754000 | CUFF.1207 | OS01T07540(x | TSS1063 | 1.05E-27  |           |
| chr1 | TCONS_00010079 | XLOC_010018 | 31908488 | 31908713 | - | 1 | NA           | CUFF.1216 | NA           | u       | TSS1066   | 1.463E-23 |
| chr1 | TCONS_00012965 | XLOC_010019 | 31910149 | 31910651 | - | 1 | NCRNA_47455  | CUFF.1573 | NCRNA_474:x  | TSS1066 | 7.964E-07 |           |
| chr1 | TCONS_00010082 | XLOC_010021 | 31922533 | 31922848 | - | 1 | NA           | CUFF.1217 | NA           | u       | TSS1066   | 1.391E-09 |
| chr1 | TCONS_00012973 | XLOC_010068 | 32244784 | 32245012 | - | 1 | OS01G0765200 | CUFF.1594 | OS01T07652(x | TSS1071 | 2.627E-82 |           |
| chr1 | TCONS_00010149 | XLOC_010083 | 32353680 | 32353881 | - | 1 | OS01G0767700 | CUFF.1248 | OS01T07677(x | TSS1073 | 0         |           |
| chr1 | TCONS_00012977 | XLOC_010093 | 32410337 | 32410664 | - | 1 | OS01G0768600 | CUFF.1624 | OS01T07686(i | TSS1074 | 3.311E-37 |           |
| chr1 | TCONS_00012978 | XLOC_010096 | 32425080 | 32425288 | - | 1 | OS01G0768700 | CUFF.1616 | OS01T07687(x | TSS1074 | 2.38E-16  |           |
| chr1 | TCONS_00010161 | XLOC_010098 | 32434946 | 32435268 | - | 1 | OS01G0769000 | CUFF.1250 | OS01T07690(x | TSS1075 | 0         |           |
| chr1 | TCONS_00010162 | XLOC_010099 | 32435497 | 32436070 | - | 1 | OS01G0769000 | CUFF.1252 | OS01T07690(i | TSS1075 | 0.22427   |           |
| chr1 | TCONS_00010163 | XLOC_010100 | 32441358 | 32441586 | - | 1 | NA           | CUFF.1245 | NA           | u       | TSS1075   | 1.594E-22 |
| chr1 | TCONS_00010172 | XLOC_010111 | 32523869 | 32524176 | - | 1 | COPT1        | CUFF.1251 | OS01T07707(x | TSS1076 | 0         |           |
| chr1 | TCONS_00010191 | XLOC_010130 | 32616189 | 32616414 | - | 1 | OS01G0772600 | CUFF.1267 | OS01T07726(i | TSS1078 | 5.553E-31 |           |
| chr1 | TCONS_00012985 | XLOC_010132 | 32618370 | 32618585 | - | 1 | OS01G0772600 | CUFF.1644 | OS01T07726(x | TSS1078 | 3.449E-60 |           |
| chr1 | TCONS_00012988 | XLOC_010163 | 32888882 | 32889101 | - | 1 | OS01G0777200 | CUFF.1655 | OS01T07772(i | TSS1081 | 1.339E-23 |           |
| chr1 | TCONS_00012991 | XLOC_010176 | 32966181 | 32966500 | - | 1 | OS01G0778800 | CUFF.1691 | OS01T07788(i | TSS1083 | 2.704E-37 |           |
| chr1 | TCONS_00010237 | XLOC_010177 | 32967556 | 32967869 | - | 1 | OS01G0778800 | CUFF.1303 | OS01T07788(i | TSS1083 | 2.762E-58 |           |
| chr1 | TCONS_00012992 | XLOC_010178 | 32974799 | 32975079 | - | 1 | OS01G0778800 | CUFF.1694 | OS01T07788(i | TSS1083 | 1.702E-21 |           |
| chr1 | TCONS_00012993 | XLOC_010191 | 33058734 | 33058938 | - | 1 | NA           | CUFF.1658 | NA           | u       | TSS1084   | 2.542E-23 |
| chr1 | TCONS_00012994 | XLOC_010195 | 33099736 | 33099937 | - | 1 | OS01G0781200 | CUFF.1677 | OS01T07812(x | TSS1085 | 3.258E-32 |           |
| chr1 | TCONS_00010274 | XLOC_010211 | 33207181 | 33207384 | - | 1 | OS01G0783600 | CUFF.1282 | OS01T07836(x | TSS1086 | 0         |           |
| chr1 | TCONS_00010307 | XLOC_010244 | 33410875 | 33411084 | - | 1 | OS01G0787600 | CUFF.1305 | OS01T07876(i | TSS1090 | 0         |           |
| chr1 | TCONS_00010326 | XLOC_010263 | 33506193 | 33507022 | - | 1 | NA           | CUFF.1374 | NA           | u       | TSS1092   | 0         |
| chr1 | TCONS_00010337 | XLOC_010273 | 33545905 | 33546324 | - | 1 | NA           | CUFF.1309 | NA           | u       | TSS1093   | 5.745E-19 |
| chr1 | TCONS_00013005 | XLOC_010274 | 33549383 | 33549734 | - | 1 | NA           | CUFF.1758 | NA           | u       | TSS1093   | 0         |

|      |                |             |          |          |   |   |              |           |              |   |         |           |
|------|----------------|-------------|----------|----------|---|---|--------------|-----------|--------------|---|---------|-----------|
| chr1 | TCONS_00013006 | XLOC_010275 | 33549907 | 33551610 | - | 1 | NA           | CUFF.1758 | NA           | u | TSS1093 | 8.256E-15 |
| chr1 | TCONS_00013008 | XLOC_010287 | 33584167 | 33584386 | - | 1 | NA           | CUFF.1759 | NA           | u | TSS1094 | 1.066E-57 |
| chr1 | TCONS_00013009 | XLOC_010288 | 33584508 | 33584718 | - | 1 | NA           | CUFF.1759 | NA           | u | TSS1095 | 2.348E-45 |
| chr1 | TCONS_00013016 | XLOC_010335 | 33972043 | 33972261 | - | 1 | ISPE         | CUFF.1762 | OS01T08021(i |   | TSS1100 | 1.61E-45  |
| chr1 | TCONS_00010429 | XLOC_010357 | 34168604 | 34168834 | - | 1 | TUBB4        | CUFF.1354 | OS01T08059(i |   | TSS1102 | 5.524E-13 |
| chr1 | TCONS_00013019 | XLOC_010380 | 34417859 | 34418066 | - | 1 | OS01G0810200 | CUFF.1747 | OS01T08102(i |   | TSS1104 | 4.824E-23 |
| chr1 | TCONS_00013024 | XLOC_010396 | 34520336 | 34520824 | - | 1 | OS01G0812050 | CUFF.1760 | OS01T08120(x |   | TSS1106 | 1.795E-42 |
| chr1 | TCONS_00013027 | XLOC_010441 | 34863976 | 34864234 | - | 1 | WOX8         | CUFF.1782 | OS01T08184(i |   | TSS1111 | 5.961E-15 |
| chr1 | TCONS_00013028 | XLOC_010450 | 34896786 | 34896988 | - | 1 | NA           | CUFF.1774 | NA           | u | TSS1112 | 3.396E-42 |
| chr1 | TCONS_00010532 | XLOC_010459 | 34941139 | 34941362 | - | 1 | OS01G0819466 | CUFF.1395 | OS01T08194(i |   | TSS1113 | 2.074E-19 |
| chr1 | TCONS_00013031 | XLOC_010481 | 35146206 | 35146484 | - | 1 | EXPA2        | CUFF.1798 | OS01T08231(x |   | TSS1115 | 5.476E-35 |
| chr1 | TCONS_00010556 | XLOC_010483 | 35157382 | 35157621 | - | 1 | OS01G0823400 | CUFF.1394 | OS01T08234(i |   | TSS1116 | 1.541E-10 |
| chr1 | TCONS_00010597 | XLOC_010524 | 35540435 | 35541279 | - | 1 | OS01G0830700 | CUFF.1408 | OS01T08307(i |   | TSS1120 | 4.944E-48 |
| chr1 | TCONS_00013035 | XLOC_010525 | 35541669 | 35542136 | - | 1 | OS01G0830700 | CUFF.1819 | OS01T08307(i |   | TSS1120 | 0.015982  |
| chr1 | TCONS_00013037 | XLOC_010529 | 35552200 | 35552400 | - | 1 | NA           | CUFF.1811 | NA           | u | TSS1120 | 6.994E-29 |
| chr1 | TCONS_00010619 | XLOC_010545 | 35734631 | 35734920 | - | 1 | OS01G0834200 | CUFF.1416 | OS01T08342(i |   | TSS1122 | 5.414E-75 |
| chr1 | TCONS_00010641 | XLOC_010566 | 35853526 | 35853734 | - | 1 | OS01G0836400 | CUFF.1421 | OS01T08364(x |   | TSS1124 | 0         |
| chr1 | TCONS_00010684 | XLOC_010609 | 36135811 | 36136811 | - | 1 | ERG1         | CUFF.1450 | OS01T08417(x |   | TSS1129 | 2.859E-60 |
| chr1 | TCONS_00010685 | XLOC_010610 | 36137320 | 36137521 | - | 1 | NA           | CUFF.1452 | NA           | u | TSS1129 | 2.137E-60 |
| chr1 | TCONS_00010705 | XLOC_010629 | 36361781 | 36362006 | - | 1 | OS01G0846500 | CUFF.1451 | OS01T08465(i |   | TSS1131 | 2.476E-13 |
| chr1 | TCONS_00013051 | XLOC_010636 | 36392587 | 36393000 | - | 1 | OS01G0847100 | CUFF.1866 | OS01T08471(x |   | TSS1132 | 2.439E-07 |
| chr1 | TCONS_00013052 | XLOC_010659 | 36540802 | 36541162 | - | 1 | ERH1         | CUFF.1878 | OS01T08501(i |   | TSS1135 | 5.939E-44 |
| chr1 | TCONS_00013057 | XLOC_010693 | 36774713 | 36774929 | - | 1 | NA           | CUFF.1881 | NA           | u | TSS1138 | 3.405E-06 |
| chr1 | TCONS_00010782 | XLOC_010701 | 36951882 | 36952083 | - | 1 | OS01G0856000 | CUFF.1469 | OS01T08560(x |   | TSS1139 | 0         |
| chr1 | TCONS_00010817 | XLOC_010735 | 37307667 | 37307912 | - | 1 | OS01G0861700 | CUFF.1482 | OS01T08617(x |   | TSS1143 | 7.713E-07 |
| chr1 | TCONS_00010846 | XLOC_010763 | 37510079 | 37510729 | - | 1 | OS01G0866100 | CUFF.1532 | OS01T08661(i |   | TSS1146 | 3.001E-11 |
| chr1 | TCONS_00010853 | XLOC_010770 | 37550064 | 37550265 | - | 1 | OS01G0867100 | CUFF.1498 | OS01T08671(i |   | TSS1146 | 1.612E-64 |
| chr1 | TCONS_00013067 | XLOC_010775 | 37583380 | 37583748 | - | 1 | OS01G0867800 | CUFF.1949 | OS01T08678(x |   | TSS1147 | 7.972E-26 |
| chr1 | TCONS_00010871 | XLOC_010787 | 37691197 | 37691402 | - | 1 | OS01G0869600 | CUFF.1509 | OS01T08696(i |   | TSS1148 | 0         |
| chr1 | TCONS_00013070 | XLOC_010800 | 37766364 | 37766615 | - | 1 | OS01G0871100 | CUFF.1954 | OS01T08711(x |   | TSS1150 | 3.129E-15 |
| chr1 | TCONS_00013075 | XLOC_010831 | 37933532 | 37933913 | - | 1 | NA           | CUFF.1973 | NA           | u | TSS1153 | 9.541E-18 |
| chr1 | TCONS_00013077 | XLOC_010835 | 37985363 | 37985671 | - | 1 | OS01G0875300 | CUFF.1983 | OS01T08753(x |   | TSS1153 | 4.706E-07 |
| chr1 | TCONS_00010923 | XLOC_010837 | 38010835 | 38011070 | - | 1 | OS01G0875700 | CUFF.1528 | OS01T08757(i |   | TSS1154 | 2.734E-35 |
| chr1 | TCONS_00010937 | XLOC_010848 | 38085752 | 38085991 | - | 1 | OS01G0877600 | CUFF.1534 | OS01T08776(i |   | TSS1155 | 4.829E-23 |
| chr1 | TCONS_00013078 | XLOC_010853 | 38112425 | 38112718 | - | 1 | OS01G0878300 | CUFF.1998 | OS01T08783(i |   | TSS1155 | 2.26E-21  |

|      |                |             |          |          |   |   |              |           |              |         |           |
|------|----------------|-------------|----------|----------|---|---|--------------|-----------|--------------|---------|-----------|
| chr1 | TCONS_00013079 | XLOC_010854 | 38112948 | 38113210 | - | 1 | OS01G0878300 | CUFF.2002 | OS01T08783(i | TSS1155 | 4.293E-21 |
| chr1 | TCONS_00013080 | XLOC_010863 | 38198039 | 38198378 | - | 1 | OS01G0880200 | CUFF.2005 | OS01T08802(i | TSS1156 | 7.972E-26 |
| chr1 | TCONS_00013081 | XLOC_010872 | 38256535 | 38256904 | - | 1 | SWEET1A      | CUFF.1995 | OS01T08813(x | TSS1157 | 7.187E-39 |
| chr1 | TCONS_00013082 | XLOC_010874 | 38261362 | 38261630 | - | 1 | OS01G0881400 | CUFF.1997 | OS01T08814(x | TSS1158 | 2.378E-37 |
| chr1 | TCONS_00010969 | XLOC_010882 | 38303221 | 38303431 | - | 1 | OS01G0882300 | CUFF.1544 | OS01T08823(i | TSS1158 | 0         |
| chr1 | TCONS_00010975 | XLOC_010888 | 38328799 | 38329167 | - | 1 | NA           | CUFF.1543 | NA u         | TSS1159 | 5.741E-21 |
| chr1 | TCONS_00010989 | XLOC_010902 | 38437729 | 38437945 | - | 1 | OS01G0884900 | CUFF.1548 | OS01T08849(i | TSS1161 | 6.622E-39 |
| chr1 | TCONS_00013088 | XLOC_010909 | 38476412 | 38476886 | - | 1 | OS01G0885600 | CUFF.2019 | OS01T08856(i | TSS1162 | 1.063E-19 |
| chr1 | TCONS_00011003 | XLOC_010915 | 38510588 | 38510797 | - | 1 | OS01G0886300 | CUFF.1557 | OS01T08863(i | TSS1162 | 1.236E-85 |
| chr1 | TCONS_00013089 | XLOC_010922 | 38539739 | 38540227 | - | 1 | OS01G0886900 | CUFF.2025 | OS01T08869(x | TSS1163 | 8.476E-65 |
| chr1 | TCONS_00011025 | XLOC_010936 | 38638124 | 38638325 | - | 1 | OS01G0888800 | CUFF.1559 | OS01T08888(x | TSS1165 | 0         |
| chr1 | TCONS_00013094 | XLOC_010968 | 38846448 | 38846664 | - | 1 | OS01G0893400 | CUFF.2036 | OS01T08934(x | TSS1168 | 9.482E-43 |
| chr1 | TCONS_00011079 | XLOC_010986 | 39001896 | 39002108 | - | 1 | NA           | CUFF.1573 | NA u         | TSS1170 | 1.154E-86 |
| chr1 | TCONS_00011092 | XLOC_011001 | 39118648 | 39118892 | - | 1 | NA           | CUFF.1596 | NA u         | TSS1172 | 4.143E-28 |
| chr1 | TCONS_00013098 | XLOC_011002 | 39122250 | 39122579 | - | 1 | NA           | CUFF.2071 | NA u         | TSS1172 | 0.024543  |
| chr1 | TCONS_00013101 | XLOC_011010 | 39159565 | 39159859 | - | 1 | NA           | CUFF.2058 | NA u         | TSS1172 | 4.203E-26 |
| chr1 | TCONS_00013102 | XLOC_011016 | 39211908 | 39212218 | - | 1 | OS01G0900800 | CUFF.2069 | OS01T09008(i | TSS1173 | 7.972E-26 |
| chr1 | TCONS_00013104 | XLOC_011032 | 39320863 | 39321167 | - | 1 | NA           | CUFF.2061 | NA u         | TSS1175 | 5.321E-39 |
| chr1 | TCONS_00011170 | XLOC_011074 | 39701231 | 39701675 | - | 1 | RPN2         | CUFF.1618 | OS01T09112(i | TSS1179 | 1.25E-62  |
| chr1 | TCONS_00011175 | XLOC_011078 | 39734782 | 39734994 | - | 1 | OS01G0911800 | CUFF.1612 | OS01T09118(x | TSS1180 | 1.279E-73 |
| chr1 | TCONS_00013112 | XLOC_011128 | 40117300 | 40117628 | - | 1 | OS01G0919500 | CUFF.2111 | OS01T09195(i | TSS1185 | 3.995E-62 |
| chr1 | TCONS_00013114 | XLOC_011130 | 40121257 | 40121481 | - | 1 | NA           | CUFF.2108 | NA u         | TSS1185 | 1.187E-36 |
| chr1 | TCONS_00013117 | XLOC_011152 | 40333687 | 40334339 | - | 1 | OS01G0922600 | CUFF.2124 | OS01T09226(x | TSS1188 | 1.775E-08 |
| chr1 | TCONS_00013118 | XLOC_011155 | 40346863 | 40347422 | - | 1 | OS01G0922800 | CUFF.2133 | OS01T09228(i | TSS1188 | 2.728E-22 |
| chr1 | TCONS_00011262 | XLOC_011156 | 40349926 | 40350176 | - | 1 | NCRNA_39499  | CUFF.1638 | NCRNA_3949(x | TSS1188 | 1.544E-76 |
| chr1 | TCONS_00011279 | XLOC_011171 | 40479702 | 40479915 | - | 1 | NA           | CUFF.1644 | NA u         | TSS1190 | 3.657E-47 |
| chr1 | TCONS_00013123 | XLOC_011208 | 40743648 | 40743872 | - | 1 | OS01G0928300 | CUFF.2169 | OS01T09283(x | TSS1194 | 4.202E-67 |
| chr1 | TCONS_00011329 | XLOC_011217 | 40814239 | 40814474 | - | 1 | NA           | CUFF.1674 | NA u         | TSS1195 | 1.356E-15 |
| chr1 | TCONS_00013126 | XLOC_011240 | 40935071 | 40935275 | - | 1 | NA           | CUFF.2175 | NA u         | TSS1198 | 2.638E-18 |
| chr1 | TCONS_00013131 | XLOC_011287 | 41184182 | 41184403 | - | 1 | NA           | CUFF.2187 | NA u         | TSS1203 | 7.81E-88  |
| chr1 | TCONS_00013133 | XLOC_011316 | 41496089 | 41497190 | - | 1 | OS01G0944100 | CUFF.2214 | OS01T09441(x | TSS1206 | 2.507E-09 |
| chr1 | TCONS_00013134 | XLOC_011317 | 41499490 | 41500138 | - | 1 | OS01G0944100 | CUFF.2215 | OS01T09441(i | TSS1206 | 7.187E-39 |
| chr1 | TCONS_00013136 | XLOC_011319 | 41510723 | 41511019 | - | 1 | OS01G0944200 | CUFF.2210 | OS01T09442(i | TSS1206 | 2.165E-14 |
| chr1 | TCONS_00013138 | XLOC_011321 | 41516701 | 41516949 | - | 1 | OS01G0944200 | CUFF.2220 | OS01T09442(i | TSS1207 | 5.443E-25 |
| chr1 | TCONS_00013139 | XLOC_011351 | 41712027 | 41712538 | - | 1 | OS01G0948200 | CUFF.2216 | OS01T09482(x | TSS1210 | 2.115E-08 |

|       |                |             |          |          |   |   |              |            |              |         |           |           |
|-------|----------------|-------------|----------|----------|---|---|--------------|------------|--------------|---------|-----------|-----------|
| chr1  | TCONS_00011487 | XLOC_011366 | 41819185 | 41819689 | - | 1 | OS01G0949300 | CUFF.1717  | OS01T09493(x | TSS1211 | 0         |           |
| chr1  | TCONS_00011501 | XLOC_011380 | 41920325 | 41920534 | - | 1 | OS01G0952200 | CUFF.1720  | OS01T09522(i | TSS1213 | 2.223E-43 |           |
| chr1  | TCONS_00013144 | XLOC_011407 | 42092289 | 42092609 | - | 1 | OS01G0955700 | CUFF.2261  | OS01T09557(i | TSS1216 | 1.25E-16  |           |
| chr1  | TCONS_00013145 | XLOC_011410 | 42095384 | 42095765 | - | 1 | OS01G0955700 | CUFF.2244  | OS01T09557(x | TSS1216 | 4.67E-51  |           |
| chr1  | TCONS_00011546 | XLOC_011427 | 42249553 | 42249784 | - | 1 | OS01G0958500 | CUFF.1740  | OS01T09585(i | TSS1218 | 0         |           |
| chr1  | TCONS_00013149 | XLOC_011438 | 42326216 | 42326421 | - | 1 | NA           | CUFF.2256  | NA           | u       | TSS1219   | 1.187E-36 |
| chr1  | TCONS_00011557 | XLOC_011439 | 42326854 | 42327110 | - | 1 | NA           | CUFF.1747  | NA           | u       | TSS1219   | 0         |
| chr1  | TCONS_00013151 | XLOC_011441 | 42328624 | 42328949 | - | 1 | OS01G0960200 | CUFF.2263  | OS01T09602(x | TSS1219 | 4.2E-31   |           |
| chr1  | TCONS_00013153 | XLOC_011455 | 42404147 | 42404496 | - | 1 | NA           | CUFF.2267  | NA           | u       | TSS1221   | 2.26E-21  |
| chr1  | TCONS_00013154 | XLOC_011456 | 42405106 | 42405626 | - | 1 | NA           | CUFF.2269  | NA           | u       | TSS1221   | 4.047E-49 |
| chr1  | TCONS_00013157 | XLOC_011472 | 42544519 | 42544764 | - | 1 | NA           | CUFF.2291  | NA           | u       | TSS1222   | 2.248E-36 |
| chr1  | TCONS_00013159 | XLOC_011474 | 42545838 | 42546126 | - | 1 | NA           | CUFF.2275  | NA           | u       | TSS1223   | 4.658E-09 |
| chr1  | TCONS_00013160 | XLOC_011475 | 42546566 | 42546905 | - | 1 | NA           | CUFF.2276  | NA           | u       | TSS1223   | 4.766E-28 |
| chr1  | TCONS_00011607 | XLOC_011489 | 42602178 | 42602431 | - | 1 | NA           | CUFF.1758  | NA           | u       | TSS1225   | 1.161E-06 |
| chr1  | TCONS_00013165 | XLOC_011491 | 42603945 | 42604236 | - | 1 | NA           | CUFF.2288  | NA           | u       | TSS1225   | 0.055581  |
| chr1  | TCONS_00013167 | XLOC_011494 | 42606335 | 42606565 | - | 1 | NA           | CUFF.2286  | NA           | u       | TSS1225   | 1.501E-13 |
| chr1  | TCONS_00011628 | XLOC_011514 | 42692164 | 42692369 | - | 1 | OS01G0967900 | CUFF.1773  | OS01T09679(i | TSS1227 | 0         |           |
| chr1  | TCONS_00013173 | XLOC_011554 | 42971089 | 42971451 | - | 1 | OS01G0973300 | CUFF.2314  | OS01T09733(x | TSS1231 | 1.413E-22 |           |
| chr1  | TCONS_00011711 | XLOC_011596 | 10474984 | 10475200 | . | 1 | OS01G0289600 | CUFF.415.1 | OS01T02896(i | TSS1236 | 1.084E-42 |           |
| chr1  | TCONS_00013180 | XLOC_011598 | 11618841 | 11619045 | . | 1 | OS01G0309900 | CUFF.596.1 | OS01T03099(i | TSS1236 | 5.592E-20 |           |
| chr1  | TCONS_00011713 | XLOC_011603 | 19395670 | 19395899 | . | 1 | OS01G0534900 | CUFF.695.1 | OS01T05349(i | TSS1236 | 4.455E-39 |           |
| chr1  | TCONS_00013192 | XLOC_011614 | 26812358 | 26812561 | . | 1 | OS01G0659200 | CUFF.1720  | OS01T06592(i | TSS1237 | 6.234E-22 |           |
| chr1  | TCONS_00013207 | XLOC_011634 | 32474842 | 32475042 | . | 1 | OS01G0769900 | CUFF.1627  | OS01T07699(i | TSS1239 | 7.056E-24 |           |
| chr1  | TCONS_00013212 | XLOC_011639 | 33733872 | 33734074 | . | 1 | OS01G0796500 | CUFF.1761  | OS01T07965(i | TSS1240 | 1.387E-18 |           |
| chr1  | TCONS_00011721 | XLOC_011640 | 33927010 | 33927214 | . | 1 | OS01G0801100 | CUFF.1336  | OS01T08011(i | TSS1240 | 2.545E-52 |           |
| chr1  | TCONS_00011726 | XLOC_011653 | 41070060 | 41070284 | . | 1 | OS01G0935600 | CUFF.1692  | OS01T09356(i | TSS1241 | 4.079E-25 |           |
| chr10 | TCONS_00018571 | XLOC_011704 | 410936   | 411325   | + | 1 | OS10G0105400 | CUFF.2344  | OS10T01054(i | TSS1247 | 3.839E-19 |           |
| chr10 | TCONS_00013285 | XLOC_011717 | 537060   | 537268   | + | 1 | NA           | CUFF.1804  | NA           | u       | TSS1248   | 0         |
| chr10 | TCONS_00018574 | XLOC_011782 | 1140995  | 1141207  | + | 1 | OS10G0118000 | CUFF.2359  | OS10T01180(x | TSS1255 | 4.293E-21 |           |
| chr10 | TCONS_00013360 | XLOC_011787 | 1194705  | 1195136  | + | 1 | OS10G0118900 | CUFF.1827  | OS10T01189(x | TSS1255 | 3.947E-26 |           |
| chr10 | TCONS_00018575 | XLOC_011788 | 1195305  | 1196159  | + | 1 | NA           | CUFF.2364  | NA           | u       | TSS1256   | 0.99936   |
| chr10 | TCONS_00013362 | XLOC_011789 | 1196302  | 1196537  | + | 1 | NA           | CUFF.1815  | NA           | u       | TSS1256   | 2.717E-30 |
| chr10 | TCONS_00013367 | XLOC_011795 | 1202239  | 1202475  | + | 1 | NA           | CUFF.1822  | NA           | u       | TSS1256   | 6.603E-24 |
| chr10 | TCONS_00018581 | XLOC_011800 | 1224282  | 1224741  | + | 1 | NA           | CUFF.2366  | NA           | u       | TSS1257   | 1.859E-10 |
| chr10 | TCONS_00013407 | XLOC_011835 | 1542841  | 1543079  | + | 1 | NA           | CUFF.1832  | NA           | u       | TSS1261   | 7.707E-37 |



|                      |             |          |            |   |              |                        |         |           |           |
|----------------------|-------------|----------|------------|---|--------------|------------------------|---------|-----------|-----------|
| chr10 TCONS_00018585 | XLOC_011850 | 1744385  | 1744596 +  | 1 | OS10G0127900 | CUFF.2386 OS10T01279(x | TSS1262 | 0.005791  |           |
| chr10 TCONS_00018586 | XLOC_011851 | 1748578  | 1749963 +  | 1 | OS10G0127900 | CUFF.2396 OS10T01279(i | TSS1262 | 1.091E-44 |           |
| chr10 TCONS_00018587 | XLOC_011852 | 1750211  | 1750455 +  | 1 | OS10G0127900 | CUFF.2399 OS10T01279(i | TSS1262 | 7.048E-34 |           |
| chr10 TCONS_00013449 | XLOC_011881 | 1956431  | 1956699 +  | 1 | OS10G0131800 | CUFF.1843 OS10T01318(i | TSS1265 | 0.48773   |           |
| chr10 TCONS_00013484 | XLOC_011919 | 2226067  | 2226291 +  | 1 | NA           | CUFF.1845 NA           | u       | TSS1269   | 3.192E-33 |
| chr10 TCONS_00013486 | XLOC_011921 | 2232366  | 2232758 +  | 1 | NA           | CUFF.1846 NA           | u       | TSS1269   | 1.369E-05 |
| chr10 TCONS_00013488 | XLOC_011923 | 2236009  | 2236261 +  | 1 | NA           | CUFF.1847 NA           | u       | TSS1270   | 4.079E-25 |
| chr10 TCONS_00013552 | XLOC_011986 | 2755902  | 2756125 +  | 1 | NA           | CUFF.1856 NA           | u       | TSS1276   | 1.2E-46   |
| chr10 TCONS_00018598 | XLOC_011988 | 2756577  | 2757542 +  | 1 | NA           | CUFF.1555 NA           | u       | TSS1276   | 0         |
| chr10 TCONS_00018607 | XLOC_012079 | 3741434  | 3741781 +  | 1 | OS10G0159033 | CUFF.2450 OS10T01590(i | TSS1286 | 2.507E-09 |           |
| chr10 TCONS_00018611 | XLOC_012092 | 3941253  | 3941523 +  | 1 | OS10G0161800 | CUFF.2453 OS10T01618(x | TSS1287 | 1.858E-68 |           |
| chr10 TCONS_00018618 | XLOC_012255 | 5655252  | 5655668 +  | 1 | NA           | CUFF.2487 NA           | u       | TSS1304   | 2.26E-21  |
| chr10 TCONS_00018621 | XLOC_012259 | 5659565  | 5659768 +  | 1 | NA           | CUFF.2489 NA           | u       | TSS1304   | 8.337E-59 |
| chr10 TCONS_00013827 | XLOC_012264 | 5663311  | 5663526 +  | 1 | OS10G0182300 | CUFF.1907 OS10T01823(x | TSS1305 | 1.029E-10 |           |
| chr10 TCONS_00013828 | XLOC_012265 | 5664020  | 5664262 +  | 1 | NA           | CUFF.1905 NA           | u       | TSS1305   | 9.992E-55 |
| chr10 TCONS_00013887 | XLOC_012320 | 6213429  | 6213629 +  | 1 | OS10G0189600 | CUFF.1927 OS10T01896(x | TSS1311 | 4.716E-77 |           |
| chr10 TCONS_00013919 | XLOC_012352 | 6587882  | 6588095 +  | 1 | NA           | CUFF.1934 NA           | u       | TSS1314   | 4.28E-67  |
| chr10 TCONS_00013920 | XLOC_012353 | 6588985  | 6589188 +  | 1 | NA           | CUFF.1935 NA           | u       | TSS1314   | 1.287E-56 |
| chr10 TCONS_00018626 | XLOC_012353 | 6588676  | 6589030 +  | 1 | NA           | CUFF.2522 NA           | u       | TSS1314   | 2.248E-36 |
| chr10 TCONS_00018628 | XLOC_012355 | 6597588  | 6598018 +  | 1 | OS10G0195250 | CUFF.2524 OS10T01952(i | TSS1314 | 0         |           |
| chr10 TCONS_00018630 | XLOC_012368 | 6735636  | 6735885 +  | 1 | NA           | CUFF.2527 NA           | u       | TSS1316   | 6.174E-32 |
| chr10 TCONS_00018638 | XLOC_012446 | 7698756  | 7699192 +  | 1 | OS10G0208600 | CUFF.2570 OS10T02086(i | TSS1324 | 1.713E-27 |           |
| chr10 TCONS_00018641 | XLOC_012477 | 8322164  | 8322364 +  | 1 | NA           | CUFF.2563 NA           | u       | TSS1327   | 1.508E-30 |
| chr10 TCONS_00014073 | XLOC_012506 | 8835727  | 8835933 +  | 1 | NA           | CUFF.1969 NA           | u       | TSS1330   | 1.965E-84 |
| chr10 TCONS_00014085 | XLOC_012518 | 8942291  | 8942502 +  | 1 | NA           | CUFF.1974 NA           | u       | TSS1331   | 3.559E-42 |
| chr10 TCONS_00014201 | XLOC_012630 | 10215823 | 10216049 + | 1 | NA           | CUFF.2001 NA           | u       | TSS1343   | 1.463E-23 |
| chr10 TCONS_00018648 | XLOC_012648 | 10410794 | 10411652 + | 1 | OS10G0346600 | CUFF.2619 OS10T03466(x | TSS1345 | 1.975E-18 |           |
| chr10 TCONS_00018649 | XLOC_012695 | 10811597 | 10813217 + | 1 | NCRNA_1535   | CUFF.2630 NCRNA_153(x  | TSS1350 | 4.46E-24  |           |
| chr10 TCONS_00014342 | XLOC_012768 | 11305268 | 11305565 + | 1 | OS10G0363650 | CUFF.2050 OS10T03636(x | TSS1357 | 2.896E-57 |           |
| chr10 TCONS_00018659 | XLOC_012773 | 11309945 | 11310522 + | 1 | NA           | CUFF.6237 NA           | u       | TSS1358   | 2.172E-41 |
| chr10 TCONS_00014346 | XLOC_012775 | 11311630 | 11311863 + | 1 | NA           | CUFF.2054 NA           | u       | TSS1358   | 0         |
| chr10 TCONS_00018661 | XLOC_012775 | 11311205 | 11311698 + | 1 | NA           | CUFF.6239 NA           | u       | TSS1358   | 3.295E-55 |
| chr10 TCONS_00018663 | XLOC_012775 | 11312275 | 11312921 + | 1 | NA           | CUFF.6244 NA           | u       | TSS1358   | 1.527E-35 |
| chr10 TCONS_00014374 | XLOC_012800 | 11568652 | 11568891 + | 1 | NA           | CUFF.2060 NA           | u       | TSS1361   | 2.943E-29 |
| chr10 TCONS_00014385 | XLOC_012810 | 11633484 | 11633693 + | 1 | OS10G0370000 | CUFF.2069 OS10T03700(i | TSS1362 | 2.943E-29 |           |

|                      |             |          |          |   |   |              |           |              |         |           |           |
|----------------------|-------------|----------|----------|---|---|--------------|-----------|--------------|---------|-----------|-----------|
| chr10 TCONS_00018666 | XLOC_012819 | 11706061 | 11706262 | + | 1 | OS10G0370800 | CUFF.6268 | OS10T03708(i | TSS1363 | 2.448E-64 |           |
| chr10 TCONS_00018667 | XLOC_012820 | 11710153 | 11710438 | + | 1 | OS10G0370800 | CUFF.6270 | OS10T03708(i | TSS1363 | 0.028601  |           |
| chr10 TCONS_00018669 | XLOC_012836 | 11807456 | 11807749 | + | 1 | OS10G0372800 | CUFF.2636 | OS10T03728(x | TSS1365 | 6.57E-17  |           |
| chr10 TCONS_00014407 | XLOC_012838 | 11813913 | 11814130 | + | 1 | NA           | CUFF.2076 | NA           | u       | TSS1365   | 4.093E-62 |
| chr10 TCONS_00014410 | XLOC_012842 | 11817371 | 11817651 | + | 1 | NA           | CUFF.2077 | NA           | u       | TSS1365   | 6.012E-30 |
| chr10 TCONS_00018674 | XLOC_012842 | 11817185 | 11817490 | + | 1 | NA           | CUFF.2637 | NA           | u       | TSS1365   | 3.721E-34 |
| chr10 TCONS_00014468 | XLOC_012896 | 12251953 | 12252174 | + | 1 | NA           | CUFF.2094 | NA           | u       | TSS1371   | 4.805E-38 |
| chr10 TCONS_00014470 | XLOC_012899 | 12260412 | 12260703 | + | 1 | OS10G0380800 | CUFF.2098 | OS10T03808(x | TSS1371 | 6.603E-70 |           |
| chr10 TCONS_00018678 | XLOC_012906 | 12341220 | 12341746 | + | 1 | OS10G0382400 | CUFF.2656 | OS10T03824(i | TSS1372 | 2.863E-13 |           |
| chr10 TCONS_00018679 | XLOC_012907 | 12342020 | 12342295 | + | 1 | OS10G0382400 | CUFF.2658 | OS10T03824(i | TSS1372 | 7.048E-34 |           |
| chr10 TCONS_00018680 | XLOC_012925 | 12791775 | 12791977 | + | 1 | NA           | CUFF.2659 | NA           | u       | TSS1374   | 6.268E-22 |
| chr10 TCONS_00014546 | XLOC_012976 | 12997474 | 12997695 | + | 1 | OS10G0390900 | CUFF.2120 | OS10T03909(i | TSS1379 | 8.32E-36  |           |
| chr10 TCONS_00018690 | XLOC_013070 | 13852758 | 13852958 | + | 1 | OS10G0405600 | CUFF.2700 | OS10T04056(i | TSS1389 | 8.061E-36 |           |
| chr10 TCONS_00014687 | XLOC_013119 | 14343649 | 14343865 | + | 1 | OS10G0412000 | CUFF.2162 | OS10T04120(x | TSS1394 | 1.997E-78 |           |
| chr10 TCONS_00014692 | XLOC_013124 | 14351669 | 14351876 | + | 1 | OS10G0412050 | CUFF.2164 | OS10T04120(i | TSS1395 | 0         |           |
| chr10 TCONS_00014706 | XLOC_013140 | 14509433 | 14509648 | + | 1 | NA           | CUFF.2165 | NA           | u       | TSS1396   | 0         |
| chr10 TCONS_00014713 | XLOC_013147 | 14535422 | 14535636 | + | 1 | OS10G0415600 | CUFF.2183 | OS10T04156(i | TSS1397 | 7.208E-85 |           |
| chr10 TCONS_00014741 | XLOC_013174 | 14715988 | 14716212 | + | 1 | NA           | CUFF.2171 | NA           | u       | TSS1400   | 1.738E-21 |
| chr10 TCONS_00014749 | XLOC_013182 | 14746182 | 14746390 | + | 1 | NA           | CUFF.2173 | NA           | u       | TSS1401   | 5.207E-75 |
| chr10 TCONS_00014758 | XLOC_013193 | 14805177 | 14805382 | + | 1 | NA           | CUFF.2176 | NA           | u       | TSS1402   | 1.463E-38 |
| chr10 TCONS_00014767 | XLOC_013202 | 14906056 | 14907857 | + | 1 | OS10G0422000 | CUFF.2203 | OS10T04220(x | TSS1403 | 2.734E-87 |           |
| chr10 TCONS_00018708 | XLOC_013262 | 15404475 | 15404731 | + | 1 | OS10G0431900 | CUFF.2767 | OS10T04319(x | TSS1409 | 5.076E-11 |           |
| chr10 TCONS_00018711 | XLOC_013305 | 15690855 | 15691143 | + | 1 | OS10G0438000 | CUFF.2775 | OS10T04380(x | TSS1413 | 1.549E-20 |           |
| chr10 TCONS_00018716 | XLOC_013372 | 16164907 | 16165285 | + | 1 | NCRNA_43143  | CUFF.2801 | NCRNA_431(x  | TSS1420 | 2.529E-33 |           |
| chr10 TCONS_00018717 | XLOC_013403 | 16491763 | 16492006 | + | 1 | NA           | CUFF.2805 | NA           | u       | TSS1423   | 0         |
| chr10 TCONS_00018718 | XLOC_013406 | 16511338 | 16511614 | + | 1 | OS10G0452800 | CUFF.2814 | OS10T04528(i | TSS1424 | 2.216E-26 |           |
| chr10 TCONS_00018721 | XLOC_013419 | 16625879 | 16626301 | + | 1 | NA           | CUFF.2811 | NA           | u       | TSS1425   | 5.418E-30 |
| chr10 TCONS_00018723 | XLOC_013422 | 16634359 | 16634844 | + | 1 | NCRNA_4322   | CUFF.2813 | NCRNA_432(x  | TSS1425 | 2.248E-36 |           |
| chr10 TCONS_00018724 | XLOC_013434 | 16712482 | 16713014 | + | 1 | OS10G0456900 | CUFF.2826 | OS10T04569(x | TSS1427 | 7.733E-11 |           |
| chr10 TCONS_00018731 | XLOC_013445 | 16726253 | 16726737 | + | 1 | NA           | CUFF.2825 | NA           | u       | TSS1428   | 1.501E-13 |
| chr10 TCONS_00018732 | XLOC_013446 | 16727274 | 16727683 | + | 1 | NA           | CUFF.2830 | NA           | u       | TSS1428   | 9.036E-28 |
| chr10 TCONS_00018737 | XLOC_013451 | 16730928 | 16731219 | + | 1 | NA           | CUFF.2827 | NA           | u       | TSS1428   | 5.418E-30 |
| chr10 TCONS_00018739 | XLOC_013453 | 16733509 | 16733710 | + | 1 | NA           | CUFF.2831 | NA           | u       | TSS1429   | 2.943E-20 |
| chr10 TCONS_00015012 | XLOC_013454 | 16733873 | 16734162 | + | 1 | NA           | CUFF.2243 | NA           | u       | TSS1429   | 0         |
| chr10 TCONS_00018741 | XLOC_013503 | 17105957 | 17106525 | + | 1 | NA           | CUFF.2858 | NA           | u       | TSS1434   | 1.527E-35 |

|                      |             |          |          |   |   |              |           |              |         |           |           |
|----------------------|-------------|----------|----------|---|---|--------------|-----------|--------------|---------|-----------|-----------|
| chr10 TCONS_00018743 | XLOC_013506 | 17114745 | 17115035 | + | 1 | OS10G0463800 | CUFF.2866 | OS10T04638(i | TSS1434 | 3.258E-32 |           |
| chr10 TCONS_00018745 | XLOC_013515 | 17155618 | 17155819 | + | 1 | OS10G0464800 | CUFF.2873 | OS10T04648(x | TSS1435 | 3.249E-27 |           |
| chr10 TCONS_00018747 | XLOC_013519 | 17184115 | 17184488 | + | 1 | OS10G0465800 | CUFF.2868 | OS10T04658(x | TSS1435 | 1.748E-37 |           |
| chr10 TCONS_00015086 | XLOC_013527 | 17227962 | 17228199 | + | 1 | OS10G0466700 | CUFF.2286 | OS10T04667(i | TSS1436 | 0         |           |
| chr10 TCONS_00015187 | XLOC_013617 | 17972765 | 17973013 | + | 1 | OS10G0479001 | CUFF.2301 | OS10T04790(i | TSS1446 | 1.658E-13 |           |
| chr10 TCONS_00015222 | XLOC_013653 | 18234342 | 18234584 | + | 1 | OS10G0482900 | CUFF.2327 | OS10T04829(i | TSS1450 | 4.865E-54 |           |
| chr10 TCONS_00018757 | XLOC_013665 | 18337534 | 18338062 | + | 1 | NA           | CUFF.2924 | NA           | u       | TSS1451   | 4.293E-21 |
| chr10 TCONS_00018758 | XLOC_013666 | 18338648 | 18339102 | + | 1 | NA           | CUFF.2925 | NA           | u       | TSS1451   | 9.712E-11 |
| chr10 TCONS_00015247 | XLOC_013679 | 18409158 | 18409372 | + | 1 | NA           | CUFF.2314 | NA           | u       | TSS1453   | 0         |
| chr10 TCONS_00015253 | XLOC_013685 | 18440245 | 18440452 | + | 1 | OS10G0487400 | CUFF.2320 | OS10T04874(i | TSS1453 | 0         |           |
| chr10 TCONS_00018767 | XLOC_013778 | 19012567 | 19012821 | + | 1 | NA           | CUFF.2965 | NA           | u       | TSS1463   | 2.647E-43 |
| chr10 TCONS_00018774 | XLOC_013842 | 19520063 | 19520264 | + | 1 | OS10G0508500 | CUFF.3002 | OS10T05085(i | TSS1470 | 2.943E-20 |           |
| chr10 TCONS_00018775 | XLOC_013869 | 19733135 | 19733555 | + | 1 | OS10G0512400 | CUFF.3032 | OS10T05124(i | TSS1473 | 9.158E-23 |           |
| chr10 TCONS_00018778 | XLOC_013875 | 19781622 | 19781945 | + | 1 | NA           | CUFF.3018 | NA           | u       | TSS1473   | 1.72E-32  |
| chr10 TCONS_00015470 | XLOC_013891 | 19865635 | 19865843 | + | 1 | OS10G0515400 | CUFF.2382 | OS10T05154(i | TSS1475 | 0         |           |
| chr10 TCONS_00018784 | XLOC_013906 | 19952984 | 19953316 | + | 1 | NA           | CUFF.3028 | NA           | u       | TSS1477   | 7.187E-39 |
| chr10 TCONS_00018786 | XLOC_013911 | 20002744 | 20002974 | + | 1 | OS10G0517500 | CUFF.3039 | OS10T05175(i | TSS1477 | 2.647E-43 |           |
| chr10 TCONS_00018787 | XLOC_013912 | 20003325 | 20003761 | + | 1 | OS10G0517500 | CUFF.3043 | OS10T05175(i | TSS1477 | 2.514E-28 |           |
| chr10 TCONS_00015515 | XLOC_013942 | 20158341 | 20158580 | + | 1 | OS10G0521000 | CUFF.2397 | OS10T05210(i | TSS1480 | 4.829E-23 |           |
| chr10 TCONS_00018794 | XLOC_013963 | 20367275 | 20367720 | + | 1 | OS10G0524100 | CUFF.3057 | OS10T05241(i | TSS1483 | 7.048E-34 |           |
| chr10 TCONS_00018796 | XLOC_013968 | 20397179 | 20397628 | + | 1 | OS10G0524700 | CUFF.3067 | OS10T05247(i | TSS1483 | 6.821E-10 |           |
| chr10 TCONS_00015565 | XLOC_013992 | 20481153 | 20482045 | + | 1 | NA           | CUFF.2466 | NA           | u       | TSS1485   | 6.959E-12 |
| chr10 TCONS_00015566 | XLOC_013993 | 20482997 | 20483615 | + | 1 | NA           | CUFF.2451 | NA           | u       | TSS1486   | 0.021084  |
| chr10 TCONS_00018797 | XLOC_013993 | 20482816 | 20483039 | + | 1 | NA           | CUFF.3713 | NA           | u       | TSS1486   | 2.898E-40 |
| chr10 TCONS_00018798 | XLOC_014058 | 20946225 | 20946669 | + | 1 | NA           | CUFF.3090 | NA           | u       | TSS1492   | 3.311E-37 |
| chr10 TCONS_00018799 | XLOC_014064 | 21025460 | 21025664 | + | 1 | NA           | CUFF.3096 | NA           | u       | TSS1493   | 2.529E-33 |
| chr10 TCONS_00018806 | XLOC_014183 | 21864652 | 21865134 | + | 1 | OS10G0556200 | CUFF.3170 | OS10T05562(i | TSS1506 | 4.877E-38 |           |
| chr10 TCONS_00018808 | XLOC_014186 | 21885216 | 21885450 | + | 1 | NA           | CUFF.3148 | NA           | u       | TSS1506   | 0.01177   |
| chr10 TCONS_00018813 | XLOC_014195 | 21897546 | 21897848 | + | 1 | NA           | CUFF.3157 | NA           | u       | TSS1507   | 6.588E-29 |
| chr10 TCONS_00018817 | XLOC_014199 | 21902748 | 21903076 | + | 1 | OS10G0556700 | CUFF.3160 | OS10T05567(i | TSS1508 | 1.168E-26 |           |
| chr10 TCONS_00015802 | XLOC_014217 | 22005201 | 22005417 | + | 1 | NA           | CUFF.2497 | NA           | u       | TSS1510   | 3.19E-28  |
| chr10 TCONS_00018822 | XLOC_014219 | 22009180 | 22009419 | + | 1 | NA           | CUFF.3164 | NA           | u       | TSS1510   | 7.297E-19 |
| chr10 TCONS_00018824 | XLOC_014223 | 22019477 | 22019789 | + | 1 | OS10G0559500 | CUFF.3179 | OS10T05595(x | TSS1510 | 0.0071182 |           |
| chr10 TCONS_00018826 | XLOC_014228 | 22038946 | 22039238 | + | 1 | NA           | CUFF.3169 | NA           | u       | TSS1511   | 1.713E-27 |
| chr10 TCONS_00018827 | XLOC_014256 | 22235311 | 22235774 | + | 1 | NA           | CUFF.3192 | NA           | u       | TSS1514   | 3.414E-08 |

|                      |             |          |            |   |              |                        |   |         |           |
|----------------------|-------------|----------|------------|---|--------------|------------------------|---|---------|-----------|
| chr10 TCONS_00015863 | XLOC_014281 | 22341126 | 22341386 + | 1 | NA           | CUFF.2511 NA           | u | TSS1517 | 1.54E-48  |
| chr10 TCONS_00018832 | XLOC_014282 | 22342092 | 22342591 + | 1 | NA           | CUFF.3193 NA           | u | TSS1517 | 1.508E-30 |
| chr10 TCONS_00015865 | XLOC_014285 | 22344426 | 22344698 + | 1 | NA           | CUFF.2514 NA           | u | TSS1517 | 0.018843  |
| chr10 TCONS_00018840 | XLOC_014301 | 22360474 | 22360854 + | 1 | NA           | CUFF.3207 NA           | u | TSS1519 | 3.206E-38 |
| chr10 TCONS_00018841 | XLOC_014302 | 22362100 | 22362388 + | 1 | NA           | CUFF.3208 NA           | u | TSS1519 | 0.024257  |
| chr10 TCONS_00015939 | XLOC_014358 | 22699831 | 22700075 + | 1 | OS10G0572400 | CUFF.2556 OS10T05724(x |   | TSS1525 | 7.523E-18 |
| chr10 TCONS_00015940 | XLOC_014359 | 22700226 | 22700564 + | 1 | NA           | CUFF.2551 NA           | u | TSS1525 | 0.0001212 |
| chr10 TCONS_00015943 | XLOC_014363 | 22701457 | 22701659 + | 1 | NA           | CUFF.2554 NA           | u | TSS1525 | 2.292E-76 |
| chr10 TCONS_00018849 | XLOC_014377 | 22835814 | 22836017 + | 1 | NA           | CUFF.3241 NA           | u | TSS1527 | 6.268E-22 |
| chr10 TCONS_00015959 | XLOC_014381 | 22871069 | 22871573 + | 1 | OS10G0575200 | CUFF.2568 OS10T05752(x |   | TSS1527 | 5.644E-48 |
| chr10 TCONS_00018851 | XLOC_014383 | 22873798 | 22874058 + | 1 | NA           | CUFF.3249 NA           | u | TSS1528 | 0         |
| chr10 TCONS_00018854 | XLOC_014386 | 22875987 | 22876252 + | 1 | NA           | CUFF.3245 NA           | u | TSS1528 | 6.901E-52 |
| chr10 TCONS_00015980 | XLOC_014404 | 22997190 | 22997395 + | 1 | NA           | CUFF.2567 NA           | u | TSS1530 | 0         |
| chr10 TCONS_00018856 | XLOC_014405 | 23024165 | 23024374 + | 1 | NA           | CUFF.3254 NA           | u | TSS1530 | 1.063E-19 |
| chr10 TCONS_00018857 | XLOC_014409 | 23038851 | 23039059 + | 1 | OS10G0577800 | CUFF.3281 OS10T05778(i |   | TSS1530 | 3.414E-08 |
| chr10 TCONS_00016010 | XLOC_014433 | 23193166 | 23193374 + | 1 | OS10G0580900 | CUFF.2578 OS10T05809(x |   | TSS1533 | 0         |
| chr10 TCONS_00018859 | XLOC_014435 | 23199586 | 23199983 + | 1 | NA           | CUFF.3265 NA           | u | TSS1533 | 2.514E-28 |
| chr10 TCONS_00016012 | XLOC_014436 | 23200097 | 23200675 + | 1 | NA           | CUFF.2575 NA           | u | TSS1533 | 9.392E-54 |
| chr10 TCONS_00018864 | XLOC_014520 | 858905   | 859106 -   | 1 | NA           | CUFF.2346 NA           | u | TSS1542 | 7.187E-39 |
| chr10 TCONS_00018865 | XLOC_014521 | 859646   | 859852 -   | 1 | NA           | CUFF.2345 NA           | u | TSS1542 | 2.638E-18 |
| chr10 TCONS_00016161 | XLOC_014585 | 1468730  | 1468950 -  | 1 | NA           | CUFF.1831 NA           | u | TSS1549 | 0         |
| chr10 TCONS_00016162 | XLOC_014587 | 1469923  | 1470160 -  | 1 | NA           | CUFF.1830 NA           | u | TSS1549 | 1.918E-45 |
| chr10 TCONS_00018874 | XLOC_014590 | 1532981  | 1533725 -  | 1 | OS10G0124100 | CUFF.2380 OS10T01241(x |   | TSS1549 | 1.904E-38 |
| chr10 TCONS_00018876 | XLOC_014601 | 1650076  | 1650278 -  | 1 | NA           | CUFF.2376 NA           | u | TSS1550 | 2.869E-25 |
| chr10 TCONS_00018882 | XLOC_014691 | 2479150  | 2479447 -  | 1 | OS10G0140200 | CUFF.2416 OS10T01402(i |   | TSS1560 | 7.531E-07 |
| chr10 TCONS_00018886 | XLOC_014703 | 2555615  | 2556468 -  | 1 | OS10G0141700 | CUFF.2415 OS10T01417(i |   | TSS1561 | 0.86045   |
| chr10 TCONS_00018891 | XLOC_014781 | 3413981  | 3414197 -  | 1 | NA           | CUFF.2440 NA           | u | TSS1569 | 3.649E-52 |
| chr10 TCONS_00018896 | XLOC_014890 | 4630265  | 4630511 -  | 1 | NA           | CUFF.2464 NA           | u | TSS1580 | 4.127E-14 |
| chr10 TCONS_00016476 | XLOC_014891 | 4631278  | 4631480 -  | 1 | NA           | CUFF.1891 NA           | u | TSS1580 | 6.536E-78 |
| chr10 TCONS_00018897 | XLOC_014892 | 4631607  | 4631940 -  | 1 | NA           | CUFF.2465 NA           | u | TSS1581 | 5.393E-53 |
| chr10 TCONS_00018898 | XLOC_014893 | 4632205  | 4632436 -  | 1 | NA           | CUFF.2466 NA           | u | TSS1581 | 1.527E-35 |
| chr10 TCONS_00018902 | XLOC_014925 | 5218223  | 5218425 -  | 1 | NA           | CUFF.2477 NA           | u | TSS1584 | 1.527E-35 |
| chr10 TCONS_00018904 | XLOC_014941 | 5380691  | 5380960 -  | 1 | OS10G0178200 | CUFF.2484 OS10T01782(x |   | TSS1585 | 2.577E-56 |
| chr10 TCONS_00016549 | XLOC_014966 | 5733063  | 5733435 -  | 1 | OS10G0183900 | CUFF.1924 OS10T01839(i |   | TSS1588 | 1.218E-16 |
| chr10 TCONS_00016550 | XLOC_014967 | 5734394  | 5734639 -  | 1 | OS10G0183900 | CUFF.1925 OS10T01839(i |   | TSS1588 | 1.375E-11 |

|                      |             |          |            |   |              |                        |   |         |           |
|----------------------|-------------|----------|------------|---|--------------|------------------------|---|---------|-----------|
| chr10 TCONS_00018910 | XLOC_014976 | 5785951  | 5786177 -  | 1 | NA           | CUFF.2502 NA           | u | TSS1589 | 3.249E-27 |
| chr10 TCONS_00018911 | XLOC_014977 | 5786818  | 5787448 -  | 1 | NA           | CUFF.2511 NA           | u | TSS1589 | 0.005791  |
| chr10 TCONS_00016585 | XLOC_015005 | 6071405  | 6071628 -  | 1 | NA           | CUFF.1923 NA           | u | TSS1592 | 7.632E-32 |
| chr10 TCONS_00018915 | XLOC_015011 | 6108583  | 6108916 -  | 1 | OS10G0188300 | CUFF.2539 OS10T01883(x |   | TSS1593 | 5.016E-18 |
| chr10 TCONS_00018917 | XLOC_015013 | 6133595  | 6134235 -  | 1 | NA           | CUFF.2514 NA           | u | TSS1593 | 1.643E-15 |
| chr10 TCONS_00018922 | XLOC_015090 | 7251915  | 7252265 -  | 1 | NA           | CUFF.2537 NA           | u | TSS1601 | 2.654E-11 |
| chr10 TCONS_00016683 | XLOC_015105 | 7394618  | 7394824 -  | 1 | OS10G0203600 | CUFF.1948 OS10T02036(x |   | TSS1603 | 1.595E-53 |
| chr10 TCONS_00018929 | XLOC_015192 | 8724617  | 8724931 -  | 1 | NA           | CUFF.2565 NA           | u | TSS1612 | 1.518E-11 |
| chr10 TCONS_00018932 | XLOC_015199 | 8826535  | 8827688 -  | 1 | NA           | CUFF.2575 NA           | u | TSS1612 | 9.583E-18 |
| chr10 TCONS_00016778 | XLOC_015203 | 8901998  | 8902202 -  | 1 | OS10G0323000 | CUFF.1979 OS10T03230(i |   | TSS1613 | 0         |
| chr10 TCONS_00016779 | XLOC_015204 | 8911239  | 8911445 -  | 1 | NA           | CUFF.1972 NA           | u | TSS1613 | 6.775E-44 |
| chr10 TCONS_00016783 | XLOC_015208 | 8944044  | 8944258 -  | 1 | NA           | CUFF.1976 NA           | u | TSS1613 | 0         |
| chr10 TCONS_00016785 | XLOC_015211 | 8981055  | 8981279 -  | 1 | OS10G0324600 | CUFF.1980 OS10T03246(i |   | TSS1614 | 9.688E-29 |
| chr10 TCONS_00018934 | XLOC_015213 | 8996900  | 8997251 -  | 1 | LHP1         | CUFF.2572 OS10T03249(x |   | TSS1614 | 0.024257  |
| chr10 TCONS_00016802 | XLOC_015231 | 9166197  | 9166421 -  | 1 | NA           | CUFF.1981 NA           | u | TSS1616 | 2.717E-30 |
| chr10 TCONS_00018937 | XLOC_015238 | 9268943  | 9269415 -  | 1 | OS10G0329400 | CUFF.2585 OS10T03294(i |   | TSS1616 | 4.898E-64 |
| chr10 TCONS_00018941 | XLOC_015272 | 9773717  | 9773920 -  | 1 | OS10G0337500 | CUFF.2597 OS10T03375(i |   | TSS1620 | 2.859E-30 |
| chr10 TCONS_00018942 | XLOC_015279 | 9900578  | 9900785 -  | 1 | NA           | CUFF.2588 NA           | u | TSS1621 | 2.26E-21  |
| chr10 TCONS_00018949 | XLOC_015301 | 10090582 | 10091028 - | 1 | CSLH1        | CUFF.2616 OS10T03417(i |   | TSS1623 | 2.02E-19  |
| chr10 TCONS_00018953 | XLOC_015380 | 10837275 | 10837991 - | 1 | NA           | CUFF.2629 NA           | u | TSS1631 | 1.57E-08  |
| chr10 TCONS_00016947 | XLOC_015381 | 10838842 | 10839769 - | 1 | NA           | CUFF.2025 NA           | u | TSS1631 | 3.044E-75 |
| chr10 TCONS_00016955 | XLOC_015389 | 10863063 | 10863416 - | 1 | NA           | CUFF.2027 NA           | u | TSS1632 | 9.35E-50  |
| chr10 TCONS_00016962 | XLOC_015396 | 10878287 | 10878510 - | 1 | NA           | CUFF.2028 NA           | u | TSS1633 | 6.497E-27 |
| chr10 TCONS_00018954 | XLOC_015406 | 10909533 | 10911160 - | 1 | NCRNA_1515   | CUFF.5888 NCRNA_151:x  |   | TSS1634 | 7.39E-14  |
| chr10 TCONS_00018956 | XLOC_015425 | 11080923 | 11081363 - | 1 | OS10G0360600 | CUFF.6034 OS10T03606(i |   | TSS1636 | 3.56E-10  |
| chr10 TCONS_00016992 | XLOC_015426 | 11082566 | 11082770 - | 1 | OS10G0360600 | CUFF.2036 OS10T03606(i |   | TSS1636 | 0         |
| chr10 TCONS_00018959 | XLOC_015448 | 11279541 | 11280352 - | 1 | NA           | CUFF.6171 NA           | u | TSS1639 | 8.713E-12 |
| chr10 TCONS_00017018 | XLOC_015449 | 11280603 | 11280810 - | 1 | NA           | CUFF.2047 NA           | u | TSS1639 | 0.0009578 |
| chr10 TCONS_00017019 | XLOC_015450 | 11280923 | 11281291 - | 1 | NA           | CUFF.2044 NA           | u | TSS1639 | 2.661E-08 |
| chr10 TCONS_00017040 | XLOC_015474 | 11568323 | 11568529 - | 1 | NA           | CUFF.2061 NA           | u | TSS1641 | 3.657E-58 |
| chr10 TCONS_00018965 | XLOC_015477 | 11579840 | 11580931 - | 1 | NCRNA_1804   | CUFF.6254 NCRNA_180:x  |   | TSS1642 | 6.516E-10 |
| chr10 TCONS_00017083 | XLOC_015514 | 11984906 | 11985219 - | 1 | OS10G0376200 | CUFF.2091 OS10T03762(i |   | TSS1646 | 9.708E-34 |
| chr10 TCONS_00017121 | XLOC_015548 | 12329148 | 12329369 - | 1 | OS10G0382300 | CUFF.2101 OS10T03823(i |   | TSS1649 | 1.228E-30 |
| chr10 TCONS_00017148 | XLOC_015574 | 12837307 | 12837639 - | 1 | OS10G0388500 | CUFF.2116 OS10T03885(i |   | TSS1652 | 6.429E-84 |
| chr10 TCONS_00017149 | XLOC_015575 | 12838125 | 12838848 - | 1 | OS10G0388500 | CUFF.2117 OS10T03885(i |   | TSS1652 | 5.443E-46 |

|                      |             |          |          |   |   |              |                        |         |           |
|----------------------|-------------|----------|----------|---|---|--------------|------------------------|---------|-----------|
| chr10 TCONS_00017150 | XLOC_015576 | 12839491 | 12840119 | - | 1 | OS10G0388500 | CUFF.2118 OS10T03885(i | TSS1653 | 5.832E-57 |
| chr10 TCONS_00017151 | XLOC_015577 | 12840954 | 12841165 | - | 1 | OS10G0388500 | CUFF.2122 OS10T03885(i | TSS1653 | 0         |
| chr10 TCONS_00017152 | XLOC_015578 | 12842740 | 12842960 | - | 1 | OS10G0388500 | CUFF.2124 OS10T03885(i | TSS1653 | 0         |
| chr10 TCONS_00018971 | XLOC_015580 | 12865221 | 12865433 | - | 1 | NCRNA_5086   | CUFF.2670 NCRNA_508(x  | TSS1653 | 9.369E-17 |
| chr10 TCONS_00018972 | XLOC_015599 | 12983413 | 12984076 | - | 1 | OS10G0390701 | CUFF.2678 OS10T03907(x | TSS1655 | 4.568E-12 |
| chr10 TCONS_00017180 | XLOC_015603 | 13010218 | 13010930 | - | 1 | NA           | CUFF.2121 NA u         | TSS1655 | 2.154E-25 |
| chr10 TCONS_00018975 | XLOC_015605 | 13011684 | 13012097 | - | 1 | OS10G0391100 | CUFF.2681 OS10T03911(x | TSS1656 | 3.839E-19 |
| chr10 TCONS_00017251 | XLOC_015665 | 13543928 | 13544305 | - | 1 | OS10G0400900 | CUFF.2140 OS10T04009(i | TSS1662 | 5.848E-09 |
| chr10 TCONS_00017342 | XLOC_015756 | 14242906 | 14243184 | - | 1 | NA           | CUFF.2151 NA u         | TSS1672 | 0         |
| chr10 TCONS_00017343 | XLOC_015758 | 14248166 | 14248505 | - | 1 | NA           | CUFF.2154 NA u         | TSS1672 | 4.829E-23 |
| chr10 TCONS_00017346 | XLOC_015761 | 14251685 | 14251900 | - | 1 | NA           | CUFF.2153 NA u         | TSS1672 | 6.078E-62 |
| chr10 TCONS_00018991 | XLOC_015776 | 14331544 | 14331791 | - | 1 | NA           | CUFF.2724 NA u         | TSS1674 | 4.766E-28 |
| chr10 TCONS_00017383 | XLOC_015799 | 14534677 | 14535262 | - | 1 | OS10G0415600 | CUFF.2180 OS10T04156(i | TSS1677 | 2.395E-42 |
| chr10 TCONS_00018994 | XLOC_015799 | 14535152 | 14535836 | - | 1 | OS10G0415600 | CUFF.2756 OS10T04156(i | TSS1677 | 2.977E-07 |
| chr10 TCONS_00017385 | XLOC_015800 | 14545719 | 14545936 | - | 1 | OS10G0415800 | CUFF.2167 OS10T04158(x | TSS1677 | 1.357E-39 |
| chr10 TCONS_00017390 | XLOC_015805 | 14601597 | 14601816 | - | 1 | NA           | CUFF.2168 NA u         | TSS1677 | 1.979E-50 |
| chr10 TCONS_00018998 | XLOC_015855 | 15048357 | 15048559 | - | 1 | NA           | CUFF.2752 NA u         | TSS1682 | 6.268E-22 |
| chr10 TCONS_00017439 | XLOC_015857 | 15074774 | 15075007 | - | 1 | NA           | CUFF.2185 NA u         | TSS1682 | 2.235E-14 |
| chr10 TCONS_00019002 | XLOC_015881 | 15367272 | 15367622 | - | 1 | NA           | CUFF.2763 NA u         | TSS1685 | 3.718E-24 |
| chr10 TCONS_00019003 | XLOC_015882 | 15368861 | 15369072 | - | 1 | NA           | CUFF.2762 NA u         | TSS1685 | 1.399E-43 |
| chr10 TCONS_00019009 | XLOC_015942 | 15828465 | 15828783 | - | 1 | NA           | CUFF.2781 NA u         | TSS1691 | 3.325E-17 |
| chr10 TCONS_00017557 | XLOC_015972 | 16095574 | 16095820 | - | 1 | OS10G0445500 | CUFF.2222 OS10T04455(i | TSS1695 | 1.159E-09 |
| chr10 TCONS_00017562 | XLOC_015977 | 16133498 | 16133712 | - | 1 | NA           | CUFF.2219 NA u         | TSS1695 | 8.968E-51 |
| chr10 TCONS_00017576 | XLOC_015990 | 16265572 | 16265800 | - | 1 | NA           | CUFF.2225 NA u         | TSS1696 | 5.185E-37 |
| chr10 TCONS_00019014 | XLOC_016017 | 16660508 | 16660952 | - | 1 | NA           | CUFF.2812 NA u         | TSS1699 | 1.991E-12 |
| chr10 TCONS_00017615 | XLOC_016029 | 16750986 | 16751198 | - | 1 | OS10G0457000 | CUFF.2251 OS10T04570(i | TSS1700 | 1.772E-74 |
| chr10 TCONS_00019025 | XLOC_016125 | 17608338 | 17609072 | - | 1 | NA           | CUFF.2880 NA u         | TSS1711 | 3.147E-44 |
| chr10 TCONS_00019029 | XLOC_016128 | 17611454 | 17611770 | - | 1 | NA           | CUFF.2885 NA u         | TSS1712 | 3.721E-34 |
| chr10 TCONS_00019030 | XLOC_016145 | 17757253 | 17757483 | - | 1 | OS10G0476600 | CUFF.2900 OS10T04766(i | TSS1713 | 2.217E-31 |
| chr10 TCONS_00019031 | XLOC_016146 | 17758269 | 17758644 | - | 1 | OS10G0476600 | CUFF.2903 OS10T04766(i | TSS1714 | 6.821E-10 |
| chr10 TCONS_00019034 | XLOC_016155 | 17789281 | 17789573 | - | 1 | OS10G0477000 | CUFF.2913 OS10T04770(i | TSS1715 | 7.056E-24 |
| chr10 TCONS_00019042 | XLOC_016194 | 18034557 | 18034928 | - | 1 | NA           | CUFF.2909 NA u         | TSS1719 | 4.293E-21 |
| chr10 TCONS_00017787 | XLOC_016199 | 18037529 | 18037699 | - | 1 | NCRNA_42041  | CUFF.2306 NCRNA_420(x  | TSS1719 | 0.029675  |
| chr10 TCONS_00019043 | XLOC_016199 | 18037540 | 18037792 | - | 1 | NA           | CUFF.2911 NA u         | TSS1719 | 1.549E-20 |
| chr10 TCONS_00019044 | XLOC_016199 | 18038344 | 18038581 | - | 1 | NA           | CUFF.2915 NA u         | TSS1719 | 4.716E-58 |

|                      |             |          |          |   |   |              |                        |         |                   |
|----------------------|-------------|----------|----------|---|---|--------------|------------------------|---------|-------------------|
| chr10 TCONS_00019047 | XLOC_016249 | 18421219 | 18421506 | - | 1 | OS10G0486900 | CUFF.2936 OS10T04869(x | TSS1724 | 2.217E-31         |
| chr10 TCONS_00019049 | XLOC_016252 | 18452862 | 18453228 | - | 1 | OS10G0487600 | CUFF.2941 OS10T04876(i | TSS1725 | 0.051036          |
| chr10 TCONS_00017845 | XLOC_016259 | 18531315 | 18531520 | - | 1 | NA           | CUFF.2321 NA           | u       | TSS1725 1.095E-81 |
| chr10 TCONS_00017846 | XLOC_016260 | 18531714 | 18531947 | - | 1 | NA           | CUFF.2319 NA           | u       | TSS1725 1.315E-08 |
| chr10 TCONS_00019053 | XLOC_016276 | 18657236 | 18657440 | - | 1 | OS10G0491400 | CUFF.2947 OS10T04914(x | TSS1727 | 2.638E-18         |
| chr10 TCONS_00019056 | XLOC_016290 | 18736403 | 18736757 | - | 1 | OS10G0493600 | CUFF.2974 OS10T04936(i | TSS1729 | 2.817E-86         |
| chr10 TCONS_00017902 | XLOC_016314 | 18877145 | 18877360 | - | 1 | NA           | CUFF.2339 NA           | u       | TSS1731 2.741E-25 |
| chr10 TCONS_00017903 | XLOC_016315 | 18877463 | 18877761 | - | 1 | NA           | CUFF.2340 NA           | u       | TSS1731 1.657E-47 |
| chr10 TCONS_00017910 | XLOC_016323 | 18915848 | 18916057 | - | 1 | NA           | CUFF.2343 NA           | u       | TSS1732 1.345E-78 |
| chr10 TCONS_00019062 | XLOC_016346 | 19053661 | 19054047 | - | 1 | NA           | CUFF.2976 NA           | u       | TSS1735 6.667E-12 |
| chr10 TCONS_00017931 | XLOC_016347 | 19054465 | 19054937 | - | 1 | NA           | CUFF.2357 NA           | u       | TSS1735 0         |
| chr10 TCONS_00019063 | XLOC_016347 | 19054366 | 19054821 | - | 1 | NA           | CUFF.2977 NA           | u       | TSS1735 0         |
| chr10 TCONS_00019066 | XLOC_016360 | 19131484 | 19132721 | - | 1 | OS10G0501500 | CUFF.2982 OS10T05015(x | TSS1736 | 9.145E-23         |
| chr10 TCONS_00019073 | XLOC_016415 | 19557690 | 19557963 | - | 1 | OS10G0509100 | CUFF.3016 OS10T05091(i | TSS1743 | 1.742E-55         |
| chr10 TCONS_00019074 | XLOC_016432 | 19677627 | 19677882 | - | 1 | OS10G0511400 | CUFF.3015 OS10T05114(i | TSS1744 | 2.497E-05         |
| chr10 TCONS_00019076 | XLOC_016436 | 19705223 | 19705500 | - | 1 | NA           | CUFF.3007 NA           | u       | TSS1745 0.024257  |
| chr10 TCONS_00019079 | XLOC_016439 | 19710118 | 19710507 | - | 1 | NA           | CUFF.3010 NA           | u       | TSS1745 2.66E-34  |
| chr10 TCONS_00019080 | XLOC_016440 | 19710593 | 19711148 | - | 1 | NA           | CUFF.3011 NA           | u       | TSS1745 6.058E-25 |
| chr10 TCONS_00019084 | XLOC_016473 | 19997708 | 19998137 | - | 1 | OS10G0517400 | CUFF.3038 OS10T05174(x | TSS1749 | 3.839E-19         |
| chr10 TCONS_00018073 | XLOC_016490 | 20110132 | 20110334 | - | 1 | OS10G0520100 | CUFF.2391 OS10T05201(x | TSS1750 | 1.073E-53         |
| chr10 TCONS_00018098 | XLOC_016514 | 20254440 | 20254842 | - | 1 | NA           | CUFF.2399 NA           | u       | TSS1753 1.703E-36 |
| chr10 TCONS_00019093 | XLOC_016514 | 20253922 | 20254558 | - | 1 | NA           | CUFF.3058 NA           | u       | TSS1753 6.746E-06 |
| chr10 TCONS_00018111 | XLOC_016527 | 20374701 | 20375356 | - | 1 | OS10G0524300 | CUFF.2403 OS10T05243(x | TSS1755 | 4.974E-06         |
| chr10 TCONS_00019097 | XLOC_016545 | 20463753 | 20464004 | - | 1 | NA           | CUFF.3072 NA           | u       | TSS1757 1.179E-54 |
| chr10 TCONS_00018165 | XLOC_016580 | 20770619 | 20770974 | - | 1 | OS10G0533900 | CUFF.2425 OS10T05339(i | TSS1760 | 1.315E-66         |
| chr10 TCONS_00018186 | XLOC_016598 | 20888066 | 20888288 | - | 1 | OS10G0536400 | CUFF.2438 OS10T05364(i | TSS1762 | 7.143E-38         |
| chr10 TCONS_00019105 | XLOC_016600 | 20889031 | 20889551 | - | 1 | OS10G0536400 | CUFF.3106 OS10T05364(i | TSS1763 | 1.536E-20         |
| chr10 TCONS_00019107 | XLOC_016604 | 20890942 | 20891143 | - | 1 | OS10G0536400 | CUFF.3116 OS10T05364(x | TSS1763 | 1.339E-23         |
| chr10 TCONS_00018207 | XLOC_016620 | 21005071 | 21005319 | - | 1 | NA           | CUFF.2440 NA           | u       | TSS1765 1.356E-15 |
| chr10 TCONS_00018222 | XLOC_016634 | 21070694 | 21070923 | - | 1 | OS10G0540300 | CUFF.2446 OS10T05403(i | TSS1766 | 3.233E-38         |
| chr10 TCONS_00019110 | XLOC_016640 | 21130614 | 21130820 | - | 1 | NA           | CUFF.3102 NA           | u       | TSS1767 1.25E-16  |
| chr10 TCONS_00019114 | XLOC_016652 | 21200455 | 21200526 | - | 1 | NA           | CUFF.3104 NA           | u       | TSS1768 9.301E-15 |
| chr10 TCONS_00018241 | XLOC_016654 | 21203037 | 21203248 | - | 1 | NA           | CUFF.2449 NA           | u       | TSS1768 8.074E-47 |
| chr10 TCONS_00019116 | XLOC_016669 | 21295983 | 21296254 | - | 1 | OS10G0544900 | CUFF.3121 OS10T05449(i | TSS1770 | 2.529E-33         |
| chr10 TCONS_00018267 | XLOC_016681 | 21396825 | 21397060 | - | 1 | NA           | CUFF.2460 NA           | u       | TSS1771 6.529E-34 |

|                      |             |          |          |   |   |              |                        |         |           |
|----------------------|-------------|----------|----------|---|---|--------------|------------------------|---------|-----------|
| chr10 TCONS_00019118 | XLOC_016712 | 21573225 | 21573495 | - | 1 | NCRNA_5185   | CUFF.3130 NCRNA_518:x  | TSS1775 | 6.161E-27 |
| chr10 TCONS_00018327 | XLOC_016738 | 21732481 | 21732688 | - | 1 | OS10G0553900 | CUFF.2474 OS10T05539(i | TSS1777 | 0         |
| chr10 TCONS_00019125 | XLOC_016758 | 21876467 | 21876670 | - | 1 | NA           | CUFF.3145 NA u         | TSS1780 | 2.638E-18 |
| chr10 TCONS_00019126 | XLOC_016764 | 21913686 | 21913960 | - | 1 | OS10G0556900 | CUFF.3176 OS10T05569(i | TSS1780 | 2.943E-20 |
| chr10 TCONS_00019135 | XLOC_016835 | 22313013 | 22313435 | - | 1 | OS10G0564900 | CUFF.3201 OS10T05649(i | TSS1788 | 4.397E-07 |
| chr10 TCONS_00018428 | XLOC_016836 | 22320201 | 22320433 | - | 1 | OS10G0565000 | CUFF.2509 OS10T05650(x | TSS1788 | 8.316E-26 |
| chr10 TCONS_00019139 | XLOC_016876 | 22582284 | 22582885 | - | 1 | OS10G0569600 | CUFF.3240 OS10T05696(x | TSS1792 | 1.504E-10 |
| chr10 TCONS_00018473 | XLOC_016879 | 22596673 | 22596895 | - | 1 | NA           | CUFF.2545 NA u         | TSS1793 | 3.935E-46 |
| chr10 TCONS_00019149 | XLOC_016932 | 22938968 | 22939254 | - | 1 | OS10G0576000 | CUFF.3251 OS10T05760(x | TSS1799 | 0         |
| chr10 TCONS_00018540 | XLOC_016948 | 23057840 | 23058079 | - | 1 | OS10G0578050 | CUFF.2573 OS10T05780(i | TSS1800 | 9.83E-24  |
| chr10 TCONS_00018541 | XLOC_016950 | 23062807 | 23063025 | - | 1 | NA           | CUFF.2570 NA u         | TSS1800 | 0         |
| chr10 TCONS_00019154 | XLOC_016951 | 23063044 | 23063489 | - | 1 | NA           | CUFF.3257 NA u         | TSS1801 | 1.512E-25 |
| chr10 TCONS_00018567 | XLOC_016978 | 7699322  | 7699535  | . | 1 | OS10G0208600 | CUFF.1966 OS10T02086(i | TSS1803 | 2.074E-19 |
| chr10 TCONS_00018568 | XLOC_016981 | 11195725 | 11195938 | . | 1 | OS10G0362300 | CUFF.2067 OS10T03623(i | TSS1804 | 1.291E-45 |
| chr10 TCONS_00019163 | XLOC_016984 | 11568234 | 11568438 | . | 1 | NA           | CUFF.6249 NA u         | TSS1804 | 1.17E-31  |
| chr10 TCONS_00019164 | XLOC_016985 | 11631532 | 11631739 | . | 1 | OS10G0370000 | CUFF.6257 OS10T03700(i | TSS1804 | 5.016E-18 |
| chr10 TCONS_00019165 | XLOC_016986 | 11669914 | 11670117 | . | 1 | OS10G0370500 | CUFF.6259 OS10T03705(i | TSS1804 | 2.943E-20 |
| chr10 TCONS_00018569 | XLOC_016988 | 16232432 | 16232637 | . | 1 | OS10G0447900 | CUFF.2227 OS10T04479(i | TSS1804 | 1.575E-70 |
| chr11 TCONS_00019190 | XLOC_017008 | 122276   | 122488   | + | 1 | OS11G0102900 | CUFF.2590 OS11T01029(x | TSS1807 | 2.146E-33 |
| chr11 TCONS_00025741 | XLOC_017022 | 202019   | 202374   | + | 1 | OS11G0104400 | CUFF.3279 OS11T01044(i | TSS1808 | 1.965E-34 |
| chr11 TCONS_00019296 | XLOC_017108 | 730915   | 731573   | + | 1 | OS11G0116300 | CUFF.2614 OS11T01163(i | TSS1817 | 2.44E-43  |
| chr11 TCONS_00019375 | XLOC_017187 | 1383695  | 1383915  | + | 1 | OS11G0130100 | CUFF.2620 OS11T01301(i | TSS1826 | 3.518E-53 |
| chr11 TCONS_00025755 | XLOC_017211 | 1559406  | 1559710  | + | 1 | NA           | CUFF.3344 NA u         | TSS1828 | 1.027E-29 |
| chr11 TCONS_00025761 | XLOC_017239 | 1718788  | 1719020  | + | 1 | OS11G0137250 | CUFF.3348 OS11T01372(x | TSS1831 | 1.654E-63 |
| chr11 TCONS_00025762 | XLOC_017240 | 1733130  | 1733501  | + | 1 | OS11G0137300 | CUFF.3355 OS11T01373(x | TSS1831 | 5.476E-35 |
| chr11 TCONS_00025765 | XLOC_017256 | 1832573  | 1835954  | + | 1 | OS11G0139700 | CUFF.3428 OS11T01397(x | TSS1833 | 0         |
| chr11 TCONS_00025766 | XLOC_017257 | 1843643  | 1844188  | + | 1 | OS11G0139900 | CUFF.3373 OS11T01399(i | TSS1833 | 3.713E-24 |
| chr11 TCONS_00025767 | XLOC_017258 | 1844780  | 1845354  | + | 1 | OS11G0139900 | CUFF.3380 OS11T01399(i | TSS1833 | 7.297E-19 |
| chr11 TCONS_00025768 | XLOC_017259 | 1845624  | 1846792  | + | 1 | OS11G0139900 | CUFF.3382 OS11T01399(i | TSS1833 | 0.23512   |
| chr11 TCONS_00019440 | XLOC_017260 | 1847007  | 1847238  | + | 1 | OS11G0139900 | CUFF.2641 OS11T01399(i | TSS1833 | 9.708E-34 |
| chr11 TCONS_00019442 | XLOC_017262 | 1868797  | 1869113  | + | 1 | NA           | CUFF.2635 NA u         | TSS1834 | 0         |
| chr11 TCONS_00019444 | XLOC_017264 | 1871326  | 1871588  | + | 1 | OS11G0140600 | CUFF.2651 OS11T01406(i | TSS1834 | 3.296E-88 |
| chr11 TCONS_00025775 | XLOC_017305 | 2149505  | 2149784  | + | 1 | OS11G0147150 | CUFF.3379 OS11T01471(i | TSS1838 | 4.874E-69 |
| chr11 TCONS_00025777 | XLOC_017307 | 2150444  | 2150799  | + | 1 | OS11G0147150 | CUFF.3381 OS11T01471(i | TSS1839 | 2.248E-36 |
| chr11 TCONS_00019502 | XLOC_017319 | 2252880  | 2253421  | + | 1 | NA           | CUFF.2659 NA u         | TSS1840 | 1.263E-11 |



|                      |             |          |            |   |              |                        |   |         |           |
|----------------------|-------------|----------|------------|---|--------------|------------------------|---|---------|-----------|
| chr11 TCONS_00019503 | XLOC_017320 | 2253972  | 2254465 +  | 1 | NA           | CUFF.2663 NA           | u | TSS1840 | 1.154E-48 |
| chr11 TCONS_00025781 | XLOC_017320 | 2254001  | 2254468 +  | 1 | NA           | CUFF.3388 NA           | u | TSS1840 | 5.958E-36 |
| chr11 TCONS_00019504 | XLOC_017324 | 2258322  | 2258550 +  | 1 | NA           | CUFF.2661 NA           | u | TSS1840 | 2.146E-33 |
| chr11 TCONS_00019552 | XLOC_017369 | 2610399  | 2610615 +  | 1 | OS11G0155600 | CUFF.2675 OS11T01556(i |   | TSS1845 | 0         |
| chr11 TCONS_00019589 | XLOC_017405 | 2862295  | 2862513 +  | 1 | OS11G0159000 | CUFF.2686 OS11T01590(i |   | TSS1849 | 0         |
| chr11 TCONS_00025792 | XLOC_017407 | 2864424  | 2864736 +  | 1 | OS11G0159000 | CUFF.3421 OS11T01590(i |   | TSS1849 | 0.024257  |
| chr11 TCONS_00025793 | XLOC_017414 | 2914813  | 2915032 +  | 1 | OS11G0160100 | CUFF.3422 OS11T01601(i |   | TSS1850 | 3.047E-45 |
| chr11 TCONS_00025794 | XLOC_017441 | 3118198  | 3118534 +  | 1 | NA           | CUFF.3424 NA           | u | TSS1853 | 1.043E-12 |
| chr11 TCONS_00025795 | XLOC_017472 | 3307325  | 3307667 +  | 1 | OS11G0168500 | CUFF.3434 OS11T01685(x |   | TSS1856 | 1.063E-19 |
| chr11 TCONS_00025803 | XLOC_017569 | 4154874  | 4155075 +  | 1 | NA           | CUFF.3477 NA           | u | TSS1866 | 1.339E-23 |
| chr11 TCONS_00025806 | XLOC_017573 | 4190634  | 4191105 +  | 1 | NA           | CUFF.3481 NA           | u | TSS1867 | 5.361E-22 |
| chr11 TCONS_00019846 | XLOC_017656 | 4992318  | 4992521 +  | 1 | OS11G0199600 | CUFF.2755 OS11T01996(i |   | TSS1875 | 0         |
| chr11 TCONS_00019937 | XLOC_017741 | 5631574  | 5631878 +  | 1 | OS11G0209502 | CUFF.2780 OS11T02095(i |   | TSS1884 | 3.46E-27  |
| chr11 TCONS_00019945 | XLOC_017751 | 5674586  | 5674806 +  | 1 | OS11G0209900 | CUFF.2784 OS11T02099(i |   | TSS1885 | 9.037E-25 |
| chr11 TCONS_00025821 | XLOC_017764 | 5792402  | 5792753 +  | 1 | NA           | CUFF.3552 NA           | u | TSS1887 | 4.757E-15 |
| chr11 TCONS_00025835 | XLOC_017921 | 7207829  | 7208036 +  | 1 | NA           | CUFF.3593 NA           | u | TSS1903 | 4.766E-28 |
| chr11 TCONS_00020145 | XLOC_017956 | 7587747  | 7587962 +  | 1 | OS11G0241900 | CUFF.2831 OS11T02419(i |   | TSS1907 | 3.559E-42 |
| chr11 TCONS_00025841 | XLOC_017976 | 7758420  | 7758620 +  | 1 | NA           | CUFF.3617 NA           | u | TSS1909 | 7.056E-24 |
| chr11 TCONS_00025842 | XLOC_017977 | 7758786  | 7759466 +  | 1 | NA           | CUFF.3618 NA           | u | TSS1909 | 7.651E-15 |
| chr11 TCONS_00025844 | XLOC_017988 | 7821962  | 7822225 +  | 1 | OS11G0245500 | CUFF.3630 OS11T02455(i |   | TSS1910 | 4.877E-38 |
| chr11 TCONS_00025846 | XLOC_018020 | 8102468  | 8102675 +  | 1 | OS11G0250000 | CUFF.3644 OS11T02500(i |   | TSS1913 | 4.791E-33 |
| chr11 TCONS_00025847 | XLOC_018023 | 8132814  | 8133053 +  | 1 | OS11G0250400 | CUFF.3662 OS11T02504(i |   | TSS1914 | 1.965E-34 |
| chr11 TCONS_00025848 | XLOC_018026 | 8167147  | 8167567 +  | 1 | OS11G0251400 | CUFF.3664 OS11T02514(i |   | TSS1914 | 2.627E-82 |
| chr11 TCONS_00025850 | XLOC_018037 | 8302075  | 8302278 +  | 1 | NA           | CUFF.3647 NA           | u | TSS1915 | 2.638E-18 |
| chr11 TCONS_00025853 | XLOC_018046 | 8422045  | 8422276 +  | 1 | OS11G0256050 | CUFF.3660 OS11T02560(i |   | TSS1916 | 1.361E-38 |
| chr11 TCONS_00020233 | XLOC_018049 | 8450654  | 8450887 +  | 1 | NA           | CUFF.2851 NA           | u | TSS1916 | 8.985E-35 |
| chr11 TCONS_00020285 | XLOC_018101 | 9006909  | 9007138 +  | 1 | OS11G0264700 | CUFF.2874 OS11T02647(x |   | TSS1922 | 1.827E-30 |
| chr11 TCONS_00025859 | XLOC_018113 | 9114208  | 9114725 +  | 1 | OS11G0266000 | CUFF.3683 OS11T02660(x |   | TSS1923 | 7.297E-19 |
| chr11 TCONS_00020332 | XLOC_018146 | 9426631  | 9426840 +  | 1 | OS11G0270500 | CUFF.2896 OS11T02705(i |   | TSS1926 | 2.957E-61 |
| chr11 TCONS_00020363 | XLOC_018179 | 9819551  | 9819765 +  | 1 | OS11G0276300 | CUFF.2902 OS11T02763(i |   | TSS1930 | 5.435E-47 |
| chr11 TCONS_00025869 | XLOC_018250 | 10655396 | 10655632 + | 1 | NA           | CUFF.3721 NA           | u | TSS1937 | 1.033E-24 |
| chr11 TCONS_00025870 | XLOC_018256 | 10741701 | 10742598 + | 1 | OS11G0293900 | CUFF.3737 OS11T02939(i |   | TSS1937 | 4.733E-25 |
| chr11 TCONS_00020439 | XLOC_018257 | 10744169 | 10744442 + | 1 | OS11G0293900 | CUFF.2925 OS11T02939(i |   | TSS1937 | 7.522E-18 |
| chr11 TCONS_00020444 | XLOC_018261 | 10790257 | 10790587 + | 1 | OS11G0294600 | CUFF.2922 OS11T02946(i |   | TSS1938 | 0         |
| chr11 TCONS_00025872 | XLOC_018261 | 10790084 | 10790414 + | 1 | OS11G0294600 | CUFF.3764 OS11T02946(i |   | TSS1938 | 3.907E-44 |

|                      |             |          |          |   |   |              |           |               |         |           |           |
|----------------------|-------------|----------|----------|---|---|--------------|-----------|---------------|---------|-----------|-----------|
| chr11 TCONS_00025875 | XLOC_018322 | 11444320 | 11444531 | + | 1 | OS11G0303800 | CUFF.3782 | OS11T030380(i | TSS1945 | 3.405E-06 |           |
| chr11 TCONS_00025876 | XLOC_018323 | 11445148 | 11445477 | + | 1 | OS11G0303800 | CUFF.3787 | OS11T030380(i | TSS1945 | 6.821E-10 |           |
| chr11 TCONS_00020530 | XLOC_018342 | 11714197 | 11714398 | + | 1 | OS11G0307950 | CUFF.2937 | OS11T030795(i | TSS1947 | 1.541E-10 |           |
| chr11 TCONS_00020533 | XLOC_018346 | 11745619 | 11745858 | + | 1 | NA           | CUFF.2938 | NA            | u       | TSS1947   | 7.06E-28  |
| chr11 TCONS_00025879 | XLOC_018347 | 11745936 | 11746283 | + | 1 | NA           | CUFF.3780 | NA            | u       | TSS1947   | 2.165E-14 |
| chr11 TCONS_00025882 | XLOC_018352 | 11750080 | 11750572 | + | 1 | OS11G0308266 | CUFF.3788 | OS11T030826(i | TSS1948 | 4.127E-14 |           |
| chr11 TCONS_00020537 | XLOC_018355 | 11754592 | 11755033 | + | 1 | NA           | CUFF.2940 | NA            | u       | TSS1948   | 3.407E-07 |
| chr11 TCONS_00025886 | XLOC_018356 | 11758760 | 11758973 | + | 1 | NA           | CUFF.3772 | NA            | u       | TSS1948   | 2.113E-62 |
| chr11 TCONS_00020538 | XLOC_018357 | 11759863 | 11760064 | + | 1 | NA           | CUFF.2943 | NA            | u       | TSS1949   | 0         |
| chr11 TCONS_00025887 | XLOC_018357 | 11759417 | 11759979 | + | 1 | NA           | CUFF.3773 | NA            | u       | TSS1948   | 9.077E-33 |
| chr11 TCONS_00025890 | XLOC_018372 | 11957009 | 11957411 | + | 1 | OS11G0311100 | CUFF.3779 | OS11T031110(x | TSS1950 | 1.033E-24 |           |
| chr11 TCONS_00025894 | XLOC_018625 | 12635981 | 12636197 | + | 1 | OS11G0414000 | CUFF.3809 | OS11T041400(i | TSS1975 | 3.127E-63 |           |
| chr11 TCONS_00025898 | XLOC_018655 | 13281230 | 13281943 | + | 1 | NA           | CUFF.3800 | NA            | u       | TSS1978   | 1.041E-09 |
| chr11 TCONS_00025899 | XLOC_018656 | 13282092 | 13282396 | + | 1 | NA           | CUFF.3797 | NA            | u       | TSS1979   | 6.268E-22 |
| chr11 TCONS_00025902 | XLOC_018679 | 13635716 | 13635924 | + | 1 | OS11G0427500 | CUFF.3808 | OS11T042750(i | TSS1981 | 2.26E-21  |           |
| chr11 TCONS_00020876 | XLOC_018702 | 13853409 | 13853885 | + | 1 | NA           | CUFF.2960 | NA            | u       | TSS1983   | 5.617E-52 |
| chr11 TCONS_00020878 | XLOC_018705 | 13862345 | 13862715 | + | 1 | NA           | CUFF.2959 | NA            | u       | TSS1984   | 3.599E-09 |
| chr11 TCONS_00021051 | XLOC_018865 | 15796489 | 15796690 | + | 1 | NA           | CUFF.2988 | NA            | u       | TSS2000   | 0         |
| chr11 TCONS_00021088 | XLOC_018899 | 16218792 | 16219032 | + | 1 | NA           | CUFF.2997 | NA            | u       | TSS2004   | 7.74E-10  |
| chr11 TCONS_00021089 | XLOC_018901 | 16221804 | 16222011 | + | 1 | NA           | CUFF.2998 | NA            | u       | TSS2004   | 6.217E-73 |
| chr11 TCONS_00021114 | XLOC_018927 | 16428904 | 16429160 | + | 1 | NA           | CUFF.3003 | NA            | u       | TSS2007   | 0         |
| chr11 TCONS_00021121 | XLOC_018932 | 16440269 | 16440708 | + | 1 | KSL8         | CUFF.3026 | OS11T04748(x  | TSS2007 | 1.596E-50 |           |
| chr11 TCONS_00021126 | XLOC_018937 | 16460878 | 16461101 | + | 1 | OS11G0475200 | CUFF.3018 | OS11T047520(i | TSS2008 | 1.062E-37 |           |
| chr11 TCONS_00025922 | XLOC_018959 | 16789394 | 16789724 | + | 1 | NA           | CUFF.3883 | NA            | u       | TSS2010   | 7.264E-12 |
| chr11 TCONS_00025924 | XLOC_018969 | 16918969 | 16919182 | + | 1 | OS11G0482000 | CUFF.3906 | OS11T048200(i | TSS2011 | 1.307E-09 |           |
| chr11 TCONS_00021187 | XLOC_018997 | 17132097 | 17132335 | + | 1 | NA           | CUFF.3030 | NA            | u       | TSS2014   | 1.839E-35 |
| chr11 TCONS_00021190 | XLOC_019000 | 17176566 | 17176781 | + | 1 | NA           | CUFF.3031 | NA            | u       | TSS2015   | 5.596E-36 |
| chr11 TCONS_00021274 | XLOC_019087 | 18077318 | 18077531 | + | 1 | NA           | CUFF.3050 | NA            | u       | TSS2024   | 1.611E-42 |
| chr11 TCONS_00021309 | XLOC_019118 | 18429592 | 18429812 | + | 1 | NA           | CUFF.3061 | NA            | u       | TSS2027   | 1.871E-40 |
| chr11 TCONS_00025938 | XLOC_019123 | 18436939 | 18437540 | + | 1 | NA           | CUFF.3946 | NA            | u       | TSS2027   | 0.20934   |
| chr11 TCONS_00025939 | XLOC_019126 | 18463971 | 18464287 | + | 1 | OS11G0515000 | CUFF.3950 | OS11T051500(x | TSS2028 | 1.512E-25 |           |
| chr11 TCONS_00021371 | XLOC_019184 | 19082764 | 19082965 | + | 1 | OS11G0525900 | CUFF.3077 | OS11T052590(x | TSS2034 | 2.507E-69 |           |
| chr11 TCONS_00025947 | XLOC_019249 | 19575680 | 19576101 | + | 1 | OS11G0536800 | CUFF.3979 | OS11T053680(x | TSS2040 | 1.136E-14 |           |
| chr11 TCONS_00021443 | XLOC_019254 | 19590216 | 19590458 | + | 1 | OS11G0537375 | CUFF.3140 | OS11T053737(i | TSS2041 | 5.047E-18 |           |
| chr11 TCONS_00021444 | XLOC_019255 | 19590531 | 19590745 | + | 1 | OS11G0537375 | CUFF.3141 | OS11T053737(i | TSS2041 | 5.435E-47 |           |

|                      |             |          |          |   |   |              |                          |         |           |
|----------------------|-------------|----------|----------|---|---|--------------|--------------------------|---------|-----------|
| chr11 TCONS_00025948 | XLOC_019256 | 19591779 | 19591980 | + | 1 | OS11G0537375 | CUFF.4033 OS11T0537375(i | TSS2041 | 1.387E-18 |
| chr11 TCONS_00021455 | XLOC_019266 | 19716041 | 19716267 | + | 1 | OS11G0539800 | CUFF.3991 OS11T0539800(x | TSS2042 | 0         |
| chr11 TCONS_00025953 | XLOC_019271 | 19730791 | 19731250 | + | 1 | OS11G0540100 | CUFF.4022 OS11T0540100(i | TSS2043 | 1.448E-48 |
| chr11 TCONS_00025955 | XLOC_019294 | 19978322 | 19978525 | + | 1 | NA           | CUFF.3988 NA u           | TSS2045 | 2.869E-25 |
| chr11 TCONS_00021484 | XLOC_019299 | 19995771 | 19995994 | + | 1 | OS11G0544200 | CUFF.3102 OS11T0544200(i | TSS2046 | 1.159E-09 |
| chr11 TCONS_00021492 | XLOC_019308 | 20095289 | 20095595 | + | 1 | NA           | CUFF.3105 NA u           | TSS2047 | 4.187E-73 |
| chr11 TCONS_00025970 | XLOC_019377 | 20661398 | 20661602 | + | 1 | OS11G0556132 | CUFF.4024 OS11T0556132(i | TSS2054 | 1.217E-41 |
| chr11 TCONS_00025974 | XLOC_019467 | 21482645 | 21482855 | + | 1 | OS11G0572500 | CUFF.4056 OS11T0572500(i | TSS2064 | 7.959E-31 |
| chr11 TCONS_00021658 | XLOC_019470 | 21514937 | 21515137 | + | 1 | NA           | CUFF.3147 NA u           | TSS2064 | 0         |
| chr11 TCONS_00021708 | XLOC_019519 | 21887422 | 21887654 | + | 1 | OS11G0579700 | CUFF.3160 OS11T0579700(i | TSS2069 | 0         |
| chr11 TCONS_00021717 | XLOC_019527 | 21991644 | 21991874 | + | 1 | NA           | CUFF.3158 NA u           | TSS2070 | 0.012046  |
| chr11 TCONS_00025978 | XLOC_019539 | 22130381 | 22130592 | + | 1 | NA           | CUFF.4065 NA u           | TSS2071 | 1.136E-14 |
| chr11 TCONS_00025983 | XLOC_019583 | 22469657 | 22469983 | + | 1 | OS11G0591200 | CUFF.4091 OS11T0591200(x | TSS2076 | 1.339E-23 |
| chr11 TCONS_00025984 | XLOC_019594 | 22516562 | 22516764 | + | 1 | OS11G0592300 | CUFF.4094 OS11T0592300(x | TSS2077 | 2.881E-79 |
| chr11 TCONS_00021909 | XLOC_019711 | 23472871 | 23473210 | + | 1 | OS11G0607900 | CUFF.3331 OS11T0607900(i | TSS2089 | 2.289E-48 |
| chr11 TCONS_00025991 | XLOC_019712 | 23473994 | 23474218 | + | 1 | OS11G0607900 | CUFF.4146 OS11T0607900(i | TSS2090 | 2.643E-14 |
| chr11 TCONS_00021910 | XLOC_019713 | 23475099 | 23475303 | + | 1 | OS11G0607900 | CUFF.3342 OS11T0607900(i | TSS2090 | 3.834E-41 |
| chr11 TCONS_00025994 | XLOC_019724 | 23617931 | 23618131 | + | 1 | OS11G0610700 | CUFF.4131 OS11T0610700(i | TSS2091 | 8.061E-36 |
| chr11 TCONS_00025996 | XLOC_019758 | 24086705 | 24087075 | + | 1 | NA           | CUFF.4152 NA u           | TSS2095 | 1.501E-13 |
| chr11 TCONS_00021965 | XLOC_019763 | 24147415 | 24147652 | + | 1 | NCRNA_8299   | CUFF.3238 NCRNA_8299(x   | TSS2095 | 6.603E-24 |
| chr11 TCONS_00025998 | XLOC_019765 | 24165880 | 24166084 | + | 1 | NA           | CUFF.4155 NA u           | TSS2095 | 2.529E-33 |
| chr11 TCONS_00021967 | XLOC_019766 | 24168872 | 24169104 | + | 1 | OS11G0620000 | CUFF.3239 OS11T0620000(i | TSS2096 | 8.316E-26 |
| chr11 TCONS_00021981 | XLOC_019777 | 24211750 | 24212134 | + | 1 | OS11G0621000 | CUFF.3242 OS11T0621000(i | TSS2097 | 0.0001289 |
| chr11 TCONS_00021997 | XLOC_019792 | 24421678 | 24421982 | + | 1 | NA           | CUFF.3248 NA u           | TSS2099 | 6.118E-73 |
| chr11 TCONS_00026000 | XLOC_019792 | 24421526 | 24421869 | + | 1 | NA           | CUFF.4167 NA u           | TSS2098 | 5.05E-05  |
| chr11 TCONS_00026001 | XLOC_019793 | 24423513 | 24423924 | + | 1 | NA           | CUFF.4166 NA u           | TSS2099 | 3.907E-44 |
| chr11 TCONS_00026002 | XLOC_019794 | 24425046 | 24425309 | + | 1 | NA           | CUFF.4165 NA u           | TSS2099 | 0         |
| chr11 TCONS_00022002 | XLOC_019802 | 24432026 | 24432326 | + | 1 | NA           | CUFF.3251 NA u           | TSS2100 | 2.306E-10 |
| chr11 TCONS_00026007 | XLOC_019802 | 24432317 | 24432535 | + | 1 | NA           | CUFF.4170 NA u           | TSS2100 | 5.076E-11 |
| chr11 TCONS_00022003 | XLOC_019803 | 24433396 | 24433600 | + | 1 | NA           | CUFF.3250 NA u           | TSS2100 | 7.836E-22 |
| chr11 TCONS_00026008 | XLOC_019803 | 24432901 | 24433408 | + | 1 | NA           | CUFF.4175 NA u           | TSS2100 | 7.056E-24 |
| chr11 TCONS_00026010 | XLOC_019805 | 24435365 | 24435783 | + | 1 | NA           | CUFF.4187 NA u           | TSS2100 | 5.99E-06  |
| chr11 TCONS_00026011 | XLOC_019806 | 24436203 | 24436599 | + | 1 | NA           | CUFF.4173 NA u           | TSS2100 | 1.093E-13 |
| chr11 TCONS_00026012 | XLOC_019807 | 24436665 | 24437213 | + | 1 | NA           | CUFF.4176 NA u           | TSS2100 | 1.929E-52 |
| chr11 TCONS_00026013 | XLOC_019808 | 24437395 | 24438287 | + | 1 | NA           | CUFF.4181 NA u           | TSS2101 | 0.011481  |

|                      |             |          |          |   |   |              |                        |         |           |
|----------------------|-------------|----------|----------|---|---|--------------|------------------------|---------|-----------|
| chr11 TCONS_00026015 | XLOC_019874 | 24950486 | 24950817 | + | 1 | OS11G0634200 | CUFF.4206 OS11T06342(x | TSS2108 | 3.51E-47  |
| chr11 TCONS_00026016 | XLOC_019893 | 25148468 | 25148717 | + | 1 | NA           | CUFF.4208 NA u         | TSS2110 | 6.821E-10 |
| chr11 TCONS_00022103 | XLOC_019900 | 25176628 | 25176974 | + | 1 | NA           | CUFF.3275 NA u         | TSS2110 | 1.825E-05 |
| chr11 TCONS_00022104 | XLOC_019901 | 25177963 | 25178284 | + | 1 | OS11G0637501 | CUFF.3280 OS11T06375(x | TSS2110 | 0         |
| chr11 TCONS_00022105 | XLOC_019902 | 25178795 | 25179314 | + | 1 | OS11G0637501 | CUFF.4211 OS11T06375(i | TSS2110 | 3.665E-06 |
| chr11 TCONS_00026018 | XLOC_019904 | 25179700 | 25180178 | + | 1 | OS11G0637501 | CUFF.4214 OS11T06375(i | TSS2111 | 2.099E-13 |
| chr11 TCONS_00026019 | XLOC_019908 | 25203422 | 25203922 | + | 1 | OS11G0637800 | CUFF.4221 OS11T06378(i | TSS2111 | 5.587E-12 |
| chr11 TCONS_00022129 | XLOC_019923 | 25314216 | 25314433 | + | 1 | NA           | CUFF.3284 NA u         | TSS2113 | 2.584E-80 |
| chr11 TCONS_00022133 | XLOC_019925 | 25333213 | 25333436 | + | 1 | OS11G0640500 | CUFF.3287 OS11T06405(x | TSS2113 | 8.985E-35 |
| chr11 TCONS_00026021 | XLOC_019971 | 25779377 | 25779673 | + | 1 | NA           | CUFF.4228 NA u         | TSS2118 | 1.947E-29 |
| chr11 TCONS_00022191 | XLOC_019983 | 25890457 | 25890665 | + | 1 | OS11G0649500 | CUFF.3297 OS11T06495(x | TSS2119 | 0         |
| chr11 TCONS_00026023 | XLOC_020044 | 26555119 | 26555483 | + | 1 | NA           | CUFF.4246 NA u         | TSS2125 | 1.387E-18 |
| chr11 TCONS_00026025 | XLOC_020048 | 26560163 | 26561085 | + | 1 | NA           | CUFF.4255 NA u         | TSS2126 | 1.415E-47 |
| chr11 TCONS_00022259 | XLOC_020050 | 26562171 | 26562382 | + | 1 | NA           | CUFF.3311 NA u         | TSS2126 | 6.49E-50  |
| chr11 TCONS_00026027 | XLOC_020071 | 26830963 | 26831188 | + | 1 | NA           | CUFF.4256 NA u         | TSS2128 | 2.688E-55 |
| chr11 TCONS_00026028 | XLOC_020072 | 26831424 | 26831914 | + | 1 | NA           | CUFF.4254 NA u         | TSS2128 | 1.671E-50 |
| chr11 TCONS_00022381 | XLOC_020172 | 27792021 | 27792321 | + | 1 | OS11G0686400 | CUFF.3362 OS11T06864(x | TSS2139 | 1.229E-15 |
| chr11 TCONS_00026035 | XLOC_020178 | 27818364 | 27818577 | + | 1 | OS11G0686900 | CUFF.4308 OS11T06869(x | TSS2139 | 2.229E-54 |
| chr11 TCONS_00026042 | XLOC_020307 | 28993459 | 28994131 | + | 1 | OS11G0708600 | CUFF.4346 OS11T07086(i | TSS2153 | 8.061E-36 |
| chr11 TCONS_00026045 | XLOC_020331 | 197125   | 197356   | - | 1 | NA           | CUFF.3275 NA u         | TSS2155 | 2.02E-19  |
| chr11 TCONS_00022550 | XLOC_020332 | 197445   | 197736   | - | 1 | NA           | CUFF.2583 NA u         | TSS2155 | 0         |
| chr11 TCONS_00026046 | XLOC_020366 | 456764   | 456976   | - | 1 | OS11G0109800 | CUFF.3292 OS11T01098(x | TSS2159 | 3.718E-24 |
| chr11 TCONS_00022612 | XLOC_020390 | 616038   | 616278   | - | 1 | NA           | CUFF.2601 NA u         | TSS2161 | 1.738E-21 |
| chr11 TCONS_00022644 | XLOC_020420 | 812705   | 812938   | - | 1 | OS11G0117900 | CUFF.2608 OS11T01179(x | TSS2165 | 2.98E-24  |
| chr11 TCONS_00022723 | XLOC_020499 | 1456486  | 1456900  | - | 1 | OS11G0131900 | CUFF.2630 OS11T01319(x | TSS2173 | 0         |
| chr11 TCONS_00022724 | XLOC_020500 | 1460623  | 1460835  | - | 1 | NA           | CUFF.2622 NA u         | TSS2173 | 1.417E-83 |
| chr11 TCONS_00022732 | XLOC_020509 | 1513677  | 1513896  | - | 1 | NA           | CUFF.2623 NA u         | TSS2174 | 8.252E-13 |
| chr11 TCONS_00026057 | XLOC_020562 | 1896844  | 1897192  | - | 1 | OS11G0141000 | CUFF.3360 OS11T01410(i | TSS2180 | 2.542E-23 |
| chr11 TCONS_00022847 | XLOC_020614 | 2269006  | 2269219  | - | 1 | NA           | CUFF.2662 NA u         | TSS2185 | 2.569E-63 |
| chr11 TCONS_00026060 | XLOC_020627 | 2372490  | 2372696  | - | 1 | NA           | CUFF.3393 NA u         | TSS2186 | 5.592E-20 |
| chr11 TCONS_00026061 | XLOC_020652 | 2524881  | 2525628  | - | 1 | OS11G0153800 | CUFF.3407 OS11T01538(i | TSS2189 | 2.216E-26 |
| chr11 TCONS_00022906 | XLOC_020675 | 2684930  | 2685244  | - | 1 | OS11G0156600 | CUFF.3409 OS11T01566(x | TSS2191 | 0.32239   |
| chr11 TCONS_00026064 | XLOC_020686 | 2733705  | 2733911  | - | 1 | OS11G0157100 | CUFF.3418 OS11T01571(i | TSS2192 | 2.638E-18 |
| chr11 TCONS_00026065 | XLOC_020694 | 2789573  | 2790356  | - | 1 | OS11G0157600 | CUFF.3417 OS11T01576(i | TSS2193 | 1.351E-42 |
| chr11 TCONS_00022931 | XLOC_020703 | 2834651  | 2835253  | - | 1 | NA           | CUFF.2678 NA u         | TSS2194 | 0.052335  |

|                      |             |         |         |   |   |              |           |              |         |           |           |
|----------------------|-------------|---------|---------|---|---|--------------|-----------|--------------|---------|-----------|-----------|
| chr11 TCONS_00026069 | XLOC_020721 | 2974231 | 2974432 | - | 1 | OS11G0161000 | CUFF.3425 | OS11T01610(x | TSS2196 | 2.943E-20 |           |
| chr11 TCONS_00022960 | XLOC_020733 | 3095253 | 3095491 | - | 1 | OS11G0163500 | CUFF.2694 | OS11T01635(i | TSS2197 | 2.002E-24 |           |
| chr11 TCONS_00022987 | XLOC_020758 | 3291115 | 3291356 | - | 1 | OS11G0168100 | CUFF.2700 | OS11T01681(i | TSS2200 | 6.072E-25 |           |
| chr11 TCONS_00026072 | XLOC_020762 | 3300513 | 3301093 | - | 1 | OS11G0168300 | CUFF.3435 | OS11T01683(i | TSS2200 | 2.802E-35 |           |
| chr11 TCONS_00026077 | XLOC_020794 | 3540847 | 3541122 | - | 1 | NA           | CUFF.3443 | NA           | u       | TSS2204   | 1.265E-07 |
| chr11 TCONS_00023020 | XLOC_020796 | 3542168 | 3542942 | - | 1 | NA           | CUFF.2706 | NA           | u       | TSS2204   | 4.933E-33 |
| chr11 TCONS_00026082 | XLOC_020797 | 3544310 | 3544842 | - | 1 | NA           | CUFF.3446 | NA           | u       | TSS2204   | 2.27E-41  |
| chr11 TCONS_00026083 | XLOC_020799 | 3551431 | 3551897 | - | 1 | OS11G0172300 | CUFF.3452 | OS11T01723(x | TSS2205 | 4.766E-28 |           |
| chr11 TCONS_00026084 | XLOC_020806 | 3610694 | 3610907 | - | 1 | NA           | CUFF.3447 | NA           | u       | TSS2205   | 1.335E-33 |
| chr11 TCONS_00026087 | XLOC_020870 | 4226827 | 4227267 | - | 1 | OS11G0183700 | CUFF.3489 | OS11T01837(x | TSS2212 | 1.339E-23 |           |
| chr11 TCONS_00023101 | XLOC_020873 | 4235594 | 4235965 | - | 1 | NA           | CUFF.2731 | NA           | u       | TSS2212   | 1.137E-69 |
| chr11 TCONS_00023102 | XLOC_020874 | 4236485 | 4237059 | - | 1 | NA           | CUFF.2730 | NA           | u       | TSS2213   | 1.738E-06 |
| chr11 TCONS_00026090 | XLOC_020874 | 4236741 | 4237190 | - | 1 | NA           | CUFF.3486 | NA           | u       | TSS2213   | 0.0032486 |
| chr11 TCONS_00026091 | XLOC_020876 | 4237940 | 4238560 | - | 1 | NA           | CUFF.3488 | NA           | u       | TSS2213   | 8.03E-12  |
| chr11 TCONS_00023105 | XLOC_020877 | 4248260 | 4248487 | - | 1 | OS11G0183900 | CUFF.2742 | OS11T01839(i | TSS2213 | 0.075834  |           |
| chr11 TCONS_00023160 | XLOC_020931 | 4764361 | 4764577 | - | 1 | OS11G0195100 | CUFF.2745 | OS11T01951(x | TSS2219 | 3.233E-38 |           |
| chr11 TCONS_00023163 | XLOC_020934 | 4785897 | 4787237 | - | 1 | OS11G0195500 | CUFF.2750 | OS11T01955(i | TSS2219 | 6.56E-74  |           |
| chr11 TCONS_00026098 | XLOC_020983 | 5183477 | 5183856 | - | 1 | OS11G0202600 | CUFF.3516 | OS11T02026(i | TSS2224 | 2.863E-13 |           |
| chr11 TCONS_00026101 | XLOC_021010 | 5404121 | 5404373 | - | 1 | OS11G0207000 | CUFF.3538 | OS11T02070(i | TSS2227 | 6.523E-60 |           |
| chr11 TCONS_00023254 | XLOC_021016 | 5442664 | 5442876 | - | 1 | NA           | CUFF.2767 | NA           | u       | TSS2228   | 5.608E-86 |
| chr11 TCONS_00026103 | XLOC_021017 | 5443373 | 5444112 | - | 1 | NA           | CUFF.3520 | NA           | u       | TSS2228   | 0.22617   |
| chr11 TCONS_00026105 | XLOC_021021 | 5451201 | 5451623 | - | 1 | NA           | CUFF.3532 | NA           | u       | TSS2228   | 1.307E-09 |
| chr11 TCONS_00023264 | XLOC_021027 | 5482605 | 5482926 | - | 1 | OS11G0207600 | CUFF.2776 | OS11T02076(x | TSS2229 | 1.086E-64 |           |
| chr11 TCONS_00026108 | XLOC_021072 | 5759971 | 5760174 | - | 1 | NA           | CUFF.3548 | NA           | u       | TSS2234   | 2.638E-18 |
| chr11 TCONS_00026112 | XLOC_021166 | 6446958 | 6447247 | - | 1 | NA           | CUFF.3573 | NA           | u       | TSS2244   | 7.655E-49 |
| chr11 TCONS_00023439 | XLOC_021195 | 6623483 | 6623712 | - | 1 | NA           | CUFF.2812 | NA           | u       | TSS2247   | 1.561E-32 |
| chr11 TCONS_00023441 | XLOC_021197 | 6624581 | 6624862 | - | 1 | OS11G0226700 | CUFF.2818 | OS11T02267(x | TSS2247 | 1.556E-86 |           |
| chr11 TCONS_00026116 | XLOC_021202 | 6652928 | 6653341 | - | 1 | NA           | CUFF.3584 | NA           | u       | TSS2247   | 5.961E-15 |
| chr11 TCONS_00023447 | XLOC_021205 | 6675071 | 6675297 | - | 1 | OS11G0227200 | CUFF.2869 | OS11T02272(i | TSS2248 | 8.85E-05  |           |
| chr11 TCONS_00026120 | XLOC_021246 | 7217765 | 7218426 | - | 1 | NA           | CUFF.3602 | NA           | u       | TSS2252   | 1.501E-13 |
| chr11 TCONS_00026121 | XLOC_021247 | 7218725 | 7218977 | - | 1 | NA           | CUFF.3595 | NA           | u       | TSS2252   | 6.994E-29 |
| chr11 TCONS_00023494 | XLOC_021250 | 7222876 | 7223490 | - | 1 | OS11G0235700 | CUFF.3599 | OS11T02357(x | TSS2252 | 4.757E-15 |           |
| chr11 TCONS_00026124 | XLOC_021286 | 7518707 | 7518999 | - | 1 | OS11G0240900 | CUFF.3614 | OS11T02409(i | TSS2256 | 0.024257  |           |
| chr11 TCONS_00026125 | XLOC_021298 | 7596842 | 7597060 | - | 1 | OS11G0242100 | CUFF.3628 | OS11T02421(i | TSS2257 | 3.796E-39 |           |
| chr11 TCONS_00026126 | XLOC_021300 | 7618395 | 7618617 | - | 1 | NA           | CUFF.3613 | NA           | u       | TSS2257   | 1.265E-07 |

|                      |             |          |          |   |   |              |                         |   |         |           |
|----------------------|-------------|----------|----------|---|---|--------------|-------------------------|---|---------|-----------|
| chr11 TCONS_00026128 | XLOC_021342 | 7857019  | 7857357  | - | 1 | NA           | CUFF.3625 NA            | u | TSS2262 | 4.791E-33 |
| chr11 TCONS_00026129 | XLOC_021343 | 7857445  | 7857855  | - | 1 | NA           | CUFF.3627 NA            | u | TSS2262 | 3.839E-19 |
| chr11 TCONS_00023614 | XLOC_021376 | 8079100  | 8079325  | - | 1 | NA           | CUFF.2841 NA            | u | TSS2265 | 2.734E-35 |
| chr11 TCONS_00023667 | XLOC_021423 | 8477928  | 8478132  | - | 1 | NA           | CUFF.2854 NA            | u | TSS2270 | 0         |
| chr11 TCONS_00026138 | XLOC_021426 | 8479700  | 8480103  | - | 1 | NA           | CUFF.3657 NA            | u | TSS2271 | 0.005791  |
| chr11 TCONS_00023708 | XLOC_021463 | 8827821  | 8828060  | - | 1 | NA           | CUFF.2863 NA            | u | TSS2274 | 6.012E-30 |
| chr11 TCONS_00026144 | XLOC_021493 | 9100532  | 9100739  | - | 1 | NA           | CUFF.3675 NA            | u | TSS2278 | 5.016E-18 |
| chr11 TCONS_00026145 | XLOC_021495 | 9106027  | 9106232  | - | 1 | OS11G0265850 | CUFF.3680 OS11T026585(x | u | TSS2278 | 2.638E-18 |
| chr11 TCONS_00023747 | XLOC_021500 | 9152190  | 9152402  | - | 1 | NA           | CUFF.2875 NA            | u | TSS2278 | 1.696E-26 |
| chr11 TCONS_00023793 | XLOC_021547 | 9629327  | 9629886  | - | 1 | NA           | CUFF.2894 NA            | u | TSS2283 | 1.009E-17 |
| chr11 TCONS_00026152 | XLOC_021548 | 9630596  | 9630953  | - | 1 | NA           | CUFF.3703 NA            | u | TSS2283 | 0.88955   |
| chr11 TCONS_00023796 | XLOC_021550 | 9631374  | 9631624  | - | 1 | NA           | CUFF.2893 NA            | u | TSS2284 | 2.325E-27 |
| chr11 TCONS_00023818 | XLOC_021573 | 9962131  | 9962334  | - | 1 | NA           | CUFF.2898 NA            | u | TSS2286 | 0         |
| chr11 TCONS_00023826 | XLOC_021581 | 10070118 | 10070319 | - | 1 | NA           | CUFF.2901 NA            | u | TSS2287 | 0         |
| chr11 TCONS_00026158 | XLOC_021669 | 11201366 | 11201570 | - | 1 | NA           | CUFF.3748 NA            | u | TSS2296 | 1.19E-21  |
| chr11 TCONS_00026160 | XLOC_021671 | 11204194 | 11204481 | - | 1 | NA           | CUFF.3746 NA            | u | TSS2296 | 1.512E-25 |
| chr11 TCONS_00026165 | XLOC_021691 | 11398258 | 11398460 | - | 1 | OS11G0303200 | CUFF.3769 OS11T03032(x  | u | TSS2298 | 2.869E-25 |
| chr11 TCONS_00026171 | XLOC_021782 | 13120487 | 13120700 | - | 1 | NA           | CUFF.3795 NA            | u | TSS2308 | 3.249E-27 |
| chr11 TCONS_00024043 | XLOC_021801 | 13336613 | 13336818 | - | 1 | OS11G0423800 | CUFF.2952 OS11T04238(i  | u | TSS2310 | 0         |
| chr11 TCONS_00026173 | XLOC_021849 | 13996986 | 13997193 | - | 1 | SPPL2        | CUFF.3836 OS11T04332(i  | u | TSS2315 | 1.014E-65 |
| chr11 TCONS_00026174 | XLOC_021850 | 13997360 | 13997571 | - | 1 | SPPL2        | CUFF.3841 OS11T04332(i  | u | TSS2315 | 6.569E-08 |
| chr11 TCONS_00024108 | XLOC_021868 | 14129188 | 14129410 | - | 1 | NA           | CUFF.2969 NA            | u | TSS2317 | 2.735E-51 |
| chr11 TCONS_00024167 | XLOC_021928 | 14785571 | 14785765 | - | 1 | NA           | CUFF.2975 NA            | u | TSS2323 | 1.159E-09 |
| chr11 TCONS_00026187 | XLOC_021981 | 15437600 | 15437890 | - | 1 | OS11G0455800 | CUFF.3897 OS11T04558(i  | u | TSS2328 | 1.535E-09 |
| chr11 TCONS_00026189 | XLOC_022006 | 15610309 | 15610569 | - | 1 | OS11G0459600 | CUFF.3858 OS11T04596(i  | u | TSS2331 | 7.656E-49 |
| chr11 TCONS_00024296 | XLOC_022064 | 16277254 | 16277599 | - | 1 | OS11G0472500 | CUFF.3007 OS11T04725(x  | u | TSS2336 | 0         |
| chr11 TCONS_00026195 | XLOC_022067 | 16305909 | 16306282 | - | 1 | OS11G0473000 | CUFF.3873 OS11T04730(i  | u | TSS2337 | 9.712E-11 |
| chr11 TCONS_00026197 | XLOC_022107 | 16767690 | 16768671 | - | 1 | OS11G0479232 | CUFF.3888 OS11T04792(x  | u | TSS2341 | 0.13091   |
| chr11 TCONS_00024341 | XLOC_022112 | 16818867 | 16819117 | - | 1 | OS11G0480000 | CUFF.3023 OS11T04800(i  | u | TSS2341 | 2.265E-07 |
| chr11 TCONS_00026200 | XLOC_022121 | 16933782 | 16933984 | - | 1 | OS11G0482100 | CUFF.3907 OS11T04821(i  | u | TSS2342 | 1.339E-23 |
| chr11 TCONS_00024349 | XLOC_022122 | 16934636 | 16935169 | - | 1 | OS11G0482100 | CUFF.3033 OS11T04821(x  | u | TSS2342 | 1.841E-51 |
| chr11 TCONS_00026201 | XLOC_022132 | 17011541 | 17011879 | - | 1 | OS11G0483600 | CUFF.3901 OS11T04836(i  | u | TSS2343 | 2.74E-48  |
| chr11 TCONS_00024396 | XLOC_022172 | 17352936 | 17353445 | - | 1 | OS11G0490900 | CUFF.3062 OS11T04909(i  | u | TSS2347 | 7.776E-87 |
| chr11 TCONS_00024464 | XLOC_022237 | 18066087 | 18066882 | - | 1 | NA           | CUFF.3063 NA            | u | TSS2354 | 5.655E-14 |
| chr11 TCONS_00024465 | XLOC_022238 | 18067067 | 18067618 | - | 1 | NA           | CUFF.3064 NA            | u | TSS2354 | 0.04715   |

|                      |             |          |          |   |   |              |                        |   |         |           |
|----------------------|-------------|----------|----------|---|---|--------------|------------------------|---|---------|-----------|
| chr11 TCONS_00024466 | XLOC_022239 | 18067731 | 18068185 | - | 1 | NA           | CUFF.3065 NA           | u | TSS2355 | 1.155E-20 |
| chr11 TCONS_00024565 | XLOC_022333 | 19166936 | 19167261 | - | 1 | NA           | CUFF.3078 NA           | u | TSS2364 | 2.753E-12 |
| chr11 TCONS_00024566 | XLOC_022334 | 19168648 | 19168856 | - | 1 | NA           | CUFF.3080 NA           | u | TSS2365 | 5.125E-07 |
| chr11 TCONS_00026219 | XLOC_022398 | 19677736 | 19678005 | - | 1 | OS11G0539200 | CUFF.3983 OS11T05392(x |   | TSS2371 | 3.748E-52 |
| chr11 TCONS_00024659 | XLOC_022424 | 19912244 | 19912459 | - | 1 | NA           | CUFF.3098 NA           | u | TSS2374 | 1.04E-59  |
| chr11 TCONS_00024686 | XLOC_022448 | 20066289 | 20066584 | - | 1 | OS11G0545300 | CUFF.3128 OS11T05453(i |   | TSS2376 | 0         |
| chr11 TCONS_00024687 | XLOC_022449 | 20068505 | 20069154 | - | 1 | OS11G0545300 | CUFF.3131 OS11T05453(i |   | TSS2376 | 0.71174   |
| chr11 TCONS_00024714 | XLOC_022472 | 20241432 | 20241701 | - | 1 | NA           | CUFF.3109 NA           | u | TSS2379 | 2.768E-79 |
| chr11 TCONS_00026224 | XLOC_022473 | 20246515 | 20246887 | - | 1 | NA           | CUFF.4007 NA           | u | TSS2379 | 1.512E-25 |
| chr11 TCONS_00024738 | XLOC_022496 | 20430582 | 20430807 | - | 1 | OS11G0549700 | CUFF.3122 OS11T05497(i |   | TSS2382 | 2.74E-16  |
| chr11 TCONS_00024779 | XLOC_022536 | 20725892 | 20726245 | - | 1 | NA           | CUFF.3130 NA           | u | TSS2386 | 3.734E-31 |
| chr11 TCONS_00024804 | XLOC_022561 | 20953474 | 20953791 | - | 1 | OS11G0562100 | CUFF.3143 OS11T05621(i |   | TSS2388 | 3.275E-54 |
| chr11 TCONS_00026230 | XLOC_022633 | 21687732 | 21687947 | - | 1 | NA           | CUFF.4051 NA           | u | TSS2396 | 1.326E-28 |
| chr11 TCONS_00026232 | XLOC_022649 | 21809281 | 21809496 | - | 1 | OS11G0578100 | CUFF.4071 OS11T05781(x |   | TSS2397 | 4.498E-46 |
| chr11 TCONS_00026235 | XLOC_022657 | 21879821 | 21880021 | - | 1 | NA           | CUFF.4059 NA           | u | TSS2398 | 1.748E-37 |
| chr11 TCONS_00024901 | XLOC_022658 | 21880986 | 21881229 | - | 1 | NA           | CUFF.3155 NA           | u | TSS2398 | 9.093E-16 |
| chr11 TCONS_00024904 | XLOC_022661 | 21908581 | 21908794 | - | 1 | NA           | CUFF.3156 NA           | u | TSS2398 | 4.392E-61 |
| chr11 TCONS_00024927 | XLOC_022684 | 22141112 | 22141332 | - | 1 | OS11G0585700 | CUFF.3164 OS11T05857(x |   | TSS2401 | 3.068E-44 |
| chr11 TCONS_00024941 | XLOC_022698 | 22316085 | 22316287 | - | 1 | OS11G0588400 | CUFF.3182 OS11T05884(i |   | TSS2402 | 2.056E-11 |
| chr11 TCONS_00024945 | XLOC_022702 | 22340162 | 22340460 | - | 1 | NA           | CUFF.3185 NA           | u | TSS2403 | 1.73E-63  |
| chr11 TCONS_00026237 | XLOC_022702 | 22340299 | 22340522 | - | 1 | NA           | CUFF.4090 NA           | u | TSS2403 | 9.036E-28 |
| chr11 TCONS_00024946 | XLOC_022703 | 22340671 | 22340964 | - | 1 | NA           | CUFF.3186 NA           | u | TSS2403 | 4.606E-19 |
| chr11 TCONS_00024947 | XLOC_022704 | 22343925 | 22344178 | - | 1 | NA           | CUFF.3187 NA           | u | TSS2403 | 1.342E-14 |
| chr11 TCONS_00024948 | XLOC_022706 | 22351706 | 22352097 | - | 1 | NA           | CUFF.3189 NA           | u | TSS2403 | 0         |
| chr11 TCONS_00024949 | XLOC_022707 | 22354376 | 22354754 | - | 1 | NA           | CUFF.3191 NA           | u | TSS2403 | 8.859E-11 |
| chr11 TCONS_00024950 | XLOC_022708 | 22355147 | 22355772 | - | 1 | NA           | CUFF.3192 NA           | u | TSS2403 | 3.754E-82 |
| chr11 TCONS_00026243 | XLOC_022722 | 22453282 | 22453518 | - | 1 | NA           | CUFF.4083 NA           | u | TSS2405 | 0.0003675 |
| chr11 TCONS_00024963 | XLOC_022724 | 22454366 | 22454675 | - | 1 | OS11G0591000 | CUFF.3179 OS11T05910(x |   | TSS2405 | 1.084E-42 |
| chr11 TCONS_00024972 | XLOC_022734 | 22510036 | 22510250 | - | 1 | NA           | CUFF.3188 NA           | u | TSS2406 | 4.369E-50 |
| chr11 TCONS_00025006 | XLOC_022770 | 22703963 | 22704410 | - | 1 | NA           | CUFF.3198 NA           | u | TSS2410 | 1.991E-61 |
| chr11 TCONS_00025046 | XLOC_022808 | 23070603 | 23071190 | - | 1 | OS11G0600700 | CUFF.3211 OS11T06007(x |   | TSS2414 | 8.457E-80 |
| chr11 TCONS_00025058 | XLOC_022824 | 23182671 | 23182892 | - | 1 | OS11G0602500 | CUFF.3212 OS11T06025(x |   | TSS2415 | 0         |
| chr11 TCONS_00025096 | XLOC_022863 | 23496012 | 23496353 | - | 1 | OS11G0608300 | CUFF.3231 OS11T06083(x |   | TSS2419 | 0         |
| chr11 TCONS_00026258 | XLOC_022882 | 23664693 | 23664895 | - | 1 | NA           | CUFF.4126 NA           | u | TSS2421 | 1.387E-18 |
| chr11 TCONS_00026261 | XLOC_022901 | 23903016 | 23903472 | - | 1 | NA           | CUFF.4136 NA           | u | TSS2423 | 2.451E-19 |

|                      |             |          |            |   |              |                        |   |         |           |
|----------------------|-------------|----------|------------|---|--------------|------------------------|---|---------|-----------|
| chr11 TCONS_00025145 | XLOC_022914 | 23951219 | 23951446 - | 1 | NA           | CUFF.3234 NA           | u | TSS2425 | 1.238E-25 |
| chr11 TCONS_00026273 | XLOC_022972 | 24449823 | 24450037 - | 1 | NA           | CUFF.4179 NA           | u | TSS2431 | 1.512E-25 |
| chr11 TCONS_00026279 | XLOC_023007 | 24669344 | 24669545 - | 1 | NA           | CUFF.4197 NA           | u | TSS2434 | 1.527E-35 |
| chr11 TCONS_00025233 | XLOC_023009 | 24670038 | 24670243 - | 1 | NA           | CUFF.3267 NA           | u | TSS2435 | 0         |
| chr11 TCONS_00025444 | XLOC_023211 | 26546386 | 26546612 - | 1 | OS11G0661200 | CUFF.3317 OS11T06612(x |   | TSS2456 | 3.451E-32 |
| chr11 TCONS_00025506 | XLOC_023276 | 27151066 | 27151284 - | 1 | NA           | CUFF.3341 NA           | u | TSS2462 | 0.075834  |
| chr11 TCONS_00026305 | XLOC_023292 | 27225306 | 27225547 - | 1 | NA           | CUFF.4287 NA           | u | TSS2464 | 3.249E-27 |
| chr11 TCONS_00026314 | XLOC_023374 | 28003518 | 28003731 - | 1 | NA           | CUFF.4306 NA           | u | TSS2473 | 2.165E-14 |
| chr11 TCONS_00026315 | XLOC_023375 | 28004207 | 28004526 - | 1 | NA           | CUFF.4309 NA           | u | TSS2473 | 1.25E-16  |
| chr11 TCONS_00026318 | XLOC_023391 | 28154414 | 28154737 - | 1 | NA           | CUFF.4315 NA           | u | TSS2474 | 6.145E-41 |
| chr11 TCONS_00025622 | XLOC_023400 | 28231412 | 28231652 - | 1 | NA           | CUFF.3364 NA           | u | TSS2475 | 1.561E-32 |
| chr11 TCONS_00026331 | XLOC_023511 | 8965861  | 8966066 .  | 1 | OS11G0264200 | CUFF.3692 OS11T02642(i |   | TSS2487 | 5.443E-25 |
| chr12 TCONS_00032623 | XLOC_023561 | 301984   | 302321 +   | 1 | OS12G0105700 | CUFF.4353 OS12T01057(x |   | TSS2493 | 0.17233   |
| chr12 TCONS_00032625 | XLOC_023625 | 681215   | 681428 +   | 1 | CIPK14       | CUFF.4382 OS12T01135(i |   | TSS2499 | 1.512E-25 |
| chr12 TCONS_00032626 | XLOC_023626 | 681686   | 681912 +   | 1 | CIPK14       | CUFF.4387 OS12T01135(i |   | TSS2499 | 5.476E-35 |
| chr12 TCONS_00026456 | XLOC_023633 | 713319   | 713882 +   | 1 | NA           | CUFF.3403 NA           | u | TSS2500 | 7.507E-15 |
| chr12 TCONS_00032628 | XLOC_023634 | 715074   | 715346 +   | 1 | NA           | CUFF.4371 NA           | u | TSS2500 | 2.139E-49 |
| chr12 TCONS_00032630 | XLOC_023652 | 789448   | 789879 +   | 1 | NA           | CUFF.4376 NA           | u | TSS2502 | 9.239E-09 |
| chr12 TCONS_00026497 | XLOC_023676 | 920078   | 920443 +   | 1 | OS12G0118800 | CUFF.3434 OS12T01188(x |   | TSS2504 | 1.356E-15 |
| chr12 TCONS_00026498 | XLOC_023677 | 923584   | 923856 +   | 1 | OS12G0118800 | CUFF.3438 OS12T01188(i |   | TSS2505 | 5.02E-61  |
| chr12 TCONS_00032633 | XLOC_023678 | 925040   | 925616 +   | 1 | OS12G0118800 | CUFF.4424 OS12T01188(i |   | TSS2505 | 1.501E-13 |
| chr12 TCONS_00032634 | XLOC_023679 | 925918   | 926183 +   | 1 | OS12G0118800 | CUFF.4428 OS12T01188(i |   | TSS2505 | 3.796E-39 |
| chr12 TCONS_00026577 | XLOC_023754 | 1504579  | 1504813 +  | 1 | NA           | CUFF.3432 NA           | u | TSS2513 | 3.406E-59 |
| chr12 TCONS_00032641 | XLOC_023768 | 1603500  | 1603703 +  | 1 | OS12G0133050 | CUFF.4430 OS12T01330(i |   | TSS2514 | 2.956E-40 |
| chr12 TCONS_00032642 | XLOC_023770 | 1611580  | 1612098 +  | 1 | OS12G0133100 | CUFF.4439 OS12T01331(x |   | TSS2514 | 4.127E-14 |
| chr12 TCONS_00032646 | XLOC_023800 | 1768665  | 1770934 +  | 1 | NA           | CUFF.4435 NA           | u | TSS2517 | 7.283E-22 |
| chr12 TCONS_00032647 | XLOC_023801 | 1771178  | 1772721 +  | 1 | OS12G0136500 | CUFF.4450 OS12T01365(x |   | TSS2518 | 1.1E-48   |
| chr12 TCONS_00032648 | XLOC_023805 | 1794256  | 1794509 +  | 1 | OS12G0137100 | CUFF.4442 OS12T01371(x |   | TSS2518 | 2.38E-16  |
| chr12 TCONS_00032652 | XLOC_023849 | 2126051  | 2126349 +  | 1 | OS12G0143300 | CUFF.4456 OS12T01433(i |   | TSS2523 | 3.311E-37 |
| chr12 TCONS_00026689 | XLOC_023864 | 2218248  | 2218538 +  | 1 | OS12G0145100 | CUFF.3474 OS12T01451(x |   | TSS2525 | 4.72E-09  |
| chr12 TCONS_00032655 | XLOC_023864 | 2218048  | 2218416 +  | 1 | OS12G0145100 | CUFF.4473 OS12T01451(x |   | TSS2524 | 1.524E-79 |
| chr12 TCONS_00026719 | XLOC_023893 | 2369062  | 2369275 +  | 1 | NA           | CUFF.3468 NA           | u | TSS2528 | 3.488E-37 |
| chr12 TCONS_00026758 | XLOC_023929 | 2602999  | 2603216 +  | 1 | OS12G0152800 | CUFF.3493 OS12T01528(i |   | TSS2531 | 2.78E-40  |
| chr12 TCONS_00026770 | XLOC_023940 | 2663261  | 2663471 +  | 1 | OS12G0154000 | CUFF.3484 OS12T01540(i |   | TSS2533 | 1.918E-45 |
| chr12 TCONS_00032658 | XLOC_023987 | 3091523  | 3091750 +  | 1 | NA           | CUFF.4492 NA           | u | TSS2537 | 3.349E-81 |



|                      |             |          |          |   |   |              |                        |         |           |
|----------------------|-------------|----------|----------|---|---|--------------|------------------------|---------|-----------|
| chr12 TCONS_00032659 | XLOC_023991 | 3131019  | 3131308  | + | 1 | WNK9         | CUFF.4504 OS12T01621(i | TSS2538 | 0.13659   |
| chr12 TCONS_00026832 | XLOC_024002 | 3217768  | 3217972  | + | 1 | NA           | CUFF.3499 NA u         | TSS2539 | 2.532E-36 |
| chr12 TCONS_00032660 | XLOC_024006 | 3239721  | 3239941  | + | 1 | OS12G0163800 | CUFF.4519 OS12T01638(i | TSS2539 | 6.268E-22 |
| chr12 TCONS_00032662 | XLOC_024012 | 3301005  | 3301208  | + | 1 | OS12G0164800 | CUFF.4511 OS12T01648(i | TSS2540 | 1.25E-16  |
| chr12 TCONS_00026841 | XLOC_024014 | 3313186  | 3313670  | + | 1 | OS12G0165000 | CUFF.3517 OS12T01650(i | TSS2540 | 2.756E-62 |
| chr12 TCONS_00032665 | XLOC_024042 | 3503165  | 3503494  | + | 1 | OS12G0169000 | CUFF.4517 OS12T01690(x | TSS2543 | 0.0006715 |
| chr12 TCONS_00032666 | XLOC_024047 | 3553150  | 3553726  | + | 1 | OS12G0169800 | CUFF.4522 OS12T01698(x | TSS2543 | 9.482E-43 |
| chr12 TCONS_00026885 | XLOC_024060 | 3629939  | 3630276  | + | 1 | NA           | CUFF.3526 NA u         | TSS2545 | 8.252E-13 |
| chr12 TCONS_00032669 | XLOC_024077 | 3725286  | 3725619  | + | 1 | OS12G0173400 | CUFF.4536 OS12T01734(i | TSS2546 | 5.463E-13 |
| chr12 TCONS_00032678 | XLOC_024177 | 4635953  | 4636341  | + | 1 | OS12G0191150 | CUFF.4574 OS12T01911(i | TSS2557 | 1.307E-09 |
| chr12 TCONS_00027025 | XLOC_024195 | 4769319  | 4769876  | + | 1 | OS12G0193200 | CUFF.3567 OS12T01932(i | TSS2559 | 6.512E-29 |
| chr12 TCONS_00032682 | XLOC_024196 | 4771325  | 4771584  | + | 1 | OS12G0193200 | CUFF.4586 OS12T01932(i | TSS2559 | 3.718E-24 |
| chr12 TCONS_00032683 | XLOC_024204 | 4862455  | 4862954  | + | 1 | OS12G0194700 | CUFF.4585 OS12T01947(x | TSS2560 | 1.339E-23 |
| chr12 TCONS_00027044 | XLOC_024215 | 4990436  | 4990645  | + | 1 | NA           | CUFF.3566 NA u         | TSS2561 | 1.463E-38 |
| chr12 TCONS_00032685 | XLOC_024225 | 5078385  | 5078593  | + | 1 | OS12G0198200 | CUFF.4598 OS12T01982(i | TSS2562 | 2.26E-21  |
| chr12 TCONS_00027055 | XLOC_024227 | 5092419  | 5092622  | + | 1 | NA           | CUFF.3572 NA u         | TSS2562 | 0         |
| chr12 TCONS_00032688 | XLOC_024246 | 5378697  | 5379227  | + | 1 | NA           | CUFF.4599 NA u         | TSS2564 | 1.19E-21  |
| chr12 TCONS_00027095 | XLOC_024269 | 5487666  | 5487958  | + | 1 | OS12G0205100 | CUFF.3583 OS12T02051(i | TSS2567 | 0         |
| chr12 TCONS_00032691 | XLOC_024281 | 5613011  | 5613332  | + | 1 | OS12G0207500 | CUFF.4678 OS12T02075(x | TSS2568 | 1.448E-48 |
| chr12 TCONS_00032693 | XLOC_024302 | 5748727  | 5748934  | + | 1 | NA           | CUFF.4618 NA u         | TSS2570 | 2.223E-67 |
| chr12 TCONS_00032699 | XLOC_024382 | 6805669  | 6805901  | + | 1 | OS12G0225150 | CUFF.4648 OS12T02251(i | TSS2578 | 2.02E-19  |
| chr12 TCONS_00027228 | XLOC_024403 | 7027655  | 7027883  | + | 1 | NA           | CUFF.3606 NA u         | TSS2581 | 2.532E-36 |
| chr12 TCONS_00032706 | XLOC_024501 | 8001597  | 8001801  | + | 1 | OS12G0244500 | CUFF.4690 OS12T02445(i | TSS2591 | 2.647E-43 |
| chr12 TCONS_00032707 | XLOC_024558 | 8531495  | 8531729  | + | 1 | NA           | CUFF.4701 NA u         | TSS2597 | 6.604E-06 |
| chr12 TCONS_00032711 | XLOC_024631 | 9313932  | 9314361  | + | 1 | OS12G0263800 | CUFF.4739 OS12T02638(i | TSS2604 | 1.859E-10 |
| chr12 TCONS_00027488 | XLOC_024647 | 9474170  | 9474388  | + | 1 | NA           | CUFF.3658 NA u         | TSS2606 | 4.132E-40 |
| chr12 TCONS_00027522 | XLOC_024681 | 9770788  | 9770999  | + | 1 | OS12G0270100 | CUFF.3673 OS12T02701(i | TSS2610 | 1.81E-68  |
| chr12 TCONS_00027537 | XLOC_024695 | 10011234 | 10011459 | + | 1 | NA           | CUFF.3666 NA u         | TSS2612 | 3.135E-08 |
| chr12 TCONS_00032718 | XLOC_024725 | 10423978 | 10424393 | + | 1 | OS12G0278700 | CUFF.4735 OS12T02787(x | TSS2615 | 1.991E-12 |
| chr12 TCONS_00027568 | XLOC_024728 | 10439443 | 10439649 | + | 1 | OS12G0278800 | CUFF.3686 OS12T02788(i | TSS2615 | 6.775E-44 |
| chr12 TCONS_00032726 | XLOC_024783 | 10971410 | 10971613 | + | 1 | OS12G0287300 | CUFF.4755 OS12T02873(i | TSS2621 | 6.268E-22 |
| chr12 TCONS_00027638 | XLOC_024792 | 11052970 | 11053188 | + | 1 | OS12G0288400 | CUFF.3709 OS12T02884(i | TSS2622 | 3.312E-30 |
| chr12 TCONS_00032732 | XLOC_024812 | 11219894 | 11220138 | + | 1 | OS12G0290600 | CUFF.4767 OS12T02906(i | TSS2624 | 7.048E-34 |
| chr12 TCONS_00027685 | XLOC_024835 | 11374228 | 11374449 | + | 1 | TERT         | CUFF.3707 OS12T02931(i | TSS2627 | 3.451E-32 |
| chr12 TCONS_00027706 | XLOC_024854 | 11736066 | 11736392 | + | 1 | GWD3         | CUFF.3720 OS12T02975(i | TSS2629 | 1.444E-33 |

|                      |             |          |          |   |   |              |                        |           |           |
|----------------------|-------------|----------|----------|---|---|--------------|------------------------|-----------|-----------|
| chr12 TCONS_00027707 | XLOC_024856 | 11742160 | 11742368 | + | 1 | GWD3         | CUFF.3721 OS12T02975(i | TSS2629   | 1.219E-68 |
| chr12 TCONS_00027728 | XLOC_024878 | 12135225 | 12135459 | + | 1 | NA           | CUFF.3713 NA           | u TSS2631 | 0         |
| chr12 TCONS_00027835 | XLOC_024978 | 13349390 | 13349623 | + | 1 | NA           | CUFF.3753 NA           | u TSS2642 | 1.165E-63 |
| chr12 TCONS_00032748 | XLOC_024991 | 13378028 | 13378270 | + | 1 | NA           | CUFF.4869 NA           | u TSS2643 | 6.588E-19 |
| chr12 TCONS_00032749 | XLOC_024993 | 13381924 | 13382199 | + | 1 | NA           | CUFF.4873 NA           | u TSS2643 | 0         |
| chr12 TCONS_00032750 | XLOC_024996 | 13385613 | 13385846 | + | 1 | NA           | CUFF.4895 NA           | u TSS2644 | 1.168E-26 |
| chr12 TCONS_00032752 | XLOC_025003 | 13402144 | 13402606 | + | 1 | NA           | CUFF.4951 NA           | u TSS2644 | 1.417E-56 |
| chr12 TCONS_00027914 | XLOC_025065 | 14012914 | 14013336 | + | 1 | NA           | CUFF.3770 NA           | u TSS2651 | 9.059E-06 |
| chr12 TCONS_00027915 | XLOC_025066 | 14014687 | 14015007 | + | 1 | NA           | CUFF.3771 NA           | u TSS2651 | 3.37E-57  |
| chr12 TCONS_00032763 | XLOC_025130 | 14902232 | 14902553 | + | 1 | OS12G0443700 | CUFF.4868 OS12T04437(i | TSS2657   | 0.021098  |
| chr12 TCONS_00032765 | XLOC_025168 | 15337453 | 15337845 | + | 1 | OS12G0448900 | CUFF.4894 OS12T04489(i | TSS2661   | 1.671E-50 |
| chr12 TCONS_00032766 | XLOC_025169 | 15338086 | 15338317 | + | 1 | OS12G0448900 | CUFF.4896 OS12T04489(i | TSS2661   | 1.671E-50 |
| chr12 TCONS_00028019 | XLOC_025171 | 15339657 | 15339989 | + | 1 | NCRNA_33503  | CUFF.3860 NCRNA_335(x  | TSS2662   | 0         |
| chr12 TCONS_00032768 | XLOC_025171 | 15339889 | 15340118 | + | 1 | OS12G0448900 | CUFF.4902 OS12T04489(i | TSS2662   | 1.512E-25 |
| chr12 TCONS_00032771 | XLOC_025189 | 15749856 | 15750069 | + | 1 | NA           | CUFF.4875 NA           | u TSS2663 | 6.269E-37 |
| chr12 TCONS_00032776 | XLOC_025238 | 16196545 | 16197127 | + | 1 | OS12G0460800 | CUFF.4919 OS12T04608(x | TSS2668   | 6.504E-13 |
| chr12 TCONS_00032777 | XLOC_025239 | 16197426 | 16197465 | + | 1 | OS12G0460800 | CUFF.4920 OS12T04608(x | TSS2669   | 2.859E-30 |
| chr12 TCONS_00028171 | XLOC_025322 | 17419268 | 17419503 | + | 1 | NA           | CUFF.3835 NA           | u TSS2678 | 0         |
| chr12 TCONS_00032781 | XLOC_025323 | 17420270 | 17420470 | + | 1 | NA           | CUFF.4924 NA           | u TSS2678 | 3.249E-27 |
| chr12 TCONS_00028174 | XLOC_025326 | 17462996 | 17463196 | + | 1 | NA           | CUFF.3837 NA           | u TSS2678 | 0         |
| chr12 TCONS_00032786 | XLOC_025430 | 18525540 | 18525751 | + | 1 | KSL10        | CUFF.4971 OS12T04918(i | TSS2688   | 3.718E-24 |
| chr12 TCONS_00032788 | XLOC_025471 | 18855731 | 18855973 | + | 1 | OS12G0496900 | CUFF.4969 OS12T04969(x | TSS2692   | 3.721E-34 |
| chr12 TCONS_00028350 | XLOC_025499 | 19068037 | 19068270 | + | 1 | NA           | CUFF.3886 NA           | u TSS2695 | 4.391E-34 |
| chr12 TCONS_00032792 | XLOC_025500 | 19068754 | 19069055 | + | 1 | NA           | CUFF.4987 NA           | u TSS2695 | 8.02E-23  |
| chr12 TCONS_00028357 | XLOC_025506 | 19125949 | 19126151 | + | 1 | OS12G0502100 | CUFF.3890 OS12T05021(x | TSS2696   | 0         |
| chr12 TCONS_00032795 | XLOC_025552 | 19488092 | 19488319 | + | 1 | NA           | CUFF.5002 NA           | u TSS2701 | 6.604E-06 |
| chr12 TCONS_00032797 | XLOC_025569 | 19637417 | 19638388 | + | 1 | NA           | CUFF.5009 NA           | u TSS2703 | 0.0010488 |
| chr12 TCONS_00028422 | XLOC_025571 | 19639516 | 19639750 | + | 1 | NA           | CUFF.3909 NA           | u TSS2703 | 1.837E-16 |
| chr12 TCONS_00032801 | XLOC_025579 | 19685587 | 19686013 | + | 1 | OS12G0511000 | CUFF.5014 OS12T05110(i | TSS2704   | 1.508E-30 |
| chr12 TCONS_00032803 | XLOC_025598 | 19833569 | 19833774 | + | 1 | OS12G0512700 | CUFF.5031 OS12T05127(i | TSS2706   | 5.592E-20 |
| chr12 TCONS_00032809 | XLOC_025657 | 20472166 | 20472713 | + | 1 | NA           | CUFF.1748 NA           | u TSS2712 | 1.116E-17 |
| chr12 TCONS_00028511 | XLOC_025660 | 20486906 | 20487120 | + | 1 | NA           | CUFF.1361 NA           | u TSS2712 | 1.387E-19 |
| chr12 TCONS_00028512 | XLOC_025661 | 20499000 | 20499204 | + | 1 | NA           | CUFF.1362 NA           | u TSS2712 | 0         |
| chr12 TCONS_00032813 | XLOC_025671 | 20511623 | 20511934 | + | 1 | NA           | CUFF.1750 NA           | u TSS2713 | 2.358E-21 |
| chr12 TCONS_00032815 | XLOC_025673 | 20512882 | 20513139 | + | 1 | NA           | CUFF.1750 NA           | u TSS2714 | 5.476E-35 |

|                      |             |          |          |   |   |              |                         |   |         |           |
|----------------------|-------------|----------|----------|---|---|--------------|-------------------------|---|---------|-----------|
| chr12 TCONS_00032816 | XLOC_025674 | 20513503 | 20513812 | + | 1 | NA           | CUFF.1750 NA            | u | TSS2714 | 3.631E-15 |
| chr12 TCONS_00028522 | XLOC_025675 | 20516114 | 20516333 | + | 1 | NA           | CUFF.1363 NA            | u | TSS2714 | 5.934E-71 |
| chr12 TCONS_00028523 | XLOC_025676 | 20516493 | 20516840 | + | 1 | NA           | CUFF.1363 NA            | u | TSS2714 | 1.877E-60 |
| chr12 TCONS_00032817 | XLOC_025677 | 20517229 | 20518735 | + | 1 | NA           | CUFF.1750 NA            | u | TSS2714 | 0         |
| chr12 TCONS_00028528 | XLOC_025678 | 20520363 | 20521553 | + | 1 | NA           | CUFF.1364 NA            | u | TSS2715 | 3.455E-81 |
| chr12 TCONS_00032818 | XLOC_025678 | 20518910 | 20520450 | + | 1 | NCRNA_53023  | CUFF.1750 NCRNA_53023   | x | TSS2714 | 4.761E-40 |
| chr12 TCONS_00032821 | XLOC_025682 | 20527118 | 20527509 | + | 1 | NA           | CUFF.1751 NA            | u | TSS2715 | 0.0020432 |
| chr12 TCONS_00032822 | XLOC_025683 | 20527635 | 20527967 | + | 1 | NA           | CUFF.1751 NA            | u | TSS2715 | 1.227E-33 |
| chr12 TCONS_00032823 | XLOC_025685 | 20529160 | 20529437 | + | 1 | NCRNA_529    | CUFF.1752 NCRNA_529     | x | TSS2715 | 0         |
| chr12 TCONS_00032824 | XLOC_025687 | 20535714 | 20535993 | + | 1 | NA           | CUFF.1752 NA            | u | TSS2716 | 1.748E-28 |
| chr12 TCONS_00028536 | XLOC_025690 | 20538719 | 20539313 | + | 1 | NA           | CUFF.1365 NA            | u | TSS2716 | 2.644E-30 |
| chr12 TCONS_00028543 | XLOC_025696 | 20557782 | 20558109 | + | 1 | NA           | CUFF.1366 NA            | u | TSS2717 | 6.043E-35 |
| chr12 TCONS_00032829 | XLOC_025696 | 20557945 | 20558287 | + | 1 | NA           | CUFF.1753 NA            | u | TSS2717 | 1.002E-14 |
| chr12 TCONS_00032830 | XLOC_025697 | 20558935 | 20559632 | + | 1 | NCRNA_38117  | CUFF.1753 NCRNA_38117   | x | TSS2717 | 2.529E-33 |
| chr12 TCONS_00028545 | XLOC_025698 | 20559862 | 20560171 | + | 1 | NA           | CUFF.1366 NA            | u | TSS2717 | 5.168E-10 |
| chr12 TCONS_00028550 | XLOC_025704 | 20610584 | 20610815 | + | 1 | NA           | CUFF.1366 NA            | u | TSS2718 | 9.83E-24  |
| chr12 TCONS_00032834 | XLOC_025716 | 20631456 | 20631841 | + | 1 | NA           | CUFF.1754 NA            | u | TSS2719 | 1.531E-74 |
| chr12 TCONS_00028565 | XLOC_025717 | 20632290 | 20632617 | + | 1 | NA           | CUFF.1369 NA            | u | TSS2719 | 1.169E-39 |
| chr12 TCONS_00032836 | XLOC_025718 | 20633342 | 20633686 | + | 1 | NA           | CUFF.1754 NA            | u | TSS2719 | 9.788E-47 |
| chr12 TCONS_00028567 | XLOC_025719 | 20633825 | 20634726 | + | 1 | NA           | CUFF.1369 NA            | u | TSS2719 | 8.095E-43 |
| chr12 TCONS_00028568 | XLOC_025720 | 20635588 | 20635792 | + | 1 | NA           | CUFF.1370 NA            | u | TSS2720 | 0         |
| chr12 TCONS_00032838 | XLOC_025720 | 20635775 | 20636063 | + | 1 | NA           | CUFF.1755 NA            | u | TSS2720 | 1.709E-28 |
| chr12 TCONS_00028572 | XLOC_025725 | 20644076 | 20644308 | + | 1 | NA           | CUFF.1370 NA            | u | TSS2720 | 3.716E-17 |
| chr12 TCONS_00032842 | XLOC_025727 | 20650083 | 20651191 | + | 1 | OS12G0525300 | CUFF.1755 OS12T05253(i) |   | TSS2720 | 0.8541    |
| chr12 TCONS_00028575 | XLOC_025728 | 20651354 | 20651562 | + | 1 | OS12G0525300 | CUFF.1371 OS12T05253(i) |   | TSS2721 | 0         |
| chr12 TCONS_00028576 | XLOC_025730 | 20653864 | 20654105 | + | 1 | NA           | CUFF.1371 NA            | u | TSS2721 | 8.551E-21 |
| chr12 TCONS_00032846 | XLOC_025733 | 20656571 | 20657353 | + | 1 | NA           | CUFF.1756 NA            | u | TSS2721 | 1.696E-16 |
| chr12 TCONS_00032848 | XLOC_025735 | 20658108 | 20662833 | + | 1 | NCRNA_53051  | CUFF.1756 NCRNA_53051   | x | TSS2721 | 6.921E-05 |
| chr12 TCONS_00028586 | XLOC_025737 | 20663861 | 20664210 | + | 1 | NA           | CUFF.1373 NA            | u | TSS2722 | 2.882E-67 |
| chr12 TCONS_00032850 | XLOC_025738 | 20664512 | 20664802 | + | 1 | NA           | CUFF.1757 NA            | u | TSS2722 | 6.268E-37 |
| chr12 TCONS_00032852 | XLOC_025741 | 20668539 | 20668739 | + | 1 | NA           | CUFF.1757 NA            | u | TSS2723 | 3.258E-32 |
| chr12 TCONS_00032853 | XLOC_025742 | 20669620 | 20670075 | + | 1 | NA           | CUFF.1757 NA            | u | TSS2723 | 5.463E-13 |
| chr12 TCONS_00032855 | XLOC_025793 | 21213356 | 21213558 | + | 1 | OS12G0533500 | CUFF.5062 OS12T05335(i) |   | TSS2728 | 1.335E-33 |
| chr12 TCONS_00032857 | XLOC_025799 | 21232845 | 21233188 | + | 1 | NA           | CUFF.5053 NA            | u | TSS2728 | 1.715E-57 |
| chr12 TCONS_00028685 | XLOC_025839 | 21600519 | 21600788 | + | 1 | NA           | CUFF.3942 NA            | u | TSS2733 | 8.915E-85 |

|                      |             |          |          |   |   |              |                        |   |         |           |
|----------------------|-------------|----------|----------|---|---|--------------|------------------------|---|---------|-----------|
| chr12 TCONS_00032863 | XLOC_025852 | 21668690 | 21668926 | + | 1 | NA           | CUFF.5075 NA           | u | TSS2734 | 1.136E-14 |
| chr12 TCONS_00032864 | XLOC_025904 | 22284846 | 22285226 | + | 1 | NA           | CUFF.5093 NA           | u | TSS2740 | 1.326E-28 |
| chr12 TCONS_00032868 | XLOC_025917 | 22421523 | 22422028 | + | 1 | NA           | CUFF.5101 NA           | u | TSS2741 | 0.01177   |
| chr12 TCONS_00028766 | XLOC_025918 | 22429097 | 22429367 | + | 1 | OS12G0552400 | CUFF.3964 OS12T05524(x |   | TSS2741 | 4.743E-10 |
| chr12 TCONS_00028768 | XLOC_025920 | 22430160 | 22430506 | + | 1 | OS12G0552500 | CUFF.5106 OS12T05525(x |   | TSS2741 | 9.318E-25 |
| chr12 TCONS_00032870 | XLOC_025956 | 22711686 | 22712030 | + | 1 | OS12G0557400 | CUFF.5118 OS12T05574(x |   | TSS2746 | 0.0001868 |
| chr12 TCONS_00032872 | XLOC_026036 | 23297752 | 23297955 | + | 1 | OS12G0566700 | CUFF.5164 OS12T05667(i |   | TSS2754 | 2.638E-18 |
| chr12 TCONS_00028898 | XLOC_026039 | 23313589 | 23313837 | + | 1 | OS12G0566900 | CUFF.4010 OS12T05669(i |   | TSS2754 | 1.238E-25 |
| chr12 TCONS_00028944 | XLOC_026069 | 23472032 | 23472233 | + | 1 | OS12G0570075 | CUFF.4025 OS12T05700.i |   | TSS2758 | 0         |
| chr12 TCONS_00028968 | XLOC_026092 | 23591340 | 23591562 | + | 1 | OS12G0572400 | CUFF.4031 OS12T05724(i |   | TSS2760 | 5.699E-41 |
| chr12 TCONS_00028969 | XLOC_026093 | 23592006 | 23592213 | + | 1 | OS12G0572400 | CUFF.4030 OS12T05724(x |   | TSS2761 | 0         |
| chr12 TCONS_00029005 | XLOC_026129 | 23896247 | 23896539 | + | 1 | OS12G0577800 | CUFF.4040 OS12T05778(i |   | TSS2764 | 9.992E-55 |
| chr12 TCONS_00032879 | XLOC_026136 | 23939786 | 23940043 | + | 1 | OS12G0578500 | CUFF.5195 OS12T05785(i |   | TSS2765 | 2.514E-28 |
| chr12 TCONS_00029016 | XLOC_026141 | 23992029 | 23992235 | + | 1 | OS12G0579450 | CUFF.4042 OS12T05794(i |   | TSS2765 | 1.017E-46 |
| chr12 TCONS_00029029 | XLOC_026154 | 24122763 | 24122982 | + | 1 | NRAMP6       | CUFF.4045 OS12T05816(x |   | TSS2767 | 3.764E-36 |
| chr12 TCONS_00029080 | XLOC_026201 | 24637588 | 24637796 | + | 1 | OS12G0589100 | CUFF.4068 OS12T05891(i |   | TSS2772 | 5.227E-53 |
| chr12 TCONS_00029132 | XLOC_026250 | 25028672 | 25028989 | + | 1 | OS12G0596000 | CUFF.4075 OS12T05960(x |   | TSS2777 | 1.249E-05 |
| chr12 TCONS_00032885 | XLOC_026291 | 25282371 | 25282748 | + | 1 | OS12G0600701 | CUFF.5235 OS12T06007(x |   | TSS2781 | 3.456E-46 |
| chr12 TCONS_00032886 | XLOC_026321 | 25536781 | 25537132 | + | 1 | OS12G0605100 | CUFF.5247 OS12T06051(x |   | TSS2785 | 3.718E-24 |
| chr12 TCONS_00032889 | XLOC_026325 | 25540762 | 25541248 | + | 1 | OS12G0605200 | CUFF.5246 OS12T06052(x |   | TSS2785 | 3.69E-29  |
| chr12 TCONS_00032891 | XLOC_026367 | 25817773 | 25818086 | + | 1 | LOL2         | CUFF.5258 OS12T06110(i |   | TSS2790 | 1.033E-24 |
| chr12 TCONS_00029268 | XLOC_026379 | 25877429 | 25877651 | + | 1 | OS12G0611700 | CUFF.4106 OS12T06117(i |   | TSS2791 | 1.979E-50 |
| chr12 TCONS_00029277 | XLOC_026390 | 25966147 | 25966356 | + | 1 | NA           | CUFF.4105 NA           | u | TSS2792 | 7.896E-81 |
| chr12 TCONS_00032898 | XLOC_026410 | 26110394 | 26110870 | + | 1 | OS12G0615500 | CUFF.5285 OS12T06155(x |   | TSS2794 | 6.268E-22 |
| chr12 TCONS_00032901 | XLOC_026428 | 26213146 | 26213579 | + | 1 | NA           | CUFF.5283 NA           | u | TSS2796 | 2.165E-14 |
| chr12 TCONS_00029328 | XLOC_026442 | 26342531 | 26342756 | + | 1 | OS12G0618400 | CUFF.4131 OS12T06184(i |   | TSS2798 | 5.553E-31 |
| chr12 TCONS_00032907 | XLOC_026464 | 26560824 | 26561052 | + | 1 | NA           | CUFF.5300 NA           | u | TSS2800 | 3.129E-15 |
| chr12 TCONS_00029360 | XLOC_026473 | 26619411 | 26619636 | + | 1 | OS12G0623400 | CUFF.4138 OS12T06234(i |   | TSS2801 | 3.233E-38 |
| chr12 TCONS_00032909 | XLOC_026473 | 26619192 | 26619416 | + | 1 | OS12G0623400 | CUFF.5311 OS12T06234(i |   | TSS2801 | 7.656E-49 |
| chr12 TCONS_00032912 | XLOC_026537 | 27197122 | 27197380 | + | 1 | OS12G0634500 | CUFF.5335 OS12T06345(x |   | TSS2808 | 5.756E-19 |
| chr12 TCONS_00032913 | XLOC_026547 | 27274574 | 27274855 | + | 1 | OS12G0636200 | CUFF.5362 OS12T06362(i |   | TSS2809 | 1.991E-12 |
| chr12 TCONS_00032914 | XLOC_026549 | 27286235 | 27286443 | + | 1 | NA           | CUFF.5336 NA           | u | TSS2809 | 1.033E-24 |
| chr12 TCONS_00029441 | XLOC_026552 | 27305346 | 27305564 | + | 1 | OS12G0637100 | CUFF.4163 OS12T06371(i |   | TSS2809 | 3.488E-37 |
| chr12 TCONS_00032916 | XLOC_026562 | 27402101 | 27402318 | + | 1 | OS12G0638900 | CUFF.5352 OS12T06389(i |   | TSS2810 | 0.005791  |
| chr12 TCONS_00032919 | XLOC_026580 | 27482734 | 27482936 | + | 1 | OS12G0640800 | CUFF.5360 OS12T06408(x |   | TSS2812 | 2.113E-62 |

|                      |             |          |            |   |              |                        |   |         |           |
|----------------------|-------------|----------|------------|---|--------------|------------------------|---|---------|-----------|
| chr12 TCONS_00032921 | XLOC_026582 | 27483834 | 27484135 + | 1 | NA           | CUFF.5353 NA           | u | TSS2812 | 6.994E-29 |
| chr12 TCONS_00032924 | XLOC_026585 | 27484906 | 27485711 + | 1 | NA           | CUFF.5358 NA           | u | TSS2813 | 8.206E-05 |
| chr12 TCONS_00029585 | XLOC_026693 | 658051   | 658423 -   | 1 | OS12G0112800 | CUFF.3404 OS12T01128(x |   | TSS2825 | 0.0013713 |
| chr12 TCONS_00029627 | XLOC_026728 | 942411   | 942614 -   | 1 | OS12G0119700 | CUFF.3413 OS12T01197(i |   | TSS2829 | 0         |
| chr12 TCONS_00032937 | XLOC_026766 | 1196302  | 1196547 -  | 1 | NA           | CUFF.4398 NA           | u | TSS2833 | 9.806E-48 |
| chr12 TCONS_00032938 | XLOC_026794 | 1360946  | 1361151 -  | 1 | OS12G0128700 | CUFF.4421 OS12T01287(i |   | TSS2836 | 5.443E-25 |
| chr12 TCONS_00029698 | XLOC_026795 | 1366524  | 1366750 -  | 1 | NA           | CUFF.3429 NA           | u | TSS2836 | 4.893E-88 |
| chr12 TCONS_00032944 | XLOC_026953 | 2654233  | 2654508 -  | 1 | NA           | CUFF.4479 NA           | u | TSS2852 | 4.127E-14 |
| chr12 TCONS_00029878 | XLOC_026965 | 2720462  | 2720686 -  | 1 | NA           | CUFF.3480 NA           | u | TSS2854 | 8.968E-51 |
| chr12 TCONS_00032946 | XLOC_026969 | 2726277  | 2726525 -  | 1 | OS12G0155300 | CUFF.4498 OS12T01553(x |   | TSS2854 | 0.01177   |
| chr12 TCONS_00032947 | XLOC_026970 | 2728772  | 2729190 -  | 1 | NA           | CUFF.4485 NA           | u | TSS2854 | 1.063E-19 |
| chr12 TCONS_00029958 | XLOC_027042 | 3283276  | 3283567 -  | 1 | NA           | CUFF.3504 NA           | u | TSS2862 | 3.519E-53 |
| chr12 TCONS_00032957 | XLOC_027094 | 3603262  | 3603463 -  | 1 | OS12G0170800 | CUFF.4526 OS12T01708(i |   | TSS2867 | 1.339E-23 |
| chr12 TCONS_00032962 | XLOC_027141 | 4001182  | 4001383 -  | 1 | NA           | CUFF.4548 NA           | u | TSS2872 | 7.048E-34 |
| chr12 TCONS_00032963 | XLOC_027148 | 4041228  | 4041438 -  | 1 | NA           | CUFF.4541 NA           | u | TSS2873 | 9.036E-28 |
| chr12 TCONS_00030109 | XLOC_027192 | 4397965  | 4398354 -  | 1 | OS12G0187500 | CUFF.4564 OS12T01875(x |   | TSS2877 | 5.961E-15 |
| chr12 TCONS_00032966 | XLOC_027193 | 4399899  | 4400513 -  | 1 | OS12G0187500 | CUFF.4565 OS12T01875(x |   | TSS2877 | 0.0003675 |
| chr12 TCONS_00030138 | XLOC_027220 | 4644449  | 4644822 -  | 1 | OS12G0191300 | CUFF.3560 OS12T01913(x |   | TSS2880 | 2.494E-31 |
| chr12 TCONS_00030164 | XLOC_027244 | 4866345  | 4866581 -  | 1 | OS12G0194800 | CUFF.3568 OS12T01948(i |   | TSS2882 | 1.897E-20 |
| chr12 TCONS_00032969 | XLOC_027247 | 4871264  | 4871464 -  | 1 | OS12G0194800 | CUFF.4588 OS12T01948(x |   | TSS2883 | 1.387E-18 |
| chr12 TCONS_00032970 | XLOC_027257 | 5021584  | 5021874 -  | 1 | OS12G0197200 | CUFF.4589 OS12T01972(i |   | TSS2884 | 1.775E-08 |
| chr12 TCONS_00030179 | XLOC_027262 | 5062524  | 5062741 -  | 1 | NA           | CUFF.3569 NA           | u | TSS2884 | 1.291E-45 |
| chr12 TCONS_00030212 | XLOC_027298 | 5421043  | 5421253 -  | 1 | NA           | CUFF.3578 NA           | u | TSS2888 | 3.668E-72 |
| chr12 TCONS_00030213 | XLOC_027299 | 5421794  | 5422203 -  | 1 | NA           | CUFF.3580 NA           | u | TSS2888 | 1.688E-31 |
| chr12 TCONS_00030214 | XLOC_027300 | 5422579  | 5422825 -  | 1 | NA           | CUFF.3579 NA           | u | TSS2888 | 4.606E-19 |
| chr12 TCONS_00030255 | XLOC_027343 | 5736092  | 5737066 -  | 1 | OS12G0209700 | CUFF.3587 OS12T02097(x |   | TSS2892 | 7.122E-10 |
| chr12 TCONS_00032995 | XLOC_027487 | 7318172  | 7319096 -  | 1 | NA           | CUFF.4661 NA           | u | TSS2907 | 3.108E-17 |
| chr12 TCONS_00030509 | XLOC_027589 | 8527005  | 8527251 -  | 1 | NCRNA_34988  | CUFF.4699 NCRNA_349(x  |   | TSS2918 | 5.494E-11 |
| chr12 TCONS_00030517 | XLOC_027600 | 8543439  | 8545509 -  | 1 | NCRNA_1529   | CUFF.3739 NCRNA_152(x  |   | TSS2919 | 4.167E-25 |
| chr12 TCONS_00033010 | XLOC_027623 | 8861591  | 8861792 -  | 1 | NA           | CUFF.4707 NA           | u | TSS2922 | 6.57E-17  |
| chr12 TCONS_00030728 | XLOC_027793 | 10829933 | 10830488 - | 1 | OS12G0285100 | CUFF.3729 OS12T02851(i |   | TSS2940 | 3.482E-71 |
| chr12 TCONS_00033017 | XLOC_027825 | 11137018 | 11137494 - | 1 | NA           | CUFF.4758 NA           | u | TSS2944 | 1.739E-22 |
| chr12 TCONS_00033019 | XLOC_027877 | 11720649 | 11721502 - | 1 | OS12G0297400 | CUFF.4780 OS12T02974(x |   | TSS2949 | 6.573E-06 |
| chr12 TCONS_00033020 | XLOC_027888 | 11863090 | 11863356 - | 1 | OS12G0298600 | CUFF.4793 OS12T02986(i |   | TSS2950 | 3.047E-45 |
| chr12 TCONS_00033022 | XLOC_027898 | 12083896 | 12084116 - | 1 | OS12G0403800 | CUFF.4792 OS12T04038(i |   | TSS2951 | 2.507E-09 |

|                      |             |          |          |   |   |              |           |              |         |           |           |
|----------------------|-------------|----------|----------|---|---|--------------|-----------|--------------|---------|-----------|-----------|
| chr12 TCONS_00033026 | XLOC_027939 | 12429350 | 12429561 | - | 1 | OS12G0409600 | CUFF.4800 | OS12T04096(x | TSS2955 | 3.405E-06 |           |
| chr12 TCONS_00033027 | XLOC_027972 | 12846000 | 12846238 | - | 1 | OS12G0416500 | CUFF.4811 | OS12T04165(x | TSS2959 | 3.017E-66 |           |
| chr12 TCONS_00033032 | XLOC_028012 | 13342314 | 13342746 | - | 1 | NA           | CUFF.4822 | NA           | u       | TSS2963   | 2.978E-15 |
| chr12 TCONS_00030969 | XLOC_028040 | 13405523 | 13405785 | - | 1 | NCRNA_3866   | CUFF.3824 | NCRNA_386(x  | TSS2966 | 6.724E-06 |           |
| chr12 TCONS_00033044 | XLOC_028068 | 13690784 | 13695841 | - | 1 | NA           | CUFF.4849 | NA           | u       | TSS2969   | 6.325E-26 |
| chr12 TCONS_00033049 | XLOC_028244 | 15845775 | 15845983 | - | 1 | OS12G0456100 | CUFF.4890 | OS12T04561(x | TSS2987 | 2.005E-39 |           |
| chr12 TCONS_00033058 | XLOC_028373 | 17494567 | 17494768 | - | 1 | NA           | CUFF.4927 | NA           | u       | TSS3000   | 7.048E-34 |
| chr12 TCONS_00031360 | XLOC_028416 | 17956573 | 17956779 | - | 1 | CYCT1-1      | CUFF.3871 | OS12T04854(i | TSS3005 | 0         |           |
| chr12 TCONS_00033060 | XLOC_028481 | 18791306 | 18791508 | - | 1 | NA           | CUFF.4960 | NA           | u       | TSS3011   | 7.187E-39 |
| chr12 TCONS_00033061 | XLOC_028490 | 18909658 | 18909858 | - | 1 | OS12G0498300 | CUFF.4980 | OS12T04983(x | TSS3012 | 3.301E-22 |           |
| chr12 TCONS_00033063 | XLOC_028495 | 18924721 | 18924946 | - | 1 | NA           | CUFF.4970 | NA           | u       | TSS3013   | 6.174E-32 |
| chr12 TCONS_00031549 | XLOC_028595 | 19635268 | 19635497 | - | 1 | NA           | CUFF.3908 | NA           | u       | TSS3023   | 0         |
| chr12 TCONS_00033066 | XLOC_028596 | 19635889 | 19636230 | - | 1 | NA           | CUFF.5005 | NA           | u       | TSS3023   | 1.19E-21  |
| chr12 TCONS_00031630 | XLOC_028673 | 20459448 | 20463958 | - | 1 | NCRNA_1019   | CUFF.1748 | NCRNA_101(x  | TSS3031 | 3.408E-11 |           |
| chr12 TCONS_00033071 | XLOC_028674 | 20464391 | 20464664 | - | 1 | NA           | CUFF.1748 | NA           | u       | TSS3031   | 1.17E-31  |
| chr12 TCONS_00033073 | XLOC_028681 | 20486778 | 20487125 | - | 1 | NCRNA_1526   | CUFF.1748 | NCRNA_152(x  | TSS3032 | 7.27E-06  |           |
| chr12 TCONS_00031642 | XLOC_028682 | 20501571 | 20502548 | - | 1 | NA           | CUFF.1362 | NA           | u       | TSS3032   | 1.125E-13 |
| chr12 TCONS_00031643 | XLOC_028682 | 20502659 | 20509307 | - | 1 | NCRNA_1551   | CUFF.1362 | NCRNA_155 x  | TSS3032 | 0.0028907 |           |
| chr12 TCONS_00033074 | XLOC_028682 | 20501384 | 20501887 | - | 1 | NA           | CUFF.1749 | NA           | u       | TSS3032   | 6.906E-34 |
| chr12 TCONS_00033078 | XLOC_028683 | 20509469 | 20510009 | - | 1 | NA           | CUFF.1749 | NA           | u       | TSS3033   | 2.02E-19  |
| chr12 TCONS_00033079 | XLOC_028684 | 20510272 | 20510494 | - | 1 | NA           | CUFF.1749 | NA           | u       | TSS3033   | 2.139E-49 |
| chr12 TCONS_00031646 | XLOC_028686 | 20511885 | 20512341 | - | 1 | NA           | CUFF.1362 | NA           | u       | TSS3033   | 1.279E-73 |
| chr12 TCONS_00033080 | XLOC_028688 | 20513390 | 20513858 | - | 1 | NA           | CUFF.1750 | NA           | u       | TSS3033   | 4.079E-14 |
| chr12 TCONS_00033081 | XLOC_028689 | 20513929 | 20515361 | - | 1 | NA           | CUFF.1750 | NA           | u       | TSS3033   | 0.015457  |
| chr12 TCONS_00033082 | XLOC_028690 | 20515432 | 20517723 | - | 1 | NA           | CUFF.1750 | NA           | u       | TSS3033   | 0.38228   |
| chr12 TCONS_00031654 | XLOC_028693 | 20523877 | 20524265 | - | 1 | NCRNA_332    | CUFF.1364 | NCRNA_332 x  | TSS3034 | 0.026127  |           |
| chr12 TCONS_00033084 | XLOC_028694 | 20524350 | 20525276 | - | 1 | NA           | CUFF.1751 | NA           | u       | TSS3034   | 8.923E-05 |
| chr12 TCONS_00033085 | XLOC_028695 | 20525463 | 20526922 | - | 1 | NA           | CUFF.1751 | NA           | u       | TSS3034   | 5.253E-11 |
| chr12 TCONS_00033088 | XLOC_028698 | 20529601 | 20533462 | - | 1 | NCRNA_577    | CUFF.1752 | NCRNA_577 x  | TSS3035 | 0.81945   |           |
| chr12 TCONS_00031662 | XLOC_028699 | 20533654 | 20534981 | - | 1 | NA           | CUFF.1365 | NA           | u       | TSS3035   | 4.407E-05 |
| chr12 TCONS_00033090 | XLOC_028699 | 20534846 | 20535453 | - | 1 | NA           | CUFF.1752 | NA           | u       | TSS3035   | 1.815E-17 |
| chr12 TCONS_00031665 | XLOC_028703 | 20544109 | 20544330 | - | 1 | NA           | CUFF.1365 | NA           | u       | TSS3036   | 7.057E-33 |
| chr12 TCONS_00031666 | XLOC_028704 | 20545795 | 20546035 | - | 1 | NA           | CUFF.1366 | NA           | u       | TSS3036   | 8.21E-69  |
| chr12 TCONS_00033092 | XLOC_028708 | 20576688 | 20577428 | - | 1 | NA           | CUFF.1753 | NA           | u       | TSS3036   | 0.4427    |
| chr12 TCONS_00031677 | XLOC_028715 | 20614053 | 20614360 | - | 1 | NA           | CUFF.1367 | NA           | u       | TSS3037   | 1.54E-16  |

|                      |             |          |          |   |   |              |                        |   |         |           |
|----------------------|-------------|----------|----------|---|---|--------------|------------------------|---|---------|-----------|
| chr12 TCONS_00033094 | XLOC_028717 | 20616767 | 20617027 | - | 1 | NA           | CUFF.1753 NA           | u | TSS3037 | 4.766E-28 |
| chr12 TCONS_00031680 | XLOC_028718 | 20618171 | 20618695 | - | 1 | NA           | CUFF.1367 NA           | u | TSS3037 | 3.005E-10 |
| chr12 TCONS_00031681 | XLOC_028718 | 20618827 | 20621924 | - | 1 | NCRNA_1537   | CUFF.1367 NCRNA_153' x |   | TSS3038 | 0.029993  |
| chr12 TCONS_00033095 | XLOC_028718 | 20617682 | 20618380 | - | 1 | NCRNA_1537   | CUFF.1753 NCRNA_153' x |   | TSS3037 | 5.625E-11 |
| chr12 TCONS_00033096 | XLOC_028718 | 20618420 | 20620289 | - | 1 | NCRNA_1537   | CUFF.1753 NCRNA_153' x |   | TSS3037 | 8.233E-15 |
| chr12 TCONS_00033097 | XLOC_028718 | 20620352 | 20623020 | - | 1 | NA           | CUFF.1753 NA           | u | TSS3038 | 0.0056354 |
| chr12 TCONS_00031683 | XLOC_028719 | 20623111 | 20625635 | - | 1 | NCRNA_1570   | CUFF.1751 NCRNA_157' x |   | TSS3038 | 0.002145  |
| chr12 TCONS_00031684 | XLOC_028720 | 20625708 | 20627198 | - | 1 | NCRNA_1554   | CUFF.1753 NCRNA_155' x |   | TSS3038 | 0.011014  |
| chr12 TCONS_00033099 | XLOC_028722 | 20628010 | 20630137 | - | 1 | NCRNA_1538   | CUFF.1754 NCRNA_153' x |   | TSS3038 | 3.171E-23 |
| chr12 TCONS_00033100 | XLOC_028723 | 20630274 | 20630952 | - | 1 | NA           | CUFF.1754 NA           | u | TSS3039 | 6.826E-30 |
| chr12 TCONS_00031690 | XLOC_028724 | 20631243 | 20631495 | - | 1 | NA           | CUFF.1369 NA           | u | TSS3039 | 1.2E-46   |
| chr12 TCONS_00033101 | XLOC_028724 | 20631313 | 20631614 | - | 1 | NA           | CUFF.1754 NA           | u | TSS3039 | 1.795E-42 |
| chr12 TCONS_00031691 | XLOC_028725 | 20633821 | 20634230 | - | 1 | NA           | CUFF.1369 NA           | u | TSS3039 | 2.836E-58 |
| chr12 TCONS_00033102 | XLOC_028730 | 20644625 | 20644889 | - | 1 | NA           | CUFF.1755 NA           | u | TSS3040 | 0.0007261 |
| chr12 TCONS_00031700 | XLOC_028733 | 20652848 | 20653194 | - | 1 | OS12G0525300 | CUFF.1371 OS12T05253(i |   | TSS3040 | 1.918E-45 |
| chr12 TCONS_00033104 | XLOC_028734 | 20650646 | 20651165 | - | 1 | OS12G0525300 | CUFF.1755 OS12T05253(i |   | TSS3040 | 1.835E-11 |
| chr12 TCONS_00031699 | XLOC_028735 | 20651551 | 20652210 | - | 1 | OS12G0525300 | CUFF.1371 OS12T05253(i |   | TSS3040 | 4.334E-35 |
| chr12 TCONS_00033108 | XLOC_028737 | 20654509 | 20655980 | - | 1 | NA           | CUFF.1756 NA           | u | TSS3041 | 0.0007112 |
| chr12 TCONS_00033109 | XLOC_028738 | 20656056 | 20656420 | - | 1 | NA           | CUFF.1756 NA           | u | TSS3041 | 2.579E-69 |
| chr12 TCONS_00031703 | XLOC_028739 | 20656840 | 20657280 | - | 1 | NA           | CUFF.1371 NA           | u | TSS3041 | 3.249E-09 |
| chr12 TCONS_00031704 | XLOC_028740 | 20657392 | 20657594 | - | 1 | NA           | CUFF.1371 NA           | u | TSS3041 | 2.688E-68 |
| chr12 TCONS_00031705 | XLOC_028741 | 20657737 | 20657982 | - | 1 | NA           | CUFF.1371 NA           | u | TSS3041 | 6.547E-28 |
| chr12 TCONS_00031708 | XLOC_028743 | 20662361 | 20662842 | - | 1 | NA           | CUFF.1372 NA           | u | TSS3041 | 0.098021  |
| chr12 TCONS_00033113 | XLOC_028769 | 20851620 | 20851946 | - | 1 | NA           | CUFF.5051 NA           | u | TSS3044 | 3.802E-12 |
| chr12 TCONS_00033119 | XLOC_028813 | 21330544 | 21330907 | - | 1 | OS12G0536200 | CUFF.5072 OS12T05362(i |   | TSS3048 | 1.959E-24 |
| chr12 TCONS_00031862 | XLOC_028896 | 22052190 | 22052396 | - | 1 | OS12G0545900 | CUFF.3959 OS12T05459(i |   | TSS3057 | 0         |
| chr12 TCONS_00033128 | XLOC_028965 | 22595476 | 22596032 | - | 1 | OS12G0555300 | CUFF.5112 OS12T05553(x |   | TSS3064 | 6.604E-06 |
| chr12 TCONS_00031940 | XLOC_028969 | 22629910 | 22630297 | - | 1 | OS12G0556200 | CUFF.3983 OS12T05562(x |   | TSS3065 | 5.802E-74 |
| chr12 TCONS_00033131 | XLOC_029011 | 23026234 | 23026779 | - | 1 | NA           | CUFF.5127 NA           | u | TSS3069 | 1.512E-25 |
| chr12 TCONS_00031985 | XLOC_029013 | 23027989 | 23028245 | - | 1 | NA           | CUFF.3984 NA           | u | TSS3069 | 7.189E-23 |
| chr12 TCONS_00033138 | XLOC_029019 | 23041453 | 23042488 | - | 1 | NA           | CUFF.5136 NA           | u | TSS3070 | 0.47893   |
| chr12 TCONS_00033143 | XLOC_029050 | 23264828 | 23265047 | - | 1 | NA           | CUFF.5144 NA           | u | TSS3073 | 0.0001868 |
| chr12 TCONS_00033144 | XLOC_029051 | 23266532 | 23267011 | - | 1 | NA           | CUFF.5145 NA           | u | TSS3074 | 2.02E-19  |
| chr12 TCONS_00033147 | XLOC_029056 | 23285123 | 23286148 | - | 1 | NA           | CUFF.5150 NA           | u | TSS3074 | 2.027E-34 |
| chr12 TCONS_00032029 | XLOC_029057 | 23286262 | 23286537 | - | 1 | NA           | CUFF.4001 NA           | u | TSS3075 | 8.942E-30 |

|                      |             |          |            |   |              |                        |   |         |           |
|----------------------|-------------|----------|------------|---|--------------|------------------------|---|---------|-----------|
| chr12 TCONS_00033150 | XLOC_029061 | 23290493 | 23290696 - | 1 | NA           | CUFF.5156 NA           | u | TSS3075 | 6.174E-32 |
| chr12 TCONS_00033153 | XLOC_029116 | 23665969 | 23666170 - | 1 | NA           | CUFF.5175 NA           | u | TSS3081 | 5.365E-66 |
| chr12 TCONS_00033155 | XLOC_029145 | 23838314 | 23838531 - | 1 | NA           | CUFF.5190 NA           | u | TSS3084 | 9.234E-38 |
| chr12 TCONS_00032123 | XLOC_029147 | 23839719 | 23839923 - | 1 | NA           | CUFF.4036 NA           | u | TSS3084 | 0         |
| chr12 TCONS_00033158 | XLOC_029178 | 24139192 | 24139393 - | 1 | OS12G0581700 | CUFF.5199 OS12T05817(i |   | TSS3087 | 1.562E-40 |
| chr12 TCONS_00033161 | XLOC_029225 | 24456602 | 24456816 - | 1 | OS12G0586000 | CUFF.5209 OS12T05860(i |   | TSS3092 | 5.01E-43  |
| chr12 TCONS_00033165 | XLOC_029270 | 24939817 | 24940115 - | 1 | NA           | CUFF.5219 NA           | u | TSS3097 | 4.127E-14 |
| chr12 TCONS_00032268 | XLOC_029289 | 25069811 | 25070052 - | 1 | NA           | CUFF.4070 NA           | u | TSS3099 | 3.19E-28  |
| chr12 TCONS_00032269 | XLOC_029290 | 25070589 | 25070826 - | 1 | NA           | CUFF.4071 NA           | u | TSS3099 | 1.217E-27 |
| chr12 TCONS_00033169 | XLOC_029294 | 25075059 | 25075565 - | 1 | NA           | CUFF.5228 NA           | u | TSS3100 | 8.321E-10 |
| chr12 TCONS_00033171 | XLOC_029300 | 25093738 | 25094062 - | 1 | OS12G0597600 | CUFF.5230 OS12T05976(i |   | TSS3100 | 7.972E-26 |
| chr12 TCONS_00032407 | XLOC_029420 | 26018049 | 26018249 - | 1 | OS12G0613850 | CUFF.5267 OS12T06138(x |   | TSS3114 | 4.807E-06 |
| chr12 TCONS_00033187 | XLOC_029443 | 26173797 | 26174235 - | 1 | NA           | CUFF.5282 NA           | u | TSS3117 | 6.64E-47  |
| chr12 TCONS_00032433 | XLOC_029445 | 26174964 | 26175183 - | 1 | NA           | CUFF.4118 NA           | u | TSS3117 | 2.065E-44 |
| chr12 TCONS_00033189 | XLOC_029446 | 26175342 | 26175828 - | 1 | NA           | CUFF.5277 NA           | u | TSS3117 | 7.271E-16 |
| chr12 TCONS_00032436 | XLOC_029447 | 26176069 | 26176358 - | 1 | NA           | CUFF.4122 NA           | u | TSS3117 | 3.386E-18 |
| chr12 TCONS_00032438 | XLOC_029449 | 26178906 | 26179274 - | 1 | OS12G0616500 | CUFF.4143 OS12T06165(x |   | TSS3117 | 0         |
| chr12 TCONS_00032442 | XLOC_029452 | 26201102 | 26201342 - | 1 | OS12G0616900 | CUFF.4129 OS12T06169(i |   | TSS3118 | 6.072E-25 |
| chr12 TCONS_00033192 | XLOC_029481 | 26461579 | 26461826 - | 1 | NA           | CUFF.5293 NA           | u | TSS3121 | 2.869E-25 |
| chr12 TCONS_00033193 | XLOC_029492 | 26549264 | 26549464 - | 1 | OS12G0621900 | CUFF.5313 OS12T06219(i |   | TSS3122 | 1.512E-25 |
| chr12 TCONS_00033194 | XLOC_029519 | 26824936 | 26825141 - | 1 | NA           | CUFF.5322 NA           | u | TSS3125 | 5.961E-15 |
| chr12 TCONS_00032597 | XLOC_029599 | 27441103 | 27441311 - | 1 | OS12G0639800 | CUFF.4166 OS12T06398(x |   | TSS3133 | 4.391E-34 |
| chr12 TCONS_00032618 | XLOC_029624 | 20511238 | 20511476 . | 1 | NA           | CUFF.1362 NA           | u | TSS3136 | 8.261E-17 |
| chr12 TCONS_00032619 | XLOC_029625 | 20632668 | 20632892 . | 1 | NA           | CUFF.1369 NA           | u | TSS3136 | 6.644E-23 |
| chr12 TCONS_00032620 | XLOC_029626 | 20633087 | 20633328 . | 1 | NA           | CUFF.1369 NA           | u | TSS3136 | 1.738E-21 |
| chr2 TCONS_00033289  | XLOC_029703 | 578009   | 578761 +   | 1 | NA           | CUFF.4203 NA           | u | TSS3145 | 0.059056  |
| chr2 TCONS_00042967  | XLOC_029703 | 578434   | 579011 +   | 1 | NA           | CUFF.5403 NA           | u | TSS3145 | 1.129E-76 |
| chr2 TCONS_00033323  | XLOC_029739 | 752920   | 753422 +   | 1 | NA           | CUFF.4214 NA           | u | TSS3148 | 2.451E-67 |
| chr2 TCONS_00042975  | XLOC_029740 | 753695   | 753814 +   | 1 | NA           | CUFF.5418 NA           | u | TSS3148 | 7.187E-39 |
| chr2 TCONS_00033332  | XLOC_029748 | 784526   | 784741 +   | 1 | OS02G0114600 | CUFF.4223 OS02T01146(i |   | TSS3149 | 4.455E-39 |
| chr2 TCONS_00042977  | XLOC_029748 | 784142   | 784567 +   | 1 | OS02G0114600 | CUFF.5428 OS02T01146(i |   | TSS3149 | 0.10773   |
| chr2 TCONS_00042979  | XLOC_029767 | 842076   | 842444 +   | 1 | OS02G0115900 | CUFF.5504 OS02T01159(i |   | TSS3151 | 5.076E-11 |
| chr2 TCONS_00042982  | XLOC_029805 | 1050141  | 1050345 +  | 1 | NA           | CUFF.5446 NA           | u | TSS3155 | 3.45E-60  |
| chr2 TCONS_00033396  | XLOC_029815 | 1102283  | 1102483 +  | 1 | NA           | CUFF.4238 NA           | u | TSS3156 | 0         |
| chr2 TCONS_00042985  | XLOC_029874 | 1465527  | 1465749 +  | 1 | OS02G0128300 | CUFF.5483 OS02T01283(i |   | TSS3163 | 1.033E-24 |



|      |                |             |         |         |   |   |              |                        |   |         |           |
|------|----------------|-------------|---------|---------|---|---|--------------|------------------------|---|---------|-----------|
| chr2 | TCONS_00033469 | XLOC_029882 | 1549932 | 1550171 | + | 1 | NA           | CUFF.4262 NA           | u | TSS3163 | 3.081E-16 |
| chr2 | TCONS_00033470 | XLOC_029884 | 1550909 | 1551316 | + | 1 | NA           | CUFF.4264 NA           | u | TSS3164 | 1.227E-15 |
| chr2 | TCONS_00042987 | XLOC_029884 | 1550777 | 1551215 | + | 1 | NA           | CUFF.5476 NA           | u | TSS3164 | 5.02E-16  |
| chr2 | TCONS_00033508 | XLOC_029919 | 1757077 | 1757438 | + | 1 | NA           | CUFF.4279 NA           | u | TSS3168 | 0.12416   |
| chr2 | TCONS_00033509 | XLOC_029924 | 1761136 | 1761451 | + | 1 | NA           | CUFF.4281 NA           | u | TSS3168 | 1.472E-26 |
| chr2 | TCONS_00033510 | XLOC_029925 | 1761802 | 1762094 | + | 1 | NA           | CUFF.4282 NA           | u | TSS3168 | 8.615E-74 |
| chr2 | TCONS_00033518 | XLOC_029932 | 1817401 | 1817602 | + | 1 | OS02G0134300 | CUFF.4285 OS02T01343(i |   | TSS3169 | 0         |
| chr2 | TCONS_00043006 | XLOC_030032 | 2645878 | 2646078 | + | 1 | MPK3         | CUFF.5546 OS02T01481(i |   | TSS3180 | 1.508E-30 |
| chr2 | TCONS_00033668 | XLOC_030073 | 2880614 | 2880837 | + | 1 | OS02G0152500 | CUFF.4345 OS02T01525(i |   | TSS3185 | 2.741E-25 |
| chr2 | TCONS_00033671 | XLOC_030076 | 2900396 | 2900632 | + | 1 | OS02G0152600 | CUFF.4338 OS02T01526(i |   | TSS3185 | 5.588E-26 |
| chr2 | TCONS_00043020 | XLOC_030139 | 3246468 | 3246713 | + | 1 | NA           | CUFF.5584 NA           | u | TSS3192 | 1.168E-26 |
| chr2 | TCONS_00043023 | XLOC_030143 | 3249029 | 3249299 | + | 1 | NA           | CUFF.5585 NA           | u | TSS3192 | 6.569E-08 |
| chr2 | TCONS_00033778 | XLOC_030191 | 3497692 | 3497902 | + | 1 | OS02G0165000 | CUFF.4388 OS02T01650(x |   | TSS3197 | 1.04E-76  |
| chr2 | TCONS_00043041 | XLOC_030276 | 4017760 | 4018140 | + | 1 | NA           | CUFF.5669 NA           | u | TSS3207 | 6.161E-27 |
| chr2 | TCONS_00033872 | XLOC_030277 | 4018694 | 4018974 | + | 1 | NA           | CUFF.4411 NA           | u | TSS3207 | 0         |
| chr2 | TCONS_00043044 | XLOC_030309 | 4205289 | 4205767 | + | 1 | OS02G0176700 | CUFF.5692 OS02T01767(i |   | TSS3210 | 7.297E-19 |
| chr2 | TCONS_00033906 | XLOC_030310 | 4207634 | 4207899 | + | 1 | OS02G0176700 | CUFF.4422 OS02T01767(i |   | TSS3210 | 0         |
| chr2 | TCONS_00043045 | XLOC_030311 | 4210545 | 4210904 | + | 1 | NA           | CUFF.5694 NA           | u | TSS3210 | 2.109E-23 |
| chr2 | TCONS_00033949 | XLOC_030353 | 4501612 | 4501868 | + | 1 | OS02G0180800 | CUFF.4440 OS02T01808(i |   | TSS3215 | 0         |
| chr2 | TCONS_00033950 | XLOC_030354 | 4503497 | 4503764 | + | 1 | OS02G0180800 | CUFF.4442 OS02T01808(i |   | TSS3215 | 3.174E-60 |
| chr2 | TCONS_00033953 | XLOC_030357 | 4510731 | 4510938 | + | 1 | OS02G0180800 | CUFF.4445 OS02T01808(i |   | TSS3215 | 0         |
| chr2 | TCONS_00033954 | XLOC_030358 | 4511448 | 4511685 | + | 1 | OS02G0180800 | CUFF.4449 OS02T01808(i |   | TSS3215 | 2.272E-18 |
| chr2 | TCONS_00043055 | XLOC_030387 | 4683104 | 4683415 | + | 1 | OS02G0184000 | CUFF.5710 OS02T01840(i |   | TSS3218 | 4.766E-28 |
| chr2 | TCONS_00043056 | XLOC_030408 | 4811785 | 4811992 | + | 1 | OS02G0186500 | CUFF.5721 OS02T01865(i |   | TSS3221 | 4.359E-41 |
| chr2 | TCONS_00034015 | XLOC_030419 | 4888321 | 4888522 | + | 1 | OS02G0188000 | CUFF.4461 OS02T01880(x |   | TSS3222 | 2.957E-61 |
| chr2 | TCONS_00043060 | XLOC_030446 | 5045276 | 5045504 | + | 1 | OS02G0190900 | CUFF.5743 OS02T01909(x |   | TSS3225 | 2.397E-85 |
| chr2 | TCONS_00034049 | XLOC_030454 | 5060399 | 5060599 | + | 1 | OS02G0191300 | CUFF.4479 OS02T01913(i |   | TSS3226 | 0         |
| chr2 | TCONS_00043065 | XLOC_030462 | 5112176 | 5112425 | + | 1 | OS02G0192001 | CUFF.5768 OS02T01920(x |   | TSS3226 | 2.02E-19  |
| chr2 | TCONS_00043066 | XLOC_030465 | 5119603 | 5119845 | + | 1 | OS02G0192100 | CUFF.5760 OS02T01921(x |   | TSS3227 | 3.718E-24 |
| chr2 | TCONS_00034066 | XLOC_030473 | 5194361 | 5194579 | + | 1 | OS02G0193300 | CUFF.4482 OS02T01933(x |   | TSS3228 | 2.532E-36 |
| chr2 | TCONS_00034075 | XLOC_030482 | 5222488 | 5222778 | + | 1 | NA           | CUFF.4493 NA           | u | TSS3228 | 3.158E-12 |
| chr2 | TCONS_00034079 | XLOC_030486 | 5224921 | 5225134 | + | 1 | NA           | CUFF.4489 NA           | u | TSS3229 | 9.923E-24 |
| chr2 | TCONS_00043071 | XLOC_030493 | 5237654 | 5237928 | + | 1 | NCRNA_313    | CUFF.5774 NCRNA_313 x  |   | TSS3230 | 1.066E-57 |
| chr2 | TCONS_00043072 | XLOC_030501 | 5346638 | 5347004 | + | 1 | SAP4         | CUFF.5785 OS02T01956(i |   | TSS3231 | 2.708E-34 |
| chr2 | TCONS_00034101 | XLOC_030508 | 5372242 | 5372632 | + | 1 | NA           | CUFF.4508 NA           | u | TSS3231 | 7.19E-05  |

|      |                |             |         |         |   |   |              |                         |   |         |           |
|------|----------------|-------------|---------|---------|---|---|--------------|-------------------------|---|---------|-----------|
| chr2 | TCONS_00034107 | XLOC_030513 | 5425003 | 5425215 | + | 1 | NA           | CUFF.4511 NA            | u | TSS3232 | 6.218E-73 |
| chr2 | TCONS_00043073 | XLOC_030520 | 5508587 | 5508937 | + | 1 | OS02G0198333 | CUFF.5792 OS02T019833(x |   | TSS3233 | 3.129E-15 |
| chr2 | TCONS_00043074 | XLOC_030523 | 5534621 | 5534821 | + | 1 | OS02G0198700 | CUFF.5796 OS02T019870(i |   | TSS3233 | 3.796E-39 |
| chr2 | TCONS_00043077 | XLOC_030542 | 5643093 | 5643299 | + | 1 | HSP23.6      | CUFF.5822 OS02T020100(i |   | TSS3235 | 1.758E-06 |
| chr2 | TCONS_00034142 | XLOC_030549 | 5693768 | 5693972 | + | 1 | OS02G0201900 | CUFF.4536 OS02T020190(i |   | TSS3236 | 1.911E-56 |
| chr2 | TCONS_00043081 | XLOC_030557 | 5748457 | 5748667 | + | 1 | NA           | CUFF.5803 NA            | u | TSS3236 | 0         |
| chr2 | TCONS_00043082 | XLOC_030558 | 5749346 | 5749550 | + | 1 | NA           | CUFF.5801 NA            | u | TSS3236 | 2.529E-33 |
| chr2 | TCONS_00043088 | XLOC_030573 | 5862810 | 5863166 | + | 1 | NA           | CUFF.5824 NA            | u | TSS3238 | 6.268E-22 |
| chr2 | TCONS_00043089 | XLOC_030580 | 5919781 | 5919986 | + | 1 | OS02G0205300 | CUFF.5838 OS02T020530(i |   | TSS3239 | 5.443E-25 |
| chr2 | TCONS_00043090 | XLOC_030588 | 5966440 | 5966771 | + | 1 | OS02G0206400 | CUFF.5840 OS02T020640(i |   | TSS3240 | 0.57062   |
| chr2 | TCONS_00034213 | XLOC_030629 | 6210511 | 6210717 | + | 1 | OS02G0211150 | CUFF.4559 OS02T021115(i |   | TSS3244 | 0         |
| chr2 | TCONS_00043102 | XLOC_030658 | 6408348 | 6408548 | + | 1 | NA           | CUFF.5859 NA            | u | TSS3247 | 1.501E-13 |
| chr2 | TCONS_00034262 | XLOC_030679 | 6527976 | 6528178 | + | 1 | NA           | CUFF.4570 NA            | u | TSS3250 | 0         |
| chr2 | TCONS_00043108 | XLOC_030681 | 6542714 | 6543019 | + | 1 | NA           | CUFF.5879 NA            | u | TSS3250 | 6.174E-32 |
| chr2 | TCONS_00043109 | XLOC_030683 | 6566054 | 6566256 | + | 1 | NA           | CUFF.5883 NA            | u | TSS3250 | 1.804E-24 |
| chr2 | TCONS_00043111 | XLOC_030709 | 6727684 | 6727893 | + | 1 | OS02G0220700 | CUFF.5899 OS02T022070(i |   | TSS3253 | 1.063E-19 |
| chr2 | TCONS_00034291 | XLOC_030711 | 6744780 | 6744990 | + | 1 | OS02G0221100 | CUFF.4579 OS02T022110(x |   | TSS3253 | 2.603E-09 |
| chr2 | TCONS_00034332 | XLOC_030752 | 7045887 | 7046143 | + | 1 | NA           | CUFF.4587 NA            | u | TSS3257 | 0         |
| chr2 | TCONS_00034356 | XLOC_030772 | 7130328 | 7130545 | + | 1 | OS02G0227000 | CUFF.4601 OS02T022700(i |   | TSS3260 | 6.512E-29 |
| chr2 | TCONS_00043119 | XLOC_030808 | 7429191 | 7429393 | + | 1 | NA           | CUFF.5932 NA            | u | TSS3263 | 1.335E-33 |
| chr2 | TCONS_00043123 | XLOC_030831 | 7630541 | 7630946 | + | 1 | NA           | CUFF.5943 NA            | u | TSS3266 | 1.125E-44 |
| chr2 | TCONS_00034417 | XLOC_030832 | 7632219 | 7632420 | + | 1 | OS02G0234800 | CUFF.4618 OS02T023480(i |   | TSS3266 | 0         |
| chr2 | TCONS_00043126 | XLOC_030858 | 7845590 | 7846051 | + | 1 | OS02G0238500 | CUFF.5951 OS02T023850(x |   | TSS3269 | 2.654E-11 |
| chr2 | TCONS_00043128 | XLOC_030870 | 7995867 | 7996068 | + | 1 | OS02G0241300 | CUFF.5956 OS02T024130(i |   | TSS3270 | 1.339E-23 |
| chr2 | TCONS_00034504 | XLOC_030917 | 8339216 | 8339419 | + | 1 | OS02G0247200 | CUFF.4640 OS02T024720(i |   | TSS3275 | 0         |
| chr2 | TCONS_00043136 | XLOC_030925 | 8383171 | 8383581 | + | 1 | OS02G0248200 | CUFF.5984 OS02T024820(x |   | TSS3276 | 2.576E-38 |
| chr2 | TCONS_00034520 | XLOC_030935 | 8453033 | 8453241 | + | 1 | NA           | CUFF.4636 NA            | u | TSS3277 | 0         |
| chr2 | TCONS_00043137 | XLOC_030947 | 8555645 | 8556097 | + | 1 | OS02G0252100 | CUFF.5997 OS02T025210(i |   | TSS3278 | 6.57E-17  |
| chr2 | TCONS_00043138 | XLOC_030948 | 8556398 | 8556675 | + | 1 | OS02G0252100 | CUFF.5986 OS02T025210(x |   | TSS3278 | 1.748E-37 |
| chr2 | TCONS_00043144 | XLOC_030974 | 8735540 | 8735748 | + | 1 | NA           | CUFF.5991 NA            | u | TSS3281 | 4.824E-23 |
| chr2 | TCONS_00043145 | XLOC_030975 | 8735881 | 8736192 | + | 1 | NA           | CUFF.5994 NA            | u | TSS3281 | 7.972E-26 |
| chr2 | TCONS_00043146 | XLOC_030976 | 8736299 | 8736939 | + | 1 | NA           | CUFF.5998 NA            | u | TSS3281 | 7.264E-12 |
| chr2 | TCONS_00043150 | XLOC_031077 | 9534910 | 9535139 | + | 1 | NA           | CUFF.6041 NA            | u | TSS3292 | 1.739E-22 |
| chr2 | TCONS_00043152 | XLOC_031094 | 9622811 | 9623015 | + | 1 | OS02G0269000 | CUFF.6052 OS02T026900(i |   | TSS3294 | 5.595E-40 |
| chr2 | TCONS_00034689 | XLOC_031102 | 9655147 | 9655453 | + | 1 | OS02G0269600 | CUFF.4707 OS02T026960(x |   | TSS3294 | 3.132E-05 |

|      |                |             |          |          |   |   |              |                        |   |         |           |
|------|----------------|-------------|----------|----------|---|---|--------------|------------------------|---|---------|-----------|
| chr2 | TCONS_00034693 | XLOC_031106 | 9712397  | 9712604  | + | 1 | NA           | CUFF.4692 NA           | u | TSS3295 | 7.896E-81 |
| chr2 | TCONS_00034725 | XLOC_031132 | 9915630  | 9915906  | + | 1 | OS02G0272800 | CUFF.4706 OS02T02728(i |   | TSS3298 | 2.223E-43 |
| chr2 | TCONS_00043154 | XLOC_031133 | 9916364  | 9916656  | + | 1 | OS02G0272800 | CUFF.6070 OS02T02728(i |   | TSS3298 | 3.258E-32 |
| chr2 | TCONS_00043155 | XLOC_031135 | 9917328  | 9917563  | + | 1 | OS02G0272800 | CUFF.6074 OS02T02728(i |   | TSS3298 | 5.476E-35 |
| chr2 | TCONS_00043156 | XLOC_031136 | 9921987  | 9922293  | + | 1 | NA           | CUFF.6058 NA           | u | TSS3298 | 6.604E-06 |
| chr2 | TCONS_00043158 | XLOC_031137 | 9922894  | 9923241  | + | 1 | NA           | CUFF.6060 NA           | u | TSS3298 | 1.14E-05  |
| chr2 | TCONS_00043159 | XLOC_031138 | 9926337  | 9926547  | + | 1 | OS02G0272900 | CUFF.6063 OS02T02729(i |   | TSS3298 | 2.02E-19  |
| chr2 | TCONS_00043163 | XLOC_031142 | 9934797  | 9935013  | + | 1 | OS02G0273000 | CUFF.6078 OS02T02730(x |   | TSS3299 | 5.076E-11 |
| chr2 | TCONS_00043164 | XLOC_031143 | 9935976  | 9936219  | + | 1 | OS02G0273000 | CUFF.6083 OS02T02730(x |   | TSS3299 | 8.626E-16 |
| chr2 | TCONS_00043165 | XLOC_031155 | 10083567 | 10083779 | + | 1 | NA           | CUFF.6069 NA           | u | TSS3300 | 1.508E-30 |
| chr2 | TCONS_00043166 | XLOC_031156 | 10083996 | 10084207 | + | 1 | NA           | CUFF.6072 NA           | u | TSS3300 | 9.158E-23 |
| chr2 | TCONS_00034744 | XLOC_031158 | 10091358 | 10091761 | + | 1 | OS02G0275200 | CUFF.4720 OS02T02752(i |   | TSS3300 | 5.632E-31 |
| chr2 | TCONS_00043168 | XLOC_031161 | 10094904 | 10095128 | + | 1 | OS02G0275200 | CUFF.6079 OS02T02752(x |   | TSS3301 | 0         |
| chr2 | TCONS_00034811 | XLOC_031219 | 10776481 | 10776695 | + | 1 | OS02G0286700 | CUFF.4728 OS02T02867(x |   | TSS3307 | 1.336E-34 |
| chr2 | TCONS_00034812 | XLOC_031220 | 10777510 | 10778377 | + | 1 | NA           | CUFF.4727 NA           | u | TSS3307 | 1.839E-35 |
| chr2 | TCONS_00043173 | XLOC_031220 | 10777423 | 10777665 | + | 1 | NA           | CUFF.6097 NA           | u | TSS3307 | 1.283E-05 |
| chr2 | TCONS_00043174 | XLOC_031225 | 10822369 | 10822607 | + | 1 | NA           | CUFF.6100 NA           | u | TSS3308 | 7.187E-39 |
| chr2 | TCONS_00034831 | XLOC_031240 | 10986017 | 10986676 | + | 1 | OS02G0290300 | CUFF.4745 OS02T02903(x |   | TSS3309 | 6.086E-18 |
| chr2 | TCONS_00034851 | XLOC_031261 | 11164629 | 11164844 | + | 1 | OS02G0293500 | CUFF.4748 OS02T02935(x |   | TSS3312 | 2.741E-25 |
| chr2 | TCONS_00043179 | XLOC_031262 | 11168220 | 11168464 | + | 1 | NA           | CUFF.6111 NA           | u | TSS3312 | 6.161E-27 |
| chr2 | TCONS_00043180 | XLOC_031263 | 11170077 | 11170562 | + | 1 | NA           | CUFF.6115 NA           | u | TSS3312 | 1.758E-06 |
| chr2 | TCONS_00043181 | XLOC_031271 | 11213160 | 11213560 | + | 1 | NCRNA_5025   | CUFF.6113 NCRNA_502:x  |   | TSS3313 | 1.713E-27 |
| chr2 | TCONS_00034863 | XLOC_031272 | 11215152 | 11215379 | + | 1 | NA           | CUFF.4746 NA           | u | TSS3313 | 7.436E-14 |
| chr2 | TCONS_00043185 | XLOC_031305 | 11701743 | 11702001 | + | 1 | OS02G0301800 | CUFF.6135 OS02T03018(x |   | TSS3317 | 5.961E-15 |
| chr2 | TCONS_00043186 | XLOC_031333 | 12026262 | 12026645 | + | 1 | OS02G0307000 | CUFF.6155 OS02T03070(i |   | TSS3320 | 1.947E-29 |
| chr2 | TCONS_00043188 | XLOC_031381 | 12528471 | 12528735 | + | 1 | NA           | CUFF.6156 NA           | u | TSS3325 | 9.712E-11 |
| chr2 | TCONS_00034982 | XLOC_031391 | 12632941 | 12633144 | + | 1 | OS02G0317800 | CUFF.4797 OS02T03178(i |   | TSS3326 | 0         |
| chr2 | TCONS_00043191 | XLOC_031391 | 12632729 | 12633100 | + | 1 | OS02G0317800 | CUFF.6173 OS02T03178(i |   | TSS3326 | 4.2E-31   |
| chr2 | TCONS_00043193 | XLOC_031399 | 12734489 | 12734705 | + | 1 | NA           | CUFF.6183 NA           | u | TSS3327 | 3.301E-22 |
| chr2 | TCONS_00035014 | XLOC_031424 | 13002163 | 13002424 | + | 1 | NA           | CUFF.4800 NA           | u | TSS3329 | 3.908E-74 |
| chr2 | TCONS_00035031 | XLOC_031441 | 13183237 | 13183448 | + | 1 | OS02G0327100 | CUFF.4811 OS02T03271(x |   | TSS3331 | 0         |
| chr2 | TCONS_00043197 | XLOC_031464 | 13462376 | 13462591 | + | 1 | NA           | CUFF.6211 NA           | u | TSS3333 | 6.161E-27 |
| chr2 | TCONS_00035075 | XLOC_031487 | 13847143 | 13847354 | + | 1 | OS02G0435000 | CUFF.4830 OS02T04350(i |   | TSS3336 | 1.578E-37 |
| chr2 | TCONS_00035097 | XLOC_031508 | 14072253 | 14072468 | + | 1 | NA           | CUFF.4828 NA           | u | TSS3338 | 5.847E-46 |
| chr2 | TCONS_00043206 | XLOC_031524 | 14254388 | 14254957 | + | 1 | NA           | CUFF.6247 NA           | u | TSS3340 | 3.24E-32  |

|      |                |             |          |          |   |   |              |           |              |         |           |           |
|------|----------------|-------------|----------|----------|---|---|--------------|-----------|--------------|---------|-----------|-----------|
| chr2 | TCONS_00043210 | XLOC_031553 | 14536161 | 14536529 | + | 1 | OS02G0448400 | CUFF.6269 | OS02T04484(x | TSS3343 | 7.264E-12 |           |
| chr2 | TCONS_00035171 | XLOC_031580 | 14945875 | 14946082 | + | 1 | OS02G0452500 | CUFF.4866 | OS02T04525(x | TSS3346 | 9.991E-55 |           |
| chr2 | TCONS_00043215 | XLOC_031581 | 14949599 | 14949873 | + | 1 | OS02G0452500 | CUFF.6284 | OS02T04525(x | TSS3346 | 3.047E-45 |           |
| chr2 | TCONS_00043217 | XLOC_031585 | 14954583 | 14955148 | + | 1 | OS02G0452500 | CUFF.6290 | OS02T04525(x | TSS3346 | 9.712E-11 |           |
| chr2 | TCONS_00043220 | XLOC_031588 | 14958591 | 14958792 | + | 1 | OS02G0452500 | CUFF.6295 | OS02T04525(x | TSS3347 | 2.943E-20 |           |
| chr2 | TCONS_00043225 | XLOC_031639 | 15475491 | 15475697 | + | 1 | OS02G0461600 | CUFF.6319 | OS02T04616(i | TSS3352 | 2.863E-13 |           |
| chr2 | TCONS_00043226 | XLOC_031651 | 15603727 | 15604331 | + | 1 | OS02G0464550 | CUFF.6310 | OS02T04645(i | TSS3354 | 3.624E-65 |           |
| chr2 | TCONS_00043227 | XLOC_031652 | 15604601 | 15604968 | + | 1 | OS02G0464550 | CUFF.6314 | OS02T04645(i | TSS3354 | 4.824E-23 |           |
| chr2 | TCONS_00043233 | XLOC_031690 | 15935279 | 15935664 | + | 1 | NA           | CUFF.6334 | NA           | u       | TSS3358   | 5.759E-25 |
| chr2 | TCONS_00043236 | XLOC_031694 | 15938576 | 15938913 | + | 1 | NA           | CUFF.6335 | NA           | u       | TSS3358   | 1.217E-39 |
| chr2 | TCONS_00035286 | XLOC_031696 | 15939715 | 15939955 | + | 1 | NA           | CUFF.4879 | NA           | u       | TSS3359   | 1.974E-08 |
| chr2 | TCONS_00043237 | XLOC_031696 | 15939547 | 15939771 | + | 1 | NA           | CUFF.6338 | NA           | u       | TSS3358   | 6.232E-55 |
| chr2 | TCONS_00035292 | XLOC_031705 | 15945373 | 15945746 | + | 1 | NA           | CUFF.4884 | NA           | u       | TSS3360   | 3.716E-17 |
| chr2 | TCONS_00035293 | XLOC_031706 | 15946873 | 15947175 | + | 1 | NA           | CUFF.4886 | NA           | u       | TSS3360   | 1.986E-34 |
| chr2 | TCONS_00043244 | XLOC_031707 | 15949172 | 15949457 | + | 1 | NA           | CUFF.6348 | NA           | u       | TSS3360   | 0.0001106 |
| chr2 | TCONS_00043245 | XLOC_031708 | 15955408 | 15955677 | + | 1 | OS02G0470600 | CUFF.6357 | OS02T04706(i | TSS3360 | 7.959E-31 |           |
| chr2 | TCONS_00035295 | XLOC_031710 | 15973032 | 15973281 | + | 1 | OS02G0470600 | CUFF.4904 | OS02T04706(i | TSS3360 | 4.446E-08 |           |
| chr2 | TCONS_00043246 | XLOC_031711 | 15974505 | 15974713 | + | 1 | OS02G0470600 | CUFF.6366 | OS02T04706(i | TSS3360 | 1.063E-19 |           |
| chr2 | TCONS_00043249 | XLOC_031733 | 16116979 | 16117428 | + | 1 | OS02G0473200 | CUFF.6362 | OS02T04732(i | TSS3362 | 3.69E-29  |           |
| chr2 | TCONS_00043250 | XLOC_031752 | 16364278 | 16364656 | + | 1 | OS02G0477700 | CUFF.6367 | OS02T04777(x | TSS3364 | 4.877E-38 |           |
| chr2 | TCONS_00035362 | XLOC_031776 | 16609205 | 16609456 | + | 1 | NA           | CUFF.4906 | NA           | u       | TSS3367   | 8.802E-68 |
| chr2 | TCONS_00035394 | XLOC_031807 | 16983759 | 16984333 | + | 1 | OS02G0488600 | CUFF.4922 | OS02T04886(i | TSS3370 | 1.154E-86 |           |
| chr2 | TCONS_00035395 | XLOC_031808 | 16984746 | 16985019 | + | 1 | OS02G0488600 | CUFF.4924 | OS02T04886(i | TSS3370 | 0.018843  |           |
| chr2 | TCONS_00035603 | XLOC_031993 | 18579718 | 18580354 | + | 1 | OS02G0515200 | CUFF.4975 | OS02T05152(i | TSS3390 | 3.246E-29 |           |
| chr2 | TCONS_00043262 | XLOC_032029 | 18988286 | 18988754 | + | 1 | NA           | CUFF.8360 | NA           | u       | TSS3394   | 8.925E-46 |
| chr2 | TCONS_00035646 | XLOC_032031 | 18999355 | 18999640 | + | 1 | OS02G0521300 | CUFF.4983 | OS02T05213(i | TSS3394 | 1.11E-13  |           |
| chr2 | TCONS_00035647 | XLOC_032031 | 18999898 | 19000233 | + | 1 | OS02G0521300 | CUFF.4984 | OS02T05213(i | TSS3394 | 9.83E-24  |           |
| chr2 | TCONS_00043263 | XLOC_032031 | 18999460 | 18999964 | + | 1 | OS02G0521300 | CUFF.8390 | OS02T05213(x | TSS3394 | 6.994E-29 |           |
| chr2 | TCONS_00043267 | XLOC_032080 | 19346814 | 19347108 | + | 1 | OS02G0528000 | CUFF.6467 | OS02T05280(x | TSS3399 | 5.443E-25 |           |
| chr2 | TCONS_00035704 | XLOC_032090 | 19402490 | 19402712 | + | 1 | NA           | CUFF.4993 | NA           | u       | TSS3400   | 2.074E-19 |
| chr2 | TCONS_00043270 | XLOC_032091 | 19402983 | 19403318 | + | 1 | NA           | CUFF.6462 | NA           | u       | TSS3400   | 5.592E-20 |
| chr2 | TCONS_00043275 | XLOC_032097 | 19415457 | 19416231 | + | 1 | OS02G0528900 | CUFF.6494 | OS02T05289(i | TSS3401 | 0.82581   |           |
| chr2 | TCONS_00043276 | XLOC_032098 | 19417072 | 19417395 | + | 1 | OS02G0528900 | CUFF.6502 | OS02T05289(i | TSS3401 | 3.802E-12 |           |
| chr2 | TCONS_00043278 | XLOC_032103 | 19450118 | 19450319 | + | 1 | NA           | CUFF.6475 | NA           | u       | TSS3401   | 6.268E-22 |
| chr2 | TCONS_00043282 | XLOC_032146 | 19711349 | 19711706 | + | 1 | OS02G0534800 | CUFF.6504 | OS02T05348(i | TSS3406 | 3.405E-06 |           |

|      |                |             |          |          |   |   |              |           |              |         |           |           |
|------|----------------|-------------|----------|----------|---|---|--------------|-----------|--------------|---------|-----------|-----------|
| chr2 | TCONS_00035754 | XLOC_032147 | 19712597 | 19712868 | + | 1 | OS02G0534800 | CUFF.5016 | OS02T05348(i | TSS3406 | 0         |           |
| chr2 | TCONS_00035781 | XLOC_032175 | 19917329 | 19917624 | + | 1 | OS02G0537900 | CUFF.6512 | OS02T05379(i | TSS3409 | 2.064E-44 |           |
| chr2 | TCONS_00043287 | XLOC_032228 | 20488728 | 20489277 | + | 1 | OS02G0546400 | CUFF.6540 | OS02T05464(i | TSS3414 | 1.136E-14 |           |
| chr2 | TCONS_00043289 | XLOC_032261 | 20748347 | 20748605 | + | 1 | OS02G0551100 | CUFF.6555 | OS02T05511(i | TSS3418 | 0.0003675 |           |
| chr2 | TCONS_00035879 | XLOC_032267 | 20784113 | 20784461 | + | 1 | OS02G0551700 | CUFF.5054 | OS02T05517(x | TSS3418 | 1.503E-65 |           |
| chr2 | TCONS_00035880 | XLOC_032268 | 20785547 | 20785786 | + | 1 | NA           | CUFF.5049 | NA           | u       | TSS3419   | 1.672E-17 |
| chr2 | TCONS_00043291 | XLOC_032269 | 20786252 | 20786515 | + | 1 | NA           | CUFF.6551 | NA           | u       | TSS3419   | 2.216E-26 |
| chr2 | TCONS_00035906 | XLOC_032295 | 20928305 | 20928760 | + | 1 | OS02G0554300 | CUFF.5060 | OS02T05543(i | TSS3421 | 2.713E-71 |           |
| chr2 | TCONS_00043299 | XLOC_032331 | 21105371 | 21105781 | + | 1 | OS02G0557300 | CUFF.6571 | OS02T05573(i | TSS3425 | 3.718E-24 |           |
| chr2 | TCONS_00035942 | XLOC_032333 | 21117550 | 21117773 | + | 1 | OS02G0557600 | CUFF.5073 | OS02T05576(i | TSS3425 | 1.563E-27 |           |
| chr2 | TCONS_00043304 | XLOC_032388 | 21496380 | 21496584 | + | 1 | NA           | CUFF.6581 | NA           | u       | TSS3431   | 5.592E-20 |
| chr2 | TCONS_00043305 | XLOC_032389 | 21501005 | 21501437 | + | 1 | NA           | CUFF.6583 | NA           | u       | TSS3431   | 2.216E-26 |
| chr2 | TCONS_00036025 | XLOC_032410 | 21648015 | 21648252 | + | 1 | NA           | CUFF.5083 | NA           | u       | TSS3434   | 0         |
| chr2 | TCONS_00043308 | XLOC_032411 | 21648740 | 21648950 | + | 1 | NCRNA_34463  | CUFF.6592 | NCRNA_344(x  | TSS3434 | 3.127E-63 |           |
| chr2 | TCONS_00043309 | XLOC_032425 | 21811374 | 21811615 | + | 1 | CYP71Z7      | CUFF.6611 | OS02T05707(x | TSS3435 | 2.303E-41 |           |
| chr2 | TCONS_00036062 | XLOC_032447 | 21929381 | 21929761 | + | 1 | NA           | CUFF.5097 | NA           | u       | TSS3437   | 5.848E-09 |
| chr2 | TCONS_00036063 | XLOC_032448 | 21929856 | 21930302 | + | 1 | NA           | CUFF.5098 | NA           | u       | TSS3437   | 8.42E-07  |
| chr2 | TCONS_00043311 | XLOC_032450 | 21934747 | 21934949 | + | 1 | RIBA2        | CUFF.6617 | OS02T05724(i | TSS3438 | 6.57E-17  |           |
| chr2 | TCONS_00036070 | XLOC_032457 | 21989653 | 21989860 | + | 1 | OS02G0573400 | CUFF.5103 | OS02T05734(x | TSS3438 | 0         |           |
| chr2 | TCONS_00036106 | XLOC_032494 | 22300767 | 22300970 | + | 1 | OS02G0579600 | CUFF.5112 | OS02T05796(i | TSS3442 | 7.296E-43 |           |
| chr2 | TCONS_00036128 | XLOC_032513 | 22461577 | 22461780 | + | 1 | OS02G0582400 | CUFF.6633 | OS02T05824(i | TSS3445 | 6.152E-71 |           |
| chr2 | TCONS_00036139 | XLOC_032524 | 22545311 | 22545597 | + | 1 | NA           | CUFF.5124 | NA           | u       | TSS3446   | 1.503E-65 |
| chr2 | TCONS_00043320 | XLOC_032524 | 22545551 | 22545872 | + | 1 | NA           | CUFF.6634 | NA           | u       | TSS3446   | 8.724E-37 |
| chr2 | TCONS_00036141 | XLOC_032526 | 22550446 | 22550936 | + | 1 | OS02G0584700 | CUFF.5129 | OS02T05847(x | TSS3446 | 9.705E-78 |           |
| chr2 | TCONS_00043321 | XLOC_032527 | 22551315 | 22551662 | + | 1 | OS02G0584700 | CUFF.6638 | OS02T05847(x | TSS3446 | 1.775E-08 |           |
| chr2 | TCONS_00036143 | XLOC_032529 | 22560858 | 22561069 | + | 1 | NA           | CUFF.5126 | NA           | u       | TSS3446   | 7.263E-88 |
| chr2 | TCONS_00036148 | XLOC_032534 | 22593091 | 22593382 | + | 1 | NCRNA_1219   | CUFF.5128 | NCRNA_121(x  | TSS3447 | 4.159E-06 |           |
| chr2 | TCONS_00043323 | XLOC_032559 | 22824312 | 22824527 | + | 1 | NEK6         | CUFF.6648 | OS02T05908(x | TSS3449 | 5.01E-43  |           |
| chr2 | TCONS_00036229 | XLOC_032601 | 23121091 | 23121411 | + | 1 | OS02G0595900 | CUFF.5155 | OS02T05959(x | TSS3454 | 4.574E-52 |           |
| chr2 | TCONS_00043329 | XLOC_032610 | 23185828 | 23186040 | + | 1 | OS02G0597000 | CUFF.6665 | OS02T05970(i | TSS3455 | 9.541E-18 |           |
| chr2 | TCONS_00043331 | XLOC_032640 | 23515154 | 23515787 | + | 1 | OS02G0601100 | CUFF.6679 | OS02T06011(x | TSS3458 | 1.083E-27 |           |
| chr2 | TCONS_00043340 | XLOC_032683 | 23752636 | 23752911 | + | 1 | NA           | CUFF.6703 | NA           | u       | TSS3463   | 1.758E-06 |
| chr2 | TCONS_00043342 | XLOC_032699 | 23900893 | 23901306 | + | 1 | OS02G0609000 | CUFF.6716 | OS02T06090(x | TSS3464 | 2.638E-18 |           |
| chr2 | TCONS_00036328 | XLOC_032703 | 23926206 | 23926437 | + | 1 | NA           | CUFF.5199 | NA           | u       | TSS3465   | 4.746E-28 |
| chr2 | TCONS_00036330 | XLOC_032706 | 23938189 | 23938396 | + | 1 | NA           | CUFF.5200 | NA           | u       | TSS3465   | 2.182E-71 |

|      |                |             |          |          |   |   |              |           |              |         |           |           |
|------|----------------|-------------|----------|----------|---|---|--------------|-----------|--------------|---------|-----------|-----------|
| chr2 | TCONS_00043349 | XLOC_032742 | 24165693 | 24165905 | + | 1 | OS02G0613100 | CUFF.6738 | OS02T06131(x | TSS3469 | 1.307E-09 |           |
| chr2 | TCONS_00036366 | XLOC_032745 | 24181262 | 24181768 | + | 1 | OS02G0613400 | CUFF.5212 | OS02T06134(x | TSS3469 | 4.272E-07 |           |
| chr2 | TCONS_00043351 | XLOC_032745 | 24181147 | 24181600 | + | 1 | OS02G0613400 | CUFF.6739 | OS02T06134(x | TSS3469 | 0.073626  |           |
| chr2 | TCONS_00043353 | XLOC_032748 | 24185533 | 24185867 | + | 1 | NA           | CUFF.6732 | NA           | u       | TSS3470   | 1.758E-06 |
| chr2 | TCONS_00043356 | XLOC_032778 | 24489588 | 24489888 | + | 1 | OS02G0617300 | CUFF.6759 | OS02T06173(i | TSS3473 | 2.577E-56 |           |
| chr2 | TCONS_00043357 | XLOC_032779 | 24498703 | 24498936 | + | 1 | OS02G0617300 | CUFF.6762 | OS02T06173(i | TSS3473 | 2.576E-38 |           |
| chr2 | TCONS_00043360 | XLOC_032787 | 24536514 | 24536853 | + | 1 | NA           | CUFF.6746 | NA           | u       | TSS3474   | 4.766E-28 |
| chr2 | TCONS_00043363 | XLOC_032825 | 24778917 | 24779288 | + | 1 | OS02G0622300 | CUFF.6768 | OS02T06223(x | TSS3478 | 8.061E-36 |           |
| chr2 | TCONS_00036489 | XLOC_032871 | 25274947 | 25275167 | + | 1 | NA           | CUFF.5240 | NA           | u       | TSS3483   | 9.037E-25 |
| chr2 | TCONS_00043369 | XLOC_032878 | 25280961 | 25281539 | + | 1 | NA           | CUFF.6789 | NA           | u       | TSS3483   | 2.744E-28 |
| chr2 | TCONS_00036527 | XLOC_032908 | 25513175 | 25513378 | + | 1 | OS02G0636300 | CUFF.5260 | OS02T06363(i | TSS3487 | 1.237E-35 |           |
| chr2 | TCONS_00043371 | XLOC_032919 | 25584484 | 25584691 | + | 1 | OS02G0638200 | CUFF.6806 | OS02T06382(x | TSS3488 | 4.877E-38 |           |
| chr2 | TCONS_00043373 | XLOC_032988 | 26251079 | 26251343 | + | 1 | OS02G0651300 | CUFF.6823 | OS02T06513(i | TSS3495 | 9.09E-07  |           |
| chr2 | TCONS_00043375 | XLOC_032998 | 26345244 | 26345462 | + | 1 | NA           | CUFF.6825 | NA           | u       | TSS3497   | 4.257E-36 |
| chr2 | TCONS_00043376 | XLOC_033005 | 26399446 | 26399711 | + | 1 | OS02G0654400 | CUFF.6828 | OS02T06544(i | TSS3498 | 1.339E-23 |           |
| chr2 | TCONS_00036651 | XLOC_033009 | 26421067 | 26421458 | + | 1 | NA           | CUFF.5280 | NA           | u       | TSS3498   | 2.649E-46 |
| chr2 | TCONS_00036657 | XLOC_033018 | 26510005 | 26510223 | + | 1 | OS02G0656200 | CUFF.5288 | OS02T06562(x | TSS3499 | 1.463E-23 |           |
| chr2 | TCONS_00036677 | XLOC_033039 | 26666331 | 26666536 | + | 1 | OS02G0658900 | CUFF.5294 | OS02T06589(i | TSS3501 | 0         |           |
| chr2 | TCONS_00036690 | XLOC_033053 | 26770141 | 26770928 | + | 1 | TPP1         | CUFF.5304 | OS02T06611(x | TSS3503 | 4.372E-42 |           |
| chr2 | TCONS_00036691 | XLOC_033054 | 26771236 | 26771441 | + | 1 | TPP1         | CUFF.5305 | OS02T06611(i | TSS3503 | 7.467E-30 |           |
| chr2 | TCONS_00043384 | XLOC_033080 | 26986128 | 26986349 | + | 1 | OS02G0664700 | CUFF.6871 | OS02T06647(i | TSS3506 | 5.183E-48 |           |
| chr2 | TCONS_00043388 | XLOC_033088 | 27030884 | 27031089 | + | 1 | OS02G0665600 | CUFF.6884 | OS02T06656(x | TSS3507 | 5.443E-25 |           |
| chr2 | TCONS_00043390 | XLOC_033092 | 27055810 | 27056017 | + | 1 | OS02G0666300 | CUFF.6903 | OS02T06663(i | TSS3507 | 1.063E-19 |           |
| chr2 | TCONS_00036740 | XLOC_033098 | 27086707 | 27086917 | + | 1 | NA           | CUFF.5310 | NA           | u       | TSS3508   | 0         |
| chr2 | TCONS_00043393 | XLOC_033121 | 27279165 | 27279402 | + | 1 | OS02G0671400 | CUFF.6902 | OS02T06714(x | TSS3510 | 0.0003675 |           |
| chr2 | TCONS_00036827 | XLOC_033182 | 27806257 | 27806670 | + | 1 | NA           | CUFF.5338 | NA           | u       | TSS3517   | 0         |
| chr2 | TCONS_00043397 | XLOC_033189 | 27852896 | 27853155 | + | 1 | NA           | CUFF.6923 | NA           | u       | TSS3517   | 7.393E-44 |
| chr2 | TCONS_00036853 | XLOC_033209 | 28015517 | 28015898 | + | 1 | OS02G0684800 | CUFF.5351 | OS02T06848(i | TSS3519 | 3.29E-14  |           |
| chr2 | TCONS_00043401 | XLOC_033214 | 28080652 | 28080909 | + | 1 | OS02G0685600 | CUFF.6933 | OS02T06856(i | TSS3520 | 1.815E-17 |           |
| chr2 | TCONS_00036868 | XLOC_033224 | 28161509 | 28161825 | + | 1 | OS02G0687500 | CUFF.5370 | OS02T06875(x | TSS3521 | 3.556E-64 |           |
| chr2 | TCONS_00036887 | XLOC_033239 | 28285304 | 28285524 | + | 1 | NA           | CUFF.5362 | NA           | u       | TSS3522   | 2.58E-41  |
| chr2 | TCONS_00036889 | XLOC_033241 | 28300467 | 28301137 | + | 1 | NA           | CUFF.5366 | NA           | u       | TSS3523   | 0.0023811 |
| chr2 | TCONS_00043403 | XLOC_033241 | 28300002 | 28300883 | + | 1 | NA           | CUFF.6948 | NA           | u       | TSS3523   | 1.688E-36 |
| chr2 | TCONS_00043406 | XLOC_033243 | 28302926 | 28303173 | + | 1 | NA           | CUFF.6941 | NA           | u       | TSS3523   | 1.335E-33 |
| chr2 | TCONS_00043407 | XLOC_033244 | 28303474 | 28303680 | + | 1 | NA           | CUFF.6942 | NA           | u       | TSS3523   | 2.216E-26 |

|      |                |             |          |          |   |   |              |           |              |   |         |           |
|------|----------------|-------------|----------|----------|---|---|--------------|-----------|--------------|---|---------|-----------|
| chr2 | TCONS_00043410 | XLOC_033248 | 28305843 | 28306232 | + | 1 | NA           | CUFF.6951 | NA           | u | TSS3524 | 1.959E-24 |
| chr2 | TCONS_00043414 | XLOC_033270 | 28480652 | 28480913 | + | 1 | OS02G0693500 | CUFF.6963 | OS02T06935(i |   | TSS3526 | 2.469E-51 |
| chr2 | TCONS_00043416 | XLOC_033274 | 28519716 | 28520029 | + | 1 | OS02G0694201 | CUFF.6976 | OS02T06942(i |   | TSS3526 | 3.839E-19 |
| chr2 | TCONS_00036912 | XLOC_033275 | 28520308 | 28520347 | + | 1 | OS02G0694201 | CUFF.6975 | OS02T06942(x |   | TSS3526 | 4.203E-26 |
| chr2 | TCONS_00043418 | XLOC_033292 | 28627309 | 28627990 | + | 1 | NA           | CUFF.6968 | NA           | u | TSS3528 | 1.517E-41 |
| chr2 | TCONS_00043420 | XLOC_033294 | 28628485 | 28629587 | + | 1 | NA           | CUFF.6971 | NA           | u | TSS3529 | 0.0002157 |
| chr2 | TCONS_00043425 | XLOC_033356 | 29062072 | 29062516 | + | 1 | OS02G0704300 | CUFF.6998 | OS02T07043(x |   | TSS3535 | 9.91E-43  |
| chr2 | TCONS_00043426 | XLOC_033357 | 29063571 | 29063806 | + | 1 | NA           | CUFF.6997 | NA           | u | TSS3535 | 1.268E-85 |
| chr2 | TCONS_00037011 | XLOC_033370 | 29140245 | 29141072 | + | 1 | OS02G0705600 | CUFF.5431 | OS02T07056(i |   | TSS3537 | 8.968E-51 |
| chr2 | TCONS_00043427 | XLOC_033377 | 29224619 | 29225242 | + | 1 | OS02G0706900 | CUFF.7007 | OS02T07069(x |   | TSS3538 | 1.063E-19 |
| chr2 | TCONS_00043438 | XLOC_033420 | 29500957 | 29501243 | + | 1 | NA           | CUFF.7030 | NA           | u | TSS3542 | 1.238E-82 |
| chr2 | TCONS_00043439 | XLOC_033422 | 29504418 | 29504650 | + | 1 | OS02G0712500 | CUFF.7038 | OS02T07125(x |   | TSS3542 | 8.155E-21 |
| chr2 | TCONS_00037062 | XLOC_033425 | 29521015 | 29521431 | + | 1 | OS02G0712700 | CUFF.5449 | OS02T07127(i |   | TSS3543 | 3.808E-10 |
| chr2 | TCONS_00037063 | XLOC_033426 | 29521591 | 29521796 | + | 1 | OS02G0712700 | CUFF.5450 | OS02T07127(i |   | TSS3543 | 0         |
| chr2 | TCONS_00037066 | XLOC_033429 | 29567181 | 29567406 | + | 1 | NA           | CUFF.5437 | NA           | u | TSS3543 | 5.553E-31 |
| chr2 | TCONS_00037067 | XLOC_033430 | 29567504 | 29567805 | + | 1 | NA           | CUFF.5439 | NA           | u | TSS3543 | 2.957E-61 |
| chr2 | TCONS_00037068 | XLOC_033431 | 29568885 | 29569093 | + | 1 | NA           | CUFF.5438 | NA           | u | TSS3543 | 3.336E-14 |
| chr2 | TCONS_00037069 | XLOC_033432 | 29571166 | 29571385 | + | 1 | NA           | CUFF.5440 | NA           | u | TSS3543 | 2.998E-39 |
| chr2 | TCONS_00037070 | XLOC_033433 | 29573482 | 29573895 | + | 1 | OS02G0713700 | CUFF.5442 | OS02T07137(x |   | TSS3544 | 8.261E-17 |
| chr2 | TCONS_00037139 | XLOC_033496 | 29948169 | 29948581 | + | 1 | OS02G0721700 | CUFF.5466 | OS02T07217(i |   | TSS3550 | 1.484E-54 |
| chr2 | TCONS_00037144 | XLOC_033500 | 30001604 | 30001820 | + | 1 | OS02G0722500 | CUFF.5470 | OS02T07225(i |   | TSS3551 | 4.606E-19 |
| chr2 | TCONS_00043445 | XLOC_033507 | 30024861 | 30025064 | + | 1 | OS02G0722800 | CUFF.7068 | OS02T07228(i |   | TSS3551 | 2.943E-20 |
| chr2 | TCONS_00043447 | XLOC_033526 | 30150093 | 30150294 | + | 1 | OS02G0725300 | CUFF.7070 | OS02T07253(i |   | TSS3553 | 6.57E-17  |
| chr2 | TCONS_00043449 | XLOC_033556 | 30303627 | 30303869 | + | 1 | OS02G0728100 | CUFF.7078 | OS02T07281(i |   | TSS3557 | 1.326E-28 |
| chr2 | TCONS_00043452 | XLOC_033580 | 30463724 | 30464128 | + | 1 | OS02G0731300 | CUFF.7084 | OS02T07313(x |   | TSS3559 | 1.043E-12 |
| chr2 | TCONS_00037291 | XLOC_033642 | 30956064 | 30956304 | + | 1 | NA           | CUFF.5504 | NA           | u | TSS3566 | 7.632E-32 |
| chr2 | TCONS_00037294 | XLOC_033645 | 30980692 | 30980996 | + | 1 | OS02G0740700 | CUFF.5514 | OS02T07407(x |   | TSS3566 | 0         |
| chr2 | TCONS_00043460 | XLOC_033659 | 31021400 | 31021807 | + | 1 | NA           | CUFF.7109 | NA           | u | TSS3567 | 9.158E-23 |
| chr2 | TCONS_00043463 | XLOC_033664 | 31031948 | 31032156 | + | 1 | OS02G0741500 | CUFF.7115 | OS02T07415(i |   | TSS3568 | 9.234E-38 |
| chr2 | TCONS_00043471 | XLOC_033685 | 31144952 | 31145358 | + | 1 | OS02G0743200 | CUFF.7124 | OS02T07432(x |   | TSS3571 | 6.57E-17  |
| chr2 | TCONS_00043474 | XLOC_033726 | 31436496 | 31436970 | + | 1 | OS02G0748100 | CUFF.7140 | OS02T07481(i |   | TSS3575 | 6.57E-17  |
| chr2 | TCONS_00037376 | XLOC_033728 | 31443917 | 31444123 | + | 1 | NA           | CUFF.5530 | NA           | u | TSS3575 | 2.724E-85 |
| chr2 | TCONS_00037387 | XLOC_033740 | 31511674 | 31511891 | + | 1 | OS02G0749500 | CUFF.5541 | OS02T07495(i |   | TSS3577 | 0         |
| chr2 | TCONS_00037427 | XLOC_033783 | 31760956 | 31761381 | + | 1 | NA           | CUFF.5546 | NA           | u | TSS3581 | 1.07E-22  |
| chr2 | TCONS_00043489 | XLOC_033798 | 31919840 | 31920392 | + | 1 | OS02G0757900 | CUFF.7174 | OS02T07579(x |   | TSS3583 | 8.154E-21 |

|      |                |             |          |          |   |   |              |                        |         |           |
|------|----------------|-------------|----------|----------|---|---|--------------|------------------------|---------|-----------|
| chr2 | TCONS_00037472 | XLOC_033820 | 32077711 | 32077920 | + | 1 | OS02G0761600 | CUFF.5566 OS02T07616(i | TSS3586 | 0         |
| chr2 | TCONS_00043491 | XLOC_033822 | 32101640 | 32101842 | + | 1 | NCS6         | CUFF.7194 OS02T07623(x | TSS3586 | 2.869E-25 |
| chr2 | TCONS_00043493 | XLOC_033827 | 32149847 | 32150239 | + | 1 | NA           | CUFF.7190 NA u         | TSS3586 | 4.203E-26 |
| chr2 | TCONS_00037485 | XLOC_033837 | 32203454 | 32203688 | + | 1 | NA           | CUFF.5568 NA u         | TSS3587 | 1.238E-25 |
| chr2 | TCONS_00037491 | XLOC_033843 | 32277717 | 32278106 | + | 1 | OS02G0766700 | CUFF.5575 OS02T07667(i | TSS3588 | 5.289E-42 |
| chr2 | TCONS_00037504 | XLOC_033857 | 32371867 | 32372069 | + | 1 | OS02G0768400 | CUFF.5582 OS02T07684(i | TSS3589 | 6.775E-44 |
| chr2 | TCONS_00037524 | XLOC_033876 | 32536958 | 32537185 | + | 1 | NA           | CUFF.5586 NA u         | TSS3591 | 2.943E-29 |
| chr2 | TCONS_00037535 | XLOC_033887 | 32595309 | 32595836 | + | 1 | OS02G0772200 | CUFF.7213 OS02T07722(x | TSS3592 | 3.045E-19 |
| chr2 | TCONS_00043502 | XLOC_033907 | 32686174 | 32686399 | + | 1 | OS02G0774200 | CUFF.7218 OS02T07742(x | TSS3594 | 1.179E-54 |
| chr2 | TCONS_00043503 | XLOC_033909 | 32692611 | 32692811 | + | 1 | OS02G0774300 | CUFF.7231 OS02T07743(i | TSS3595 | 6.222E-68 |
| chr2 | TCONS_00037563 | XLOC_033915 | 32739334 | 32739545 | + | 1 | OS02G0775400 | CUFF.5599 OS02T07754(i | TSS3595 | 4.716E-77 |
| chr2 | TCONS_00043507 | XLOC_033963 | 33126495 | 33126698 | + | 1 | OS02G0781700 | CUFF.7252 OS02T07817(i | TSS3601 | 6.161E-27 |
| chr2 | TCONS_00043510 | XLOC_033976 | 33172495 | 33172772 | + | 1 | OS02G0782300 | CUFF.7263 OS02T07823(i | TSS3602 | 7.297E-19 |
| chr2 | TCONS_00037629 | XLOC_033977 | 33174432 | 33174686 | + | 1 | OS02G0782300 | CUFF.5627 OS02T07823(i | TSS3602 | 9.09E-07  |
| chr2 | TCONS_00037636 | XLOC_033986 | 33216212 | 33216430 | + | 1 | NA           | CUFF.5621 NA u         | TSS3603 | 3.488E-37 |
| chr2 | TCONS_00043520 | XLOC_034002 | 33316952 | 33317297 | + | 1 | NCRNA_9665   | CUFF.7269 NCRNA_966:x  | TSS3605 | 2.165E-14 |
| chr2 | TCONS_00037674 | XLOC_034023 | 33477040 | 33477250 | + | 1 | OS02G0787800 | CUFF.5646 OS02T07878(x | TSS3607 | 0.089252  |
| chr2 | TCONS_00037675 | XLOC_034024 | 33478058 | 33478266 | + | 1 | OS02G0787800 | CUFF.5653 OS02T07878(x | TSS3607 | 4.697E-49 |
| chr2 | TCONS_00043522 | XLOC_034031 | 33503052 | 33503469 | + | 1 | OS02G0788600 | CUFF.7283 OS02T07886(i | TSS3608 | 3.047E-45 |
| chr2 | TCONS_00037686 | XLOC_034036 | 33540845 | 33541071 | + | 1 | NA           | CUFF.5638 NA u         | TSS3609 | 1.168E-41 |
| chr2 | TCONS_00037699 | XLOC_034047 | 33641664 | 33641865 | + | 1 | NA           | CUFF.5644 NA u         | TSS3610 | 6.356E-67 |
| chr2 | TCONS_00043525 | XLOC_034071 | 33781712 | 33782355 | + | 1 | NA           | CUFF.7296 NA u         | TSS3613 | 7.338E-08 |
| chr2 | TCONS_00037743 | XLOC_034087 | 33861844 | 33862045 | + | 1 | OS02G0796500 | CUFF.5669 OS02T07965(i | TSS3614 | 0         |
| chr2 | TCONS_00037746 | XLOC_034090 | 33888786 | 33889026 | + | 1 | NA           | CUFF.5661 NA u         | TSS3615 | 0         |
| chr2 | TCONS_00043530 | XLOC_034092 | 33892122 | 33892393 | + | 1 | NA           | CUFF.7302 NA u         | TSS3615 | 2.064E-44 |
| chr2 | TCONS_00043531 | XLOC_034093 | 33893445 | 33893678 | + | 1 | NA           | CUFF.7303 NA u         | TSS3615 | 2.439E-07 |
| chr2 | TCONS_00043532 | XLOC_034096 | 33920125 | 33920325 | + | 1 | OS02G0797100 | CUFF.7307 OS02T07971(x | TSS3615 | 3.301E-22 |
| chr2 | TCONS_00037802 | XLOC_034145 | 34223661 | 34223930 | + | 1 | OS02G0802700 | CUFF.5681 OS02T08027(i | TSS3620 | 0.0007261 |
| chr2 | TCONS_00037803 | XLOC_034147 | 34230206 | 34230421 | + | 1 | NA           | CUFF.5680 NA u         | TSS3620 | 0         |
| chr2 | TCONS_00043536 | XLOC_034171 | 34378300 | 34378505 | + | 1 | OS02G0805800 | CUFF.7332 OS02T08058(x | TSS3623 | 5.596E-40 |
| chr2 | TCONS_00037865 | XLOC_034204 | 34621560 | 34621809 | + | 1 | OS02G0810100 | CUFF.5708 OS02T08101(i | TSS3627 | 4.446E-08 |
| chr2 | TCONS_00043541 | XLOC_034213 | 34703360 | 34703561 | + | 1 | NA           | CUFF.7357 NA u         | TSS3628 | 1.508E-30 |
| chr2 | TCONS_00037877 | XLOC_034216 | 34738876 | 34739082 | + | 1 | NA           | CUFF.5707 NA u         | TSS3628 | 1.986E-34 |
| chr2 | TCONS_00043546 | XLOC_034249 | 34905008 | 34905446 | + | 1 | NA           | CUFF.7367 NA u         | TSS3631 | 4.766E-28 |
| chr2 | TCONS_00037930 | XLOC_034270 | 35006523 | 35006729 | + | 1 | OS02G0816600 | CUFF.5720 OS02T08166(x | TSS3634 | 0.0077427 |



|      |                |             |          |          |   |   |              |           |              |   |         |           |
|------|----------------|-------------|----------|----------|---|---|--------------|-----------|--------------|---|---------|-----------|
| chr2 | TCONS_00037931 | XLOC_034272 | 35007559 | 35007836 | + | 1 | NA           | CUFF.5719 | NA           | u | TSS3634 | 0.018843  |
| chr2 | TCONS_00043551 | XLOC_034274 | 35008568 | 35008913 | + | 1 | NA           | CUFF.7373 | NA           | u | TSS3634 | 2.439E-07 |
| chr2 | TCONS_00037941 | XLOC_034282 | 35077607 | 35077813 | + | 1 | NA           | CUFF.5724 | NA           | u | TSS3635 | 0         |
| chr2 | TCONS_00043553 | XLOC_034306 | 35182588 | 35183026 | + | 1 | OS02G0819500 | CUFF.7401 | OS02T08195(i |   | TSS3638 | 5.961E-15 |
| chr2 | TCONS_00043558 | XLOC_034355 | 35421336 | 35421677 | + | 1 | OS02G0824400 | CUFF.7411 | OS02T08244(x |   | TSS3643 | 2.307E-16 |
| chr2 | TCONS_00043562 | XLOC_034366 | 35462716 | 35462968 | + | 1 | OS02G0825650 | CUFF.7416 | OS02T08256(i |   | TSS3645 | 7.869E-14 |
| chr2 | TCONS_00043563 | XLOC_034368 | 35465960 | 35466198 | + | 1 | OS02G0825650 | CUFF.7422 | OS02T08256(i |   | TSS3645 | 1.037E-34 |
| chr2 | TCONS_00038034 | XLOC_034370 | 35467439 | 35467753 | + | 1 | OS02G0825650 | CUFF.5758 | OS02T08256(i |   | TSS3645 | 2.137E-60 |
| chr2 | TCONS_00043566 | XLOC_034372 | 35475350 | 35475718 | + | 1 | OS02G0825650 | CUFF.7441 | OS02T08256(i |   | TSS3645 | 1.643E-15 |
| chr2 | TCONS_00038035 | XLOC_034373 | 35475960 | 35476572 | + | 1 | OS02G0825650 | CUFF.5766 | OS02T08256(i |   | TSS3645 | 0.18507   |
| chr2 | TCONS_00038051 | XLOC_034388 | 35576298 | 35576539 | + | 1 | OS02G0827900 | CUFF.5770 | OS02T08279(i |   | TSS3647 | 0.48773   |
| chr2 | TCONS_00038057 | XLOC_034394 | 35607852 | 35608059 | + | 1 | NA           | CUFF.5763 | NA           | u | TSS3647 | 2.953E-34 |
| chr2 | TCONS_00043570 | XLOC_034436 | 35836382 | 35836603 | + | 1 | NA           | CUFF.7449 | NA           | u | TSS3652 | 4.2E-31   |
| chr2 | TCONS_00038115 | XLOC_034446 | 17878    | 18091    | - | 1 | OS02G0100300 | CUFF.4181 | OS02T01003(x |   | TSS3653 | 6.037E-51 |
| chr2 | TCONS_00038148 | XLOC_034477 | 204425   | 204673   | - | 1 | OS02G0104100 | CUFF.5381 | OS02T01041(x |   | TSS3656 | 1.612E-35 |
| chr2 | TCONS_00043575 | XLOC_034496 | 411475   | 413762   | - | 1 | OS02G0106966 | CUFF.5410 | OS02T01069(x |   | TSS3658 | 2.718E-08 |
| chr2 | TCONS_00043576 | XLOC_034497 | 414539   | 414819   | - | 1 | NA           | CUFF.5387 | NA           | u | TSS3659 | 3.56E-10  |
| chr2 | TCONS_00038168 | XLOC_034498 | 415223   | 417038   | - | 1 | OS02G0107000 | CUFF.4204 | OS02T01070(x |   | TSS3659 | 0.15445   |
| chr2 | TCONS_00043580 | XLOC_034508 | 485683   | 486088   | - | 1 | NA           | CUFF.5391 | NA           | u | TSS3660 | 4.74E-06  |
| chr2 | TCONS_00043583 | XLOC_034573 | 908402   | 908774   | - | 1 | SPP1         | CUFF.5432 | OS02T01174(x |   | TSS3667 | 2.956E-40 |
| chr2 | TCONS_00043584 | XLOC_034582 | 968461   | 968667   | - | 1 | NA           | CUFF.5433 | NA           | u | TSS3668 | 0         |
| chr2 | TCONS_00043585 | XLOC_034583 | 970929   | 971253   | - | 1 | NA           | CUFF.5430 | NA           | u | TSS3668 | 4.096E-11 |
| chr2 | TCONS_00038258 | XLOC_034584 | 972767   | 972981   | - | 1 | NA           | CUFF.4230 | NA           | u | TSS3668 | 2.756E-62 |
| chr2 | TCONS_00043588 | XLOC_034594 | 992861   | 993109   | - | 1 | OS02G0118850 | CUFF.5447 | OS02T01188(i |   | TSS3669 | 2.332E-59 |
| chr2 | TCONS_00043592 | XLOC_034604 | 1032372  | 1032577  | - | 1 | NA           | CUFF.5442 | NA           | u | TSS3670 | 2.981E-58 |
| chr2 | TCONS_00038273 | XLOC_034605 | 1032801  | 1033008  | - | 1 | NA           | CUFF.4234 | NA           | u | TSS3670 | 7.896E-81 |
| chr2 | TCONS_00038298 | XLOC_034630 | 1138990  | 1139264  | - | 1 | OS02G0121600 | CUFF.4248 | OS02T01216(x |   | TSS3673 | 8.209E-69 |
| chr2 | TCONS_00043596 | XLOC_034630 | 1139055  | 1139344  | - | 1 | OS02G0121600 | CUFF.5455 | OS02T01216(x |   | TSS3673 | 4.051E-56 |
| chr2 | TCONS_00043600 | XLOC_034649 | 1220491  | 1221245  | - | 1 | NA           | CUFF.5457 | NA           | u | TSS3675 | 1.428E-18 |
| chr2 | TCONS_00043603 | XLOC_034665 | 1277406  | 1277865  | - | 1 | NCRNA_37244  | CUFF.5462 | NCRNA_372(x  |   | TSS3677 | 2.128E-08 |
| chr2 | TCONS_00043604 | XLOC_034666 | 1278531  | 1278736  | - | 1 | NA           | CUFF.5458 | NA           | u | TSS3677 | 5.592E-20 |
| chr2 | TCONS_00038334 | XLOC_034668 | 1279653  | 1280035  | - | 1 | NA           | CUFF.4258 | NA           | u | TSS3677 | 0         |
| chr2 | TCONS_00043607 | XLOC_034669 | 1282577  | 1282830  | - | 1 | NA           | CUFF.5459 | NA           | u | TSS3677 | 3.839E-19 |
| chr2 | TCONS_00043608 | XLOC_034674 | 1318561  | 1318906  | - | 1 | OS02G0125200 | CUFF.5468 | OS02T01252(x |   | TSS3678 | 2.416E-24 |
| chr2 | TCONS_00043609 | XLOC_034676 | 1327605  | 1327880  | - | 1 | BII          | CUFF.5482 | OS02T01253(x |   | TSS3678 | 2.236E-39 |

|      |                |             |         |         |   |   |              |                        |         |           |
|------|----------------|-------------|---------|---------|---|---|--------------|------------------------|---------|-----------|
| chr2 | TCONS_00038342 | XLOC_034677 | 1328492 | 1328995 | - | 1 | BI1          | CUFF.4269 OS02T01253(x | TSS3678 | 1.168E-41 |
| chr2 | TCONS_00043622 | XLOC_034755 | 1875461 | 1875661 | - | 1 | NA           | CUFF.5501 NA u         | TSS3687 | 1.549E-20 |
| chr2 | TCONS_00038436 | XLOC_034767 | 1971070 | 1971392 | - | 1 | OS02G0137100 | CUFF.4297 OS02T01371(x | TSS3688 | 1.496E-88 |
| chr2 | TCONS_00043631 | XLOC_034774 | 1989116 | 1989667 | - | 1 | NA           | CUFF.5516 NA u         | TSS3689 | 1.931E-06 |
| chr2 | TCONS_00043632 | XLOC_034774 | 1989945 | 1990712 | - | 1 | NA           | CUFF.5517 NA u         | TSS3689 | 0.2531    |
| chr2 | TCONS_00043633 | XLOC_034775 | 1991337 | 1991635 | - | 1 | NA           | CUFF.5515 NA u         | TSS3689 | 9.541E-18 |
| chr2 | TCONS_00043640 | XLOC_034837 | 2552051 | 2552253 | - | 1 | OS02G0146500 | CUFF.5605 OS02T01465(i | TSS3696 | 6.268E-22 |
| chr2 | TCONS_00043643 | XLOC_034853 | 2651103 | 2651722 | - | 1 | NA           | CUFF.5542 NA u         | TSS3697 | 7.874E-35 |
| chr2 | TCONS_00043646 | XLOC_034856 | 2655786 | 2656593 | - | 1 | NA           | CUFF.5545 NA u         | TSS3698 | 8.982E-05 |
| chr2 | TCONS_00038528 | XLOC_034858 | 2665016 | 2665228 | - | 1 | OS02G0148500 | CUFF.4321 OS02T01485(x | TSS3698 | 1.741E-80 |
| chr2 | TCONS_00038541 | XLOC_034871 | 2744908 | 2745160 | - | 1 | OS02G0149800 | CUFF.4331 OS02T01498(i | TSS3700 | 9.351E-45 |
| chr2 | TCONS_00043649 | XLOC_034871 | 2744584 | 2745056 | - | 1 | OS02G0149800 | CUFF.5559 OS02T01498(i | TSS3700 | 7.002E-26 |
| chr2 | TCONS_00038549 | XLOC_034879 | 2785983 | 2786202 | - | 1 | NA           | CUFF.4324 NA u         | TSS3701 | 5.848E-46 |
| chr2 | TCONS_00038550 | XLOC_034880 | 2786401 | 2786662 | - | 1 | NA           | CUFF.4325 NA u         | TSS3701 | 1.155E-86 |
| chr2 | TCONS_00038558 | XLOC_034887 | 2812800 | 2813130 | - | 1 | NA           | CUFF.4327 NA u         | TSS3702 | 1.625E-81 |
| chr2 | TCONS_00043653 | XLOC_034893 | 2842744 | 2842972 | - | 1 | NA           | CUFF.5564 NA u         | TSS3702 | 4.293E-21 |
| chr2 | TCONS_00043662 | XLOC_034975 | 3309376 | 3309754 | - | 1 | NA           | CUFF.5592 NA u         | TSS3711 | 0.04715   |
| chr2 | TCONS_00043666 | XLOC_034980 | 3313472 | 3314036 | - | 1 | NA           | CUFF.5595 NA u         | TSS3712 | 3.868E-30 |
| chr2 | TCONS_00043672 | XLOC_035000 | 3472484 | 3472720 | - | 1 | NA           | CUFF.5632 NA u         | TSS3714 | 2.216E-26 |
| chr2 | TCONS_00043674 | XLOC_035006 | 3504868 | 3505364 | - | 1 | OS02G0165100 | CUFF.5651 OS02T01651(i | TSS3714 | 0.0003675 |
| chr2 | TCONS_00038672 | XLOC_035007 | 3505423 | 3505660 | - | 1 | OS02G0165100 | CUFF.4395 OS02T01651(i | TSS3715 | 8.259E-31 |
| chr2 | TCONS_00038675 | XLOC_035012 | 3549470 | 3549715 | - | 1 | NA           | CUFF.4385 NA u         | TSS3715 | 5.848E-09 |
| chr2 | TCONS_00043678 | XLOC_035015 | 3582292 | 3582492 | - | 1 | NA           | CUFF.5641 NA u         | TSS3715 | 3.796E-39 |
| chr2 | TCONS_00043679 | XLOC_035018 | 3613275 | 3613704 | - | 1 | OS02G0167100 | CUFF.5653 OS02T01671(x | TSS3716 | 3.295E-55 |
| chr2 | TCONS_00043680 | XLOC_035036 | 3715670 | 3716107 | - | 1 | HEMC         | CUFF.5656 OS02T01688(i | TSS3718 | 1.549E-20 |
| chr2 | TCONS_00043681 | XLOC_035041 | 3727993 | 3728544 | - | 1 | OS02G0169300 | CUFF.5683 OS02T01693(x | TSS3718 | 0         |
| chr2 | TCONS_00043690 | XLOC_035127 | 4281446 | 4281709 | - | 1 | 4CL3         | CUFF.5740 OS02T01776(x | TSS3727 | 4.629E-64 |
| chr2 | TCONS_00038790 | XLOC_035129 | 4284536 | 4284850 | - | 1 | 4CL3         | CUFF.4505 OS02T01776(x | TSS3728 | 5.281E-64 |
| chr2 | TCONS_00043691 | XLOC_035135 | 4302850 | 4303216 | - | 1 | NA           | CUFF.5687 NA u         | TSS3728 | 6.821E-10 |
| chr2 | TCONS_00038815 | XLOC_035154 | 4408375 | 4408622 | - | 1 | OS02G0179300 | CUFF.4429 OS02T01793(i | TSS3730 | 6.723E-15 |
| chr2 | TCONS_00043696 | XLOC_035166 | 4463473 | 4463685 | - | 1 | OS02G0180200 | CUFF.5698 OS02T01802(x | TSS3731 | 2.056E-18 |
| chr2 | TCONS_00038829 | XLOC_035171 | 4498817 | 4499021 | - | 1 | OS02G0180700 | CUFF.4439 OS02T01807(i | TSS3732 | 0         |
| chr2 | TCONS_00038840 | XLOC_035181 | 4543598 | 4544005 | - | 1 | NA           | CUFF.4435 NA u         | TSS3733 | 1.023E-18 |
| chr2 | TCONS_00038855 | XLOC_035196 | 4617746 | 4617977 | - | 1 | OS02G0182700 | CUFF.4444 OS02T01827(i | TSS3734 | 0         |
| chr2 | TCONS_00038856 | XLOC_035197 | 4619968 | 4620384 | - | 1 | OS02G0182700 | CUFF.4446 OS02T01827(i | TSS3735 | 0         |

|      |                |             |         |         |   |   |              |           |              |         |           |           |
|------|----------------|-------------|---------|---------|---|---|--------------|-----------|--------------|---------|-----------|-----------|
| chr2 | TCONS_00038876 | XLOC_035216 | 4741144 | 4741362 | - | 1 | OS02G0184900 | CUFF.4467 | OS02T01849(x | TSS3737 | 3.901E-09 |           |
| chr2 | TCONS_00038885 | XLOC_035227 | 4811155 | 4811374 | - | 1 | OS02G0186500 | CUFF.4460 | OS02T01865(i | TSS3738 | 1.495E-88 |           |
| chr2 | TCONS_00038887 | XLOC_035229 | 4818117 | 4818334 | - | 1 | NA           | CUFF.4455 | NA           | u       | TSS3738   | 5.588E-26 |
| chr2 | TCONS_00043703 | XLOC_035235 | 4834834 | 4835205 | - | 1 | NCRNA_49892  | CUFF.5733 | NCRNA_498(x  | TSS3738 | 2.38E-16  |           |
| chr2 | TCONS_00043709 | XLOC_035278 | 5062944 | 5063156 | - | 1 | OS02G0191500 | CUFF.5750 | OS02T01915(x | TSS3743 | 4.53E-16  |           |
| chr2 | TCONS_00038949 | XLOC_035293 | 5133221 | 5133424 | - | 1 | NA           | CUFF.4478 | NA           | u       | TSS3745   | 0         |
| chr2 | TCONS_00038950 | XLOC_035294 | 5136888 | 5137117 | - | 1 | NA           | CUFF.4476 | NA           | u       | TSS3745   | 1.672E-17 |
| chr2 | TCONS_00043710 | XLOC_035295 | 5138032 | 5138235 | - | 1 | NA           | CUFF.5754 | NA           | u       | TSS3745   | 3.811E-57 |
| chr2 | TCONS_00038951 | XLOC_035296 | 5141631 | 5142669 | - | 1 | NA           | CUFF.4481 | NA           | u       | TSS3745   | 1.677E-85 |
| chr2 | TCONS_00038963 | XLOC_035309 | 5218000 | 5218210 | - | 1 | OS02G0193732 | CUFF.4483 | OS02T01937(x | TSS3747 | 4.368E-50 |           |
| chr2 | TCONS_00043715 | XLOC_035315 | 5252150 | 5252447 | - | 1 | OS02G0194200 | CUFF.5786 | OS02T01942(i | TSS3747 | 5.592E-20 |           |
| chr2 | TCONS_00038977 | XLOC_035323 | 5315417 | 5315691 | - | 1 | NA           | CUFF.4501 | NA           | u       | TSS3748   | 3.176E-77 |
| chr2 | TCONS_00043718 | XLOC_035325 | 5319313 | 5319549 | - | 1 | OS02G0194900 | CUFF.5781 | OS02T01949(i | TSS3748 | 5.476E-35 |           |
| chr2 | TCONS_00038979 | XLOC_035326 | 5323712 | 5323959 | - | 1 | OS02G0194900 | CUFF.4506 | OS02T01949(x | TSS3748 | 3.174E-60 |           |
| chr2 | TCONS_00039041 | XLOC_035377 | 5605759 | 5605970 | - | 1 | OS02G0200000 | CUFF.4519 | OS02T02000(i | TSS3754 | 1.658E-58 |           |
| chr2 | TCONS_00039061 | XLOC_035394 | 5707743 | 5708006 | - | 1 | SPX2         | CUFF.4525 | OS02T02022(x | TSS3756 | 0         |           |
| chr2 | TCONS_00043724 | XLOC_035408 | 5778682 | 5778882 | - | 1 | NA           | CUFF.5814 | NA           | u       | TSS3757   | 3.258E-32 |
| chr2 | TCONS_00039089 | XLOC_035424 | 5832488 | 5832738 | - | 1 | OS02G0204300 | CUFF.4535 | OS02T02043(x | TSS3759 | 4.565E-65 |           |
| chr2 | TCONS_00043734 | XLOC_035459 | 6083649 | 6084170 | - | 1 | OS02G0208600 | CUFF.5847 | OS02T02086(i | TSS3763 | 3.802E-12 |           |
| chr2 | TCONS_00043737 | XLOC_035478 | 6207882 | 6208134 | - | 1 | OS02G0211150 | CUFF.5860 | OS02T02111(i | TSS3765 | 3.811E-57 |           |
| chr2 | TCONS_00039145 | XLOC_035481 | 6224972 | 6225193 | - | 1 | OS02G0211350 | CUFF.4555 | OS02T02113(x | TSS3765 | 2.144E-28 |           |
| chr2 | TCONS_00039158 | XLOC_035496 | 6297866 | 6298076 | - | 1 | NA           | CUFF.4553 | NA           | u       | TSS3767   | 0         |
| chr2 | TCONS_00039159 | XLOC_035497 | 6298412 | 6298641 | - | 1 | NA           | CUFF.4551 | NA           | u       | TSS3767   | 1.561E-32 |
| chr2 | TCONS_00043741 | XLOC_035498 | 6301778 | 6301984 | - | 1 | NA           | CUFF.5850 | NA           | u       | TSS3767   | 4.791E-33 |
| chr2 | TCONS_00043750 | XLOC_035534 | 6487996 | 6488284 | - | 1 | NA           | CUFF.5871 | NA           | u       | TSS3771   | 2.638E-18 |
| chr2 | TCONS_00043752 | XLOC_035547 | 6543428 | 6543645 | - | 1 | NA           | CUFF.5882 | NA           | u       | TSS3772   | 8.626E-16 |
| chr2 | TCONS_00039219 | XLOC_035559 | 6590294 | 6590495 | - | 1 | NA           | CUFF.4572 | NA           | u       | TSS3773   | 0         |
| chr2 | TCONS_00039247 | XLOC_035585 | 6792726 | 6792960 | - | 1 | OS02G0221600 | CUFF.4581 | OS02T02216(x | TSS3776 | 3.765E-36 |           |
| chr2 | TCONS_00043756 | XLOC_035606 | 6981164 | 6981393 | - | 1 | NA           | CUFF.5904 | NA           | u       | TSS3778   | 1.748E-37 |
| chr2 | TCONS_00039268 | XLOC_035607 | 6981988 | 6982206 | - | 1 | NA           | CUFF.4585 | NA           | u       | TSS3778   | 2.98E-24  |
| chr2 | TCONS_00039269 | XLOC_035609 | 6982552 | 6983584 | - | 1 | OS02G0224300 | CUFF.4594 | OS02T02243(x | TSS3779 | 1.059E-11 |           |
| chr2 | TCONS_00039270 | XLOC_035610 | 6987490 | 6987730 | - | 1 | OS02G0224400 | CUFF.4589 | OS02T02244(x | TSS3779 | 2.144E-28 |           |
| chr2 | TCONS_00043762 | XLOC_035629 | 7121898 | 7122104 | - | 1 | NA           | CUFF.5914 | NA           | u       | TSS3781   | 1.037E-34 |
| chr2 | TCONS_00043765 | XLOC_035677 | 7502752 | 7503109 | - | 1 | OS02G0232500 | CUFF.5944 | OS02T02325(i | TSS3786 | 7.393E-44 |           |
| chr2 | TCONS_00043766 | XLOC_035692 | 7598027 | 7598346 | - | 1 | OS02G0234200 | CUFF.5948 | OS02T02342(i | TSS3787 | 6.268E-37 |           |

|      |                |             |          |          |   |   |              |                        |   |         |           |
|------|----------------|-------------|----------|----------|---|---|--------------|------------------------|---|---------|-----------|
| chr2 | TCONS_00043767 | XLOC_035693 | 7612587  | 7612853  | - | 1 | NA           | CUFF.5938 NA           | u | TSS3788 | 1.326E-28 |
| chr2 | TCONS_00039353 | XLOC_035694 | 7615622  | 7615834  | - | 1 | NA           | CUFF.4613 NA           | u | TSS3788 | 0         |
| chr2 | TCONS_00039414 | XLOC_035757 | 8311938  | 8312167  | - | 1 | NCRNA_5113   | CUFF.4630 NCRNA_5113   | x | TSS3794 | 3.19E-28  |
| chr2 | TCONS_00039416 | XLOC_035761 | 8314638  | 8314839  | - | 1 | NA           | CUFF.4631 NA           | u | TSS3795 | 0         |
| chr2 | TCONS_00043782 | XLOC_035779 | 8424338  | 8424557  | - | 1 | NA           | CUFF.5979 NA           | u | TSS3797 | 5.979E-50 |
| chr2 | TCONS_00043784 | XLOC_035788 | 8502585  | 8502887  | - | 1 | OS02G0250400 | CUFF.5988 OS02T0250400 | x | TSS3798 | 1.573E-12 |
| chr2 | TCONS_00039441 | XLOC_035789 | 8504995  | 8505209  | - | 1 | NA           | CUFF.4650 NA           | u | TSS3798 | 3.162E-49 |
| chr2 | TCONS_00043785 | XLOC_035792 | 8522070  | 8522292  | - | 1 | OS02G0250700 | CUFF.5996 OS02T0250700 | i | TSS3798 | 0.005791  |
| chr2 | TCONS_00043786 | XLOC_035794 | 8524924  | 8525415  | - | 1 | OS02G0250700 | CUFF.6000 OS02T0250700 | i | TSS3798 | 8.061E-36 |
| chr2 | TCONS_00043791 | XLOC_035857 | 9100643  | 9101014  | - | 1 | NA           | CUFF.6020 NA           | u | TSS3805 | 2.303E-41 |
| chr2 | TCONS_00043793 | XLOC_035859 | 9103069  | 9103342  | - | 1 | NA           | CUFF.6018 NA           | u | TSS3805 | 4.824E-23 |
| chr2 | TCONS_00043794 | XLOC_035860 | 9104013  | 9104316  | - | 1 | NA           | CUFF.6021 NA           | u | TSS3805 | 4.2E-31   |
| chr2 | TCONS_00039509 | XLOC_035864 | 9116636  | 9116864  | - | 1 | UBC5B        | CUFF.4678 OS02T0261100 | x | TSS3806 | 0.075834  |
| chr2 | TCONS_00039514 | XLOC_035868 | 9138926  | 9139178  | - | 1 | NA           | CUFF.4669 NA           | u | TSS3806 | 0.075834  |
| chr2 | TCONS_00039540 | XLOC_035891 | 9448770  | 9449031  | - | 1 | OS02G0265200 | CUFF.4682 OS02T0265200 | x | TSS3808 | 1.469E-71 |
| chr2 | TCONS_00039543 | XLOC_035895 | 9488007  | 9488219  | - | 1 | OS02G0265700 | CUFF.4690 OS02T0265700 | i | TSS3809 | 9.642E-50 |
| chr2 | TCONS_00043800 | XLOC_035901 | 9540751  | 9541047  | - | 1 | OS02G0266900 | CUFF.6050 OS02T0266900 | x | TSS3809 | 8.25E-41  |
| chr2 | TCONS_00043802 | XLOC_035956 | 10052553 | 10053002 | - | 1 | NCRNA_39443  | CUFF.6068 NCRNA_39443  | x | TSS3815 | 2.999E-31 |
| chr2 | TCONS_00039608 | XLOC_035960 | 10085120 | 10085358 | - | 1 | OS02G0275100 | CUFF.4713 OS02T0275100 | i | TSS3816 | 7.74E-10  |
| chr2 | TCONS_00043806 | XLOC_035998 | 10371717 | 10372175 | - | 1 | OS02G0280400 | CUFF.6116 OS02T0280400 | i | TSS3820 | 4.812E-09 |
| chr2 | TCONS_00039655 | XLOC_036009 | 10490737 | 10491347 | - | 1 | NA           | CUFF.4719 NA           | u | TSS3821 | 6.885E-83 |
| chr2 | TCONS_00039662 | XLOC_036017 | 10533740 | 10533950 | - | 1 | NA           | CUFF.4722 NA           | u | TSS3821 | 0         |
| chr2 | TCONS_00039685 | XLOC_036041 | 10746139 | 10746367 | - | 1 | OS02G0285800 | CUFF.4732 OS02T0285800 | i | TSS3824 | 8.942E-30 |
| chr2 | TCONS_00039772 | XLOC_036124 | 11400026 | 11400237 | - | 1 | OS02G0297600 | CUFF.4760 OS02T0297600 | i | TSS3832 | 0         |
| chr2 | TCONS_00039799 | XLOC_036151 | 11669244 | 11669525 | - | 1 | NA           | CUFF.4758 NA           | u | TSS3835 | 1.086E-81 |
| chr2 | TCONS_00043813 | XLOC_036152 | 11669803 | 11670121 | - | 1 | NA           | CUFF.6125 NA           | u | TSS3835 | 9.497E-47 |
| chr2 | TCONS_00039800 | XLOC_036153 | 11670224 | 11670532 | - | 1 | OS02G0301500 | CUFF.4762 OS02T0301500 | x | TSS3835 | 1.463E-23 |
| chr2 | TCONS_00039876 | XLOC_036229 | 12372552 | 12372779 | - | 1 | OS02G0313400 | CUFF.4777 OS02T0313400 | i | TSS3843 | 7.436E-14 |
| chr2 | TCONS_00039877 | XLOC_036230 | 12375243 | 12375450 | - | 1 | NA           | CUFF.4775 NA           | u | TSS3843 | 6.622E-39 |
| chr2 | TCONS_00043818 | XLOC_036234 | 12382987 | 12383382 | - | 1 | OS02G0313500 | CUFF.6167 OS02T0313500 | x | TSS3843 | 4.2E-31   |
| chr2 | TCONS_00039890 | XLOC_036245 | 12433596 | 12433868 | - | 1 | CAX1C        | CUFF.4788 OS02T0314300 | i | TSS3845 | 5.147E-27 |
| chr2 | TCONS_00039913 | XLOC_036264 | 12622637 | 12623104 | - | 1 | OS02G0317700 | CUFF.4794 OS02T0317700 | x | TSS3847 | 4.216E-22 |
| chr2 | TCONS_00043821 | XLOC_036265 | 12623633 | 12623880 | - | 1 | OS02G0317700 | CUFF.6176 OS02T0317700 | x | TSS3847 | 7.959E-31 |
| chr2 | TCONS_00043823 | XLOC_036266 | 12625658 | 12626054 | - | 1 | NA           | CUFF.6164 NA           | u | TSS3847 | 1.19E-21  |
| chr2 | TCONS_00043824 | XLOC_036270 | 12646160 | 12646195 | - | 1 | OS02G0318100 | CUFF.6216 OS02T0318100 | x | TSS3848 | 0         |

|      |                |             |          |          |   |   |              |                        |         |                   |
|------|----------------|-------------|----------|----------|---|---|--------------|------------------------|---------|-------------------|
| chr2 | TCONS_00043825 | XLOC_036270 | 12646249 | 12647011 | - | 1 | OS02G0318100 | CUFF.6216 OS02T03181(x | TSS3848 | 0                 |
| chr2 | TCONS_00043826 | XLOC_036271 | 12647630 | 12647976 | - | 1 | NA           | CUFF.6225 NA           | u       | TSS3848 0         |
| chr2 | TCONS_00043829 | XLOC_036302 | 12991444 | 12991652 | - | 1 | NA           | CUFF.6187 NA           | u       | TSS3851 1.033E-24 |
| chr2 | TCONS_00039953 | XLOC_036305 | 13040343 | 13040705 | - | 1 | NA           | CUFF.4802 NA           | u       | TSS3851 1.25E-62  |
| chr2 | TCONS_00039963 | XLOC_036317 | 13145216 | 13145437 | - | 1 | NA           | CUFF.4806 NA           | u       | TSS3852 0.0077427 |
| chr2 | TCONS_00039965 | XLOC_036319 | 13152271 | 13152505 | - | 1 | NA           | CUFF.4807 NA           | u       | TSS3853 3.336E-14 |
| chr2 | TCONS_00039968 | XLOC_036322 | 13174604 | 13174874 | - | 1 | OS02G0327000 | CUFF.6209 OS02T03270(i | TSS3853 | 5.829E-40         |
| chr2 | TCONS_00043832 | XLOC_036323 | 13174988 | 13175274 | - | 1 | OS02G0327000 | CUFF.6212 OS02T03270(i | TSS3853 | 2.671E-36         |
| chr2 | TCONS_00043833 | XLOC_036327 | 13201841 | 13202360 | - | 1 | OS02G0327500 | CUFF.6197 OS02T03275(i | TSS3853 | 6.428E-42         |
| chr2 | TCONS_00043836 | XLOC_036342 | 13311392 | 13311725 | - | 1 | NA           | CUFF.6202 NA           | u       | TSS3855 1.283E-05 |
| chr2 | TCONS_00039992 | XLOC_036348 | 13370462 | 13370708 | - | 1 | NA           | CUFF.4822 NA           | u       | TSS3856 5.524E-13 |
| chr2 | TCONS_00043841 | XLOC_036375 | 13609586 | 13609951 | - | 1 | NA           | CUFF.6221 NA           | u       | TSS3859 1.335E-33 |
| chr2 | TCONS_00043843 | XLOC_036377 | 13613152 | 13613772 | - | 1 | NA           | CUFF.6220 NA           | u       | TSS3859 5.443E-25 |
| chr2 | TCONS_00043844 | XLOC_036378 | 13613908 | 13614280 | - | 1 | NA           | CUFF.6218 NA           | u       | TSS3859 6.232E-55 |
| chr2 | TCONS_00043845 | XLOC_036379 | 13656740 | 13657341 | - | 1 | NA           | CUFF.6246 NA           | u       | TSS3859 6.174E-32 |
| chr2 | TCONS_00043853 | XLOC_036523 | 15511226 | 15511525 | - | 1 | OS02G0462500 | CUFF.6307 OS02T04625(i | TSS3874 | 4.293E-21         |
| chr2 | TCONS_00040164 | XLOC_036524 | 15512578 | 15512787 | - | 1 | NA           | CUFF.4856 NA           | u       | TSS3874 0         |
| chr2 | TCONS_00043854 | XLOC_036525 | 15526926 | 15527129 | - | 1 | OS02G0462900 | CUFF.6305 OS02T04629(i | TSS3874 | 1.399E-43         |
| chr2 | TCONS_00043859 | XLOC_036555 | 15772710 | 15773067 | - | 1 | OS02G0468400 | CUFF.6326 OS02T04684(x | TSS3878 | 4.257E-36         |
| chr2 | TCONS_00043861 | XLOC_036562 | 15845850 | 15846228 | - | 1 | OS02G0469200 | CUFF.6352 OS02T04692(i | TSS3878 | 4.766E-28         |
| chr2 | TCONS_00043863 | XLOC_036587 | 16147302 | 16147665 | - | 1 | NA           | CUFF.6356 NA           | u       | TSS3881 1.063E-19 |
| chr2 | TCONS_00040229 | XLOC_036590 | 16167706 | 16167942 | - | 1 | NA           | CUFF.4892 NA           | u       | TSS3881 0         |
| chr2 | TCONS_00040248 | XLOC_036609 | 16260119 | 16260384 | - | 1 | OS02G0475300 | CUFF.4908 OS02T04753(i | TSS3883 | 6.096E-16         |
| chr2 | TCONS_00043866 | XLOC_036626 | 16441144 | 16441346 | - | 1 | OS02G0478600 | CUFF.6372 OS02T04786(i | TSS3885 | 1.069E-70         |
| chr2 | TCONS_00043867 | XLOC_036628 | 16442310 | 16442547 | - | 1 | OS02G0478600 | CUFF.6371 OS02T04786(x | TSS3885 | 0.48773           |
| chr2 | TCONS_00043873 | XLOC_036721 | 17279313 | 17279514 | - | 1 | OS02G0493650 | CUFF.6396 OS02T04936(x | TSS3895 | 7.187E-39         |
| chr2 | TCONS_00043881 | XLOC_036753 | 17577913 | 17578134 | - | 1 | OS02G0499000 | CUFF.6406 OS02T04990(i | TSS3898 | 1.393E-43         |
| chr2 | TCONS_00043883 | XLOC_036774 | 17847156 | 17847476 | - | 1 | OS02G0503400 | CUFF.6418 OS02T05034(i | TSS3900 | 8.061E-36         |
| chr2 | TCONS_00040424 | XLOC_036787 | 17999299 | 17999585 | - | 1 | NA           | CUFF.4939 NA           | u       | TSS3902 3.698E-13 |
| chr2 | TCONS_00040428 | XLOC_036791 | 18043842 | 18044262 | - | 1 | OS02G0506500 | CUFF.4962 OS02T05065(i | TSS3902 | 9.689E-15         |
| chr2 | TCONS_00040446 | XLOC_036808 | 18238094 | 18238294 | - | 1 | OS02G0510200 | CUFF.4953 OS02T05102(x | TSS3904 | 0                 |
| chr2 | TCONS_00043887 | XLOC_036823 | 18447183 | 18447521 | - | 1 | OS02G0513000 | CUFF.6433 OS02T05130(x | TSS3905 | 7.638E-07         |
| chr2 | TCONS_00043888 | XLOC_036851 | 18708307 | 18708594 | - | 1 | OS02G0517300 | CUFF.6451 OS02T05173(i | TSS3908 | 8.155E-21         |
| chr2 | TCONS_00043891 | XLOC_036871 | 18903978 | 18904181 | - | 1 | NA           | CUFF.6445 NA           | u       | TSS3911 1.326E-28 |
| chr2 | TCONS_00040516 | XLOC_036875 | 18917191 | 18917432 | - | 1 | OS02G0519900 | CUFF.5009 OS02T05199(i | TSS3911 | 2.524E-26         |

|      |                |             |          |          |   |   |              |                        |   |         |           |
|------|----------------|-------------|----------|----------|---|---|--------------|------------------------|---|---------|-----------|
| chr2 | TCONS_00040536 | XLOC_036895 | 19055182 | 19055382 | - | 1 | NA           | CUFF.4982 NA           | u | TSS3913 | 8.074E-47 |
| chr2 | TCONS_00043898 | XLOC_036918 | 19251417 | 19251669 | - | 1 | NA           | CUFF.6453 NA           | u | TSS3916 | 6.269E-37 |
| chr2 | TCONS_00043899 | XLOC_036920 | 19262981 | 19263182 | - | 1 | NA           | CUFF.6454 NA           | u | TSS3916 | 2.943E-20 |
| chr2 | TCONS_00043900 | XLOC_036929 | 19343791 | 19344030 | - | 1 | OS02G0527900 | CUFF.6459 OS02T05279(x |   | TSS3917 | 2.165E-14 |
| chr2 | TCONS_00043905 | XLOC_036977 | 19683100 | 19683556 | - | 1 | OS02G0534400 | CUFF.6499 OS02T05344(x |   | TSS3922 | 0.15545   |
| chr2 | TCONS_00040657 | XLOC_037013 | 19974611 | 19974907 | - | 1 | OS02G0539100 | CUFF.5021 OS02T05391(i |   | TSS3926 | 7.884E-22 |
| chr2 | TCONS_00043909 | XLOC_037019 | 20011207 | 20011498 | - | 1 | NA           | CUFF.6506 NA           | u | TSS3926 | 2.869E-25 |
| chr2 | TCONS_00040697 | XLOC_037054 | 20373029 | 20373279 | - | 1 | NA           | CUFF.5027 NA           | u | TSS3930 | 4.746E-28 |
| chr2 | TCONS_00040698 | XLOC_037055 | 20373341 | 20373542 | - | 1 | NA           | CUFF.5032 NA           | u | TSS3930 | 0         |
| chr2 | TCONS_00043917 | XLOC_037060 | 20379720 | 20380109 | - | 1 | NA           | CUFF.6527 NA           | u | TSS3931 | 3.721E-34 |
| chr2 | TCONS_00040712 | XLOC_037078 | 20454036 | 20454290 | - | 1 | NA           | CUFF.5037 NA           | u | TSS3933 | 0.012046  |
| chr2 | TCONS_00043928 | XLOC_037094 | 20657055 | 20657643 | - | 1 | OS02G0549700 | CUFF.6558 OS02T05497(i |   | TSS3934 | 6.174E-32 |
| chr2 | TCONS_00043932 | XLOC_037124 | 20899108 | 20899784 | - | 1 | OS02G0553802 | CUFF.6561 OS02T05538(x |   | TSS3937 | 0.43802   |
| chr2 | TCONS_00043935 | XLOC_037143 | 21024165 | 21024399 | - | 1 | NCRNA_4923   | CUFF.6560 NCRNA_492:x  |   | TSS3939 | 1.701E-48 |
| chr2 | TCONS_00040784 | XLOC_037154 | 21083797 | 21084007 | - | 1 | OS02G0557100 | CUFF.5072 OS02T05571(i |   | TSS3940 | 2.128E-49 |
| chr2 | TCONS_00040876 | XLOC_037241 | 21665016 | 21665320 | - | 1 | NA           | CUFF.5085 NA           | u | TSS3950 | 4.884E-80 |
| chr2 | TCONS_00040932 | XLOC_037296 | 22082814 | 22083049 | - | 1 | OS02G0575500 | CUFF.5106 OS02T05755(x |   | TSS3955 | 7.659E-27 |
| chr2 | TCONS_00043942 | XLOC_037300 | 22096572 | 22097221 | - | 1 | OS02G0575700 | CUFF.6610 OS02T05757(i |   | TSS3956 | 4.812E-09 |
| chr2 | TCONS_00040953 | XLOC_037320 | 22233237 | 22233472 | - | 1 | OS02G0578366 | CUFF.5109 OS02T05783(x |   | TSS3958 | 0         |
| chr2 | TCONS_00043944 | XLOC_037324 | 22297325 | 22297777 | - | 1 | OS02G0579600 | CUFF.6623 OS02T05796(i |   | TSS3958 | 1.066E-17 |
| chr2 | TCONS_00043945 | XLOC_037325 | 22298208 | 22299129 | - | 1 | OS02G0579600 | CUFF.6627 OS02T05796(i |   | TSS3958 | 2.943E-20 |
| chr2 | TCONS_00043947 | XLOC_037327 | 22300583 | 22301216 | - | 1 | OS02G0579600 | CUFF.6619 OS02T05796(x |   | TSS3958 | 1.444E-14 |
| chr2 | TCONS_00041021 | XLOC_037384 | 22620260 | 22620468 | - | 1 | NA           | CUFF.5131 NA           | u | TSS3965 | 5.848E-46 |
| chr2 | TCONS_00041022 | XLOC_037385 | 22636905 | 22637155 | - | 1 | OS02G0587300 | CUFF.5133 OS02T05873(x |   | TSS3965 | 0.075834  |
| chr2 | TCONS_00043952 | XLOC_037412 | 22892531 | 22892739 | - | 1 | OS02G0591900 | CUFF.6645 OS02T05919(i |   | TSS3968 | 1.033E-24 |
| chr2 | TCONS_00041054 | XLOC_037414 | 22898267 | 22898968 | - | 1 | NCRNA_1202   | CUFF.5211 NCRNA_120:x  |   | TSS3968 | 0         |
| chr2 | TCONS_00041058 | XLOC_037418 | 22928565 | 22928819 | - | 1 | OS02G0592400 | CUFF.5145 OS02T05924(i |   | TSS3968 | 7.373E-82 |
| chr2 | TCONS_00043953 | XLOC_037419 | 22929197 | 22929696 | - | 1 | OS02G0592400 | CUFF.6651 OS02T05924(i |   | TSS3968 | 0.75013   |
| chr2 | TCONS_00041107 | XLOC_037461 | 23217125 | 23217390 | - | 1 | OS02G0597300 | CUFF.5162 OS02T05973(i |   | TSS3973 | 2.735E-51 |
| chr2 | TCONS_00041116 | XLOC_037471 | 23268259 | 23268581 | - | 1 | OS02G0598300 | CUFF.5169 OS02T05983(i |   | TSS3974 | 1.348E-48 |
| chr2 | TCONS_00043963 | XLOC_037489 | 23480716 | 23481060 | - | 1 | OS02G0600400 | CUFF.6681 OS02T06004(i |   | TSS3976 | 1.326E-28 |
| chr2 | TCONS_00041143 | XLOC_037499 | 23531182 | 23531412 | - | 1 | NA           | CUFF.5178 NA           | u | TSS3977 | 0         |
| chr2 | TCONS_00043965 | XLOC_037507 | 23566660 | 23567029 | - | 1 | NA           | CUFF.6687 NA           | u | TSS3978 | 1.326E-28 |
| chr2 | TCONS_00041154 | XLOC_037508 | 23567555 | 23567798 | - | 1 | NA           | CUFF.5181 NA           | u | TSS3978 | 0         |
| chr2 | TCONS_00043967 | XLOC_037508 | 23567675 | 23568256 | - | 1 | NA           | CUFF.6688 NA           | u | TSS3978 | 0         |

|      |                |             |          |          |   |   |              |           |              |   |         |           |
|------|----------------|-------------|----------|----------|---|---|--------------|-----------|--------------|---|---------|-----------|
| chr2 | TCONS_00043969 | XLOC_037513 | 23590097 | 23590382 | - | 1 | NA           | CUFF.6690 | NA           | u | TSS3979 | 1.991E-12 |
| chr2 | TCONS_00043973 | XLOC_037523 | 23643762 | 23644252 | - | 1 | OS02G0603600 | CUFF.6696 | OS02T06036(i |   | TSS3980 | 0.051036  |
| chr2 | TCONS_00043974 | XLOC_037524 | 23646186 | 23646661 | - | 1 | OS02G0603600 | CUFF.6705 | OS02T06036(i |   | TSS3980 | 3.129E-15 |
| chr2 | TCONS_00043975 | XLOC_037525 | 23648347 | 23648573 | - | 1 | OS02G0603600 | CUFF.6711 | OS02T06036(i |   | TSS3980 | 6.604E-06 |
| chr2 | TCONS_00043981 | XLOC_037565 | 23904665 | 23904908 | - | 1 | OS02G0609200 | CUFF.6718 | OS02T06092(x |   | TSS3985 | 6.269E-37 |
| chr2 | TCONS_00043983 | XLOC_037578 | 24045553 | 24045871 | - | 1 | OS02G0611200 | CUFF.6734 | OS02T06112(i |   | TSS3986 | 5.592E-20 |
| chr2 | TCONS_00043984 | XLOC_037584 | 24082034 | 24082670 | - | 1 | OS02G0611800 | CUFF.6740 | OS02T06118(i |   | TSS3987 | 0.010754  |
| chr2 | TCONS_00041229 | XLOC_037585 | 24082774 | 24083489 | - | 1 | OS02G0611800 | CUFF.5208 | OS02T06118(x |   | TSS3987 | 5.382E-51 |
| chr2 | TCONS_00041247 | XLOC_037600 | 24239726 | 24239943 | - | 1 | OS02G0614100 | CUFF.5213 | OS02T06141(x |   | TSS3988 | 0         |
| chr2 | TCONS_00043987 | XLOC_037625 | 24564559 | 24564869 | - | 1 | OS02G0618000 | CUFF.6765 | OS02T06180(x |   | TSS3991 | 3.019E-54 |
| chr2 | TCONS_00041286 | XLOC_037637 | 24685969 | 24686208 | - | 1 | NA           | CUFF.5226 | NA           | u | TSS3992 | 2.511E-31 |
| chr2 | TCONS_00043993 | XLOC_037665 | 24900138 | 24900543 | - | 1 | OS02G0624400 | CUFF.6776 | OS02T06244(x |   | TSS3995 | 3.129E-15 |
| chr2 | TCONS_00043994 | XLOC_037676 | 24996134 | 24996642 | - | 1 | NA           | CUFF.6779 | NA           | u | TSS3997 | 8.436E-05 |
| chr2 | TCONS_00043998 | XLOC_037696 | 25164883 | 25165145 | - | 1 | PIP2-2       | CUFF.6794 | OS02T06292(x |   | TSS3999 | 1.917E-65 |
| chr2 | TCONS_00044002 | XLOC_037736 | 25402897 | 25403326 | - | 1 | OS02G0633300 | CUFF.6797 | OS02T06333(x |   | TSS4003 | 5.453E-23 |
| chr2 | TCONS_00041396 | XLOC_037741 | 25435567 | 25435786 | - | 1 | OS02G0634600 | CUFF.5254 | OS02T06346(x |   | TSS4004 | 1.696E-26 |
| chr2 | TCONS_00044003 | XLOC_037750 | 25494436 | 25494636 | - | 1 | NA           | CUFF.6800 | NA           | u | TSS4005 | 8.25E-41  |
| chr2 | TCONS_00041427 | XLOC_037773 | 25630692 | 25630920 | - | 1 | OS02G0639000 | CUFF.5266 | OS02T06390(i |   | TSS4007 | 1.062E-37 |
| chr2 | TCONS_00041459 | XLOC_037801 | 25880055 | 25880284 | - | 1 | NA           | CUFF.5265 | NA           | u | TSS4010 | 7.707E-37 |
| chr2 | TCONS_00044007 | XLOC_037817 | 25998710 | 25998921 | - | 1 | OS02G0645600 | CUFF.6816 | OS02T06456(x |   | TSS4012 | 2.02E-19  |
| chr2 | TCONS_00044008 | XLOC_037819 | 26031894 | 26032258 | - | 1 | GRXS6        | CUFF.6817 | OS02T06464(i |   | TSS4012 | 3.405E-06 |
| chr2 | TCONS_00041517 | XLOC_037853 | 26366096 | 26366320 | - | 1 | OS02G0653800 | CUFF.5283 | OS02T06538(i |   | TSS4016 | 2.74E-16  |
| chr2 | TCONS_00041519 | XLOC_037855 | 26368565 | 26368807 | - | 1 | OS02G0653800 | CUFF.5284 | OS02T06538(x |   | TSS4016 | 0.075834  |
| chr2 | TCONS_00044010 | XLOC_037856 | 26369084 | 26369305 | - | 1 | OS02G0653800 | CUFF.6833 | OS02T06538(x |   | TSS4016 | 1.947E-29 |
| chr2 | TCONS_00041522 | XLOC_037858 | 26387328 | 26387548 | - | 1 | OS02G0654100 | CUFF.5277 | OS02T06541(i |   | TSS4016 | 4.746E-33 |
| chr2 | TCONS_00044015 | XLOC_037876 | 26520954 | 26521407 | - | 1 | OS02G0656500 | CUFF.6855 | OS02T06565(i |   | TSS4018 | 5.443E-25 |
| chr2 | TCONS_00044019 | XLOC_037927 | 26947721 | 26948047 | - | 1 | NA           | CUFF.6860 | NA           | u | TSS4023 | 2.02E-19  |
| chr2 | TCONS_00044022 | XLOC_037948 | 27046648 | 27046990 | - | 1 | PIP1-1       | CUFF.6895 | OS02T06662(i |   | TSS4025 | 1.02E-52  |
| chr2 | TCONS_00044026 | XLOC_037962 | 27110787 | 27110999 | - | 1 | NA           | CUFF.6878 | NA           | u | TSS4027 | 2.02E-19  |
| chr2 | TCONS_00041655 | XLOC_037988 | 27319675 | 27319915 | - | 1 | OS02G0672100 | CUFF.5328 | OS02T06721(i |   | TSS4030 | 4.21E-20  |
| chr2 | TCONS_00041664 | XLOC_037997 | 27418433 | 27418674 | - | 1 | OS02G0673500 | CUFF.5329 | OS02T06735(x |   | TSS4031 | 1.463E-23 |
| chr2 | TCONS_00044034 | XLOC_038008 | 27550522 | 27550729 | - | 1 | OS02G0675800 | CUFF.6912 | OS02T06758(i |   | TSS4032 | 2.26E-21  |
| chr2 | TCONS_00044035 | XLOC_038009 | 27559735 | 27559952 | - | 1 | OS02G0676000 | CUFF.6916 | OS02T06760(i |   | TSS4033 | 2.345E-72 |
| chr2 | TCONS_00041676 | XLOC_038010 | 27562214 | 27562569 | - | 1 | OS02G0676000 | CUFF.5331 | OS02T06760(i |   | TSS4033 | 9.842E-22 |
| chr2 | TCONS_00044038 | XLOC_038019 | 27663270 | 27663474 | - | 1 | OS02G0677700 | CUFF.6927 | OS02T06777(x |   | TSS4034 | 2.529E-33 |

|      |                |             |          |          |   |   |              |           |              |         |           |
|------|----------------|-------------|----------|----------|---|---|--------------|-----------|--------------|---------|-----------|
| chr2 | TCONS_00044040 | XLOC_038028 | 27771251 | 27771452 | - | 1 | OS02G0680500 | CUFF.6926 | OS02T06805(i | TSS4034 | 1.562E-40 |
| chr2 | TCONS_00041698 | XLOC_038036 | 27839356 | 27839605 | - | 1 | NA           | CUFF.5341 | NA u         | TSS4035 | 3.386E-18 |
| chr2 | TCONS_00041711 | XLOC_038050 | 27966213 | 27966428 | - | 1 | OS02G0684000 | CUFF.5346 | OS02T06840(x | TSS4037 | 1.04E-59  |
| chr2 | TCONS_00041728 | XLOC_038068 | 28092777 | 28092979 | - | 1 | NA           | CUFF.5353 | NA u         | TSS4039 | 0         |
| chr2 | TCONS_00041750 | XLOC_038091 | 28247344 | 28247560 | - | 1 | OS02G0688800 | CUFF.5361 | OS02T06888(x | TSS4041 | 0         |
| chr2 | TCONS_00044046 | XLOC_038102 | 28334349 | 28334607 | - | 1 | OS02G0690200 | CUFF.6954 | OS02T06902(i | TSS4042 | 3.907E-44 |
| chr2 | TCONS_00041765 | XLOC_038106 | 28356138 | 28356364 | - | 1 | OS02G0690700 | CUFF.5373 | OS02T06907(i | TSS4043 | 4.042E-30 |
| chr2 | TCONS_00044052 | XLOC_038139 | 28638499 | 28638801 | - | 1 | NA           | CUFF.6969 | NA u         | TSS4046 | 1.063E-19 |
| chr2 | TCONS_00041802 | XLOC_038145 | 28673028 | 28673252 | - | 1 | OS02G0697300 | CUFF.5391 | OS02T06973(x | TSS4047 | 0         |
| chr2 | TCONS_00041813 | XLOC_038157 | 28717438 | 28717800 | - | 1 | NA           | CUFF.5393 | NA u         | TSS4048 | 0.12416   |
| chr2 | TCONS_00041814 | XLOC_038158 | 28717876 | 28718190 | - | 1 | NA           | CUFF.5394 | NA u         | TSS4048 | 1.202E-07 |
| chr2 | TCONS_00041815 | XLOC_038159 | 28718331 | 28719263 | - | 1 | NA           | CUFF.5395 | NA u         | TSS4048 | 0         |
| chr2 | TCONS_00041816 | XLOC_038160 | 28721129 | 28721986 | - | 1 | NCRNA_3847   | CUFF.5468 | NCRNA_384' x | TSS4049 | 0         |
| chr2 | TCONS_00044061 | XLOC_038163 | 28750408 | 28750821 | - | 1 | OS02G0699000 | CUFF.6995 | OS02T06990(i | TSS4049 | 1.296E-49 |
| chr2 | TCONS_00044062 | XLOC_038166 | 28757436 | 28757874 | - | 1 | OS02G0699300 | CUFF.6988 | OS02T06993(x | TSS4049 | 4.293E-21 |
| chr2 | TCONS_00044063 | XLOC_038167 | 28761135 | 28761473 | - | 1 | NA           | CUFF.6981 | NA u         | TSS4049 | 0.002878  |
| chr2 | TCONS_00044064 | XLOC_038169 | 28767150 | 28767550 | - | 1 | OS02G0699400 | CUFF.6990 | OS02T06994(x | TSS4049 | 3.301E-22 |
| chr2 | TCONS_00041851 | XLOC_038198 | 28972802 | 28973040 | - | 1 | NA           | CUFF.5402 | NA u         | TSS4053 | 1.003E-14 |
| chr2 | TCONS_00041864 | XLOC_038210 | 29070211 | 29070492 | - | 1 | OS02G0704500 | CUFF.5406 | OS02T07045(i | TSS4054 | 4.188E-73 |
| chr2 | TCONS_00041876 | XLOC_038222 | 29115232 | 29115550 | - | 1 | OS02G0705400 | CUFF.5413 | OS02T07054(x | TSS4055 | 0.067073  |
| chr2 | TCONS_00041900 | XLOC_038245 | 29302566 | 29303141 | - | 1 | OS02G0708600 | CUFF.7028 | OS02T07086(x | TSS4058 | 0.071396  |
| chr2 | TCONS_00044074 | XLOC_038251 | 29342091 | 29342592 | - | 1 | ADL1         | CUFF.7037 | OS02T07094(i | TSS4058 | 5.443E-25 |
| chr2 | TCONS_00041916 | XLOC_038261 | 29447828 | 29448036 | - | 1 | OS02G0710800 | CUFF.5425 | OS02T07108(x | TSS4059 | 9.843E-39 |
| chr2 | TCONS_00044075 | XLOC_038263 | 29453638 | 29453865 | - | 1 | OS02G0710900 | CUFF.7044 | OS02T07109(x | TSS4060 | 1.326E-28 |
| chr2 | TCONS_00044077 | XLOC_038281 | 29594986 | 29595260 | - | 1 | OS02G0714000 | CUFF.7045 | OS02T07140(x | TSS4062 | 9.077E-33 |
| chr2 | TCONS_00041975 | XLOC_038320 | 29860330 | 29860741 | - | 1 | ML2          | CUFF.5471 | OS02T07198(i | TSS4066 | 9.128E-40 |
| chr2 | TCONS_00044079 | XLOC_038321 | 29861580 | 29861952 | - | 1 | ML2          | CUFF.7059 | OS02T07198(i | TSS4066 | 1.643E-15 |
| chr2 | TCONS_00044081 | XLOC_038325 | 29872591 | 29872906 | - | 1 | NA           | CUFF.7050 | NA u         | TSS4066 | 1.658E-57 |
| chr2 | TCONS_00044082 | XLOC_038327 | 29875213 | 29875530 | - | 1 | OS02G0720000 | CUFF.7052 | OS02T07200(x | TSS4066 | 8.626E-16 |
| chr2 | TCONS_00044088 | XLOC_038427 | 30558978 | 30559182 | - | 1 | OS02G0732900 | CUFF.7085 | OS02T07329(x | TSS4077 | 2.638E-18 |
| chr2 | TCONS_00044089 | XLOC_038429 | 30561778 | 30561984 | - | 1 | OS02G0733001 | CUFF.7086 | OS02T07330(i | TSS4077 | 2.216E-26 |
| chr2 | TCONS_00042097 | XLOC_038440 | 30626040 | 30626240 | - | 1 | OS02G0734300 | CUFF.5493 | OS02T07343(x | TSS4078 | 0.0049983 |
| chr2 | TCONS_00044093 | XLOC_038445 | 30659020 | 30659410 | - | 1 | OS02G0734900 | CUFF.7090 | OS02T07349(x | TSS4079 | 1.184E-26 |
| chr2 | TCONS_00042165 | XLOC_038509 | 31079064 | 31079583 | - | 1 | NCRNA_2545   | CUFF.7116 | NCRNA_254: x | TSS4086 | 0         |
| chr2 | TCONS_00042166 | XLOC_038510 | 31079695 | 31080823 | - | 1 | OS02G0742100 | CUFF.7157 | OS02T07421(x | TSS4086 | 1.834E-27 |



|      |                |             |          |          |   |   |              |           |              |         |           |
|------|----------------|-------------|----------|----------|---|---|--------------|-----------|--------------|---------|-----------|
| chr2 | TCONS_00042186 | XLOC_038529 | 31211854 | 31212058 | - | 1 | OS02G0744100 | CUFF.5526 | OS02T07441(i | TSS4088 | 1.741E-80 |
| chr2 | TCONS_00044109 | XLOC_038587 | 31665836 | 31666153 | - | 1 | NA           | CUFF.7159 | NA u         | TSS4094 | 1.326E-28 |
| chr2 | TCONS_00042250 | XLOC_038596 | 31721421 | 31721637 | - | 1 | OS02G0754300 | CUFF.5547 | OS02T07543(x | TSS4094 | 1.084E-42 |
| chr2 | TCONS_00044111 | XLOC_038604 | 31755320 | 31755601 | - | 1 | OS02G0754800 | CUFF.7164 | OS02T07548(i | TSS4095 | 3.161E-50 |
| chr2 | TCONS_00044112 | XLOC_038624 | 31921994 | 31922224 | - | 1 | HSP24.1      | CUFF.7175 | OS02T07580(x | TSS4097 | 1.529E-29 |
| chr2 | TCONS_00044115 | XLOC_038641 | 32007701 | 32008108 | - | 1 | OS02G0760200 | CUFF.7191 | OS02T07602(x | TSS4099 | 0         |
| chr2 | TCONS_00044118 | XLOC_038650 | 32064924 | 32065338 | - | 1 | NA           | CUFF.7185 | NA u         | TSS4100 | 1.25E-16  |
| chr2 | TCONS_00044122 | XLOC_038666 | 32165056 | 32165455 | - | 1 | OS02G0763200 | CUFF.7197 | OS02T07632(i | TSS4102 | 4.082E-12 |
| chr2 | TCONS_00042384 | XLOC_038723 | 32561240 | 32561460 | - | 1 | OS02G0771600 | CUFF.5595 | OS02T07716(i | TSS4108 | 3.518E-53 |
| chr2 | TCONS_00042403 | XLOC_038742 | 32684729 | 32684939 | - | 1 | OS02G0774100 | CUFF.5591 | OS02T07741(i | TSS4110 | 1.14E-26  |
| chr2 | TCONS_00044135 | XLOC_038780 | 32953809 | 32954088 | - | 1 | OS02G0778400 | CUFF.7235 | OS02T07784(x | TSS4114 | 1.739E-22 |
| chr2 | TCONS_00042457 | XLOC_038791 | 32996898 | 32997114 | - | 1 | NA           | CUFF.5608 | NA u         | TSS4115 | 0         |
| chr2 | TCONS_00044137 | XLOC_038792 | 32997622 | 32998032 | - | 1 | NA           | CUFF.7237 | NA u         | TSS4116 | 2.474E-05 |
| chr2 | TCONS_00044138 | XLOC_038800 | 33068048 | 33068248 | - | 1 | OS02G0780550 | CUFF.7240 | OS02T07805(i | TSS4116 | 3.301E-22 |
| chr2 | TCONS_00042469 | XLOC_038805 | 33076219 | 33076425 | - | 1 | OS02G0780600 | CUFF.5612 | OS02T07806(x | TSS4117 | 0         |
| chr2 | TCONS_00044141 | XLOC_038821 | 33191662 | 33191864 | - | 1 | NA           | CUFF.7245 | NA u         | TSS4119 | 1.527E-35 |
| chr2 | TCONS_00044142 | XLOC_038822 | 33191928 | 33192224 | - | 1 | NA           | CUFF.7246 | NA u         | TSS4119 | 6.859E-10 |
| chr2 | TCONS_00042517 | XLOC_038848 | 33382108 | 33382345 | - | 1 | NA           | CUFF.5633 | NA u         | TSS4122 | 2.325E-27 |
| chr2 | TCONS_00044147 | XLOC_038850 | 33402659 | 33402874 | - | 1 | OS02G0786400 | CUFF.7274 | OS02T07864(i | TSS4122 | 3.301E-22 |
| chr2 | TCONS_00044152 | XLOC_038891 | 33709230 | 33709576 | - | 1 | NA           | CUFF.7289 | NA u         | TSS4126 | 1.991E-12 |
| chr2 | TCONS_00042566 | XLOC_038898 | 33752204 | 33752420 | - | 1 | NA           | CUFF.5648 | NA u         | TSS4127 | 0         |
| chr2 | TCONS_00042567 | XLOC_038899 | 33752767 | 33752990 | - | 1 | NA           | CUFF.5647 | NA u         | TSS4127 | 8.985E-35 |
| chr2 | TCONS_00044156 | XLOC_038900 | 33753658 | 33753940 | - | 1 | NA           | CUFF.7293 | NA u         | TSS4127 | 1.815E-17 |
| chr2 | TCONS_00044159 | XLOC_038925 | 33914366 | 33914608 | - | 1 | OS02G0796900 | CUFF.7305 | OS02T07969(x | TSS4130 | 0         |
| chr2 | TCONS_00042599 | XLOC_038931 | 33971124 | 33971341 | - | 1 | OS02G0798100 | CUFF.5670 | OS02T07981(x | TSS4131 | 2.953E-34 |
| chr2 | TCONS_00042604 | XLOC_038938 | 33988245 | 33988458 | - | 1 | NA           | CUFF.5667 | NA u         | TSS4131 | 1.167E-21 |
| chr2 | TCONS_00042634 | XLOC_038959 | 34161830 | 34162048 | - | 1 | NA           | CUFF.5676 | NA u         | TSS4134 | 1.332E-50 |
| chr2 | TCONS_00044167 | XLOC_038970 | 34223678 | 34224022 | - | 1 | OS02G0802700 | CUFF.7324 | OS02T08027(x | TSS4136 | 0.002878  |
| chr2 | TCONS_00042644 | XLOC_038971 | 34224385 | 34224900 | - | 1 | OS02G0802700 | CUFF.5683 | OS02T08027(i | TSS4136 | 2.217E-23 |
| chr2 | TCONS_00042645 | XLOC_038972 | 34227839 | 34228064 | - | 1 | NA           | CUFF.5679 | NA u         | TSS4136 | 4.042E-30 |
| chr2 | TCONS_00042648 | XLOC_038975 | 34245885 | 34246099 | - | 1 | OS02G0803250 | CUFF.5685 | OS02T08032(x | TSS4136 | 6.529E-34 |
| chr2 | TCONS_00042677 | XLOC_039000 | 34409700 | 34410212 | - | 1 | OS02G0806350 | CUFF.5695 | OS02T08063(i | TSS4139 | 1.078E-87 |
| chr2 | TCONS_00042701 | XLOC_039019 | 34550178 | 34550397 | - | 1 | OS02G0808300 | CUFF.5700 | OS02T08083(i | TSS4141 | 1.392E-19 |
| chr2 | TCONS_00044182 | XLOC_039058 | 34820331 | 34820534 | - | 1 | OS02G0813000 | CUFF.7364 | OS02T08130(i | TSS4145 | 6.268E-22 |
| chr2 | TCONS_00044184 | XLOC_039063 | 34840819 | 34841077 | - | 1 | GRC2         | CUFF.7387 | OS02T08135(i | TSS4146 | 3.907E-44 |

|      |                |             |          |          |   |   |              |           |              |         |           |           |
|------|----------------|-------------|----------|----------|---|---|--------------|-----------|--------------|---------|-----------|-----------|
| chr2 | TCONS_00042816 | XLOC_039129 | 35275807 | 35276222 | - | 1 | OS02G0821900 | CUFF.5742 | OS02T08219(i | TSS4153 | 1.2E-46   |           |
| chr2 | TCONS_00042817 | XLOC_039130 | 35277162 | 35277396 | - | 1 | OS02G0821900 | CUFF.5743 | OS02T08219(i | TSS4153 | 0         |           |
| chr2 | TCONS_00042823 | XLOC_039137 | 35296868 | 35297069 | - | 1 | NA           | CUFF.5740 | NA           | u       | TSS4154   | 0         |
| chr2 | TCONS_00044199 | XLOC_039146 | 35356812 | 35357046 | - | 1 | OS02G0823200 | CUFF.7407 | OS02T08232(x | TSS4155 | 7.959E-31 |           |
| chr2 | TCONS_00044200 | XLOC_039164 | 35436853 | 35437142 | - | 1 | NA           | CUFF.7412 | NA           | u       | TSS4157   | 1.61E-45  |
| chr2 | TCONS_00044205 | XLOC_039219 | 35727009 | 35728131 | - | 1 | NA           | CUFF.7430 | NA           | u       | TSS4163   | 5.936E-05 |
| chr2 | TCONS_00042930 | XLOC_039234 | 35795252 | 35795640 | - | 1 | OS02G0832400 | CUFF.5781 | OS02T08324(i | TSS4165 | 1.804E-06 |           |
| chr2 | TCONS_00044208 | XLOC_039239 | 35802430 | 35802768 | - | 1 | OS02G0832500 | CUFF.7442 | OS02T08325(x | TSS4165 | 3.599E-64 |           |
| chr2 | TCONS_00044209 | XLOC_039240 | 35809453 | 35809790 | - | 1 | OS02G0832700 | CUFF.7452 | OS02T08327(i | TSS4165 | 7.056E-24 |           |
| chr2 | TCONS_00044210 | XLOC_039257 | 2558407  | 2558616  | . | 1 | OS02G0146600 | CUFF.5609 | OS02T01466(i | TSS4167 | 9.036E-28 |           |
| chr2 | TCONS_00042951 | XLOC_039260 | 4283538  | 4283743  | . | 1 | 4CL3         | CUFF.4504 | OS02T01776(i | TSS4168 | 1.484E-54 |           |
| chr2 | TCONS_00044235 | XLOC_039285 | 25896645 | 25896849 | . | 1 | OS02G0644000 | CUFF.6819 | OS02T06440(i | TSS4170 | 1.19E-21  |           |
| chr2 | TCONS_00042955 | XLOC_039288 | 27023929 | 27024154 | . | 1 | OS02G0665400 | CUFF.5315 | OS02T06654(i | TSS4170 | 2.74E-16  |           |
| chr2 | TCONS_00042956 | XLOC_039289 | 28017557 | 28017776 | . | 1 | OS02G0684800 | CUFF.5352 | OS02T06848(i | TSS4170 | 4.042E-30 |           |
| chr3 | TCONS_00044342 | XLOC_039391 | 648313   | 648552   | + | 1 | OS03G0111200 | CUFF.5811 | OS03T01112(i | TSS4181 | 0         |           |
| chr3 | TCONS_00054395 | XLOC_039394 | 664839   | 665308   | + | 1 | OS03G0111600 | CUFF.7508 | OS03T01116(i | TSS4181 | 3.839E-19 |           |
| chr3 | TCONS_00054396 | XLOC_039409 | 770623   | 770824   | + | 1 | OS03G0113700 | CUFF.7518 | OS03T01137(i | TSS4183 | 2.943E-20 |           |
| chr3 | TCONS_00044370 | XLOC_039419 | 837354   | 837591   | + | 1 | NA           | CUFF.5820 | NA           | u       | TSS4184   | 2.532E-36 |
| chr3 | TCONS_00044439 | XLOC_039484 | 1199157  | 1199691  | + | 1 | NA           | CUFF.5851 | NA           | u       | TSS4191   | 0.0002804 |
| chr3 | TCONS_00054406 | XLOC_039484 | 1199082  | 1199342  | + | 1 | NA           | CUFF.7553 | NA           | u       | TSS4191   | 1.136E-14 |
| chr3 | TCONS_00044440 | XLOC_039485 | 1200603  | 1200814  | + | 1 | NA           | CUFF.5853 | NA           | u       | TSS4191   | 0         |
| chr3 | TCONS_00044447 | XLOC_039493 | 1236243  | 1236563  | + | 1 | OS03G0122300 | CUFF.5866 | OS03T01223(i | TSS4192 | 2.569E-63 |           |
| chr3 | TCONS_00044448 | XLOC_039494 | 1238768  | 1239173  | + | 1 | OS03G0122300 | CUFF.5867 | OS03T01223(i | TSS4192 | 9.216E-31 |           |
| chr3 | TCONS_00044449 | XLOC_039495 | 1243307  | 1243773  | + | 1 | OS03G0122300 | CUFF.5869 | OS03T01223(i | TSS4192 | 6.84E-39  |           |
| chr3 | TCONS_00054410 | XLOC_039502 | 1284420  | 1284683  | + | 1 | MADS50       | CUFF.7574 | OS03T01226(i | TSS4193 | 9.036E-28 |           |
| chr3 | TCONS_00054411 | XLOC_039503 | 1287348  | 1287572  | + | 1 | MADS50       | CUFF.7579 | OS03T01226(i | TSS4193 | 1.508E-30 |           |
| chr3 | TCONS_00054412 | XLOC_039504 | 1290767  | 1291145  | + | 1 | MADS50       | CUFF.7581 | OS03T01226(i | TSS4193 | 3.022E-26 |           |
| chr3 | TCONS_00054413 | XLOC_039505 | 1292508  | 1292807  | + | 1 | MADS50       | CUFF.7588 | OS03T01226(i | TSS4193 | 3.301E-22 |           |
| chr3 | TCONS_00054414 | XLOC_039506 | 1297671  | 1297988  | + | 1 | MADS50       | CUFF.7598 | OS03T01226(i | TSS4193 | 2.576E-38 |           |
| chr3 | TCONS_00044465 | XLOC_039514 | 1348658  | 1348890  | + | 1 | OS03G0123600 | CUFF.5864 | OS03T01236(i | TSS4194 | 7.057E-33 |           |
| chr3 | TCONS_00054417 | XLOC_039533 | 1466566  | 1466767  | + | 1 | OS03G0125700 | CUFF.7578 | OS03T01257(x | TSS4196 | 6.994E-29 |           |
| chr3 | TCONS_00044489 | XLOC_039537 | 1488584  | 1488828  | + | 1 | OS03G0126000 | CUFF.5875 | OS03T01260(i | TSS4197 | 3.091E-19 |           |
| chr3 | TCONS_00044490 | XLOC_039538 | 1497800  | 1498014  | + | 1 | NA           | CUFF.5868 | NA           | u       | TSS4197   | 3.764E-36 |
| chr3 | TCONS_00054420 | XLOC_039544 | 1518288  | 1518578  | + | 1 | OS03G0126800 | CUFF.7595 | OS03T01268(x | TSS4197 | 1.191E-10 |           |
| chr3 | TCONS_00054423 | XLOC_039559 | 1588719  | 1588996  | + | 1 | NA           | CUFF.7583 | NA           | u       | TSS4199   | 1.72E-32  |

|      |                |             |         |         |   |   |              |           |              |   |         |           |
|------|----------------|-------------|---------|---------|---|---|--------------|-----------|--------------|---|---------|-----------|
| chr3 | TCONS_00054424 | XLOC_039560 | 1589085 | 1589396 | + | 1 | NA           | CUFF.7585 | NA           | u | TSS4199 | 4.766E-28 |
| chr3 | TCONS_00054428 | XLOC_039565 | 1596181 | 1596480 | + | 1 | OS03G0128200 | CUFF.7597 | OS03T01282(i |   | TSS4199 | 1.131E-49 |
| chr3 | TCONS_00054432 | XLOC_039574 | 1653232 | 1653461 | + | 1 | OS03G0129200 | CUFF.7606 | OS03T01292(x |   | TSS4200 | 3.648E-52 |
| chr3 | TCONS_00054433 | XLOC_039575 | 1655659 | 1655859 | + | 1 | OS03G0129200 | CUFF.7610 | OS03T01292(i |   | TSS4200 | 3.258E-32 |
| chr3 | TCONS_00054434 | XLOC_039579 | 1670256 | 1670886 | + | 1 | OS03G0129800 | CUFF.7613 | OS03T01298(i |   | TSS4201 | 2.38E-16  |
| chr3 | TCONS_00054445 | XLOC_039634 | 1971938 | 1972220 | + | 1 | OS03G0135600 | CUFF.7638 | OS03T01356(i |   | TSS4207 | 2.529E-33 |
| chr3 | TCONS_00054446 | XLOC_039635 | 1989413 | 1989623 | + | 1 | NA           | CUFF.7635 | NA           | u | TSS4207 | 7.959E-31 |
| chr3 | TCONS_00044590 | XLOC_039651 | 2061376 | 2061598 | + | 1 | OS03G0137300 | CUFF.5907 | OS03T01373(x |   | TSS4209 | 4.193E-20 |
| chr3 | TCONS_00054452 | XLOC_039742 | 2618601 | 2619145 | + | 1 | NA           | CUFF.7676 | NA           | u | TSS4218 | 9.482E-43 |
| chr3 | TCONS_00044686 | XLOC_039745 | 2624405 | 2624625 | + | 1 | NA           | CUFF.5934 | NA           | u | TSS4219 | 8.259E-31 |
| chr3 | TCONS_00054454 | XLOC_039746 | 2624856 | 2625153 | + | 1 | NA           | CUFF.7677 | NA           | u | TSS4219 | 5.592E-20 |
| chr3 | TCONS_00054457 | XLOC_039749 | 2654961 | 2655205 | + | 1 | OS03G0147400 | CUFF.7701 | OS03T01474(i |   | TSS4219 | 5.765E-45 |
| chr3 | TCONS_00054459 | XLOC_039757 | 2726442 | 2726792 | + | 1 | OS03G0149100 | CUFF.7685 | OS03T01491(x |   | TSS4220 | 2.869E-25 |
| chr3 | TCONS_00044701 | XLOC_039762 | 2751796 | 2752022 | + | 1 | OS03G0149300 | CUFF.5951 | OS03T01493(i |   | TSS4220 | 8.32E-36  |
| chr3 | TCONS_00044715 | XLOC_039779 | 2865441 | 2865675 | + | 1 | NA           | CUFF.5952 | NA           | u | TSS4222 | 2.524E-26 |
| chr3 | TCONS_00044716 | XLOC_039780 | 2865766 | 2865968 | + | 1 | NA           | CUFF.5953 | NA           | u | TSS4222 | 0         |
| chr3 | TCONS_00054464 | XLOC_039793 | 2925390 | 2925722 | + | 1 | NA           | CUFF.7697 | NA           | u | TSS4224 | 4.127E-14 |
| chr3 | TCONS_00054467 | XLOC_039817 | 3051089 | 3051328 | + | 1 | OS03G0156700 | CUFF.7711 | OS03T01567(i |   | TSS4226 | 8.948E-25 |
| chr3 | TCONS_00044792 | XLOC_039857 | 3274080 | 3274795 | + | 1 | OS03G0161200 | CUFF.5977 | OS03T01612(x |   | TSS4230 | 6.622E-39 |
| chr3 | TCONS_00054476 | XLOC_039884 | 3444570 | 3444776 | + | 1 | OS03G0163600 | CUFF.7724 | OS03T01636(x |   | TSS4233 | 5.961E-15 |
| chr3 | TCONS_00044819 | XLOC_039885 | 3446837 | 3447047 | + | 1 | NA           | CUFF.5971 | NA           | u | TSS4233 | 0         |
| chr3 | TCONS_00054480 | XLOC_039906 | 3549648 | 3550439 | + | 1 | NA           | CUFF.7735 | NA           | u | TSS4236 | 0.18277   |
| chr3 | TCONS_00054483 | XLOC_039923 | 3658822 | 3659022 | + | 1 | OS03G0167700 | CUFF.7751 | OS03T01677(x |   | TSS4237 | 3.249E-27 |
| chr3 | TCONS_00044878 | XLOC_039942 | 3757025 | 3757253 | + | 1 | NA           | CUFF.5997 | NA           | u | TSS4239 | 4.378E-29 |
| chr3 | TCONS_00054488 | XLOC_039972 | 4004405 | 4005257 | + | 1 | OS03G0174900 | CUFF.7776 | OS03T01749(i |   | TSS4243 | 1.326E-28 |
| chr3 | TCONS_00054491 | XLOC_040005 | 4199018 | 4199290 | + | 1 | NA           | CUFF.7786 | NA           | u | TSS4246 | 1.508E-30 |
| chr3 | TCONS_00054495 | XLOC_040027 | 4379204 | 4379588 | + | 1 | NA           | CUFF.7796 | NA           | u | TSS4249 | 2.859E-30 |
| chr3 | TCONS_00044981 | XLOC_040045 | 4468384 | 4468585 | + | 1 | NA           | CUFF.6029 | NA           | u | TSS4251 | 0         |
| chr3 | TCONS_00054499 | XLOC_040078 | 4676540 | 4676765 | + | 1 | OS03G0189400 | CUFF.7830 | OS03T01894(i |   | TSS4254 | 7.972E-26 |
| chr3 | TCONS_00054500 | XLOC_040087 | 4712955 | 4713161 | + | 1 | NA           | CUFF.7816 | NA           | u | TSS4255 | 2.638E-18 |
| chr3 | TCONS_00054503 | XLOC_040101 | 4809245 | 4809639 | + | 1 | OS03G0192400 | CUFF.7822 | OS03T01924(i |   | TSS4256 | 3.453E-17 |
| chr3 | TCONS_00054504 | XLOC_040129 | 4953673 | 4953881 | + | 1 | NA           | CUFF.7834 | NA           | u | TSS4259 | 1.947E-29 |
| chr3 | TCONS_00045073 | XLOC_040134 | 4975325 | 4975553 | + | 1 | NA           | CUFF.6061 | NA           | u | TSS4260 | 2.144E-28 |
| chr3 | TCONS_00045074 | XLOC_040135 | 4978656 | 4978860 | + | 1 | NA           | CUFF.6062 | NA           | u | TSS4260 | 5.608E-86 |
| chr3 | TCONS_00045075 | XLOC_040136 | 4984141 | 4984350 | + | 1 | NA           | CUFF.6064 | NA           | u | TSS4260 | 0         |

|      |                |             |         |         |   |   |              |                        |   |         |           |
|------|----------------|-------------|---------|---------|---|---|--------------|------------------------|---|---------|-----------|
| chr3 | TCONS_00054507 | XLOC_040139 | 4986600 | 4986953 | + | 1 | NA           | CUFF.7839 NA           | u | TSS4260 | 6.126E-18 |
| chr3 | TCONS_00045083 | XLOC_040146 | 5005448 | 5005896 | + | 1 | NA           | CUFF.6068 NA           | u | TSS4261 | 7.423E-81 |
| chr3 | TCONS_00045084 | XLOC_040147 | 5006362 | 5006585 | + | 1 | NA           | CUFF.6066 NA           | u | TSS4261 | 1.062E-37 |
| chr3 | TCONS_00045085 | XLOC_040148 | 5007750 | 5007992 | + | 1 | NA           | CUFF.6067 NA           | u | TSS4261 | 4.436E-24 |
| chr3 | TCONS_00045120 | XLOC_040180 | 5285842 | 5286067 | + | 1 | OS03G0200700 | CUFF.6083 OS03T02007(i |   | TSS4265 | 1.135E-31 |
| chr3 | TCONS_00045129 | XLOC_040187 | 5335194 | 5335408 | + | 1 | OS03G0201901 | CUFF.6088 OS03T02019(i |   | TSS4266 | 0         |
| chr3 | TCONS_00045418 | XLOC_040220 | 5616667 | 5616871 | + | 1 | OS03G0207300 | CUFF.7883 OS03T02073(x |   | TSS4269 | 2.638E-18 |
| chr3 | TCONS_00045419 | XLOC_040226 | 5664958 | 5665585 | + | 1 | NA           | CUFF.7886 NA           | u | TSS4270 | 3.839E-19 |
| chr3 | TCONS_00045170 | XLOC_040231 | 5682757 | 5682974 | + | 1 | OS03G0208900 | CUFF.6103 OS03T02089(i |   | TSS4270 | 9.344E-20 |
| chr3 | TCONS_00045187 | XLOC_040247 | 5784851 | 5785060 | + | 1 | OS03G0210800 | CUFF.6110 OS03T02108(x |   | TSS4272 | 0         |
| chr3 | TCONS_00045422 | XLOC_040250 | 5787453 | 5787699 | + | 1 | NA           | CUFF.7895 NA           | u | TSS4272 | 5.209E-35 |
| chr3 | TCONS_00045423 | XLOC_040251 | 5788423 | 5788630 | + | 1 | NA           | CUFF.7893 NA           | u | TSS4273 | 5.016E-18 |
| chr3 | TCONS_00045431 | XLOC_040282 | 5938369 | 5938707 | + | 1 | NA           | CUFF.7903 NA           | u | TSS4276 | 0.0002359 |
| chr3 | TCONS_00045433 | XLOC_040309 | 6139592 | 6140117 | + | 1 | OS03G0216700 | CUFF.7942 OS03T02167(i |   | TSS4279 | 1.001E-27 |
| chr3 | TCONS_00045434 | XLOC_040310 | 6140574 | 6140835 | + | 1 | OS03G0216700 | CUFF.7948 OS03T02167(i |   | TSS4279 | 1.855E-47 |
| chr3 | TCONS_00045249 | XLOC_040311 | 6142365 | 6142610 | + | 1 | OS03G0216700 | CUFF.6142 OS03T02167(i |   | TSS4279 | 2.272E-18 |
| chr3 | TCONS_00045435 | XLOC_040320 | 6222681 | 6223195 | + | 1 | OS03G0218200 | CUFF.7929 OS03T02182(i |   | TSS4280 | 3.802E-12 |
| chr3 | TCONS_00045436 | XLOC_040322 | 6236000 | 6236308 | + | 1 | OS03G0218400 | CUFF.7935 OS03T02184(i |   | TSS4280 | 3.51E-47  |
| chr3 | TCONS_00045259 | XLOC_040323 | 6237671 | 6238091 | + | 1 | OS03G0218400 | CUFF.6137 OS03T02184(x |   | TSS4280 | 1.563E-27 |
| chr3 | TCONS_00045297 | XLOC_040357 | 6520184 | 6520389 | + | 1 | OS03G0224300 | CUFF.6151 OS03T02243(i |   | TSS4284 | 0         |
| chr3 | TCONS_00045337 | XLOC_040392 | 6872850 | 6873092 | + | 1 | OS03G0229600 | CUFF.6167 OS03T02296(i |   | TSS4288 | 1.842E-25 |
| chr3 | TCONS_00045383 | XLOC_040436 | 7103453 | 7104067 | + | 1 | OS03G0234200 | CUFF.8105 OS03T02342(x |   | TSS4293 | 0         |
| chr3 | TCONS_00045444 | XLOC_040438 | 7111094 | 7111493 | + | 1 | OS03G0234600 | CUFF.7986 OS03T02346(x |   | TSS4293 | 3.129E-15 |
| chr3 | TCONS_00045445 | XLOC_040439 | 7129639 | 7130336 | + | 1 | NA           | CUFF.8006 NA           | u | TSS4293 | 0         |
| chr3 | TCONS_00045396 | XLOC_040446 | 7164998 | 7165204 | + | 1 | OS03G0235900 | CUFF.6181 OS03T02359(i |   | TSS4294 | 6.885E-83 |
| chr3 | TCONS_00045416 | XLOC_040466 | 7333445 | 7333674 | + | 1 | OS03G0238800 | CUFF.6184 OS03T02388(i |   | TSS4296 | 1.827E-30 |
| chr3 | TCONS_00045458 | XLOC_040472 | 7368116 | 7369026 | + | 1 | OS03G0239400 | CUFF.8010 OS03T02394(i |   | TSS4296 | 6.428E-42 |
| chr3 | TCONS_00045429 | XLOC_040483 | 7446307 | 7446587 | + | 1 | OS03G0240700 | CUFF.6190 OS03T02407(x |   | TSS4298 | 0         |
| chr3 | TCONS_00045452 | XLOC_040484 | 7448595 | 7449012 | + | 1 | OS03G0240700 | CUFF.7994 OS03T02407(i |   | TSS4298 | 0.0003474 |
| chr3 | TCONS_00045455 | XLOC_040498 | 7566626 | 7567188 | + | 1 | ADF5         | CUFF.8013 OS03T02431(i |   | TSS4299 | 5.01E-43  |
| chr3 | TCONS_00045462 | XLOC_040515 | 7669484 | 7669806 | + | 1 | NA           | CUFF.6193 NA           | u | TSS4301 | 0.0001466 |
| chr3 | TCONS_00045461 | XLOC_040533 | 7757322 | 7757583 | + | 1 | OS03G0246800 | CUFF.8038 OS03T02468(i |   | TSS4303 | 3.243E-08 |
| chr3 | TCONS_00045485 | XLOC_040534 | 7757922 | 7758221 | + | 1 | OS03G0246800 | CUFF.6213 OS03T02468(i |   | TSS4304 | 5.147E-27 |
| chr3 | TCONS_00045463 | XLOC_040535 | 7758584 | 7758918 | + | 1 | NCRNA_7998   | CUFF.8052 NCRNA_799(x  |   | TSS4304 | 3.718E-24 |
| chr3 | TCONS_00045464 | XLOC_040536 | 7759163 | 7759748 | + | 1 | OS03G0246800 | CUFF.8026 OS03T02468(i |   | TSS4304 | 6.112E-73 |

|      |                |             |          |          |   |   |              |           |              |         |           |           |
|------|----------------|-------------|----------|----------|---|---|--------------|-----------|--------------|---------|-----------|-----------|
| chr3 | TCONS_00054565 | XLOC_040537 | 7761409  | 7761693  | + | 1 | OS03G0246800 | CUFF.8054 | OS03T02468(i | TSS4304 | 1.959E-24 |           |
| chr3 | TCONS_00054566 | XLOC_040540 | 7778166  | 7778368  | + | 1 | OS03G0247000 | CUFF.8024 | OS03T02470(i | TSS4304 | 2.869E-25 |           |
| chr3 | TCONS_00054569 | XLOC_040582 | 8094182  | 8094383  | + | 1 | NA           | CUFF.8029 | NA           | u       | TSS4309   | 1.795E-42 |
| chr3 | TCONS_00054566 | XLOC_040596 | 8168959  | 8169202  | + | 1 | OS03G0254700 | CUFF.6238 | OS03T02547(i | TSS4310 | 4.745E-28 |           |
| chr3 | TCONS_00054571 | XLOC_040604 | 8222531  | 8222815  | + | 1 | OS03G0255500 | CUFF.8067 | OS03T02555(i | TSS4311 | 2.303E-41 |           |
| chr3 | TCONS_00054575 | XLOC_040624 | 8441223  | 8441428  | + | 1 | OS03G0260100 | CUFF.8084 | OS03T02601(x | TSS4313 | 2.638E-18 |           |
| chr3 | TCONS_00054588 | XLOC_040636 | 8548133  | 8548337  | + | 1 | OS03G0261900 | CUFF.6233 | OS03T02619(i | TSS4315 | 1.078E-87 |           |
| chr3 | TCONS_00054576 | XLOC_040637 | 8552120  | 8552168  | + | 1 | NA           | CUFF.8066 | NA           | u       | TSS4315   | 9.239E-09 |
| chr3 | TCONS_00054599 | XLOC_040647 | 8581041  | 8581257  | + | 1 | NA           | CUFF.6235 | NA           | u       | TSS4316   | 1.274E-20 |
| chr3 | TCONS_00054601 | XLOC_040649 | 8600031  | 8600238  | + | 1 | NCBP         | CUFF.6240 | OS03T02624(x | TSS4316 | 2.07E-05  |           |
| chr3 | TCONS_00054656 | XLOC_040702 | 8951355  | 8951555  | + | 1 | OS03G0269100 | CUFF.6254 | OS03T02691(i | TSS4322 | 0         |           |
| chr3 | TCONS_00054709 | XLOC_040753 | 9316121  | 9316326  | + | 1 | OS03G0275500 | CUFF.6271 | OS03T02755(i | TSS4327 | 0         |           |
| chr3 | TCONS_00054741 | XLOC_040783 | 9564213  | 9564506  | + | 1 | OS03G0280000 | CUFF.8122 | OS03T02800(i | TSS4330 | 1.206E-27 |           |
| chr3 | TCONS_00054788 | XLOC_040831 | 9848222  | 9848569  | + | 1 | MPK5         | CUFF.6306 | OS03T02858(i | TSS4335 | 0         |           |
| chr3 | TCONS_00054590 | XLOC_040857 | 10040142 | 10040920 | + | 1 | OS03G0289800 | CUFF.8157 | OS03T02898(i | TSS4338 | 2.208E-83 |           |
| chr3 | TCONS_00054591 | XLOC_040858 | 10041611 | 10041881 | + | 1 | OS03G0289800 | CUFF.8158 | OS03T02898(i | TSS4338 | 3E-12     |           |
| chr3 | TCONS_00054593 | XLOC_040862 | 10094477 | 10094757 | + | 1 | OS03G0290500 | CUFF.8152 | OS03T02905(x | TSS4339 | 1.037E-34 |           |
| chr3 | TCONS_00054598 | XLOC_040951 | 10826718 | 10827055 | + | 1 | OS03G0305100 | CUFF.8235 | OS03T03051(i | TSS4349 | 5.592E-20 |           |
| chr3 | TCONS_00054932 | XLOC_040962 | 10868354 | 10868586 | + | 1 | OS03G0306200 | CUFF.8199 | OS03T03062(x | TSS4350 | 0         |           |
| chr3 | TCONS_00054602 | XLOC_040967 | 10871889 | 10872238 | + | 1 | NA           | CUFF.8197 | NA           | u       | TSS4350   | 1.048E-19 |
| chr3 | TCONS_00054606 | XLOC_040988 | 10956848 | 10957195 | + | 1 | OS03G0307800 | CUFF.8212 | OS03T03078(x | TSS4352 | 4.359E-41 |           |
| chr3 | TCONS_00054607 | XLOC_040995 | 11002929 | 11003445 | + | 1 | NA           | CUFF.8208 | NA           | u       | TSS4353   | 0.14978   |
| chr3 | TCONS_00054608 | XLOC_040996 | 11003622 | 11003842 | + | 1 | OS03G0308900 | CUFF.8214 | OS03T03089(x | TSS4353 | 2.542E-23 |           |
| chr3 | TCONS_00054609 | XLOC_041008 | 11085903 | 11086235 | + | 1 | OS03G0310633 | CUFF.8224 | OS03T03106(x | TSS4355 | 0.002878  |           |
| chr3 | TCONS_00046008 | XLOC_041034 | 11281294 | 11281497 | + | 1 | NA           | CUFF.6372 | NA           | u       | TSS4358   | 4.28E-67  |
| chr3 | TCONS_00046055 | XLOC_041085 | 11629130 | 11629355 | + | 1 | NA           | CUFF.6389 | NA           | u       | TSS4363   | 9.195E-12 |
| chr3 | TCONS_00054624 | XLOC_041099 | 11731020 | 11731274 | + | 1 | OS03G0323600 | CUFF.8667 | OS03T03236(x | TSS4365 | 1.855E-47 |           |
| chr3 | TCONS_00054627 | XLOC_041114 | 11847449 | 11847660 | + | 1 | WOX6         | CUFF.8255 | OS03T03256(i | TSS4367 | 1.562E-40 |           |
| chr3 | TCONS_00054629 | XLOC_041120 | 11885734 | 11886062 | + | 1 | NA           | CUFF.8242 | NA           | u       | TSS4367   | 0         |
| chr3 | TCONS_00054630 | XLOC_041122 | 11889497 | 11889816 | + | 1 | NA           | CUFF.8245 | NA           | u       | TSS4367   | 2.654E-11 |
| chr3 | TCONS_00054631 | XLOC_041123 | 11889901 | 11890121 | + | 1 | NA           | CUFF.8244 | NA           | u       | TSS4368   | 0.005791  |
| chr3 | TCONS_00054632 | XLOC_041124 | 11891289 | 11891614 | + | 1 | NA           | CUFF.8251 | NA           | u       | TSS4368   | 0.024257  |
| chr3 | TCONS_00054633 | XLOC_041126 | 11892289 | 11892512 | + | 1 | NA           | CUFF.8247 | NA           | u       | TSS4368   | 2.303E-41 |
| chr3 | TCONS_00046099 | XLOC_041134 | 11956913 | 11957137 | + | 1 | NA           | CUFF.6409 | NA           | u       | TSS4369   | 2.425E-79 |
| chr3 | TCONS_00046102 | XLOC_041137 | 11973433 | 11973670 | + | 1 | NA           | CUFF.6410 | NA           | u       | TSS4369   | 1.974E-08 |

|      |                |             |          |          |   |   |              |                        |         |           |           |
|------|----------------|-------------|----------|----------|---|---|--------------|------------------------|---------|-----------|-----------|
| chr3 | TCONS_00046120 | XLOC_041154 | 12105270 | 12105488 | + | 1 | GLU1         | CUFF.6425 OS03T03295(x | TSS4371 | 5.262E-22 |           |
| chr3 | TCONS_00054639 | XLOC_041155 | 12106145 | 12106346 | + | 1 | GLU1         | CUFF.8270 OS03T03295(i | TSS4371 | 3.249E-27 |           |
| chr3 | TCONS_00046132 | XLOC_041167 | 12221289 | 12221533 | + | 1 | OS03G0331600 | CUFF.6427 OS03T03316(i | TSS4372 | 1.345E-24 |           |
| chr3 | TCONS_00054641 | XLOC_041167 | 12221496 | 12221705 | + | 1 | OS03G0331600 | CUFF.8286 OS03T03316(i | TSS4372 | 2.654E-11 |           |
| chr3 | TCONS_00054642 | XLOC_041190 | 12366347 | 12366701 | + | 1 | NA           | CUFF.8280 NA           | u       | TSS4375   | 9.036E-28 |
| chr3 | TCONS_00054645 | XLOC_041233 | 12618760 | 12619115 | + | 1 | OS03G0339400 | CUFF.8300 OS03T03394(x | TSS4380 | 2.956E-40 |           |
| chr3 | TCONS_00054647 | XLOC_041247 | 12717295 | 12717593 | + | 1 | OS03G0341100 | CUFF.8309 OS03T03411(x | TSS4381 | 0.024257  |           |
| chr3 | TCONS_00046216 | XLOC_041249 | 12721470 | 12721807 | + | 1 | NA           | CUFF.6445 NA           | u       | TSS4381   | 3.386E-18 |
| chr3 | TCONS_00046225 | XLOC_041258 | 12767946 | 12768197 | + | 1 | OS03G0342900 | CUFF.6455 OS03T03429(i | TSS4382 | 0         |           |
| chr3 | TCONS_00046229 | XLOC_041262 | 12800633 | 12800869 | + | 1 | NA           | CUFF.6451 NA           | u       | TSS4383   | 1.594E-22 |
| chr3 | TCONS_00046245 | XLOC_041275 | 12846616 | 12846858 | + | 1 | NA           | CUFF.6454 NA           | u       | TSS4384   | 1.232E-16 |
| chr3 | TCONS_00054656 | XLOC_041310 | 13150236 | 13150446 | + | 1 | NA           | CUFF.8320 NA           | u       | TSS4388   | 9.541E-18 |
| chr3 | TCONS_00054659 | XLOC_041318 | 13168098 | 13168302 | + | 1 | NA           | CUFF.8329 NA           | u       | TSS4389   | 2.576E-38 |
| chr3 | TCONS_00046288 | XLOC_041323 | 13197187 | 13197403 | + | 1 | NA           | CUFF.6475 NA           | u       | TSS4389   | 2.462E-47 |
| chr3 | TCONS_00046336 | XLOC_041371 | 13704372 | 13704573 | + | 1 | NA           | CUFF.6493 NA           | u       | TSS4394   | 0         |
| chr3 | TCONS_00054669 | XLOC_041387 | 13840473 | 13840680 | + | 1 | NA           | CUFF.8363 NA           | u       | TSS4396   | 2.38E-16  |
| chr3 | TCONS_00054670 | XLOC_041388 | 13841248 | 13841496 | + | 1 | NA           | CUFF.8362 NA           | u       | TSS4396   | 0.0003675 |
| chr3 | TCONS_00054671 | XLOC_041389 | 13851114 | 13851329 | + | 1 | OS03G0358000 | CUFF.8368 OS03T03580(i | TSS4396 | 5.01E-43  |           |
| chr3 | TCONS_00046359 | XLOC_041400 | 13942677 | 13943040 | + | 1 | OS03G0359100 | CUFF.6505 OS03T03591(x | TSS4397 | 2.768E-79 |           |
| chr3 | TCONS_00046369 | XLOC_041409 | 14002214 | 14002436 | + | 1 | OS03G0360500 | CUFF.6498 OS03T03605(x | TSS4398 | 4.378E-29 |           |
| chr3 | TCONS_00054678 | XLOC_041475 | 14517532 | 14517943 | + | 1 | OS03G0369800 | CUFF.8399 OS03T03698(i | TSS4405 | 1.739E-22 |           |
| chr3 | TCONS_00054681 | XLOC_041516 | 14852968 | 14853221 | + | 1 | NA           | CUFF.8427 NA           | u       | TSS4409   | 0.30159   |
| chr3 | TCONS_00046680 | XLOC_041702 | 16305719 | 16305937 | + | 1 | SUS1         | CUFF.6661 OS03T04013(x | TSS4429 | 0         |           |
| chr3 | TCONS_00054694 | XLOC_041714 | 16383605 | 16383995 | + | 1 | NA           | CUFF.8489 NA           | u       | TSS4430   | 1.112E-48 |
| chr3 | TCONS_00046728 | XLOC_041751 | 16703627 | 16704004 | + | 1 | OS03G0407050 | CUFF.6634 OS03T04070(i | TSS4434 | 1.389E-48 |           |
| chr3 | TCONS_00046804 | XLOC_041812 | 17209719 | 17209943 | + | 1 | OS03G0415200 | CUFF.8532 OS03T04152(i | TSS4440 | 4.203E-26 |           |
| chr3 | TCONS_00054703 | XLOC_041831 | 17349762 | 17350258 | + | 1 | OS03G0417800 | CUFF.8539 OS03T04178(i | TSS4442 | 0.25215   |           |
| chr3 | TCONS_00054704 | XLOC_041832 | 17379273 | 17379633 | + | 1 | OS03G0417900 | CUFF.8540 OS03T04179(i | TSS4443 | 1.339E-23 |           |
| chr3 | TCONS_00054705 | XLOC_041851 | 17617126 | 17617171 | + | 1 | NA           | CUFF.8542 NA           | u       | TSS4445   | 0.3701    |
| chr3 | TCONS_00054707 | XLOC_041863 | 17707497 | 17708050 | + | 1 | PUB57        | CUFF.8547 OS03T04242(i | TSS4446 | 2.859E-30 |           |
| chr3 | TCONS_00054708 | XLOC_041871 | 17746548 | 17746846 | + | 1 | OS03G0425200 | CUFF.8553 OS03T04252(x | TSS4447 | 7.264E-12 |           |
| chr3 | TCONS_00054711 | XLOC_041910 | 18151600 | 18151806 | + | 1 | NA           | CUFF.8570 NA           | u       | TSS4451   | 4.824E-23 |
| chr3 | TCONS_00054712 | XLOC_041931 | 18454731 | 18455095 | + | 1 | D14L         | CUFF.8591 OS03T04376(i | TSS4453 | 2.542E-23 |           |
| chr3 | TCONS_00054715 | XLOC_041981 | 19185805 | 19186399 | + | 1 | OS03G0448600 | CUFF.8603 OS03T04486(i | TSS4458 | 4.824E-23 |           |
| chr3 | TCONS_00054718 | XLOC_041984 | 19210107 | 19210355 | + | 1 | NA           | CUFF.8600 NA           | u       | TSS4459   | 8.154E-21 |

|      |                |             |          |          |   |   |              |                        |   |         |           |
|------|----------------|-------------|----------|----------|---|---|--------------|------------------------|---|---------|-----------|
| chr3 | TCONS_00054719 | XLOC_041985 | 19211809 | 19212050 | + | 1 | NA           | CUFF.8602 NA           | u | TSS4459 | 4.824E-23 |
| chr3 | TCONS_00054721 | XLOC_042008 | 19521462 | 19521667 | + | 1 | OS03G0454100 | CUFF.8607 OS03T04541(i |   | TSS4461 | 1.25E-16  |
| chr3 | TCONS_00047000 | XLOC_042013 | 19585432 | 19585634 | + | 1 | NA           | CUFF.6679 NA           | u | TSS4461 | 0         |
| chr3 | TCONS_00047001 | XLOC_042014 | 19588273 | 19588611 | + | 1 | OS03G0554900 | CUFF.6686 OS03T05549(x |   | TSS4462 | 0.12416   |
| chr3 | TCONS_00054724 | XLOC_042016 | 19589658 | 19589893 | + | 1 | NA           | CUFF.8616 NA           | u | TSS4462 | 1.187E-36 |
| chr3 | TCONS_00054728 | XLOC_042022 | 19594513 | 19594918 | + | 1 | NA           | CUFF.8611 NA           | u | TSS4463 | 0.0035937 |
| chr3 | TCONS_00054731 | XLOC_042026 | 19600121 | 19600659 | + | 1 | NA           | CUFF.8612 NA           | u | TSS4463 | 1.205E-44 |
| chr3 | TCONS_00054734 | XLOC_042037 | 19866422 | 19866710 | + | 1 | NA           | CUFF.8620 NA           | u | TSS4464 | 6.994E-29 |
| chr3 | TCONS_00047023 | XLOC_042044 | 19945221 | 19945534 | + | 1 | NA           | CUFF.6689 NA           | u | TSS4465 | 4.697E-49 |
| chr3 | TCONS_00047032 | XLOC_042053 | 20212944 | 20213173 | + | 1 | NA           | CUFF.6692 NA           | u | TSS4466 | 6.512E-29 |
| chr3 | TCONS_00047042 | XLOC_042066 | 20324531 | 20324765 | + | 1 | NA           | CUFF.6694 NA           | u | TSS4467 | 2.178E-23 |
| chr3 | TCONS_00047043 | XLOC_042067 | 20362307 | 20362510 | + | 1 | NA           | CUFF.6696 NA           | u | TSS4467 | 0         |
| chr3 | TCONS_00047051 | XLOC_042076 | 20424004 | 20424214 | + | 1 | OS03G0565600 | CUFF.6701 OS03T05656(i |   | TSS4468 | 1.012E-65 |
| chr3 | TCONS_00054740 | XLOC_042077 | 20424290 | 20424813 | + | 1 | OS03G0565600 | CUFF.8638 OS03T05656(i |   | TSS4468 | 1.501E-13 |
| chr3 | TCONS_00047080 | XLOC_042107 | 20679598 | 20679811 | + | 1 | OS03G0570200 | CUFF.6709 OS03T05702(i |   | TSS4471 | 3.926E-57 |
| chr3 | TCONS_00054744 | XLOC_042110 | 20686250 | 20686515 | + | 1 | NA           | CUFF.8643 NA           | u | TSS4472 | 1.654E-63 |
| chr3 | TCONS_00047087 | XLOC_042116 | 20745561 | 20745790 | + | 1 | OS03G0570800 | CUFF.6722 OS03T05708(i |   | TSS4472 | 1.827E-30 |
| chr3 | TCONS_00054746 | XLOC_042122 | 20797840 | 20798162 | + | 1 | OS03G0571900 | CUFF.8662 OS03T05719(x |   | TSS4473 | 2.217E-31 |
| chr3 | TCONS_00054749 | XLOC_042130 | 20874214 | 20874536 | + | 1 | OS03G0572900 | CUFF.8665 OS03T05729(x |   | TSS4474 | 2.863E-13 |
| chr3 | TCONS_00054751 | XLOC_042143 | 21064804 | 21065104 | + | 1 | OS03G0576200 | CUFF.8663 OS03T05762(x |   | TSS4475 | 0         |
| chr3 | TCONS_00047126 | XLOC_042153 | 21099078 | 21099288 | + | 1 | OS03G0577000 | CUFF.8679 OS03T05770(i |   | TSS4477 | 0         |
| chr3 | TCONS_00047166 | XLOC_042190 | 21513166 | 21513385 | + | 1 | DCL2A        | CUFF.6748 OS03T05839(i |   | TSS4481 | 3.192E-33 |
| chr3 | TCONS_00047213 | XLOC_042235 | 22024101 | 22024309 | + | 1 | OS03G0593200 | CUFF.6745 OS03T05932(i |   | TSS4485 | 0         |
| chr3 | TCONS_00047228 | XLOC_042252 | 22166568 | 22166777 | + | 1 | OS03G0595800 | CUFF.6743 OS03T05958(i |   | TSS4487 | 1.688E-31 |
| chr3 | TCONS_00054760 | XLOC_042255 | 22169630 | 22169891 | + | 1 | OS03G0595800 | CUFF.8690 OS03T05958(x |   | TSS4487 | 9.09E-07  |
| chr3 | TCONS_00054761 | XLOC_042261 | 22224292 | 22225007 | + | 1 | OS03G0596900 | CUFF.8696 OS03T05969(i |   | TSS4488 | 2.02E-19  |
| chr3 | TCONS_00047236 | XLOC_042263 | 22248200 | 22248413 | + | 1 | NA           | CUFF.6741 NA           | u | TSS4488 | 7.06E-28  |
| chr3 | TCONS_00047258 | XLOC_042286 | 22382974 | 22383324 | + | 1 | UAM1         | CUFF.6775 OS03T05998(i |   | TSS4491 | 5.004E-53 |
| chr3 | TCONS_00054770 | XLOC_042326 | 22728157 | 22728363 | + | 1 | NA           | CUFF.8715 NA           | u | TSS4495 | 4.824E-23 |
| chr3 | TCONS_00047350 | XLOC_042385 | 23381304 | 23381337 | + | 1 | NA           | CUFF.6772 NA           | u | TSS4501 | 0.0077427 |
| chr3 | TCONS_00054779 | XLOC_042385 | 23382277 | 23382518 | + | 1 | NA           | CUFF.8734 NA           | u | TSS4501 | 1.326E-28 |
| chr3 | TCONS_00054780 | XLOC_042386 | 23383050 | 23383252 | + | 1 | NA           | CUFF.8733 NA           | u | TSS4501 | 2.943E-20 |
| chr3 | TCONS_00047390 | XLOC_042424 | 23626148 | 23626731 | + | 1 | OS03G0622500 | CUFF.6819 OS03T06225(i |   | TSS4505 | 1.386E-10 |
| chr3 | TCONS_00047407 | XLOC_042439 | 23789506 | 23789730 | + | 1 | NA           | CUFF.6787 NA           | u | TSS4507 | 0         |
| chr3 | TCONS_00054792 | XLOC_042449 | 23806797 | 23807080 | + | 1 | OS03G0625700 | CUFF.8766 OS03T06257(i |   | TSS4508 | 1.508E-30 |

|      |                |             |          |          |   |   |              |                        |         |           |
|------|----------------|-------------|----------|----------|---|---|--------------|------------------------|---------|-----------|
| chr3 | TCONS_00054794 | XLOC_042461 | 23873675 | 23873990 | + | 1 | OS03G0626700 | CUFF.8771 OS03T06267(i | TSS4509 | 1.748E-37 |
| chr3 | TCONS_00054800 | XLOC_042510 | 24430364 | 24431557 | + | 1 | NA           | CUFF.8796 NA u         | TSS4514 | 2.605E-16 |
| chr3 | TCONS_00047499 | XLOC_042527 | 24575195 | 24575468 | + | 1 | LOL3         | CUFF.6836 OS03T06396(x | TSS4516 | 0         |
| chr3 | TCONS_00054801 | XLOC_042540 | 24695529 | 24695733 | + | 1 | OS03G0641250 | CUFF.8820 OS03T06412(i | TSS4517 | 2.542E-23 |
| chr3 | TCONS_00054802 | XLOC_042541 | 24701201 | 24701430 | + | 1 | NA           | CUFF.8816 NA u         | TSS4517 | 1.118E-62 |
| chr3 | TCONS_00047512 | XLOC_042542 | 24702254 | 24702516 | + | 1 | NA           | CUFF.6835 NA u         | TSS4517 | 2.373E-22 |
| chr3 | TCONS_00054803 | XLOC_042542 | 24702370 | 24703402 | + | 1 | NA           | CUFF.8818 NA u         | TSS4518 | 2.02E-19  |
| chr3 | TCONS_00047521 | XLOC_042552 | 24780947 | 24781167 | + | 1 | OS03G0642900 | CUFF.6843 OS03T06429(x | TSS4519 | 1.441E-28 |
| chr3 | TCONS_00054806 | XLOC_042557 | 24817170 | 24817577 | + | 1 | OAT          | CUFF.8836 OS03T06433(i | TSS4519 | 1.339E-23 |
| chr3 | TCONS_00054813 | XLOC_042584 | 25045982 | 25046239 | + | 1 | NA           | CUFF.8838 NA u         | TSS4522 | 0.0039719 |
| chr3 | TCONS_00047554 | XLOC_042588 | 25048106 | 25048352 | + | 1 | NA           | CUFF.6851 NA u         | TSS4523 | 2.962E-08 |
| chr3 | TCONS_00054817 | XLOC_042600 | 25096158 | 25096398 | + | 1 | OS03G0647800 | CUFF.8852 OS03T06478(i | TSS4524 | 5.979E-50 |
| chr3 | TCONS_00047606 | XLOC_042635 | 25299885 | 25300101 | + | 1 | OS03G0651300 | CUFF.6863 OS03T06513(x | TSS4527 | 3.132E-05 |
| chr3 | TCONS_00047675 | XLOC_042698 | 25854045 | 25854259 | + | 1 | OS03G0659900 | CUFF.6884 OS03T06599(i | TSS4534 | 0         |
| chr3 | TCONS_00054824 | XLOC_042701 | 25865977 | 25866184 | + | 1 | NA           | CUFF.8890 NA u         | TSS4535 | 5.016E-18 |
| chr3 | TCONS_00054829 | XLOC_042770 | 26299065 | 26299265 | + | 1 | NA           | CUFF.8905 NA u         | TSS4542 | 3.301E-22 |
| chr3 | TCONS_00054830 | XLOC_042771 | 26308591 | 26308830 | + | 1 | OS03G0667800 | CUFF.8906 OS03T06678(x | TSS4542 | 4.791E-33 |
| chr3 | TCONS_00054834 | XLOC_042806 | 26555748 | 26556006 | + | 1 | NA           | CUFF.8925 NA u         | TSS4546 | 9.863E-61 |
| chr3 | TCONS_00054837 | XLOC_042848 | 26899431 | 26899632 | + | 1 | NA           | CUFF.8938 NA u         | TSS4550 | 1.387E-18 |
| chr3 | TCONS_00047862 | XLOC_042877 | 27113886 | 27114106 | + | 1 | OS03G0681400 | CUFF.6937 OS03T06814(i | TSS4553 | 0         |
| chr3 | TCONS_00054840 | XLOC_042881 | 27137599 | 27137908 | + | 1 | OS03G0681900 | CUFF.8961 OS03T06819(i | TSS4554 | 2.02E-19  |
| chr3 | TCONS_00047869 | XLOC_042884 | 27164915 | 27165117 | + | 1 | NA           | CUFF.6933 NA u         | TSS4554 | 0         |
| chr3 | TCONS_00054843 | XLOC_042941 | 27545804 | 27546113 | + | 1 | NA           | CUFF.8977 NA u         | TSS4560 | 6.64E-47  |
| chr3 | TCONS_00047947 | XLOC_042959 | 27765274 | 27765494 | + | 1 | OS03G0693400 | CUFF.6963 OS03T06934(i | TSS4562 | 5.596E-36 |
| chr3 | TCONS_00054847 | XLOC_042984 | 27989303 | 27989520 | + | 1 | NA           | CUFF.9007 NA u         | TSS4565 | 5.912E-63 |
| chr3 | TCONS_00054851 | XLOC_042995 | 28067703 | 28067908 | + | 1 | NA           | CUFF.9013 NA u         | TSS4566 | 5.418E-30 |
| chr3 | TCONS_00054853 | XLOC_043006 | 28163869 | 28164111 | + | 1 | OS03G0701550 | CUFF.9022 OS03T07015(x | TSS4567 | 5.592E-20 |
| chr3 | TCONS_00047999 | XLOC_043008 | 28170985 | 28171206 | + | 1 | OS03G0701700 | CUFF.6984 OS03T07017(x | TSS4568 | 1.503E-65 |
| chr3 | TCONS_00048013 | XLOC_043019 | 28272333 | 28272547 | + | 1 | OS03G0703400 | CUFF.6988 OS03T07034(x | TSS4569 | 0         |
| chr3 | TCONS_00054855 | XLOC_043020 | 28273031 | 28273365 | + | 1 | NCRNA_3019   | CUFF.9035 NCRNA_301(x  | TSS4569 | 4.786E-48 |
| chr3 | TCONS_00048033 | XLOC_043040 | 28447943 | 28448172 | + | 1 | NA           | CUFF.6987 NA u         | TSS4571 | 3.698E-13 |
| chr3 | TCONS_00054857 | XLOC_043041 | 28454598 | 28455065 | + | 1 | OS03G0706900 | CUFF.9037 OS03T07069(x | TSS4571 | 8.51E-46  |
| chr3 | TCONS_00054858 | XLOC_043045 | 28479091 | 28479448 | + | 1 | OS03G0707300 | CUFF.9038 OS03T07073(x | TSS4572 | 8.155E-21 |
| chr3 | TCONS_00048046 | XLOC_043055 | 28575154 | 28575598 | + | 1 | OS03G0708700 | CUFF.6995 OS03T07087(x | TSS4573 | 2.826E-20 |
| chr3 | TCONS_00054860 | XLOC_043056 | 28576187 | 28576690 | + | 1 | NA           | CUFF.9039 NA u         | TSS4573 | 1.339E-23 |



|      |                |             |          |          |   |   |              |                        |         |           |           |
|------|----------------|-------------|----------|----------|---|---|--------------|------------------------|---------|-----------|-----------|
| chr3 | TCONS_00048054 | XLOC_043064 | 28605480 | 28605799 | + | 1 | OS03G0709300 | CUFF.7003 OS03T07093(i | TSS4574 | 1.051E-29 |           |
| chr3 | TCONS_00054869 | XLOC_043085 | 28723734 | 28724044 | + | 1 | OS03G0711400 | CUFF.9077 OS03T07114(x | TSS4576 | 3.453E-17 |           |
| chr3 | TCONS_00054871 | XLOC_043126 | 29019516 | 29019840 | + | 1 | OS03G0717000 | CUFF.9070 OS03T07170(i | TSS4580 | 3.129E-15 |           |
| chr3 | TCONS_00048128 | XLOC_043137 | 29080044 | 29080277 | + | 1 | NA           | CUFF.7015 NA           | u       | TSS4582   | 2.943E-29 |
| chr3 | TCONS_00054875 | XLOC_043150 | 29175240 | 29175445 | + | 1 | PHYA         | CUFF.9104 OS03T07198(i | TSS4583 | 1.17E-31  |           |
| chr3 | TCONS_00054878 | XLOC_043186 | 29448902 | 29449173 | + | 1 | OS03G0724500 | CUFF.9113 OS03T07245(i | TSS4587 | 8.061E-36 |           |
| chr3 | TCONS_00048200 | XLOC_043202 | 29563400 | 29563630 | + | 1 | OS03G0726500 | CUFF.7053 OS03T07265(i | TSS4589 | 2.826E-20 |           |
| chr3 | TCONS_00054881 | XLOC_043211 | 29714729 | 29714980 | + | 1 | OS03G0727900 | CUFF.9148 OS03T07279(i | TSS4590 | 4.359E-41 |           |
| chr3 | TCONS_00054882 | XLOC_043217 | 29759516 | 29759718 | + | 1 | NA           | CUFF.9130 NA           | u       | TSS4590   | 1.339E-23 |
| chr3 | TCONS_00048245 | XLOC_043247 | 29973337 | 29973539 | + | 1 | OS03G0732000 | CUFF.7069 OS03T07320(i | TSS4593 | 1.402E-66 |           |
| chr3 | TCONS_00054884 | XLOC_043262 | 30061505 | 30061708 | + | 1 | NA           | CUFF.9143 NA           | u       | TSS4595   | 2.638E-18 |
| chr3 | TCONS_00054885 | XLOC_043263 | 30065042 | 30065249 | + | 1 | OS03G0733800 | CUFF.9161 OS03T07338(i | TSS4595 | 4.824E-23 |           |
| chr3 | TCONS_00054886 | XLOC_043264 | 30065380 | 30065592 | + | 1 | OS03G0733800 | CUFF.9166 OS03T07338(i | TSS4595 | 0.005791  |           |
| chr3 | TCONS_00054890 | XLOC_043280 | 30165715 | 30165929 | + | 1 | OS03G0736000 | CUFF.9175 OS03T07360(i | TSS4597 | 1.739E-22 |           |
| chr3 | TCONS_00048287 | XLOC_043298 | 30245688 | 30245906 | + | 1 | OS03G0737701 | CUFF.7088 OS03T07377(x | TSS4599 | 3.909E-32 |           |
| chr3 | TCONS_00054895 | XLOC_043324 | 30440197 | 30440475 | + | 1 | OS03G0741700 | CUFF.9185 OS03T07417(x | TSS4602 | 1.335E-33 |           |
| chr3 | TCONS_00048321 | XLOC_043329 | 30456704 | 30456904 | + | 1 | NA           | CUFF.7099 NA           | u       | TSS4602   | 0         |
| chr3 | TCONS_00048338 | XLOC_043349 | 30553442 | 30553673 | + | 1 | NA           | CUFF.7104 NA           | u       | TSS4604   | 1.167E-21 |
| chr3 | TCONS_00048344 | XLOC_043355 | 30567530 | 30567875 | + | 1 | NA           | CUFF.7109 NA           | u       | TSS4605   | 0.029675  |
| chr3 | TCONS_00048346 | XLOC_043357 | 30569014 | 30570309 | + | 1 | NA           | CUFF.7119 NA           | u       | TSS4605   | 0         |
| chr3 | TCONS_00048348 | XLOC_043358 | 30571101 | 30571595 | + | 1 | NA           | CUFF.7115 NA           | u       | TSS4605   | 0         |
| chr3 | TCONS_00054909 | XLOC_043358 | 30570430 | 30571334 | + | 1 | NA           | CUFF.9203 NA           | u       | TSS4605   | 2.419E-38 |
| chr3 | TCONS_00048349 | XLOC_043359 | 30571676 | 30572367 | + | 1 | NA           | CUFF.7114 NA           | u       | TSS4606   | 8.318E-05 |
| chr3 | TCONS_00054912 | XLOC_043359 | 30572346 | 30572698 | + | 1 | NA           | CUFF.9199 NA           | u       | TSS4606   | 1.904E-38 |
| chr3 | TCONS_00054915 | XLOC_043362 | 30574156 | 30574463 | + | 1 | NA           | CUFF.9202 NA           | u       | TSS4606   | 2.972E-16 |
| chr3 | TCONS_00054916 | XLOC_043364 | 30581218 | 30581675 | + | 1 | OS03G0744675 | CUFF.9221 OS03T07446(i | TSS4606 | 3.414E-08 |           |
| chr3 | TCONS_00054920 | XLOC_043381 | 30732333 | 30732617 | + | 1 | NA           | CUFF.9211 NA           | u       | TSS4608   | 0.030927  |
| chr3 | TCONS_00048408 | XLOC_043417 | 30941666 | 30941891 | + | 1 | ADA2         | CUFF.7150 OS03T07508(x | TSS4612 | 5.553E-31 |           |
| chr3 | TCONS_00048442 | XLOC_043447 | 31183965 | 31184221 | + | 1 | NCRNA_5492   | CUFF.7168 NCRNA_549(x  | TSS4615 | 0.01177   |           |
| chr3 | TCONS_00054926 | XLOC_043449 | 31189240 | 31190198 | + | 1 | OS03G0755700 | CUFF.9813 OS03T07557(x | TSS4615 | 1.859E-10 |           |
| chr3 | TCONS_00048466 | XLOC_043470 | 31321830 | 31322084 | + | 1 | NA           | CUFF.7160 NA           | u       | TSS4618   | 1.233E-12 |
| chr3 | TCONS_00048468 | XLOC_043472 | 31323188 | 31323438 | + | 1 | OS03G0758000 | CUFF.7162 OS03T07580(x | TSS4618 | 0.0003675 |           |
| chr3 | TCONS_00048480 | XLOC_043485 | 31402103 | 31402424 | + | 1 | NA           | CUFF.7169 NA           | u       | TSS4619   | 0.74128   |
| chr3 | TCONS_00054933 | XLOC_043537 | 31696040 | 31696291 | + | 1 | OS03G0765400 | CUFF.9290 OS03T07654(i | TSS4625 | 4.872E-56 |           |
| chr3 | TCONS_00054935 | XLOC_043552 | 31776701 | 31776901 | + | 1 | NA           | CUFF.9280 NA           | u       | TSS4626   | 1.549E-20 |

|      |                |             |          |          |   |   |              |           |              |   |         |           |
|------|----------------|-------------|----------|----------|---|---|--------------|-----------|--------------|---|---------|-----------|
| chr3 | TCONS_00054937 | XLOC_043557 | 31809506 | 31809797 | + | 1 | NA           | CUFF.9283 | NA           | u | TSS4627 | 1.518E-37 |
| chr3 | TCONS_00048551 | XLOC_043558 | 31810542 | 31810757 | + | 1 | NA           | CUFF.7190 | NA           | u | TSS4627 | 2.882E-67 |
| chr3 | TCONS_00048591 | XLOC_043596 | 32045789 | 32046192 | + | 1 | OS03G0773300 | CUFF.7214 | OS03T07733(x |   | TSS4631 | 2.456E-75 |
| chr3 | TCONS_00054947 | XLOC_043686 | 32714820 | 32715038 | + | 1 | NA           | CUFF.9355 | NA           | u | TSS4641 | 8.626E-16 |
| chr3 | TCONS_00048719 | XLOC_043714 | 32885775 | 32885999 | + | 1 | OS03G0790900 | CUFF.7269 | OS03T07909(i |   | TSS4644 | 4.079E-25 |
| chr3 | TCONS_00054951 | XLOC_043719 | 32913520 | 32913779 | + | 1 | OS03G0791500 | CUFF.9368 | OS03T07915(x |   | TSS4644 | 7.393E-44 |
| chr3 | TCONS_00048729 | XLOC_043726 | 32934335 | 32934557 | + | 1 | OS03G0791800 | CUFF.7262 | OS03T07918(x |   | TSS4645 | 0         |
| chr3 | TCONS_00048756 | XLOC_043753 | 33068117 | 33068359 | + | 1 | OS03G0795000 | CUFF.7270 | OS03T07950(x |   | TSS4648 | 1.274E-20 |
| chr3 | TCONS_00054958 | XLOC_043755 | 33083649 | 33083855 | + | 1 | NA           | CUFF.9381 | NA           | u | TSS4648 | 4.824E-23 |
| chr3 | TCONS_00054961 | XLOC_043808 | 33392348 | 33392604 | + | 1 | OS03G0800700 | CUFF.9403 | OS03T08007(i |   | TSS4654 | 2.248E-36 |
| chr3 | TCONS_00048835 | XLOC_043834 | 33502423 | 33502670 | + | 1 | OS03G0802900 | CUFF.7283 | OS03T08029(x |   | TSS4656 | 1.238E-25 |
| chr3 | TCONS_00054967 | XLOC_043839 | 33520061 | 33520384 | + | 1 | OS03G0803300 | CUFF.9421 | OS03T08033(x |   | TSS4657 | 4.189E-11 |
| chr3 | TCONS_00048844 | XLOC_043843 | 33529691 | 33529897 | + | 1 | NA           | CUFF.7291 | NA           | u | TSS4657 | 0         |
| chr3 | TCONS_00054971 | XLOC_043845 | 33534839 | 33535451 | + | 1 | NA           | CUFF.9423 | NA           | u | TSS4658 | 8.155E-21 |
| chr3 | TCONS_00054973 | XLOC_043847 | 33537187 | 33538049 | + | 1 | NA           | CUFF.9424 | NA           | u | TSS4658 | 1.339E-23 |
| chr3 | TCONS_00054975 | XLOC_043849 | 33538618 | 33538839 | + | 1 | NA           | CUFF.9433 | NA           | u | TSS4658 | 3.721E-34 |
| chr3 | TCONS_00048948 | XLOC_043952 | 34215059 | 34215287 | + | 1 | NA           | CUFF.7314 | NA           | u | TSS4669 | 7.436E-14 |
| chr3 | TCONS_00054983 | XLOC_043956 | 34224058 | 34224333 | + | 1 | NA           | CUFF.9448 | NA           | u | TSS4669 | 1.02E-52  |
| chr3 | TCONS_00049000 | XLOC_044001 | 34474117 | 34474325 | + | 1 | NA           | CUFF.7329 | NA           | u | TSS4674 | 1.703E-36 |
| chr3 | TCONS_00049010 | XLOC_044010 | 34528357 | 34528597 | + | 1 | OS03G0822200 | CUFF.7340 | OS03T08222(i |   | TSS4675 | 1.561E-32 |
| chr3 | TCONS_00054990 | XLOC_044028 | 34608116 | 34608324 | + | 1 | OS03G0824000 | CUFF.9478 | OS03T08240(x |   | TSS4677 | 2.26E-21  |
| chr3 | TCONS_00049037 | XLOC_044039 | 34670390 | 34670593 | + | 1 | OS03G0825400 | CUFF.7341 | OS03T08254(i |   | TSS4678 | 0         |
| chr3 | TCONS_00054993 | XLOC_044071 | 34870248 | 34870682 | + | 1 | OS03G0830200 | CUFF.9490 | OS03T08302(x |   | TSS4682 | 1.501E-13 |
| chr3 | TCONS_00054998 | XLOC_044094 | 34994758 | 34995128 | + | 1 | OS03G0832900 | CUFF.9502 | OS03T08329(x |   | TSS4684 | 7.956E-14 |
| chr3 | TCONS_00055003 | XLOC_044101 | 35013696 | 35013959 | + | 1 | SPL6         | CUFF.9509 | OS03T08333(i |   | TSS4685 | 3.721E-34 |
| chr3 | TCONS_00055006 | XLOC_044118 | 35097611 | 35098072 | + | 1 | NCRNA_5249   | CUFF.9508 | NCRNA_5249(x |   | TSS4687 | 4.293E-21 |
| chr3 | TCONS_00055008 | XLOC_044126 | 35133859 | 35134100 | + | 1 | NA           | CUFF.9511 | NA           | u | TSS4688 | 5.596E-40 |
| chr3 | TCONS_00049152 | XLOC_044148 | 35257876 | 35258204 | + | 1 | OS03G0839000 | CUFF.7376 | OS03T08390(i |   | TSS4690 | 7.226E-54 |
| chr3 | TCONS_00055011 | XLOC_044151 | 35262195 | 35262582 | + | 1 | OS03G0839100 | CUFF.9531 | OS03T08391(i |   | TSS4690 | 5.961E-15 |
| chr3 | TCONS_00049158 | XLOC_044155 | 35306306 | 35306544 | + | 1 | NA           | CUFF.7375 | NA           | u | TSS4691 | 2.373E-22 |
| chr3 | TCONS_00055016 | XLOC_044161 | 35347875 | 35348303 | + | 1 | NA           | CUFF.9527 | NA           | u | TSS4691 | 7.264E-12 |
| chr3 | TCONS_00055017 | XLOC_044163 | 35381209 | 35381531 | + | 1 | OS03G0841600 | CUFF.9540 | OS03T08416(x |   | TSS4691 | 9.09E-07  |
| chr3 | TCONS_00049161 | XLOC_044164 | 35382425 | 35382667 | + | 1 | NA           | CUFF.7381 | NA           | u | TSS4691 | 1.232E-16 |
| chr3 | TCONS_00049175 | XLOC_044179 | 35433835 | 35434055 | + | 1 | OS03G0843100 | CUFF.7387 | OS03T08431(x |   | TSS4693 | 0         |
| chr3 | TCONS_00049193 | XLOC_044194 | 35555956 | 35556179 | + | 1 | OS03G0845500 | CUFF.7392 | OS03T08455(x |   | TSS4695 | 1.463E-38 |

|      |                |             |          |          |   |   |              |                        |         |           |
|------|----------------|-------------|----------|----------|---|---|--------------|------------------------|---------|-----------|
| chr3 | TCONS_00055033 | XLOC_044280 | 36193595 | 36193806 | + | 1 | OS03G0857750 | CUFF.9582 OS03T08577(x | TSS4704 | 9.158E-23 |
| chr3 | TCONS_00049287 | XLOC_044284 | 36212356 | 36212575 | + | 1 | NA           | CUFF.7414 NA u         | TSS4705 | 1.979E-29 |
| chr3 | TCONS_00049293 | XLOC_044289 | 36244960 | 36245287 | + | 1 | OS03G0858700 | CUFF.7419 OS03T08587(x | TSS4705 | 1.746E-39 |
| chr3 | TCONS_00049330 | XLOC_044327 | 83195    | 83431    | - | 1 | NA           | CUFF.5782 NA u         | TSS4709 | 0         |
| chr3 | TCONS_00055045 | XLOC_044328 | 84010    | 84214    | - | 1 | OS03G0100500 | CUFF.7457 OS03T01005(x | TSS4709 | 9.952E-87 |
| chr3 | TCONS_00055049 | XLOC_044354 | 264395   | 264990   | - | 1 | OS03G0103700 | CUFF.7472 OS03T01037(x | TSS4712 | 0.17714   |
| chr3 | TCONS_00055050 | XLOC_044355 | 265383   | 265776   | - | 1 | NA           | CUFF.7466 NA u         | TSS4712 | 0.0007261 |
| chr3 | TCONS_00049356 | XLOC_044357 | 266153   | 266530   | - | 1 | NA           | CUFF.5787 NA u         | TSS4713 | 5.54E-17  |
| chr3 | TCONS_00055052 | XLOC_044357 | 266092   | 266320   | - | 1 | NA           | CUFF.7470 NA u         | TSS4712 | 1.501E-13 |
| chr3 | TCONS_00055053 | XLOC_044357 | 266492   | 266944   | - | 1 | NA           | CUFF.7468 NA u         | TSS4713 | 2.351E-34 |
| chr3 | TCONS_00049385 | XLOC_044383 | 445245   | 445890   | - | 1 | NA           | CUFF.5795 NA u         | TSS4716 | 0.0016092 |
| chr3 | TCONS_00055055 | XLOC_044383 | 445065   | 445279   | - | 1 | NA           | CUFF.7485 NA u         | TSS4715 | 2.165E-14 |
| chr3 | TCONS_00055058 | XLOC_044385 | 447110   | 447439   | - | 1 | NA           | CUFF.7479 NA u         | TSS4716 | 0.0001868 |
| chr3 | TCONS_00049420 | XLOC_044416 | 599968   | 600169   | - | 1 | NA           | CUFF.5804 NA u         | TSS4719 | 0         |
| chr3 | TCONS_00049433 | XLOC_044433 | 702200   | 702418   | - | 1 | OS03G0112101 | CUFF.5813 OS03T01121(x | TSS4721 | 6.776E-44 |
| chr3 | TCONS_00055067 | XLOC_044433 | 702331   | 702633   | - | 1 | OS03G0112101 | CUFF.7512 OS03T01121(i | TSS4721 | 1.965E-34 |
| chr3 | TCONS_00055069 | XLOC_044438 | 707334   | 707667   | - | 1 | OS03G0112400 | CUFF.7515 OS03T01124(i | TSS4722 | 3.718E-24 |
| chr3 | TCONS_00055071 | XLOC_044440 | 712331   | 712545   | - | 1 | NA           | CUFF.7502 NA u         | TSS4722 | 1.335E-33 |
| chr3 | TCONS_00055072 | XLOC_044441 | 713065   | 713717   | - | 1 | NA           | CUFF.7504 NA u         | TSS4722 | 2.624E-17 |
| chr3 | TCONS_00055073 | XLOC_044442 | 715044   | 715249   | - | 1 | NA           | CUFF.7510 NA u         | TSS4722 | 2.981E-58 |
| chr3 | TCONS_00055074 | XLOC_044444 | 716762   | 717658   | - | 1 | NA           | CUFF.7507 NA u         | TSS4722 | 1.44E-07  |
| chr3 | TCONS_00049449 | XLOC_044455 | 777192   | 777413   | - | 1 | NA           | CUFF.5818 NA u         | TSS4723 | 7.859E-42 |
| chr3 | TCONS_00049470 | XLOC_044476 | 923591   | 924013   | - | 1 | OS03G0116300 | CUFF.5841 OS03T01163(i | TSS4726 | 0         |
| chr3 | TCONS_00055079 | XLOC_044476 | 923512   | 923784   | - | 1 | OS03G0116300 | CUFF.7526 OS03T01163(i | TSS4726 | 6.174E-32 |
| chr3 | TCONS_00049492 | XLOC_044499 | 1055192  | 1055418  | - | 1 | NA           | CUFF.5831 NA u         | TSS4728 | 3.46E-27  |
| chr3 | TCONS_00049495 | XLOC_044504 | 1058908  | 1059166  | - | 1 | NA           | CUFF.5846 NA u         | TSS4729 | 3.723E-69 |
| chr3 | TCONS_00055091 | XLOC_044513 | 1066290  | 1066577  | - | 1 | NA           | CUFF.7550 NA u         | TSS4730 | 0.60661   |
| chr3 | TCONS_00055092 | XLOC_044514 | 1066755  | 1066985  | - | 1 | NA           | CUFF.7554 NA u         | TSS4730 | 6.604E-06 |
| chr3 | TCONS_00049526 | XLOC_044538 | 1219375  | 1219727  | - | 1 | NA           | CUFF.5854 NA u         | TSS4733 | 6.272E-20 |
| chr3 | TCONS_00049539 | XLOC_044551 | 1356469  | 1356782  | - | 1 | OS03G0123800 | CUFF.5859 OS03T01238(x | TSS4734 | 7.002E-10 |
| chr3 | TCONS_00055101 | XLOC_044588 | 1628566  | 1628867  | - | 1 | OS03G0128700 | CUFF.7620 OS03T01287(i | TSS4738 | 2.38E-16  |
| chr3 | TCONS_00049604 | XLOC_044610 | 1753600  | 1753813  | - | 1 | OS03G0130800 | CUFF.5887 OS03T01308(i | TSS4741 | 2.074E-19 |
| chr3 | TCONS_00055108 | XLOC_044621 | 1833329  | 1833536  | - | 1 | NA           | CUFF.7622 NA u         | TSS4742 | 1.136E-14 |
| chr3 | TCONS_00049649 | XLOC_044655 | 2063530  | 2063770  | - | 1 | NA           | CUFF.5905 NA u         | TSS4745 | 1.738E-21 |
| chr3 | TCONS_00055112 | XLOC_044664 | 2144095  | 2144868  | - | 1 | OS03G0139100 | CUFF.7673 OS03T01391(i | TSS4746 | 2.844E-70 |

|      |                |             |         |         |   |   |              |           |              |         |           |           |
|------|----------------|-------------|---------|---------|---|---|--------------|-----------|--------------|---------|-----------|-----------|
| chr3 | TCONS_00049667 | XLOC_044673 | 2249910 | 2250222 | - | 1 | OS03G0140700 | CUFF.5910 | OS03T01407(x | TSS4747 | 4.923E-65 |           |
| chr3 | TCONS_00049670 | XLOC_044676 | 2274439 | 2274665 | - | 1 | OS03G0141200 | CUFF.5911 | OS03T01412(i | TSS4748 | 2.98E-24  |           |
| chr3 | TCONS_00049672 | XLOC_044678 | 2337797 | 2338018 | - | 1 | OS03G0142500 | CUFF.7647 | OS03T01425(i | TSS4748 | 4.766E-28 |           |
| chr3 | TCONS_00055115 | XLOC_044679 | 2338504 | 2338712 | - | 1 | OS03G0142500 | CUFF.7649 | OS03T01425(i | TSS4748 | 9.725E-74 |           |
| chr3 | TCONS_00055116 | XLOC_044686 | 2394448 | 2394667 | - | 1 | OS03G0143200 | CUFF.7645 | OS03T01432(x | TSS4749 | 1.168E-26 |           |
| chr3 | TCONS_00055121 | XLOC_044708 | 2490188 | 2490437 | - | 1 | NA           | CUFF.7656 | NA           | u       | TSS4751   | 1.508E-30 |
| chr3 | TCONS_00055122 | XLOC_044716 | 2537973 | 2538309 | - | 1 | NA           | CUFF.7658 | NA           | u       | TSS4752   | 3.721E-34 |
| chr3 | TCONS_00055131 | XLOC_044748 | 2639303 | 2639514 | - | 1 | NA           | CUFF.7682 | NA           | u       | TSS4755   | 9.158E-23 |
| chr3 | TCONS_00055132 | XLOC_044749 | 2639766 | 2639977 | - | 1 | NA           | CUFF.7681 | NA           | u       | TSS4755   | 3.718E-24 |
| chr3 | TCONS_00055135 | XLOC_044774 | 2836332 | 2836596 | - | 1 | OS03G0151300 | CUFF.7696 | OS03T01513(i | TSS4758 | 5.104E-61 |           |
| chr3 | TCONS_00055136 | XLOC_044776 | 2838410 | 2838801 | - | 1 | NA           | CUFF.7691 | NA           | u       | TSS4758   | 1.361E-38 |
| chr3 | TCONS_00049809 | XLOC_044827 | 3092495 | 3092702 | - | 1 | OS03G0157500 | CUFF.5958 | OS03T01575(x | TSS4763 | 0         |           |
| chr3 | TCONS_00055145 | XLOC_044839 | 3173703 | 3174249 | - | 1 | OS03G0159200 | CUFF.7720 | OS03T01592(x | TSS4765 | 4.766E-28 |           |
| chr3 | TCONS_00049823 | XLOC_044842 | 3190168 | 3190390 | - | 1 | NA           | CUFF.5963 | NA           | u       | TSS4765   | 1.049E-32 |
| chr3 | TCONS_00055146 | XLOC_044845 | 3209283 | 3209565 | - | 1 | OS03G0160200 | CUFF.7722 | OS03T01602(x | TSS4765 | 5.772E-84 |           |
| chr3 | TCONS_00055149 | XLOC_044892 | 3617266 | 3617722 | - | 1 | OS03G0166800 | CUFF.7750 | OS03T01668(i | TSS4770 | 4.293E-21 |           |
| chr3 | TCONS_00055154 | XLOC_044930 | 3837507 | 3837732 | - | 1 | NA           | CUFF.7757 | NA           | u       | TSS4775   | 0.01177   |
| chr3 | TCONS_00049944 | XLOC_044952 | 4016832 | 4017069 | - | 1 | NA           | CUFF.6005 | NA           | u       | TSS4777   | 1.594E-22 |
| chr3 | TCONS_00049955 | XLOC_044963 | 4082880 | 4083347 | - | 1 | OS03G0177000 | CUFF.6012 | OS03T01770(x | TSS4778 | 1.004E-35 |           |
| chr3 | TCONS_00049958 | XLOC_044966 | 4094711 | 4095004 | - | 1 | REFA1        | CUFF.7311 | OS03T01774(i | TSS4779 | 0         |           |
| chr3 | TCONS_00049978 | XLOC_044984 | 4206450 | 4206773 | - | 1 | OS03G0180300 | CUFF.6022 | OS03T01803(i | TSS4781 | 5.298E-17 |           |
| chr3 | TCONS_00049986 | XLOC_044991 | 4249817 | 4250019 | - | 1 | OS03G0181100 | CUFF.6021 | OS03T01811(x | TSS4781 | 4.455E-39 |           |
| chr3 | TCONS_00055163 | XLOC_045016 | 4414442 | 4414687 | - | 1 | PDS          | CUFF.7804 | OS03T01840(x | TSS4784 | 6.879E-13 |           |
| chr3 | TCONS_00055165 | XLOC_045019 | 4430799 | 4431041 | - | 1 | OS03G0184300 | CUFF.7807 | OS03T01843(i | TSS4784 | 2.217E-31 |           |
| chr3 | TCONS_00055168 | XLOC_045029 | 4487972 | 4488733 | - | 1 | OS03G0185500 | CUFF.7805 | OS03T01855(x | TSS4785 | 2.863E-13 |           |
| chr3 | TCONS_00050032 | XLOC_045035 | 4554191 | 4554446 | - | 1 | NA           | CUFF.6032 | NA           | u       | TSS4786   | 1.053E-73 |
| chr3 | TCONS_00055170 | XLOC_045035 | 4554240 | 4554496 | - | 1 | NA           | CUFF.7808 | NA           | u       | TSS4786   | 2.101E-37 |
| chr3 | TCONS_00055171 | XLOC_045036 | 4559270 | 4559630 | - | 1 | OS03G0187100 | CUFF.7811 | OS03T01871(x | TSS4786 | 2.348E-26 |           |
| chr3 | TCONS_00055173 | XLOC_045042 | 4597411 | 4597678 | - | 1 | OS03G0187700 | CUFF.7813 | OS03T01877(i | TSS4787 | 4.203E-26 |           |
| chr3 | TCONS_00050049 | XLOC_045053 | 4661952 | 4662172 | - | 1 | NA           | CUFF.6042 | NA           | u       | TSS4788   | 3.992E-68 |
| chr3 | TCONS_00050050 | XLOC_045054 | 4662643 | 4662856 | - | 1 | NA           | CUFF.6040 | NA           | u       | TSS4788   | 0         |
| chr3 | TCONS_00050051 | XLOC_045055 | 4662908 | 4663224 | - | 1 | NA           | CUFF.6041 | NA           | u       | TSS4788   | 6.004E-85 |
| chr3 | TCONS_00050066 | XLOC_045070 | 4764920 | 4765130 | - | 1 | OS03G0191400 | CUFF.6052 | OS03T01914(x | TSS4790 | 0         |           |
| chr3 | TCONS_00055174 | XLOC_045081 | 4818752 | 4819025 | - | 1 | BIPP2C1      | CUFF.7851 | OS03T01925(i | TSS4791 | 0.0007261 |           |
| chr3 | TCONS_00055175 | XLOC_045084 | 4838338 | 4838859 | - | 1 | NA           | CUFF.7826 | NA           | u       | TSS4791   | 2.154E-11 |

|      |                |             |         |         |   |   |              |                        |   |         |           |
|------|----------------|-------------|---------|---------|---|---|--------------|------------------------|---|---------|-----------|
| chr3 | TCONS_00055177 | XLOC_045087 | 4840054 | 4840254 | - | 1 | NA           | CUFF.7828 NA           | u | TSS4792 | 3.258E-32 |
| chr3 | TCONS_00055178 | XLOC_045088 | 4841456 | 4841825 | - | 1 | NA           | CUFF.7827 NA           | u | TSS4792 | 4.872E-05 |
| chr3 | TCONS_00055182 | XLOC_045105 | 4910886 | 4911241 | - | 1 | OS03G0194500 | CUFF.7845 OS03T01945(x |   | TSS4793 | 5.694E-16 |
| chr3 | TCONS_00050101 | XLOC_045108 | 4926813 | 4927050 | - | 1 | NA           | CUFF.6059 NA           | u | TSS4794 | 9.688E-29 |
| chr3 | TCONS_00050182 | XLOC_045186 | 5424662 | 5424934 | - | 1 | NA           | CUFF.6092 NA           | u | TSS4802 | 0         |
| chr3 | TCONS_00050183 | XLOC_045187 | 5426610 | 5426817 | - | 1 | NA           | CUFF.6094 NA           | u | TSS4802 | 1.713E-52 |
| chr3 | TCONS_00050184 | XLOC_045188 | 5427027 | 5427255 | - | 1 | NA           | CUFF.6090 NA           | u | TSS4802 | 9.345E-20 |
| chr3 | TCONS_00055196 | XLOC_045228 | 5675979 | 5676184 | - | 1 | OS03G0208700 | CUFF.7891 OS03T02087(x |   | TSS4807 | 2.638E-18 |
| chr3 | TCONS_00055202 | XLOC_045263 | 5912540 | 5912780 | - | 1 | OS03G0213300 | CUFF.7919 OS03T02133(i |   | TSS4810 | 1.283E-05 |
| chr3 | TCONS_00055205 | XLOC_045302 | 6229660 | 6229940 | - | 1 | OS03G0218300 | CUFF.7928 OS03T02183(x |   | TSS4815 | 0.024257  |
| chr3 | TCONS_00050301 | XLOC_045303 | 6230216 | 6231094 | - | 1 | NA           | CUFF.6135 NA           | u | TSS4815 | 6.796E-21 |
| chr3 | TCONS_00050316 | XLOC_045315 | 6283197 | 6283401 | - | 1 | OS03G0219500 | CUFF.6139 OS03T02195(i |   | TSS4816 | 0         |
| chr3 | TCONS_00055210 | XLOC_045321 | 6327805 | 6328161 | - | 1 | OS03G0220700 | CUFF.7938 OS03T02207(i |   | TSS4817 | 0.025115  |
| chr3 | TCONS_00055211 | XLOC_045322 | 6332798 | 6333145 | - | 1 | OS03G0220700 | CUFF.7961 OS03T02207(i |   | TSS4817 | 1.295E-64 |
| chr3 | TCONS_00050350 | XLOC_045349 | 6538964 | 6539207 | - | 1 | HSFA9        | CUFF.6155 OS03T02247(i |   | TSS4820 | 5.434E-47 |
| chr3 | TCONS_00055217 | XLOC_045349 | 6538415 | 6539137 | - | 1 | HSFA9        | CUFF.7959 OS03T02247(i |   | TSS4820 | 9.164E-17 |
| chr3 | TCONS_00050351 | XLOC_045350 | 6541414 | 6541979 | - | 1 | NCRNA_1003   | CUFF.6156 NCRNA_100:x  |   | TSS4820 | 4.115E-12 |
| chr3 | TCONS_00055222 | XLOC_045361 | 6585063 | 6585315 | - | 1 | NA           | CUFF.7953 NA           | u | TSS4821 | 4.872E-05 |
| chr3 | TCONS_00055223 | XLOC_045363 | 6592192 | 6592575 | - | 1 | OS03G0225700 | CUFF.7963 OS03T02257(i |   | TSS4822 | 3.718E-24 |
| chr3 | TCONS_00050376 | XLOC_045377 | 6755549 | 6756137 | - | 1 | OS03G0227800 | CUFF.6174 OS03T02278(x |   | TSS4823 | 1.163E-10 |
| chr3 | TCONS_00050385 | XLOC_045387 | 6788243 | 6788466 | - | 1 | OS03G0228500 | CUFF.6166 OS03T02285(i |   | TSS4824 | 1.356E-15 |
| chr3 | TCONS_00050386 | XLOC_045389 | 6792520 | 6792760 | - | 1 | NA           | CUFF.6160 NA           | u | TSS4824 | 1.463E-23 |
| chr3 | TCONS_00055226 | XLOC_045402 | 6899708 | 6899918 | - | 1 | NA           | CUFF.7972 NA           | u | TSS4826 | 4.293E-21 |
| chr3 | TCONS_00055227 | XLOC_045403 | 6903000 | 6903393 | - | 1 | OS03G0230500 | CUFF.7974 OS03T02305(i |   | TSS4826 | 3.796E-39 |
| chr3 | TCONS_00055228 | XLOC_045405 | 6932081 | 6932318 | - | 1 | OS03G0231000 | CUFF.7975 OS03T02310(x |   | TSS4826 | 1.388E-11 |
| chr3 | TCONS_00055232 | XLOC_045445 | 7226849 | 7227266 | - | 1 | OS03G0237000 | CUFF.7989 OS03T02370(i |   | TSS4830 | 1.549E-20 |
| chr3 | TCONS_00055235 | XLOC_045476 | 7476947 | 7477168 | - | 1 | OS03G0241200 | CUFF.7998 OS03T02412(i |   | TSS4834 | 0.005791  |
| chr3 | TCONS_00055245 | XLOC_045544 | 7982808 | 7983235 | - | 1 | OS03G0251500 | CUFF.8036 OS03T02515(i |   | TSS4841 | 1.361E-38 |
| chr3 | TCONS_00050567 | XLOC_045558 | 8154250 | 8154516 | - | 1 | OS03G0254400 | CUFF.6216 OS03T02544(x |   | TSS4843 | 0         |
| chr3 | TCONS_00050606 | XLOC_045593 | 8459670 | 8459890 | - | 1 | OS03G0260600 | CUFF.6228 OS03T02606(i |   | TSS4847 | 5.288E-42 |
| chr3 | TCONS_00055251 | XLOC_045619 | 8668172 | 8668659 | - | 1 | OS03G0263700 | CUFF.8071 OS03T02637(x |   | TSS4850 | 2.26E-21  |
| chr3 | TCONS_00055252 | XLOC_045620 | 8668869 | 8669353 | - | 1 | OS03G0263700 | CUFF.8075 OS03T02637(i |   | TSS4850 | 0.51256   |
| chr3 | TCONS_00050658 | XLOC_045644 | 8852515 | 8853061 | - | 1 | OS03G0267500 | CUFF.6251 OS03T02675(i |   | TSS4852 | 3.505E-59 |
| chr3 | TCONS_00055259 | XLOC_045670 | 9134758 | 9135031 | - | 1 | OS03G0272300 | CUFF.8096 OS03T02723(x |   | TSS4855 | 1.388E-11 |
| chr3 | TCONS_00055262 | XLOC_045683 | 9251368 | 9251597 | - | 1 | OS03G0274300 | CUFF.8107 OS03T02743(i |   | TSS4856 | 5.016E-18 |

|      |                |             |          |          |   |   |              |           |              |         |           |           |
|------|----------------|-------------|----------|----------|---|---|--------------|-----------|--------------|---------|-----------|-----------|
| chr3 | TCONS_00050726 | XLOC_045704 | 9403533  | 9404211  | - | 1 | OS03G0277100 | CUFF.6275 | OS03T02771(x | TSS4859 | 0         |           |
| chr3 | TCONS_00050736 | XLOC_045714 | 9445601  | 9445820  | - | 1 | OS03G0278200 | CUFF.6281 | OS03T02782(i | TSS4860 | 9.642E-50 |           |
| chr3 | TCONS_00050760 | XLOC_045739 | 9592711  | 9592916  | - | 1 | OS03G0280700 | CUFF.6284 | OS03T02807(i | TSS4862 | 3.765E-36 |           |
| chr3 | TCONS_00050814 | XLOC_045790 | 9873551  | 9874076  | - | 1 | OS03G0286300 | CUFF.6304 | OS03T02863(i | TSS4868 | 0         |           |
| chr3 | TCONS_00050816 | XLOC_045792 | 9875305  | 9876012  | - | 1 | OS03G0286300 | CUFF.6307 | OS03T02863(i | TSS4868 | 0         |           |
| chr3 | TCONS_00050822 | XLOC_045798 | 9938425  | 9938659  | - | 1 | OS03G0287500 | CUFF.6300 | OS03T02875(i | TSS4869 | 1.561E-32 |           |
| chr3 | TCONS_00055273 | XLOC_045798 | 9938622  | 9938827  | - | 1 | OS03G0287500 | CUFF.8146 | OS03T02875(i | TSS4869 | 1.17E-31  |           |
| chr3 | TCONS_00055274 | XLOC_045801 | 9947744  | 9948030  | - | 1 | OS03G0287800 | CUFF.8145 | OS03T02878(i | TSS4869 | 1.959E-24 |           |
| chr3 | TCONS_00055281 | XLOC_045812 | 10011858 | 10012186 | - | 1 | NA           | CUFF.8141 | NA           | u       | TSS4870   | 4.257E-36 |
| chr3 | TCONS_00050830 | XLOC_045813 | 10012394 | 10012607 | - | 1 | NA           | CUFF.6310 | NA           | u       | TSS4870   | 4.811E-71 |
| chr3 | TCONS_00055286 | XLOC_045837 | 10213275 | 10213505 | - | 1 | NA           | CUFF.8160 | NA           | u       | TSS4873   | 5.016E-18 |
| chr3 | TCONS_00050860 | XLOC_045846 | 10258961 | 10259258 | - | 1 | OS03G0294200 | CUFF.6332 | OS03T02942(x | TSS4874 | 4.929E-40 |           |
| chr3 | TCONS_00050861 | XLOC_045847 | 10266331 | 10266536 | - | 1 | OS03G0294200 | CUFF.6333 | OS03T02942(x | TSS4874 | 2.456E-75 |           |
| chr3 | TCONS_00055294 | XLOC_045903 | 10609127 | 10609580 | - | 1 | OS03G0301400 | CUFF.8188 | OS03T03014(i | TSS4880 | 2.638E-18 |           |
| chr3 | TCONS_00055295 | XLOC_045908 | 10646493 | 10646762 | - | 1 | OS03G0301950 | CUFF.8189 | OS03T03019(x | TSS4880 | 6.522E-60 |           |
| chr3 | TCONS_00055297 | XLOC_045939 | 10914514 | 10914774 | - | 1 | OS03G0307000 | CUFF.8205 | OS03T03070(i | TSS4884 | 7.656E-49 |           |
| chr3 | TCONS_00055303 | XLOC_045994 | 11375514 | 11375969 | - | 1 | NA           | CUFF.8669 | NA           | u       | TSS4890   | 1.583E-71 |
| chr3 | TCONS_00055304 | XLOC_045995 | 11376341 | 11376818 | - | 1 | NA           | CUFF.8671 | NA           | u       | TSS4890   | 2.469E-51 |
| chr3 | TCONS_00051007 | XLOC_045996 | 11408159 | 11408396 | - | 1 | NA           | CUFF.6380 | NA           | u       | TSS4890   | 5.54E-17  |
| chr3 | TCONS_00051025 | XLOC_046013 | 11522931 | 11523783 | - | 1 | CAM1-1       | CUFF.6396 | OS03T03193(x | TSS4892 | 4.208E-53 |           |
| chr3 | TCONS_00051050 | XLOC_046034 | 11675339 | 11675552 | - | 1 | OS03G0322500 | CUFF.6399 | OS03T03225(i | TSS4894 | 1.219E-68 |           |
| chr3 | TCONS_00055306 | XLOC_046037 | 11695051 | 11695555 | - | 1 | OS03G0322800 | CUFF.8861 | OS03T03228(i | TSS4894 | 2.02E-19  |           |
| chr3 | TCONS_00051056 | XLOC_046041 | 11713063 | 11713297 | - | 1 | CHLH         | CUFF.6398 | OS03T03232(i | TSS4895 | 3.192E-33 |           |
| chr3 | TCONS_00055308 | XLOC_046076 | 11996972 | 11997191 | - | 1 | NA           | CUFF.8258 | NA           | u       | TSS4898   | 0.0001868 |
| chr3 | TCONS_00055311 | XLOC_046083 | 12004983 | 12005652 | - | 1 | NA           | CUFF.8260 | NA           | u       | TSS4899   | 2.044E-06 |
| chr3 | TCONS_00055312 | XLOC_046084 | 12006300 | 12006638 | - | 1 | OS03G0328000 | CUFF.8266 | OS03T03280(x | TSS4899 | 0.024257  |           |
| chr3 | TCONS_00051150 | XLOC_046137 | 12465054 | 12465254 | - | 1 | OS03G0336300 | CUFF.6439 | OS03T03363(i | TSS4905 | 0         |           |
| chr3 | TCONS_00055325 | XLOC_046158 | 12696618 | 12696839 | - | 1 | OS03G0340900 | CUFF.8315 | OS03T03409(i | TSS4907 | 5.765E-45 |           |
| chr3 | TCONS_00051175 | XLOC_046160 | 12703147 | 12703347 | - | 1 | OS03G0340900 | CUFF.6448 | OS03T03409(x | TSS4907 | 0         |           |
| chr3 | TCONS_00055326 | XLOC_046204 | 12986804 | 12987101 | - | 1 | ABH1         | CUFF.8330 | OS03T03472(x | TSS4912 | 7.048E-34 |           |
| chr3 | TCONS_00055327 | XLOC_046222 | 13163669 | 13163968 | - | 1 | OS03G0351300 | CUFF.8332 | OS03T03513(x | TSS4914 | 0         |           |
| chr3 | TCONS_00055328 | XLOC_046233 | 13240844 | 13241046 | - | 1 | NA           | CUFF.8338 | NA           | u       | TSS4915   | 1.326E-28 |
| chr3 | TCONS_00055329 | XLOC_046236 | 13241627 | 13241835 | - | 1 | NA           | CUFF.8342 | NA           | u       | TSS4915   | 5.016E-18 |
| chr3 | TCONS_00055331 | XLOC_046239 | 13242855 | 13243097 | - | 1 | NA           | CUFF.8340 | NA           | u       | TSS4916   | 3.718E-24 |
| chr3 | TCONS_00055332 | XLOC_046240 | 13243373 | 13243595 | - | 1 | NA           | CUFF.8341 | NA           | u       | TSS4916   | 7.869E-14 |

|      |                |             |          |          |   |   |              |           |              |         |           |           |
|------|----------------|-------------|----------|----------|---|---|--------------|-----------|--------------|---------|-----------|-----------|
| chr3 | TCONS_00051314 | XLOC_046294 | 13881137 | 13881360 | - | 1 | OS03G0358100 | CUFF.6499 | OS03T03581(i | TSS4922 | 1.062E-37 |           |
| chr3 | TCONS_00055340 | XLOC_046310 | 13979002 | 13979238 | - | 1 | OS03G0359700 | CUFF.8381 | OS03T03597(i | TSS4923 | 1.399E-43 |           |
| chr3 | TCONS_00051378 | XLOC_046351 | 14316339 | 14316547 | - | 1 | NA           | CUFF.6511 | NA           | u       | TSS4927   | 6.102E-79 |
| chr3 | TCONS_00055343 | XLOC_046355 | 14323112 | 14323323 | - | 1 | OS03G0366200 | CUFF.8388 | OS03T03662(x | TSS4928 | 7.847E-45 |           |
| chr3 | TCONS_00051394 | XLOC_046371 | 14432541 | 14432744 | - | 1 | OS03G0367900 | CUFF.6530 | OS03T03679(i | TSS4930 | 1.991E-61 |           |
| chr3 | TCONS_00055347 | XLOC_046382 | 14526886 | 14527219 | - | 1 | OS03G0370000 | CUFF.8401 | OS03T03700(i | TSS4931 | 3.624E-65 |           |
| chr3 | TCONS_00055348 | XLOC_046391 | 14661520 | 14661738 | - | 1 | OS03G0372500 | CUFF.8407 | OS03T03725(i | TSS4932 | 7.393E-44 |           |
| chr3 | TCONS_00051414 | XLOC_046392 | 14663543 | 14663749 | - | 1 | OS03G0372500 | CUFF.6532 | OS03T03725(i | TSS4932 | 0         |           |
| chr3 | TCONS_00051425 | XLOC_046403 | 14729363 | 14729694 | - | 1 | OS03G0374400 | CUFF.6533 | OS03T03744(i | TSS4933 | 0.42661   |           |
| chr3 | TCONS_00051426 | XLOC_046404 | 14729846 | 14730273 | - | 1 | OS03G0374400 | CUFF.6534 | OS03T03744(i | TSS4933 | 1.724E-36 |           |
| chr3 | TCONS_00055356 | XLOC_046447 | 15067530 | 15067857 | - | 1 | NA           | CUFF.8417 | NA           | u       | TSS4938   | 4.257E-36 |
| chr3 | TCONS_00055357 | XLOC_046448 | 15068591 | 15068791 | - | 1 | NA           | CUFF.8415 | NA           | u       | TSS4938   | 3.249E-27 |
| chr3 | TCONS_00055359 | XLOC_046457 | 15160124 | 15160664 | - | 1 | NA           | CUFF.8422 | NA           | u       | TSS4939   | 1.991E-12 |
| chr3 | TCONS_00051499 | XLOC_046480 | 15412473 | 15412816 | - | 1 | NA           | CUFF.6545 | NA           | u       | TSS4941   | 2.637E-06 |
| chr3 | TCONS_00055362 | XLOC_046480 | 15412475 | 15412633 | - | 1 | NA           | CUFF.8428 | NA           | u       | TSS4941   | 0.012046  |
| chr3 | TCONS_00055363 | XLOC_046482 | 15414606 | 15414868 | - | 1 | NA           | CUFF.8429 | NA           | u       | TSS4941   | 0.01177   |
| chr3 | TCONS_00055364 | XLOC_046482 | 15415047 | 15415564 | - | 1 | NA           | CUFF.8432 | NA           | u       | TSS4941   | 1.553E-13 |
| chr3 | TCONS_00051505 | XLOC_046485 | 15419590 | 15419815 | - | 1 | NA           | CUFF.6553 | NA           | u       | TSS4942   | 3.233E-38 |
| chr3 | TCONS_00055371 | XLOC_046498 | 15503361 | 15503869 | - | 1 | NA           | CUFF.8437 | NA           | u       | TSS4943   | 6.268E-22 |
| chr3 | TCONS_00051519 | XLOC_046499 | 15504131 | 15504424 | - | 1 | NA           | CUFF.6561 | NA           | u       | TSS4943   | 0         |
| chr3 | TCONS_00051546 | XLOC_046526 | 15641648 | 15641874 | - | 1 | OS03G0390400 | CUFF.6576 | OS03T03904(i | TSS4946 | 5.832E-57 |           |
| chr3 | TCONS_00055374 | XLOC_046526 | 15641434 | 15641704 | - | 1 | OS03G0390400 | CUFF.8470 | OS03T03904(i | TSS4946 | 6.161E-27 |           |
| chr3 | TCONS_00055375 | XLOC_046528 | 15645893 | 15646338 | - | 1 | H3           | CUFF.8467 | OS03T03906(i | TSS4946 | 9.541E-18 |           |
| chr3 | TCONS_00051606 | XLOC_046580 | 15960935 | 15961470 | - | 1 | NA           | CUFF.6586 | NA           | u       | TSS4952   | 5.061E-12 |
| chr3 | TCONS_00055380 | XLOC_046580 | 15960549 | 15961357 | - | 1 | NA           | CUFF.8469 | NA           | u       | TSS4952   | 7.578E-05 |
| chr3 | TCONS_00055382 | XLOC_046584 | 15993232 | 15993605 | - | 1 | NA           | CUFF.8468 | NA           | u       | TSS4953   | 1.339E-23 |
| chr3 | TCONS_00055383 | XLOC_046626 | 16286901 | 16287563 | - | 1 | OS03G0401100 | CUFF.8484 | OS03T04011(i | TSS4957 | 1.991E-12 |           |
| chr3 | TCONS_00055386 | XLOC_046656 | 16658019 | 16658223 | - | 1 | OS03G0406200 | CUFF.8501 | OS03T04062(x | TSS4960 | 2.529E-33 |           |
| chr3 | TCONS_00055390 | XLOC_046680 | 16790639 | 16790878 | - | 1 | NA           | CUFF.8503 | NA           | u       | TSS4963   | 2.943E-20 |
| chr3 | TCONS_00055393 | XLOC_046701 | 16965836 | 16966592 | - | 1 | OS03G0411100 | CUFF.8516 | OS03T04111(i | TSS4965 | 2.576E-38 |           |
| chr3 | TCONS_00055394 | XLOC_046702 | 16968072 | 16968362 | - | 1 | OS03G0411100 | CUFF.8525 | OS03T04111(i | TSS4965 | 5.016E-18 |           |
| chr3 | TCONS_00055395 | XLOC_046705 | 17000132 | 17000435 | - | 1 | OS03G0411600 | CUFF.8515 | OS03T04116(i | TSS4966 | 5.418E-30 |           |
| chr3 | TCONS_00051734 | XLOC_046706 | 17000565 | 17000781 | - | 1 | OS03G0411600 | CUFF.6622 | OS03T04116(i | TSS4966 | 0.0008649 |           |
| chr3 | TCONS_00055396 | XLOC_046707 | 17001441 | 17002328 | - | 1 | NA           | CUFF.8519 | NA           | u       | TSS4966   | 1.339E-23 |
| chr3 | TCONS_00051745 | XLOC_046716 | 17079405 | 17079610 | - | 1 | OS03G0412900 | CUFF.6626 | OS03T04129(i | TSS4967 | 2.456E-75 |           |

|      |                |             |          |          |   |   |              |           |              |         |           |           |
|------|----------------|-------------|----------|----------|---|---|--------------|-----------|--------------|---------|-----------|-----------|
| chr3 | TCONS_00055397 | XLOC_046718 | 17083952 | 17084235 | - | 1 | OS03G0412900 | CUFF.8520 | OS03T04129(x | TSS4967 | 3.796E-39 |           |
| chr3 | TCONS_00051787 | XLOC_046753 | 17450466 | 17450843 | - | 1 | OS03G0419100 | CUFF.6645 | OS03T04191(i | TSS4971 | 1.737E-09 |           |
| chr3 | TCONS_00055399 | XLOC_046786 | 17780588 | 17780833 | - | 1 | OS03G0425800 | CUFF.8563 | OS03T04258(i | TSS4975 | 7.056E-24 |           |
| chr3 | TCONS_00051825 | XLOC_046787 | 17780940 | 17781180 | - | 1 | OS03G0425800 | CUFF.6652 | OS03T04258(i | TSS4975 | 1.336E-34 |           |
| chr3 | TCONS_00055400 | XLOC_046787 | 17780997 | 17781236 | - | 1 | OS03G0425800 | CUFF.8566 | OS03T04258(i | TSS4975 | 0         |           |
| chr3 | TCONS_00055402 | XLOC_046803 | 17939738 | 17939979 | - | 1 | NA           | CUFF.8560 | NA           | u       | TSS4977   | 5.592E-20 |
| chr3 | TCONS_00051842 | XLOC_046806 | 17990310 | 17990590 | - | 1 | XDH          | CUFF.6657 | OS03T04298(i | TSS4977 | 2.178E-23 |           |
| chr3 | TCONS_00055407 | XLOC_046821 | 18133571 | 18133773 | - | 1 | OS03G0431800 | CUFF.8572 | OS03T04318(i | TSS4978 | 7.187E-39 |           |
| chr3 | TCONS_00055408 | XLOC_046822 | 18142986 | 18143433 | - | 1 | NA           | CUFF.8568 | NA           | u       | TSS4979   | 1.77E-31  |
| chr3 | TCONS_00055409 | XLOC_046830 | 18208793 | 18209084 | - | 1 | NA           | CUFF.8576 | NA           | u       | TSS4979   | 3.839E-19 |
| chr3 | TCONS_00055414 | XLOC_046869 | 18587853 | 18588165 | - | 1 | OS03G0439800 | CUFF.8589 | OS03T04398(i | TSS4983 | 1.991E-12 |           |
| chr3 | TCONS_00055417 | XLOC_046888 | 18885689 | 18885891 | - | 1 | NA           | CUFF.8585 | NA           | u       | TSS4986   | 9.526E-05 |
| chr3 | TCONS_00055419 | XLOC_046890 | 18890399 | 18890713 | - | 1 | OS03G0444900 | CUFF.8595 | OS03T04449(x | TSS4986 | 1.136E-14 |           |
| chr3 | TCONS_00055429 | XLOC_047051 | 20874409 | 20874614 | - | 1 | OS03G0572925 | CUFF.8666 | OS03T05729(x | TSS5003 | 2.542E-23 |           |
| chr3 | TCONS_00052174 | XLOC_047134 | 21683569 | 21683784 | - | 1 | OS03G0587000 | CUFF.6734 | OS03T05870(i | TSS5011 | 2.85E-45  |           |
| chr3 | TCONS_00052298 | XLOC_047250 | 22829322 | 22829508 | - | 1 | OS03G0607500 | CUFF.8721 | OS03T06075(x | TSS5023 | 0.0009954 |           |
| chr3 | TCONS_00055436 | XLOC_047306 | 23342189 | 23342430 | - | 1 | OS03G0616400 | CUFF.8730 | OS03T06164(i | TSS5029 | 3.249E-27 |           |
| chr3 | TCONS_00055447 | XLOC_047414 | 24349085 | 24349330 | - | 1 | NA           | CUFF.8792 | NA           | u       | TSS5040   | 7.056E-24 |
| chr3 | TCONS_00055448 | XLOC_047428 | 24468627 | 24468971 | - | 1 | OS03G0638400 | CUFF.8801 | OS03T06384(i | TSS5042 | 1.339E-23 |           |
| chr3 | TCONS_00052489 | XLOC_047429 | 24477123 | 24477326 | - | 1 | OS03G0638800 | CUFF.6848 | OS03T06388(i | TSS5042 | 0         |           |
| chr3 | TCONS_00055449 | XLOC_047429 | 24477258 | 24477654 | - | 1 | OS03G0638800 | CUFF.8810 | OS03T06388(i | TSS5042 | 3.718E-24 |           |
| chr3 | TCONS_00052498 | XLOC_047437 | 24521591 | 24521804 | - | 1 | OS03G0639200 | CUFF.6832 | OS03T06392(i | TSS5043 | 6.294E-45 |           |
| chr3 | TCONS_00052512 | XLOC_047454 | 24594082 | 24594294 | - | 1 | OS03G0639700 | CUFF.6830 | OS03T06397(x | TSS5045 | 4.093E-62 |           |
| chr3 | TCONS_00055453 | XLOC_047473 | 24731448 | 24731726 | - | 1 | OS03G0641700 | CUFF.8824 | OS03T06417(i | TSS5047 | 1.059E-39 |           |
| chr3 | TCONS_00055454 | XLOC_047512 | 25035929 | 25036178 | - | 1 | OS03G0646800 | CUFF.8851 | OS03T06468(i | TSS5051 | 1.635E-18 |           |
| chr3 | TCONS_00055456 | XLOC_047516 | 25038280 | 25038762 | - | 1 | OS03G0646800 | CUFF.8857 | OS03T06468(i | TSS5051 | 2.869E-25 |           |
| chr3 | TCONS_00055463 | XLOC_047603 | 25635339 | 25635546 | - | 1 | OS03G0657000 | CUFF.8888 | OS03T06570(i | TSS5060 | 1.069E-70 |           |
| chr3 | TCONS_00055467 | XLOC_047683 | 26319425 | 26319777 | - | 1 | OS03G0668000 | CUFF.8912 | OS03T06680(x | TSS5069 | 9.52E-27  |           |
| chr3 | TCONS_00052761 | XLOC_047689 | 26339878 | 26340289 | - | 1 | NA           | CUFF.6897 | NA           | u       | TSS5070   | 7.001E-60 |
| chr3 | TCONS_00052762 | XLOC_047690 | 26340975 | 26341348 | - | 1 | NA           | CUFF.6895 | NA           | u       | TSS5070   | 3.017E-11 |
| chr3 | TCONS_00055470 | XLOC_047690 | 26340788 | 26340993 | - | 1 | NA           | CUFF.8910 | NA           | u       | TSS5070   | 1.19E-21  |
| chr3 | TCONS_00055471 | XLOC_047690 | 26341112 | 26341489 | - | 1 | NA           | CUFF.8914 | NA           | u       | TSS5070   | 0.03754   |
| chr3 | TCONS_00055472 | XLOC_047691 | 26363696 | 26363915 | - | 1 | OS03G0668500 | CUFF.8915 | OS03T06685(i | TSS5070 | 1.562E-40 |           |
| chr3 | TCONS_00055475 | XLOC_047713 | 26518077 | 26518690 | - | 1 | NA           | CUFF.8922 | NA           | u       | TSS5072   | 3.155E-47 |
| chr3 | TCONS_00055483 | XLOC_047772 | 27095618 | 27095839 | - | 1 | NA           | CUFF.8945 | NA           | u       | TSS5079   | 0.0001868 |



|      |                |             |          |          |   |   |              |                        |   |         |           |
|------|----------------|-------------|----------|----------|---|---|--------------|------------------------|---|---------|-----------|
| chr3 | TCONS_00055484 | XLOC_047773 | 27096734 | 27097180 | - | 1 | NA           | CUFF.8962 NA           | u | TSS5079 | 6.187E-84 |
| chr3 | TCONS_00055485 | XLOC_047774 | 27097461 | 27097827 | - | 1 | NA           | CUFF.8946 NA           | u | TSS5079 | 0.002068  |
| chr3 | TCONS_00055487 | XLOC_047778 | 27099778 | 27100346 | - | 1 | NA           | CUFF.8957 NA           | u | TSS5080 | 1.795E-09 |
| chr3 | TCONS_00055488 | XLOC_047779 | 27100556 | 27101181 | - | 1 | NA           | CUFF.8949 NA           | u | TSS5080 | 5.815E-49 |
| chr3 | TCONS_00055489 | XLOC_047780 | 27102281 | 27102579 | - | 1 | NA           | CUFF.8951 NA           | u | TSS5080 | 9.077E-33 |
| chr3 | TCONS_00052861 | XLOC_047787 | 27109933 | 27110277 | - | 1 | OS03G0681300 | CUFF.8963 OS03T06813(x |   | TSS5081 | 8.297E-19 |
| chr3 | TCONS_00052895 | XLOC_047822 | 27336497 | 27336722 | - | 1 | OS03G0685300 | CUFF.6949 OS03T06853(i |   | TSS5084 | 7.189E-23 |
| chr3 | TCONS_00055501 | XLOC_047857 | 27540875 | 27541328 | - | 1 | NA           | CUFF.8976 NA           | u | TSS5088 | 3.311E-37 |
| chr3 | TCONS_00055503 | XLOC_047900 | 27891895 | 27892173 | - | 1 | OS03G0696300 | CUFF.9003 OS03T06963(i |   | TSS5093 | 1.399E-43 |
| chr3 | TCONS_00052996 | XLOC_047919 | 28046608 | 28046878 | - | 1 | OS03G0699600 | CUFF.6972 OS03T06996(i |   | TSS5095 | 0         |
| chr3 | TCONS_00055505 | XLOC_047919 | 28046724 | 28046989 | - | 1 | OS03G0699600 | CUFF.9010 OS03T06996(i |   | TSS5095 | 5.183E-48 |
| chr3 | TCONS_00053013 | XLOC_047941 | 28145110 | 28145497 | - | 1 | OS03G0701200 | CUFF.6983 OS03T07012(i |   | TSS5097 | 3.386E-18 |
| chr3 | TCONS_00053014 | XLOC_047942 | 28146808 | 28147237 | - | 1 | NA           | CUFF.6974 NA           | u | TSS5097 | 7.06E-28  |
| chr3 | TCONS_00055514 | XLOC_047950 | 28181223 | 28181641 | - | 1 | PIPK1        | CUFF.9030 OS03T07018(x |   | TSS5098 | 2.043E-22 |
| chr3 | TCONS_00055517 | XLOC_047970 | 28331074 | 28331394 | - | 1 | OS03G0704700 | CUFF.9043 OS03T07047(i |   | TSS5100 | 6.11E-54  |
| chr3 | TCONS_00055519 | XLOC_047972 | 28332974 | 28333192 | - | 1 | OS03G0704700 | CUFF.9047 OS03T07047(i |   | TSS5100 | 1.339E-23 |
| chr3 | TCONS_00055526 | XLOC_048040 | 28902833 | 28903107 | - | 1 | OS03G0714400 | CUFF.9069 OS03T07144(x |   | TSS5108 | 1.217E-41 |
| chr3 | TCONS_00055527 | XLOC_048058 | 29065930 | 29066263 | - | 1 | OS03G0717900 | CUFF.9073 OS03T07179(x |   | TSS5110 | 1.335E-33 |
| chr3 | TCONS_00055530 | XLOC_048077 | 29201124 | 29201379 | - | 1 | OS03G0720300 | CUFF.9110 OS03T07203(i |   | TSS5112 | 7.971E-54 |
| chr3 | TCONS_00053156 | XLOC_048078 | 29250354 | 29250672 | - | 1 | NA           | CUFF.7027 NA           | u | TSS5112 | 8.551E-21 |
| chr3 | TCONS_00055532 | XLOC_048080 | 29251068 | 29251419 | - | 1 | NA           | CUFF.9088 NA           | u | TSS5112 | 3.675E-06 |
| chr3 | TCONS_00055538 | XLOC_048093 | 29267402 | 29267811 | - | 1 | OS03G0721200 | CUFF.9111 OS03T07212(i |   | TSS5114 | 3.839E-19 |
| chr3 | TCONS_00055539 | XLOC_048099 | 29295895 | 29296293 | - | 1 | NA           | CUFF.9097 NA           | u | TSS5114 | 5.016E-18 |
| chr3 | TCONS_00055546 | XLOC_048124 | 29464251 | 29464453 | - | 1 | NCRNA_20695  | CUFF.9121 NCRNA_206(x  |   | TSS5117 | 1.335E-33 |
| chr3 | TCONS_00055548 | XLOC_048126 | 29470650 | 29470772 | - | 1 | NA           | CUFF.9119 NA           | u | TSS5117 | 0.20934   |
| chr3 | TCONS_00055553 | XLOC_048189 | 29940449 | 29940854 | - | 1 | OS03G0731500 | CUFF.9146 OS03T07315(i |   | TSS5124 | 2.02E-19  |
| chr3 | TCONS_00055555 | XLOC_048210 | 30075970 | 30076209 | - | 1 | NA           | CUFF.9147 NA           | u | TSS5126 | 8.061E-36 |
| chr3 | TCONS_00053311 | XLOC_048238 | 30267874 | 30268270 | - | 1 | NA           | CUFF.7079 NA           | u | TSS5129 | 1.061E-70 |
| chr3 | TCONS_00055558 | XLOC_048238 | 30267718 | 30267983 | - | 1 | NA           | CUFF.9159 NA           | u | TSS5129 | 5.183E-48 |
| chr3 | TCONS_00055561 | XLOC_048240 | 30269178 | 30269721 | - | 1 | NA           | CUFF.9165 NA           | u | TSS5129 | 4.732E-18 |
| chr3 | TCONS_00053314 | XLOC_048241 | 30270266 | 30270850 | - | 1 | NA           | CUFF.7082 NA           | u | TSS5130 | 2.79E-36  |
| chr3 | TCONS_00055562 | XLOC_048241 | 30269975 | 30270267 | - | 1 | NA           | CUFF.9173 NA           | u | TSS5129 | 0.024257  |
| chr3 | TCONS_00055564 | XLOC_048241 | 30270811 | 30271136 | - | 1 | NA           | CUFF.9162 NA           | u | TSS5130 | 8.187E-27 |
| chr3 | TCONS_00055566 | XLOC_048246 | 30273810 | 30274044 | - | 1 | NA           | CUFF.9169 NA           | u | TSS5130 | 0.98359   |
| chr3 | TCONS_00053321 | XLOC_048247 | 30275272 | 30275549 | - | 1 | NA           | CUFF.7085 NA           | u | TSS5130 | 2.074E-19 |

|      |                |             |          |          |   |   |              |           |              |   |         |           |
|------|----------------|-------------|----------|----------|---|---|--------------|-----------|--------------|---|---------|-----------|
| chr3 | TCONS_00055570 | XLOC_048250 | 30278018 | 30278462 | - | 1 | NA           | CUFF.9172 | NA           | u | TSS5131 | 1.865E-33 |
| chr3 | TCONS_00055571 | XLOC_048251 | 30278582 | 30278818 | - | 1 | NA           | CUFF.9174 | NA           | u | TSS5131 | 0.01177   |
| chr3 | TCONS_00053343 | XLOC_048270 | 30408152 | 30408951 | - | 1 | OS03G0741100 | CUFF.7107 | OS03T07411(i |   | TSS5133 | 0         |
| chr3 | TCONS_00053344 | XLOC_048271 | 30409655 | 30410086 | - | 1 | NA           | CUFF.7094 | NA           | u | TSS5133 | 1.783E-46 |
| chr3 | TCONS_00053376 | XLOC_048301 | 30627933 | 30628327 | - | 1 | OS03G0745400 | CUFF.7127 | OS03T07454(i |   | TSS5136 | 7.859E-42 |
| chr3 | TCONS_00053377 | XLOC_048303 | 30632856 | 30633081 | - | 1 | NA           | CUFF.7120 | NA           | u | TSS5137 | 5.553E-31 |
| chr3 | TCONS_00053389 | XLOC_048315 | 30760347 | 30760554 | - | 1 | RCS3         | CUFF.7137 | OS03T07478(i |   | TSS5138 | 0         |
| chr3 | TCONS_00053391 | XLOC_048317 | 30769836 | 30770045 | - | 1 | OS03G0747900 | CUFF.7133 | OS03T07479(x |   | TSS5138 | 0         |
| chr3 | TCONS_00055579 | XLOC_048321 | 30795598 | 30796047 | - | 1 | OS03G0748200 | CUFF.9227 | OS03T07482(x |   | TSS5138 | 5.418E-30 |
| chr3 | TCONS_00055580 | XLOC_048326 | 30828541 | 30828782 | - | 1 | OS03G0748900 | CUFF.9230 | OS03T07489(i |   | TSS5139 | 8.626E-16 |
| chr3 | TCONS_00053399 | XLOC_048327 | 30829205 | 30829444 | - | 1 | OS03G0748900 | CUFF.7136 | OS03T07489(x |   | TSS5139 | 5.741E-21 |
| chr3 | TCONS_00053427 | XLOC_048351 | 30951372 | 30951599 | - | 1 | NA           | CUFF.7143 | NA           | u | TSS5142 | 2.144E-28 |
| chr3 | TCONS_00055582 | XLOC_048352 | 30955255 | 30955486 | - | 1 | NA           | CUFF.9237 | NA           | u | TSS5142 | 7.056E-24 |
| chr3 | TCONS_00053428 | XLOC_048353 | 30955653 | 30955883 | - | 1 | NA           | CUFF.7142 | NA           | u | TSS5142 | 2.373E-22 |
| chr3 | TCONS_00053429 | XLOC_048354 | 30956764 | 30957440 | - | 1 | NA           | CUFF.7145 | NA           | u | TSS5142 | 0         |
| chr3 | TCONS_00055585 | XLOC_048362 | 31006119 | 31006519 | - | 1 | NA           | CUFF.9236 | NA           | u | TSS5143 | 1.512E-25 |
| chr3 | TCONS_00055586 | XLOC_048363 | 31007526 | 31007769 | - | 1 | OS03G0752100 | CUFF.9239 | OS03T07521(x |   | TSS5143 | 6.161E-27 |
| chr3 | TCONS_00053438 | XLOC_048367 | 31024997 | 31025199 | - | 1 | NA           | CUFF.7146 | NA           | u | TSS5143 | 0         |
| chr3 | TCONS_00055589 | XLOC_048438 | 31282289 | 31282499 | - | 1 | OS03G0757000 | CUFF.9256 | OS03T07570(x |   | TSS5151 | 1.576E-58 |
| chr3 | TCONS_00055593 | XLOC_048464 | 31377520 | 31378211 | - | 1 | OS03G0758600 | CUFF.9270 | OS03T07586(x |   | TSS5154 | 2.95E-10  |
| chr3 | TCONS_00053576 | XLOC_048483 | 31504114 | 31504524 | - | 1 | OS03G0761900 | CUFF.7175 | OS03T07619(x |   | TSS5156 | 0         |
| chr3 | TCONS_00055597 | XLOC_048501 | 31652854 | 31653102 | - | 1 | NA           | CUFF.9272 | NA           | u | TSS5157 | 0.01177   |
| chr3 | TCONS_00055598 | XLOC_048502 | 31653804 | 31654007 | - | 1 | NA           | CUFF.9274 | NA           | u | TSS5158 | 2.638E-18 |
| chr3 | TCONS_00055600 | XLOC_048508 | 31679286 | 31679756 | - | 1 | NA           | CUFF.9276 | NA           | u | TSS5158 | 2.38E-16  |
| chr3 | TCONS_00053619 | XLOC_048529 | 31809469 | 31809740 | - | 1 | NA           | CUFF.7189 | NA           | u | TSS5160 | 1.723E-35 |
| chr3 | TCONS_00055603 | XLOC_048543 | 31868052 | 31868562 | - | 1 | NA           | CUFF.9292 | NA           | u | TSS5162 | 3.249E-27 |
| chr3 | TCONS_00053674 | XLOC_048587 | 32209113 | 32209494 | - | 1 | OS03G0776900 | CUFF.7220 | OS03T07769(x |   | TSS5166 | 2.74E-16  |
| chr3 | TCONS_00055609 | XLOC_048587 | 32209336 | 32209643 | - | 1 | OS03G0776900 | CUFF.9317 | OS03T07769(i |   | TSS5167 | 7.869E-14 |
| chr3 | TCONS_00055610 | XLOC_048588 | 32210383 | 32210583 | - | 1 | OS03G0776900 | CUFF.9314 | OS03T07769(x |   | TSS5167 | 3.906E-44 |
| chr3 | TCONS_00055611 | XLOC_048589 | 32210770 | 32211039 | - | 1 | OS03G0776900 | CUFF.9315 | OS03T07769(x |   | TSS5167 | 8.155E-21 |
| chr3 | TCONS_00055614 | XLOC_048597 | 32267657 | 32267954 | - | 1 | OS03G0778000 | CUFF.9335 | OS03T07780(x |   | TSS5168 | 7.656E-49 |
| chr3 | TCONS_00053722 | XLOC_048634 | 32449483 | 32449692 | - | 1 | ARP7         | CUFF.7233 | OS03T07830(x |   | TSS5171 | 8.914E-85 |
| chr3 | TCONS_00055619 | XLOC_048643 | 32556955 | 32557435 | - | 1 | OS03G0784400 | CUFF.9347 | OS03T07844(i |   | TSS5172 | 8.626E-16 |
| chr3 | TCONS_00055620 | XLOC_048657 | 32624889 | 32625617 | - | 1 | OS03G0786000 | CUFF.9350 | OS03T07860(i |   | TSS5174 | 0.21005   |
| chr3 | TCONS_00053787 | XLOC_048701 | 32865061 | 32865267 | - | 1 | OS03G0790600 | CUFF.7257 | OS03T07906(x |   | TSS5179 | 1.78E-57  |

|      |                |             |          |          |   |   |              |                        |         |           |
|------|----------------|-------------|----------|----------|---|---|--------------|------------------------|---------|-----------|
| chr3 | TCONS_00055628 | XLOC_048728 | 33035225 | 33035499 | - | 1 | OS03G0794200 | CUFF.9373 OS03T07942(x | TSS5182 | 1.19E-21  |
| chr3 | TCONS_00055631 | XLOC_048741 | 33106719 | 33107069 | - | 1 | HSFA2E       | CUFF.9386 OS03T07959(x | TSS5183 | 9.482E-43 |
| chr3 | TCONS_00055633 | XLOC_048753 | 33186940 | 33187150 | - | 1 | OS03G0796800 | CUFF.9389 OS03T07968(x | TSS5184 | 1.136E-14 |
| chr3 | TCONS_00055634 | XLOC_048762 | 33237036 | 33237362 | - | 1 | NA           | CUFF.9393 NA u         | TSS5185 | 2.835E-15 |
| chr3 | TCONS_00053863 | XLOC_048779 | 33330419 | 33330655 | - | 1 | OS03G0799600 | CUFF.7277 OS03T07996(i | TSS5187 | 3.19E-28  |
| chr3 | TCONS_00053877 | XLOC_048796 | 33455402 | 33455771 | - | 1 | OS03G0801900 | CUFF.7282 OS03T08019(i | TSS5189 | 7.907E-09 |
| chr3 | TCONS_00053878 | XLOC_048797 | 33456957 | 33457290 | - | 1 | NA           | CUFF.7280 NA u         | TSS5189 | 1.856E-62 |
| chr3 | TCONS_00055644 | XLOC_048798 | 33460115 | 33460331 | - | 1 | NA           | CUFF.9405 NA u         | TSS5189 | 1.815E-17 |
| chr3 | TCONS_00055647 | XLOC_048805 | 33510437 | 33510825 | - | 1 | NA           | CUFF.9418 NA u         | TSS5190 | 1.339E-23 |
| chr3 | TCONS_00053924 | XLOC_048842 | 33725887 | 33726548 | - | 1 | NA           | CUFF.7300 NA u         | TSS5193 | 9.506E-18 |
| chr3 | TCONS_00055650 | XLOC_048900 | 34215807 | 34216239 | - | 1 | OS03G0816200 | CUFF.9450 OS03T08162(x | TSS5200 | 6.161E-27 |
| chr3 | TCONS_00053988 | XLOC_048901 | 34216578 | 34216792 | - | 1 | OS03G0816200 | CUFF.7316 OS03T08162(i | TSS5200 | 3.723E-69 |
| chr3 | TCONS_00054009 | XLOC_048922 | 34332528 | 34332750 | - | 1 | NA           | CUFF.7320 NA u         | TSS5202 | 9.093E-16 |
| chr3 | TCONS_00054015 | XLOC_048928 | 34359551 | 34359754 | - | 1 | OS03G0818800 | CUFF.7326 OS03T08188(x | TSS5203 | 0         |
| chr3 | TCONS_00054026 | XLOC_048939 | 34407901 | 34408107 | - | 1 | OS03G0819900 | CUFF.7328 OS03T08199(i | TSS5204 | 1.143E-77 |
| chr3 | TCONS_00055657 | XLOC_048979 | 34632265 | 34632471 | - | 1 | OS03G0824400 | CUFF.9483 OS03T08244(i | TSS5208 | 1.19E-21  |
| chr3 | TCONS_00054145 | XLOC_049050 | 35118348 | 35118685 | - | 1 | OS03G0835800 | CUFF.7363 OS03T08358(i | TSS5215 | 5.553E-31 |
| chr3 | TCONS_00055664 | XLOC_049086 | 35285132 | 35285561 | - | 1 | OS03G0839300 | CUFF.9526 OS03T08393(x | TSS5219 | 0.25353   |
| chr3 | TCONS_00054255 | XLOC_049152 | 35652617 | 35653091 | - | 1 | NA           | CUFF.7397 NA u         | TSS5226 | 2.366E-24 |
| chr3 | TCONS_00055673 | XLOC_049210 | 36077118 | 36077331 | - | 1 | OEP24        | CUFF.9577 OS03T08556(i | TSS5232 | 6.994E-29 |
| chr3 | TCONS_00054376 | XLOC_049265 | 843450   | 843651   | . | 1 | OS03G0114800 | CUFF.5825 OS03T01148(i | TSS5238 | 7.632E-32 |
| chr3 | TCONS_00055686 | XLOC_049279 | 11664581 | 11664781 | . | 1 | NA           | CUFF.8860 NA u         | TSS5240 | 1.549E-20 |
| chr3 | TCONS_00054382 | XLOC_049287 | 17348919 | 17349155 | . | 1 | OS03G0417800 | CUFF.6636 OS03T04178(i | TSS5240 | 1.563E-27 |
| chr3 | TCONS_00055703 | XLOC_049304 | 34503966 | 34504172 | . | 1 | OS03G0821900 | CUFF.9485 OS03T08219(i | TSS5242 | 5.592E-20 |
| chr4 | TCONS_00064121 | XLOC_049345 | 385733   | 386124   | + | 1 | NA           | CUFF.9609 NA u         | TSS5246 | 2.507E-09 |
| chr4 | TCONS_00064123 | XLOC_049380 | 710111   | 710506   | + | 1 | OS04G0112200 | CUFF.9624 OS04T01122(x | TSS5250 | 7.187E-39 |
| chr4 | TCONS_00055821 | XLOC_049413 | 1009525  | 1009770  | + | 1 | OS04G0117100 | CUFF.7463 OS04T01171(i | TSS5254 | 2.272E-18 |
| chr4 | TCONS_00064126 | XLOC_049425 | 1124076  | 1124480  | + | 1 | OS04G0118900 | CUFF.9639 OS04T01189(i | TSS5255 | 1.959E-24 |
| chr4 | TCONS_00064128 | XLOC_049469 | 1568849  | 1569144  | + | 1 | NCRNA_45870  | CUFF.9670 NCRNA_458' x | TSS5260 | 1.516E-21 |
| chr4 | TCONS_00055883 | XLOC_049471 | 1571494  | 1571756  | + | 1 | OS04G0125700 | CUFF.7484 OS04T01257(i | TSS5260 | 0         |
| chr4 | TCONS_00064129 | XLOC_049475 | 1586732  | 1587144  | + | 1 | NA           | CUFF.9648 NA u         | TSS5260 | 2.863E-13 |
| chr4 | TCONS_00064130 | XLOC_049484 | 1677852  | 1678538  | + | 1 | OS04G0126900 | CUFF.9652 OS04T01269(i | TSS5261 | 0.75271   |
| chr4 | TCONS_00064131 | XLOC_049485 | 1679416  | 1679618  | + | 1 | OS04G0126900 | CUFF.9653 OS04T01269(i | TSS5261 | 1.326E-28 |
| chr4 | TCONS_00064137 | XLOC_049569 | 2501759  | 2501965  | + | 1 | NA           | CUFF.9675 NA u         | TSS5270 | 1.027E-29 |
| chr4 | TCONS_00055991 | XLOC_049581 | 2706158  | 2706385  | + | 1 | NA           | CUFF.7496 NA u         | TSS5271 | 2.144E-28 |

|      |                |             |          |          |   |   |              |                         |   |         |           |
|------|----------------|-------------|----------|----------|---|---|--------------|-------------------------|---|---------|-----------|
| chr4 | TCONS_00055993 | XLOC_049583 | 2730144  | 2730380  | + | 1 | NA           | CUFF.7497 NA            | u | TSS5271 | 5.588E-26 |
| chr4 | TCONS_00064139 | XLOC_049584 | 2735163  | 2735387  | + | 1 | NA           | CUFF.9677 NA            | u | TSS5271 | 4.824E-23 |
| chr4 | TCONS_00064140 | XLOC_049585 | 2756486  | 2756686  | + | 1 | OS04G0140666 | CUFF.9678 OS04T014066(i |   | TSS5272 | 3.249E-27 |
| chr4 | TCONS_00064141 | XLOC_049610 | 3410735  | 3411159  | + | 1 | NA           | CUFF.9684 NA            | u | TSS5274 | 4.101E-57 |
| chr4 | TCONS_00064148 | XLOC_049731 | 4822022  | 4822291  | + | 1 | OS04G0170500 | CUFF.9720 OS04T01705(i  |   | TSS5287 | 3.396E-42 |
| chr4 | TCONS_00056197 | XLOC_049783 | 5484206  | 5484406  | + | 1 | OS04G0180300 | CUFF.7540 OS04T01803(x  |   | TSS5292 | 0         |
| chr4 | TCONS_00064154 | XLOC_049798 | 5638851  | 5639058  | + | 1 | ETFB         | CUFF.9744 OS04T01828(i  |   | TSS5294 | 5.104E-61 |
| chr4 | TCONS_00056285 | XLOC_049869 | 6480314  | 6481387  | + | 1 | OS04G0194500 | CUFF.7566 OS04T01945(x  |   | TSS5301 | 3.764E-36 |
| chr4 | TCONS_00056305 | XLOC_049887 | 6588313  | 6588548  | + | 1 | NA           | CUFF.7563 NA            | u | TSS5303 | 1.274E-20 |
| chr4 | TCONS_00056306 | XLOC_049888 | 6591775  | 6592178  | + | 1 | NA           | CUFF.7565 NA            | u | TSS5303 | 1.356E-15 |
| chr4 | TCONS_00064159 | XLOC_049905 | 6819368  | 6819760  | + | 1 | NA           | CUFF.9765 NA            | u | TSS5305 | 1.815E-17 |
| chr4 | TCONS_00056333 | XLOC_049916 | 6943626  | 6943859  | + | 1 | NA           | CUFF.7569 NA            | u | TSS5306 | 1.837E-16 |
| chr4 | TCONS_00056349 | XLOC_049932 | 7044796  | 7045008  | + | 1 | NA           | CUFF.7576 NA            | u | TSS5308 | 3.646E-75 |
| chr4 | TCONS_00056362 | XLOC_049945 | 7158858  | 7159063  | + | 1 | OS04G0206600 | CUFF.7582 OS04T02066(x  |   | TSS5309 | 0         |
| chr4 | TCONS_00056441 | XLOC_050022 | 8032369  | 8032729  | + | 1 | NA           | CUFF.7593 NA            | u | TSS5317 | 3.935E-46 |
| chr4 | TCONS_00056463 | XLOC_050044 | 8277341  | 8277865  | + | 1 | NA           | CUFF.7608 NA            | u | TSS5319 | 2.492E-17 |
| chr4 | TCONS_00064166 | XLOC_050050 | 8312079  | 8312429  | + | 1 | OS04G0224900 | CUFF.9810 OS04T02249(x  |   | TSS5320 | 2.229E-54 |
| chr4 | TCONS_00056517 | XLOC_050093 | 8852130  | 8852358  | + | 1 | NA           | CUFF.7620 NA            | u | TSS5324 | 7.659E-27 |
| chr4 | TCONS_00064168 | XLOC_050094 | 8852664  | 8852867  | + | 1 | NA           | CUFF.9818 NA            | u | TSS5324 | 2.869E-25 |
| chr4 | TCONS_00056590 | XLOC_050160 | 9329737  | 9329965  | + | 1 | NA           | CUFF.7624 NA            | u | TSS5331 | 9.037E-25 |
| chr4 | TCONS_00064170 | XLOC_050165 | 9367617  | 9367867  | + | 1 | NA           | CUFF.9830 NA            | u | TSS5331 | 1.25E-16  |
| chr4 | TCONS_00064175 | XLOC_050197 | 9915286  | 9915495  | + | 1 | OS04G0252200 | CUFF.9872 OS04T02522(i  |   | TSS5335 | 4.639E-47 |
| chr4 | TCONS_00056662 | XLOC_050242 | 10702961 | 10703161 | + | 1 | NA           | CUFF.7636 NA            | u | TSS5339 | 0         |
| chr4 | TCONS_00064180 | XLOC_050253 | 10985386 | 10985689 | + | 1 | OS04G0266400 | CUFF.9858 OS04T02664(i  |   | TSS5340 | 1.063E-19 |
| chr4 | TCONS_00064188 | XLOC_050307 | 11547842 | 11548150 | + | 1 | NA           | CUFF.9866 NA            | u | TSS5346 | 2.02E-19  |
| chr4 | TCONS_00064191 | XLOC_050334 | 11809636 | 11809846 | + | 1 | OS04G0278900 | CUFF.9888 OS04T02789(i  |   | TSS5349 | 4.203E-26 |
| chr4 | TCONS_00064192 | XLOC_050345 | 12036039 | 12036490 | + | 1 | OS04G0282000 | CUFF.9884 OS04T02820(i  |   | TSS5350 | 4.359E-41 |
| chr4 | TCONS_00064194 | XLOC_050360 | 12208571 | 12208777 | + | 1 | NA           | CUFF.9882 NA            | u | TSS5352 | 2.638E-18 |
| chr4 | TCONS_00056783 | XLOC_050361 | 12210017 | 12210217 | + | 1 | NA           | CUFF.7656 NA            | u | TSS5352 | 0         |
| chr4 | TCONS_00056820 | XLOC_050396 | 12546046 | 12546335 | + | 1 | NA           | CUFF.7669 NA            | u | TSS5355 | 1.714E-86 |
| chr4 | TCONS_00056899 | XLOC_050474 | 13513544 | 13513782 | + | 1 | NA           | CUFF.7682 NA            | u | TSS5363 | 2.137E-60 |
| chr4 | TCONS_00056912 | XLOC_050489 | 13641317 | 13641518 | + | 1 | NA           | CUFF.7685 NA            | u | TSS5365 | 8.413E-63 |
| chr4 | TCONS_00064210 | XLOC_050564 | 14453326 | 14453710 | + | 1 | OS04G0316200 | CUFF.9950 OS04T03162(x  |   | TSS5373 | 0.0055829 |
| chr4 | TCONS_00057031 | XLOC_050604 | 14822663 | 14822876 | + | 1 | OS04G0321800 | CUFF.7712 OS04T03218(i  |   | TSS5377 | 3.488E-37 |
| chr4 | TCONS_00057130 | XLOC_050702 | 16026297 | 16026525 | + | 1 | NA           | CUFF.7731 NA            | u | TSS5387 | 5.132E-32 |

|      |                |             |          |          |   |   |              |                        |   |         |           |
|------|----------------|-------------|----------|----------|---|---|--------------|------------------------|---|---------|-----------|
| chr4 | TCONS_00064217 | XLOC_050704 | 16031157 | 16031362 | + | 1 | NA           | CUFF.9985 NA           | u | TSS5387 | 1.19E-21  |
| chr4 | TCONS_00064218 | XLOC_050705 | 16032255 | 16032457 | + | 1 | NA           | CUFF.9986 NA           | u | TSS5387 | 1.335E-33 |
| chr4 | TCONS_00057134 | XLOC_050710 | 16038703 | 16038925 | + | 1 | NA           | CUFF.7735 NA           | u | TSS5388 | 5.616E-52 |
| chr4 | TCONS_00057135 | XLOC_050712 | 16039298 | 16039537 | + | 1 | NA           | CUFF.7734 NA           | u | TSS5388 | 0.012046  |
| chr4 | TCONS_00064224 | XLOC_050713 | 16039783 | 16040036 | + | 1 | NA           | CUFF.9980 NA           | u | TSS5388 | 2.217E-31 |
| chr4 | TCONS_00057136 | XLOC_050714 | 16040389 | 16040710 | + | 1 | NA           | CUFF.7739 NA           | u | TSS5389 | 4.403E-78 |
| chr4 | TCONS_00057137 | XLOC_050715 | 16041597 | 16041811 | + | 1 | NA           | CUFF.7738 NA           | u | TSS5389 | 8.469E-41 |
| chr4 | TCONS_00057139 | XLOC_050719 | 16044069 | 16044441 | + | 1 | NA           | CUFF.7741 NA           | u | TSS5389 | 1.764E-16 |
| chr4 | TCONS_00064228 | XLOC_050719 | 16044182 | 16044528 | + | 1 | NA           | CUFF.9987 NA           | u | TSS5389 | 0.33105   |
| chr4 | TCONS_00064236 | XLOC_050763 | 16482361 | 16482718 | + | 1 | NA           | CUFF.9999 NA           | u | TSS5394 | 1.168E-26 |
| chr4 | TCONS_00057178 | XLOC_050764 | 16483160 | 16483406 | + | 1 | NA           | CUFF.7746 NA           | u | TSS5394 | 4.606E-19 |
| chr4 | TCONS_00057228 | XLOC_050814 | 16865403 | 16865647 | + | 1 | NA           | CUFF.7761 NA           | u | TSS5399 | 9.093E-16 |
| chr4 | TCONS_00057229 | XLOC_050815 | 16865867 | 16866164 | + | 1 | NA           | CUFF.7763 NA           | u | TSS5399 | 6.603E-24 |
| chr4 | TCONS_00057230 | XLOC_050816 | 16866247 | 16866867 | + | 1 | NA           | CUFF.7767 NA           | u | TSS5399 | 4.377E-12 |
| chr4 | TCONS_00057231 | XLOC_050817 | 16866928 | 16867520 | + | 1 | NA           | CUFF.7769 NA           | u | TSS5399 | 0.32409   |
| chr4 | TCONS_00057232 | XLOC_050818 | 16867628 | 16867954 | + | 1 | NA           | CUFF.7766 NA           | u | TSS5400 | 4.455E-39 |
| chr4 | TCONS_00064244 | XLOC_050819 | 16868223 | 16869248 | + | 1 | NA           | CUFF.1001 NA           | u | TSS5400 | 4.701E-06 |
| chr4 | TCONS_00057245 | XLOC_050833 | 16995486 | 16995707 | + | 1 | OS04G0355401 | CUFF.7775 OS04T03554(x |   | TSS5401 | 1.05E-27  |
| chr4 | TCONS_00064248 | XLOC_050873 | 17440638 | 17440970 | + | 1 | NA           | CUFF.1002 NA           | u | TSS5405 | 2.851E-53 |
| chr4 | TCONS_00064249 | XLOC_050874 | 17441380 | 17441917 | + | 1 | NA           | CUFF.1003 NA           | u | TSS5405 | 1.508E-30 |
| chr4 | TCONS_00057328 | XLOC_050912 | 17945044 | 17945343 | + | 1 | NA           | CUFF.7778 NA           | u | TSS5409 | 0         |
| chr4 | TCONS_00057329 | XLOC_050913 | 17945550 | 17946047 | + | 1 | NA           | CUFF.7782 NA           | u | TSS5409 | 0         |
| chr4 | TCONS_00057330 | XLOC_050914 | 17950450 | 17950714 | + | 1 | NA           | CUFF.7786 NA           | u | TSS5409 | 8.985E-35 |
| chr4 | TCONS_00064250 | XLOC_050915 | 17950985 | 17951295 | + | 1 | NA           | CUFF.1003 NA           | u | TSS5409 | 2.638E-18 |
| chr4 | TCONS_00057334 | XLOC_050919 | 17954622 | 17955037 | + | 1 | NA           | CUFF.7793 NA           | u | TSS5410 | 0         |
| chr4 | TCONS_00057335 | XLOC_050920 | 17958451 | 17958716 | + | 1 | NA           | CUFF.7795 NA           | u | TSS5410 | 0         |
| chr4 | TCONS_00057336 | XLOC_050922 | 17958949 | 17959403 | + | 1 | NA           | CUFF.7797 NA           | u | TSS5410 | 2.177E-22 |
| chr4 | TCONS_00057343 | XLOC_050929 | 18047398 | 18047623 | + | 1 | OS04G0370900 | CUFF.7808 OS04T03709(i |   | TSS5411 | 6.816E-66 |
| chr4 | TCONS_00057350 | XLOC_050938 | 18078500 | 18078741 | + | 1 | NA           | CUFF.7785 NA           | u | TSS5412 | 2.839E-56 |
| chr4 | TCONS_00057351 | XLOC_050939 | 18083220 | 18083541 | + | 1 | NA           | CUFF.7789 NA           | u | TSS5412 | 0         |
| chr4 | TCONS_00064256 | XLOC_050939 | 18083457 | 18083668 | + | 1 | NA           | CUFF.1004 NA           | u | TSS5412 | 3.69E-29  |
| chr4 | TCONS_00057384 | XLOC_050969 | 18370187 | 18370400 | + | 1 | OS04G0376000 | CUFF.7803 OS04T03760(i |   | TSS5415 | 1.237E-35 |
| chr4 | TCONS_00057423 | XLOC_051008 | 18605724 | 18606150 | + | 1 | OS04G0380300 | CUFF.7829 OS04T03803(i |   | TSS5419 | 6.072E-06 |
| chr4 | TCONS_00064265 | XLOC_051009 | 18606571 | 18606975 | + | 1 | OS04G0380300 | CUFF.1009 OS04T03803(i |   | TSS5419 | 1.037E-34 |
| chr4 | TCONS_00057428 | XLOC_051014 | 18662040 | 18662258 | + | 1 | OS04G0381000 | CUFF.7827 OS04T03810(x |   | TSS5420 | 1.073E-53 |

|      |                |             |          |          |   |   |              |                        |         |                   |
|------|----------------|-------------|----------|----------|---|---|--------------|------------------------|---------|-------------------|
| chr4 | TCONS_00057443 | XLOC_051028 | 18750836 | 18751167 | + | 1 | OS04G0382300 | CUFF.7838 OS04T03823(i | TSS5421 | 0.4891            |
| chr4 | TCONS_00064266 | XLOC_051028 | 18750956 | 18751330 | + | 1 | OS04G0382300 | CUFF.1009 OS04T03823(i | TSS5421 | 2.216E-26         |
| chr4 | TCONS_00064267 | XLOC_051029 | 18755795 | 18755998 | + | 1 | NA           | CUFF.1008 NA           | u       | TSS5421 2.638E-18 |
| chr4 | TCONS_00057462 | XLOC_051044 | 18905194 | 18905398 | + | 1 | NA           | CUFF.7833 NA           | u       | TSS5423 5.432E-58 |
| chr4 | TCONS_00064268 | XLOC_051044 | 18905003 | 18905205 | + | 1 | NA           | CUFF.1008 NA           | u       | TSS5423 3.414E-08 |
| chr4 | TCONS_00064271 | XLOC_051065 | 19114107 | 19114329 | + | 1 | OS04G0388601 | CUFF.1010 OS04T03886(i | TSS5425 | 5.01E-43          |
| chr4 | TCONS_00064272 | XLOC_051069 | 19138338 | 19138543 | + | 1 | OS04G0388900 | CUFF.1009 OS04T03889(i | TSS5426 | 1.19E-21          |
| chr4 | TCONS_00057508 | XLOC_051086 | 19242502 | 19242707 | + | 1 | OS04G0391000 | CUFF.7847 OS04T03910(x | TSS5428 | 0                 |
| chr4 | TCONS_00064276 | XLOC_051112 | 19398528 | 19398905 | + | 1 | OS04G0394500 | CUFF.1011 OS04T03945(x | TSS5430 | 2.064E-44         |
| chr4 | TCONS_00064277 | XLOC_051113 | 19402201 | 19402438 | + | 1 | NA           | CUFF.1010 NA           | u       | TSS5431 0.0003675 |
| chr4 | TCONS_00064280 | XLOC_051132 | 19603747 | 19603947 | + | 1 | NA           | CUFF.1011 NA           | u       | TSS5433 6.994E-29 |
| chr4 | TCONS_00057557 | XLOC_051135 | 19605337 | 19605550 | + | 1 | NA           | CUFF.7879 NA           | u       | TSS5433 0         |
| chr4 | TCONS_00064284 | XLOC_051141 | 19614730 | 19615047 | + | 1 | NA           | CUFF.1012 NA           | u       | TSS5434 5.592E-20 |
| chr4 | TCONS_00057580 | XLOC_051156 | 19686065 | 19686280 | + | 1 | OS04G0398500 | CUFF.7876 OS04T03985(i | TSS5436 | 4.746E-33         |
| chr4 | TCONS_00057598 | XLOC_051174 | 19821926 | 19822138 | + | 1 | OS04G0400700 | CUFF.1013 OS04T04007(x | TSS5437 | 8.948E-25         |
| chr4 | TCONS_00064286 | XLOC_051176 | 19852962 | 19853209 | + | 1 | OS04G0401300 | CUFF.1014 OS04T04013(i | TSS5438 | 2.654E-11         |
| chr4 | TCONS_00064290 | XLOC_051203 | 20129964 | 20130270 | + | 1 | OS04G0405600 | CUFF.1015 OS04T04056(x | TSS5440 | 1.027E-29         |
| chr4 | TCONS_00064292 | XLOC_051223 | 20261598 | 20261799 | + | 1 | OS04G0410250 | CUFF.1017 OS04T04102(x | TSS5442 | 1.339E-23         |
| chr4 | TCONS_00057687 | XLOC_051260 | 20434101 | 20434379 | + | 1 | NCRNA_9385   | CUFF.7965 NCRNA_938.x  | TSS5446 | 0                 |
| chr4 | TCONS_00064302 | XLOC_051358 | 21228051 | 21228416 | + | 1 | OS04G0428900 | CUFF.1019 OS04T04289(i | TSS5457 | 3.301E-22         |
| chr4 | TCONS_00057827 | XLOC_051400 | 21468119 | 21468348 | + | 1 | OS04G0432600 | CUFF.7949 OS04T04326(i | TSS5461 | 3.19E-28          |
| chr4 | TCONS_00057836 | XLOC_051410 | 21621996 | 21622240 | + | 1 | NA           | CUFF.7948 NA           | u       | TSS5462 1.842E-12 |
| chr4 | TCONS_00064312 | XLOC_051411 | 21625671 | 21625968 | + | 1 | APX7         | CUFF.1024 OS04T04348(i | TSS5462 | 7.297E-19         |
| chr4 | TCONS_00064314 | XLOC_051457 | 21817307 | 21817586 | + | 1 | NA           | CUFF.1024 NA           | u       | TSS5467 1.037E-34 |
| chr4 | TCONS_00057943 | XLOC_051519 | 22248629 | 22248940 | + | 1 | OS04G0446300 | CUFF.7989 OS04T04463(i | TSS5473 | 8.252E-13         |
| chr4 | TCONS_00064322 | XLOC_051538 | 22356522 | 22356859 | + | 1 | OS04G0448600 | CUFF.1028 OS04T04486(i | TSS5476 | 3.258E-32         |
| chr4 | TCONS_00064325 | XLOC_051549 | 22398461 | 22398693 | + | 1 | OS04G0449500 | CUFF.1030 OS04T04495(x | TSS5477 | 9.952E-87         |
| chr4 | TCONS_00057997 | XLOC_051567 | 22537632 | 22537950 | + | 1 | OS04G0452000 | CUFF.8029 OS04T04520(i | TSS5479 | 1.182E-48         |
| chr4 | TCONS_00064326 | XLOC_051568 | 22538828 | 22539073 | + | 1 | OS04G0452000 | CUFF.1031 OS04T04520(i | TSS5479 | 2.005E-39         |
| chr4 | TCONS_00057998 | XLOC_051569 | 22539938 | 22540384 | + | 1 | OS04G0452000 | CUFF.8027 OS04T04520(x | TSS5479 | 0.040487          |
| chr4 | TCONS_00058030 | XLOC_051598 | 22800576 | 22800787 | + | 1 | OS04G0455700 | CUFF.1031 OS04T04557(x | TSS5482 | 0                 |
| chr4 | TCONS_00064328 | XLOC_051599 | 22803538 | 22803823 | + | 1 | LIP1         | CUFF.1031 OS04T04558(i | TSS5482 | 1.265E-07         |
| chr4 | TCONS_00064329 | XLOC_051600 | 22809137 | 22809528 | + | 1 | OS04G0455900 | CUFF.1032 OS04T04559(x | TSS5482 | 6.994E-29         |
| chr4 | TCONS_00064332 | XLOC_051645 | 23050822 | 23051036 | + | 1 | OS04G0461400 | CUFF.1034 OS04T04614(i | TSS5487 | 0                 |
| chr4 | TCONS_00064334 | XLOC_051647 | 23052365 | 23052764 | + | 1 | OS04G0461400 | CUFF.1035 OS04T04614(i | TSS5487 | 3.453E-17         |

|      |                |             |          |          |   |   |              |                        |   |         |           |
|------|----------------|-------------|----------|----------|---|---|--------------|------------------------|---|---------|-----------|
| chr4 | TCONS_00064339 | XLOC_051680 | 23310973 | 23311184 | + | 1 | NA           | CUFF.1033 NA           | u | TSS5491 | 3.718E-24 |
| chr4 | TCONS_00064340 | XLOC_051686 | 23335214 | 23335446 | + | 1 | OS04G0467100 | CUFF.1034 OS04T04671(i |   | TSS5491 | 6.604E-06 |
| chr4 | TCONS_00064341 | XLOC_051687 | 23336108 | 23336398 | + | 1 | OS04G0467100 | CUFF.1034 OS04T04671(i |   | TSS5491 | 1.19E-21  |
| chr4 | TCONS_00064346 | XLOC_051721 | 23546022 | 23546496 | + | 1 | OS04G0471300 | CUFF.1035 OS04T04713(i |   | TSS5495 | 6.161E-27 |
| chr4 | TCONS_00058168 | XLOC_051741 | 23662383 | 23662604 | + | 1 | OS04G0473400 | CUFF.8079 OS04T04734(x |   | TSS5497 | 4.56E-44  |
| chr4 | TCONS_00058171 | XLOC_051745 | 23719714 | 23719960 | + | 1 | OS04G0474300 | CUFF.8078 OS04T04743(i |   | TSS5497 | 2.373E-22 |
| chr4 | TCONS_00058186 | XLOC_051761 | 23813426 | 23813630 | + | 1 | NA           | CUFF.8084 NA           | u | TSS5499 | 4.746E-33 |
| chr4 | TCONS_00058191 | XLOC_051767 | 23833367 | 23833860 | + | 1 | NA           | CUFF.8096 NA           | u | TSS5500 | 3.206E-08 |
| chr4 | TCONS_00064355 | XLOC_051768 | 23834679 | 23835071 | + | 1 | NA           | CUFF.1037 NA           | u | TSS5500 | 7.736E-44 |
| chr4 | TCONS_00058192 | XLOC_051769 | 23835458 | 23835785 | + | 1 | NA           | CUFF.8098 NA           | u | TSS5500 | 5.781E-22 |
| chr4 | TCONS_00064356 | XLOC_051769 | 23835544 | 23835858 | + | 1 | NA           | CUFF.1037 NA           | u | TSS5500 | 9.128E-05 |
| chr4 | TCONS_00064357 | XLOC_051770 | 23835910 | 23836232 | + | 1 | NA           | CUFF.1037 NA           | u | TSS5500 | 9.438E-19 |
| chr4 | TCONS_00058247 | XLOC_051827 | 24244542 | 24244747 | + | 1 | OS04G0485100 | CUFF.8118 OS04T04851(x |   | TSS5506 | 1.997E-78 |
| chr4 | TCONS_00064364 | XLOC_051855 | 24439497 | 24439765 | + | 1 | OS04G0489100 | CUFF.1042 OS04T04891(i |   | TSS5510 | 4.409E-59 |
| chr4 | TCONS_00064366 | XLOC_051863 | 24511475 | 24511682 | + | 1 | NA           | CUFF.1041 NA           | u | TSS5510 | 1.063E-19 |
| chr4 | TCONS_00064367 | XLOC_051865 | 24520895 | 24521281 | + | 1 | OS04G0490600 | CUFF.1044 OS04T04906(i |   | TSS5511 | 3.802E-12 |
| chr4 | TCONS_00058296 | XLOC_051869 | 24539272 | 24539476 | + | 1 | NA           | CUFF.8136 NA           | u | TSS5511 | 0         |
| chr4 | TCONS_00058297 | XLOC_051870 | 24540822 | 24541063 | + | 1 | NA           | CUFF.8137 NA           | u | TSS5511 | 7.777E-87 |
| chr4 | TCONS_00058317 | XLOC_051888 | 24658353 | 24658557 | + | 1 | OS04G0493100 | CUFF.8160 OS04T04931(i |   | TSS5513 | 0         |
| chr4 | TCONS_00064371 | XLOC_051894 | 24721642 | 24721874 | + | 1 | OS04G0494400 | CUFF.1044 OS04T04944(i |   | TSS5514 | 0.01177   |
| chr4 | TCONS_00064372 | XLOC_051900 | 24756183 | 24756403 | + | 1 | NA           | CUFF.1044 NA           | u | TSS5515 | 5.443E-25 |
| chr4 | TCONS_00064376 | XLOC_051917 | 24853074 | 24853278 | + | 1 | OS04G0496800 | CUFF.1045 OS04T04968(i |   | TSS5516 | 1.168E-26 |
| chr4 | TCONS_00058348 | XLOC_051920 | 24866800 | 24867005 | + | 1 | OS04G0497200 | CUFF.8163 OS04T04972(i |   | TSS5517 | 0         |
| chr4 | TCONS_00064380 | XLOC_051941 | 24983730 | 24984222 | + | 1 | NA           | CUFF.1046 NA           | u | TSS5519 | 2.851E-53 |
| chr4 | TCONS_00064381 | XLOC_051941 | 24984306 | 24984688 | + | 1 | NA           | CUFF.1046 NA           | u | TSS5519 | 0.005791  |
| chr4 | TCONS_00064382 | XLOC_051942 | 24985819 | 24986125 | + | 1 | NA           | CUFF.1046 NA           | u | TSS5519 | 1.549E-20 |
| chr4 | TCONS_00064387 | XLOC_051967 | 25199580 | 25199982 | + | 1 | OS04G0504800 | CUFF.1050 OS04T05048(x |   | TSS5522 | 0.0082532 |
| chr4 | TCONS_00058404 | XLOC_051973 | 25250335 | 25250550 | + | 1 | NA           | CUFF.8175 NA           | u | TSS5523 | 1.007E-43 |
| chr4 | TCONS_00064388 | XLOC_051974 | 25254692 | 25255508 | + | 1 | NA           | CUFF.1048 NA           | u | TSS5523 | 9.541E-18 |
| chr4 | TCONS_00064389 | XLOC_051975 | 25255966 | 25256222 | + | 1 | NA           | CUFF.1047 NA           | u | TSS5523 | 6.161E-27 |
| chr4 | TCONS_00064391 | XLOC_051978 | 25270038 | 25270249 | + | 1 | NA           | CUFF.1047 NA           | u | TSS5523 | 4.293E-21 |
| chr4 | TCONS_00064392 | XLOC_051979 | 25270601 | 25270943 | + | 1 | NA           | CUFF.1048 NA           | u | TSS5524 | 0.024257  |
| chr4 | TCONS_00058414 | XLOC_051988 | 25346728 | 25346962 | + | 1 | OS04G0507400 | CUFF.8180 OS04T05074(x |   | TSS5524 | 1.125E-08 |
| chr4 | TCONS_00064394 | XLOC_052005 | 25424076 | 25424297 | + | 1 | OS04G0508800 | CUFF.1050 OS04T05088(x |   | TSS5526 | 0         |
| chr4 | TCONS_00064395 | XLOC_052011 | 25465761 | 25465969 | + | 1 | OS04G0509100 | CUFF.1051 OS04T05091(i |   | TSS5527 | 5.016E-18 |

|      |                |             |          |          |   |   |              |                         |   |         |           |
|------|----------------|-------------|----------|----------|---|---|--------------|-------------------------|---|---------|-----------|
| chr4 | TCONS_00064397 | XLOC_052016 | 25486886 | 25487275 | + | 1 | NA           | CUFF.1049 NA            | u | TSS5528 | 3.802E-12 |
| chr4 | TCONS_00058449 | XLOC_052017 | 25487308 | 25487519 | + | 1 | NA           | CUFF.8202 NA            | u | TSS5528 | 1.444E-33 |
| chr4 | TCONS_00058487 | XLOC_052053 | 25826407 | 25826613 | + | 1 | NA           | CUFF.8221 NA            | u | TSS5531 | 4.402E-78 |
| chr4 | TCONS_00058496 | XLOC_052062 | 25857957 | 25858178 | + | 1 | OS04G0517300 | CUFF.8226 OS04T051730(x |   | TSS5532 | 8.32E-36  |
| chr4 | TCONS_00064401 | XLOC_052081 | 26028079 | 26028385 | + | 1 | OS04G0519925 | CUFF.1053 OS04T051992(x |   | TSS5534 | 1.222E-23 |
| chr4 | TCONS_00064402 | XLOC_052082 | 26029682 | 26029883 | + | 1 | OS04G0519925 | CUFF.1053 OS04T051992(x |   | TSS5534 | 2.943E-20 |
| chr4 | TCONS_00058551 | XLOC_052114 | 26260196 | 26260667 | + | 1 | OS04G0525100 | CUFF.8239 OS04T052510(x |   | TSS5538 | 1.672E-17 |
| chr4 | TCONS_00064408 | XLOC_052146 | 26508020 | 26508271 | + | 1 | OS04G0529800 | CUFF.1055 OS04T052980(i |   | TSS5541 | 5.016E-18 |
| chr4 | TCONS_00064409 | XLOC_052153 | 26534217 | 26534539 | + | 1 | OS04G0530500 | CUFF.1055 OS04T053050(i |   | TSS5542 | 4.203E-26 |
| chr4 | TCONS_00058591 | XLOC_052154 | 26534945 | 26535225 | + | 1 | OS04G0530500 | CUFF.8254 OS04T053050(i |   | TSS5542 | 2.178E-23 |
| chr4 | TCONS_00064410 | XLOC_052155 | 26541889 | 26542152 | + | 1 | OS04G0530600 | CUFF.1055 OS04T053060(i |   | TSS5542 | 9.077E-33 |
| chr4 | TCONS_00064411 | XLOC_052165 | 26613285 | 26613532 | + | 1 | OS04G0532100 | CUFF.1055 OS04T053210(x |   | TSS5543 | 2.638E-18 |
| chr4 | TCONS_00064412 | XLOC_052175 | 26667430 | 26667792 | + | 1 | OS04G0533300 | CUFF.1057 OS04T053330(i |   | TSS5544 | 1.65E-36  |
| chr4 | TCONS_00058624 | XLOC_052184 | 26718437 | 26718642 | + | 1 | OS04G0534500 | CUFF.8258 OS04T053450(i |   | TSS5546 | 0         |
| chr4 | TCONS_00064413 | XLOC_052189 | 26753853 | 26754221 | + | 1 | NA           | CUFF.1056 NA            | u | TSS5546 | 2.891E-35 |
| chr4 | TCONS_00064416 | XLOC_052201 | 26926219 | 26926555 | + | 1 | OS04G0538300 | CUFF.1056 OS04T053830(x |   | TSS5547 | 3.718E-24 |
| chr4 | TCONS_00064426 | XLOC_052237 | 27167446 | 27167816 | + | 1 | NA           | CUFF.1058 NA            | u | TSS5551 | 9.712E-11 |
| chr4 | TCONS_00058671 | XLOC_052239 | 27173969 | 27174177 | + | 1 | NA           | CUFF.8270 NA            | u | TSS5551 | 0         |
| chr4 | TCONS_00064428 | XLOC_052240 | 27174713 | 27175010 | + | 1 | NA           | CUFF.1058 NA            | u | TSS5552 | 1.61E-45  |
| chr4 | TCONS_00064429 | XLOC_052241 | 27176381 | 27176584 | + | 1 | NA           | CUFF.1059 NA            | u | TSS5552 | 8.337E-59 |
| chr4 | TCONS_00058705 | XLOC_052272 | 27368909 | 27369149 | + | 1 | NA           | CUFF.8288 NA            | u | TSS5555 | 2.523E-26 |
| chr4 | TCONS_00064434 | XLOC_052282 | 27431048 | 27431388 | + | 1 | OS04G0548100 | CUFF.1061 OS04T054810(x |   | TSS5556 | 7.056E-24 |
| chr4 | TCONS_00058733 | XLOC_052300 | 27558688 | 27559123 | + | 1 | BRE1A        | CUFF.8304 OS04T055040(i |   | TSS5558 | 2.753E-12 |
| chr4 | TCONS_00058773 | XLOC_052340 | 27802776 | 27803105 | + | 1 | NA           | CUFF.8306 NA            | u | TSS5562 | 8.469E-16 |
| chr4 | TCONS_00064443 | XLOC_052344 | 27806462 | 27806881 | + | 1 | OS04G0555600 | CUFF.1064 OS04T055560(x |   | TSS5563 | 5.677E-11 |
| chr4 | TCONS_00058805 | XLOC_052374 | 28032983 | 28033192 | + | 1 | OS04G0559550 | CUFF.8312 OS04T055955(x |   | TSS5566 | 0         |
| chr4 | TCONS_00064448 | XLOC_052378 | 28055564 | 28055767 | + | 1 | OS04G0559800 | CUFF.1065 OS04T055980(i |   | TSS5566 | 2.943E-20 |
| chr4 | TCONS_00058834 | XLOC_052403 | 28233263 | 28233494 | + | 1 | OS04G0563801 | CUFF.8325 OS04T056380(i |   | TSS5569 | 1.696E-26 |
| chr4 | TCONS_00058848 | XLOC_052417 | 28341334 | 28341557 | + | 1 | NA           | CUFF.8324 NA            | u | TSS5570 | 1.736E-41 |
| chr4 | TCONS_00058875 | XLOC_052441 | 28530445 | 28530665 | + | 1 | NA           | CUFF.8335 NA            | u | TSS5573 | 8.689E-46 |
| chr4 | TCONS_00058876 | XLOC_052442 | 28534759 | 28535007 | + | 1 | OS04G0567800 | CUFF.8343 OS04T056780(x |   | TSS5573 | 3.12E-07  |
| chr4 | TCONS_00064464 | XLOC_052475 | 28734431 | 28734647 | + | 1 | NA           | CUFF.1068 NA            | u | TSS5576 | 2.869E-25 |
| chr4 | TCONS_00064465 | XLOC_052476 | 28734805 | 28735008 | + | 1 | NA           | CUFF.1068 NA            | u | TSS5577 | 2.638E-18 |
| chr4 | TCONS_00064470 | XLOC_052525 | 29054090 | 29054576 | + | 1 | NA           | CUFF.1070 NA            | u | TSS5582 | 0.77224   |
| chr4 | TCONS_00058988 | XLOC_052553 | 29273832 | 29274261 | + | 1 | NA           | CUFF.8368 NA            | u | TSS5585 | 9.344E-20 |



|      |                |             |          |          |   |   |              |                        |   |         |           |
|------|----------------|-------------|----------|----------|---|---|--------------|------------------------|---|---------|-----------|
| chr4 | TCONS_00064477 | XLOC_052639 | 29894432 | 29894773 | + | 1 | NA           | CUFF.1074 NA           | u | TSS5594 | 0.002878  |
| chr4 | TCONS_00059101 | XLOC_052659 | 30050015 | 30050410 | + | 1 | OS04G0594400 | CUFF.8411 OS04T05944(i |   | TSS5596 | 1.14E-26  |
| chr4 | TCONS_00064481 | XLOC_052676 | 30173293 | 30173531 | + | 1 | OS04G0598000 | CUFF.1075 OS04T05980(i |   | TSS5598 | 6.901E-52 |
| chr4 | TCONS_00059133 | XLOC_052692 | 30285536 | 30285784 | + | 1 | OS04G0600100 | CUFF.8415 OS04T06001(x |   | TSS5600 | 3.386E-18 |
| chr4 | TCONS_00064482 | XLOC_052693 | 30288745 | 30288980 | + | 1 | OS04G0600200 | CUFF.1076 OS04T06002(i |   | TSS5600 | 5.104E-61 |
| chr4 | TCONS_00064484 | XLOC_052697 | 30367185 | 30367398 | + | 1 | OS04G0601500 | CUFF.1075 OS04T06015(x |   | TSS5600 | 6.994E-29 |
| chr4 | TCONS_00064487 | XLOC_052717 | 30481690 | 30481890 | + | 1 | NA           | CUFF.1076 NA           | u | TSS5602 | 1.387E-18 |
| chr4 | TCONS_00059160 | XLOC_052726 | 30554270 | 30554470 | + | 1 | OS04G0605300 | CUFF.8429 OS04T06053(i |   | TSS5603 | 6.037E-51 |
| chr4 | TCONS_00064490 | XLOC_052727 | 30557976 | 30558366 | + | 1 | OS04G0605300 | CUFF.1078 OS04T06053(x |   | TSS5603 | 2.869E-25 |
| chr4 | TCONS_00064491 | XLOC_052731 | 30606287 | 30606576 | + | 1 | NA           | CUFF.1077 NA           | u | TSS5604 | 1.136E-14 |
| chr4 | TCONS_00059173 | XLOC_052741 | 30627322 | 30627796 | + | 1 | OS04G0606400 | CUFF.8441 OS04T06064(i |   | TSS5605 | 0.21042   |
| chr4 | TCONS_00064492 | XLOC_052741 | 30627154 | 30627690 | + | 1 | OS04G0606400 | CUFF.1079 OS04T06064(i |   | TSS5605 | 1.18E-20  |
| chr4 | TCONS_00064493 | XLOC_052743 | 30630746 | 30631003 | + | 1 | OS04G0606425 | CUFF.1078 OS04T06064(i |   | TSS5605 | 4.824E-23 |
| chr4 | TCONS_00059181 | XLOC_052752 | 30695767 | 30696251 | + | 1 | OS04G0607100 | CUFF.8438 OS04T06071(i |   | TSS5606 | 3.403E-76 |
| chr4 | TCONS_00064498 | XLOC_052767 | 30806142 | 30806348 | + | 1 | OS04G0608600 | CUFF.1079 OS04T06086(x |   | TSS5607 | 2.638E-18 |
| chr4 | TCONS_00059201 | XLOC_052771 | 30827697 | 30827989 | + | 1 | OS04G0608900 | CUFF.8451 OS04T06089(x |   | TSS5608 | 9.688E-29 |
| chr4 | TCONS_00059207 | XLOC_052777 | 30855080 | 30855358 | + | 1 | OS04G0609200 | CUFF.8445 OS04T06092(x |   | TSS5608 | 4.216E-56 |
| chr4 | TCONS_00064500 | XLOC_052784 | 30894263 | 30894576 | + | 1 | OS04G0609700 | CUFF.1080 OS04T06097(i |   | TSS5609 | 0.0001116 |
| chr4 | TCONS_00064501 | XLOC_052785 | 30895574 | 30895876 | + | 1 | OS04G0609700 | CUFF.1080 OS04T06097(i |   | TSS5609 | 6.994E-29 |
| chr4 | TCONS_00064502 | XLOC_052787 | 30900282 | 30900749 | + | 1 | OS04G0609700 | CUFF.1081 OS04T06097(i |   | TSS5609 | 1.037E-34 |
| chr4 | TCONS_00064503 | XLOC_052788 | 30904196 | 30904535 | + | 1 | NA           | CUFF.1079 NA           | u | TSS5609 | 1.775E-08 |
| chr4 | TCONS_00064505 | XLOC_052796 | 30922842 | 30923070 | + | 1 | OS04G0610100 | CUFF.1080 OS04T06101(i |   | TSS5610 | 5.016E-18 |
| chr4 | TCONS_00064506 | XLOC_052801 | 30956451 | 30956651 | + | 1 | HAK15        | CUFF.1080 OS04T06107(i |   | TSS5611 | 3.249E-27 |
| chr4 | TCONS_00059246 | XLOC_052821 | 31065060 | 31065282 | + | 1 | COPE1        | CUFF.8467 OS04T06126(i |   | TSS5613 | 1.444E-33 |
| chr4 | TCONS_00064507 | XLOC_052831 | 31121821 | 31122279 | + | 1 | OS04G0613800 | CUFF.1081 OS04T06138(x |   | TSS5614 | 2.654E-11 |
| chr4 | TCONS_00059329 | XLOC_052904 | 31465466 | 31465927 | + | 1 | OS04G0619400 | CUFF.8520 OS04T06194(i |   | TSS5621 | 3.76E-72  |
| chr4 | TCONS_00059334 | XLOC_052910 | 31502610 | 31502823 | + | 1 | NA           | CUFF.8495 NA           | u | TSS5622 | 3.657E-47 |
| chr4 | TCONS_00064524 | XLOC_052917 | 31509957 | 31510196 | + | 1 | NA           | CUFF.1085 NA           | u | TSS5623 | 1.19E-21  |
| chr4 | TCONS_00064526 | XLOC_052920 | 31512894 | 31513156 | + | 1 | NA           | CUFF.1086 NA           | u | TSS5623 | 7.056E-24 |
| chr4 | TCONS_00064527 | XLOC_052921 | 31513287 | 31513857 | + | 1 | NA           | CUFF.1087 NA           | u | TSS5623 | 7.264E-12 |
| chr4 | TCONS_00059386 | XLOC_052966 | 31795432 | 31795907 | + | 1 | NA           | CUFF.8532 NA           | u | TSS5628 | 6.784E-58 |
| chr4 | TCONS_00064532 | XLOC_052966 | 31795707 | 31796124 | + | 1 | NA           | CUFF.1089 NA           | u | TSS5628 | 3.591E-39 |
| chr4 | TCONS_00064534 | XLOC_052968 | 31798130 | 31798428 | + | 1 | NA           | CUFF.1089 NA           | u | TSS5628 | 2.005E-39 |
| chr4 | TCONS_00059477 | XLOC_053047 | 32279548 | 32279754 | + | 1 | OS04G0634500 | CUFF.8556 OS04T06345(x |   | TSS5637 | 2.306E-10 |
| chr4 | TCONS_00064543 | XLOC_053048 | 32282368 | 32282696 | + | 1 | NA           | CUFF.1747 NA           | u | TSS5637 | 8.421E-32 |

|      |                |             |          |          |   |   |              |                        |         |           |           |
|------|----------------|-------------|----------|----------|---|---|--------------|------------------------|---------|-----------|-----------|
| chr4 | TCONS_00064546 | XLOC_053071 | 32377057 | 32377257 | + | 1 | OS04G0636600 | CUFF.1093 OS04T06366(i | TSS5639 | 1.387E-18 |           |
| chr4 | TCONS_00059524 | XLOC_053094 | 32585064 | 32585287 | + | 1 | OS04G0640600 | CUFF.8574 OS04T06406(i | TSS5642 | 1.05E-32  |           |
| chr4 | TCONS_00064550 | XLOC_053112 | 32673857 | 32674450 | + | 1 | OS04G0642000 | CUFF.1094 OS04T06420(x | TSS5643 | 6.316E-14 |           |
| chr4 | TCONS_00064551 | XLOC_053130 | 32809684 | 32809934 | + | 1 | OS04G0644675 | CUFF.1095 OS04T06446(x | TSS5645 | 3.712E-17 |           |
| chr4 | TCONS_00059568 | XLOC_053139 | 32883476 | 32883810 | + | 1 | NA           | CUFF.8591 NA           | u       | TSS5646   | 7.264E-12 |
| chr4 | TCONS_00064552 | XLOC_053139 | 32883565 | 32884030 | + | 1 | NA           | CUFF.1095 NA           | u       | TSS5646   | 4.812E-09 |
| chr4 | TCONS_00064553 | XLOC_053140 | 32884329 | 32885293 | + | 1 | NA           | CUFF.1095 NA           | u       | TSS5646   | 5.77E-14  |
| chr4 | TCONS_00059570 | XLOC_053141 | 32886819 | 32887396 | + | 1 | NA           | CUFF.8593 NA           | u       | TSS5646   | 4.128E-53 |
| chr4 | TCONS_00064555 | XLOC_053142 | 32887577 | 32888235 | + | 1 | NA           | CUFF.1096 NA           | u       | TSS5647   | 2.187E-07 |
| chr4 | TCONS_00064556 | XLOC_053143 | 32888512 | 32888935 | + | 1 | NA           | CUFF.1096 NA           | u       | TSS5647   | 4.497E-46 |
| chr4 | TCONS_00064557 | XLOC_053145 | 32891330 | 32891930 | + | 1 | NA           | CUFF.1096 NA           | u       | TSS5647   | 3.49E-12  |
| chr4 | TCONS_00064558 | XLOC_053151 | 32955580 | 32955990 | + | 1 | NA           | CUFF.1235 NA           | u       | TSS5648   | 8.155E-21 |
| chr4 | TCONS_00064565 | XLOC_053186 | 33176073 | 33176380 | + | 1 | OS04G0650900 | CUFF.1098 OS04T06509(x | TSS5652 | 1.17E-31  |           |
| chr4 | TCONS_00064567 | XLOC_053189 | 33178672 | 33178934 | + | 1 | NA           | CUFF.1098 NA           | u       | TSS5652   | 4.293E-21 |
| chr4 | TCONS_00064568 | XLOC_053196 | 33227783 | 33228145 | + | 1 | OS04G0652500 | CUFF.1098 OS04T06525(x | TSS5653 | 1.063E-19 |           |
| chr4 | TCONS_00059627 | XLOC_053197 | 33229065 | 33229302 | + | 1 | OS04G0652500 | CUFF.8606 OS04T06525(x | TSS5653 | 4.042E-30 |           |
| chr4 | TCONS_00064569 | XLOC_053201 | 33260077 | 33260445 | + | 1 | OS04G0652900 | CUFF.1099 OS04T06529(i | TSS5653 | 1.72E-32  |           |
| chr4 | TCONS_00064573 | XLOC_053214 | 33376271 | 33376816 | + | 1 | NA           | CUFF.1099 NA           | u       | TSS5655   | 1.643E-15 |
| chr4 | TCONS_00064577 | XLOC_053247 | 33627490 | 33627861 | + | 1 | GLN2         | CUFF.1101 OS04T06591(i | TSS5658 | 6.268E-22 |           |
| chr4 | TCONS_00064581 | XLOC_053258 | 33722320 | 33722787 | + | 1 | OS04G0660600 | CUFF.1102 OS04T06606(i | TSS5660 | 2.576E-38 |           |
| chr4 | TCONS_00059729 | XLOC_053300 | 34053930 | 34054142 | + | 1 | NA           | CUFF.8635 NA           | u       | TSS5664   | 1.696E-26 |
| chr4 | TCONS_00059735 | XLOC_053307 | 34073467 | 34073667 | + | 1 | OS04G0667500 | CUFF.8642 OS04T06675(x | TSS5665 | 0         |           |
| chr4 | TCONS_00064597 | XLOC_053329 | 34175227 | 34175483 | + | 1 | OS04G0670200 | CUFF.1106 OS04T06702(i | TSS5667 | 2.956E-40 |           |
| chr4 | TCONS_00064598 | XLOC_053330 | 34175590 | 34175872 | + | 1 | OS04G0670200 | CUFF.1106 OS04T06702(i | TSS5667 | 0.024257  |           |
| chr4 | TCONS_00064600 | XLOC_053337 | 34237999 | 34238267 | + | 1 | NA           | CUFF.1105 NA           | u       | TSS5668   | 0.01177   |
| chr4 | TCONS_00064606 | XLOC_053359 | 34418214 | 34418489 | + | 1 | OS04G0674300 | CUFF.1107 OS04T06743(i | TSS5670 | 9.158E-23 |           |
| chr4 | TCONS_00064610 | XLOC_053372 | 34497231 | 34497436 | + | 1 | NA           | CUFF.1108 NA           | u       | TSS5672   | 1.168E-26 |
| chr4 | TCONS_00059875 | XLOC_053444 | 35030889 | 35031129 | + | 1 | NA           | CUFF.8695 NA           | u       | TSS5680   | 2.1E-20   |
| chr4 | TCONS_00064621 | XLOC_053450 | 35091931 | 35092221 | + | 1 | OS04G0686650 | CUFF.1112 OS04T06866(x | TSS5680 | 1.549E-20 |           |
| chr4 | TCONS_00064622 | XLOC_053452 | 35102132 | 35102336 | + | 1 | NA           | CUFF.1111 NA           | u       | TSS5680   | 2.638E-18 |
| chr4 | TCONS_00064623 | XLOC_053457 | 35122368 | 35122577 | + | 1 | OS04G0687100 | CUFF.1112 OS04T06871(x | TSS5681 | 5.016E-18 |           |
| chr4 | TCONS_00064625 | XLOC_053486 | 35351855 | 35352283 | + | 1 | NCRNA_42406  | CUFF.1113 NCRNA_424(x  | TSS5684 | 0.0032438 |           |
| chr4 | TCONS_00059984 | XLOC_053547 | 326543   | 326783   | - | 1 | OS04G0105000 | CUFF.7443 OS04T01050(x | TSS5691 | 6.151E-12 |           |
| chr4 | TCONS_00060022 | XLOC_053582 | 611824   | 612198   | - | 1 | OS04G0110400 | CUFF.7448 OS04T01104(i | TSS5694 | 7.19E-05  |           |
| chr4 | TCONS_00060095 | XLOC_053645 | 1093716  | 1094016  | - | 1 | OS04G0118400 | CUFF.7481 OS04T01184(i | TSS5701 | 0.12416   |           |

|      |                |             |          |          |   |   |              |                        |   |         |           |
|------|----------------|-------------|----------|----------|---|---|--------------|------------------------|---|---------|-----------|
| chr4 | TCONS_00060140 | XLOC_053688 | 1613959  | 1614162  | - | 1 | NA           | CUFF.7475 NA           | u | TSS5706 | 6.786E-89 |
| chr4 | TCONS_00060145 | XLOC_053694 | 1634899  | 1635099  | - | 1 | NA           | CUFF.7478 NA           | u | TSS5706 | 0         |
| chr4 | TCONS_00060146 | XLOC_053695 | 1640152  | 1640548  | - | 1 | NA           | CUFF.7477 NA           | u | TSS5706 | 6.072E-25 |
| chr4 | TCONS_00064638 | XLOC_053709 | 1760153  | 1760358  | - | 1 | NA           | CUFF.9654 NA           | u | TSS5708 | 1.25E-16  |
| chr4 | TCONS_00064643 | XLOC_053817 | 3275081  | 3275281  | - | 1 | NA           | CUFF.9683 NA           | u | TSS5719 | 3.301E-22 |
| chr4 | TCONS_00064644 | XLOC_053828 | 3466574  | 3466949  | - | 1 | OS04G0150300 | CUFF.9693 OS04T01503(i |   | TSS5720 | 7.312E-24 |
| chr4 | TCONS_00064649 | XLOC_053884 | 4277241  | 4277513  | - | 1 | OS04G0162100 | CUFF.9707 OS04T01621(x |   | TSS5726 | 1.549E-20 |
| chr4 | TCONS_00060409 | XLOC_053958 | 4967807  | 4968014  | - | 1 | OS04G0173300 | CUFF.7535 OS04T01733(i |   | TSS5734 | 0         |
| chr4 | TCONS_00064661 | XLOC_054039 | 5808739  | 5808941  | - | 1 | OS04G0185500 | CUFF.9742 OS04T01855(i |   | TSS5742 | 1.527E-35 |
| chr4 | TCONS_00060508 | XLOC_054055 | 5986897  | 5987267  | - | 1 | NA           | CUFF.7551 NA           | u | TSS5744 | 4.809E-22 |
| chr4 | TCONS_00060509 | XLOC_054056 | 6011857  | 6012253  | - | 1 | NA           | CUFF.7554 NA           | u | TSS5744 | 0         |
| chr4 | TCONS_00060510 | XLOC_054057 | 6012309  | 6012560  | - | 1 | NA           | CUFF.7553 NA           | u | TSS5744 | 0         |
| chr4 | TCONS_00064664 | XLOC_054070 | 6308124  | 6308796  | - | 1 | OS04G0192350 | CUFF.9752 OS04T01923(i |   | TSS5745 | 1.241E-72 |
| chr4 | TCONS_00060527 | XLOC_054072 | 6324346  | 6324584  | - | 1 | NA           | CUFF.7555 NA           | u | TSS5746 | 6.863E-19 |
| chr4 | TCONS_00064667 | XLOC_054105 | 6683608  | 6683838  | - | 1 | NA           | CUFF.9763 NA           | u | TSS5749 | 1.512E-25 |
| chr4 | TCONS_00060652 | XLOC_054192 | 7912458  | 7912689  | - | 1 | NA           | CUFF.7589 NA           | u | TSS5758 | 4.21E-20  |
| chr4 | TCONS_00064673 | XLOC_054195 | 7914578  | 7915233  | - | 1 | OS04G0218400 | CUFF.9794 OS04T02184(x |   | TSS5759 | 1.066E-17 |
| chr4 | TCONS_00060657 | XLOC_054197 | 7930141  | 7930786  | - | 1 | NCRNA_35507  | CUFF.7599 NCRNA_355(x  |   | TSS5759 | 4.07E-13  |
| chr4 | TCONS_00060658 | XLOC_054199 | 7932318  | 7932611  | - | 1 | NA           | CUFF.7604 NA           | u | TSS5759 | 1.524E-18 |
| chr4 | TCONS_00064676 | XLOC_054199 | 7932023  | 7932333  | - | 1 | NA           | CUFF.9789 NA           | u | TSS5759 | 5.961E-15 |
| chr4 | TCONS_00064677 | XLOC_054202 | 7935116  | 7935347  | - | 1 | NA           | CUFF.9787 NA           | u | TSS5760 | 0.01177   |
| chr4 | TCONS_00064679 | XLOC_054249 | 8461458  | 8461754  | - | 1 | OS04G0226400 | CUFF.9825 OS04T02264(x |   | TSS5765 | 1.508E-30 |
| chr4 | TCONS_00064680 | XLOC_054257 | 8529406  | 8529871  | - | 1 | OS04G0227500 | CUFF.9814 OS04T02275(i |   | TSS5765 | 3.453E-17 |
| chr4 | TCONS_00064681 | XLOC_054294 | 9103678  | 9103974  | - | 1 | NA           | CUFF.1649 NA           | u | TSS5769 | 2.823E-29 |
| chr4 | TCONS_00060754 | XLOC_054295 | 9106206  | 9107692  | - | 1 | NA           | CUFF.8097 NA           | u | TSS5769 | 2.509E-33 |
| chr4 | TCONS_00060794 | XLOC_054329 | 9193444  | 9194026  | - | 1 | NA           | CUFF.8117 NA           | u | TSS5773 | 4.692E-23 |
| chr4 | TCONS_00064687 | XLOC_054347 | 9342854  | 9343088  | - | 1 | OS04G0244400 | CUFF.9837 OS04T02444(i |   | TSS5775 | 1.742E-55 |
| chr4 | TCONS_00060842 | XLOC_054378 | 9798497  | 9798835  | - | 1 | NA           | CUFF.7632 NA           | u | TSS5778 | 1.173E-46 |
| chr4 | TCONS_00060843 | XLOC_054379 | 9800164  | 9800393  | - | 1 | NA           | CUFF.7627 NA           | u | TSS5778 | 8.985E-35 |
| chr4 | TCONS_00064690 | XLOC_054382 | 9834844  | 9835355  | - | 1 | NA           | CUFF.9851 NA           | u | TSS5778 | 0.79967   |
| chr4 | TCONS_00060846 | XLOC_054383 | 9835976  | 9836428  | - | 1 | NA           | CUFF.7630 NA           | u | TSS5778 | 1.967E-29 |
| chr4 | TCONS_00064693 | XLOC_054462 | 11256124 | 11256437 | - | 1 | OS04G0269800 | CUFF.9859 OS04T02698(x |   | TSS5787 | 2.943E-20 |
| chr4 | TCONS_00060932 | XLOC_054466 | 11278094 | 11278481 | - | 1 | OS04G0270100 | CUFF.7648 OS04T02701(i |   | TSS5787 | 2.223E-43 |
| chr4 | TCONS_00064699 | XLOC_054525 | 12119745 | 12119946 | - | 1 | NA           | CUFF.9876 NA           | u | TSS5793 | 1.855E-47 |
| chr4 | TCONS_00064700 | XLOC_054526 | 12121730 | 12121936 | - | 1 | NA           | CUFF.9877 NA           | u | TSS5793 | 2.638E-18 |

|      |                |             |          |          |   |   |              |           |              |         |           |
|------|----------------|-------------|----------|----------|---|---|--------------|-----------|--------------|---------|-----------|
| chr4 | TCONS_00064705 | XLOC_054571 | 12648398 | 12648602 | - | 1 | OS04G0290800 | CUFF.9908 | OS04T02908(x | TSS5798 | 2.514E-28 |
| chr4 | TCONS_00064708 | XLOC_054606 | 13039868 | 13040081 | - | 1 | NA           | CUFF.9910 | NA u         | TSS5801 | 4.53E-16  |
| chr4 | TCONS_00064709 | XLOC_054617 | 13208390 | 13208672 | - | 1 | OS04G0298600 | CUFF.9922 | OS04T02986(i | TSS5802 | 1.256E-46 |
| chr4 | TCONS_00061079 | XLOC_054618 | 13211941 | 13212300 | - | 1 | OS04G0298600 | CUFF.7683 | OS04T02986(i | TSS5802 | 4.897E-10 |
| chr4 | TCONS_00064710 | XLOC_054638 | 13588765 | 13589177 | - | 1 | NA           | CUFF.9919 | NA u         | TSS5804 | 2.863E-13 |
| chr4 | TCONS_00061152 | XLOC_054681 | 14084541 | 14084771 | - | 1 | NA           | CUFF.7695 | NA u         | TSS5809 | 5.596E-36 |
| chr4 | TCONS_00064712 | XLOC_054682 | 14090297 | 14090538 | - | 1 | NA           | CUFF.9937 | NA u         | TSS5810 | 5.596E-40 |
| chr4 | TCONS_00064714 | XLOC_054686 | 14093028 | 14093318 | - | 1 | NA           | CUFF.9931 | NA u         | TSS5810 | 3.718E-24 |
| chr4 | TCONS_00061155 | XLOC_054688 | 14095018 | 14095227 | - | 1 | OS04G0311100 | CUFF.7700 | OS04T03111(x | TSS5810 | 0         |
| chr4 | TCONS_00064716 | XLOC_054693 | 14159856 | 14160178 | - | 1 | NA           | CUFF.9939 | NA u         | TSS5811 | 1.643E-15 |
| chr4 | TCONS_00064719 | XLOC_054713 | 14377155 | 14377367 | - | 1 | NA           | CUFF.9946 | NA u         | TSS5813 | 1.307E-09 |
| chr4 | TCONS_00061297 | XLOC_054824 | 15879871 | 15880220 | - | 1 | OS04G0337300 | CUFF.7730 | OS04T03373(x | TSS5824 | 8.039E-75 |
| chr4 | TCONS_00061349 | XLOC_054877 | 16540118 | 16540329 | - | 1 | OS04G0347600 | CUFF.7750 | OS04T03476(x | TSS5830 | 1.518E-82 |
| chr4 | TCONS_00061367 | XLOC_054895 | 16691230 | 16691448 | - | 1 | OS04G0350000 | CUFF.7765 | OS04T03500(i | TSS5832 | 9.688E-29 |
| chr4 | TCONS_00064732 | XLOC_055015 | 18136072 | 18136273 | - | 1 | OS04G0372100 | CUFF.1005 | OS04T03721(x | TSS5844 | 1.527E-35 |
| chr4 | TCONS_00061503 | XLOC_055036 | 18325173 | 18325403 | - | 1 | NA           | CUFF.7801 | NA u         | TSS5846 | 2.321E-32 |
| chr4 | TCONS_00061519 | XLOC_055053 | 18468726 | 18468943 | - | 1 | OS04G0378200 | CUFF.7816 | OS04T03782(x | TSS5848 | 9.843E-39 |
| chr4 | TCONS_00064737 | XLOC_055054 | 18469173 | 18469485 | - | 1 | OS04G0378200 | CUFF.1006 | OS04T03782(x | TSS5848 | 2.217E-31 |
| chr4 | TCONS_00064739 | XLOC_055056 | 18470596 | 18470804 | - | 1 | OS04G0378200 | CUFF.1007 | OS04T03782(x | TSS5848 | 9.234E-38 |
| chr4 | TCONS_00061524 | XLOC_055060 | 18477379 | 18477656 | - | 1 | NCRNA_37981  | CUFF.7813 | NCRNA_379(x  | TSS5848 | 9.708E-34 |
| chr4 | TCONS_00061528 | XLOC_055063 | 18494076 | 18494283 | - | 1 | OS04G0378575 | CUFF.7824 | OS04T03785(x | TSS5849 | 9.705E-78 |
| chr4 | TCONS_00064744 | XLOC_055095 | 18736290 | 18736550 | - | 1 | OS04G0382100 | CUFF.1007 | OS04T03821(x | TSS5852 | 1.795E-42 |
| chr4 | TCONS_00061561 | XLOC_055097 | 18743158 | 18743375 | - | 1 | OS04G0382200 | CUFF.7831 | OS04T03822(x | TSS5852 | 3.19E-28  |
| chr4 | TCONS_00061575 | XLOC_055113 | 18937948 | 18938244 | - | 1 | NA           | CUFF.7835 | NA u         | TSS5854 | 0.0004644 |
| chr4 | TCONS_00061576 | XLOC_055114 | 18939067 | 18939283 | - | 1 | NA           | CUFF.7836 | NA u         | TSS5854 | 4.065E-35 |
| chr4 | TCONS_00064747 | XLOC_055121 | 19050598 | 19050810 | - | 1 | NA           | CUFF.1008 | NA u         | TSS5855 | 4.53E-16  |
| chr4 | TCONS_00064748 | XLOC_055133 | 19113571 | 19113820 | - | 1 | OS04G0388601 | CUFF.1010 | OS04T03886(i | TSS5856 | 1.775E-08 |
| chr4 | TCONS_00061596 | XLOC_055135 | 19130261 | 19130651 | - | 1 | OS04G0388800 | CUFF.7839 | OS04T03888(x | TSS5856 | 2.614E-49 |
| chr4 | TCONS_00061602 | XLOC_055142 | 19228436 | 19228653 | - | 1 | NA           | CUFF.7842 | NA u         | TSS5857 | 3.407E-59 |
| chr4 | TCONS_00064751 | XLOC_055159 | 19379257 | 19379522 | - | 1 | OS04G0394200 | CUFF.1011 | OS04T03942(i | TSS5858 | 5.01E-43  |
| chr4 | TCONS_00061626 | XLOC_055164 | 19412006 | 19412207 | - | 1 | OS04G0394700 | CUFF.7856 | OS04T03947(i | TSS5859 | 2.223E-43 |
| chr4 | TCONS_00061627 | XLOC_055165 | 19415163 | 19415415 | - | 1 | OS04G0394700 | CUFF.7858 | OS04T03947(i | TSS5859 | 0         |
| chr4 | TCONS_00061637 | XLOC_055173 | 19493718 | 19493938 | - | 1 | OS04G0395800 | CUFF.7860 | OS04T03958(i | TSS5860 | 4.641E-32 |
| chr4 | TCONS_00064756 | XLOC_055234 | 20007015 | 20007223 | - | 1 | NA           | CUFF.1014 | NA u         | TSS5866 | 3.159E-08 |
| chr4 | TCONS_00064760 | XLOC_055277 | 20256922 | 20257177 | - | 1 | OS04G0409900 | CUFF.1016 | OS04T04099(x | TSS5871 | 1.099E-39 |

|      |                |             |          |          |   |   |              |                        |     |         |           |
|------|----------------|-------------|----------|----------|---|---|--------------|------------------------|-----|---------|-----------|
| chr4 | TCONS_00064766 | XLOC_055318 | 20544232 | 20544593 | - | 1 | NA           | CUFF.1017 NA           | u   | TSS5875 | 1.187E-36 |
| chr4 | TCONS_00061782 | XLOC_055322 | 20550968 | 20551190 | - | 1 | OS04G0416100 | CUFF.7914 OS04T0416100 | (i) | TSS5875 | 5.132E-32 |
| chr4 | TCONS_00064769 | XLOC_055331 | 20589028 | 20589231 | - | 1 | NA           | CUFF.1018 NA           | u   | TSS5876 | 2.859E-30 |
| chr4 | TCONS_00061798 | XLOC_055339 | 20625649 | 20625855 | - | 1 | OS04G0417600 | CUFF.7916 OS04T0417600 | (x) | TSS5877 | 0         |
| chr4 | TCONS_00061823 | XLOC_055365 | 20838569 | 20838784 | - | 1 | NA           | CUFF.7927 NA           | u   | TSS5880 | 2.544E-86 |
| chr4 | TCONS_00061827 | XLOC_055369 | 20872525 | 20872757 | - | 1 | NA           | CUFF.7923 NA           | u   | TSS5880 | 3.716E-17 |
| chr4 | TCONS_00064776 | XLOC_055386 | 21021429 | 21021646 | - | 1 | NA           | CUFF.1019 NA           | u   | TSS5882 | 0.0006636 |
| chr4 | TCONS_00061865 | XLOC_055403 | 21257622 | 21257832 | - | 1 | NA           | CUFF.7925 NA           | u   | TSS5884 | 2.175E-38 |
| chr4 | TCONS_00061877 | XLOC_055415 | 21310946 | 21311156 | - | 1 | OS04G0429800 | CUFF.7939 OS04T0429800 | (x) | TSS5885 | 3.926E-57 |
| chr4 | TCONS_00061879 | XLOC_055419 | 21320451 | 21320652 | - | 1 | OS04G0429900 | CUFF.7935 OS04T0429900 | (x) | TSS5886 | 0         |
| chr4 | TCONS_00064784 | XLOC_055462 | 21630618 | 21630822 | - | 1 | NA           | CUFF.1023 NA           | u   | TSS5891 | 2.638E-18 |
| chr4 | TCONS_00064789 | XLOC_055526 | 22062016 | 22062351 | - | 1 | OS04G0442800 | CUFF.1026 OS04T0442800 | (x) | TSS5898 | 0.0029177 |
| chr4 | TCONS_00064790 | XLOC_055527 | 22063520 | 22063757 | - | 1 | NA           | CUFF.1024 NA           | u   | TSS5898 | 2.529E-33 |
| chr4 | TCONS_00064792 | XLOC_055529 | 22066958 | 22067650 | - | 1 | NA           | CUFF.1026 NA           | u   | TSS5899 | 6.268E-22 |
| chr4 | TCONS_00064793 | XLOC_055530 | 22067899 | 22068102 | - | 1 | NA           | CUFF.1025 NA           | u   | TSS5899 | 2.859E-30 |
| chr4 | TCONS_00062013 | XLOC_055531 | 22069792 | 22070025 | - | 1 | NA           | CUFF.7972 NA           | u   | TSS5899 | 1.05E-27  |
| chr4 | TCONS_00062025 | XLOC_055541 | 22091833 | 22092052 | - | 1 | OS04G0443500 | CUFF.7979 OS04T0443500 | (i) | TSS5900 | 9.642E-50 |
| chr4 | TCONS_00064800 | XLOC_055598 | 22364493 | 22364882 | - | 1 | OS04G0448800 | CUFF.1028 OS04T0448800 | (i) | TSS5906 | 0.47313   |
| chr4 | TCONS_00062098 | XLOC_055616 | 22436672 | 22437058 | - | 1 | OS04G0450300 | CUFF.8006 OS04T0450300 | (x) | TSS5908 | 0.70811   |
| chr4 | TCONS_00062116 | XLOC_055636 | 22595758 | 22595967 | - | 1 | OS04G0452600 | CUFF.8016 OS04T0452600 | (x) | TSS5910 | 3.022E-72 |
| chr4 | TCONS_00064808 | XLOC_055637 | 22599778 | 22600121 | - | 1 | OS04G0452700 | CUFF.1031 OS04T0452700 | (x) | TSS5910 | 1.387E-18 |
| chr4 | TCONS_00064812 | XLOC_055729 | 23287640 | 23288049 | - | 1 | RDR2         | CUFF.1034 OS04T0465700 | (x) | TSS5920 | 2.956E-47 |
| chr4 | TCONS_00062239 | XLOC_055748 | 23391710 | 23391935 | - | 1 | NA           | CUFF.8049 NA           | u   | TSS5922 | 4.08E-25  |
| chr4 | TCONS_00062251 | XLOC_055755 | 23493378 | 23493580 | - | 1 | OS04G0470100 | CUFF.8058 OS04T0470100 | (i) | TSS5923 | 9.059E-79 |
| chr4 | TCONS_00064813 | XLOC_055755 | 23493452 | 23493763 | - | 1 | OS04G0470100 | CUFF.1035 OS04T0470100 | (i) | TSS5923 | 3.69E-29  |
| chr4 | TCONS_00064814 | XLOC_055777 | 23620289 | 23620973 | - | 1 | NA           | CUFF.1035 NA           | u   | TSS5926 | 3.898E-53 |
| chr4 | TCONS_00064815 | XLOC_055780 | 23634728 | 23634933 | - | 1 | NA           | CUFF.1035 NA           | u   | TSS5926 | 5.418E-30 |
| chr4 | TCONS_00064817 | XLOC_055810 | 23864494 | 23864868 | - | 1 | NA           | CUFF.1038 NA           | u   | TSS5929 | 7.393E-44 |
| chr4 | TCONS_00064823 | XLOC_055903 | 24456858 | 24457313 | - | 1 | NA           | CUFF.1041 NA           | u   | TSS5939 | 6.174E-32 |
| chr4 | TCONS_00064827 | XLOC_055907 | 24464011 | 24464597 | - | 1 | OS04G0489600 | CUFF.1043 OS04T0489600 | (i) | TSS5940 | 0.000257  |
| chr4 | TCONS_00064829 | XLOC_055909 | 24465564 | 24465768 | - | 1 | OS04G0489600 | CUFF.1043 OS04T0489600 | (i) | TSS5940 | 5.592E-20 |
| chr4 | TCONS_00064830 | XLOC_055915 | 24484118 | 24484389 | - | 1 | OS04G0490100 | CUFF.1042 OS04T0490100 | (i) | TSS5941 | 1.549E-20 |
| chr4 | TCONS_00062428 | XLOC_055921 | 24511663 | 24511873 | - | 1 | NA           | CUFF.8134 NA           | u   | TSS5941 | 3.647E-75 |
| chr4 | TCONS_00064833 | XLOC_055934 | 24582088 | 24582324 | - | 1 | NA           | CUFF.1042 NA           | u   | TSS5943 | 2.248E-36 |
| chr4 | TCONS_00064834 | XLOC_055935 | 24583967 | 24584298 | - | 1 | NA           | CUFF.1042 NA           | u   | TSS5943 | 1.283E-05 |

|      |                |             |          |          |   |   |              |           |              |   |         |           |
|------|----------------|-------------|----------|----------|---|---|--------------|-----------|--------------|---|---------|-----------|
| chr4 | TCONS_00062450 | XLOC_055943 | 24622645 | 24622876 | - | 1 | NA           | CUFF.8150 | NA           | u | TSS5943 | 4.065E-35 |
| chr4 | TCONS_00064837 | XLOC_055944 | 24623668 | 24624180 | - | 1 | NA           | CUFF.1043 | NA           | u | TSS5944 | 4.16E-27  |
| chr4 | TCONS_00062508 | XLOC_055998 | 24995793 | 24996007 | - | 1 | OS04G0500700 | CUFF.8170 | OS04T05007(i |   | TSS5949 | 1.918E-45 |
| chr4 | TCONS_00064841 | XLOC_056013 | 25115189 | 25115463 | - | 1 | NA           | CUFF.1047 | NA           | u | TSS5951 | 1.256E-46 |
| chr4 | TCONS_00064844 | XLOC_056054 | 25385654 | 25385891 | - | 1 | OS04G0508100 | CUFF.1049 | OS04T05081(i |   | TSS5956 | 1.066E-57 |
| chr4 | TCONS_00064845 | XLOC_056055 | 25386239 | 25387179 | - | 1 | NCRNA_1793   | CUFF.1050 | NCRNA_179(x  |   | TSS5956 | 0.32672   |
| chr4 | TCONS_00062649 | XLOC_056120 | 25756197 | 25756430 | - | 1 | OS04G0515400 | CUFF.8220 | OS04T05154(x |   | TSS5963 | 1.441E-28 |
| chr4 | TCONS_00064852 | XLOC_056164 | 26094943 | 26095334 | - | 1 | NA           | CUFF.1053 | NA           | u | TSS5967 | 4.215E-54 |
| chr4 | TCONS_00062698 | XLOC_056170 | 26156607 | 26156851 | - | 1 | NA           | CUFF.8229 | NA           | u | TSS5968 | 3.716E-17 |
| chr4 | TCONS_00062699 | XLOC_056171 | 26161634 | 26161899 | - | 1 | OS04G0522800 | CUFF.8235 | OS04T05228(i |   | TSS5968 | 0         |
| chr4 | TCONS_00064854 | XLOC_056211 | 26483866 | 26484149 | - | 1 | OS04G0529500 | CUFF.1054 | OS04T05295(x |   | TSS5972 | 2.514E-28 |
| chr4 | TCONS_00064858 | XLOC_056244 | 26701010 | 26701303 | - | 1 | NA           | CUFF.1056 | NA           | u | TSS5976 | 0.024257  |
| chr4 | TCONS_00062806 | XLOC_056274 | 27003050 | 27003284 | - | 1 | NA           | CUFF.8273 | NA           | u | TSS5979 | 8.942E-30 |
| chr4 | TCONS_00064860 | XLOC_056275 | 27003372 | 27003599 | - | 1 | NA           | CUFF.1056 | NA           | u | TSS5979 | 1.501E-13 |
| chr4 | TCONS_00064863 | XLOC_056291 | 27114491 | 27114892 | - | 1 | OS04G0541500 | CUFF.1058 | OS04T05415(i |   | TSS5980 | 2.26E-21  |
| chr4 | TCONS_00064864 | XLOC_056299 | 27204864 | 27205295 | - | 1 | NA           | CUFF.1058 | NA           | u | TSS5981 | 9.077E-33 |
| chr4 | TCONS_00062829 | XLOC_056302 | 27211494 | 27211925 | - | 1 | NA           | CUFF.8275 | NA           | u | TSS5982 | 0.53626   |
| chr4 | TCONS_00062833 | XLOC_056308 | 27239123 | 27239463 | - | 1 | NCRNA_39645  | CUFF.1060 | NCRNA_396(x  |   | TSS5982 | 3.363E-07 |
| chr4 | TCONS_00062835 | XLOC_056309 | 27240219 | 27240527 | - | 1 | NA           | CUFF.8279 | NA           | u | TSS5983 | 1.143E-12 |
| chr4 | TCONS_00064869 | XLOC_056309 | 27239667 | 27240426 | - | 1 | NCRNA_1170   | CUFF.1060 | NCRNA_117(x  |   | TSS5983 | 2.122E-13 |
| chr4 | TCONS_00064870 | XLOC_056333 | 27358962 | 27359363 | - | 1 | OS04G0546400 | CUFF.1061 | OS04T05464(i |   | TSS5985 | 1.283E-05 |
| chr4 | TCONS_00064876 | XLOC_056350 | 27455213 | 27455446 | - | 1 | NA           | CUFF.1061 | NA           | u | TSS5987 | 1.859E-10 |
| chr4 | TCONS_00064880 | XLOC_056364 | 27564568 | 27564770 | - | 1 | OS04G0550500 | CUFF.1062 | OS04T05505(i |   | TSS5988 | 1.339E-23 |
| chr4 | TCONS_00062893 | XLOC_056375 | 27625161 | 27625436 | - | 1 | NA           | CUFF.8296 | NA           | u | TSS5989 | 5.262E-22 |
| chr4 | TCONS_00062917 | XLOC_056397 | 27795005 | 27795239 | - | 1 | OS04G0555400 | CUFF.8307 | OS04T05554(i |   | TSS5992 | 1.07E-22  |
| chr4 | TCONS_00064882 | XLOC_056405 | 27831528 | 27831730 | - | 1 | OS04G0556000 | CUFF.1063 | OS04T05560(i |   | TSS5993 | 1.387E-18 |
| chr4 | TCONS_00062940 | XLOC_056421 | 27991733 | 27991938 | - | 1 | OS04G0558500 | CUFF.8313 | OS04T05585(i |   | TSS5994 | 0         |
| chr4 | TCONS_00064887 | XLOC_056462 | 28278948 | 28279157 | - | 1 | NA           | CUFF.1065 | NA           | u | TSS5999 | 4.2E-31   |
| chr4 | TCONS_00064889 | XLOC_056465 | 28294505 | 28294711 | - | 1 | OS04G0564600 | CUFF.1066 | OS04T05646(i |   | TSS5999 | 5.592E-20 |
| chr4 | TCONS_00063046 | XLOC_056521 | 28821463 | 28821729 | - | 1 | DREB1E       | CUFF.8353 | OS04T05724(x |   | TSS6005 | 0         |
| chr4 | TCONS_00064893 | XLOC_056524 | 28840080 | 28840509 | - | 1 | NA           | CUFF.1069 | NA           | u | TSS6005 | 1.61E-45  |
| chr4 | TCONS_00063050 | XLOC_056527 | 28875164 | 28875364 | - | 1 | CCS          | CUFF.8370 | OS04T05732(x |   | TSS6006 | 0.0049983 |
| chr4 | TCONS_00063051 | XLOC_056528 | 28876662 | 28876880 | - | 1 | CCS          | CUFF.8376 | OS04T05732(x |   | TSS6006 | 3.734E-31 |
| chr4 | TCONS_00063052 | XLOC_056529 | 28903796 | 28904065 | - | 1 | NA           | CUFF.8355 | NA           | u | TSS6006 | 0         |
| chr4 | TCONS_00063119 | XLOC_056597 | 29407851 | 29408116 | - | 1 | OS04G0581700 | CUFF.8375 | OS04T05817(x |   | TSS6013 | 1.003E-14 |

|      |                |             |          |          |   |   |              |           |              |         |           |           |
|------|----------------|-------------|----------|----------|---|---|--------------|-----------|--------------|---------|-----------|-----------|
| chr4 | TCONS_00063173 | XLOC_056646 | 29748661 | 29748885 | - | 1 | OS04G0588500 | CUFF.8402 | OS04T05885(i | TSS6018 | 0         |           |
| chr4 | TCONS_00064904 | XLOC_056646 | 29748736 | 29748938 | - | 1 | OS04G0588500 | CUFF.1075 | OS04T05885(i | TSS6018 | 2.881E-79 |           |
| chr4 | TCONS_00064905 | XLOC_056647 | 29749464 | 29750190 | - | 1 | OS04G0588500 | CUFF.1075 | OS04T05885(i | TSS6019 | 8.477E-11 |           |
| chr4 | TCONS_00063179 | XLOC_056654 | 29803480 | 29803682 | - | 1 | OS04G0589600 | CUFF.8394 | OS04T05896(x | TSS6019 | 0         |           |
| chr4 | TCONS_00064910 | XLOC_056700 | 30213593 | 30213949 | - | 1 | OS04G0598800 | CUFF.1075 | OS04T05988(x | TSS6024 | 8.155E-21 |           |
| chr4 | TCONS_00064912 | XLOC_056731 | 30456570 | 30456903 | - | 1 | NCRNA_49138  | CUFF.1076 | NCRNA_491(x  | TSS6028 | 1.363E-09 |           |
| chr4 | TCONS_00064913 | XLOC_056732 | 30457682 | 30458095 | - | 1 | NA           | CUFF.1076 | NA           | u       | TSS6028   | 5.183E-48 |
| chr4 | TCONS_00063270 | XLOC_056734 | 30459771 | 30460011 | - | 1 | NA           | CUFF.8422 | NA           | u       | TSS6028   | 1.238E-25 |
| chr4 | TCONS_00064915 | XLOC_056735 | 30460696 | 30461039 | - | 1 | NA           | CUFF.1076 | NA           | u       | TSS6028   | 0.0014245 |
| chr4 | TCONS_00063337 | XLOC_056794 | 30930595 | 30930804 | - | 1 | OS04G0610200 | CUFF.8453 | OS04T06102(x | TSS6035 | 0         |           |
| chr4 | TCONS_00063338 | XLOC_056795 | 30940279 | 30940497 | - | 1 | NA           | CUFF.8459 | NA           | u       | TSS6035   | 4.187E-73 |
| chr4 | TCONS_00063339 | XLOC_056796 | 30940718 | 30940940 | - | 1 | NA           | CUFF.8455 | NA           | u       | TSS6035   | 2.339E-70 |
| chr4 | TCONS_00063340 | XLOC_056797 | 30941278 | 30941655 | - | 1 | NA           | CUFF.8454 | NA           | u       | TSS6035   | 1.029E-10 |
| chr4 | TCONS_00064922 | XLOC_056821 | 31081096 | 31081428 | - | 1 | NA           | CUFF.1080 | NA           | u       | TSS6038   | 0.002878  |
| chr4 | TCONS_00064923 | XLOC_056826 | 31103531 | 31103875 | - | 1 | OS04G0613500 | CUFF.1081 | OS04T06135(i | TSS6038 | 1.512E-25 |           |
| chr4 | TCONS_00064924 | XLOC_056827 | 31104350 | 31104553 | - | 1 | OS04G0613500 | CUFF.1081 | OS04T06135(i | TSS6038 | 0         |           |
| chr4 | TCONS_00063380 | XLOC_056834 | 31142248 | 31142461 | - | 1 | NA           | CUFF.8464 | NA           | u       | TSS6039   | 0         |
| chr4 | TCONS_00063381 | XLOC_056835 | 31145921 | 31146140 | - | 1 | NA           | CUFF.8465 | NA           | u       | TSS6039   | 0         |
| chr4 | TCONS_00063387 | XLOC_056841 | 31205369 | 31205777 | - | 1 | NA           | CUFF.8468 | NA           | u       | TSS6040   | 1.463E-23 |
| chr4 | TCONS_00063388 | XLOC_056842 | 31215805 | 31216015 | - | 1 | OS04G0615100 | CUFF.8486 | OS04T06151(i | TSS6040 | 8.469E-41 |           |
| chr4 | TCONS_00063424 | XLOC_056873 | 31361442 | 31361687 | - | 1 | OS04G0617500 | CUFF.8481 | OS04T06175(x | TSS6044 | 1.159E-09 |           |
| chr4 | TCONS_00063433 | XLOC_056882 | 31403721 | 31404182 | - | 1 | UEL-2        | CUFF.8491 | OS04T06182(i | TSS6045 | 1.496E-43 |           |
| chr4 | TCONS_00064932 | XLOC_056903 | 31553686 | 31554350 | - | 1 | NA           | CUFF.1085 | NA           | u       | TSS6047   | 6.274E-32 |
| chr4 | TCONS_00063463 | XLOC_056917 | 31593683 | 31593895 | - | 1 | NA           | CUFF.8509 | NA           | u       | TSS6048   | 1.33E-29  |
| chr4 | TCONS_00063465 | XLOC_056920 | 31602769 | 31603349 | - | 1 | NA           | CUFF.8513 | NA           | u       | TSS6049   | 0         |
| chr4 | TCONS_00064943 | XLOC_056921 | 31603862 | 31605373 | - | 1 | NA           | CUFF.1088 | NA           | u       | TSS6049   | 0.45866   |
| chr4 | TCONS_00063478 | XLOC_056931 | 31642510 | 31642710 | - | 1 | NA           | CUFF.8521 | NA           | u       | TSS6050   | 0         |
| chr4 | TCONS_00064946 | XLOC_056936 | 31657683 | 31658062 | - | 1 | NA           | CUFF.1088 | NA           | u       | TSS6051   | 1.739E-22 |
| chr4 | TCONS_00064947 | XLOC_056937 | 31659179 | 31659501 | - | 1 | NA           | CUFF.1088 | NA           | u       | TSS6051   | 4.203E-26 |
| chr4 | TCONS_00063482 | XLOC_056938 | 31660345 | 31660554 | - | 1 | NA           | CUFF.8527 | NA           | u       | TSS6051   | 0         |
| chr4 | TCONS_00063483 | XLOC_056939 | 31660656 | 31660860 | - | 1 | OS04G0623066 | CUFF.8531 | OS04T06230(x | TSS6051 | 0         |           |
| chr4 | TCONS_00064949 | XLOC_056950 | 31698326 | 31698531 | - | 1 | SRP14        | CUFF.1089 | OS04T06237(i | TSS6052 | 5.443E-25 |           |
| chr4 | TCONS_00063533 | XLOC_056987 | 31970885 | 31971117 | - | 1 | OS04G0628200 | CUFF.8539 | OS04T06282(i | TSS6056 | 1.441E-28 |           |
| chr4 | TCONS_00063539 | XLOC_056991 | 32002228 | 32002444 | - | 1 | OS04G0629000 | CUFF.8544 | OS04T06290(x | TSS6056 | 4.064E-51 |           |
| chr4 | TCONS_00063553 | XLOC_057006 | 32141268 | 32141494 | - | 1 | NA           | CUFF.8546 | NA           | u       | TSS6058   | 1.463E-23 |

|      |                |             |          |          |   |   |              |                        |         |           |           |
|------|----------------|-------------|----------|----------|---|---|--------------|------------------------|---------|-----------|-----------|
| chr4 | TCONS_00064961 | XLOC_057028 | 32289634 | 32289989 | - | 1 | OS04G0634700 | CUFF.1747 OS04T06347(x | TSS6060 | 7.546E-25 |           |
| chr4 | TCONS_00064962 | XLOC_057029 | 32295481 | 32295785 | - | 1 | OS04G0634800 | CUFF.1747 OS04T06348(x | TSS6061 | 2.216E-26 |           |
| chr4 | TCONS_00064963 | XLOC_057052 | 32406977 | 32407285 | - | 1 | OS04G0637000 | CUFF.1093 OS04T06370(i | TSS6063 | 5.443E-25 |           |
| chr4 | TCONS_00063627 | XLOC_057077 | 32606050 | 32606425 | - | 1 | OS04G0640900 | CUFF.1093 OS04T06409(x | TSS6066 | 0.19339   |           |
| chr4 | TCONS_00063655 | XLOC_057101 | 32756476 | 32756779 | - | 1 | OS04G0643550 | CUFF.8587 OS04T06435(i | TSS6068 | 0         |           |
| chr4 | TCONS_00064976 | XLOC_057130 | 32884084 | 32884336 | - | 1 | NA           | CUFF.1095 NA           | u       | TSS6071   | 9.077E-33 |
| chr4 | TCONS_00063679 | XLOC_057131 | 32887515 | 32887786 | - | 1 | NA           | CUFF.8595 NA           | u       | TSS6072   | 0.018387  |
| chr4 | TCONS_00064977 | XLOC_057131 | 32886861 | 32887538 | - | 1 | NA           | CUFF.1096 NA           | u       | TSS6071   | 4.341E-45 |
| chr4 | TCONS_00064978 | XLOC_057132 | 32888003 | 32888230 | - | 1 | NA           | CUFF.1096 NA           | u       | TSS6072   | 0.075834  |
| chr4 | TCONS_00064979 | XLOC_057133 | 32888514 | 32888737 | - | 1 | NA           | CUFF.1096 NA           | u       | TSS6072   | 2.303E-41 |
| chr4 | TCONS_00064980 | XLOC_057134 | 32891691 | 32891911 | - | 1 | NA           | CUFF.1096 NA           | u       | TSS6072   | 3.405E-06 |
| chr4 | TCONS_00064981 | XLOC_057135 | 32892026 | 32892476 | - | 1 | NA           | CUFF.1096 NA           | u       | TSS6072   | 1.162E-05 |
| chr4 | TCONS_00063747 | XLOC_057196 | 33308213 | 33308705 | - | 1 | OS04G0653000 | CUFF.8608 OS04T06530(i | TSS6079 | 2.082E-66 |           |
| chr4 | TCONS_00064985 | XLOC_057212 | 33430011 | 33430394 | - | 1 | OS04G0655600 | CUFF.1100 OS04T06556(i | TSS6080 | 2.02E-19  |           |
| chr4 | TCONS_00064986 | XLOC_057214 | 33460204 | 33460437 | - | 1 | OS04G0656100 | CUFF.1113 OS04T06561(i | TSS6080 | 5.365E-66 |           |
| chr4 | TCONS_00063775 | XLOC_057226 | 33559576 | 33559799 | - | 1 | OS04G0658000 | CUFF.8622 OS04T06580(i | TSS6082 | 1.05E-32  |           |
| chr4 | TCONS_00064987 | XLOC_057238 | 33647433 | 33647794 | - | 1 | OS04G0659400 | CUFF.1101 OS04T06594(i | TSS6083 | 1.179E-54 |           |
| chr4 | TCONS_00064991 | XLOC_057257 | 33763031 | 33763245 | - | 1 | OS04G0661600 | CUFF.1105 OS04T06616(i | TSS6085 | 1.069E-14 |           |
| chr4 | TCONS_00064995 | XLOC_057292 | 33983799 | 33984073 | - | 1 | OS04G0665700 | CUFF.1104 OS04T06657(i | TSS6089 | 1.17E-31  |           |
| chr4 | TCONS_00063864 | XLOC_057306 | 34082171 | 34082414 | - | 1 | NA           | CUFF.8640 NA           | u       | TSS6091   | 9.093E-16 |
| chr4 | TCONS_00065002 | XLOC_057359 | 34395606 | 34395897 | - | 1 | OS04G0673700 | CUFF.1107 OS04T06737(x | TSS6097 | 1.136E-14 |           |
| chr4 | TCONS_00063930 | XLOC_057364 | 34407854 | 34408187 | - | 1 | NA           | CUFF.8660 NA           | u       | TSS6097   | 1.709E-24 |
| chr4 | TCONS_00065004 | XLOC_057382 | 34477900 | 34478795 | - | 1 | NA           | CUFF.1107 NA           | u       | TSS6099   | 0.96108   |
| chr4 | TCONS_00063975 | XLOC_057406 | 34585192 | 34585419 | - | 1 | PRMT6.1      | CUFF.8674 OS04T06770(x | TSS6102 | 3.559E-42 |           |
| chr4 | TCONS_00065007 | XLOC_057420 | 34674661 | 34674883 | - | 1 | OS04G0679050 | CUFF.1108 OS04T06790(i | TSS6103 | 1.091E-44 |           |
| chr4 | TCONS_00065008 | XLOC_057421 | 34678102 | 34678443 | - | 1 | OS04G0679100 | CUFF.1109 OS04T06791(i | TSS6104 | 9.158E-23 |           |
| chr4 | TCONS_00064001 | XLOC_057432 | 34760484 | 34760710 | - | 1 | NA           | CUFF.8677 NA           | u       | TSS6105   | 2.943E-29 |
| chr4 | TCONS_00064029 | XLOC_057456 | 34946682 | 34947026 | - | 1 | OS04G0684200 | CUFF.8692 OS04T06842(x | TSS6108 | 1.772E-74 |           |
| chr4 | TCONS_00064114 | XLOC_057547 | 23050564 | 23050774 | . | 1 | OS04G0461400 | CUFF.8034 OS04T04614(i | TSS6117 | 9.352E-45 |           |
| chr4 | TCONS_00064116 | XLOC_057549 | 23518022 | 23518248 | . | 1 | OS04G0470700 | CUFF.8061 OS04T04707(i | TSS6117 | 7.057E-33 |           |
| chr4 | TCONS_00065031 | XLOC_057551 | 24517680 | 24517884 | . | 1 | OS04G0490600 | CUFF.1043 OS04T04906(i | TSS6118 | 1.19E-21  |           |
| chr5 | TCONS_00065159 | XLOC_057677 | 783047   | 783267   | + | 1 | OS05G0114400 | CUFF.8755 OS05T01144(x | TSS6131 | 0.075834  |           |
| chr5 | TCONS_00072351 | XLOC_057678 | 788650   | 788933   | + | 1 | OS05G0114500 | CUFF.1119 OS05T01145(x | TSS6131 | 2.542E-23 |           |
| chr5 | TCONS_00065174 | XLOC_057692 | 855011   | 855222   | + | 1 | OS05G0115700 | CUFF.8760 OS05T01157(i | TSS6132 | 3.529E-87 |           |
| chr5 | TCONS_00065205 | XLOC_057722 | 993708   | 994203   | + | 1 | OS05G0119100 | CUFF.8770 OS05T01191(x | TSS6136 | 2.507E-09 |           |



|      |                |             |          |          |   |   |              |           |              |         |           |           |
|------|----------------|-------------|----------|----------|---|---|--------------|-----------|--------------|---------|-----------|-----------|
| chr5 | TCONS_00065206 | XLOC_057723 | 998433   | 998658   | + | 1 | OS05G0119200 | CUFF.8771 | OS05T01192(i | TSS6136 | 4.08E-25  |           |
| chr5 | TCONS_00072361 | XLOC_057742 | 1156598  | 1158069  | + | 1 | OS05G0121600 | CUFF.1122 | OS05T01216(x | TSS6138 | 0.61171   |           |
| chr5 | TCONS_00065227 | XLOC_057743 | 1159662  | 1160041  | + | 1 | OS05G0121600 | CUFF.8785 | OS05T01216(x | TSS6138 | 1.427E-25 |           |
| chr5 | TCONS_00065265 | XLOC_057775 | 1493403  | 1493620  | + | 1 | NA           | CUFF.8788 | NA           | u       | TSS6142   | 0.0077427 |
| chr5 | TCONS_00072367 | XLOC_057779 | 1508545  | 1508746  | + | 1 | NA           | CUFF.1123 | NA           | u       | TSS6142   | 7.048E-34 |
| chr5 | TCONS_00072369 | XLOC_057815 | 1729075  | 1729504  | + | 1 | OS05G0129700 | CUFF.1125 | OS05T01297(i | TSS6147 | 8.155E-21 |           |
| chr5 | TCONS_00072393 | XLOC_058006 | 3194552  | 3195027  | + | 1 | OS05G0154600 | CUFF.1134 | OS05T01546(i | TSS6167 | 3.129E-15 |           |
| chr5 | TCONS_00065524 | XLOC_058021 | 3251676  | 3251949  | + | 1 | OS05G0155500 | CUFF.1135 | OS05T01555(x | TSS6169 | 0.14652   |           |
| chr5 | TCONS_00072399 | XLOC_058037 | 3352203  | 3352409  | + | 1 | OS05G0157300 | CUFF.1136 | OS05T01573(x | TSS6170 | 1.25E-16  |           |
| chr5 | TCONS_00065589 | XLOC_058095 | 3708469  | 3709065  | + | 1 | NA           | CUFF.8902 | NA           | u       | TSS6176   | 7.614E-28 |
| chr5 | TCONS_00072411 | XLOC_058095 | 3708598  | 3710731  | + | 1 | NA           | CUFF.1138 | NA           | u       | TSS6177   | 0.0001683 |
| chr5 | TCONS_00072412 | XLOC_058096 | 3713980  | 3714236  | + | 1 | OS05G0163250 | CUFF.1139 | OS05T01632(i | TSS6177 | 5.961E-15 |           |
| chr5 | TCONS_00072413 | XLOC_058098 | 3734450  | 3734900  | + | 1 | OS05G0163700 | CUFF.1140 | OS05T01637(i | TSS6177 | 4.824E-23 |           |
| chr5 | TCONS_00065626 | XLOC_058132 | 4093110  | 4093363  | + | 1 | NCRNA_47089  | CUFF.8913 | NCRNA_470(x  | TSS6180 | 2.014E-09 |           |
| chr5 | TCONS_00065675 | XLOC_058172 | 4455104  | 4455313  | + | 1 | NA           | CUFF.8925 | NA           | u       | TSS6185   | 0         |
| chr5 | TCONS_00072417 | XLOC_058193 | 4682593  | 4683245  | + | 1 | IAA15        | CUFF.1142 | OS05T01786(i | TSS6187 | 1.326E-28 |           |
| chr5 | TCONS_00072418 | XLOC_058194 | 4683361  | 4683620  | + | 1 | IAA15        | CUFF.1143 | OS05T01786(i | TSS6187 | 2.943E-20 |           |
| chr5 | TCONS_00065709 | XLOC_058206 | 4802165  | 4802453  | + | 1 | NA           | CUFF.8933 | NA           | u       | TSS6188   | 5.848E-09 |
| chr5 | TCONS_00065722 | XLOC_058220 | 4915219  | 4915451  | + | 1 | NA           | CUFF.8941 | NA           | u       | TSS6190   | 3.533E-22 |
| chr5 | TCONS_00072422 | XLOC_058222 | 4916145  | 4916524  | + | 1 | NA           | CUFF.1143 | NA           | u       | TSS6190   | 2.303E-41 |
| chr5 | TCONS_00072423 | XLOC_058223 | 4916620  | 4916857  | + | 1 | NA           | CUFF.1144 | NA           | u       | TSS6190   | 6.883E-81 |
| chr5 | TCONS_00065735 | XLOC_058236 | 4999103  | 4999340  | + | 1 | OS05G0183100 | CUFF.8954 | OS05T01831(x | TSS6192 | 2.175E-38 |           |
| chr5 | TCONS_00072428 | XLOC_058263 | 5340241  | 5340490  | + | 1 | HXK7         | CUFF.1147 | OS05T01871(i | TSS6195 | 3.69E-29  |           |
| chr5 | TCONS_00065772 | XLOC_058269 | 5394083  | 5394406  | + | 1 | NA           | CUFF.8959 | NA           | u       | TSS6195   | 5.262E-22 |
| chr5 | TCONS_00072429 | XLOC_058270 | 5397464  | 5397692  | + | 1 | DER1         | CUFF.1146 | OS05T01878(i | TSS6195 | 5.418E-30 |           |
| chr5 | TCONS_00072431 | XLOC_058380 | 6474463  | 6474916  | + | 1 | OS05G0203900 | CUFF.1149 | OS05T02039(i | TSS6207 | 2.654E-11 |           |
| chr5 | TCONS_00065920 | XLOC_058407 | 6725825  | 6726074  | + | 1 | OS05G0208550 | CUFF.8997 | OS05T02085(i | TSS6210 | 3.452E-10 |           |
| chr5 | TCONS_00072445 | XLOC_058511 | 7644970  | 7645175  | + | 1 | NA           | CUFF.1152 | NA           | u       | TSS6220   | 2.638E-18 |
| chr5 | TCONS_00066041 | XLOC_058530 | 7779570  | 7779974  | + | 1 | OS05G0228000 | CUFF.9018 | OS05T02280(i | TSS6222 | 0.0021045 |           |
| chr5 | TCONS_00066056 | XLOC_058545 | 7971283  | 7971787  | + | 1 | NA           | CUFF.9021 | NA           | u       | TSS6224   | 0         |
| chr5 | TCONS_00072453 | XLOC_058578 | 8528229  | 8528504  | + | 1 | OS05G0240200 | CUFF.1157 | OS05T02402(i | TSS6227 | 2.216E-31 |           |
| chr5 | TCONS_00066089 | XLOC_058580 | 8533327  | 8533554  | + | 1 | OS05G0240200 | CUFF.9043 | OS05T02402(i | TSS6227 | 2.524E-26 |           |
| chr5 | TCONS_00072456 | XLOC_058589 | 8584379  | 8584595  | + | 1 | OS05G0241000 | CUFF.1156 | OS05T02410(x | TSS6228 | 2.248E-36 |           |
| chr5 | TCONS_00072461 | XLOC_058601 | 8759996  | 8760202  | + | 1 | NA           | CUFF.1156 | NA           | u       | TSS6230   | 2.216E-26 |
| chr5 | TCONS_00066213 | XLOC_058706 | 10119137 | 10120068 | + | 1 | OS05G0261700 | CUFF.9113 | OS05T02617(i | TSS6240 | 1.263E-49 |           |

|      |                |             |          |          |   |   |              |           |              |         |           |           |
|------|----------------|-------------|----------|----------|---|---|--------------|-----------|--------------|---------|-----------|-----------|
| chr5 | TCONS_00072466 | XLOC_058706 | 10118980 | 10119488 | + | 1 | OS05G0261700 | CUFF.1163 | OS05T02617(i | TSS6240 | 0.0036549 |           |
| chr5 | TCONS_00066214 | XLOC_058707 | 10120479 | 10121495 | + | 1 | OS05G0261700 | CUFF.9114 | OS05T02617(i | TSS6241 | 5.149E-64 |           |
| chr5 | TCONS_00066216 | XLOC_058707 | 10122570 | 10123243 | + | 1 | OS05G0261700 | CUFF.9116 | OS05T02617(i | TSS6241 | 4.201E-23 |           |
| chr5 | TCONS_00072468 | XLOC_058707 | 10121131 | 10122674 | + | 1 | OS05G0261700 | CUFF.1164 | OS05T02617(i | TSS6241 | 3.078E-25 |           |
| chr5 | TCONS_00066286 | XLOC_058777 | 11260645 | 11260935 | + | 1 | NA           | CUFF.9083 | NA           | u       | TSS6248   | 1.029E-10 |
| chr5 | TCONS_00066369 | XLOC_058857 | 12677504 | 12677860 | + | 1 | OS05G0290400 | CUFF.9110 | OS05T02904(i | TSS6256 | 9.037E-25 |           |
| chr5 | TCONS_00072477 | XLOC_058891 | 13065239 | 13066959 | + | 1 | ACC2         | CUFF.1168 | OS05T02953(x | TSS6260 | 0.083524  |           |
| chr5 | TCONS_00066408 | XLOC_058893 | 13067385 | 13067573 | + | 1 | NA           | CUFF.9135 | NA           | u       | TSS6260   | 7.381E-39 |
| chr5 | TCONS_00072478 | XLOC_058893 | 13067362 | 13067573 | + | 1 | NA           | CUFF.1168 | NA           | u       | TSS6260   | 1.044E-29 |
| chr5 | TCONS_00072480 | XLOC_058894 | 13068917 | 13069128 | + | 1 | NA           | CUFF.1165 | NA           | u       | TSS6261   | 1.136E-14 |
| chr5 | TCONS_00072481 | XLOC_058895 | 13070870 | 13071314 | + | 1 | NA           | CUFF.1165 | NA           | u       | TSS6261   | 3.405E-06 |
| chr5 | TCONS_00072482 | XLOC_058896 | 13071435 | 13071708 | + | 1 | NA           | CUFF.1166 | NA           | u       | TSS6261   | 3.69E-29  |
| chr5 | TCONS_00066446 | XLOC_058932 | 13375636 | 13375855 | + | 1 | NA           | CUFF.9143 | NA           | u       | TSS6265   | 1.657E-47 |
| chr5 | TCONS_00066500 | XLOC_058985 | 13846639 | 13847066 | + | 1 | OS05G0306000 | CUFF.9163 | OS05T03060(i | TSS6270 | 7.236E-51 |           |
| chr5 | TCONS_00066536 | XLOC_059017 | 14262454 | 14262688 | + | 1 | OS05G0311801 | CUFF.9169 | OS05T03118(x | TSS6274 | 2.144E-28 |           |
| chr5 | TCONS_00066539 | XLOC_059020 | 14294247 | 14294780 | + | 1 | NCRNA_49957  | CUFF.9180 | NCRNA_499:x  | TSS6274 | 1.198E-57 |           |
| chr5 | TCONS_00072491 | XLOC_059022 | 14302439 | 14302675 | + | 1 | OS05G0312000 | CUFF.1171 | OS05T03120(i | TSS6274 | 5.765E-45 |           |
| chr5 | TCONS_00072492 | XLOC_059024 | 14307266 | 14307896 | + | 1 | OS05G0312000 | CUFF.1171 | OS05T03120(i | TSS6274 | 1.739E-22 |           |
| chr5 | TCONS_00072494 | XLOC_059042 | 14498848 | 14499124 | + | 1 | NA           | CUFF.1171 | NA           | u       | TSS6277   | 9.158E-23 |
| chr5 | TCONS_00072496 | XLOC_059051 | 14588032 | 14588445 | + | 1 | OS05G0316000 | CUFF.1171 | OS05T03160(x | TSS6277 | 1.173E-53 |           |
| chr5 | TCONS_00072499 | XLOC_059055 | 14599967 | 14600245 | + | 1 | OS05G0316100 | CUFF.1172 | OS05T03161(x | TSS6278 | 5.418E-30 |           |
| chr5 | TCONS_00072503 | XLOC_059087 | 14902928 | 14903504 | + | 1 | OS05G0320700 | CUFF.1174 | OS05T03207(i | TSS6281 | 7.736E-44 |           |
| chr5 | TCONS_00066713 | XLOC_059194 | 16020464 | 16020668 | + | 1 | OS05G0341600 | CUFF.9211 | OS05T03416(x | TSS6292 | 0         |           |
| chr5 | TCONS_00072508 | XLOC_059230 | 16485417 | 16485785 | + | 1 | NA           | CUFF.1175 | NA           | u       | TSS6296   | 6.821E-10 |
| chr5 | TCONS_00072514 | XLOC_059272 | 16852225 | 16852459 | + | 1 | OS05G0355300 | CUFF.1178 | OS05T03553(i | TSS6300 | 9.541E-18 |           |
| chr5 | TCONS_00072516 | XLOC_059297 | 17020349 | 17020623 | + | 1 | OS05G0358500 | CUFF.1179 | OS05T03585(i | TSS6303 | 2.891E-35 |           |
| chr5 | TCONS_00066813 | XLOC_059300 | 17061177 | 17061395 | + | 1 | OS05G0358700 | CUFF.9247 | OS05T03587(i | TSS6303 | 4.745E-28 |           |
| chr5 | TCONS_00066853 | XLOC_059334 | 17345218 | 17345882 | + | 1 | OS05G0363200 | CUFF.9267 | OS05T03632(x | TSS6307 | 1.136E-27 |           |
| chr5 | TCONS_00072519 | XLOC_059335 | 17346255 | 17346629 | + | 1 | OS05G0363200 | CUFF.1181 | OS05T03632(i | TSS6307 | 4.872E-05 |           |
| chr5 | TCONS_00072521 | XLOC_059343 | 17444781 | 17445120 | + | 1 | OS05G0364500 | CUFF.1180 | OS05T03645(i | TSS6308 | 1.063E-19 |           |
| chr5 | TCONS_00066889 | XLOC_059368 | 17648448 | 17648679 | + | 1 | OS05G0367400 | CUFF.9260 | OS05T03674(i | TSS6311 | 2.492E-17 |           |
| chr5 | TCONS_00066926 | XLOC_059404 | 17944459 | 17944662 | + | 1 | OS05G0372400 | CUFF.9268 | OS05T03724(x | TSS6315 | 1.714E-86 |           |
| chr5 | TCONS_00072532 | XLOC_059427 | 18164965 | 18165420 | + | 1 | OS05G0376300 | CUFF.1186 | OS05T03763(i | TSS6317 | 1.688E-45 |           |
| chr5 | TCONS_00072533 | XLOC_059443 | 18293445 | 18293698 | + | 1 | NA           | CUFF.1184 | NA           | u       | TSS6319   | 1.991E-12 |
| chr5 | TCONS_00067048 | XLOC_059522 | 18956495 | 18956718 | + | 1 | NA           | CUFF.9296 | NA           | u       | TSS6327   | 3.518E-53 |

|      |                |             |          |          |   |   |              |                        |         |           |           |
|------|----------------|-------------|----------|----------|---|---|--------------|------------------------|---------|-----------|-----------|
| chr5 | TCONS_00072536 | XLOC_059529 | 19023795 | 19024018 | + | 1 | OS05G0391600 | CUFF.1188 OS05T03916(i | TSS6328 | 0.005791  |           |
| chr5 | TCONS_00072537 | XLOC_059530 | 19025051 | 19025572 | + | 1 | OS05G0391600 | CUFF.1188 OS05T03916(i | TSS6328 | 2.542E-23 |           |
| chr5 | TCONS_00072538 | XLOC_059531 | 19026080 | 19026305 | + | 1 | OS05G0391600 | CUFF.1188 OS05T03916(i | TSS6328 | 6.604E-06 |           |
| chr5 | TCONS_00072541 | XLOC_059535 | 19056151 | 19056410 | + | 1 | OS05G0392000 | CUFF.1188 OS05T03920(x | TSS6328 | 2.943E-20 |           |
| chr5 | TCONS_00072546 | XLOC_059542 | 19059205 | 19059930 | + | 1 | NA           | CUFF.1187 NA           | u       | TSS6329   | 9.542E-11 |
| chr5 | TCONS_00072550 | XLOC_059546 | 19062773 | 19063185 | + | 1 | NA           | CUFF.1187 NA           | u       | TSS6330   | 5.961E-15 |
| chr5 | TCONS_00072553 | XLOC_059557 | 19109864 | 19110268 | + | 1 | OS05G0392700 | CUFF.1188 OS05T03927(i | TSS6331 | 1.959E-24 |           |
| chr5 | TCONS_00067071 | XLOC_059558 | 19111736 | 19111951 | + | 1 | OS05G0392700 | CUFF.9312 OS05T03927(i | TSS6331 | 7.764E-53 |           |
| chr5 | TCONS_00072556 | XLOC_059583 | 19342309 | 19342582 | + | 1 | OS05G0397650 | CUFF.1189 OS05T03976(i | TSS6334 | 3.69E-29  |           |
| chr5 | TCONS_00072558 | XLOC_059619 | 19525637 | 19526146 | + | 1 | OS05G0401500 | CUFF.1190 OS05T04015(x | TSS6337 | 0.041676  |           |
| chr5 | TCONS_00072559 | XLOC_059620 | 19526248 | 19526535 | + | 1 | NA           | CUFF.1191 NA           | u       | TSS6338   | 2.647E-43 |
| chr5 | TCONS_00072562 | XLOC_059625 | 19530120 | 19531013 | + | 1 | NA           | CUFF.1190 NA           | u       | TSS6338   | 2.676E-38 |
| chr5 | TCONS_00072563 | XLOC_059626 | 19531166 | 19531776 | + | 1 | NA           | CUFF.1191 NA           | u       | TSS6338   | 9.239E-09 |
| chr5 | TCONS_00067148 | XLOC_059635 | 19587808 | 19588050 | + | 1 | NA           | CUFF.9329 NA           | u       | TSS6339   | 3.698E-13 |
| chr5 | TCONS_00067149 | XLOC_059637 | 19589555 | 19589821 | + | 1 | OS05G0402300 | CUFF.9331 OS05T04023(i | TSS6339 | 8.413E-63 |           |
| chr5 | TCONS_00072567 | XLOC_059648 | 19673994 | 19674196 | + | 1 | NA           | CUFF.1191 NA           | u       | TSS6340   | 1.339E-23 |
| chr5 | TCONS_00072568 | XLOC_059656 | 19718049 | 19718339 | + | 1 | NA           | CUFF.1191 NA           | u       | TSS6341   | 2.981E-58 |
| chr5 | TCONS_00072572 | XLOC_059705 | 20154118 | 20154417 | + | 1 | NA           | CUFF.1194 NA           | u       | TSS6347   | 1.814E-44 |
| chr5 | TCONS_00067230 | XLOC_059713 | 20244598 | 20245178 | + | 1 | OS05G0414100 | CUFF.9351 OS05T04141(x | TSS6348 | 1.16E-25  |           |
| chr5 | TCONS_00067232 | XLOC_059715 | 20246968 | 20247217 | + | 1 | NA           | CUFF.9350 NA           | u       | TSS6348   | 0         |
| chr5 | TCONS_00067275 | XLOC_059758 | 20579887 | 20580107 | + | 1 | NA           | CUFF.9359 NA           | u       | TSS6352   | 7.708E-37 |
| chr5 | TCONS_00067341 | XLOC_059827 | 20945811 | 20946109 | + | 1 | OS05G0427200 | CUFF.9379 OS05T04272(x | TSS6359 | 1.825E-08 |           |
| chr5 | TCONS_00072584 | XLOC_059839 | 21051778 | 21051980 | + | 1 | OS05G0429000 | CUFF.1199 OS05T04290(i | TSS6361 | 2.869E-25 |           |
| chr5 | TCONS_00067354 | XLOC_059844 | 21099993 | 21100234 | + | 1 | OS05G0429900 | CUFF.9386 OS05T04299(x | TSS6361 | 2.074E-19 |           |
| chr5 | TCONS_00067397 | XLOC_059881 | 21424709 | 21424920 | + | 1 | NA           | CUFF.9396 NA           | u       | TSS6365   | 2.507E-69 |
| chr5 | TCONS_00067404 | XLOC_059889 | 21459994 | 21460218 | + | 1 | NA           | CUFF.9402 NA           | u       | TSS6366   | 1.291E-45 |
| chr5 | TCONS_00067454 | XLOC_059940 | 21943149 | 21943764 | + | 1 | NCRNA_4316   | CUFF.9412 NCRNA_431(x  | TSS6372 | 1.207E-87 |           |
| chr5 | TCONS_00072593 | XLOC_059940 | 21943034 | 21943419 | + | 1 | NA           | CUFF.1201 NA           | u       | TSS6371   | 3.348E-32 |
| chr5 | TCONS_00067504 | XLOC_059990 | 22308940 | 22309169 | + | 1 | NA           | CUFF.9427 NA           | u       | TSS6377   | 1.561E-32 |
| chr5 | TCONS_00072603 | XLOC_060004 | 22432590 | 22432931 | + | 1 | NA           | CUFF.1204 NA           | u       | TSS6379   | 8.061E-36 |
| chr5 | TCONS_00067523 | XLOC_060009 | 22441890 | 22442154 | + | 1 | OS05G0456925 | CUFF.1204 OS05T04569(x | TSS6379 | 4.293E-21 |           |
| chr5 | TCONS_00072607 | XLOC_060038 | 22627568 | 22627770 | + | 1 | RIBA3        | CUFF.1206 OS05T04606(x | TSS6382 | 1.387E-18 |           |
| chr5 | TCONS_00072609 | XLOC_060045 | 22655773 | 22655978 | + | 1 | NA           | CUFF.1205 NA           | u       | TSS6383   | 5.443E-25 |
| chr5 | TCONS_00072614 | XLOC_060067 | 22779047 | 22779623 | + | 1 | OS05G0463900 | CUFF.1208 OS05T04639(x | TSS6385 | 2.345E-12 |           |
| chr5 | TCONS_00072615 | XLOC_060068 | 22780625 | 22780987 | + | 1 | NA           | CUFF.1206 NA           | u       | TSS6385   | 2.869E-25 |

|      |                |             |          |          |   |   |              |                        |   |         |           |
|------|----------------|-------------|----------|----------|---|---|--------------|------------------------|---|---------|-----------|
| chr5 | TCONS_00072616 | XLOC_060069 | 22781333 | 22781700 | + | 1 | NA           | CUFF.1207 NA           | u | TSS6385 | 5.443E-25 |
| chr5 | TCONS_00067580 | XLOC_060070 | 22782065 | 22782632 | + | 1 | OS05G0464001 | CUFF.9453 OS05T04640(x |   | TSS6386 | 4.16E-27  |
| chr5 | TCONS_00072618 | XLOC_060070 | 22782287 | 22782949 | + | 1 | OS05G0464001 | CUFF.1208 OS05T04640(x |   | TSS6386 | 3.856E-73 |
| chr5 | TCONS_00072619 | XLOC_060072 | 22783470 | 22783851 | + | 1 | NA           | CUFF.1207 NA           | u | TSS6386 | 6.57E-17  |
| chr5 | TCONS_00072624 | XLOC_060079 | 22800282 | 22800589 | + | 1 | NA           | CUFF.1207 NA           | u | TSS6387 | 1.19E-21  |
| chr5 | TCONS_00067602 | XLOC_060098 | 22904781 | 22904993 | + | 1 | OS05G0466700 | CUFF.9458 OS05T04667(x |   | TSS6389 | 1.941E-67 |
| chr5 | TCONS_00067652 | XLOC_060151 | 23276620 | 23277067 | + | 1 | OS05G0473900 | CUFF.9476 OS05T04739(x |   | TSS6394 | 1.287E-56 |
| chr5 | TCONS_00067653 | XLOC_060152 | 23277392 | 23277621 | + | 1 | OS05G0473900 | CUFF.9477 OS05T04739(i |   | TSS6394 | 0         |
| chr5 | TCONS_00072638 | XLOC_060170 | 23358580 | 23359340 | + | 1 | OS05G0475475 | CUFF.1213 OS05T04754(i |   | TSS6396 | 6.269E-37 |
| chr5 | TCONS_00072641 | XLOC_060202 | 23483914 | 23484324 | + | 1 | NCRNA_38796  | CUFF.1212 NCRNA_387(x  |   | TSS6399 | 2.638E-18 |
| chr5 | TCONS_00067728 | XLOC_060226 | 23664485 | 23664710 | + | 1 | OS05G0481400 | CUFF.9499 OS05T04814(i |   | TSS6402 | 2.306E-10 |
| chr5 | TCONS_00067729 | XLOC_060227 | 23674130 | 23674469 | + | 1 | OS05G0481500 | CUFF.9490 OS05T04815(x |   | TSS6402 | 1.279E-73 |
| chr5 | TCONS_00072643 | XLOC_060227 | 23674388 | 23675216 | + | 1 | OS05G0481500 | CUFF.1212 OS05T04815(i |   | TSS6402 | 2.547E-10 |
| chr5 | TCONS_00067767 | XLOC_060265 | 23991540 | 23991742 | + | 1 | OS05G0487600 | CUFF.9500 OS05T04876(i |   | TSS6406 | 0         |
| chr5 | TCONS_00072653 | XLOC_060287 | 24109103 | 24109712 | + | 1 | OS05G0490500 | CUFF.1215 OS05T04905(x |   | TSS6408 | 0.11113   |
| chr5 | TCONS_00072655 | XLOC_060292 | 24134373 | 24134624 | + | 1 | CAM2         | CUFF.1216 OS05T04911(i |   | TSS6409 | 2.542E-23 |
| chr5 | TCONS_00067815 | XLOC_060315 | 24323274 | 24323557 | + | 1 | OS05G0495250 | CUFF.9523 OS05T04952(x |   | TSS6411 | 0         |
| chr5 | TCONS_00072661 | XLOC_060332 | 24454009 | 24454403 | + | 1 | NA           | CUFF.1218 NA           | u | TSS6413 | 3.56E-10  |
| chr5 | TCONS_00072667 | XLOC_060353 | 24542341 | 24542587 | + | 1 | NA           | CUFF.1219 NA           | u | TSS6416 | 7.959E-31 |
| chr5 | TCONS_00067856 | XLOC_060361 | 24591328 | 24591546 | + | 1 | OS05G0499500 | CUFF.9543 OS05T04995(i |   | TSS6417 | 4.391E-34 |
| chr5 | TCONS_00072671 | XLOC_060381 | 24673200 | 24673406 | + | 1 | NA           | CUFF.1220 NA           | u | TSS6419 | 1.19E-21  |
| chr5 | TCONS_00072672 | XLOC_060395 | 24763506 | 24763752 | + | 1 | SCAMP3       | CUFF.1221 OS05T05030(i |   | TSS6420 | 6.821E-10 |
| chr5 | TCONS_00067915 | XLOC_060420 | 25020708 | 25020914 | + | 1 | NA           | CUFF.9557 NA           | u | TSS6422 | 2.175E-38 |
| chr5 | TCONS_00072676 | XLOC_060463 | 25333816 | 25334019 | + | 1 | OS05G0511400 | CUFF.1224 OS05T05114(i |   | TSS6427 | 1.399E-43 |
| chr5 | TCONS_00072677 | XLOC_060464 | 25337511 | 25337980 | + | 1 | OS05G0511400 | CUFF.1225 OS05T05114(i |   | TSS6427 | 9.541E-18 |
| chr5 | TCONS_00067968 | XLOC_060471 | 25390377 | 25390605 | + | 1 | NA           | CUFF.9570 NA           | u | TSS6428 | 9.037E-25 |
| chr5 | TCONS_00072682 | XLOC_060554 | 26096791 | 26097053 | + | 1 | OS05G0524200 | CUFF.1227 OS05T05242(x |   | TSS6437 | 6.569E-08 |
| chr5 | TCONS_00072685 | XLOC_060585 | 26242371 | 26242631 | + | 1 | OS05G0528000 | CUFF.1229 OS05T05280(x |   | TSS6440 | 6.174E-32 |
| chr5 | TCONS_00072686 | XLOC_060586 | 26242717 | 26243000 | + | 1 | OS05G0528000 | CUFF.1229 OS05T05280(x |   | TSS6440 | 0.024257  |
| chr5 | TCONS_00068089 | XLOC_060588 | 26252422 | 26252628 | + | 1 | NA           | CUFF.9600 NA           | u | TSS6440 | 8.261E-17 |
| chr5 | TCONS_00072687 | XLOC_060592 | 26280613 | 26280955 | + | 1 | OS05G0529000 | CUFF.1228 OS05T05290(x |   | TSS6441 | 1.131E-49 |
| chr5 | TCONS_00072696 | XLOC_060690 | 26904662 | 26904882 | + | 1 | OS05G0541900 | CUFF.1417 OS05T05419(i |   | TSS6451 | 1.256E-46 |
| chr5 | TCONS_00068197 | XLOC_060693 | 26916336 | 26916565 | + | 1 | OS05G0542200 | CUFF.9633 OS05T05422(i |   | TSS6452 | 9.587E-28 |
| chr5 | TCONS_00072698 | XLOC_060709 | 26969164 | 26969398 | + | 1 | OS05G0543400 | CUFF.1426 OS05T05434(i |   | TSS6453 | 7.264E-12 |
| chr5 | TCONS_00072700 | XLOC_060735 | 27179325 | 27179658 | + | 1 | OS05G0547850 | CUFF.1436 OS05T05478(x |   | TSS6456 | 1.361E-38 |

|      |                |             |          |          |   |   |              |                         |         |           |
|------|----------------|-------------|----------|----------|---|---|--------------|-------------------------|---------|-----------|
| chr5 | TCONS_00072701 | XLOC_060736 | 27180666 | 27181072 | + | 1 | OS05G0547850 | CUFF.1437 OS05T054785(i | TSS6456 | 3.396E-42 |
| chr5 | TCONS_00068272 | XLOC_060765 | 27355471 | 27355677 | + | 1 | OS05G0550700 | CUFF.9651 OS05T055070(i | TSS6459 | 0         |
| chr5 | TCONS_00068284 | XLOC_060777 | 27453483 | 27453722 | + | 1 | OS05G0552100 | CUFF.9656 OS05T055210(i | TSS6460 | 3.46E-27  |
| chr5 | TCONS_00068290 | XLOC_060783 | 27497982 | 27498182 | + | 1 | NA           | CUFF.9660 NA u          | TSS6461 | 0         |
| chr5 | TCONS_00072709 | XLOC_060829 | 27731092 | 27731507 | + | 1 | OS05G0557500 | CUFF.1233 OS05T055750(x | TSS6466 | 4.872E-56 |
| chr5 | TCONS_00072710 | XLOC_060831 | 27746765 | 27747164 | + | 1 | OS05G0557700 | CUFF.1233 OS05T055770(i | TSS6466 | 1.569E-09 |
| chr5 | TCONS_00068371 | XLOC_060865 | 27984168 | 27984625 | + | 1 | NA           | CUFF.9703 NA u          | TSS6470 | 4.493E-38 |
| chr5 | TCONS_00072718 | XLOC_060871 | 28006966 | 28007278 | + | 1 | OS05G0563050 | CUFF.1236 OS05T056305(x | TSS6470 | 0.000541  |
| chr5 | TCONS_00068385 | XLOC_060880 | 28060556 | 28060777 | + | 1 | NA           | CUFF.9704 NA u          | TSS6471 | 0         |
| chr5 | TCONS_00068387 | XLOC_060882 | 28071003 | 28071208 | + | 1 | NA           | CUFF.9706 NA u          | TSS6471 | 6.786E-89 |
| chr5 | TCONS_00068410 | XLOC_060903 | 28193225 | 28193434 | + | 1 | MPK7         | CUFF.9719 OS05T056640(i | TSS6474 | 1.594E-53 |
| chr5 | TCONS_00072724 | XLOC_060907 | 28208019 | 28208423 | + | 1 | NA           | CUFF.1237 NA u          | TSS6474 | 7.048E-34 |
| chr5 | TCONS_00068429 | XLOC_060925 | 28314223 | 28314454 | + | 1 | NA           | CUFF.9720 NA u          | TSS6476 | 2.074E-19 |
| chr5 | TCONS_00072729 | XLOC_060926 | 28314737 | 28315056 | + | 1 | NA           | CUFF.1238 NA u          | TSS6476 | 4.257E-36 |
| chr5 | TCONS_00072733 | XLOC_060978 | 28743393 | 28743622 | + | 1 | NA           | CUFF.1240 NA u          | TSS6482 | 1.583E-71 |
| chr5 | TCONS_00068501 | XLOC_060999 | 28890825 | 28891032 | + | 1 | OS05G0580500 | CUFF.9736 OS05T058050(i | TSS6484 | 0         |
| chr5 | TCONS_00072739 | XLOC_061002 | 28905815 | 28906182 | + | 1 | OS05G0580900 | CUFF.1241 OS05T058090(x | TSS6485 | 5.596E-40 |
| chr5 | TCONS_00072741 | XLOC_061003 | 28907282 | 28907838 | + | 1 | OS05G0580900 | CUFF.1242 OS05T058090(i | TSS6485 | 6.994E-29 |
| chr5 | TCONS_00068505 | XLOC_061004 | 28909155 | 28909375 | + | 1 | OS05G0580900 | CUFF.9745 OS05T058090(i | TSS6485 | 7.708E-37 |
| chr5 | TCONS_00068536 | XLOC_061031 | 29069084 | 29069412 | + | 1 | OS05G0584200 | CUFF.9752 OS05T058420(x | TSS6488 | 2.58E-41  |
| chr5 | TCONS_00072745 | XLOC_061045 | 29160857 | 29161115 | + | 1 | OS05G0585900 | CUFF.1244 OS05T058590(i | TSS6489 | 3.414E-08 |
| chr5 | TCONS_00068567 | XLOC_061063 | 29298876 | 29299105 | + | 1 | NA           | CUFF.9758 NA u          | TSS6491 | 1.594E-22 |
| chr5 | TCONS_00072752 | XLOC_061105 | 29548420 | 29548702 | + | 1 | OS05G0593100 | CUFF.1246 OS05T059310(x | TSS6496 | 4.53E-16  |
| chr5 | TCONS_00072754 | XLOC_061109 | 29562731 | 29562946 | + | 1 | NA           | CUFF.1246 NA u          | TSS6496 | 0.022447  |
| chr5 | TCONS_00068692 | XLOC_061179 | 222462   | 222801   | - | 1 | OS05G0104100 | CUFF.8734 OS05T010410(x | TSS6504 | 2.144E-28 |
| chr5 | TCONS_00068720 | XLOC_061205 | 418456   | 418670   | - | 1 | OS05G0107300 | CUFF.8742 OS05T010730(x | TSS6507 | 1.839E-35 |
| chr5 | TCONS_00072762 | XLOC_061216 | 489618   | 489948   | - | 1 | NA           | CUFF.1117 NA u          | TSS6508 | 2.377E-46 |
| chr5 | TCONS_00068731 | XLOC_061220 | 493164   | 493481   | - | 1 | OS05G0108800 | CUFF.8753 OS05T010880(x | TSS6508 | 0         |
| chr5 | TCONS_00068788 | XLOC_061274 | 927898   | 928107   | - | 1 | OS05G0117600 | CUFF.8767 OS05T011760(i | TSS6514 | 1.287E-56 |
| chr5 | TCONS_00072768 | XLOC_061275 | 933639   | 934334   | - | 1 | OS05G0117600 | CUFF.1121 OS05T011760(x | TSS6514 | 9.077E-33 |
| chr5 | TCONS_00072772 | XLOC_061298 | 1082655  | 1083016  | - | 1 | NA           | CUFF.1121 NA u          | TSS6517 | 3.414E-08 |
| chr5 | TCONS_00072774 | XLOC_061322 | 1285335  | 1285570  | - | 1 | OS05G0123100 | CUFF.1123 OS05T012310(x | TSS6519 | 5.476E-35 |
| chr5 | TCONS_00068839 | XLOC_061323 | 1293104  | 1293329  | - | 1 | OS05G0123200 | CUFF.8787 OS05T012320(i | TSS6519 | 5.553E-31 |
| chr5 | TCONS_00072775 | XLOC_061336 | 1427309  | 1427538  | - | 1 | SIZ1         | CUFF.1124 OS05T012500(i | TSS6520 | 1.739E-22 |
| chr5 | TCONS_00068877 | XLOC_061363 | 1647782  | 1647998  | - | 1 | NA           | CUFF.8796 NA u          | TSS6523 | 9.83E-24  |

|      |                |             |         |         |   |   |              |                        |   |         |           |
|------|----------------|-------------|---------|---------|---|---|--------------|------------------------|---|---------|-----------|
| chr5 | TCONS_00072779 | XLOC_061363 | 1647832 | 1648150 | - | 1 | NA           | CUFF.1123 NA           | u | TSS6523 | 2.015E-57 |
| chr5 | TCONS_00068886 | XLOC_061371 | 1706688 | 1706975 | - | 1 | OS05G0129100 | CUFF.8805 OS05T01291(x |   | TSS6524 | 1.03E-46  |
| chr5 | TCONS_00068930 | XLOC_061408 | 2012853 | 2013122 | - | 1 | OS05G0134400 | CUFF.8816 OS05T01344(i |   | TSS6528 | 1.827E-30 |
| chr5 | TCONS_00068938 | XLOC_061416 | 2089182 | 2090291 | - | 1 | SAM1         | CUFF.8881 OS05T01357(i |   | TSS6529 | 1.534E-16 |
| chr5 | TCONS_00072784 | XLOC_061419 | 2096757 | 2097136 | - | 1 | OS05G0135800 | CUFF.1127 OS05T01358(i |   | TSS6529 | 6.568E-33 |
| chr5 | TCONS_00068941 | XLOC_061420 | 2097829 | 2098058 | - | 1 | OS05G0135800 | CUFF.8831 OS05T01358(i |   | TSS6529 | 3.734E-31 |
| chr5 | TCONS_00068947 | XLOC_061427 | 2145611 | 2146278 | - | 1 | OS05G0136900 | CUFF.8822 OS05T01369(i |   | TSS6530 | 4.222E-82 |
| chr5 | TCONS_00068948 | XLOC_061428 | 2146740 | 2147046 | - | 1 | OS05G0136900 | CUFF.8823 OS05T01369(i |   | TSS6530 | 4.488E-72 |
| chr5 | TCONS_00068949 | XLOC_061429 | 2147182 | 2147695 | - | 1 | OS05G0136900 | CUFF.8824 OS05T01369(i |   | TSS6530 | 9.416E-28 |
| chr5 | TCONS_00068950 | XLOC_061430 | 2148226 | 2148615 | - | 1 | OS05G0136900 | CUFF.8825 OS05T01369(i |   | TSS6530 | 4.042E-30 |
| chr5 | TCONS_00068976 | XLOC_061456 | 2334037 | 2334244 | - | 1 | OS05G0140500 | CUFF.8835 OS05T01405(x |   | TSS6533 | 0         |
| chr5 | TCONS_00072793 | XLOC_061494 | 2506934 | 2507291 | - | 1 | OS05G0143400 | CUFF.1129 OS05T01434(x |   | TSS6537 | 2.497E-05 |
| chr5 | TCONS_00069015 | XLOC_061495 | 2512077 | 2512656 | - | 1 | OS05G0143500 | CUFF.8850 OS05T01435(i |   | TSS6537 | 8.252E-13 |
| chr5 | TCONS_00069023 | XLOC_061502 | 2536830 | 2537366 | - | 1 | NA           | CUFF.8840 NA           | u | TSS6538 | 1.18E-66  |
| chr5 | TCONS_00069059 | XLOC_061538 | 2794714 | 2794923 | - | 1 | OS05G0148800 | CUFF.8853 OS05T01488(x |   | TSS6542 | 5.157E-70 |
| chr5 | TCONS_00069065 | XLOC_061544 | 2809951 | 2810152 | - | 1 | NA           | CUFF.8854 NA           | u | TSS6542 | 0         |
| chr5 | TCONS_00072804 | XLOC_061573 | 2963259 | 2963460 | - | 1 | NA           | CUFF.1133 NA           | u | TSS6545 | 6.268E-22 |
| chr5 | TCONS_00072805 | XLOC_061599 | 3204113 | 3204322 | - | 1 | NA           | CUFF.1133 NA           | u | TSS6549 | 8.51E-46  |
| chr5 | TCONS_00069132 | XLOC_061603 | 3209136 | 3209372 | - | 1 | OS05G0154700 | CUFF.8883 OS05T01547(i |   | TSS6549 | 1.345E-24 |
| chr5 | TCONS_00069146 | XLOC_061616 | 3270836 | 3271040 | - | 1 | NA           | CUFF.8878 NA           | u | TSS6551 | 0         |
| chr5 | TCONS_00069154 | XLOC_061623 | 3306992 | 3307203 | - | 1 | OS05G0156500 | CUFF.8886 OS05T01565(x |   | TSS6552 | 3.406E-59 |
| chr5 | TCONS_00069157 | XLOC_061626 | 3323855 | 3324283 | - | 1 | OS05G0156800 | CUFF.8888 OS05T01568(i |   | TSS6552 | 2.58E-41  |
| chr5 | TCONS_00072821 | XLOC_061699 | 3842214 | 3842576 | - | 1 | OS05G0165400 | CUFF.1139 OS05T01654(x |   | TSS6560 | 0.0003675 |
| chr5 | TCONS_00072822 | XLOC_061718 | 4076055 | 4076257 | - | 1 | OS05G0167600 | CUFF.1140 OS05T01676(x |   | TSS6562 | 1.501E-13 |
| chr5 | TCONS_00072826 | XLOC_061750 | 4250130 | 4250330 | - | 1 | NA           | CUFF.1141 NA           | u | TSS6565 | 3.249E-27 |
| chr5 | TCONS_00072827 | XLOC_061753 | 4303247 | 4303471 | - | 1 | OS05G0171900 | CUFF.1142 OS05T01719(i |   | TSS6566 | 5.592E-20 |
| chr5 | TCONS_00072831 | XLOC_061815 | 4870804 | 4871261 | - | 1 | NA           | CUFF.1143 NA           | u | TSS6572 | 1.184E-26 |
| chr5 | TCONS_00069351 | XLOC_061816 | 4871464 | 4871695 | - | 1 | NA           | CUFF.8937 NA           | u | TSS6572 | 1.078E-87 |
| chr5 | TCONS_00069423 | XLOC_061885 | 5336786 | 5337000 | - | 1 | OS05G0187000 | CUFF.8961 OS05T01870(x |   | TSS6579 | 1.54E-48  |
| chr5 | TCONS_00069590 | XLOC_062041 | 6826151 | 6826398 | - | 1 | OS05G0210100 | CUFF.8994 OS05T02101(i |   | TSS6596 | 1.804E-06 |
| chr5 | TCONS_00069623 | XLOC_062074 | 7067896 | 7068107 | - | 1 | NA           | CUFF.8998 NA           | u | TSS6599 | 8.074E-47 |
| chr5 | TCONS_00072847 | XLOC_062119 | 7436307 | 7436530 | - | 1 | OS05G0220900 | CUFF.1152 OS05T02209(i |   | TSS6603 | 1.508E-53 |
| chr5 | TCONS_00072848 | XLOC_062177 | 8001729 | 8002037 | - | 1 | TIP4-1       | CUFF.1154 OS05T02317(i |   | TSS6609 | 0.0014412 |
| chr5 | TCONS_00069733 | XLOC_062181 | 8034460 | 8034700 | - | 1 | OS05G0232500 | CUFF.9034 OS05T02325(i |   | TSS6610 | 3.533E-22 |
| chr5 | TCONS_00069734 | XLOC_062182 | 8034933 | 8035536 | - | 1 | OS05G0232500 | CUFF.9035 OS05T02325(i |   | TSS6610 | 4.403E-78 |

|      |                |             |          |          |   |   |              |           |              |   |         |           |
|------|----------------|-------------|----------|----------|---|---|--------------|-----------|--------------|---|---------|-----------|
| chr5 | TCONS_00072851 | XLOC_062199 | 8265900  | 8266213  | - | 1 | NA           | CUFF.1154 | NA           | u | TSS6612 | 1.204E-17 |
| chr5 | TCONS_00069775 | XLOC_062229 | 8442219  | 8442540  | - | 1 | OS05G0238200 | CUFF.9038 | OS05T02382(i |   | TSS6615 | 0         |
| chr5 | TCONS_00069776 | XLOC_062230 | 8442728  | 8442941  | - | 1 | OS05G0238200 | CUFF.9040 | OS05T02382(i |   | TSS6615 | 0         |
| chr5 | TCONS_00069865 | XLOC_062310 | 9432866  | 9433105  | - | 1 | OS05G0255600 | CUFF.9056 | OS05T02556(i |   | TSS6623 | 4.08E-25  |
| chr5 | TCONS_00072865 | XLOC_062318 | 9467769  | 9468108  | - | 1 | OS05G0256100 | CUFF.1159 | OS05T02561(i |   | TSS6624 | 3.796E-39 |
| chr5 | TCONS_00072868 | XLOC_062322 | 9525022  | 9525450  | - | 1 | OS05G0256500 | CUFF.1159 | OS05T02565(x |   | TSS6624 | 1.733E-38 |
| chr5 | TCONS_00069879 | XLOC_062329 | 9586533  | 9586917  | - | 1 | OS05G0257100 | CUFF.9067 | OS05T02571(i |   | TSS6625 | 2.346E-37 |
| chr5 | TCONS_00072872 | XLOC_062340 | 9644315  | 9644608  | - | 1 | NA           | CUFF.1159 | NA           | u | TSS6626 | 9.091E-30 |
| chr5 | TCONS_00069894 | XLOC_062344 | 9649174  | 9649377  | - | 1 | OS05G0258400 | CUFF.9085 | OS05T02584(i |   | TSS6627 | 3.091E-66 |
| chr5 | TCONS_00072875 | XLOC_062371 | 10233274 | 10233690 | - | 1 | OS05G0263100 | CUFF.1160 | OS05T02631(i |   | TSS6630 | 1.399E-43 |
| chr5 | TCONS_00069923 | XLOC_062372 | 10235029 | 10235532 | - | 1 | OS05G0263100 | CUFF.9091 | OS05T02631(i |   | TSS6630 | 3.096E-37 |
| chr5 | TCONS_00072876 | XLOC_062373 | 10236281 | 10236682 | - | 1 | OS05G0263100 | CUFF.1161 | OS05T02631(i |   | TSS6630 | 0.10606   |
| chr5 | TCONS_00072877 | XLOC_062374 | 10237103 | 10238031 | - | 1 | OS05G0263100 | CUFF.1161 | OS05T02631(i |   | TSS6630 | 3.173E-07 |
| chr5 | TCONS_00072878 | XLOC_062375 | 10238232 | 10238835 | - | 1 | OS05G0263100 | CUFF.1161 | OS05T02631(i |   | TSS6630 | 5.463E-13 |
| chr5 | TCONS_00072879 | XLOC_062376 | 10239443 | 10240078 | - | 1 | OS05G0263100 | CUFF.1161 | OS05T02631(i |   | TSS6630 | 6.17E-26  |
| chr5 | TCONS_00072887 | XLOC_062485 | 11673051 | 11673462 | - | 1 | OS05G0279600 | CUFF.1163 | OS05T02796(i |   | TSS6642 | 3.69E-29  |
| chr5 | TCONS_00072888 | XLOC_062487 | 11676112 | 11676313 | - | 1 | OS05G0279600 | CUFF.1163 | OS05T02796(i |   | TSS6642 | 2.943E-20 |
| chr5 | TCONS_00070054 | XLOC_062500 | 12000361 | 12000609 | - | 1 | NCRNA_34880  | CUFF.9104 | NCRNA_3488(x |   | TSS6643 | 8.457E-80 |
| chr5 | TCONS_00072889 | XLOC_062532 | 12453324 | 12453548 | - | 1 | NA           | CUFF.1164 | NA           | u | TSS6646 | 9.482E-43 |
| chr5 | TCONS_00072890 | XLOC_062533 | 12454747 | 12455348 | - | 1 | OS05G0287800 | CUFF.1164 | OS05T02878(i |   | TSS6646 | 1.501E-13 |
| chr5 | TCONS_00072895 | XLOC_062578 | 12996817 | 12997039 | - | 1 | NA           | CUFF.1165 | NA           | u | TSS6651 | 7.869E-14 |
| chr5 | TCONS_00072896 | XLOC_062580 | 13039893 | 13040237 | - | 1 | OS05G0295100 | CUFF.1166 | OS05T02951(i |   | TSS6651 | 2.139E-49 |
| chr5 | TCONS_00072897 | XLOC_062581 | 13040546 | 13040754 | - | 1 | OS05G0295100 | CUFF.1166 | OS05T02951(i |   | TSS6651 | 9.482E-43 |
| chr5 | TCONS_00072900 | XLOC_062628 | 13536680 | 13536939 | - | 1 | OS05G0301600 | CUFF.1168 | OS05T03016(i |   | TSS6656 | 4.766E-28 |
| chr5 | TCONS_00070181 | XLOC_062629 | 13537590 | 13537792 | - | 1 | OS05G0301600 | CUFF.9151 | OS05T03016(i |   | TSS6656 | 0         |
| chr5 | TCONS_00072901 | XLOC_062630 | 13538450 | 13539180 | - | 1 | OS05G0301600 | CUFF.1169 | OS05T03016(i |   | TSS6656 | 6.268E-22 |
| chr5 | TCONS_00072902 | XLOC_062631 | 13539839 | 13540182 | - | 1 | OS05G0301600 | CUFF.1169 | OS05T03016(i |   | TSS6657 | 1.549E-20 |
| chr5 | TCONS_00072903 | XLOC_062633 | 13554940 | 13555353 | - | 1 | NA           | CUFF.1168 | NA           | u | TSS6657 | 5.961E-15 |
| chr5 | TCONS_00072906 | XLOC_062665 | 13778281 | 13778564 | - | 1 | OS05G0305100 | CUFF.1169 | OS05T03051(x |   | TSS6660 | 7.869E-14 |
| chr5 | TCONS_00070237 | XLOC_062688 | 14177779 | 14177998 | - | 1 | NA           | CUFF.9164 | NA           | u | TSS6663 | 2.998E-39 |
| chr5 | TCONS_00070258 | XLOC_062707 | 14409078 | 14409430 | - | 1 | OS05G0313500 | CUFF.9176 | OS05T03135(x |   | TSS6665 | 3.233E-38 |
| chr5 | TCONS_00070267 | XLOC_062716 | 14513077 | 14513290 | - | 1 | OS05G0315200 | CUFF.9181 | OS05T03152(i |   | TSS6666 | 5.54E-17  |
| chr5 | TCONS_00072910 | XLOC_062728 | 14689076 | 14689293 | - | 1 | OS05G0317200 | CUFF.1172 | OS05T03172(i |   | TSS6667 | 4.359E-41 |
| chr5 | TCONS_00070309 | XLOC_062758 | 15046420 | 15046625 | - | 1 | NA           | CUFF.9193 | NA           | u | TSS6670 | 0         |
| chr5 | TCONS_00072916 | XLOC_062759 | 15047694 | 15047923 | - | 1 | SODA         | CUFF.1174 | OS05T03239(i |   | TSS6670 | 6.428E-42 |

|      |                |             |          |          |   |   |              |                        |         |           |
|------|----------------|-------------|----------|----------|---|---|--------------|------------------------|---------|-----------|
| chr5 | TCONS_00070310 | XLOC_062760 | 15048585 | 15048792 | - | 1 | SODA         | CUFF.9197 OS05T03239(i | TSS6670 | 0         |
| chr5 | TCONS_00072923 | XLOC_062880 | 16112261 | 16112621 | - | 1 | NA           | CUFF.1175 NA u         | TSS6683 | 1.512E-25 |
| chr5 | TCONS_00070440 | XLOC_062884 | 16152746 | 16153283 | - | 1 | NA           | CUFF.9219 NA u         | TSS6683 | 0.0023903 |
| chr5 | TCONS_00070513 | XLOC_062953 | 16761624 | 16761911 | - | 1 | NA           | CUFF.9225 NA u         | TSS6690 | 0.023073  |
| chr5 | TCONS_00072929 | XLOC_062953 | 16761481 | 16761551 | - | 1 | NA           | CUFF.1177 NA u         | TSS6690 | 5E-14     |
| chr5 | TCONS_00072932 | XLOC_062972 | 16929197 | 16929549 | - | 1 | OS05G0357200 | CUFF.1178 OS05T03572(i | TSS6692 | 3.839E-19 |
| chr5 | TCONS_00072934 | XLOC_063010 | 17338754 | 17339127 | - | 1 | OS05G0363100 | CUFF.1180 OS05T03631(i | TSS6697 | 2.996E-69 |
| chr5 | TCONS_00070588 | XLOC_063022 | 17452078 | 17452301 | - | 1 | OS05G0364600 | CUFF.9252 OS05T03646(i | TSS6698 | 1.827E-30 |
| chr5 | TCONS_00072939 | XLOC_063046 | 17681033 | 17681326 | - | 1 | OS05G0368100 | CUFF.1181 OS05T03681(x | TSS6700 | 9.234E-38 |
| chr5 | TCONS_00072940 | XLOC_063091 | 17997696 | 17997987 | - | 1 | OS05G0373400 | CUFF.1183 OS05T03734(i | TSS6705 | 7.056E-24 |
| chr5 | TCONS_00072942 | XLOC_063095 | 18012537 | 18012786 | - | 1 | OS05G0373700 | CUFF.1184 OS05T03737(i | TSS6706 | 1.363E-56 |
| chr5 | TCONS_00070670 | XLOC_063102 | 18048378 | 18048584 | - | 1 | OS05G0374500 | CUFF.9273 OS05T03745(x | TSS6706 | 2.27E-40  |
| chr5 | TCONS_00072944 | XLOC_063104 | 18055753 | 18056020 | - | 1 | OS05G0374600 | CUFF.1183 OS05T03746(x | TSS6706 | 4.257E-36 |
| chr5 | TCONS_00072946 | XLOC_063133 | 18355138 | 18355500 | - | 1 | NA           | CUFF.1184 NA u         | TSS6710 | 7.869E-14 |
| chr5 | TCONS_00072947 | XLOC_063141 | 18448099 | 18448368 | - | 1 | NA           | CUFF.1184 NA u         | TSS6711 | 2.514E-28 |
| chr5 | TCONS_00072949 | XLOC_063189 | 18786218 | 18786423 | - | 1 | OS05G0388400 | CUFF.1186 OS05T03884(x | TSS6716 | 1.25E-16  |
| chr5 | TCONS_00070802 | XLOC_063227 | 19119862 | 19120204 | - | 1 | OS05G0393100 | CUFF.9316 OS05T03931(i | TSS6720 | 0         |
| chr5 | TCONS_00070803 | XLOC_063228 | 19121159 | 19121374 | - | 1 | OS05G0393100 | CUFF.9319 OS05T03931(i | TSS6720 | 1.736E-41 |
| chr5 | TCONS_00070840 | XLOC_063264 | 19492901 | 19493103 | - | 1 | OS05G0400800 | CUFF.9330 OS05T04008(i | TSS6723 | 0         |
| chr5 | TCONS_00070865 | XLOC_063289 | 19773025 | 19773269 | - | 1 | OS05G0405900 | CUFF.9348 OS05T04059(i | TSS6726 | 9.093E-16 |
| chr5 | TCONS_00072956 | XLOC_063289 | 19772823 | 19773133 | - | 1 | OS05G0405900 | CUFF.1193 OS05T04059(i | TSS6726 | 1.72E-32  |
| chr5 | TCONS_00072959 | XLOC_063311 | 19895785 | 19896032 | - | 1 | OS05G0407900 | CUFF.1193 OS05T04079(i | TSS6728 | 7.959E-31 |
| chr5 | TCONS_00072961 | XLOC_063315 | 19931470 | 19931868 | - | 1 | SPL9         | CUFF.1193 OS05T04082(i | TSS6729 | 8.779E-14 |
| chr5 | TCONS_00070931 | XLOC_063356 | 20260301 | 20261929 | - | 1 | OS05G0414200 | CUFF.9356 OS05T04142(x | TSS6733 | 2.887E-51 |
| chr5 | TCONS_00072970 | XLOC_063388 | 20480427 | 20480691 | - | 1 | OS05G0418000 | CUFF.1196 OS05T04180(i | TSS6737 | 4.293E-21 |
| chr5 | TCONS_00072971 | XLOC_063407 | 20631513 | 20631791 | - | 1 | CC-1         | CUFF.1197 OS05T04206(i | TSS6739 | 7.869E-14 |
| chr5 | TCONS_00072973 | XLOC_063410 | 20636884 | 20637084 | - | 1 | OS05G0420750 | CUFF.1196 OS05T04207(i | TSS6739 | 3.301E-22 |
| chr5 | TCONS_00072974 | XLOC_063414 | 20664072 | 20664344 | - | 1 | OS05G0421300 | CUFF.1197 OS05T04213(i | TSS6739 | 1.61E-45  |
| chr5 | TCONS_00072975 | XLOC_063416 | 20679180 | 20679381 | - | 1 | OS05G0421600 | CUFF.1197 OS05T04216(x | TSS6740 | 2.448E-64 |
| chr5 | TCONS_00072979 | XLOC_063438 | 20848765 | 20848966 | - | 1 | OS05G0425700 | CUFF.1198 OS05T04257(i | TSS6742 | 2.943E-20 |
| chr5 | TCONS_00071062 | XLOC_063485 | 21196854 | 21197092 | - | 1 | NA           | CUFF.9390 NA u         | TSS6747 | 3.764E-36 |
| chr5 | TCONS_00072984 | XLOC_063513 | 21413882 | 21414155 | - | 1 | OS05G0437200 | CUFF.1200 OS05T04372(x | TSS6750 | 4.047E-49 |
| chr5 | TCONS_00071136 | XLOC_063561 | 21718164 | 21718368 | - | 1 | NA           | CUFF.9407 NA u         | TSS6756 | 0         |
| chr5 | TCONS_00072995 | XLOC_063603 | 22157020 | 22157327 | - | 1 | PHT4         | CUFF.1203 OS05T04511(i | TSS6760 | 1.549E-20 |
| chr5 | TCONS_00072996 | XLOC_063610 | 22198508 | 22198785 | - | 1 | NCRNA_39557  | CUFF.1203 NCRNA_395:x  | TSS6761 | 6.563E-06 |



|      |                |             |          |          |   |   |              |           |              |         |           |           |
|------|----------------|-------------|----------|----------|---|---|--------------|-----------|--------------|---------|-----------|-----------|
| chr5 | TCONS_00073000 | XLOC_063637 | 22426556 | 22426762 | - | 1 | OS05G0456500 | CUFF.1204 | OS05T04565(x | TSS6764 | 5.592E-20 |           |
| chr5 | TCONS_00071223 | XLOC_063644 | 22482511 | 22482744 | - | 1 | OS05G0457800 | CUFF.9438 | OS05T04578(i | TSS6765 | 1.432E-49 |           |
| chr5 | TCONS_00073002 | XLOC_063662 | 22619316 | 22619516 | - | 1 | OS05G0460200 | CUFF.1206 | OS05T04602(x | TSS6766 | 3.249E-27 |           |
| chr5 | TCONS_00071269 | XLOC_063687 | 22766012 | 22767017 | - | 1 | OS05G0463500 | CUFF.9449 | OS05T04635(x | TSS6769 | 9.882E-21 |           |
| chr5 | TCONS_00071308 | XLOC_063724 | 23010964 | 23011172 | - | 1 | AMT2-1       | CUFF.9462 | OS05T04687(x | TSS6773 | 4.81E-71  |           |
| chr5 | TCONS_00071332 | XLOC_063745 | 23206969 | 23207402 | - | 1 | OS05G0472400 | CUFF.9474 | OS05T04724(i | TSS6775 | 1.3E-29   |           |
| chr5 | TCONS_00071333 | XLOC_063747 | 23213971 | 23214184 | - | 1 | NA           | CUFF.9467 | NA           | u       | TSS6776   | 2.074E-19 |
| chr5 | TCONS_00071344 | XLOC_063757 | 23287237 | 23287455 | - | 1 | NA           | CUFF.9473 | NA           | u       | TSS6777   | 4.606E-19 |
| chr5 | TCONS_00071379 | XLOC_063789 | 23509360 | 23509599 | - | 1 | NA           | CUFF.9484 | NA           | u       | TSS6780   | 0.012046  |
| chr5 | TCONS_00073014 | XLOC_063819 | 23729454 | 23729677 | - | 1 | CYP714D1     | CUFF.1212 | OS05T04824(i | TSS6783 | 9.036E-28 |           |
| chr5 | TCONS_00073017 | XLOC_063854 | 23979764 | 23979964 | - | 1 | NA           | CUFF.1213 | NA           | u       | TSS6787   | 6.994E-29 |
| chr5 | TCONS_00073024 | XLOC_063906 | 24272034 | 24272271 | - | 1 | OS05G0494000 | CUFF.1217 | OS05T04940(i | TSS6792 | 4.211E-62 |           |
| chr5 | TCONS_00073028 | XLOC_063916 | 24303212 | 24303691 | - | 1 | NA           | CUFF.1216 | NA           | u       | TSS6793   | 5.222E-10 |
| chr5 | TCONS_00073030 | XLOC_063921 | 24306533 | 24307701 | - | 1 | NA           | CUFF.1217 | NA           | u       | TSS6794   | 0.010087  |
| chr5 | TCONS_00071520 | XLOC_063929 | 24354082 | 24354101 | - | 1 | NA           | CUFF.9526 | NA           | u       | TSS6795   | 0.61467   |
| chr5 | TCONS_00073032 | XLOC_063929 | 24353952 | 24354451 | - | 1 | OS05G0495600 | CUFF.1218 | OS05T04956(x | TSS6795 | 2.216E-26 |           |
| chr5 | TCONS_00071523 | XLOC_063933 | 24362060 | 24362282 | - | 1 | NA           | CUFF.9527 | NA           | u       | TSS6795   | 1.159E-09 |
| chr5 | TCONS_00073034 | XLOC_063934 | 24372715 | 24373091 | - | 1 | OS05G0495900 | CUFF.1219 | OS05T04959(i | TSS6795 | 5.596E-40 |           |
| chr5 | TCONS_00073035 | XLOC_063942 | 24422880 | 24423110 | - | 1 | OS05G0497150 | CUFF.1218 | OS05T04971(x | TSS6796 | 4.498E-46 |           |
| chr5 | TCONS_00073038 | XLOC_063980 | 24697560 | 24697789 | - | 1 | OS05G0501700 | CUFF.1221 | OS05T05017(i | TSS6800 | 1.441E-74 |           |
| chr5 | TCONS_00071588 | XLOC_063997 | 24862691 | 24863101 | - | 1 | NA           | CUFF.9549 | NA           | u       | TSS6802   | 4.872E-51 |
| chr5 | TCONS_00073039 | XLOC_064016 | 25004421 | 25004884 | - | 1 | NA           | CUFF.1222 | NA           | u       | TSS6804   | 0.0001868 |
| chr5 | TCONS_00073041 | XLOC_064018 | 25009738 | 25009961 | - | 1 | OS05G0506200 | CUFF.1222 | OS05T05062(x | TSS6804 | 1.508E-53 |           |
| chr5 | TCONS_00071622 | XLOC_064030 | 25182904 | 25183120 | - | 1 | OS05G0508700 | CUFF.9573 | OS05T05087(x | TSS6805 | 5.156E-70 |           |
| chr5 | TCONS_00071624 | XLOC_064032 | 25186725 | 25186954 | - | 1 | NA           | CUFF.9576 | NA           | u       | TSS6806   | 6.863E-19 |
| chr5 | TCONS_00073051 | XLOC_064082 | 25530813 | 25531305 | - | 1 | OS05G0514800 | CUFF.1225 | OS05T05148(x | TSS6811 | 6.57E-17  |           |
| chr5 | TCONS_00073053 | XLOC_064091 | 25631755 | 25632147 | - | 1 | OS05G0516900 | CUFF.1226 | OS05T05169(x | TSS6812 | 9.158E-23 |           |
| chr5 | TCONS_00073055 | XLOC_064101 | 25714436 | 25714789 | - | 1 | NA           | CUFF.1226 | NA           | u       | TSS6813   | 6.161E-27 |
| chr5 | TCONS_00071731 | XLOC_064132 | 26021322 | 26021613 | - | 1 | HXK5         | CUFF.9623 | OS05T05225(x | TSS6817 | 2.58E-41  |           |
| chr5 | TCONS_00071823 | XLOC_064217 | 26537091 | 26537297 | - | 1 | CBL4         | CUFF.9611 | OS05T05344(x | TSS6826 | 0         |           |
| chr5 | TCONS_00073074 | XLOC_064260 | 26823167 | 26823434 | - | 1 | NA           | CUFF.1413 | NA           | u       | TSS6831   | 1.069E-70 |
| chr5 | TCONS_00071889 | XLOC_064283 | 26933197 | 26933440 | - | 1 | OS05G0542600 | CUFF.9631 | OS05T05426(x | TSS6834 | 2.962E-08 |           |
| chr5 | TCONS_00073082 | XLOC_064301 | 27088670 | 27089037 | - | 1 | NA           | CUFF.1431 | NA           | u       | TSS6836   | 8.602E-50 |
| chr5 | TCONS_00071906 | XLOC_064302 | 27096350 | 27096582 | - | 1 | OS05G0545600 | CUFF.9638 | OS05T05456(i | TSS6836 | 8.316E-26 |           |
| chr5 | TCONS_00071913 | XLOC_064310 | 27172560 | 27172862 | - | 1 | NA           | CUFF.9641 | NA           | u       | TSS6837   | 0         |

|      |                |             |          |          |   |   |              |           |              |         |                   |
|------|----------------|-------------|----------|----------|---|---|--------------|-----------|--------------|---------|-------------------|
| chr5 | TCONS_00071940 | XLOC_064338 | 27365229 | 27365438 | - | 1 | OS05G0550800 | CUFF.9659 | OS05T05508(i | TSS6840 | 1.04E-59          |
| chr5 | TCONS_00071942 | XLOC_064341 | 27374691 | 27374923 | - | 1 | NA           | CUFF.9647 | NA           | u       | TSS6840 8.551E-21 |
| chr5 | TCONS_00073092 | XLOC_064368 | 27542633 | 27542953 | - | 1 | OS05G0554000 | CUFF.1462 | OS05T05540(i | TSS6843 | 9.541E-18         |
| chr5 | TCONS_00073093 | XLOC_064372 | 27553672 | 27553908 | - | 1 | OS05G0554400 | CUFF.1464 | OS05T05544(x | TSS6843 | 1.335E-33         |
| chr5 | TCONS_00073094 | XLOC_064377 | 27602807 | 27603097 | - | 1 | OS05G0555100 | CUFF.1232 | OS05T05551(x | TSS6844 | 0.0002596         |
| chr5 | TCONS_00073097 | XLOC_064388 | 27623883 | 27623971 | - | 1 | NA           | CUFF.1231 | NA           | u       | TSS6845 1.19E-21  |
| chr5 | TCONS_00073100 | XLOC_064391 | 27625451 | 27626066 | - | 1 | NA           | CUFF.1232 | NA           | u       | TSS6845 1.76E-50  |
| chr5 | TCONS_00073101 | XLOC_064392 | 27626307 | 27626775 | - | 1 | NA           | CUFF.1231 | NA           | u       | TSS6845 1.91E-21  |
| chr5 | TCONS_00073102 | XLOC_064393 | 27627192 | 27628200 | - | 1 | NA           | CUFF.1232 | NA           | u       | TSS6845 5.311E-07 |
| chr5 | TCONS_00071993 | XLOC_064394 | 27630060 | 27630870 | - | 1 | NCRNA_35303  | CUFF.9679 | NCRNA_353(x  | TSS6846 | 0                 |
| chr5 | TCONS_00073103 | XLOC_064395 | 27630884 | 27631308 | - | 1 | OS05G0555600 | CUFF.1232 | OS05T05556(x | TSS6846 | 4.227E-82         |
| chr5 | TCONS_00073104 | XLOC_064399 | 27641339 | 27641753 | - | 1 | NA           | CUFF.1233 | NA           | u       | TSS6846 3.987E-41 |
| chr5 | TCONS_00072032 | XLOC_064439 | 27893401 | 27893601 | - | 1 | TULP10       | CUFF.9693 | OS05T05604(x | TSS6850 | 1.654E-75         |
| chr5 | TCONS_00073111 | XLOC_064442 | 27901191 | 27901692 | - | 1 | OS05G0560600 | CUFF.1236 | OS05T05606(i | TSS6851 | 0.0011599         |
| chr5 | TCONS_00073112 | XLOC_064449 | 27929137 | 27929411 | - | 1 | NA           | CUFF.1234 | NA           | u       | TSS6851 3.819E-70 |
| chr5 | TCONS_00073113 | XLOC_064450 | 27935588 | 27935968 | - | 1 | OS05G0561400 | CUFF.1235 | OS05T05614(x | TSS6851 | 0                 |
| chr5 | TCONS_00073116 | XLOC_064476 | 28080558 | 28080875 | - | 1 | U2AF35B      | CUFF.1237 | OS05T05642(i | TSS6854 | 9.526E-05         |
| chr5 | TCONS_00072087 | XLOC_064488 | 28118844 | 28119072 | - | 1 | OS05G0565000 | CUFF.9717 | OS05T05650(x | TSS6855 | 3.734E-31         |
| chr5 | TCONS_00073118 | XLOC_064494 | 28155986 | 28156312 | - | 1 | OS05G0565900 | CUFF.1237 | OS05T05659(i | TSS6856 | 1.091E-44         |
| chr5 | TCONS_00072141 | XLOC_064541 | 28576356 | 28576716 | - | 1 | OS05G0573550 | CUFF.9725 | OS05T05735(x | TSS6861 | 9.391E-19         |
| chr5 | TCONS_00072156 | XLOC_064555 | 28658236 | 28658481 | - | 1 | OS05G0575300 | CUFF.9731 | OS05T05753(i | TSS6862 | 2.272E-18         |
| chr5 | TCONS_00073123 | XLOC_064573 | 28797176 | 28797542 | - | 1 | OS05G0578500 | CUFF.1241 | OS05T05785(i | TSS6864 | 5.076E-11         |
| chr5 | TCONS_00073124 | XLOC_064574 | 28801143 | 28801783 | - | 1 | OS05G0578500 | CUFF.1241 | OS05T05785(x | TSS6864 | 2.17E-35          |
| chr5 | TCONS_00072191 | XLOC_064591 | 28915265 | 28915575 | - | 1 | OS05G0581100 | CUFF.9738 | OS05T05811(i | TSS6866 | 3.022E-72         |
| chr5 | TCONS_00072196 | XLOC_064595 | 28941374 | 28941663 | - | 1 | OS05G0581800 | CUFF.9744 | OS05T05818(i | TSS6867 | 1.837E-16         |
| chr5 | TCONS_00073127 | XLOC_064596 | 28941958 | 28942593 | - | 1 | OS05G0581800 | CUFF.1242 | OS05T05818(i | TSS6867 | 5.592E-20         |
| chr5 | TCONS_00073129 | XLOC_064612 | 29039242 | 29039514 | - | 1 | OS05G0583500 | CUFF.1242 | OS05T05835(i | TSS6868 | 2.005E-39         |
| chr5 | TCONS_00072215 | XLOC_064618 | 29064648 | 29065113 | - | 1 | NA           | CUFF.9746 | NA           | u       | TSS6869 7.391E-27 |
| chr5 | TCONS_00073136 | XLOC_064683 | 29507647 | 29508173 | - | 1 | OS05G0592300 | CUFF.1245 | OS05T05923(i | TSS6876 | 5.592E-20         |
| chr5 | TCONS_00072315 | XLOC_064704 | 29657525 | 29657984 | - | 1 | OS05G0595300 | CUFF.9778 | OS05T05953(i | TSS6879 | 2.462E-47         |
| chr5 | TCONS_00073144 | XLOC_064722 | 2848505  | 2848712  | . | 1 | OS05G0149800 | CUFF.1133 | OS05T01498(i | TSS6881 | 4.824E-23         |
| chr5 | TCONS_00073157 | XLOC_064738 | 23352433 | 23352636 | . | 1 | OS05G0475300 | CUFF.1211 | OS05T04753(i | TSS6883 | 2.638E-18         |
| chr5 | TCONS_00073162 | XLOC_064744 | 27318826 | 27319032 | . | 1 | OS05G0550000 | CUFF.1446 | OS05T05500(i | TSS6883 | 4.766E-28         |
| chr5 | TCONS_00072336 | XLOC_064747 | 28908831 | 28909036 | . | 1 | OS05G0580900 | CUFF.9741 | OS05T05809(i | TSS6883 | 2.325E-27         |
| chr6 | TCONS_00080984 | XLOC_064843 | 730450   | 730664   | + | 1 | NA           | CUFF.1249 | NA           | u       | TSS6894 3.839E-19 |

|      |                |             |         |         |   |   |              |                         |   |         |           |
|------|----------------|-------------|---------|---------|---|---|--------------|-------------------------|---|---------|-----------|
| chr6 | TCONS_00080986 | XLOC_064845 | 734114  | 734314  | + | 1 | NA           | CUFF.1250 NA            | u | TSS6894 | 1.512E-25 |
| chr6 | TCONS_00080987 | XLOC_064848 | 735499  | 735886  | + | 1 | NA           | CUFF.1250 NA            | u | TSS6894 | 8.626E-16 |
| chr6 | TCONS_00073273 | XLOC_064851 | 742339  | 742559  | + | 1 | OS06G0113150 | CUFF.9810 OS06T011315(i | i | TSS6895 | 1.037E-48 |
| chr6 | TCONS_00073294 | XLOC_064875 | 901772  | 902000  | + | 1 | NA           | CUFF.9814 NA            | u | TSS6897 | 1.672E-17 |
| chr6 | TCONS_00080999 | XLOC_064922 | 1205204 | 1205407 | + | 1 | OS06G0122800 | CUFF.1254 OS06T012280(i | i | TSS6902 | 6.268E-22 |
| chr6 | TCONS_00081001 | XLOC_064941 | 1392724 | 1392979 | + | 1 | OS06G0126000 | CUFF.1255 OS06T012600(x | x | TSS6904 | 2.064E-44 |
| chr6 | TCONS_00081003 | XLOC_064982 | 1645142 | 1645344 | + | 1 | NA           | CUFF.1255 NA            | u | TSS6908 | 7.187E-39 |
| chr6 | TCONS_00073416 | XLOC_064992 | 1727669 | 1727926 | + | 1 | NA           | CUFF.9834 NA            | u | TSS6909 | 0         |
| chr6 | TCONS_00081007 | XLOC_065003 | 1785112 | 1785553 | + | 1 | OS06G0133500 | CUFF.1256 OS06T013350(x | x | TSS6911 | 9.482E-43 |
| chr6 | TCONS_00073432 | XLOC_065008 | 1820722 | 1820961 | + | 1 | NCRNA_1707   | CUFF.9839 NCRNA_1707(x  | x | TSS6911 | 1.003E-14 |
| chr6 | TCONS_00073433 | XLOC_065009 | 1824425 | 1824660 | + | 1 | OS06G0134050 | CUFF.9837 OS06T013405(i | i | TSS6911 | 1.33E-29  |
| chr6 | TCONS_00081022 | XLOC_065133 | 2638797 | 2639079 | + | 1 | OS06G0151200 | CUFF.1261 OS06T015120(i | i | TSS6925 | 1.387E-18 |
| chr6 | TCONS_00073583 | XLOC_065156 | 2753932 | 2754132 | + | 1 | NA           | CUFF.9874 NA            | u | TSS6927 | 0         |
| chr6 | TCONS_00073584 | XLOC_065157 | 2754786 | 2754996 | + | 1 | NA           | CUFF.9872 NA            | u | TSS6927 | 1.736E-41 |
| chr6 | TCONS_00081025 | XLOC_065163 | 2810960 | 2811162 | + | 1 | MPK1         | CUFF.1263 OS06T015450(i | i | TSS6928 | 6.57E-17  |
| chr6 | TCONS_00073693 | XLOC_065259 | 3371950 | 3372243 | + | 1 | NA           | CUFF.9920 NA            | u | TSS6938 | 1.315E-39 |
| chr6 | TCONS_00073705 | XLOC_065270 | 3463971 | 3464191 | + | 1 | OS06G0168800 | CUFF.9912 OS06T016880(i | i | TSS6940 | 7.708E-37 |
| chr6 | TCONS_00073726 | XLOC_065291 | 3675586 | 3675878 | + | 1 | OS06G0172800 | CUFF.9916 OS06T017280(x | x | TSS6942 | 0         |
| chr6 | TCONS_00081046 | XLOC_065387 | 4178255 | 4178592 | + | 1 | NA           | CUFF.1268 NA            | u | TSS6952 | 4.791E-33 |
| chr6 | TCONS_00073820 | XLOC_065388 | 4179693 | 4179907 | + | 1 | NA           | CUFF.9928 NA            | u | TSS6952 | 1.05E-27  |
| chr6 | TCONS_00081047 | XLOC_065388 | 4179775 | 4180040 | + | 1 | NA           | CUFF.1268 NA            | u | TSS6952 | 0.01177   |
| chr6 | TCONS_00081050 | XLOC_065394 | 4183424 | 4183719 | + | 1 | NA           | CUFF.1268 NA            | u | TSS6953 | 9.712E-11 |
| chr6 | TCONS_00081051 | XLOC_065408 | 4260970 | 4261175 | + | 1 | OS06G0184733 | CUFF.1272 OS06T018473(x | x | TSS6954 | 5.592E-20 |
| chr6 | TCONS_00081052 | XLOC_065409 | 4261419 | 4261622 | + | 1 | OS06G0184733 | CUFF.1272 OS06T018473(x | x | TSS6954 | 6.161E-27 |
| chr6 | TCONS_00081053 | XLOC_065419 | 4301522 | 4301841 | + | 1 | OS06G0185500 | CUFF.1270 OS06T018550(x | x | TSS6955 | 1.946E-29 |
| chr6 | TCONS_00081061 | XLOC_065464 | 4692282 | 4692552 | + | 1 | OS06G0193000 | CUFF.1273 OS06T019300(i | i | TSS6960 | 3.756E-57 |
| chr6 | TCONS_00081066 | XLOC_065484 | 4803159 | 4803650 | + | 1 | NA           | CUFF.1273 NA            | u | TSS6962 | 1.502E-66 |
| chr6 | TCONS_00081068 | XLOC_065492 | 4872098 | 4873413 | + | 1 | OS06G0195900 | CUFF.1274 OS06T019590(x | x | TSS6963 | 0.22535   |
| chr6 | TCONS_00081070 | XLOC_065518 | 5069217 | 5069506 | + | 1 | NA           | CUFF.1274 NA            | u | TSS6966 | 2.02E-19  |
| chr6 | TCONS_00073953 | XLOC_065519 | 5069720 | 5070001 | + | 1 | NA           | CUFF.9979 NA            | u | TSS6966 | 0         |
| chr6 | TCONS_00081071 | XLOC_065520 | 5070835 | 5071227 | + | 1 | NA           | CUFF.1274 NA            | u | TSS6966 | 2.024E-10 |
| chr6 | TCONS_00081072 | XLOC_065524 | 5093047 | 5093358 | + | 1 | OS06G0200600 | CUFF.1276 OS06T020060(i | i | TSS6966 | 6.57E-17  |
| chr6 | TCONS_00081073 | XLOC_065525 | 5094451 | 5095630 | + | 1 | OS06G0200600 | CUFF.1276 OS06T020060(i | i | TSS6966 | 4.858E-14 |
| chr6 | TCONS_00081074 | XLOC_065526 | 5095861 | 5096244 | + | 1 | OS06G0200600 | CUFF.1276 OS06T020060(i | i | TSS6967 | 1.271E-32 |
| chr6 | TCONS_00081075 | XLOC_065527 | 5096402 | 5096848 | + | 1 | OS06G0200600 | CUFF.1276 OS06T020060(i | i | TSS6967 | 4.891E-09 |

|      |                |             |         |         |   |   |              |                        |         |           |
|------|----------------|-------------|---------|---------|---|---|--------------|------------------------|---------|-----------|
| chr6 | TCONS_00073960 | XLOC_065528 | 5097077 | 5097844 | + | 1 | OS06G0200600 | CUFF.9996 OS06T02006(x | TSS6967 | 1.222E-32 |
| chr6 | TCONS_00073961 | XLOC_065529 | 5099422 | 5099653 | + | 1 | NA           | CUFF.9983 NA u         | TSS6967 | 5.524E-13 |
| chr6 | TCONS_00073978 | XLOC_065546 | 5198181 | 5198422 | + | 1 | OS06G0202900 | CUFF.9989 OS06T02029(x | TSS6969 | 3.304E-43 |
| chr6 | TCONS_00074017 | XLOC_065583 | 5470566 | 5470770 | + | 1 | OS06G0207700 | CUFF.1000 OS06T02077(x | TSS6973 | 1.469E-71 |
| chr6 | TCONS_00081082 | XLOC_065595 | 5528892 | 5529163 | + | 1 | NA           | CUFF.1276 NA u         | TSS6974 | 1.512E-25 |
| chr6 | TCONS_00081083 | XLOC_065602 | 5584306 | 5584934 | + | 1 | NA           | CUFF.1277 NA u         | TSS6975 | 2.924E-30 |
| chr6 | TCONS_00081084 | XLOC_065632 | 5778832 | 5779112 | + | 1 | NA           | CUFF.1278 NA u         | TSS6978 | 0         |
| chr6 | TCONS_00074068 | XLOC_065635 | 5785182 | 5785658 | + | 1 | OS06G0213400 | CUFF.1001 OS06T02134(i | TSS6978 | 0.085391  |
| chr6 | TCONS_00081086 | XLOC_065635 | 5785298 | 5785824 | + | 1 | OS06G0213400 | CUFF.1279 OS06T02134(x | TSS6979 | 8.889E-09 |
| chr6 | TCONS_00081087 | XLOC_065636 | 5788124 | 5788541 | + | 1 | OS06G0213400 | CUFF.1279 OS06T02134(i | TSS6979 | 4.812E-09 |
| chr6 | TCONS_00081088 | XLOC_065643 | 5837380 | 5837609 | + | 1 | OS06G0214850 | CUFF.1279 OS06T02148(x | TSS6979 | 1.553E-30 |
| chr6 | TCONS_00074078 | XLOC_065648 | 5860427 | 5860797 | + | 1 | OS06G0215200 | CUFF.1002 OS06T02152(i | TSS6980 | 1.136E-14 |
| chr6 | TCONS_00081091 | XLOC_065654 | 5890698 | 5890904 | + | 1 | NA           | CUFF.1279 NA u         | TSS6981 | 2.303E-41 |
| chr6 | TCONS_00081094 | XLOC_065675 | 5986117 | 5986318 | + | 1 | NA           | CUFF.1280 NA u         | TSS6983 | 3.413E-08 |
| chr6 | TCONS_00081098 | XLOC_065679 | 5992132 | 5992384 | + | 1 | NA           | CUFF.1280 NA u         | TSS6983 | 0.01177   |
| chr6 | TCONS_00081101 | XLOC_065688 | 6039697 | 6040007 | + | 1 | OS06G0218150 | CUFF.1281 OS06T02181(i | TSS6984 | 2.02E-19  |
| chr6 | TCONS_00081102 | XLOC_065692 | 6093643 | 6093963 | + | 1 | OS06G0218500 | CUFF.1283 OS06T02185(x | TSS6984 | 7.048E-34 |
| chr6 | TCONS_00074114 | XLOC_065693 | 6095384 | 6095612 | + | 1 | OS06G0218500 | CUFF.1004 OS06T02185(i | TSS6984 | 7.835E-22 |
| chr6 | TCONS_00074117 | XLOC_065696 | 6106351 | 6106713 | + | 1 | NA           | CUFF.1003 NA u         | TSS6985 | 0.12416   |
| chr6 | TCONS_00081103 | XLOC_065697 | 6106729 | 6107118 | + | 1 | NA           | CUFF.1281 NA u         | TSS6985 | 2.303E-41 |
| chr6 | TCONS_00074120 | XLOC_065700 | 6108036 | 6108319 | + | 1 | NA           | CUFF.1003 NA u         | TSS6985 | 6.523E-61 |
| chr6 | TCONS_00081107 | XLOC_065736 | 6410486 | 6410904 | + | 1 | NA           | CUFF.1282 NA u         | TSS6989 | 7.056E-24 |
| chr6 | TCONS_00081109 | XLOC_065740 | 6446601 | 6446801 | + | 1 | OS06G0224200 | CUFF.1283 OS06T02242(i | TSS6989 | 8.25E-41  |
| chr6 | TCONS_00074167 | XLOC_065749 | 6495743 | 6496143 | + | 1 | SK2          | CUFF.1005 OS06T02258(x | TSS6990 | 8.942E-30 |
| chr6 | TCONS_00081111 | XLOC_065758 | 6560041 | 6560381 | + | 1 | OS06G0226600 | CUFF.1284 OS06T02266(x | TSS6991 | 5.012E-18 |
| chr6 | TCONS_00074177 | XLOC_065759 | 6560402 | 6560612 | + | 1 | OS06G0226600 | CUFF.1005 OS06T02266(i | TSS6991 | 3.926E-57 |
| chr6 | TCONS_00074182 | XLOC_065764 | 6590646 | 6590855 | + | 1 | OS06G0226950 | CUFF.1005 OS06T02269(i | TSS6992 | 0         |
| chr6 | TCONS_00074220 | XLOC_065803 | 6824982 | 6825416 | + | 1 | OS06G0232100 | CUFF.1007 OS06T02321(i | TSS6996 | 3.926E-57 |
| chr6 | TCONS_00081115 | XLOC_065841 | 7130550 | 7130750 | + | 1 | OS06G0237200 | CUFF.1286 OS06T02372(i | TSS7000 | 7.056E-24 |
| chr6 | TCONS_00074304 | XLOC_065888 | 7564920 | 7565343 | + | 1 | OS06G0245700 | CUFF.1008 OS06T02457(x | TSS7004 | 0         |
| chr6 | TCONS_00081118 | XLOC_065890 | 7570426 | 7570755 | + | 1 | NA           | CUFF.1288 NA u         | TSS7005 | 8.407E-29 |
| chr6 | TCONS_00081121 | XLOC_065922 | 7804241 | 7804443 | + | 1 | OS06G0250600 | CUFF.1289 OS06T02506(i | TSS7008 | 2.859E-30 |
| chr6 | TCONS_00081124 | XLOC_065936 | 7923657 | 7923981 | + | 1 | NA           | CUFF.1289 NA u         | TSS7009 | 4.787E-13 |
| chr6 | TCONS_00081132 | XLOC_065981 | 8323050 | 8323899 | + | 1 | NCRNA_6454   | CUFF.1292 NCRNA_645(x  | TSS7014 | 0.63406   |
| chr6 | TCONS_00074401 | XLOC_065985 | 8372729 | 8373015 | + | 1 | OS06G0259901 | CUFF.1012 OS06T02599(x | TSS7015 | 3.976E-06 |

|      |                |             |          |          |   |   |              |                         |         |           |           |
|------|----------------|-------------|----------|----------|---|---|--------------|-------------------------|---------|-----------|-----------|
| chr6 | TCONS_00081136 | XLOC_066017 | 8765231  | 8765435  | + | 1 | OS06G0265000 | CUFF.1295 OS06T026500(i | TSS7018 | 7.205E-57 |           |
| chr6 | TCONS_00074437 | XLOC_066023 | 8831675  | 8831876  | + | 1 | NA           | CUFF.1012 NA            | u       | TSS7019   | 0         |
| chr6 | TCONS_00074446 | XLOC_066033 | 8928382  | 8928602  | + | 1 | NA           | CUFF.1013 NA            | u       | TSS7020   | 2.523E-26 |
| chr6 | TCONS_00081142 | XLOC_066063 | 9207860  | 9208219  | + | 1 | OS06G0272800 | CUFF.1296 OS06T027280(i | TSS7023 | 1.217E-41 |           |
| chr6 | TCONS_00074484 | XLOC_066070 | 9258380  | 9258580  | + | 1 | OS06G0273800 | CUFF.1014 OS06T027380(x | TSS7024 | 0         |           |
| chr6 | TCONS_00081147 | XLOC_066110 | 9554740  | 9554947  | + | 1 | NA           | CUFF.1297 NA            | u       | TSS7028   | 1.027E-29 |
| chr6 | TCONS_00081153 | XLOC_066151 | 9895013  | 9895933  | + | 1 | NA           | CUFF.1298 NA            | u       | TSS7033   | 7.799E-12 |
| chr6 | TCONS_00081155 | XLOC_066153 | 9896527  | 9896745  | + | 1 | NA           | CUFF.1298 NA            | u       | TSS7033   | 2.217E-31 |
| chr6 | TCONS_00081159 | XLOC_066160 | 9900651  | 9900863  | + | 1 | NA           | CUFF.1299 NA            | u       | TSS7033   | 4.293E-21 |
| chr6 | TCONS_00081160 | XLOC_066170 | 10016890 | 10017255 | + | 1 | OS06G0283400 | CUFF.1300 OS06T028340(i | TSS7035 | 0.051036  |           |
| chr6 | TCONS_00074676 | XLOC_066262 | 10915696 | 10915919 | + | 1 | OS06G0295500 | CUFF.1019 OS06T029550(i | TSS7044 | 1.738E-21 |           |
| chr6 | TCONS_00074694 | XLOC_066280 | 11060396 | 11060768 | + | 1 | OS06G0298000 | CUFF.1019 OS06T029800(i | TSS7046 | 3.698E-13 |           |
| chr6 | TCONS_00074713 | XLOC_066298 | 11244526 | 11244765 | + | 1 | OS06G0301100 | CUFF.1019 OS06T030110(x | TSS7048 | 0         |           |
| chr6 | TCONS_00081172 | XLOC_066339 | 11743198 | 11743470 | + | 1 | NA           | CUFF.1306 NA            | u       | TSS7052   | 1.508E-30 |
| chr6 | TCONS_00081173 | XLOC_066340 | 11743707 | 11744312 | + | 1 | NA           | CUFF.1307 NA            | u       | TSS7052   | 1.273E-50 |
| chr6 | TCONS_00074773 | XLOC_066358 | 11985134 | 11985463 | + | 1 | NA           | CUFF.1022 NA            | u       | TSS7054   | 0         |
| chr6 | TCONS_00081176 | XLOC_066363 | 11989643 | 11989864 | + | 1 | OS06G0313440 | CUFF.1308 OS06T031344(x | TSS7055 | 1.184E-23 |           |
| chr6 | TCONS_00081177 | XLOC_066364 | 11990632 | 11990911 | + | 1 | NA           | CUFF.1308 NA            | u       | TSS7055   | 1.027E-29 |
| chr6 | TCONS_00074785 | XLOC_066374 | 12079305 | 12079514 | + | 1 | OS06G0314501 | CUFF.1023 OS06T031450(x | TSS7056 | 0         |           |
| chr6 | TCONS_00074817 | XLOC_066401 | 12358744 | 12359552 | + | 1 | OS06G0318800 | CUFF.1024 OS06T031880(x | TSS7059 | 8.033E-78 |           |
| chr6 | TCONS_00074876 | XLOC_066463 | 12999526 | 12999855 | + | 1 | OS06G0329200 | CUFF.1026 OS06T032920(i | TSS7065 | 1.908E-11 |           |
| chr6 | TCONS_00081183 | XLOC_066463 | 12999327 | 12999743 | + | 1 | OS06G0329200 | CUFF.1312 OS06T032920(i | TSS7065 | 1.734E-11 |           |
| chr6 | TCONS_00074902 | XLOC_066487 | 13185064 | 13185272 | + | 1 | NA           | CUFF.1027 NA            | u       | TSS7067   | 0.04715   |
| chr6 | TCONS_00074903 | XLOC_066488 | 13197287 | 13197505 | + | 1 | OS06G0332800 | CUFF.1027 OS06T033280(i | TSS7068 | 8.985E-35 |           |
| chr6 | TCONS_00081184 | XLOC_066489 | 13202252 | 13202518 | + | 1 | OS06G0332900 | CUFF.1312 OS06T033290(x | TSS7068 | 1.339E-23 |           |
| chr6 | TCONS_00081186 | XLOC_066491 | 13204840 | 13205131 | + | 1 | NA           | CUFF.1312 NA            | u       | TSS7068   | 1.131E-49 |
| chr6 | TCONS_00081190 | XLOC_066603 | 14427552 | 14427890 | + | 1 | OS06G0353400 | CUFF.1317 OS06T035340(i | TSS7080 | 2.345E-72 |           |
| chr6 | TCONS_00075055 | XLOC_066634 | 14908070 | 14908276 | + | 1 | OS06G0360600 | CUFF.1031 OS06T036060(i | TSS7083 | 2.717E-30 |           |
| chr6 | TCONS_00075082 | XLOC_066662 | 15382175 | 15382420 | + | 1 | OS06G0367500 | CUFF.1031 OS06T036750(i | TSS7086 | 4.599E-11 |           |
| chr6 | TCONS_00075086 | XLOC_066668 | 15422776 | 15422986 | + | 1 | MPK11        | CUFF.1031 OS06T036790(x | TSS7087 | 1.918E-45 |           |
| chr6 | TCONS_00075113 | XLOC_066696 | 15762388 | 15762608 | + | 1 | OS06G0472700 | CUFF.1032 OS06T047270(i | TSS7089 | 2.734E-35 |           |
| chr6 | TCONS_00075118 | XLOC_066701 | 15821030 | 15821259 | + | 1 | OS06G0473200 | CUFF.1033 OS06T047320(i | TSS7090 | 1.345E-24 |           |
| chr6 | TCONS_00075126 | XLOC_066709 | 15866349 | 15866554 | + | 1 | OS06G0474200 | CUFF.1033 OS06T047420(i | TSS7091 | 0         |           |
| chr6 | TCONS_00075131 | XLOC_066716 | 15922869 | 15923080 | + | 1 | OS06G0474900 | CUFF.1032 OS06T047490(x | TSS7092 | 1.146E-36 |           |
| chr6 | TCONS_00081206 | XLOC_066770 | 16615484 | 16615777 | + | 1 | OS06G0486400 | CUFF.1321 OS06T048640(i | TSS7097 | 3.118E-50 |           |

|      |                |             |          |          |   |   |              |                        |   |         |           |
|------|----------------|-------------|----------|----------|---|---|--------------|------------------------|---|---------|-----------|
| chr6 | TCONS_00075208 | XLOC_066792 | 16798024 | 16798821 | + | 1 | NA           | CUFF.1034 NA           | u | TSS7099 | 0         |
| chr6 | TCONS_00075214 | XLOC_066798 | 16830514 | 16830730 | + | 1 | OS06G0489200 | CUFF.1035 OS06T04892(i |   | TSS7100 | 5.289E-42 |
| chr6 | TCONS_00075225 | XLOC_066808 | 16994048 | 16994304 | + | 1 | OS06G0491800 | CUFF.1035 OS06T04918(x |   | TSS7101 | 7.436E-14 |
| chr6 | TCONS_00081213 | XLOC_066874 | 17600132 | 17600414 | + | 1 | OS06G0499900 | CUFF.1324 OS06T04999(i |   | TSS7108 | 3.907E-44 |
| chr6 | TCONS_00081214 | XLOC_066875 | 17602947 | 17603432 | + | 1 | OS06G0499900 | CUFF.1324 OS06T04999(i |   | TSS7108 | 2.26E-21  |
| chr6 | TCONS_00081216 | XLOC_066906 | 17938152 | 17938457 | + | 1 | NA           | CUFF.1324 NA           | u | TSS7112 | 0.044878  |
| chr6 | TCONS_00081217 | XLOC_066909 | 17944020 | 17944278 | + | 1 | NA           | CUFF.1324 NA           | u | TSS7112 | 0.01177   |
| chr6 | TCONS_00075330 | XLOC_066911 | 17946043 | 17946258 | + | 1 | NA           | CUFF.1038 NA           | u | TSS7112 | 0         |
| chr6 | TCONS_00081219 | XLOC_066915 | 17966631 | 17966956 | + | 1 | OS06G0505302 | CUFF.1326 OS06T05053(i |   | TSS7112 | 1.965E-34 |
| chr6 | TCONS_00075357 | XLOC_066938 | 18117892 | 18118098 | + | 1 | NA           | CUFF.1038 NA           | u | TSS7115 | 4.402E-78 |
| chr6 | TCONS_00075362 | XLOC_066947 | 18152672 | 18153126 | + | 1 | NA           | CUFF.1039 NA           | u | TSS7116 | 0.15664   |
| chr6 | TCONS_00075511 | XLOC_067093 | 20034258 | 20034493 | + | 1 | OS06G0535200 | CUFF.1041 OS06T05352(x |   | TSS7131 | 5.262E-22 |
| chr6 | TCONS_00081235 | XLOC_067104 | 20086911 | 20087115 | + | 1 | NA           | CUFF.1329 NA           | u | TSS7132 | 6.821E-10 |
| chr6 | TCONS_00081236 | XLOC_067105 | 20087411 | 20087808 | + | 1 | NA           | CUFF.1329 NA           | u | TSS7132 | 3.453E-17 |
| chr6 | TCONS_00075562 | XLOC_067143 | 20336373 | 20336573 | + | 1 | OS06G0541600 | CUFF.1043 OS06T05416(i |   | TSS7136 | 0         |
| chr6 | TCONS_00081242 | XLOC_067163 | 20575935 | 20576143 | + | 1 | NA           | CUFF.1331 NA           | u | TSS7138 | 4.824E-23 |
| chr6 | TCONS_00075597 | XLOC_067177 | 20735525 | 20735731 | + | 1 | NA           | CUFF.1043 NA           | u | TSS7139 | 0         |
| chr6 | TCONS_00081243 | XLOC_067191 | 20832274 | 20832475 | + | 1 | NA           | CUFF.1332 NA           | u | TSS7141 | 1.387E-18 |
| chr6 | TCONS_00075684 | XLOC_067265 | 21432494 | 21432701 | + | 1 | OS06G0560400 | CUFF.1045 OS06T05604(i |   | TSS7148 | 3.837E-80 |
| chr6 | TCONS_00081262 | XLOC_067332 | 21958134 | 21958463 | + | 1 | NA           | CUFF.1339 NA           | u | TSS7156 | 1.168E-26 |
| chr6 | TCONS_00081267 | XLOC_067370 | 22295314 | 22295535 | + | 1 | NA           | CUFF.1341 NA           | u | TSS7160 | 3.453E-17 |
| chr6 | TCONS_00081269 | XLOC_067404 | 22592821 | 22593022 | + | 1 | NA           | CUFF.1342 NA           | u | TSS7163 | 7.187E-39 |
| chr6 | TCONS_00081273 | XLOC_067436 | 22808608 | 22809075 | + | 1 | NCRNA_40111  | CUFF.1343 NCRNA_401 x  |   | TSS7166 | 0.0003275 |
| chr6 | TCONS_00075874 | XLOC_067454 | 22978848 | 22979058 | + | 1 | NA           | CUFF.1051 NA           | u | TSS7168 | 0         |
| chr6 | TCONS_00075876 | XLOC_067456 | 22984580 | 22984821 | + | 1 | NA           | CUFF.1051 NA           | u | TSS7168 | 1.135E-31 |
| chr6 | TCONS_00081275 | XLOC_067458 | 22999942 | 23000184 | + | 1 | NA           | CUFF.1344 NA           | u | TSS7169 | 2.217E-31 |
| chr6 | TCONS_00081276 | XLOC_067462 | 23013519 | 23013776 | + | 1 | NA           | CUFF.1344 NA           | u | TSS7169 | 0         |
| chr6 | TCONS_00075906 | XLOC_067489 | 23240720 | 23241225 | + | 1 | NA           | CUFF.1053 NA           | u | TSS7172 | 0         |
| chr6 | TCONS_00075912 | XLOC_067495 | 23293175 | 23293468 | + | 1 | OS06G0592500 | CUFF.1053 OS06T05925(x |   | TSS7172 | 8.985E-35 |
| chr6 | TCONS_00081281 | XLOC_067535 | 23584864 | 23585325 | + | 1 | NA           | CUFF.1347 NA           | u | TSS7177 | 0.0073509 |
| chr6 | TCONS_00081282 | XLOC_067536 | 23585759 | 23586731 | + | 1 | NA           | CUFF.1350 NA           | u | TSS7177 | 2.324E-16 |
| chr6 | TCONS_00081283 | XLOC_067537 | 23587092 | 23587308 | + | 1 | NCRNA_41477  | CUFF.1347 NCRNA_414' x |   | TSS7177 | 1.295E-64 |
| chr6 | TCONS_00081284 | XLOC_067569 | 23856770 | 23857080 | + | 1 | HO1          | CUFF.1349 OS06T06030(i |   | TSS7180 | 1.795E-42 |
| chr6 | TCONS_00075991 | XLOC_067570 | 23862810 | 23863011 | + | 1 | NA           | CUFF.1055 NA           | u | TSS7181 | 2.137E-60 |
| chr6 | TCONS_00081285 | XLOC_067573 | 23877716 | 23877945 | + | 1 | SPX1         | CUFF.1348 OS06T06036(x |   | TSS7181 | 1.326E-28 |

|      |                |             |          |          |   |   |              |                         |   |         |           |
|------|----------------|-------------|----------|----------|---|---|--------------|-------------------------|---|---------|-----------|
| chr6 | TCONS_00081289 | XLOC_067591 | 24007569 | 24007789 | + | 1 | NA           | CUFF.1349 NA            | u | TSS7183 | 5.443E-25 |
| chr6 | TCONS_00081290 | XLOC_067592 | 24008174 | 24008570 | + | 1 | OS06G0605750 | CUFF.1349 OS06T060575(x | x | TSS7183 | 4.931E-79 |
| chr6 | TCONS_00076021 | XLOC_067598 | 24042925 | 24043125 | + | 1 | OS06G0606000 | CUFF.1056 OS06T060600(i | i | TSS7184 | 0         |
| chr6 | TCONS_00076140 | XLOC_067712 | 24932002 | 24932357 | + | 1 | NA           | CUFF.1059 NA            | u | TSS7195 | 1.365E-17 |
| chr6 | TCONS_00076141 | XLOC_067713 | 24932717 | 24933211 | + | 1 | NA           | CUFF.1059 NA            | u | TSS7196 | 4.745E-28 |
| chr6 | TCONS_00081299 | XLOC_067716 | 24947058 | 24947671 | + | 1 | NA           | CUFF.1354 NA            | u | TSS7196 | 9.394E-29 |
| chr6 | TCONS_00076145 | XLOC_067717 | 24948480 | 24948690 | + | 1 | NA           | CUFF.1060 NA            | u | TSS7196 | 0         |
| chr6 | TCONS_00081300 | XLOC_067717 | 24947769 | 24948637 | + | 1 | NA           | CUFF.1354 NA            | u | TSS7196 | 2.542E-23 |
| chr6 | TCONS_00076153 | XLOC_067726 | 25024638 | 25024875 | + | 1 | NA           | CUFF.1060 NA            | u | TSS7197 | 4.042E-30 |
| chr6 | TCONS_00081305 | XLOC_067732 | 25088831 | 25089230 | + | 1 | OS06G0623600 | CUFF.1355 OS06T062360(x | x | TSS7198 | 3.69E-29  |
| chr6 | TCONS_00081311 | XLOC_067823 | 25966734 | 25967048 | + | 1 | OS06G0638900 | CUFF.1358 OS06T063890(i | i | TSS7207 | 1.548E-34 |
| chr6 | TCONS_00076294 | XLOC_067862 | 26191179 | 26191407 | + | 1 | OS06G0643000 | CUFF.1064 OS06T064300(x | x | TSS7211 | 4.378E-29 |
| chr6 | TCONS_00081315 | XLOC_067876 | 26250024 | 26250265 | + | 1 | NA           | CUFF.1360 NA            | u | TSS7213 | 3.56E-10  |
| chr6 | TCONS_00076322 | XLOC_067891 | 26354723 | 26354969 | + | 1 | NA           | CUFF.1066 NA            | u | TSS7214 | 9.345E-20 |
| chr6 | TCONS_00076323 | XLOC_067892 | 26355053 | 26355300 | + | 1 | NA           | CUFF.1066 NA            | u | TSS7214 | 2.717E-30 |
| chr6 | TCONS_00081325 | XLOC_067903 | 26378136 | 26378661 | + | 1 | OS06G0646000 | CUFF.1361 OS06T064600(i | i | TSS7216 | 2.863E-13 |
| chr6 | TCONS_00076333 | XLOC_067908 | 26425139 | 26425564 | + | 1 | OS06G0646700 | CUFF.1067 OS06T064670(i | i | TSS7216 | 0         |
| chr6 | TCONS_00076341 | XLOC_067915 | 26466255 | 26466515 | + | 1 | NA           | CUFF.1067 NA            | u | TSS7217 | 0.079519  |
| chr6 | TCONS_00076343 | XLOC_067917 | 26471239 | 26471468 | + | 1 | NA           | CUFF.1067 NA            | u | TSS7217 | 1.563E-27 |
| chr6 | TCONS_00081326 | XLOC_067918 | 26475989 | 26476267 | + | 1 | NA           | CUFF.1362 NA            | u | TSS7217 | 4.2E-31   |
| chr6 | TCONS_00081328 | XLOC_067920 | 26479586 | 26481225 | + | 1 | NA           | CUFF.1372 NA            | u | TSS7217 | 5.885E-20 |
| chr6 | TCONS_00076347 | XLOC_067921 | 26481844 | 26482605 | + | 1 | OS06G0647900 | CUFF.1372 OS06T064790(x | x | TSS7218 | 3.402E-16 |
| chr6 | TCONS_00081330 | XLOC_067923 | 26485292 | 26485842 | + | 1 | NA           | CUFF.1372 NA            | u | TSS7218 | 1.66E-39  |
| chr6 | TCONS_00081331 | XLOC_067924 | 26488165 | 26488669 | + | 1 | OS06G0648200 | CUFF.1372 OS06T064820(i | i | TSS7218 | 6.991E-52 |
| chr6 | TCONS_00081332 | XLOC_067941 | 26659663 | 26659885 | + | 1 | NA           | CUFF.1363 NA            | u | TSS7220 | 9.712E-11 |
| chr6 | TCONS_00076376 | XLOC_067950 | 26694766 | 26694986 | + | 1 | OS06G0652250 | CUFF.1068 OS06T065225(i | i | TSS7221 | 3.074E-11 |
| chr6 | TCONS_00081334 | XLOC_067965 | 26783439 | 26783765 | + | 1 | OS06G0653900 | CUFF.1364 OS06T065390(i | i | TSS7222 | 9.806E-48 |
| chr6 | TCONS_00076437 | XLOC_068009 | 27124107 | 27124494 | + | 1 | OS06G0659200 | CUFF.1069 OS06T065920(i | i | TSS7227 | 1.279E-73 |
| chr6 | TCONS_00081335 | XLOC_068010 | 27144151 | 27144355 | + | 1 | OS06G0659300 | CUFF.1365 OS06T065930(i | i | TSS7227 | 5.961E-15 |
| chr6 | TCONS_00076454 | XLOC_068025 | 27261838 | 27262039 | + | 1 | OS06G0661500 | CUFF.1070 OS06T066150(i | i | TSS7229 | 8.688E-46 |
| chr6 | TCONS_00076463 | XLOC_068039 | 27365767 | 27366016 | + | 1 | OS06G0663200 | CUFF.1071 OS06T066320(x | x | TSS7230 | 0         |
| chr6 | TCONS_00076465 | XLOC_068041 | 27368050 | 27368277 | + | 1 | OS06G0663200 | CUFF.1071 OS06T066320(i | i | TSS7230 | 7.057E-33 |
| chr6 | TCONS_00081346 | XLOC_068086 | 27708572 | 27709157 | + | 1 | NA           | CUFF.1368 NA            | u | TSS7235 | 1.68E-32  |
| chr6 | TCONS_00076593 | XLOC_068163 | 28182678 | 28183009 | + | 1 | NA           | CUFF.1075 NA            | u | TSS7243 | 6.49E-11  |
| chr6 | TCONS_00076598 | XLOC_068168 | 28198264 | 28198478 | + | 1 | NA           | CUFF.1074 NA            | u | TSS7244 | 1.441E-28 |

|      |                |             |          |          |   |   |              |                         |   |         |           |
|------|----------------|-------------|----------|----------|---|---|--------------|-------------------------|---|---------|-----------|
| chr6 | TCONS_00081358 | XLOC_068168 | 28198414 | 28198625 | + | 1 | NA           | CUFF.1371 NA            | u | TSS7244 | 9.541E-18 |
| chr6 | TCONS_00081363 | XLOC_068235 | 28684940 | 28685242 | + | 1 | OS06G0687700 | CUFF.1374 OS06T068770(x |   | TSS7252 | 1.063E-19 |
| chr6 | TCONS_00081367 | XLOC_068247 | 28755624 | 28756449 | + | 1 | OS06G0689600 | CUFF.1375 OS06T068960(x |   | TSS7254 | 8.913E-37 |
| chr6 | TCONS_00081368 | XLOC_068256 | 28815096 | 28815313 | + | 1 | OS06G0691000 | CUFF.1376 OS06T069100(i |   | TSS7255 | 1.17E-31  |
| chr6 | TCONS_00076747 | XLOC_068286 | 29058516 | 29058755 | + | 1 | NA           | CUFF.1079 NA            | u | TSS7258 | 1.672E-17 |
| chr6 | TCONS_00081374 | XLOC_068314 | 29320477 | 29320736 | + | 1 | NA           | CUFF.1377 NA            | u | TSS7261 | 7.393E-44 |
| chr6 | TCONS_00081375 | XLOC_068315 | 29326338 | 29326543 | + | 1 | NA           | CUFF.1377 NA            | u | TSS7261 | 5.592E-20 |
| chr6 | TCONS_00076775 | XLOC_068318 | 29353897 | 29354549 | + | 1 | OS06G0698802 | CUFF.1079 OS06T069880(x |   | TSS7261 | 6.94E-18  |
| chr6 | TCONS_00081376 | XLOC_068318 | 29354354 | 29354785 | + | 1 | NA           | CUFF.1377 NA            | u | TSS7261 | 2.989E-14 |
| chr6 | TCONS_00076777 | XLOC_068320 | 29363810 | 29364016 | + | 1 | OS06G0698859 | CUFF.1080 OS06T069885(x |   | TSS7262 | 0         |
| chr6 | TCONS_00081378 | XLOC_068324 | 29385013 | 29385216 | + | 1 | OS06G0699200 | CUFF.1378 OS06T069920(i |   | TSS7262 | 2.943E-20 |
| chr6 | TCONS_00081380 | XLOC_068326 | 29386528 | 29386745 | + | 1 | NA           | CUFF.1377 NA            | u | TSS7262 | 8.626E-16 |
| chr6 | TCONS_00081383 | XLOC_068340 | 29518196 | 29518432 | + | 1 | OS06G0701300 | CUFF.1380 OS06T070130(x |   | TSS7264 | 6.604E-06 |
| chr6 | TCONS_00081391 | XLOC_068382 | 29770396 | 29770627 | + | 1 | OS06G0704800 | CUFF.1381 OS06T070480(i |   | TSS7268 | 1.527E-35 |
| chr6 | TCONS_00081394 | XLOC_068400 | 29920516 | 29920928 | + | 1 | NA           | CUFF.1381 NA            | u | TSS7270 | 7.077E-20 |
| chr6 | TCONS_00076907 | XLOC_068448 | 30322720 | 30322928 | + | 1 | NA           | CUFF.1084 NA            | u | TSS7275 | 5.608E-86 |
| chr6 | TCONS_00076923 | XLOC_068465 | 30379631 | 30379902 | + | 1 | OS06G0715600 | CUFF.1085 OS06T071560(x |   | TSS7277 | 0.0092558 |
| chr6 | TCONS_00081400 | XLOC_068476 | 30448917 | 30449168 | + | 1 | OS06G0716700 | CUFF.1385 OS06T071670(i |   | TSS7278 | 2.542E-23 |
| chr6 | TCONS_00081401 | XLOC_068477 | 30449848 | 30450267 | + | 1 | OS06G0716700 | CUFF.1385 OS06T071670(i |   | TSS7278 | 5.979E-50 |
| chr6 | TCONS_00076936 | XLOC_068478 | 30454412 | 30454633 | + | 1 | OS06G0716800 | CUFF.1085 OS06T071680(i |   | TSS7278 | 1.688E-31 |
| chr6 | TCONS_00081407 | XLOC_068530 | 30812409 | 30812691 | + | 1 | NA           | CUFF.1385 NA            | u | TSS7284 | 7.869E-14 |
| chr6 | TCONS_00077007 | XLOC_068546 | 30909303 | 30909514 | + | 1 | OS06G0726600 | CUFF.1087 OS06T072660(x |   | TSS7286 | 2.85E-45  |
| chr6 | TCONS_00081411 | XLOC_068570 | 31034899 | 31035301 | + | 1 | OS06G0728800 | CUFF.1387 OS06T072880(x |   | TSS7288 | 2.529E-33 |
| chr6 | TCONS_00081416 | XLOC_068595 | 31176714 | 31176979 | + | 1 | NA           | CUFF.1388 NA            | u | TSS7291 | 2.162E-23 |
| chr6 | TCONS_00077054 | XLOC_068599 | 31187454 | 31187670 | + | 1 | NA           | CUFF.1088 NA            | u | TSS7291 | 3.901E-09 |
| chr6 | TCONS_00077082 | XLOC_068628 | 169843   | 170368   | - | 1 | OS06G0102300 | CUFF.9784 OS06T010230(i |   | TSS7294 | 2.853E-44 |
| chr6 | TCONS_00077090 | XLOC_068638 | 228441   | 228654   | - | 1 | OS06G0103500 | CUFF.9792 OS06T010350(i |   | TSS7295 | 4.559E-44 |
| chr6 | TCONS_00081425 | XLOC_068651 | 379176   | 379500   | - | 1 | PRMT7        | CUFF.1248 OS06T010550(x |   | TSS7296 | 2.529E-33 |
| chr6 | TCONS_00077124 | XLOC_068669 | 510606   | 510831   | - | 1 | OS06G0108500 | CUFF.9795 OS06T010850(x |   | TSS7298 | 6.622E-39 |
| chr6 | TCONS_00077157 | XLOC_068701 | 791738   | 791955   | - | 1 | NA           | CUFF.9804 NA            | u | TSS7302 | 3.658E-47 |
| chr6 | TCONS_00081427 | XLOC_068713 | 853285   | 853489   | - | 1 | OS06G0115100 | CUFF.1251 OS06T011510(i |   | TSS7303 | 1.508E-53 |
| chr6 | TCONS_00077192 | XLOC_068726 | 923314   | 923889   | - | 1 | OS06G0116600 | CUFF.9818 OS06T011660(i |   | TSS7305 | 0.0092942 |
| chr6 | TCONS_00081431 | XLOC_068727 | 924089   | 924322   | - | 1 | OS06G0116600 | CUFF.1254 OS06T011660(i |   | TSS7305 | 2.115E-35 |
| chr6 | TCONS_00081435 | XLOC_068736 | 941394   | 941705   | - | 1 | NA           | CUFF.1252 NA            | u | TSS7306 | 4.706E-07 |
| chr6 | TCONS_00081436 | XLOC_068737 | 942731   | 943274   | - | 1 | NA           | CUFF.1252 NA            | u | TSS7306 | 7.392E-44 |



|      |                |             |         |         |   |   |              |                        |   |         |           |
|------|----------------|-------------|---------|---------|---|---|--------------|------------------------|---|---------|-----------|
| chr6 | TCONS_00081437 | XLOC_068738 | 943420  | 944032  | - | 1 | NA           | CUFF.1252 NA           | u | TSS7306 | 2.165E-14 |
| chr6 | TCONS_00081438 | XLOC_068739 | 944210  | 944698  | - | 1 | NCRNA_41833  | CUFF.1252 NCRNA_418    | x | TSS7306 | 7.187E-39 |
| chr6 | TCONS_00081439 | XLOC_068740 | 945801  | 946223  | - | 1 | NA           | CUFF.1252 NA           | u | TSS7306 | 1.307E-09 |
| chr6 | TCONS_00081442 | XLOC_068778 | 1362644 | 1362943 | - | 1 | NA           | CUFF.1253 NA           | u | TSS7310 | 7.264E-12 |
| chr6 | TCONS_00081448 | XLOC_068810 | 1555144 | 1556134 | - | 1 | OS06G0129400 | CUFF.1255 OS06T01294(i |   | TSS7314 | 9.036E-28 |
| chr6 | TCONS_00081449 | XLOC_068816 | 1595371 | 1595571 | - | 1 | OS06G0130000 | CUFF.1256 OS06T01300(x |   | TSS7315 | 1.508E-30 |
| chr6 | TCONS_00081450 | XLOC_068838 | 1777265 | 1777474 | - | 1 | OS06G0133200 | CUFF.1256 OS06T01332(x |   | TSS7317 | 1.959E-24 |
| chr6 | TCONS_00077303 | XLOC_068840 | 1780806 | 1781190 | - | 1 | OS06G0133300 | CUFF.9835 OS06T01333(x |   | TSS7317 | 1.839E-17 |
| chr6 | TCONS_00081454 | XLOC_068866 | 1882375 | 1882750 | - | 1 | OS06G0135000 | CUFF.1258 OS06T01350(i |   | TSS7320 | 1.959E-24 |
| chr6 | TCONS_00081455 | XLOC_068867 | 1884429 | 1884738 | - | 1 | OS06G0135000 | CUFF.1258 OS06T01350(i |   | TSS7320 | 9.526E-05 |
| chr6 | TCONS_00077329 | XLOC_068868 | 1887910 | 1888152 | - | 1 | OS06G0135000 | CUFF.9844 OS06T01350(i |   | TSS7320 | 9.195E-12 |
| chr6 | TCONS_00081458 | XLOC_068885 | 2033122 | 2033505 | - | 1 | NCRNA_4533   | CUFF.1258 NCRNA_453    | x | TSS7322 | 1.859E-10 |
| chr6 | TCONS_00081461 | XLOC_068954 | 2462524 | 2462783 | - | 1 | OS06G0147250 | CUFF.1260 OS06T01472(x |   | TSS7330 | 9.09E-07  |
| chr6 | TCONS_00081462 | XLOC_068965 | 2536216 | 2536483 | - | 1 | NA           | CUFF.1260 NA           | u | TSS7331 | 4.215E-54 |
| chr6 | TCONS_00077452 | XLOC_068982 | 2653163 | 2653374 | - | 1 | OS06G0151600 | CUFF.9868 OS06T01516(x |   | TSS7332 | 3.19E-28  |
| chr6 | TCONS_00077459 | XLOC_068989 | 2693272 | 2693544 | - | 1 | NA           | CUFF.9871 NA           | u | TSS7333 | 2.492E-17 |
| chr6 | TCONS_00077518 | XLOC_069050 | 3052263 | 3052826 | - | 1 | OS06G0159900 | CUFF.9895 OS06T01599(i |   | TSS7339 | 1.497E-14 |
| chr6 | TCONS_00077550 | XLOC_069081 | 3206874 | 3207107 | - | 1 | NA           | CUFF.9897 NA           | u | TSS7343 | 1.11E-13  |
| chr6 | TCONS_00077570 | XLOC_069101 | 3338202 | 3338402 | - | 1 | NA           | CUFF.9905 NA           | u | TSS7345 | 0         |
| chr6 | TCONS_00081479 | XLOC_069126 | 3634175 | 3634442 | - | 1 | OS06G0171900 | CUFF.1266 OS06T01719(i |   | TSS7347 | 1.027E-29 |
| chr6 | TCONS_00081480 | XLOC_069127 | 3637249 | 3637499 | - | 1 | OS06G0171900 | CUFF.1266 OS06T01719(i |   | TSS7347 | 4.518E-47 |
| chr6 | TCONS_00077599 | XLOC_069128 | 3639916 | 3640138 | - | 1 | NA           | CUFF.9911 NA           | u | TSS7348 | 3.755E-26 |
| chr6 | TCONS_00081482 | XLOC_069175 | 4009850 | 4010325 | - | 1 | OS06G0181100 | CUFF.1267 OS06T01811(x |   | TSS7352 | 9.819E-69 |
| chr6 | TCONS_00077666 | XLOC_069193 | 4094406 | 4094946 | - | 1 | OS06G0182500 | CUFF.9938 OS06T01825(i |   | TSS7354 | 0.018843  |
| chr6 | TCONS_00081487 | XLOC_069221 | 4256381 | 4256780 | - | 1 | OS06G0184700 | CUFF.1272 OS06T01847(i |   | TSS7358 | 5.076E-11 |
| chr6 | TCONS_00077836 | XLOC_069352 | 5183541 | 5183773 | - | 1 | NA           | CUFF.9984 NA           | u | TSS7372 | 4.21E-20  |
| chr6 | TCONS_00081496 | XLOC_069378 | 5373166 | 5373451 | - | 1 | NA           | CUFF.1275 NA           | u | TSS7375 | 6.267E-22 |
| chr6 | TCONS_00077865 | XLOC_069379 | 5373520 | 5373747 | - | 1 | NA           | CUFF.9991 NA           | u | TSS7375 | 1.037E-48 |
| chr6 | TCONS_00077867 | XLOC_069381 | 5377519 | 5377726 | - | 1 | NA           | CUFF.9994 NA           | u | TSS7375 | 2.768E-79 |
| chr6 | TCONS_00077926 | XLOC_069438 | 5809398 | 5809613 | - | 1 | OS06G0214100 | CUFF.1001 OS06T02141(x |   | TSS7381 | 8.414E-63 |
| chr6 | TCONS_00078073 | XLOC_069581 | 6783792 | 6783992 | - | 1 | OS06G0230801 | CUFF.1009 OS06T02308(i |   | TSS7395 | 0         |
| chr6 | TCONS_00078074 | XLOC_069582 | 6784690 | 6784938 | - | 1 | OS06G0230801 | CUFF.1010 OS06T02308(i |   | TSS7395 | 0         |
| chr6 | TCONS_00081509 | XLOC_069583 | 6785416 | 6785728 | - | 1 | OS06G0230801 | CUFF.1288 OS06T02308(i |   | TSS7396 | 0         |
| chr6 | TCONS_00078105 | XLOC_069609 | 6980977 | 6981179 | - | 1 | OS06G0234100 | CUFF.1007 OS06T02341(x |   | TSS7399 | 6.523E-61 |
| chr6 | TCONS_00078150 | XLOC_069656 | 7230583 | 7231160 | - | 1 | OS06G0239200 | CUFF.1008 OS06T02392(x |   | TSS7404 | 2.315E-13 |

|      |                |             |          |          |   |   |              |                        |         |                   |
|------|----------------|-------------|----------|----------|---|---|--------------|------------------------|---------|-------------------|
| chr6 | TCONS_00081523 | XLOC_069695 | 7491937  | 7492140  | - | 1 | OS06G0244100 | CUFF.1288 OS06T02441(i | TSS7408 | 2.638E-18         |
| chr6 | TCONS_00078209 | XLOC_069715 | 7632632  | 7632921  | - | 1 | NA           | CUFF.1008 NA           | u       | TSS7410 3.091E-19 |
| chr6 | TCONS_00081525 | XLOC_069722 | 7698752  | 7698957  | - | 1 | NCRNA_38100  | CUFF.1288 NCRNA_381(x  | TSS7411 | 1.19E-21          |
| chr6 | TCONS_00081529 | XLOC_069740 | 7916320  | 7916669  | - | 1 | NA           | CUFF.1289 NA           | u       | TSS7412 3.249E-27 |
| chr6 | TCONS_00078263 | XLOC_069772 | 8055590  | 8055915  | - | 1 | NA           | CUFF.1009 NA           | u       | TSS7416 2.02E-19  |
| chr6 | TCONS_00081536 | XLOC_069774 | 8060032  | 8061040  | - | 1 | NA           | CUFF.1291 NA           | u       | TSS7416 7.286E-40 |
| chr6 | TCONS_00081537 | XLOC_069775 | 8061542  | 8062650  | - | 1 | NA           | CUFF.1291 NA           | u       | TSS7416 0.75727   |
| chr6 | TCONS_00081539 | XLOC_069827 | 8741291  | 8741539  | - | 1 | OS06G0264500 | CUFF.1294 OS06T02645(i | TSS7422 | 1.748E-37         |
| chr6 | TCONS_00078346 | XLOC_069850 | 8892146  | 8892460  | - | 1 | NCRNA_42346  | CUFF.1013 NCRNA_423·x  | TSS7424 | 3.3E-68           |
| chr6 | TCONS_00078347 | XLOC_069851 | 8892802  | 8893180  | - | 1 | NA           | CUFF.1012 NA           | u       | TSS7424 0.0013713 |
| chr6 | TCONS_00081541 | XLOC_069851 | 8892488  | 8892905  | - | 1 | NA           | CUFF.1294 NA           | u       | TSS7424 1.063E-19 |
| chr6 | TCONS_00078350 | XLOC_069853 | 8895422  | 8895879  | - | 1 | NA           | CUFF.1013 NA           | u       | TSS7425 0         |
| chr6 | TCONS_00081543 | XLOC_069853 | 8895026  | 8895485  | - | 1 | NA           | CUFF.1294 NA           | u       | TSS7425 4.812E-09 |
| chr6 | TCONS_00081551 | XLOC_069914 | 9289394  | 9289598  | - | 1 | OS06G0274300 | CUFF.1296 OS06T02743(x | TSS7431 | 2.542E-23         |
| chr6 | TCONS_00078512 | XLOC_070007 | 10383151 | 10383401 | - | 1 | NA           | CUFF.1017 NA           | u       | TSS7441 1.561E-32 |
| chr6 | TCONS_00081554 | XLOC_070028 | 10638431 | 10638650 | - | 1 | NA           | CUFF.1300 NA           | u       | TSS7443 2.507E-09 |
| chr6 | TCONS_00081555 | XLOC_070029 | 10639765 | 10640038 | - | 1 | NA           | CUFF.1301 NA           | u       | TSS7444 2.02E-70  |
| chr6 | TCONS_00081557 | XLOC_070031 | 10641445 | 10641720 | - | 1 | NA           | CUFF.1300 NA           | u       | TSS7444 9.158E-23 |
| chr6 | TCONS_00081558 | XLOC_070032 | 10641826 | 10642578 | - | 1 | NA           | CUFF.1301 NA           | u       | TSS7444 5.026E-40 |
| chr6 | TCONS_00081559 | XLOC_070033 | 10642692 | 10642903 | - | 1 | NA           | CUFF.1300 NA           | u       | TSS7444 7.048E-34 |
| chr6 | TCONS_00078581 | XLOC_070077 | 10928832 | 10929062 | - | 1 | NA           | CUFF.1018 NA           | u       | TSS7449 6.513E-29 |
| chr6 | TCONS_00081564 | XLOC_070118 | 11272343 | 11272509 | - | 1 | NA           | CUFF.1304 NA           | u       | TSS7453 5.463E-13 |
| chr6 | TCONS_00081567 | XLOC_070121 | 11275823 | 11276099 | - | 1 | NA           | CUFF.1304 NA           | u       | TSS7453 2.923E-67 |
| chr6 | TCONS_00081569 | XLOC_070125 | 11278807 | 11279132 | - | 1 | NA           | CUFF.1304 NA           | u       | TSS7454 0.91658   |
| chr6 | TCONS_00081575 | XLOC_070139 | 11381830 | 11382118 | - | 1 | NA           | CUFF.1305 NA           | u       | TSS7455 6.994E-29 |
| chr6 | TCONS_00081576 | XLOC_070140 | 11382702 | 11382974 | - | 1 | NA           | CUFF.1305 NA           | u       | TSS7455 1.19E-21  |
| chr6 | TCONS_00078640 | XLOC_070141 | 11383209 | 11383551 | - | 1 | NA           | CUFF.1021 NA           | u       | TSS7455 4.236E-45 |
| chr6 | TCONS_00081578 | XLOC_070144 | 11393659 | 11393863 | - | 1 | NA           | CUFF.1305 NA           | u       | TSS7456 5.443E-25 |
| chr6 | TCONS_00081580 | XLOC_070151 | 11463619 | 11463848 | - | 1 | OS06G0303800 | CUFF.1306 OS06T03038(i | TSS7456 | 5.765E-45         |
| chr6 | TCONS_00078670 | XLOC_070172 | 11712840 | 11713075 | - | 1 | OS06G0308800 | CUFF.1022 OS06T03088(x | TSS7459 | 9.037E-25         |
| chr6 | TCONS_00078732 | XLOC_070234 | 12189390 | 12189621 | - | 1 | OS06G0315900 | CUFF.1023 OS06T03159(x | TSS7465 | 6.096E-16         |
| chr6 | TCONS_00078757 | XLOC_070255 | 12355875 | 12356125 | - | 1 | MKRN         | CUFF.1024 OS06T03187(x | TSS7467 | 3.301E-22         |
| chr6 | TCONS_00081589 | XLOC_070256 | 12356211 | 12356418 | - | 1 | MKRN         | CUFF.1309 OS06T03187(x | TSS7467 | 1.063E-19         |
| chr6 | TCONS_00078761 | XLOC_070260 | 12400966 | 12401168 | - | 1 | NA           | CUFF.1024 NA           | u       | TSS7468 0         |
| chr6 | TCONS_00078762 | XLOC_070261 | 12402998 | 12403205 | - | 1 | NA           | CUFF.1024 NA           | u       | TSS7468 0         |

|      |                |             |          |          |   |   |              |                        |         |           |           |
|------|----------------|-------------|----------|----------|---|---|--------------|------------------------|---------|-----------|-----------|
| chr6 | TCONS_00081590 | XLOC_070262 | 12406487 | 12407162 | - | 1 | OS06G0319600 | CUFF.1310 OS06T03196(x | TSS7468 | 3.311E-37 |           |
| chr6 | TCONS_00081591 | XLOC_070269 | 12437152 | 12437451 | - | 1 | OS06G0320100 | CUFF.1310 OS06T03201(x | TSS7469 | 0.024257  |           |
| chr6 | TCONS_00078782 | XLOC_070283 | 12530851 | 12531059 | - | 1 | NCRNA_45223  | CUFF.1025 NCRNA_452(x  | TSS7470 | 0         |           |
| chr6 | TCONS_00078786 | XLOC_070287 | 12552065 | 12552584 | - | 1 | NA           | CUFF.1025 NA           | u       | TSS7470   | 1.315E-08 |
| chr6 | TCONS_00081592 | XLOC_070288 | 12553581 | 12553905 | - | 1 | NA           | CUFF.1310 NA           | u       | TSS7470   | 1.19E-21  |
| chr6 | TCONS_00081593 | XLOC_070289 | 12554180 | 12554547 | - | 1 | NA           | CUFF.1310 NA           | u       | TSS7471   | 2.943E-20 |
| chr6 | TCONS_00081594 | XLOC_070290 | 12555568 | 12555812 | - | 1 | NA           | CUFF.1310 NA           | u       | TSS7471   | 3.396E-42 |
| chr6 | TCONS_00078787 | XLOC_070291 | 12556194 | 12556526 | - | 1 | NA           | CUFF.1025 NA           | u       | TSS7471   | 1.979E-29 |
| chr6 | TCONS_00081595 | XLOC_070291 | 12556392 | 12556800 | - | 1 | NA           | CUFF.1310 NA           | u       | TSS7471   | 6.268E-22 |
| chr6 | TCONS_00078792 | XLOC_070295 | 12562371 | 12562636 | - | 1 | NA           | CUFF.1025 NA           | u       | TSS7471   | 1.61E-15  |
| chr6 | TCONS_00081598 | XLOC_070296 | 12563392 | 12563592 | - | 1 | NA           | CUFF.1311 NA           | u       | TSS7471   | 3.258E-32 |
| chr6 | TCONS_00078795 | XLOC_070299 | 12567412 | 12567655 | - | 1 | NA           | CUFF.1026 NA           | u       | TSS7472   | 0.12886   |
| chr6 | TCONS_00078796 | XLOC_070300 | 12569420 | 12569883 | - | 1 | NA           | CUFF.1026 NA           | u       | TSS7472   | 0.37029   |
| chr6 | TCONS_00078799 | XLOC_070303 | 12607932 | 12608238 | - | 1 | NA           | CUFF.1026 NA           | u       | TSS7472   | 5.665E-63 |
| chr6 | TCONS_00078828 | XLOC_070333 | 12886368 | 12886573 | - | 1 | NA           | CUFF.1026 NA           | u       | TSS7475   | 0         |
| chr6 | TCONS_00078890 | XLOC_070395 | 13542880 | 13543105 | - | 1 | NA           | CUFF.1028 NA           | u       | TSS7482   | 1.121E-17 |
| chr6 | TCONS_00078897 | XLOC_070402 | 13596723 | 13596978 | - | 1 | NA           | CUFF.1028 NA           | u       | TSS7483   | 2.395E-42 |
| chr6 | TCONS_00078916 | XLOC_070419 | 13706964 | 13707232 | - | 1 | OS06G0342750 | CUFF.1029 OS06T03427(x | TSS7484 | 8.467E-21 |           |
| chr6 | TCONS_00078944 | XLOC_070446 | 13950445 | 13950670 | - | 1 | OS06G0347100 | CUFF.1030 OS06T03471(i | TSS7487 | 4.042E-30 |           |
| chr6 | TCONS_00081616 | XLOC_070446 | 13950093 | 13950508 | - | 1 | OS06G0347100 | CUFF.1316 OS06T03471(i | TSS7487 | 1.027E-29 |           |
| chr6 | TCONS_00081617 | XLOC_070450 | 13996729 | 13997002 | - | 1 | OS06G0347700 | CUFF.1316 OS06T03477(i | TSS7488 | 1.508E-30 |           |
| chr6 | TCONS_00081618 | XLOC_070453 | 14008420 | 14008660 | - | 1 | OS06G0347700 | CUFF.1316 OS06T03477(x | TSS7488 | 0.01177   |           |
| chr6 | TCONS_00081621 | XLOC_070479 | 14529749 | 14530480 | - | 1 | OS06G0354700 | CUFF.1316 OS06T03547(x | TSS7491 | 0.95685   |           |
| chr6 | TCONS_00081629 | XLOC_070555 | 15833886 | 15834271 | - | 1 | NA           | CUFF.1319 NA           | u       | TSS7499   | 1.335E-33 |
| chr6 | TCONS_00079123 | XLOC_070621 | 16510427 | 16510750 | - | 1 | OS06G0484600 | CUFF.1033 OS06T04846(i | TSS7506 | 0         |           |
| chr6 | TCONS_00079124 | XLOC_070622 | 16511569 | 16511806 | - | 1 | OS06G0484600 | CUFF.1033 OS06T04846(i | TSS7506 | 3.243E-23 |           |
| chr6 | TCONS_00079190 | XLOC_070676 | 17230417 | 17230866 | - | 1 | NA           | CUFF.1036 NA           | u       | TSS7512   | 1.95E-13  |
| chr6 | TCONS_00079191 | XLOC_070677 | 17232939 | 17233175 | - | 1 | NA           | CUFF.1036 NA           | u       | TSS7512   | 1.986E-34 |
| chr6 | TCONS_00081638 | XLOC_070733 | 17813756 | 17814122 | - | 1 | OS06G0502900 | CUFF.1324 OS06T05029(i | TSS7517 | 1.968E-24 |           |
| chr6 | TCONS_00081640 | XLOC_070737 | 17837741 | 17838124 | - | 1 | OS06G0503400 | CUFF.1326 OS06T05034(i | TSS7518 | 3.295E-55 |           |
| chr6 | TCONS_00081644 | XLOC_070856 | 19316784 | 19317019 | - | 1 | NA           | CUFF.1327 NA           | u       | TSS7530   | 2.005E-39 |
| chr6 | TCONS_00081645 | XLOC_070858 | 19318048 | 19318277 | - | 1 | NA           | CUFF.1327 NA           | u       | TSS7530   | 1.25E-16  |
| chr6 | TCONS_00079401 | XLOC_070890 | 19544951 | 19545188 | - | 1 | OS06G0527100 | CUFF.1041 OS06T05271(i | TSS7533 | 5.54E-17  |           |
| chr6 | TCONS_00081648 | XLOC_070903 | 19669548 | 19669797 | - | 1 | NA           | CUFF.1329 NA           | u       | TSS7535   | 3.301E-22 |
| chr6 | TCONS_00079467 | XLOC_070951 | 20159206 | 20159409 | - | 1 | OS06G0538000 | CUFF.1043 OS06T05380(i | TSS7540 | 0         |           |

|      |                |             |          |          |   |   |              |                          |   |         |           |
|------|----------------|-------------|----------|----------|---|---|--------------|--------------------------|---|---------|-----------|
| chr6 | TCONS_00081655 | XLOC_070972 | 20367207 | 20367449 | - | 1 | NA           | CUFF.1330 NA             | u | TSS7542 | 5.418E-30 |
| chr6 | TCONS_00081656 | XLOC_070976 | 20375751 | 20375990 | - | 1 | OS06G0542150 | CUFF.1332 OS06T0542150(i | i | TSS7543 | 2.859E-30 |
| chr6 | TCONS_00081658 | XLOC_070978 | 20378324 | 20378555 | - | 1 | OS06G0542150 | CUFF.1332 OS06T0542150(i | i | TSS7543 | 5.596E-40 |
| chr6 | TCONS_00081660 | XLOC_070980 | 20379878 | 20380517 | - | 1 | OS06G0542150 | CUFF.1332 OS06T0542150(i | i | TSS7543 | 1.643E-15 |
| chr6 | TCONS_00081661 | XLOC_070981 | 20381437 | 20381797 | - | 1 | NA           | CUFF.1330 NA             | u | TSS7543 | 2.859E-30 |
| chr6 | TCONS_00079573 | XLOC_071059 | 21105134 | 21105360 | - | 1 | NA           | CUFF.1044 NA             | u | TSS7551 | 0         |
| chr6 | TCONS_00081667 | XLOC_071062 | 21107216 | 21107640 | - | 1 | NA           | CUFF.1334 NA             | u | TSS7552 | 1.312E-25 |
| chr6 | TCONS_00081668 | XLOC_071063 | 21110020 | 21110377 | - | 1 | OS06G0554700 | CUFF.1335 OS06T0554700(x | x | TSS7552 | 1.339E-23 |
| chr6 | TCONS_00079578 | XLOC_071067 | 21152149 | 21152371 | - | 1 | NA           | CUFF.1044 NA             | u | TSS7552 | 1.444E-33 |
| chr6 | TCONS_00081671 | XLOC_071069 | 21153487 | 21154000 | - | 1 | NA           | CUFF.1334 NA             | u | TSS7552 | 2.638E-18 |
| chr6 | TCONS_00081673 | XLOC_071071 | 21154603 | 21154805 | - | 1 | NA           | CUFF.1335 NA             | u | TSS7553 | 1.671E-50 |
| chr6 | TCONS_00081675 | XLOC_071073 | 21155565 | 21155908 | - | 1 | NA           | CUFF.1335 NA             | u | TSS7553 | 1.326E-28 |
| chr6 | TCONS_00081676 | XLOC_071074 | 21156019 | 21156403 | - | 1 | NA           | CUFF.1335 NA             | u | TSS7553 | 0.0020338 |
| chr6 | TCONS_00081679 | XLOC_071077 | 21158284 | 21158701 | - | 1 | NA           | CUFF.1335 NA             | u | TSS7553 | 0.0053377 |
| chr6 | TCONS_00081680 | XLOC_071082 | 21186127 | 21186603 | - | 1 | OS06G0556000 | CUFF.1336 OS06T0556000(i | i | TSS7554 | 4.43E-21  |
| chr6 | TCONS_00081682 | XLOC_071116 | 21479255 | 21479521 | - | 1 | OS06G0561000 | CUFF.1338 OS06T0561000(i | i | TSS7557 | 1.339E-23 |
| chr6 | TCONS_00081689 | XLOC_071156 | 21809336 | 21809553 | - | 1 | NA           | CUFF.1338 NA             | u | TSS7562 | 1.815E-17 |
| chr6 | TCONS_00081690 | XLOC_071157 | 21809850 | 21810513 | - | 1 | NA           | CUFF.1338 NA             | u | TSS7562 | 0.0027698 |
| chr6 | TCONS_00081691 | XLOC_071158 | 21810569 | 21811197 | - | 1 | OS06G0565900 | CUFF.1339 OS06T0565900(x | x | TSS7562 | 0.0075517 |
| chr6 | TCONS_00081697 | XLOC_071216 | 22309766 | 22310119 | - | 1 | PP2A1        | CUFF.1342 OS06T0574500(i | i | TSS7568 | 3.353E-60 |
| chr6 | TCONS_00081698 | XLOC_071218 | 22310976 | 22311327 | - | 1 | PP2A1        | CUFF.1342 OS06T0574500(x | x | TSS7568 | 1.761E-15 |
| chr6 | TCONS_00079718 | XLOC_071219 | 22312310 | 22312515 | - | 1 | PP2A1        | CUFF.1050 OS06T0574500(x | x | TSS7568 | 5.053E-76 |
| chr6 | TCONS_00079742 | XLOC_071245 | 22559285 | 22559763 | - | 1 | NA           | CUFF.1049 NA             | u | TSS7571 | 3.19E-28  |
| chr6 | TCONS_00081711 | XLOC_071307 | 23131743 | 23131944 | - | 1 | NA           | CUFF.1345 NA             | u | TSS7578 | 7.187E-39 |
| chr6 | TCONS_00081715 | XLOC_071332 | 23304543 | 23304847 | - | 1 | OS06G0593100 | CUFF.1346 OS06T0593100(i | i | TSS7580 | 3.129E-15 |
| chr6 | TCONS_00081716 | XLOC_071357 | 23502783 | 23502997 | - | 1 | IAA23        | CUFF.1347 OS06T0597000(x | x | TSS7583 | 3.249E-27 |
| chr6 | TCONS_00081718 | XLOC_071360 | 23510404 | 23510608 | - | 1 | NA           | CUFF.1346 NA             | u | TSS7583 | 5.592E-20 |
| chr6 | TCONS_00079861 | XLOC_071364 | 23523653 | 23523869 | - | 1 | NA           | CUFF.1054 NA             | u | TSS7583 | 7.003E-77 |
| chr6 | TCONS_00081719 | XLOC_071364 | 23523804 | 23524143 | - | 1 | NA           | CUFF.1346 NA             | u | TSS7583 | 6.161E-27 |
| chr6 | TCONS_00081725 | XLOC_071417 | 23893038 | 23893241 | - | 1 | NA           | CUFF.1348 NA             | u | TSS7589 | 6.268E-22 |
| chr6 | TCONS_00079923 | XLOC_071423 | 23936981 | 23937213 | - | 1 | OS06G0604500 | CUFF.1056 OS06T0604500(i | i | TSS7590 | 2.943E-29 |
| chr6 | TCONS_00081726 | XLOC_071424 | 23940916 | 23941132 | - | 1 | OS06G0604500 | CUFF.1349 OS06T0604500(i | i | TSS7590 | 9.482E-43 |
| chr6 | TCONS_00081728 | XLOC_071428 | 23970091 | 23970295 | - | 1 | NA           | CUFF.1348 NA             | u | TSS7590 | 2.514E-28 |
| chr6 | TCONS_00081730 | XLOC_071456 | 24220863 | 24221115 | - | 1 | OS06G0608500 | CUFF.1350 OS06T0608500(i | i | TSS7593 | 6.523E-60 |
| chr6 | TCONS_00079986 | XLOC_071492 | 24424650 | 24424900 | - | 1 | NA           | CUFF.1057 NA             | u | TSS7597 | 0.012046  |

|      |                |             |          |          |   |   |              |                        |   |         |           |
|------|----------------|-------------|----------|----------|---|---|--------------|------------------------|---|---------|-----------|
| chr6 | TCONS_00081740 | XLOC_071493 | 24425158 | 24425676 | - | 1 | NA           | CUFF.1352 NA           | u | TSS7597 | 0.0037449 |
| chr6 | TCONS_00079996 | XLOC_071502 | 24493885 | 24494105 | - | 1 | SAP8         | CUFF.1059 OS06T06128(x |   | TSS7598 | 0         |
| chr6 | TCONS_00079998 | XLOC_071504 | 24496719 | 24496954 | - | 1 | OS06G0612900 | CUFF.1058 OS06T06129(i |   | TSS7598 | 3.755E-26 |
| chr6 | TCONS_00081742 | XLOC_071542 | 24831717 | 24831917 | - | 1 | NA           | CUFF.1353 NA           | u | TSS7602 | 3.249E-27 |
| chr6 | TCONS_00081743 | XLOC_071543 | 24832056 | 24832438 | - | 1 | NA           | CUFF.1353 NA           | u | TSS7602 | 1.187E-36 |
| chr6 | TCONS_00080054 | XLOC_071557 | 24921246 | 24921473 | - | 1 | NA           | CUFF.1059 NA           | u | TSS7604 | 5.147E-27 |
| chr6 | TCONS_00080055 | XLOC_071558 | 24921795 | 24922135 | - | 1 | NA           | CUFF.1059 NA           | u | TSS7604 | 2.07E-05  |
| chr6 | TCONS_00081747 | XLOC_071588 | 25099053 | 25099298 | - | 1 | NA           | CUFF.1355 NA           | u | TSS7607 | 0.01177   |
| chr6 | TCONS_00081749 | XLOC_071635 | 25543393 | 25543777 | - | 1 | NA           | CUFF.1357 NA           | u | TSS7612 | 0.0003797 |
| chr6 | TCONS_00080136 | XLOC_071637 | 25547007 | 25547379 | - | 1 | NA           | CUFF.1062 NA           | u | TSS7612 | 5.432E-58 |
| chr6 | TCONS_00081755 | XLOC_071682 | 25923864 | 25924133 | - | 1 | OS06G0638000 | CUFF.1358 OS06T06380(i |   | TSS7617 | 3.492E-07 |
| chr6 | TCONS_00081756 | XLOC_071684 | 25933159 | 25933454 | - | 1 | NA           | CUFF.1358 NA           | u | TSS7617 | 2.863E-13 |
| chr6 | TCONS_00080220 | XLOC_071720 | 26217955 | 26218175 | - | 1 | OS06G0643300 | CUFF.1064 OS06T06433(i |   | TSS7621 | 5.596E-36 |
| chr6 | TCONS_00081757 | XLOC_071720 | 26217732 | 26218009 | - | 1 | OS06G0643300 | CUFF.1359 OS06T06433(i |   | TSS7621 | 3.51E-47  |
| chr6 | TCONS_00081758 | XLOC_071726 | 26263497 | 26263704 | - | 1 | OS06G0644100 | CUFF.1360 OS06T06441(i |   | TSS7621 | 2.248E-36 |
| chr6 | TCONS_00080228 | XLOC_071728 | 26273689 | 26273962 | - | 1 | OS06G0644200 | CUFF.1067 OS06T06442(x |   | TSS7622 | 0.12416   |
| chr6 | TCONS_00080233 | XLOC_071733 | 26283910 | 26284376 | - | 1 | NCRNA_41177  | CUFF.1065 NCRNA_411'x  |   | TSS7622 | 5.181E-28 |
| chr6 | TCONS_00080236 | XLOC_071736 | 26286998 | 26287236 | - | 1 | NA           | CUFF.1065 NA           | u | TSS7623 | 2.51E-31  |
| chr6 | TCONS_00080253 | XLOC_071751 | 26403185 | 26403397 | - | 1 | OS06G0646400 | CUFF.1067 OS06T06464(i |   | TSS7624 | 0         |
| chr6 | TCONS_00080259 | XLOC_071757 | 26426913 | 26427161 | - | 1 | OS06G0646700 | CUFF.1067 OS06T06467(i |   | TSS7625 | 8.769E-09 |
| chr6 | TCONS_00081763 | XLOC_071773 | 26535471 | 26535907 | - | 1 | OS06G0649500 | CUFF.1364 OS06T06495(i |   | TSS7627 | 0.0016153 |
| chr6 | TCONS_00080322 | XLOC_071813 | 26811944 | 26812161 | - | 1 | NA           | CUFF.1069 NA           | u | TSS7631 | 9.843E-39 |
| chr6 | TCONS_00081769 | XLOC_071854 | 27149215 | 27149420 | - | 1 | OS06G0659400 | CUFF.1365 OS06T06594(x |   | TSS7635 | 5.418E-30 |
| chr6 | TCONS_00081774 | XLOC_071869 | 27226889 | 27227560 | - | 1 | NA           | CUFF.1365 NA           | u | TSS7637 | 3.07E-16  |
| chr6 | TCONS_00081775 | XLOC_071870 | 27227757 | 27228075 | - | 1 | NA           | CUFF.1365 NA           | u | TSS7637 | 3.718E-24 |
| chr6 | TCONS_00081776 | XLOC_071871 | 27230270 | 27230536 | - | 1 | NA           | CUFF.1365 NA           | u | TSS7637 | 7.623E-75 |
| chr6 | TCONS_00081777 | XLOC_071872 | 27232903 | 27233290 | - | 1 | OS06G0660800 | CUFF.1366 OS06T06608(x |   | TSS7637 | 1.562E-40 |
| chr6 | TCONS_00080384 | XLOC_071877 | 27253972 | 27254247 | - | 1 | OS06G0661200 | CUFF.1070 OS06T06612(x |   | TSS7638 | 0         |
| chr6 | TCONS_00080387 | XLOC_071880 | 27263200 | 27263419 | - | 1 | OS06G0661600 | CUFF.1070 OS06T06616(i |   | TSS7638 | 6.978E-49 |
| chr6 | TCONS_00081779 | XLOC_071880 | 27263283 | 27263537 | - | 1 | OS06G0661600 | CUFF.1366 OS06T06616(i |   | TSS7638 | 8.556E-85 |
| chr6 | TCONS_00080468 | XLOC_071953 | 27797422 | 27797626 | - | 1 | OS06G0670500 | CUFF.1073 OS06T06705(x |   | TSS7646 | 0         |
| chr6 | TCONS_00080479 | XLOC_071965 | 27869966 | 27870208 | - | 1 | NA           | CUFF.1073 NA           | u | TSS7647 | 6.096E-16 |
| chr6 | TCONS_00081782 | XLOC_071976 | 27961135 | 27961504 | - | 1 | OS06G0673700 | CUFF.1371 OS06T06737(x |   | TSS7648 | 2.943E-20 |
| chr6 | TCONS_00080492 | XLOC_071978 | 27964166 | 27964581 | - | 1 | OS06G0673700 | CUFF.1076 OS06T06737(i |   | TSS7649 | 2.056E-69 |
| chr6 | TCONS_00080516 | XLOC_071999 | 28145624 | 28145837 | - | 1 | OS06G0677500 | CUFF.1074 OS06T06775(x |   | TSS7651 | 3.174E-60 |

|      |                |             |          |          |   |   |              |           |              |   |         |           |
|------|----------------|-------------|----------|----------|---|---|--------------|-----------|--------------|---|---------|-----------|
| chr6 | TCONS_00081785 | XLOC_072004 | 28180539 | 28180991 | - | 1 | NA           | CUFF.1371 | NA           | u | TSS7651 | 1.576E-58 |
| chr6 | TCONS_00080540 | XLOC_072022 | 28292971 | 28293277 | - | 1 | OS06G0679800 | CUFF.1075 | OS06T06798(x |   | TSS7653 | 4.615E-23 |
| chr6 | TCONS_00080557 | XLOC_072040 | 28485570 | 28485912 | - | 1 | NA           | CUFF.1076 | NA           | u | TSS7655 | 0         |
| chr6 | TCONS_00080558 | XLOC_072041 | 28486379 | 28486581 | - | 1 | NA           | CUFF.1077 | NA           | u | TSS7655 | 0         |
| chr6 | TCONS_00081790 | XLOC_072044 | 28493789 | 28493989 | - | 1 | OS06G0683800 | CUFF.1373 | OS06T06838(x |   | TSS7656 | 6.222E-68 |
| chr6 | TCONS_00081792 | XLOC_072067 | 28672683 | 28673056 | - | 1 | OS06G0687500 | CUFF.1374 | OS06T06875(i |   | TSS7658 | 6.569E-08 |
| chr6 | TCONS_00080591 | XLOC_072077 | 28704367 | 28704578 | - | 1 | OS06G0688100 | CUFF.1080 | OS06T06881(i |   | TSS7659 | 4.455E-39 |
| chr6 | TCONS_00081801 | XLOC_072121 | 28992553 | 28992984 | - | 1 | NA           | CUFF.1376 | NA           | u | TSS7664 | 3.301E-22 |
| chr6 | TCONS_00081804 | XLOC_072146 | 29207628 | 29207885 | - | 1 | NCRNA_41367  | CUFF.1377 | NCRNA_413(x  |   | TSS7666 | 1.218E-06 |
| chr6 | TCONS_00080676 | XLOC_072165 | 29399312 | 29399737 | - | 1 | MPK4         | CUFF.1080 | OS06T06994(i |   | TSS7668 | 0         |
| chr6 | TCONS_00080701 | XLOC_072189 | 29623324 | 29623590 | - | 1 | NA           | CUFF.1081 | NA           | u | TSS7671 | 5.147E-27 |
| chr6 | TCONS_00080702 | XLOC_072190 | 29624137 | 29624360 | - | 1 | NA           | CUFF.1081 | NA           | u | TSS7671 | 1.159E-09 |
| chr6 | TCONS_00081809 | XLOC_072199 | 29670987 | 29671291 | - | 1 | OS06G0702800 | CUFF.1380 | OS06T07028(x |   | TSS7672 | 4.706E-07 |
| chr6 | TCONS_00080719 | XLOC_072208 | 29713681 | 29714006 | - | 1 | OS06G0703800 | CUFF.1082 | OS06T07038(i |   | TSS7673 | 6.263E-56 |
| chr6 | TCONS_00080723 | XLOC_072213 | 29751584 | 29751800 | - | 1 | NA           | CUFF.1081 | NA           | u | TSS7673 | 5.052E-48 |
| chr6 | TCONS_00081814 | XLOC_072247 | 29969859 | 29970061 | - | 1 | OS06G0708300 | CUFF.1382 | OS06T07083(x |   | TSS7677 | 3.311E-37 |
| chr6 | TCONS_00081816 | XLOC_072268 | 30126061 | 30126469 | - | 1 | OS06G0712300 | CUFF.1383 | OS06T07123(x |   | TSS7680 | 4.203E-26 |
| chr6 | TCONS_00080831 | XLOC_072309 | 30409104 | 30409629 | - | 1 | OS06G0716000 | CUFF.1085 | OS06T07160(i |   | TSS7684 | 0.44465   |
| chr6 | TCONS_00080862 | XLOC_072339 | 30595028 | 30595239 | - | 1 | OS06G0720000 | CUFF.1093 | OS06T07200(i |   | TSS7687 | 7.226E-54 |
| chr6 | TCONS_00081821 | XLOC_072358 | 30780834 | 30781188 | - | 1 | OS06G0724600 | CUFF.1386 | OS06T07246(i |   | TSS7689 | 6.268E-22 |
| chr6 | TCONS_00081822 | XLOC_072363 | 30820860 | 30821076 | - | 1 | OS06G0724900 | CUFF.1386 | OS06T07249(x |   | TSS7690 | 6.522E-60 |
| chr6 | TCONS_00081825 | XLOC_072390 | 30969164 | 30969644 | - | 1 | OS06G0727700 | CUFF.1387 | OS06T07277(i |   | TSS7693 | 2.02E-19  |
| chr6 | TCONS_00080929 | XLOC_072399 | 31021087 | 31021403 | - | 1 | OS06G0728600 | CUFF.1087 | OS06T07286(x |   | TSS7694 | 6.031E-78 |
| chr6 | TCONS_00081831 | XLOC_072424 | 31133381 | 31133655 | - | 1 | OS06G0730500 | CUFF.1388 | OS06T07305(i |   | TSS7697 | 1.19E-21  |
| chr6 | TCONS_00081836 | XLOC_072449 | 3382276  | 3382481  | . | 1 | OS06G0167100 | CUFF.1265 | OS06T01671(i |   | TSS7699 | 2.542E-23 |
| chr6 | TCONS_00080976 | XLOC_072456 | 27961323 | 27961535 | . | 1 | OS06G0673700 | CUFF.1075 | OS06T06737(i |   | TSS7700 | 6.884E-83 |
| chr7 | TCONS_00081885 | XLOC_072499 | 350596   | 350801   | + | 1 | OS07G0106200 | CUFF.1091 | OS07T01062(i |   | TSS7704 | 1.484E-54 |
| chr7 | TCONS_00088914 | XLOC_072499 | 350725   | 351728   | + | 1 | OS07G0106200 | CUFF.1393 | OS07T01062(i |   | TSS7704 | 4.259E-23 |
| chr7 | TCONS_00081922 | XLOC_072530 | 526181   | 526438   | + | 1 | NA           | CUFF.1090 | NA           | u | TSS7708 | 6.102E-79 |
| chr7 | TCONS_00088917 | XLOC_072533 | 560816   | 561611   | + | 1 | OS07G0110200 | CUFF.1392 | OS07T01102(x |   | TSS7708 | 3.995E-62 |
| chr7 | TCONS_00088918 | XLOC_072544 | 646601   | 646804   | + | 1 | NA           | CUFF.1392 | NA           | u | TSS7710 | 6.161E-27 |
| chr7 | TCONS_00088919 | XLOC_072545 | 647849   | 648190   | + | 1 | NA           | CUFF.1392 | NA           | u | TSS7710 | 1.501E-13 |
| chr7 | TCONS_00081975 | XLOC_072580 | 939378   | 939617   | + | 1 | OS07G0117200 | CUFF.1091 | OS07T01172(x |   | TSS7713 | 1.137E-69 |
| chr7 | TCONS_00088933 | XLOC_072742 | 2143557  | 2143762  | + | 1 | OS07G0141500 | CUFF.1399 | OS07T01415(i |   | TSS7730 | 1.19E-21  |
| chr7 | TCONS_00082211 | XLOC_072807 | 2643266  | 2643468  | + | 1 | NA           | CUFF.1099 | NA           | u | TSS7737 | 4.91E-43  |

|      |                |             |          |          |   |   |              |           |              |         |           |           |
|------|----------------|-------------|----------|----------|---|---|--------------|-----------|--------------|---------|-----------|-----------|
| chr7 | TCONS_00082212 | XLOC_072808 | 2646215  | 2646439  | + | 1 | OS07G0150700 | CUFF.1101 | OS07T01507(i | TSS7737 | 1.073E-53 |           |
| chr7 | TCONS_00082238 | XLOC_072832 | 2803531  | 2803815  | + | 1 | OS07G0153000 | CUFF.1099 | OS07T01530(x | TSS7739 | 9.641E-50 |           |
| chr7 | TCONS_00088942 | XLOC_072918 | 3447662  | 3447910  | + | 1 | OS07G0164300 | CUFF.1406 | OS07T01643(i | TSS7749 | 7.971E-54 |           |
| chr7 | TCONS_00088943 | XLOC_072919 | 3449481  | 3449838  | + | 1 | OS07G0164300 | CUFF.1406 | OS07T01643(i | TSS7749 | 4.489E-41 |           |
| chr7 | TCONS_00088945 | XLOC_072926 | 3476293  | 3476589  | + | 1 | OS07G0164900 | CUFF.1406 | OS07T01649(i | TSS7749 | 1.643E-15 |           |
| chr7 | TCONS_00088946 | XLOC_072927 | 3477549  | 3478359  | + | 1 | NA           | CUFF.1405 | NA           | u       | TSS7749   | 4.153E-05 |
| chr7 | TCONS_00082335 | XLOC_072932 | 3494151  | 3494351  | + | 1 | OS07G0165200 | CUFF.1102 | OS07T01652(x | TSS7750 | 0         |           |
| chr7 | TCONS_00088949 | XLOC_072953 | 3677316  | 3677706  | + | 1 | OS07G0168900 | CUFF.1407 | OS07T01689(x | TSS7753 | 1.339E-23 |           |
| chr7 | TCONS_00088950 | XLOC_072961 | 3721936  | 3722314  | + | 1 | OS07G0170100 | CUFF.1408 | OS07T01701(i | TSS7754 | 2.863E-13 |           |
| chr7 | TCONS_00088953 | XLOC_072977 | 3848986  | 3849269  | + | 1 | OS07G0173200 | CUFF.1408 | OS07T01732(i | TSS7755 | 2.377E-46 |           |
| chr7 | TCONS_00088957 | XLOC_073029 | 4192684  | 4193080  | + | 1 | NA           | CUFF.1410 | NA           | u       | TSS7761   | 2.248E-36 |
| chr7 | TCONS_00088958 | XLOC_073055 | 4460764  | 4461035  | + | 1 | OS07G0184300 | CUFF.1412 | OS07T01843(x | TSS7763 | 2.529E-33 |           |
| chr7 | TCONS_00088960 | XLOC_073077 | 4575580  | 4575802  | + | 1 | TRXH         | CUFF.1414 | OS07T01860(i | TSS7766 | 1.05E-52  |           |
| chr7 | TCONS_00088964 | XLOC_073170 | 5303484  | 5303894  | + | 1 | NA           | CUFF.1417 | NA           | u       | TSS7775   | 1.739E-22 |
| chr7 | TCONS_00088966 | XLOC_073198 | 5575676  | 5576981  | + | 1 | OS07G0203700 | CUFF.1419 | OS07T02037(x | TSS7778 | 2.405E-20 |           |
| chr7 | TCONS_00082634 | XLOC_073213 | 5690334  | 5690645  | + | 1 | NA           | CUFF.1108 | NA           | u       | TSS7780   | 5.697E-80 |
| chr7 | TCONS_00082683 | XLOC_073258 | 6015998  | 6016224  | + | 1 | NA           | CUFF.1109 | NA           | u       | TSS7785   | 7.06E-28  |
| chr7 | TCONS_00088970 | XLOC_073269 | 6109914  | 6110368  | + | 1 | OS07G0211800 | CUFF.1422 | OS07T02118(i | TSS7786 | 6.267E-22 |           |
| chr7 | TCONS_00082696 | XLOC_073271 | 6114910  | 6115122  | + | 1 | OS07G0211800 | CUFF.1111 | OS07T02118(i | TSS7786 | 2.603E-09 |           |
| chr7 | TCONS_00082785 | XLOC_073352 | 7239892  | 7240122  | + | 1 | NA           | CUFF.1113 | NA           | u       | TSS7795   | 0         |
| chr7 | TCONS_00088973 | XLOC_073394 | 7666974  | 7667182  | + | 1 | OS07G0237700 | CUFF.1425 | OS07T02377(i | TSS7799 | 2.216E-26 |           |
| chr7 | TCONS_00082893 | XLOC_073455 | 8324011  | 8324423  | + | 1 | ILL7         | CUFF.1116 | OS07T02497(i | TSS7805 | 1.045E-56 |           |
| chr7 | TCONS_00088977 | XLOC_073515 | 8943432  | 8943661  | + | 1 | NA           | CUFF.1429 | NA           | u       | TSS7812   | 2.02E-19  |
| chr7 | TCONS_00088984 | XLOC_073637 | 10494984 | 10495191 | + | 1 | NA           | CUFF.1433 | NA           | u       | TSS7824   | 4.824E-23 |
| chr7 | TCONS_00088986 | XLOC_073664 | 10716188 | 10716388 | + | 1 | OS07G0281500 | CUFF.1433 | OS07T02815(x | TSS7827 | 3.249E-27 |           |
| chr7 | TCONS_00083142 | XLOC_073696 | 11164984 | 11165184 | + | 1 | NA           | CUFF.1120 | NA           | u       | TSS7830   | 0         |
| chr7 | TCONS_00083159 | XLOC_073712 | 11283609 | 11283834 | + | 1 | OS07G0291100 | CUFF.1121 | OS07T02911(i | TSS7832 | 2.476E-13 |           |
| chr7 | TCONS_00083160 | XLOC_073713 | 11287184 | 11287400 | + | 1 | NA           | CUFF.1120 | NA           | u       | TSS7832   | 5.289E-42 |
| chr7 | TCONS_00088987 | XLOC_073723 | 11433652 | 11434061 | + | 1 | OS07G0294100 | CUFF.1435 | OS07T02941(i | TSS7833 | 2.984E-32 |           |
| chr7 | TCONS_00088988 | XLOC_073734 | 11515663 | 11515995 | + | 1 | OS07G0295200 | CUFF.1435 | OS07T02952(i | TSS7834 | 1.713E-27 |           |
| chr7 | TCONS_00088989 | XLOC_073739 | 11553974 | 11554572 | + | 1 | OS07G0295800 | CUFF.1436 | OS07T02958(i | TSS7834 | 6.428E-42 |           |
| chr7 | TCONS_00083184 | XLOC_073740 | 11555568 | 11555866 | + | 1 | OS07G0295800 | CUFF.1121 | OS07T02958(i | TSS7835 | 0         |           |
| chr7 | TCONS_00088990 | XLOC_073741 | 11558669 | 11559231 | + | 1 | NCRNA_4044   | CUFF.1437 | NCRNA_404(x  | TSS7835 | 1.027E-29 |           |
| chr7 | TCONS_00088992 | XLOC_073743 | 11560580 | 11560801 | + | 1 | OS07G0295800 | CUFF.1438 | OS07T02958(i | TSS7835 | 3.361E-42 |           |
| chr7 | TCONS_00088993 | XLOC_073744 | 11563861 | 11564302 | + | 1 | OS07G0295800 | CUFF.1439 | OS07T02958(i | TSS7835 | 5.961E-15 |           |

|      |                |             |          |          |   |   |              |                        |         |           |           |
|------|----------------|-------------|----------|----------|---|---|--------------|------------------------|---------|-----------|-----------|
| chr7 | TCONS_00088994 | XLOC_073745 | 11564598 | 11565001 | + | 1 | OS07G0295800 | CUFF.1439 OS07T02958(i | TSS7835 | 1.501E-13 |           |
| chr7 | TCONS_00088995 | XLOC_073781 | 11893234 | 11893440 | + | 1 | OS07G0301200 | CUFF.1438 OS07T03012(i | TSS7839 | 1.25E-16  |           |
| chr7 | TCONS_00083262 | XLOC_073822 | 12683453 | 12683689 | + | 1 | OS07G0408100 | CUFF.1123 OS07T04081(i | TSS7843 | 6.723E-15 |           |
| chr7 | TCONS_00083273 | XLOC_073832 | 12786927 | 12787143 | + | 1 | OS07G0409700 | CUFF.1123 OS07T04097(x | TSS7844 | 1.911E-56 |           |
| chr7 | TCONS_00083299 | XLOC_073859 | 13119004 | 13119565 | + | 1 | NA           | CUFF.1124 NA           | u       | TSS7847   | 1.193E-05 |
| chr7 | TCONS_00089005 | XLOC_073859 | 13119232 | 13119664 | + | 1 | NA           | CUFF.1440 NA           | u       | TSS7847   | 1.512E-25 |
| chr7 | TCONS_00083300 | XLOC_073860 | 13120122 | 13120536 | + | 1 | NA           | CUFF.1124 NA           | u       | TSS7847   | 2.836E-46 |
| chr7 | TCONS_00083303 | XLOC_073863 | 13149843 | 13150125 | + | 1 | NA           | CUFF.1124 NA           | u       | TSS7848   | 4.323E-43 |
| chr7 | TCONS_00089008 | XLOC_073863 | 13149901 | 13150339 | + | 1 | NA           | CUFF.1441 NA           | u       | TSS7848   | 5.076E-11 |
| chr7 | TCONS_00089009 | XLOC_073868 | 13151933 | 13152162 | + | 1 | NA           | CUFF.1441 NA           | u       | TSS7848   | 0.01177   |
| chr7 | TCONS_00083310 | XLOC_073869 | 13153965 | 13154188 | + | 1 | NA           | CUFF.1125 NA           | u       | TSS7848   | 1.233E-12 |
| chr7 | TCONS_00083316 | XLOC_073875 | 13172368 | 13172585 | + | 1 | NA           | CUFF.1125 NA           | u       | TSS7849   | 2.053E-55 |
| chr7 | TCONS_00083317 | XLOC_073876 | 13173007 | 13173663 | + | 1 | NCRNA_34393  | CUFF.1125 NCRNA_343(x  | TSS7849 | 3.556E-64 |           |
| chr7 | TCONS_00083318 | XLOC_073876 | 13173840 | 13174164 | + | 1 | NA           | CUFF.1126 NA           | u       | TSS7849   | 0         |
| chr7 | TCONS_00089011 | XLOC_073876 | 13173529 | 13173918 | + | 1 | NCRNA_34393  | CUFF.1442 NCRNA_343(x  | TSS7849 | 1.616E-25 |           |
| chr7 | TCONS_00089017 | XLOC_073885 | 13203414 | 13203668 | + | 1 | NA           | CUFF.1442 NA           | u       | TSS7850   | 1.187E-36 |
| chr7 | TCONS_00083323 | XLOC_073887 | 13204548 | 13204799 | + | 1 | NA           | CUFF.1126 NA           | u       | TSS7850   | 0         |
| chr7 | TCONS_00083360 | XLOC_073921 | 13526309 | 13526532 | + | 1 | OS07G0421200 | CUFF.1127 OS07T04212(i | TSS7854 | 3.716E-17 |           |
| chr7 | TCONS_00083420 | XLOC_073985 | 14510571 | 14510930 | + | 1 | NA           | CUFF.1129 NA           | u       | TSS7860   | 0.016844  |
| chr7 | TCONS_00083421 | XLOC_073986 | 14511644 | 14511893 | + | 1 | NA           | CUFF.1129 NA           | u       | TSS7860   | 4.446E-08 |
| chr7 | TCONS_00083452 | XLOC_074016 | 14861957 | 14862176 | + | 1 | NA           | CUFF.1129 NA           | u       | TSS7863   | 2.998E-39 |
| chr7 | TCONS_00083468 | XLOC_074033 | 15088937 | 15089331 | + | 1 | NA           | CUFF.1130 NA           | u       | TSS7865   | 8.414E-63 |
| chr7 | TCONS_00089032 | XLOC_074039 | 15108165 | 15108429 | + | 1 | NA           | CUFF.1449 NA           | u       | TSS7866   | 6.994E-29 |
| chr7 | TCONS_00089033 | XLOC_074040 | 15119378 | 15119578 | + | 1 | NA           | CUFF.1449 NA           | u       | TSS7866   | 3.301E-22 |
| chr7 | TCONS_00089034 | XLOC_074041 | 15121509 | 15121709 | + | 1 | NA           | CUFF.1450 NA           | u       | TSS7866   | 8.25E-41  |
| chr7 | TCONS_00089036 | XLOC_074043 | 15126156 | 15126359 | + | 1 | NA           | CUFF.1450 NA           | u       | TSS7866   | 6.174E-32 |
| chr7 | TCONS_00089037 | XLOC_074044 | 15127993 | 15128380 | + | 1 | NA           | CUFF.1450 NA           | u       | TSS7866   | 6.158E-32 |
| chr7 | TCONS_00089040 | XLOC_074047 | 15175981 | 15176192 | + | 1 | NA           | CUFF.1450 NA           | u       | TSS7867   | 4.293E-21 |
| chr7 | TCONS_00089041 | XLOC_074048 | 15185622 | 15185823 | + | 1 | NA           | CUFF.1450 NA           | u       | TSS7867   | 1.508E-30 |
| chr7 | TCONS_00083478 | XLOC_074053 | 15241222 | 15241548 | + | 1 | XBOS34       | CUFF.1132 OS07T04461(i | TSS7867 | 0         |           |
| chr7 | TCONS_00083479 | XLOC_074054 | 15241803 | 15242012 | + | 1 | XBOS34       | CUFF.1132 OS07T04461(i | TSS7867 | 8.914E-85 |           |
| chr7 | TCONS_00089047 | XLOC_074137 | 16229639 | 16229898 | + | 1 | OS07G0462200 | CUFF.1454 OS07T04622(x | TSS7876 | 2.303E-41 |           |
| chr7 | TCONS_00083593 | XLOC_074163 | 16601231 | 16601439 | + | 1 | OS07G0467200 | CUFF.1134 OS07T04672(i | TSS7879 | 0         |           |
| chr7 | TCONS_00089048 | XLOC_074166 | 16628684 | 16629137 | + | 1 | OS07G0467600 | CUFF.1455 OS07T04676(x | TSS7879 | 0.0005293 |           |
| chr7 | TCONS_00089050 | XLOC_074195 | 16942811 | 16943116 | + | 1 | NA           | CUFF.1456 NA           | u       | TSS7882   | 5.157E-08 |



|      |                |             |          |          |   |   |              |                        |   |         |           |
|------|----------------|-------------|----------|----------|---|---|--------------|------------------------|---|---------|-----------|
| chr7 | TCONS_00083651 | XLOC_074219 | 17197587 | 17197833 | + | 1 | NA           | CUFF.1135 NA           | u | TSS7885 | 1.167E-21 |
| chr7 | TCONS_00089052 | XLOC_074220 | 17206272 | 17206722 | + | 1 | OS07G0475900 | CUFF.1459 OS07T04759(i |   | TSS7885 | 4.53E-16  |
| chr7 | TCONS_00083655 | XLOC_074224 | 17243026 | 17243242 | + | 1 | OS07G0476200 | CUFF.1137 OS07T04762(i |   | TSS7885 | 3.19E-28  |
| chr7 | TCONS_00089055 | XLOC_074235 | 17307754 | 17308250 | + | 1 | NA           | CUFF.1457 NA           | u | TSS7886 | 6.048E-24 |
| chr7 | TCONS_00089056 | XLOC_074248 | 17421364 | 17421568 | + | 1 | NA           | CUFF.1458 NA           | u | TSS7888 | 0.005791  |
| chr7 | TCONS_00083679 | XLOC_074251 | 17423939 | 17424188 | + | 1 | NA           | CUFF.1137 NA           | u | TSS7888 | 2.074E-19 |
| chr7 | TCONS_00083682 | XLOC_074254 | 17426603 | 17426843 | + | 1 | OS07G0479600 | CUFF.1137 OS07T04796(x |   | TSS7888 | 0.075834  |
| chr7 | TCONS_00089057 | XLOC_074274 | 17691154 | 17691411 | + | 1 | OS07G0483500 | CUFF.1460 OS07T04835(i |   | TSS7890 | 3.45E-60  |
| chr7 | TCONS_00083710 | XLOC_074280 | 17747160 | 17747394 | + | 1 | OS07G0484300 | CUFF.1139 OS07T04843(i |   | TSS7891 | 2.056E-11 |
| chr7 | TCONS_00083719 | XLOC_074289 | 17797968 | 17798202 | + | 1 | OS07G0484800 | CUFF.1138 OS07T04848(i |   | TSS7892 | 1.839E-35 |
| chr7 | TCONS_00089059 | XLOC_074331 | 18257355 | 18257558 | + | 1 | NA           | CUFF.1461 NA           | u | TSS7896 | 1.326E-28 |
| chr7 | TCONS_00089061 | XLOC_074365 | 18504875 | 18505469 | + | 1 | NA           | CUFF.1461 NA           | u | TSS7900 | 1.842E-05 |
| chr7 | TCONS_00083799 | XLOC_074372 | 18534037 | 18534267 | + | 1 | OS07G0495200 | CUFF.1140 OS07T04952(i |   | TSS7900 | 5.553E-31 |
| chr7 | TCONS_00083803 | XLOC_074375 | 18581976 | 18582216 | + | 1 | OS07G0496000 | CUFF.1140 OS07T04960(i |   | TSS7901 | 8.551E-21 |
| chr7 | TCONS_00083814 | XLOC_074385 | 18634319 | 18634693 | + | 1 | NA           | CUFF.1141 NA           | u | TSS7902 | 2.527E-66 |
| chr7 | TCONS_00089064 | XLOC_074385 | 18634408 | 18634887 | + | 1 | NA           | CUFF.1462 NA           | u | TSS7902 | 1.349E-29 |
| chr7 | TCONS_00083853 | XLOC_074424 | 18925755 | 18925972 | + | 1 | OS07G0501900 | CUFF.1142 OS07T05019(i |   | TSS7906 | 2.681E-45 |
| chr7 | TCONS_00083854 | XLOC_074426 | 18956492 | 18956883 | + | 1 | OS07G0502200 | CUFF.1143 OS07T05022(x |   | TSS7906 | 0         |
| chr7 | TCONS_00083856 | XLOC_074429 | 18959888 | 18960864 | + | 1 | OS07G0502200 | CUFF.1143 OS07T05022(x |   | TSS7906 | 1.897E-86 |
| chr7 | TCONS_00083857 | XLOC_074430 | 18961123 | 18961588 | + | 1 | OS07G0502200 | CUFF.1144 OS07T05022(x |   | TSS7906 | 0         |
| chr7 | TCONS_00089070 | XLOC_074454 | 19164624 | 19164929 | + | 1 | OS07G0506000 | CUFF.1465 OS07T05060(i |   | TSS7909 | 1.027E-29 |
| chr7 | TCONS_00089074 | XLOC_074476 | 19378284 | 19378484 | + | 1 | NA           | CUFF.1466 NA           | u | TSS7911 | 1.508E-30 |
| chr7 | TCONS_00089075 | XLOC_074479 | 19383804 | 19384009 | + | 1 | NA           | CUFF.1466 NA           | u | TSS7911 | 1.168E-26 |
| chr7 | TCONS_00083937 | XLOC_074513 | 19667508 | 19667733 | + | 1 | OS07G0513100 | CUFF.1146 OS07T05131(x |   | TSS7915 | 1.357E-39 |
| chr7 | TCONS_00084004 | XLOC_074574 | 20153092 | 20153332 | + | 1 | NA           | CUFF.1147 NA           | u | TSS7921 | 7.189E-23 |
| chr7 | TCONS_00084005 | XLOC_074575 | 20154679 | 20155183 | + | 1 | NA           | CUFF.1148 NA           | u | TSS7921 | 7.764E-53 |
| chr7 | TCONS_00089082 | XLOC_074610 | 20391453 | 20391655 | + | 1 | NA           | CUFF.1472 NA           | u | TSS7925 | 1.527E-35 |
| chr7 | TCONS_00084078 | XLOC_074644 | 20734661 | 20734875 | + | 1 | GOS2         | CUFF.1152 OS07T05298(i |   | TSS7929 | 0.0001868 |
| chr7 | TCONS_00084162 | XLOC_074723 | 21443029 | 21443259 | + | 1 | OS07G0542600 | CUFF.1152 OS07T05426(i |   | TSS7937 | 1.33E-29  |
| chr7 | TCONS_00089093 | XLOC_074780 | 21903984 | 21904187 | + | 1 | OS07G0551600 | CUFF.1477 OS07T05516(x |   | TSS7943 | 2.869E-25 |
| chr7 | TCONS_00089095 | XLOC_074790 | 22010937 | 22011243 | + | 1 | NA           | CUFF.1480 NA           | u | TSS7944 | 7.959E-31 |
| chr7 | TCONS_00084268 | XLOC_074829 | 22272959 | 22273169 | + | 1 | OS07G0558000 | CUFF.1156 OS07T05580(i |   | TSS7949 | 1.137E-69 |
| chr7 | TCONS_00089105 | XLOC_074866 | 22574130 | 22574446 | + | 1 | NCRNA_43934  | CUFF.1485 NCRNA_439:x  |   | TSS7952 | 5.636E-58 |
| chr7 | TCONS_00089106 | XLOC_074880 | 22637817 | 22638045 | + | 1 | NA           | CUFF.1481 NA           | u | TSS7954 | 5.016E-18 |
| chr7 | TCONS_00084321 | XLOC_074890 | 22649873 | 22650123 | + | 1 | OS07G0564800 | CUFF.1157 OS07T05648(i |   | TSS7955 | 0         |

|      |                |             |          |          |   |   |              |                        |   |         |           |
|------|----------------|-------------|----------|----------|---|---|--------------|------------------------|---|---------|-----------|
| chr7 | TCONS_00084323 | XLOC_074892 | 22656883 | 22657087 | + | 1 | NA           | CUFF.1157 NA           | u | TSS7955 | 0         |
| chr7 | TCONS_00084324 | XLOC_074893 | 22658039 | 22658354 | + | 1 | OS07G0565100 | CUFF.1158 OS07T05651(x |   | TSS7955 | 2.139E-77 |
| chr7 | TCONS_00084336 | XLOC_074905 | 22719836 | 22720114 | + | 1 | NA           | CUFF.1157 NA           | u | TSS7956 | 1.121E-17 |
| chr7 | TCONS_00089120 | XLOC_074912 | 22773992 | 22774204 | + | 1 | OS07G0566800 | CUFF.1483 OS07T05668(x |   | TSS7957 | 0.075834  |
| chr7 | TCONS_00084353 | XLOC_074922 | 22857960 | 22858242 | + | 1 | NA           | CUFF.1158 NA           | u | TSS7958 | 1.007E-43 |
| chr7 | TCONS_00089122 | XLOC_074939 | 22967584 | 22967796 | + | 1 | OS07G0570300 | CUFF.1486 OS07T05703(i |   | TSS7960 | 1.508E-30 |
| chr7 | TCONS_00089125 | XLOC_074957 | 23069494 | 23069965 | + | 1 | NA           | CUFF.1484 NA           | u | TSS7962 | 3.414E-08 |
| chr7 | TCONS_00089127 | XLOC_074961 | 23089470 | 23089671 | + | 1 | OS07G0571900 | CUFF.1485 OS07T05719(i |   | TSS7962 | 3.249E-27 |
| chr7 | TCONS_00084453 | XLOC_075019 | 23432341 | 23432581 | + | 1 | NA           | CUFF.1161 NA           | u | TSS7968 | 3.192E-33 |
| chr7 | TCONS_00089130 | XLOC_075028 | 23513513 | 23513818 | + | 1 | OS07G0581000 | CUFF.1488 OS07T05810(i |   | TSS7969 | 1.387E-18 |
| chr7 | TCONS_00084461 | XLOC_075029 | 23514034 | 23514269 | + | 1 | OS07G0581000 | CUFF.1162 OS07T05810(i |   | TSS7969 | 1.842E-25 |
| chr7 | TCONS_00089131 | XLOC_075051 | 23657171 | 23657374 | + | 1 | OS07G0583700 | CUFF.1487 OS07T05837(i |   | TSS7972 | 6.268E-22 |
| chr7 | TCONS_00089133 | XLOC_075069 | 23789025 | 23789305 | + | 1 | OS07G0585600 | CUFF.1488 OS07T05856(i |   | TSS7974 | 2.529E-33 |
| chr7 | TCONS_00089134 | XLOC_075072 | 23801993 | 23802411 | + | 1 | OS07G0585800 | CUFF.1489 OS07T05858(x |   | TSS7974 | 5.016E-18 |
| chr7 | TCONS_00089136 | XLOC_075082 | 23908564 | 23908802 | + | 1 | OS07G0587400 | CUFF.1490 OS07T05874(i |   | TSS7975 | 2.529E-33 |
| chr7 | TCONS_00084563 | XLOC_075126 | 24273583 | 24273894 | + | 1 | NA           | CUFF.1164 NA           | u | TSS7980 | 0.0066932 |
| chr7 | TCONS_00089139 | XLOC_075127 | 24273977 | 24274290 | + | 1 | NA           | CUFF.1491 NA           | u | TSS7980 | 6.604E-06 |
| chr7 | TCONS_00089143 | XLOC_075130 | 24275688 | 24275949 | + | 1 | NA           | CUFF.1491 NA           | u | TSS7981 | 1.276E-05 |
| chr7 | TCONS_00089146 | XLOC_075156 | 24526851 | 24527366 | + | 1 | OS07G0601100 | CUFF.1492 OS07T06011(i |   | TSS7984 | 1.063E-19 |
| chr7 | TCONS_00089148 | XLOC_075166 | 24658135 | 24658491 | + | 1 | NCRNA_3627   | CUFF.1492 NCRNA_362' x |   | TSS7985 | 2.654E-11 |
| chr7 | TCONS_00089149 | XLOC_075182 | 24761620 | 24761939 | + | 1 | OS07G0604550 | CUFF.1493 OS07T06045(x |   | TSS7986 | 6.267E-22 |
| chr7 | TCONS_00089152 | XLOC_075228 | 25020402 | 25020654 | + | 1 | OS07G0608500 | CUFF.1496 OS07T06085(i |   | TSS7991 | 2.921E-17 |
| chr7 | TCONS_00084666 | XLOC_075229 | 25020692 | 25021027 | + | 1 | OS07G0608500 | CUFF.1168 OS07T06085(i |   | TSS7991 | 5.926E-30 |
| chr7 | TCONS_00084688 | XLOC_075251 | 25226695 | 25227705 | + | 1 | OS07G0613000 | CUFF.1169 OS07T06130(x |   | TSS7993 | 2.473E-39 |
| chr7 | TCONS_00089159 | XLOC_075277 | 25369300 | 25369530 | + | 1 | OS07G0615800 | CUFF.1496 OS07T06158(x |   | TSS7997 | 2.897E-27 |
| chr7 | TCONS_00084779 | XLOC_075332 | 25728334 | 25728773 | + | 1 | DAHPS2       | CUFF.1174 OS07T06222(x |   | TSS8003 | 5.568E-85 |
| chr7 | TCONS_00089167 | XLOC_075332 | 25728641 | 25728843 | + | 1 | DAHPS2       | CUFF.1502 OS07T06222(x |   | TSS8003 | 3.51E-47  |
| chr7 | TCONS_00084783 | XLOC_075337 | 25761896 | 25762221 | + | 1 | NA           | CUFF.1171 NA           | u | TSS8003 | 0         |
| chr7 | TCONS_00089171 | XLOC_075339 | 25765166 | 25765373 | + | 1 | NA           | CUFF.1499 NA           | u | TSS8004 | 2.217E-31 |
| chr7 | TCONS_00089172 | XLOC_075340 | 25777849 | 25778893 | + | 1 | OS07G0623100 | CUFF.1500 OS07T06231(x |   | TSS8004 | 6.831E-89 |
| chr7 | TCONS_00089173 | XLOC_075341 | 25779115 | 25779887 | + | 1 | NA           | CUFF.1500 NA           | u | TSS8004 | 0.0016332 |
| chr7 | TCONS_00089174 | XLOC_075342 | 25779940 | 25780539 | + | 1 | NA           | CUFF.1500 NA           | u | TSS8004 | 2.497E-05 |
| chr7 | TCONS_00089183 | XLOC_075387 | 26101951 | 26102279 | + | 1 | NA           | CUFF.1501 NA           | u | TSS8009 | 9.239E-09 |
| chr7 | TCONS_00084862 | XLOC_075417 | 26262428 | 26262719 | + | 1 | OS07G0633100 | CUFF.1174 OS07T06331(i |   | TSS8012 | 2.962E-08 |
| chr7 | TCONS_00089188 | XLOC_075423 | 26295062 | 26295263 | + | 1 | OS07G0633500 | CUFF.1503 OS07T06335(i |   | TSS8013 | 2.943E-20 |

|      |                |             |          |          |   |   |              |                         |         |                   |
|------|----------------|-------------|----------|----------|---|---|--------------|-------------------------|---------|-------------------|
| chr7 | TCONS_00089191 | XLOC_075448 | 26484578 | 26484871 | + | 1 | OS07G0637300 | CUFF.1505 OS07T063730(i | TSS8016 | 1.027E-29         |
| chr7 | TCONS_00089194 | XLOC_075453 | 26531775 | 26532145 | + | 1 | NA           | CUFF.1504 NA            | u       | TSS8016 2.137E-10 |
| chr7 | TCONS_00089196 | XLOC_075457 | 26547576 | 26547820 | + | 1 | NA           | CUFF.1505 NA            | u       | TSS8016 2.891E-35 |
| chr7 | TCONS_00089197 | XLOC_075479 | 26688227 | 26688485 | + | 1 | NA           | CUFF.1505 NA            | u       | TSS8019 9.158E-23 |
| chr7 | TCONS_00089199 | XLOC_075509 | 26890991 | 26891731 | + | 1 | OS07G0645100 | CUFF.1508 OS07T064510(x | TSS8022 | 0.0025663         |
| chr7 | TCONS_00084952 | XLOC_075510 | 26891742 | 26892261 | + | 1 | NA           | CUFF.1177 NA            | u       | TSS8022 5.616E-57 |
| chr7 | TCONS_00089200 | XLOC_075510 | 26891939 | 26892469 | + | 1 | NA           | CUFF.1506 NA            | u       | TSS8022 0.003985  |
| chr7 | TCONS_00089201 | XLOC_075512 | 26893268 | 26893818 | + | 1 | NA           | CUFF.1507 NA            | u       | TSS8022 5.665E-17 |
| chr7 | TCONS_00089202 | XLOC_075513 | 26893960 | 26894272 | + | 1 | NA           | CUFF.1506 NA            | u       | TSS8022 1.084E-15 |
| chr7 | TCONS_00089203 | XLOC_075515 | 26895122 | 26895688 | + | 1 | NA           | CUFF.1507 NA            | u       | TSS8023 2.243E-07 |
| chr7 | TCONS_00089207 | XLOC_075519 | 26897333 | 26897572 | + | 1 | NA           | CUFF.1507 NA            | u       | TSS8023 7.187E-39 |
| chr7 | TCONS_00084962 | XLOC_075521 | 26898749 | 26898993 | + | 1 | NA           | CUFF.1177 NA            | u       | TSS8023 2.147E-33 |
| chr7 | TCONS_00089210 | XLOC_075522 | 26899162 | 26900000 | + | 1 | NA           | CUFF.1508 NA            | u       | TSS8024 1.165E-31 |
| chr7 | TCONS_00089211 | XLOC_075523 | 26900082 | 26900563 | + | 1 | NA           | CUFF.1508 NA            | u       | TSS8024 1.183E-21 |
| chr7 | TCONS_00089212 | XLOC_075524 | 26901872 | 26902939 | + | 1 | NA           | CUFF.1509 NA            | u       | TSS8024 4.517E-08 |
| chr7 | TCONS_00089214 | XLOC_075537 | 26964522 | 26965112 | + | 1 | OS07G0646100 | CUFF.1509 OS07T064610(i | TSS8025 | 1.509E-07         |
| chr7 | TCONS_00089216 | XLOC_075552 | 27044837 | 27045039 | + | 1 | OS07G0647600 | CUFF.1510 OS07T064760(x | TSS8027 | 1.339E-23         |
| chr7 | TCONS_00085070 | XLOC_075621 | 27591071 | 27591275 | + | 1 | OS07G0656100 | CUFF.1181 OS07T065610(x | TSS8034 | 0                 |
| chr7 | TCONS_00089220 | XLOC_075644 | 27774833 | 27775125 | + | 1 | NA           | CUFF.1512 NA            | u       | TSS8037 6.821E-10 |
| chr7 | TCONS_00085105 | XLOC_075657 | 27836467 | 27836786 | + | 1 | NA           | CUFF.1182 NA            | u       | TSS8038 1.82E-14  |
| chr7 | TCONS_00085106 | XLOC_075658 | 27837038 | 27837445 | + | 1 | NA           | CUFF.1182 NA            | u       | TSS8038 2.097E-74 |
| chr7 | TCONS_00085107 | XLOC_075659 | 27837623 | 27837965 | + | 1 | NA           | CUFF.1182 NA            | u       | TSS8038 5.156E-70 |
| chr7 | TCONS_00085108 | XLOC_075660 | 27838456 | 27839081 | + | 1 | NA           | CUFF.1182 NA            | u       | TSS8039 3.501E-85 |
| chr7 | TCONS_00089228 | XLOC_075660 | 27838329 | 27838675 | + | 1 | NA           | CUFF.1513 NA            | u       | TSS8039 5.551E-44 |
| chr7 | TCONS_00089231 | XLOC_075666 | 27875470 | 27875672 | + | 1 | OS07G0661100 | CUFF.1514 OS07T066110(i | TSS8040 | 2.869E-25         |
| chr7 | TCONS_00085119 | XLOC_075673 | 27891005 | 27891254 | + | 1 | OS07G0661400 | CUFF.1183 OS07T066140(x | TSS8040 | 9.302E-56         |
| chr7 | TCONS_00085131 | XLOC_075686 | 27920453 | 27920657 | + | 1 | OS07G0661600 | CUFF.1184 OS07T066160(i | TSS8042 | 0                 |
| chr7 | TCONS_00089247 | XLOC_075717 | 28077187 | 28077409 | + | 1 | SODCC2       | CUFF.1517 OS07T066520(i | TSS8045 | 2.139E-49         |
| chr7 | TCONS_00089248 | XLOC_075731 | 28191107 | 28191357 | + | 1 | OS07G0667400 | CUFF.1517 OS07T066740(x | TSS8047 | 3.311E-37         |
| chr7 | TCONS_00089249 | XLOC_075738 | 28219686 | 28219893 | + | 1 | OS07G0668200 | CUFF.1518 OS07T066820(x | TSS8047 | 1.033E-24         |
| chr7 | TCONS_00085199 | XLOC_075756 | 28317099 | 28317319 | + | 1 | OS07G0669700 | CUFF.1187 OS07T066970(i | TSS8049 | 0                 |
| chr7 | TCONS_00089251 | XLOC_075780 | 28455133 | 28455728 | + | 1 | OS07G0673200 | CUFF.1519 OS07T067320(i | TSS8052 | 1.739E-22         |
| chr7 | TCONS_00085249 | XLOC_075804 | 28637751 | 28637973 | + | 1 | OS07G0676200 | CUFF.1188 OS07T067620(i | TSS8054 | 2.395E-42         |
| chr7 | TCONS_00089256 | XLOC_075822 | 28740559 | 28740961 | + | 1 | NA           | CUFF.1521 NA            | u       | TSS8056 4.53E-16  |
| chr7 | TCONS_00085277 | XLOC_075831 | 28822545 | 28822772 | + | 1 | OS07G0680300 | CUFF.1188 OS07T068030(i | TSS8057 | 4.606E-19         |

|      |                |             |          |          |   |   |              |                        |         |           |
|------|----------------|-------------|----------|----------|---|---|--------------|------------------------|---------|-----------|
| chr7 | TCONS_00085338 | XLOC_075895 | 29197382 | 29197878 | + | 1 | OS07G0687100 | CUFF.1191 OS07T06871(x | TSS8064 | 0         |
| chr7 | TCONS_00085355 | XLOC_075915 | 29349361 | 29349568 | + | 1 | NA           | CUFF.1191 NA u         | TSS8066 | 0         |
| chr7 | TCONS_00085372 | XLOC_075927 | 29439116 | 29439318 | + | 1 | TBP2         | CUFF.1193 OS07T06918(x | TSS8068 | 1.484E-54 |
| chr7 | TCONS_00085403 | XLOC_075954 | 29586374 | 29586608 | + | 1 | NA           | CUFF.1193 NA u         | TSS8071 | 1.561E-32 |
| chr7 | TCONS_00089276 | XLOC_075963 | 29670699 | 29670921 | + | 1 | NA           | CUFF.1527 NA u         | TSS8072 | 6.57E-17  |
| chr7 | TCONS_00085413 | XLOC_075965 | 29673285 | 29673490 | + | 1 | NA           | CUFF.1193 NA u         | TSS8072 | 2.235E-14 |
| chr7 | TCONS_00089282 | XLOC_075973 | 29677586 | 29678010 | + | 1 | NA           | CUFF.1528 NA u         | TSS8073 | 1.809E-17 |
| chr7 | TCONS_00085419 | XLOC_075974 | 29678113 | 29678465 | + | 1 | NA           | CUFF.1194 NA u         | TSS8073 | 1.877E-12 |
| chr7 | TCONS_00089284 | XLOC_075981 | 37533    | 37851    | - | 1 | OS07G0100500 | CUFF.1389 OS07T01005(i | TSS8074 | 9.526E-05 |
| chr7 | TCONS_00085448 | XLOC_076007 | 291782   | 292008   | - | 1 | OS07G0105000 | CUFF.1089 OS07T01050(x | TSS8076 | 1.441E-28 |
| chr7 | TCONS_00085485 | XLOC_076047 | 574189   | 574551   | - | 1 | NA           | CUFF.1090 NA u         | TSS8080 | 0.036535  |
| chr7 | TCONS_00089296 | XLOC_076048 | 574676   | 575105   | - | 1 | NA           | CUFF.1392 NA u         | TSS8081 | 4.476E-45 |
| chr7 | TCONS_00085487 | XLOC_076050 | 575823   | 576050   | - | 1 | OS07G0110400 | CUFF.1090 OS07T01104(x | TSS8081 | 1.228E-30 |
| chr7 | TCONS_00085514 | XLOC_076077 | 798062   | 798385   | - | 1 | OS07G0114300 | CUFF.1092 OS07T01143(i | TSS8084 | 7.532E-62 |
| chr7 | TCONS_00085563 | XLOC_076125 | 1091750  | 1091969  | - | 1 | NA           | CUFF.1092 NA u         | TSS8089 | 1.2E-46   |
| chr7 | TCONS_00089302 | XLOC_076134 | 1134068  | 1134616  | - | 1 | NA           | CUFF.1394 NA u         | TSS8090 | 1.859E-10 |
| chr7 | TCONS_00085607 | XLOC_076169 | 1449516  | 1449878  | - | 1 | NA           | CUFF.1094 NA u         | TSS8093 | 1.818E-15 |
| chr7 | TCONS_00085660 | XLOC_076218 | 1844126  | 1844327  | - | 1 | OS07G0134500 | CUFF.1095 OS07T01345(x | TSS8099 | 3.123E-83 |
| chr7 | TCONS_00089315 | XLOC_076306 | 2505039  | 2505490  | - | 1 | NA           | CUFF.1400 NA u         | TSS8108 | 1.388E-11 |
| chr7 | TCONS_00089316 | XLOC_076306 | 2505567  | 2505959  | - | 1 | NA           | CUFF.1401 NA u         | TSS8108 | 3.839E-19 |
| chr7 | TCONS_00089318 | XLOC_076308 | 2507148  | 2507576  | - | 1 | NA           | CUFF.1401 NA u         | TSS8109 | 7.535E-19 |
| chr7 | TCONS_00089321 | XLOC_076315 | 2539698  | 2540044  | - | 1 | NA           | CUFF.1401 NA u         | TSS8109 | 0.024257  |
| chr7 | TCONS_00085797 | XLOC_076346 | 2797257  | 2797606  | - | 1 | OS07G0152800 | CUFF.1099 OS07T01528(x | TSS8113 | 1.254E-38 |
| chr7 | TCONS_00089326 | XLOC_076395 | 3200530  | 3200741  | - | 1 | OS07G0159800 | CUFF.1403 OS07T01598(i | TSS8118 | 9.526E-05 |
| chr7 | TCONS_00085849 | XLOC_076398 | 3243657  | 3243878  | - | 1 | OS07G0160300 | CUFF.1100 OS07T01603(x | TSS8118 | 1.291E-45 |
| chr7 | TCONS_00089332 | XLOC_076431 | 3414754  | 3415092  | - | 1 | NA           | CUFF.1404 NA u         | TSS8122 | 7.056E-24 |
| chr7 | TCONS_00085889 | XLOC_076443 | 3449559  | 3449763  | - | 1 | OS07G0164300 | CUFF.1102 OS07T01643(i | TSS8123 | 0         |
| chr7 | TCONS_00089336 | XLOC_076463 | 3601512  | 3601764  | - | 1 | NA           | CUFF.1405 NA u         | TSS8125 | 2.542E-23 |
| chr7 | TCONS_00085936 | XLOC_076492 | 3844576  | 3844968  | - | 1 | NA           | CUFF.1102 NA u         | TSS8128 | 2.007E-36 |
| chr7 | TCONS_00085943 | XLOC_076501 | 3874221  | 3874449  | - | 1 | OS07G0173501 | CUFF.1105 OS07T01735(i | TSS8129 | 0.0003223 |
| chr7 | TCONS_00089343 | XLOC_076503 | 3911130  | 3911389  | - | 1 | NA           | CUFF.1409 NA u         | TSS8129 | 7.209E-24 |
| chr7 | TCONS_00089348 | XLOC_076538 | 4181335  | 4181612  | - | 1 | OS07G0179200 | CUFF.1410 OS07T01792(x | TSS8133 | 7.056E-24 |
| chr7 | TCONS_00089351 | XLOC_076556 | 4340902  | 4341107  | - | 1 | OS07G0182200 | CUFF.1412 OS07T01822(i | TSS8135 | 2.542E-23 |
| chr7 | TCONS_00086008 | XLOC_076570 | 4469476  | 4469742  | - | 1 | NA           | CUFF.1105 NA u         | TSS8136 | 0         |
| chr7 | TCONS_00089354 | XLOC_076572 | 4484808  | 4485190  | - | 1 | NA           | CUFF.1412 NA u         | TSS8136 | 5.443E-25 |

|      |                |             |          |          |   |   |              |                        |   |         |           |
|------|----------------|-------------|----------|----------|---|---|--------------|------------------------|---|---------|-----------|
| chr7 | TCONS_00089359 | XLOC_076594 | 4653821  | 4654184  | - | 1 | NA           | CUFF.1413 NA           | u | TSS8139 | 7.959E-31 |
| chr7 | TCONS_00089360 | XLOC_076603 | 4738650  | 4738882  | - | 1 | OS07G0188800 | CUFF.1415 OS07T01888(i |   | TSS8140 | 1.168E-26 |
| chr7 | TCONS_00089364 | XLOC_076627 | 4990715  | 4990956  | - | 1 | NA           | CUFF.1415 NA           | u | TSS8142 | 2.503E-19 |
| chr7 | TCONS_00089365 | XLOC_076630 | 4999498  | 4999699  | - | 1 | OS07G0192550 | CUFF.1415 OS07T01925(i |   | TSS8143 | 7.048E-34 |
| chr7 | TCONS_00089367 | XLOC_076660 | 5248776  | 5248988  | - | 1 | NA           | CUFF.1416 NA           | u | TSS8146 | 1.739E-22 |
| chr7 | TCONS_00086118 | XLOC_076684 | 5453159  | 5453388  | - | 1 | OS07G0201100 | CUFF.1108 OS07T02011(i |   | TSS8148 | 1.561E-32 |
| chr7 | TCONS_00089371 | XLOC_076693 | 5542442  | 5542650  | - | 1 | NA           | CUFF.1417 NA           | u | TSS8149 | 2.216E-26 |
| chr7 | TCONS_00089375 | XLOC_076712 | 5655505  | 5655821  | - | 1 | OS07G0205000 | CUFF.1419 OS07T02050(i |   | TSS8151 | 1.351E-09 |
| chr7 | TCONS_00086145 | XLOC_076715 | 5663496  | 5663722  | - | 1 | OS07G0205200 | CUFF.1109 OS07T02052(x |   | TSS8151 | 1.688E-31 |
| chr7 | TCONS_00089377 | XLOC_076743 | 5877689  | 5878042  | - | 1 | OS07G0208801 | CUFF.1419 OS07T02088(i |   | TSS8154 | 7.056E-24 |
| chr7 | TCONS_00089378 | XLOC_076747 | 5934737  | 5934939  | - | 1 | OS07G0209401 | CUFF.1420 OS07T02094(x |   | TSS8155 | 2.859E-30 |
| chr7 | TCONS_00089379 | XLOC_076756 | 6036629  | 6036853  | - | 1 | OS07G0211101 | CUFF.1420 OS07T02111(i |   | TSS8156 | 0.01177   |
| chr7 | TCONS_00086188 | XLOC_076757 | 6037699  | 6038020  | - | 1 | NA           | CUFF.1110 NA           | u | TSS8156 | 4.455E-39 |
| chr7 | TCONS_00086190 | XLOC_076759 | 6039359  | 6039692  | - | 1 | NA           | CUFF.1109 NA           | u | TSS8156 | 4.505E-15 |
| chr7 | TCONS_00089383 | XLOC_076763 | 6052034  | 6052319  | - | 1 | NA           | CUFF.1420 NA           | u | TSS8156 | 1.742E-55 |
| chr7 | TCONS_00089386 | XLOC_076813 | 6497834  | 6498280  | - | 1 | OS07G0217600 | CUFF.1424 OS07T02176(i |   | TSS8162 | 4.325E-10 |
| chr7 | TCONS_00086298 | XLOC_076867 | 6959261  | 6959510  | - | 1 | NA           | CUFF.1112 NA           | u | TSS8167 | 6.88E-11  |
| chr7 | TCONS_00086336 | XLOC_076897 | 7238969  | 7239171  | - | 1 | NA           | CUFF.1113 NA           | u | TSS8170 | 0         |
| chr7 | TCONS_00086343 | XLOC_076905 | 7317533  | 7318010  | - | 1 | OS07G0231700 | CUFF.1425 OS07T02317(x |   | TSS8171 | 0.53323   |
| chr7 | TCONS_00086371 | XLOC_076932 | 7546661  | 7546906  | - | 1 | OS07G0235800 | CUFF.1114 OS07T02358(x |   | TSS8174 | 4.505E-15 |
| chr7 | TCONS_00089396 | XLOC_076940 | 7622014  | 7622368  | - | 1 | OS07G0236800 | CUFF.1426 OS07T02368(i |   | TSS8175 | 4.53E-16  |
| chr7 | TCONS_00086609 | XLOC_077171 | 10179128 | 10179417 | - | 1 | NCRNA_44111  | CUFF.1118 NCRNA_441 x  |   | TSS8199 | 4.955E-06 |
| chr7 | TCONS_00086657 | XLOC_077218 | 10638259 | 10638478 | - | 1 | 4CLL7        | CUFF.1119 OS07T02802(x |   | TSS8204 | 7.06E-28  |
| chr7 | TCONS_00086677 | XLOC_077239 | 10752973 | 10753202 | - | 1 | OS07G0282300 | CUFF.1120 OS07T02823(i |   | TSS8206 | 3.192E-33 |
| chr7 | TCONS_00086710 | XLOC_077270 | 11064501 | 11064706 | - | 1 | NA           | CUFF.1120 NA           | u | TSS8209 | 1.073E-53 |
| chr7 | TCONS_00089421 | XLOC_077293 | 11360859 | 11361060 | - | 1 | OS07G0292800 | CUFF.1435 OS07T02928(i |   | TSS8211 | 6.268E-22 |
| chr7 | TCONS_00089423 | XLOC_077299 | 11480370 | 11480788 | - | 1 | NA           | CUFF.1435 NA           | u | TSS8212 | 1.643E-15 |
| chr7 | TCONS_00089424 | XLOC_077300 | 11480970 | 11481275 | - | 1 | OS07G0294600 | CUFF.1435 OS07T02946(x |   | TSS8212 | 8.155E-21 |
| chr7 | TCONS_00089426 | XLOC_077304 | 11497903 | 11498186 | - | 1 | OS07G0294800 | CUFF.1436 OS07T02948(i |   | TSS8212 | 2.953E-65 |
| chr7 | TCONS_00089427 | XLOC_077310 | 11580508 | 11581366 | - | 1 | OS07G0296000 | CUFF.1438 OS07T02960(i |   | TSS8213 | 2.38E-16  |
| chr7 | TCONS_00089428 | XLOC_077311 | 11581586 | 11581872 | - | 1 | OS07G0296000 | CUFF.1439 OS07T02960(i |   | TSS8213 | 0.030927  |
| chr7 | TCONS_00086748 | XLOC_077313 | 11587241 | 11587462 | - | 1 | NA           | CUFF.1121 NA           | u | TSS8213 | 1.842E-25 |
| chr7 | TCONS_00086758 | XLOC_077323 | 11678444 | 11678678 | - | 1 | NCRNA_5875   | CUFF.1121 NCRNA_587:x  |   | TSS8214 | 1.561E-32 |
| chr7 | TCONS_00089430 | XLOC_077329 | 11727721 | 11728065 | - | 1 | NA           | CUFF.1436 NA           | u | TSS8215 | 2.248E-36 |
| chr7 | TCONS_00086764 | XLOC_077330 | 11728083 | 11728497 | - | 1 | NA           | CUFF.1121 NA           | u | TSS8215 | 0.20934   |

|      |                |             |          |          |   |   |              |           |               |   |         |           |
|------|----------------|-------------|----------|----------|---|---|--------------|-----------|---------------|---|---------|-----------|
| chr7 | TCONS_00086766 | XLOC_077332 | 11730176 | 11730408 | - | 1 | NA           | CUFF.1121 | NA            | u | TSS8215 | 3.533E-22 |
| chr7 | TCONS_00089432 | XLOC_077335 | 11780496 | 11780728 | - | 1 | OS07G0299600 | CUFF.1436 | OS07T02996(i  |   | TSS8215 | 1.339E-23 |
| chr7 | TCONS_00086768 | XLOC_077336 | 11782997 | 11783229 | - | 1 | NCRNA_40804  | CUFF.1122 | NCRNA_40804(x |   | TSS8216 | 1.463E-38 |
| chr7 | TCONS_00086808 | XLOC_077375 | 12425565 | 12425855 | - | 1 | OS07G0405100 | CUFF.1122 | OS07T04051(x  |   | TSS8220 | 4.391E-34 |
| chr7 | TCONS_00086845 | XLOC_077402 | 12751134 | 12751377 | - | 1 | OS07G0409100 | CUFF.1123 | OS07T04091(i  |   | TSS8223 | 3.764E-36 |
| chr7 | TCONS_00086846 | XLOC_077403 | 12756226 | 12756478 | - | 1 | OS07G0409100 | CUFF.1123 | OS07T04091(i  |   | TSS8223 | 0         |
| chr7 | TCONS_00086904 | XLOC_077460 | 13267755 | 13268098 | - | 1 | NA           | CUFF.1127 | NA            | u | TSS8229 | 2.989E-57 |
| chr7 | TCONS_00089442 | XLOC_077461 | 13268750 | 13269068 | - | 1 | NA           | CUFF.1442 | NA            | u | TSS8229 | 2.869E-25 |
| chr7 | TCONS_00089444 | XLOC_077469 | 13314071 | 13314339 | - | 1 | OS07G0418200 | CUFF.1445 | OS07T04182(i  |   | TSS8230 | 1.361E-38 |
| chr7 | TCONS_00086948 | XLOC_077502 | 13600948 | 13601163 | - | 1 | NA           | CUFF.1128 | NA            | u | TSS8233 | 8.914E-85 |
| chr7 | TCONS_00089447 | XLOC_077502 | 13600844 | 13601089 | - | 1 | NA           | CUFF.1444 | NA            | u | TSS8233 | 8.522E-20 |
| chr7 | TCONS_00086949 | XLOC_077503 | 13601378 | 13601723 | - | 1 | NA           | CUFF.1128 | NA            | u | TSS8233 | 1.167E-21 |
| chr7 | TCONS_00089450 | XLOC_077541 | 14308158 | 14308368 | - | 1 | NA           | CUFF.1446 | NA            | u | TSS8237 | 7.393E-44 |
| chr7 | TCONS_00089451 | XLOC_077542 | 14308445 | 14308929 | - | 1 | NA           | CUFF.1446 | NA            | u | TSS8237 | 2.223E-67 |
| chr7 | TCONS_00089452 | XLOC_077543 | 14309159 | 14309386 | - | 1 | NA           | CUFF.1446 | NA            | u | TSS8237 | 1.02E-52  |
| chr7 | TCONS_00089453 | XLOC_077573 | 14611419 | 14611620 | - | 1 | OS07G0436700 | CUFF.1448 | OS07T04367(x  |   | TSS8240 | 1.512E-25 |
| chr7 | TCONS_00087035 | XLOC_077589 | 14729490 | 14729914 | - | 1 | NA           | CUFF.1130 | NA            | u | TSS8242 | 1.441E-28 |
| chr7 | TCONS_00089459 | XLOC_077593 | 14744374 | 14744661 | - | 1 | OS07G0438700 | CUFF.1448 | OS07T04387(x  |   | TSS8243 | 2.139E-49 |
| chr7 | TCONS_00087058 | XLOC_077618 | 14988711 | 14988966 | - | 1 | OS07G0442900 | CUFF.1130 | OS07T04429(x  |   | TSS8245 | 0         |
| chr7 | TCONS_00087085 | XLOC_077642 | 15407253 | 15407628 | - | 1 | PIP2-1       | CUFF.1133 | OS07T04488(i  |   | TSS8248 | 1.274E-20 |
| chr7 | TCONS_00087148 | XLOC_077707 | 16003786 | 16004137 | - | 1 | NA           | CUFF.1132 | NA            | u | TSS8254 | 1.053E-15 |
| chr7 | TCONS_00087149 | XLOC_077708 | 16004393 | 16004598 | - | 1 | NA           | CUFF.1132 | NA            | u | TSS8254 | 0         |
| chr7 | TCONS_00089477 | XLOC_077758 | 16520697 | 16520922 | - | 1 | OS07G0466200 | CUFF.1456 | OS07T04662(i  |   | TSS8260 | 3.129E-15 |
| chr7 | TCONS_00089478 | XLOC_077773 | 16653180 | 16653382 | - | 1 | OS07G0467800 | CUFF.1455 | OS07T04678(i  |   | TSS8261 | 7.656E-49 |
| chr7 | TCONS_00089484 | XLOC_077797 | 16967446 | 16967663 | - | 1 | OS07G0472400 | CUFF.1456 | OS07T04724(i  |   | TSS8264 | 1.508E-53 |
| chr7 | TCONS_00089486 | XLOC_077807 | 17110734 | 17111052 | - | 1 | NA           | CUFF.1457 | NA            | u | TSS8265 | 2.303E-41 |
| chr7 | TCONS_00089487 | XLOC_077833 | 17401628 | 17401975 | - | 1 | OS07G0479100 | CUFF.1458 | OS07T04791(i  |   | TSS8268 | 2.38E-16  |
| chr7 | TCONS_00087302 | XLOC_077863 | 17772963 | 17773171 | - | 1 | NA           | CUFF.1138 | NA            | u | TSS8271 | 1.484E-54 |
| chr7 | TCONS_00087358 | XLOC_077920 | 18317779 | 18318066 | - | 1 | NA           | CUFF.1139 | NA            | u | TSS8277 | 6.49E-50  |
| chr7 | TCONS_00087359 | XLOC_077921 | 18319005 | 18319215 | - | 1 | NA           | CUFF.1139 | NA            | u | TSS8277 | 5.588E-26 |
| chr7 | TCONS_00087378 | XLOC_077940 | 18456392 | 18456606 | - | 1 | NA           | CUFF.1139 | NA            | u | TSS8279 | 2.943E-29 |
| chr7 | TCONS_00087412 | XLOC_077972 | 18652159 | 18652399 | - | 1 | PNG1         | CUFF.1142 | OS07T04974(i  |   | TSS8282 | 0         |
| chr7 | TCONS_00087429 | XLOC_077988 | 18815520 | 18816084 | - | 1 | NA           | CUFF.1141 | NA            | u | TSS8284 | 0.12416   |
| chr7 | TCONS_00089503 | XLOC_077989 | 18816910 | 18817112 | - | 1 | NA           | CUFF.1463 | NA            | u | TSS8284 | 2.943E-20 |
| chr7 | TCONS_00089504 | XLOC_077990 | 18817504 | 18817728 | - | 1 | NA           | CUFF.1463 | NA            | u | TSS8284 | 1.713E-27 |

|      |                |             |          |          |   |   |              |                        |         |           |           |
|------|----------------|-------------|----------|----------|---|---|--------------|------------------------|---------|-----------|-----------|
| chr7 | TCONS_00087473 | XLOC_078029 | 19272817 | 19273058 | - | 1 | OS07G0507500 | CUFF.1143 OS07T05075(i | TSS8288 | 2.306E-10 |           |
| chr7 | TCONS_00089506 | XLOC_078032 | 19282244 | 19282468 | - | 1 | NCRNA_1016   | CUFF.1466 NCRNA_101(x  | TSS8288 | 5.681E-10 |           |
| chr7 | TCONS_00087483 | XLOC_078040 | 19362388 | 19362589 | - | 1 | NA           | CUFF.1143 NA           | u       | TSS8289   | 3.407E-07 |
| chr7 | TCONS_00089510 | XLOC_078073 | 19590589 | 19591075 | - | 1 | NA           | CUFF.1467 NA           | u       | TSS8292   | 3.301E-22 |
| chr7 | TCONS_00089512 | XLOC_078075 | 19592605 | 19593437 | - | 1 | OS07G0511900 | CUFF.1467 OS07T05119(x | TSS8293 | 0.73083   |           |
| chr7 | TCONS_00089515 | XLOC_078098 | 19840415 | 19840744 | - | 1 | OS07G0515900 | CUFF.1468 OS07T05159(x | TSS8295 | 1.168E-26 |           |
| chr7 | TCONS_00089517 | XLOC_078105 | 19899747 | 19899997 | - | 1 | NA           | CUFF.1468 NA           | u       | TSS8296   | 4.409E-59 |
| chr7 | TCONS_00087556 | XLOC_078110 | 19921921 | 19922140 | - | 1 | OS07G0516900 | CUFF.1147 OS07T05169(x | TSS8296 | 9.688E-29 |           |
| chr7 | TCONS_00089524 | XLOC_078136 | 20103231 | 20103452 | - | 1 | NA           | CUFF.1469 NA           | u       | TSS8299   | 2.542E-23 |
| chr7 | TCONS_00089526 | XLOC_078138 | 20106005 | 20106323 | - | 1 | NA           | CUFF.1469 NA           | u       | TSS8299   | 4.824E-23 |
| chr7 | TCONS_00087594 | XLOC_078150 | 20205317 | 20206049 | - | 1 | NA           | CUFF.1148 NA           | u       | TSS8301   | 1.671E-23 |
| chr7 | TCONS_00087595 | XLOC_078151 | 20206137 | 20206673 | - | 1 | NA           | CUFF.1148 NA           | u       | TSS8301   | 1.422E-28 |
| chr7 | TCONS_00089530 | XLOC_078151 | 20206418 | 20206841 | - | 1 | NA           | CUFF.1470 NA           | u       | TSS8301   | 4.823E-23 |
| chr7 | TCONS_00087596 | XLOC_078152 | 20208184 | 20208692 | - | 1 | NA           | CUFF.1148 NA           | u       | TSS8302   | 1.084E-42 |
| chr7 | TCONS_00087597 | XLOC_078153 | 20209421 | 20209864 | - | 1 | NA           | CUFF.1148 NA           | u       | TSS8302   | 1.596E-37 |
| chr7 | TCONS_00089533 | XLOC_078154 | 20210402 | 20210635 | - | 1 | NA           | CUFF.1470 NA           | u       | TSS8302   | 6.048E-24 |
| chr7 | TCONS_00087601 | XLOC_078158 | 20213779 | 20214347 | - | 1 | PDR5         | CUFF.1150 OS07T05225(x | TSS8302 | 2.382E-88 |           |
| chr7 | TCONS_00089537 | XLOC_078161 | 20249492 | 20249838 | - | 1 | NA           | CUFF.1471 NA           | u       | TSS8303   | 2.216E-26 |
| chr7 | TCONS_00089539 | XLOC_078163 | 20252779 | 20253012 | - | 1 | OS07G0522900 | CUFF.1471 OS07T05229(x | TSS8303 | 0.13872   |           |
| chr7 | TCONS_00089543 | XLOC_078220 | 20765607 | 20766010 | - | 1 | PDRP1        | CUFF.1474 OS07T05306(i | TSS8309 | 6.267E-22 |           |
| chr7 | TCONS_00089544 | XLOC_078221 | 20768023 | 20768380 | - | 1 | PDRP1        | CUFF.1474 OS07T05306(i | TSS8309 | 5.016E-18 |           |
| chr7 | TCONS_00087664 | XLOC_078224 | 20770058 | 20770396 | - | 1 | OS07G0530700 | CUFF.1151 OS07T05307(i | TSS8309 | 1.696E-26 |           |
| chr7 | TCONS_00087699 | XLOC_078256 | 21063212 | 21063478 | - | 1 | OS07G0536300 | CUFF.1151 OS07T05363(i | TSS8312 | 5.855E-14 |           |
| chr7 | TCONS_00089551 | XLOC_078269 | 21132318 | 21132643 | - | 1 | OS07G0537400 | CUFF.1474 OS07T05374(x | TSS8314 | 5.076E-11 |           |
| chr7 | TCONS_00089552 | XLOC_078278 | 21178557 | 21178779 | - | 1 | NA           | CUFF.1475 NA           | u       | TSS8315   | 9.712E-11 |
| chr7 | TCONS_00089554 | XLOC_078329 | 21616400 | 21616959 | - | 1 | CIGR1        | CUFF.1476 OS07T05458(i | TSS8320 | 4.963E-29 |           |
| chr7 | TCONS_00089556 | XLOC_078351 | 21795970 | 21796172 | - | 1 | NA           | CUFF.1476 NA           | u       | TSS8322   | 1.264E-18 |
| chr7 | TCONS_00087794 | XLOC_078356 | 21821503 | 21821749 | - | 1 | OS07G0549700 | CUFF.1154 OS07T05497(i | TSS8323 | 2.235E-14 |           |
| chr7 | TCONS_00089565 | XLOC_078445 | 22564450 | 22564686 | - | 1 | NA           | CUFF.1480 NA           | u       | TSS8332   | 8.833E-51 |
| chr7 | TCONS_00087926 | XLOC_078480 | 22783453 | 22783730 | - | 1 | OS07G0567000 | CUFF.1158 OS07T05670(x | TSS8336 | 0         |           |
| chr7 | TCONS_00089567 | XLOC_078513 | 23004174 | 23004462 | - | 1 | OS07G0570700 | CUFF.1484 OS07T05707(i | TSS8339 | 0.024257  |           |
| chr7 | TCONS_00089571 | XLOC_078543 | 23244274 | 23244674 | - | 1 | OS07G0574800 | CUFF.1486 OS07T05748(i | TSS8343 | 7.297E-19 |           |
| chr7 | TCONS_00089573 | XLOC_078556 | 23301738 | 23302117 | - | 1 | OS07G0575900 | CUFF.1487 OS07T05759(x | TSS8344 | 2.469E-51 |           |
| chr7 | TCONS_00089577 | XLOC_078591 | 23525862 | 23526068 | - | 1 | NA           | CUFF.1487 NA           | u       | TSS8348   | 5.183E-48 |
| chr7 | TCONS_00088054 | XLOC_078606 | 23620116 | 23620327 | - | 1 | OS07G0583200 | CUFF.1162 OS07T05832(i | TSS8349 | 3.091E-66 |           |

|      |                |             |          |          |   |   |              |                        |   |         |           |
|------|----------------|-------------|----------|----------|---|---|--------------|------------------------|---|---------|-----------|
| chr7 | TCONS_00088059 | XLOC_078611 | 23643879 | 23644116 | - | 1 | NA           | CUFF.1162 NA           | u | TSS8350 | 8.259E-31 |
| chr7 | TCONS_00089579 | XLOC_078612 | 23650893 | 23651648 | - | 1 | CIGR2        | CUFF.1488 OS07T05836(i |   | TSS8350 | 2.854E-39 |
| chr7 | TCONS_00089580 | XLOC_078615 | 23673603 | 23674367 | - | 1 | OS07G0584000 | CUFF.1488 OS07T05840(i |   | TSS8350 | 1.749E-06 |
| chr7 | TCONS_00088062 | XLOC_078616 | 23675318 | 23675692 | - | 1 | OS07G0584000 | CUFF.1163 OS07T05840(i |   | TSS8350 | 6.078E-07 |
| chr7 | TCONS_00088064 | XLOC_078618 | 23678795 | 23679069 | - | 1 | WNK5         | CUFF.1162 OS07T05841(i |   | TSS8350 | 5.832E-57 |
| chr7 | TCONS_00089582 | XLOC_078627 | 23723515 | 23723771 | - | 1 | OS07G0584900 | CUFF.1488 OS07T05849(i |   | TSS8351 | 1.959E-24 |
| chr7 | TCONS_00089583 | XLOC_078630 | 23746666 | 23747061 | - | 1 | OS07G0585000 | CUFF.1489 OS07T05850(i |   | TSS8352 | 1.835E-12 |
| chr7 | TCONS_00088076 | XLOC_078632 | 23782502 | 23783508 | - | 1 | OS07G0585500 | CUFF.1163 OS07T05855(x |   | TSS8352 | 2.658E-40 |
| chr7 | TCONS_00088201 | XLOC_078756 | 24700762 | 24700996 | - | 1 | OS07G0603600 | CUFF.1166 OS07T06036(i |   | TSS8365 | 2.603E-09 |
| chr7 | TCONS_00088213 | XLOC_078766 | 24767740 | 24767947 | - | 1 | NA           | CUFF.1166 NA           | u | TSS8366 | 0         |
| chr7 | TCONS_00089596 | XLOC_078768 | 24793679 | 24793880 | - | 1 | MADS18       | CUFF.1493 OS07T06052(x |   | TSS8366 | 3.162E-76 |
| chr7 | TCONS_00089599 | XLOC_078812 | 25046082 | 25046944 | - | 1 | OS07G0608900 | CUFF.1494 OS07T06089(x |   | TSS8371 | 1.05E-15  |
| chr7 | TCONS_00088267 | XLOC_078819 | 25104329 | 25104540 | - | 1 | NA           | CUFF.1168 NA           | u | TSS8371 | 2.58E-41  |
| chr7 | TCONS_00089603 | XLOC_078837 | 25260172 | 25260372 | - | 1 | OS07G0613600 | CUFF.1495 OS07T06136(x |   | TSS8373 | 3.721E-34 |
| chr7 | TCONS_00089610 | XLOC_078880 | 25607649 | 25608100 | - | 1 | NA           | CUFF.1498 NA           | u | TSS8378 | 1.059E-39 |
| chr7 | TCONS_00089611 | XLOC_078881 | 25608505 | 25608888 | - | 1 | NA           | CUFF.1498 NA           | u | TSS8378 | 4.2E-31   |
| chr7 | TCONS_00088371 | XLOC_078925 | 25972609 | 25973049 | - | 1 | NA           | CUFF.1172 NA           | u | TSS8383 | 1.164E-32 |
| chr7 | TCONS_00089615 | XLOC_078925 | 25972760 | 25974030 | - | 1 | NA           | CUFF.1501 NA           | u | TSS8383 | 0.000165  |
| chr7 | TCONS_00089617 | XLOC_078927 | 25974924 | 25975249 | - | 1 | NA           | CUFF.1502 NA           | u | TSS8383 | 1.387E-18 |
| chr7 | TCONS_00089622 | XLOC_078964 | 26235931 | 26236132 | - | 1 | OS07G0632600 | CUFF.1503 OS07T06326(i |   | TSS8387 | 3.249E-27 |
| chr7 | TCONS_00089627 | XLOC_078991 | 26404196 | 26404503 | - | 1 | LT16A        | CUFF.1505 OS07T06359(x |   | TSS8390 | 9.158E-23 |
| chr7 | TCONS_00089629 | XLOC_079015 | 26642928 | 26643231 | - | 1 | OS07G0640200 | CUFF.1506 OS07T06402(i |   | TSS8392 | 5.596E-40 |
| chr7 | TCONS_00089631 | XLOC_079047 | 26845216 | 26845999 | - | 1 | OS07G0644600 | CUFF.1508 OS07T06446(x |   | TSS8396 | 1.713E-27 |
| chr7 | TCONS_00089637 | XLOC_079065 | 26959738 | 26960188 | - | 1 | NA           | CUFF.1509 NA           | u | TSS8398 | 1.508E-53 |
| chr7 | TCONS_00089640 | XLOC_079071 | 26989272 | 26989472 | - | 1 | NA           | CUFF.1509 NA           | u | TSS8398 | 1.508E-30 |
| chr7 | TCONS_00089643 | XLOC_079086 | 27074139 | 27074344 | - | 1 | OS07G0648266 | CUFF.1511 OS07T06482(i |   | TSS8400 | 2.638E-18 |
| chr7 | TCONS_00088535 | XLOC_079089 | 27080136 | 27080345 | - | 1 | NA           | CUFF.1179 NA           | u | TSS8400 | 1.463E-38 |
| chr7 | TCONS_00089644 | XLOC_079089 | 27080273 | 27080502 | - | 1 | NA           | CUFF.1510 NA           | u | TSS8401 | 1.512E-25 |
| chr7 | TCONS_00088568 | XLOC_079122 | 27550155 | 27550508 | - | 1 | OS07G0655300 | CUFF.1512 OS07T06553(x |   | TSS8404 | 5.473E-15 |
| chr7 | TCONS_00089645 | XLOC_079123 | 27550639 | 27550839 | - | 1 | NA           | CUFF.1511 NA           | u | TSS8404 | 6.994E-29 |
| chr7 | TCONS_00089649 | XLOC_079145 | 27713029 | 27713242 | - | 1 | NA           | CUFF.1512 NA           | u | TSS8406 | 4.53E-16  |
| chr7 | TCONS_00089657 | XLOC_079204 | 28052757 | 28053196 | - | 1 | NA           | CUFF.1516 NA           | u | TSS8412 | 2.838E-66 |
| chr7 | TCONS_00088684 | XLOC_079240 | 28263552 | 28263771 | - | 1 | NA           | CUFF.1185 NA           | u | TSS8416 | 3.192E-33 |
| chr7 | TCONS_00089662 | XLOC_079241 | 28263908 | 28264251 | - | 1 | NA           | CUFF.1517 NA           | u | TSS8416 | 1.562E-40 |
| chr7 | TCONS_00089663 | XLOC_079245 | 28269517 | 28269745 | - | 1 | NA           | CUFF.1517 NA           | u | TSS8417 | 1.859E-10 |



|      |                |             |          |          |   |   |              |                        |   |         |           |
|------|----------------|-------------|----------|----------|---|---|--------------|------------------------|---|---------|-----------|
| chr7 | TCONS_00089668 | XLOC_079273 | 28413936 | 28414171 | - | 1 | NA           | CUFF.1518 NA           | u | TSS8420 | 7.585E-13 |
| chr7 | TCONS_00089670 | XLOC_079284 | 28485420 | 28485732 | - | 1 | NA           | CUFF.1519 NA           | u | TSS8421 | 1.739E-22 |
| chr7 | TCONS_00089673 | XLOC_079308 | 28712674 | 28712883 | - | 1 | NA           | CUFF.1520 NA           | u | TSS8423 | 3.414E-08 |
| chr7 | TCONS_00088786 | XLOC_079341 | 28890042 | 28890266 | - | 1 | NCRNA_3660   | CUFF.1189 NCRNA_3660(x |   | TSS8427 | 2.232E-65 |
| chr7 | TCONS_00089675 | XLOC_079352 | 28965701 | 28965906 | - | 1 | APY2         | CUFF.1523 OS07T06828(x |   | TSS8428 | 1.19E-21  |
| chr7 | TCONS_00089676 | XLOC_079365 | 29074404 | 29074736 | - | 1 | WOX11        | CUFF.1524 OS07T06849(i |   | TSS8430 | 3.839E-19 |
| chr7 | TCONS_00088822 | XLOC_079377 | 29161565 | 29161882 | - | 1 | NA           | CUFF.1190 NA           | u | TSS8431 | 1.168E-41 |
| chr7 | TCONS_00088842 | XLOC_079393 | 29256312 | 29256654 | - | 1 | OS07G0688500 | CUFF.1191 OS07T06885(x |   | TSS8433 | 8.316E-26 |
| chr7 | TCONS_00089679 | XLOC_079403 | 29329339 | 29329869 | - | 1 | NA           | CUFF.1525 NA           | u | TSS8434 | 6.821E-10 |
| chr7 | TCONS_00088868 | XLOC_079418 | 29467599 | 29467833 | - | 1 | NA           | CUFF.1192 NA           | u | TSS8435 | 4.378E-29 |
| chr7 | TCONS_00089691 | XLOC_079461 | 21139246 | 21139447 | . | 1 | OS07G0537500 | CUFF.1475 OS07T05375(i |   | TSS8440 | 2.943E-20 |
| chr8 | TCONS_00096333 | XLOC_079489 | 115837   | 116091   | + | 1 | OS08G0102100 | CUFF.1529 OS08T01021(i |   | TSS8443 | 4.824E-23 |
| chr8 | TCONS_00089735 | XLOC_079505 | 271262   | 271474   | + | 1 | OS08G0104900 | CUFF.1195 OS08T01049(i |   | TSS8445 | 1.78E-57  |
| chr8 | TCONS_00089760 | XLOC_079531 | 434960   | 435244   | + | 1 | OS08G0108700 | CUFF.1196 OS08T01087(x |   | TSS8447 | 1.484E-11 |
| chr8 | TCONS_00089761 | XLOC_079532 | 436268   | 436484   | + | 1 | OS08G0108700 | CUFF.1196 OS08T01087(x |   | TSS8448 | 8.688E-46 |
| chr8 | TCONS_00089838 | XLOC_079605 | 915798   | 916006   | + | 1 | NA           | CUFF.1198 NA           | u | TSS8455 | 0         |
| chr8 | TCONS_00096344 | XLOC_079606 | 916728   | 916929   | + | 1 | NA           | CUFF.1534 NA           | u | TSS8456 | 1.512E-25 |
| chr8 | TCONS_00089841 | XLOC_079609 | 919493   | 919753   | + | 1 | NA           | CUFF.1198 NA           | u | TSS8456 | 4.736E-21 |
| chr8 | TCONS_00096348 | XLOC_079611 | 920655   | 921018   | + | 1 | NA           | CUFF.1534 NA           | u | TSS8456 | 0.002878  |
| chr8 | TCONS_00089847 | XLOC_079616 | 965674   | 965901   | + | 1 | NA           | CUFF.1199 NA           | u | TSS8457 | 2.024E-15 |
| chr8 | TCONS_00096351 | XLOC_079642 | 1125228  | 1125517  | + | 1 | OS08G0120500 | CUFF.1536 OS08T01205(x |   | TSS8459 | 6.821E-10 |
| chr8 | TCONS_00096354 | XLOC_079656 | 1207037  | 1207328  | + | 1 | OS08G0122000 | CUFF.1536 OS08T01220(i |   | TSS8461 | 4.2E-31   |
| chr8 | TCONS_00089924 | XLOC_079696 | 1569493  | 1569696  | + | 1 | NA           | CUFF.1200 NA           | u | TSS8465 | 6.622E-39 |
| chr8 | TCONS_00096356 | XLOC_079697 | 1572609  | 1572972  | + | 1 | NA           | CUFF.1537 NA           | u | TSS8465 | 9.541E-18 |
| chr8 | TCONS_00096357 | XLOC_079698 | 1573029  | 1573472  | + | 1 | NA           | CUFF.1537 NA           | u | TSS8465 | 1.533E-40 |
| chr8 | TCONS_00096358 | XLOC_079699 | 1573696  | 1573992  | + | 1 | NA           | CUFF.1537 NA           | u | TSS8465 | 1.033E-24 |
| chr8 | TCONS_00096366 | XLOC_079796 | 2268670  | 2268989  | + | 1 | OS08G0140500 | CUFF.1541 OS08T01405(x |   | TSS8476 | 9.939E-09 |
| chr8 | TCONS_00096370 | XLOC_079819 | 2578996  | 2579196  | + | 1 | OS08G0145600 | CUFF.1541 OS08T01456(i |   | TSS8478 | 3.249E-27 |
| chr8 | TCONS_00096372 | XLOC_079860 | 3061968  | 3062294  | + | 1 | NA           | CUFF.1543 NA           | u | TSS8482 | 8.51E-46  |
| chr8 | TCONS_00090108 | XLOC_079877 | 3167882  | 3168378  | + | 1 | NCRNA_39536  | CUFF.1544 NCRNA_395(x  |   | TSS8484 | 1.55E-39  |
| chr8 | TCONS_00090109 | XLOC_079878 | 3168831  | 3169068  | + | 1 | OS08G0155000 | CUFF.1206 OS08T01550(i |   | TSS8484 | 2.476E-13 |
| chr8 | TCONS_00096376 | XLOC_079878 | 3168751  | 3168956  | + | 1 | OS08G0155000 | CUFF.1544 OS08T01550(i |   | TSS8484 | 0         |
| chr8 | TCONS_00096386 | XLOC_079908 | 3339145  | 3339485  | + | 1 | ROMT-9       | CUFF.1546 OS08T01575(i |   | TSS8488 | 0.30177   |
| chr8 | TCONS_00096387 | XLOC_079909 | 3339654  | 3340249  | + | 1 | ROMT-9       | CUFF.1547 OS08T01575(i |   | TSS8488 | 3.088E-07 |
| chr8 | TCONS_00096389 | XLOC_079929 | 3463121  | 3463509  | + | 1 | LSD1         | CUFF.1547 OS08T01595(x |   | TSS8490 | 4.766E-28 |

|      |                |             |          |          |   |   |              |                        |   |         |           |
|------|----------------|-------------|----------|----------|---|---|--------------|------------------------|---|---------|-----------|
| chr8 | TCONS_00096390 | XLOC_079930 | 3464431  | 3464635  | + | 1 | NA           | CUFF.1546 NA           | u | TSS8490 | 1.17E-31  |
| chr8 | TCONS_00090165 | XLOC_079932 | 3508845  | 3509051  | + | 1 | OS08G0159800 | CUFF.1209 OS08T01598(x |   | TSS8490 | 0.04715   |
| chr8 | TCONS_00096398 | XLOC_080026 | 4150377  | 4150737  | + | 1 | NA           | CUFF.1551 NA           | u | TSS8500 | 1.739E-22 |
| chr8 | TCONS_00096402 | XLOC_080058 | 4387933  | 4388252  | + | 1 | OS08G0175200 | CUFF.1554 OS08T01752(i |   | TSS8503 | 1.326E-28 |
| chr8 | TCONS_00096405 | XLOC_080073 | 4510573  | 4510977  | + | 1 | NA           | CUFF.1553 NA           | u | TSS8505 | 1.027E-29 |
| chr8 | TCONS_00096406 | XLOC_080074 | 4511578  | 4512284  | + | 1 | NA           | CUFF.1553 NA           | u | TSS8505 | 3.279E-41 |
| chr8 | TCONS_00090321 | XLOC_080092 | 4603613  | 4603813  | + | 1 | OS08G0178700 | CUFF.1214 OS08T01787(x |   | TSS8507 | 0         |
| chr8 | TCONS_00096410 | XLOC_080093 | 4610963  | 4611166  | + | 1 | OS08G0178800 | CUFF.1555 OS08T01788(i |   | TSS8507 | 6.268E-22 |
| chr8 | TCONS_00096413 | XLOC_080120 | 4843376  | 4843583  | + | 1 | NA           | CUFF.1556 NA           | u | TSS8510 | 4.824E-23 |
| chr8 | TCONS_00096415 | XLOC_080128 | 4956769  | 4957131  | + | 1 | NA           | CUFF.1556 NA           | u | TSS8511 | 7.869E-14 |
| chr8 | TCONS_00090358 | XLOC_080130 | 4961790  | 4961992  | + | 1 | NA           | CUFF.1216 NA           | u | TSS8511 | 0         |
| chr8 | TCONS_00096417 | XLOC_080131 | 4963719  | 4963974  | + | 1 | NA           | CUFF.1557 NA           | u | TSS8511 | 2.38E-16  |
| chr8 | TCONS_00090408 | XLOC_080182 | 5327180  | 5327673  | + | 1 | OS08G0191100 | CUFF.1217 OS08T01911(x |   | TSS8516 | 0         |
| chr8 | TCONS_00096423 | XLOC_080187 | 5332778  | 5333071  | + | 1 | NA           | CUFF.1559 NA           | u | TSS8517 | 4.872E-05 |
| chr8 | TCONS_00096424 | XLOC_080188 | 5334059  | 5334468  | + | 1 | NA           | CUFF.1559 NA           | u | TSS8517 | 9.036E-28 |
| chr8 | TCONS_00090448 | XLOC_080223 | 5521670  | 5521890  | + | 1 | NA           | CUFF.1218 NA           | u | TSS8520 | 1.654E-75 |
| chr8 | TCONS_00096429 | XLOC_080224 | 5522359  | 5522573  | + | 1 | NA           | CUFF.1560 NA           | u | TSS8520 | 1.815E-17 |
| chr8 | TCONS_00090477 | XLOC_080254 | 5685118  | 5685480  | + | 1 | NA           | CUFF.1219 NA           | u | TSS8524 | 1.893E-83 |
| chr8 | TCONS_00096434 | XLOC_080255 | 5685760  | 5685969  | + | 1 | NA           | CUFF.1560 NA           | u | TSS8524 | 9.158E-23 |
| chr8 | TCONS_00090480 | XLOC_080257 | 5686606  | 5686853  | + | 1 | NA           | CUFF.1218 NA           | u | TSS8524 | 2.98E-24  |
| chr8 | TCONS_00096436 | XLOC_080258 | 5687151  | 5687355  | + | 1 | NA           | CUFF.1561 NA           | u | TSS8524 | 2.638E-18 |
| chr8 | TCONS_00090493 | XLOC_080270 | 5810359  | 5810936  | + | 1 | NA           | CUFF.1219 NA           | u | TSS8525 | 5.909E-30 |
| chr8 | TCONS_00096439 | XLOC_080271 | 5814860  | 5815099  | + | 1 | OS08G0200400 | CUFF.1562 OS08T02004(x |   | TSS8526 | 2.064E-44 |
| chr8 | TCONS_00096442 | XLOC_080315 | 6243975  | 6244201  | + | 1 | OS08G0207000 | CUFF.1564 OS08T02070(x |   | TSS8530 | 2.529E-33 |
| chr8 | TCONS_00096444 | XLOC_080357 | 6741517  | 6741718  | + | 1 | OS08G0215400 | CUFF.1565 OS08T02154(i |   | TSS8535 | 7.048E-34 |
| chr8 | TCONS_00090659 | XLOC_080417 | 7562397  | 7562624  | + | 1 | OS08G0224200 | CUFF.1224 OS08T02242(i |   | TSS8541 | 2.272E-18 |
| chr8 | TCONS_00096448 | XLOC_080456 | 7950156  | 7950405  | + | 1 | OS08G0230300 | CUFF.1568 OS08T02303(x |   | TSS8545 | 1.361E-38 |
| chr8 | TCONS_00090702 | XLOC_080463 | 7981607  | 7981808  | + | 1 | NA           | CUFF.1225 NA           | u | TSS8546 | 6.785E-89 |
| chr8 | TCONS_00096456 | XLOC_080507 | 8338795  | 8339086  | + | 1 | OS08G0237100 | CUFF.1569 OS08T02371(x |   | TSS8551 | 5.636E-58 |
| chr8 | TCONS_00090816 | XLOC_080578 | 8904216  | 8904776  | + | 1 | NA           | CUFF.1226 NA           | u | TSS8558 | 1.593E-63 |
| chr8 | TCONS_00090904 | XLOC_080667 | 9629609  | 9629845  | + | 1 | XBOS35       | CUFF.1229 OS08T02582(i |   | TSS8567 | 0         |
| chr8 | TCONS_00096463 | XLOC_080668 | 9632012  | 9632401  | + | 1 | XBOS35       | CUFF.1573 OS08T02582(x |   | TSS8567 | 5.463E-13 |
| chr8 | TCONS_00090968 | XLOC_080729 | 10270899 | 10271102 | + | 1 | NA           | CUFF.1229 NA           | u | TSS8573 | 1.086E-64 |
| chr8 | TCONS_00091135 | XLOC_080883 | 11794000 | 11794244 | + | 1 | OS08G0293300 | CUFF.1235 OS08T02933(i |   | TSS8590 | 0         |
| chr8 | TCONS_00096473 | XLOC_080890 | 11872288 | 11872744 | + | 1 | NA           | CUFF.1578 NA           | u | TSS8591 | 0.0002217 |

|      |                |             |          |          |   |   |              |                        |   |         |           |
|------|----------------|-------------|----------|----------|---|---|--------------|------------------------|---|---------|-----------|
| chr8 | TCONS_00091143 | XLOC_080891 | 11872962 | 11873219 | + | 1 | NA           | CUFF.1234 NA           | u | TSS8591 | 1.19E-21  |
| chr8 | TCONS_00096475 | XLOC_080892 | 11873297 | 11873760 | + | 1 | NA           | CUFF.1579 NA           | u | TSS8591 | 1.043E-12 |
| chr8 | TCONS_00091145 | XLOC_080894 | 11875053 | 11875290 | + | 1 | OS08G0295100 | CUFF.1234 OS08T02951(x |   | TSS8591 | 4.745E-28 |
| chr8 | TCONS_00096478 | XLOC_080899 | 11958979 | 11959185 | + | 1 | OS08G0296600 | CUFF.1579 OS08T02966(i |   | TSS8591 | 5.592E-20 |
| chr8 | TCONS_00096482 | XLOC_080941 | 12429594 | 12429804 | + | 1 | NA           | CUFF.1580 NA           | u | TSS8596 | 9.158E-23 |
| chr8 | TCONS_00091201 | XLOC_080955 | 12721899 | 12722123 | + | 1 | OS08G0305000 | CUFF.1236 OS08T03050(i |   | TSS8597 | 2.325E-27 |
| chr8 | TCONS_00096484 | XLOC_080972 | 12907927 | 12908142 | + | 1 | OS08G0308100 | CUFF.1581 OS08T03081(i |   | TSS8599 | 1.502E-66 |
| chr8 | TCONS_00096485 | XLOC_080973 | 12909701 | 12909905 | + | 1 | OS08G0308100 | CUFF.1581 OS08T03081(i |   | TSS8599 | 5.592E-20 |
| chr8 | TCONS_00091223 | XLOC_080978 | 13003441 | 13003666 | + | 1 | OS08G0308700 | CUFF.1237 OS08T03087(i |   | TSS8599 | 4.746E-28 |
| chr8 | TCONS_00096486 | XLOC_080979 | 13031567 | 13031781 | + | 1 | OS08G0309300 | CUFF.1581 OS08T03093(i |   | TSS8600 | 1.02E-52  |
| chr8 | TCONS_00091282 | XLOC_081042 | 14016604 | 14016842 | + | 1 | NA           | CUFF.1237 NA           | u | TSS8606 | 6.15E-12  |
| chr8 | TCONS_00096493 | XLOC_081045 | 14049486 | 14049688 | + | 1 | NA           | CUFF.1583 NA           | u | TSS8606 | 6.161E-27 |
| chr8 | TCONS_00096495 | XLOC_081055 | 14109039 | 14109302 | + | 1 | OS08G0323000 | CUFF.1585 OS08T03230(i |   | TSS8607 | 6.994E-29 |
| chr8 | TCONS_00091303 | XLOC_081065 | 14187817 | 14188034 | + | 1 | NA           | CUFF.1238 NA           | u | TSS8608 | 5.132E-32 |
| chr8 | TCONS_00096503 | XLOC_081086 | 14314703 | 14315066 | + | 1 | NA           | CUFF.1585 NA           | u | TSS8611 | 3.249E-27 |
| chr8 | TCONS_00096507 | XLOC_081129 | 14720959 | 14721159 | + | 1 | OS08G0332600 | CUFF.1586 OS08T03326(x |   | TSS8615 | 9.806E-48 |
| chr8 | TCONS_00091387 | XLOC_081155 | 14982746 | 14982973 | + | 1 | OS08G0335000 | CUFF.1242 OS08T03350(i |   | TSS8618 | 1.672E-17 |
| chr8 | TCONS_00096511 | XLOC_081218 | 15630030 | 15630320 | + | 1 | NA           | CUFF.1589 NA           | u | TSS8624 | 5.016E-18 |
| chr8 | TCONS_00091469 | XLOC_081230 | 15741830 | 15742071 | + | 1 | NA           | CUFF.1244 NA           | u | TSS8626 | 3.534E-22 |
| chr8 | TCONS_00096519 | XLOC_081382 | 17558777 | 17559289 | + | 1 | OS08G0374600 | CUFF.1593 OS08T03746(x |   | TSS8641 | 0         |
| chr8 | TCONS_00096522 | XLOC_081413 | 17816937 | 17817281 | + | 1 | OS08G0378800 | CUFF.1594 OS08T03788(i |   | TSS8645 | 1.388E-11 |
| chr8 | TCONS_00091656 | XLOC_081417 | 17833702 | 17833922 | + | 1 | OS08G0379000 | CUFF.1247 OS08T03790(i |   | TSS8645 | 9.708E-34 |
| chr8 | TCONS_00091666 | XLOC_081427 | 17949020 | 17949251 | + | 1 | NA           | CUFF.1247 NA           | u | TSS8646 | 9.83E-24  |
| chr8 | TCONS_00091686 | XLOC_081444 | 18132424 | 18133357 | + | 1 | OS08G0384500 | CUFF.1251 OS08T03845(x |   | TSS8648 | 2.885E-30 |
| chr8 | TCONS_00096525 | XLOC_081446 | 18134102 | 18134560 | + | 1 | NA           | CUFF.1596 NA           | u | TSS8648 | 3.047E-24 |
| chr8 | TCONS_00096529 | XLOC_081471 | 18275866 | 18276337 | + | 1 | NA           | CUFF.1596 NA           | u | TSS8651 | 2.335E-22 |
| chr8 | TCONS_00096532 | XLOC_081498 | 18528589 | 18528789 | + | 1 | OS08G0391300 | CUFF.1597 OS08T03913(i |   | TSS8654 | 2.061E-83 |
| chr8 | TCONS_00096535 | XLOC_081546 | 18965096 | 18965460 | + | 1 | OS08G0398000 | CUFF.1600 OS08T03980(i |   | TSS8659 | 5.463E-13 |
| chr8 | TCONS_00091924 | XLOC_081661 | 19895042 | 19895255 | + | 1 | NA           | CUFF.1255 NA           | u | TSS8671 | 3.488E-37 |
| chr8 | TCONS_00096544 | XLOC_081662 | 19901804 | 19902201 | + | 1 | OS08G0416100 | CUFF.1604 OS08T04161(x |   | TSS8671 | 1.615E-05 |
| chr8 | TCONS_00091925 | XLOC_081663 | 19904412 | 19904644 | + | 1 | OS08G0416100 | CUFF.1255 OS08T04161(i |   | TSS8671 | 4.21E-20  |
| chr8 | TCONS_00096549 | XLOC_081709 | 20248821 | 20249277 | + | 1 | OS08G0422600 | CUFF.1606 OS08T04226(x |   | TSS8676 | 5.596E-40 |
| chr8 | TCONS_00096550 | XLOC_081720 | 20363866 | 20364260 | + | 1 | NA           | CUFF.1606 NA           | u | TSS8677 | 4.791E-33 |
| chr8 | TCONS_00096551 | XLOC_081721 | 20365102 | 20365575 | + | 1 | NA           | CUFF.1606 NA           | u | TSS8677 | 0.0014412 |
| chr8 | TCONS_00096552 | XLOC_081752 | 20582579 | 20582804 | + | 1 | OS08G0427900 | CUFF.1608 OS08T04279(i |   | TSS8680 | 1.335E-33 |

|      |                |             |          |          |   |   |              |           |              |         |           |           |
|------|----------------|-------------|----------|----------|---|---|--------------|-----------|--------------|---------|-----------|-----------|
| chr8 | TCONS_00096554 | XLOC_081766 | 20698916 | 20699160 | + | 1 | OS08G0429200 | CUFF.1607 | OS08T04292(x | TSS8681 | 6.161E-27 |           |
| chr8 | TCONS_00092124 | XLOC_081867 | 21511779 | 21512319 | + | 1 | OS08G0441500 | CUFF.1261 | OS08T04415(i | TSS8692 | 0         |           |
| chr8 | TCONS_00092138 | XLOC_081881 | 21630793 | 21631000 | + | 1 | NA           | CUFF.1260 | NA           | u       | TSS8693   | 1.007E-43 |
| chr8 | TCONS_00096566 | XLOC_081902 | 21820865 | 21821110 | + | 1 | OS08G0447000 | CUFF.1613 | OS08T04470(i | TSS8695 | 6.901E-52 |           |
| chr8 | TCONS_00092161 | XLOC_081904 | 21845499 | 21845726 | + | 1 | OS08G0447300 | CUFF.1261 | OS08T04473(i | TSS8695 | 6.012E-30 |           |
| chr8 | TCONS_00096567 | XLOC_081905 | 21845779 | 21845998 | + | 1 | OS08G0447300 | CUFF.1613 | OS08T04473(i | TSS8696 | 0.0001868 |           |
| chr8 | TCONS_00096568 | XLOC_081906 | 21846174 | 21846466 | + | 1 | OS08G0447300 | CUFF.1612 | OS08T04473(x | TSS8696 | 3.839E-19 |           |
| chr8 | TCONS_00096572 | XLOC_081918 | 21953750 | 21954143 | + | 1 | OS08G0449500 | CUFF.1614 | OS08T04495(i | TSS8697 | 3.802E-12 |           |
| chr8 | TCONS_00096573 | XLOC_081931 | 22046578 | 22046787 | + | 1 | OS08G0451400 | CUFF.1614 | OS08T04514(i | TSS8698 | 1.063E-19 |           |
| chr8 | TCONS_00092186 | XLOC_081932 | 22064427 | 22064641 | + | 1 | OS08G0451500 | CUFF.1263 | OS08T04515(i | TSS8698 | 1.612E-64 |           |
| chr8 | TCONS_00096574 | XLOC_081933 | 22065612 | 22065825 | + | 1 | OS08G0451500 | CUFF.1615 | OS08T04515(i | TSS8699 | 2.165E-14 |           |
| chr8 | TCONS_00092189 | XLOC_081938 | 22099238 | 22099467 | + | 1 | NA           | CUFF.1262 | NA           | u       | TSS8699   | 1.561E-32 |
| chr8 | TCONS_00096585 | XLOC_082101 | 23417062 | 23417262 | + | 1 | NA           | CUFF.1619 | NA           | u       | TSS8716   | 8.25E-41  |
| chr8 | TCONS_00092379 | XLOC_082118 | 23579088 | 23579298 | + | 1 | OS08G0478100 | CUFF.1267 | OS08T04781(x | TSS8718 | 5.608E-86 |           |
| chr8 | TCONS_00096587 | XLOC_082119 | 23581363 | 23581707 | + | 1 | OS08G0478200 | CUFF.1620 | OS08T04782(i | TSS8718 | 1.739E-22 |           |
| chr8 | TCONS_00096588 | XLOC_082143 | 23803543 | 23803874 | + | 1 | NA           | CUFF.1621 | NA           | u       | TSS8720   | 7.264E-12 |
| chr8 | TCONS_00096591 | XLOC_082154 | 23852943 | 23853358 | + | 1 | OS08G0482600 | CUFF.1621 | OS08T04826(x | TSS8722 | 7.297E-19 |           |
| chr8 | TCONS_00092416 | XLOC_082157 | 23858282 | 23858654 | + | 1 | NA           | CUFF.1268 | NA           | u       | TSS8722   | 1.996E-18 |
| chr8 | TCONS_00092597 | XLOC_082325 | 25043459 | 25043679 | + | 1 | NA           | CUFF.1272 | NA           | u       | TSS8740   | 6.863E-19 |
| chr8 | TCONS_00096605 | XLOC_082329 | 25052734 | 25052937 | + | 1 | NA           | CUFF.1628 | NA           | u       | TSS8740   | 1.326E-28 |
| chr8 | TCONS_00092616 | XLOC_082347 | 25219383 | 25219597 | + | 1 | CM-LOX1      | CUFF.1275 | OS08T05088(i | TSS8742 | 4.369E-50 |           |
| chr8 | TCONS_00092617 | XLOC_082348 | 25220437 | 25220647 | + | 1 | CM-LOX1      | CUFF.1275 | OS08T05088(i | TSS8742 | 8.458E-80 |           |
| chr8 | TCONS_00096611 | XLOC_082422 | 25689737 | 25690008 | + | 1 | OS08G0517600 | CUFF.1632 | OS08T05176(x | TSS8750 | 1.179E-54 |           |
| chr8 | TCONS_00096615 | XLOC_082449 | 25872617 | 25872941 | + | 1 | NA           | CUFF.1633 | NA           | u       | TSS8753   | 0         |
| chr8 | TCONS_00092753 | XLOC_082479 | 26121254 | 26121644 | + | 1 | OS08G0525000 | CUFF.1277 | OS08T05250(x | TSS8756 | 4.436E-24 |           |
| chr8 | TCONS_00092759 | XLOC_082485 | 26164055 | 26164268 | + | 1 | NA           | CUFF.1278 | NA           | u       | TSS8757   | 1.382E-55 |
| chr8 | TCONS_00096621 | XLOC_082493 | 26231186 | 26231821 | + | 1 | NA           | CUFF.1635 | NA           | u       | TSS8758   | 1.758E-06 |
| chr8 | TCONS_00096622 | XLOC_082496 | 26264878 | 26265078 | + | 1 | OS08G0527600 | CUFF.1636 | OS08T05276(i | TSS8758 | 2.139E-49 |           |
| chr8 | TCONS_00092776 | XLOC_082501 | 26309319 | 26309561 | + | 1 | OS08G0528500 | CUFF.1278 | OS08T05285(x | TSS8759 | 1.33E-29  |           |
| chr8 | TCONS_00096627 | XLOC_082577 | 26795262 | 26795497 | + | 1 | OS08G0536300 | CUFF.1639 | OS08T05363(i | TSS8767 | 7.959E-31 |           |
| chr8 | TCONS_00092876 | XLOC_082590 | 26882532 | 26882745 | + | 1 | NA           | CUFF.1281 | NA           | u       | TSS8768   | 8.039E-75 |
| chr8 | TCONS_00092888 | XLOC_082600 | 26929914 | 26930124 | + | 1 | NA           | CUFF.1281 | NA           | u       | TSS8770   | 0         |
| chr8 | TCONS_00096633 | XLOC_082653 | 27324441 | 27324828 | + | 1 | OS08G0545500 | CUFF.1641 | OS08T05455(x | TSS8775 | 3.907E-44 |           |
| chr8 | TCONS_00092979 | XLOC_082691 | 27547963 | 27548225 | + | 1 | NA           | CUFF.1284 | NA           | u       | TSS8779   | 2.608E-63 |
| chr8 | TCONS_00096639 | XLOC_082692 | 27558611 | 27558901 | + | 1 | APX4         | CUFF.1644 | OS08T05491(i | TSS8779 | 2.02E-19  |           |

|      |                |             |          |          |   |   |              |           |              |         |           |           |
|------|----------------|-------------|----------|----------|---|---|--------------|-----------|--------------|---------|-----------|-----------|
| chr8 | TCONS_00096642 | XLOC_082695 | 27567887 | 27568100 | + | 1 | OS08G0549300 | CUFF.1643 | OS08T05493(x | TSS8779 | 1.512E-25 |           |
| chr8 | TCONS_00096643 | XLOC_082701 | 27588182 | 27588500 | + | 1 | OS08G0550100 | CUFF.1644 | OS08T05501(x | TSS8780 | 0.0023321 |           |
| chr8 | TCONS_00093067 | XLOC_082778 | 27962113 | 27962353 | + | 1 | OS08G0558700 | CUFF.1286 | OS08T05587(i | TSS8788 | 1.238E-25 |           |
| chr8 | TCONS_00096648 | XLOC_082781 | 27970280 | 27970483 | + | 1 | OS08G0559000 | CUFF.1646 | OS08T05590(x | TSS8789 | 1.25E-16  |           |
| chr8 | TCONS_00093098 | XLOC_082810 | 28170315 | 28170525 | + | 1 | OS08G0562600 | CUFF.1287 | OS08T05626(x | TSS8791 | 2.139E-77 |           |
| chr8 | TCONS_00093146 | XLOC_082855 | 82374    | 82591    | - | 1 | OS08G0101400 | CUFF.1194 | OS08T01014(i | TSS8796 | 1.14E-26  |           |
| chr8 | TCONS_00093195 | XLOC_082895 | 369023   | 369231   | - | 1 | OS08G0107500 | CUFF.1196 | OS08T01075(i | TSS8801 | 0         |           |
| chr8 | TCONS_00096660 | XLOC_082949 | 702103   | 702523   | - | 1 | FRK2         | CUFF.1533 | OS08T01131(x | TSS8806 | 7.297E-19 |           |
| chr8 | TCONS_00096661 | XLOC_083036 | 1526614  | 1526832  | - | 1 | GAPC1        | CUFF.1546 | OS08T01263(x | TSS8815 | 8.25E-41  |           |
| chr8 | TCONS_00096667 | XLOC_083084 | 1848531  | 1849131  | - | 1 | NA           | CUFF.1538 | NA           | u       | TSS8820   | 0.081063  |
| chr8 | TCONS_00096668 | XLOC_083085 | 1850039  | 1850244  | - | 1 | NA           | CUFF.1538 | NA           | u       | TSS8820   | 5.418E-30 |
| chr8 | TCONS_00093404 | XLOC_083093 | 2030175  | 2030379  | - | 1 | OS08G0135900 | CUFF.1204 | OS08T01359(i | TSS8821 | 2.724E-85 |           |
| chr8 | TCONS_00093414 | XLOC_083103 | 2085565  | 2085783  | - | 1 | ARP4         | CUFF.1202 | OS08T01372(x | TSS8822 | 1.237E-35 |           |
| chr8 | TCONS_00093418 | XLOC_083108 | 2129825  | 2130047  | - | 1 | OS08G0137800 | CUFF.1202 | OS08T01378(x | TSS8823 | 0         |           |
| chr8 | TCONS_00093463 | XLOC_083147 | 2434563  | 2434795  | - | 1 | OS08G0144000 | CUFF.1203 | OS08T01440(i | TSS8827 | 5.524E-13 |           |
| chr8 | TCONS_00093499 | XLOC_083180 | 2880668  | 2880892  | - | 1 | NA           | CUFF.1204 | NA           | u       | TSS8830   | 9.128E-40 |
| chr8 | TCONS_00093500 | XLOC_083181 | 2886384  | 2886607  | - | 1 | NA           | CUFF.1204 | NA           | u       | TSS8831   | 7.632E-32 |
| chr8 | TCONS_00096678 | XLOC_083228 | 3174540  | 3174746  | - | 1 | OS08G0155100 | CUFF.1544 | OS08T01551(i | TSS8835 | 1.25E-16  |           |
| chr8 | TCONS_00096679 | XLOC_083237 | 3281606  | 3281846  | - | 1 | OS08G0156600 | CUFF.1544 | OS08T01566(i | TSS8836 | 2.064E-44 |           |
| chr8 | TCONS_00093572 | XLOC_083250 | 3368649  | 3369030  | - | 1 | OS08G0157600 | CUFF.1211 | OS08T01576(i | TSS8838 | 0         |           |
| chr8 | TCONS_00093573 | XLOC_083251 | 3373571  | 3373788  | - | 1 | NA           | CUFF.1208 | NA           | u       | TSS8838   | 3.658E-47 |
| chr8 | TCONS_00093653 | XLOC_083325 | 3859094  | 3859731  | - | 1 | OS08G0166400 | CUFF.1210 | OS08T01664(x | TSS8846 | 6.775E-44 |           |
| chr8 | TCONS_00093692 | XLOC_083363 | 4121531  | 4121749  | - | 1 | NA           | CUFF.1211 | NA           | u       | TSS8850   | 4.11E-79  |
| chr8 | TCONS_00093741 | XLOC_083412 | 4443123  | 4443345  | - | 1 | NA           | CUFF.1213 | NA           | u       | TSS8856   | 1.39E-44  |
| chr8 | TCONS_00096699 | XLOC_083413 | 4444123  | 4444355  | - | 1 | NA           | CUFF.1552 | NA           | u       | TSS8856   | 3.51E-47  |
| chr8 | TCONS_00096705 | XLOC_083451 | 4690320  | 4690523  | - | 1 | NA           | CUFF.1555 | NA           | u       | TSS8860   | 6.174E-32 |
| chr8 | TCONS_00093787 | XLOC_083453 | 4691485  | 4692264  | - | 1 | NCRNA_2645   | CUFF.1215 | NCRNA_264:x  | TSS8861 | 0         |           |
| chr8 | TCONS_00096706 | XLOC_083454 | 4692350  | 4692573  | - | 1 | NA           | CUFF.1555 | NA           | u       | TSS8861   | 0.0001868 |
| chr8 | TCONS_00093810 | XLOC_083477 | 4949999  | 4950374  | - | 1 | OS08G0184300 | CUFF.1216 | OS08T01843(i | TSS8863 | 3.091E-19 |           |
| chr8 | TCONS_00096709 | XLOC_083486 | 5028415  | 5028869  | - | 1 | OS08G0185701 | CUFF.1557 | OS08T01857(i | TSS8864 | 1.383E-09 |           |
| chr8 | TCONS_00096710 | XLOC_083487 | 5029007  | 5029653  | - | 1 | OS08G0185701 | CUFF.1557 | OS08T01857(x | TSS8864 | 3.802E-12 |           |
| chr8 | TCONS_00093818 | XLOC_083488 | 5031744  | 5032186  | - | 1 | NA           | CUFF.1216 | NA           | u       | TSS8864   | 3.935E-46 |
| chr8 | TCONS_00093904 | XLOC_083568 | 5681592  | 5681834  | - | 1 | OS08G0198300 | CUFF.1219 | OS08T01983(i | TSS8873 | 2.306E-10 |           |
| chr8 | TCONS_00096717 | XLOC_083572 | 5731637  | 5731839  | - | 1 | NA           | CUFF.1561 | NA           | u       | TSS8873   | 6.268E-22 |
| chr8 | TCONS_00093926 | XLOC_083592 | 5900535  | 5900749  | - | 1 | NA           | CUFF.1220 | NA           | u       | TSS8875   | 1.484E-54 |

|      |                |             |          |          |   |   |              |                        |         |           |           |
|------|----------------|-------------|----------|----------|---|---|--------------|------------------------|---------|-----------|-----------|
| chr8 | TCONS_00093936 | XLOC_083603 | 5999864  | 6000077  | - | 1 | OS08G0203300 | CUFF.1220 OS08T02033(x | TSS8876 | 4.864E-54 |           |
| chr8 | TCONS_00093965 | XLOC_083630 | 6232557  | 6232928  | - | 1 | NA           | CUFF.1222 NA           | u       | TSS8879   | 2.074E-19 |
| chr8 | TCONS_00096724 | XLOC_083630 | 6231512  | 6232583  | - | 1 | NA           | CUFF.1563 NA           | u       | TSS8879   | 0         |
| chr8 | TCONS_00096726 | XLOC_083631 | 6233296  | 6233503  | - | 1 | NA           | CUFF.1563 NA           | u       | TSS8880   | 1.033E-24 |
| chr8 | TCONS_00096735 | XLOC_083728 | 7510605  | 7510810  | - | 1 | NA           | CUFF.1566 NA           | u       | TSS8890   | 1.217E-41 |
| chr8 | TCONS_00096739 | XLOC_083816 | 8267650  | 8267852  | - | 1 | NA           | CUFF.1568 NA           | u       | TSS8899   | 6.268E-22 |
| chr8 | TCONS_00096746 | XLOC_083845 | 8582718  | 8582919  | - | 1 | OS08G0241400 | CUFF.1570 OS08T02414(x | TSS8902 | 1.387E-18 |           |
| chr8 | TCONS_00094183 | XLOC_083858 | 8706751  | 8706959  | - | 1 | OS08G0243100 | CUFF.1226 OS08T02431(i | TSS8903 | 1.417E-83 |           |
| chr8 | TCONS_00096747 | XLOC_083859 | 8707235  | 8707556  | - | 1 | OS08G0243100 | CUFF.1570 OS08T02431(i | TSS8903 | 7.218E-70 |           |
| chr8 | TCONS_00096749 | XLOC_083888 | 8966747  | 8967222  | - | 1 | OS08G0246700 | CUFF.1571 OS08T02467(x | TSS8906 | 6.57E-17  |           |
| chr8 | TCONS_00096750 | XLOC_083889 | 8967276  | 8967467  | - | 1 | NA           | CUFF.1571 NA           | u       | TSS8906   | 5.669E-07 |
| chr8 | TCONS_00094215 | XLOC_083890 | 8968125  | 8968903  | - | 1 | NA           | CUFF.1227 NA           | u       | TSS8907   | 4.024E-14 |
| chr8 | TCONS_00096752 | XLOC_083890 | 8968645  | 8969013  | - | 1 | NA           | CUFF.1571 NA           | u       | TSS8907   | 9.335E-24 |
| chr8 | TCONS_00094228 | XLOC_083903 | 9099085  | 9099414  | - | 1 | OS08G0249000 | CUFF.1227 OS08T02490(x | TSS8908 | 3.646E-75 |           |
| chr8 | TCONS_00096756 | XLOC_083940 | 9383041  | 9383250  | - | 1 | NA           | CUFF.1572 NA           | u       | TSS8912   | 3.674E-78 |
| chr8 | TCONS_00094349 | XLOC_084024 | 10265144 | 10265389 | - | 1 | NA           | CUFF.1229 NA           | u       | TSS8920   | 1.594E-22 |
| chr8 | TCONS_00094370 | XLOC_084044 | 10457603 | 10457805 | - | 1 | NA           | CUFF.1230 NA           | u       | TSS8922   | 0         |
| chr8 | TCONS_00096763 | XLOC_084059 | 10592891 | 10593123 | - | 1 | OS08G0275200 | CUFF.1575 OS08T02752(x | TSS8924 | 1.72E-32  |           |
| chr8 | TCONS_00094398 | XLOC_084076 | 10763439 | 10763676 | - | 1 | NA           | CUFF.1231 NA           | u       | TSS8925   | 1.979E-29 |
| chr8 | TCONS_00096764 | XLOC_084117 | 11271386 | 11271588 | - | 1 | NA           | CUFF.1577 NA           | u       | TSS8930   | 3.311E-37 |
| chr8 | TCONS_00096765 | XLOC_084138 | 11489862 | 11490339 | - | 1 | OS08G0289000 | CUFF.1577 OS08T02890(i | TSS8932 | 6.174E-32 |           |
| chr8 | TCONS_00096769 | XLOC_084209 | 12269447 | 12269650 | - | 1 | MGD2         | CUFF.1579 OS08T02994(x | TSS8939 | 2.859E-30 |           |
| chr8 | TCONS_00094537 | XLOC_084213 | 12314750 | 12315061 | - | 1 | OS08G0300100 | CUFF.1235 OS08T03001(x | TSS8939 | 1.524E-18 |           |
| chr8 | TCONS_00096771 | XLOC_084249 | 12797819 | 12798124 | - | 1 | NCRNA_1524   | CUFF.1580 NCRNA_152.x  | TSS8943 | 2.869E-25 |           |
| chr8 | TCONS_00094576 | XLOC_084251 | 12843220 | 12843690 | - | 1 | NA           | CUFF.1236 NA           | u       | TSS8943   | 0         |
| chr8 | TCONS_00096772 | XLOC_084252 | 12843770 | 12844808 | - | 1 | NA           | CUFF.1580 NA           | u       | TSS8943   | 0.0002136 |
| chr8 | TCONS_00096773 | XLOC_084256 | 12881846 | 12882481 | - | 1 | OS08G0307601 | CUFF.1581 OS08T03076(i | TSS8944 | 9.337E-33 |           |
| chr8 | TCONS_00094612 | XLOC_084286 | 13476261 | 13476484 | - | 1 | OS08G0314800 | CUFF.1238 OS08T03148(x | TSS8947 | 6.037E-51 |           |
| chr8 | TCONS_00096776 | XLOC_084287 | 13476515 | 13476717 | - | 1 | OS08G0314800 | CUFF.1583 OS08T03148(x | TSS8947 | 3.311E-37 |           |
| chr8 | TCONS_00096777 | XLOC_084288 | 13482867 | 13483696 | - | 1 | NA           | CUFF.1582 NA           | u       | TSS8947   | 2.577E-56 |
| chr8 | TCONS_00096778 | XLOC_084289 | 13487068 | 13487390 | - | 1 | NA           | CUFF.1582 NA           | u       | TSS8947   | 2.863E-13 |
| chr8 | TCONS_00096781 | XLOC_084327 | 14058324 | 14058525 | - | 1 | OS08G0322500 | CUFF.1584 OS08T03225(x | TSS8951 | 1.387E-18 |           |
| chr8 | TCONS_00094675 | XLOC_084350 | 14336062 | 14336291 | - | 1 | OS08G0326300 | CUFF.1239 OS08T03263(i | TSS8954 | 2.741E-25 |           |
| chr8 | TCONS_00096787 | XLOC_084384 | 14752625 | 14753212 | - | 1 | NA           | CUFF.1587 NA           | u       | TSS8957   | 0.0092405 |
| chr8 | TCONS_00096788 | XLOC_084385 | 14753583 | 14754487 | - | 1 | NA           | CUFF.1586 NA           | u       | TSS8958   | 1.876E-47 |

|      |                |             |          |          |   |   |              |           |              |   |         |           |
|------|----------------|-------------|----------|----------|---|---|--------------|-----------|--------------|---|---------|-----------|
| chr8 | TCONS_00094717 | XLOC_084386 | 14755240 | 14755961 | - | 1 | NA           | CUFF.1241 | NA           | u | TSS8958 | 0.41415   |
| chr8 | TCONS_00094737 | XLOC_084408 | 15098725 | 15098931 | - | 1 | NA           | CUFF.1242 | NA           | u | TSS8960 | 4.529E-55 |
| chr8 | TCONS_00096795 | XLOC_084431 | 15274658 | 15274996 | - | 1 | OS08G0339200 | CUFF.1589 | OS08T03392(i |   | TSS8963 | 4.257E-36 |
| chr8 | TCONS_00094773 | XLOC_084444 | 15494788 | 15495027 | - | 1 | OS08G0343300 | CUFF.1243 | OS08T03433(i |   | TSS8964 | 1.441E-28 |
| chr8 | TCONS_00096799 | XLOC_084454 | 15641096 | 15641303 | - | 1 | OS08G0345400 | CUFF.1589 | OS08T03454(x |   | TSS8965 | 1.063E-19 |
| chr8 | TCONS_00096800 | XLOC_084462 | 15701833 | 15702118 | - | 1 | OS08G0346400 | CUFF.1590 | OS08T03464(i |   | TSS8966 | 7.187E-39 |
| chr8 | TCONS_00094987 | XLOC_084652 | 17845404 | 17845746 | - | 1 | NA           | CUFF.1246 | NA           | u | TSS8986 | 1.839E-35 |
| chr8 | TCONS_00096809 | XLOC_084652 | 17845139 | 17845426 | - | 1 | NA           | CUFF.1594 | NA           | u | TSS8986 | 1.051E-25 |
| chr8 | TCONS_00096813 | XLOC_084689 | 18192380 | 18192606 | - | 1 | OS08G0385900 | CUFF.1596 | OS08T03859(x |   | TSS8990 | 0.32489   |
| chr8 | TCONS_00095032 | XLOC_084699 | 18264471 | 18264718 | - | 1 | NA           | CUFF.1248 | NA           | u | TSS8991 | 1.737E-09 |
| chr8 | TCONS_00096816 | XLOC_084712 | 18349793 | 18350069 | - | 1 | OS08G0388300 | CUFF.1597 | OS08T03883(i |   | TSS8992 | 7.056E-24 |
| chr8 | TCONS_00096817 | XLOC_084713 | 18351721 | 18351976 | - | 1 | OS08G0388300 | CUFF.1597 | OS08T03883(i |   | TSS8992 | 1.027E-29 |
| chr8 | TCONS_00095055 | XLOC_084722 | 18454874 | 18455287 | - | 1 | OS08G0389700 | CUFF.1251 | OS08T03897(i |   | TSS8993 | 4.891E-49 |
| chr8 | TCONS_00096821 | XLOC_084771 | 19012466 | 19012737 | - | 1 | OS08G0398400 | CUFF.1600 | OS08T03984(i |   | TSS8999 | 1.947E-29 |
| chr8 | TCONS_00096822 | XLOC_084772 | 19014835 | 19015097 | - | 1 | OS08G0398400 | CUFF.1600 | OS08T03984(i |   | TSS8999 | 1.091E-44 |
| chr8 | TCONS_00096823 | XLOC_084780 | 19124983 | 19125362 | - | 1 | OS08G0400800 | CUFF.1600 | OS08T04008(x |   | TSS9000 | 3.907E-44 |
| chr8 | TCONS_00095129 | XLOC_084794 | 19207727 | 19208008 | - | 1 | OS08G0402500 | CUFF.1252 | OS08T04025(x |   | TSS9001 | 3.68E-56  |
| chr8 | TCONS_00096831 | XLOC_084847 | 19581440 | 19581809 | - | 1 | TPP6         | CUFF.1602 | OS08T04091(i |   | TSS9006 | 2.529E-33 |
| chr8 | TCONS_00096833 | XLOC_084866 | 19730912 | 19731164 | - | 1 | OS08G0412401 | CUFF.1604 | OS08T04124(i |   | TSS9008 | 1.713E-27 |
| chr8 | TCONS_00095215 | XLOC_084881 | 19805703 | 19805922 | - | 1 | OS08G0414300 | CUFF.1255 | OS08T04143(i |   | TSS9010 | 1.736E-41 |
| chr8 | TCONS_00096836 | XLOC_084902 | 20089790 | 20090095 | - | 1 | NA           | CUFF.1604 | NA           | u | TSS9012 | 2.216E-26 |
| chr8 | TCONS_00096839 | XLOC_084913 | 20207718 | 20208165 | - | 1 | OS08G0421900 | CUFF.1605 | OS08T04219(x |   | TSS9014 | 1.643E-15 |
| chr8 | TCONS_00096844 | XLOC_084957 | 20601450 | 20601685 | - | 1 | OS08G0428200 | CUFF.1607 | OS08T04282(x |   | TSS9019 | 6.604E-06 |
| chr8 | TCONS_00096845 | XLOC_084977 | 20790770 | 20791098 | - | 1 | OS08G0430100 | CUFF.1608 | OS08T04301(i |   | TSS9021 | 3.453E-17 |
| chr8 | TCONS_00096846 | XLOC_084991 | 20848829 | 20849116 | - | 1 | OS08G0431100 | CUFF.1610 | OS08T04311(i |   | TSS9022 | 6.523E-60 |
| chr8 | TCONS_00096847 | XLOC_084992 | 20850515 | 20850826 | - | 1 | OS08G0431100 | CUFF.1610 | OS08T04311(i |   | TSS9023 | 2.859E-30 |
| chr8 | TCONS_00095338 | XLOC_084995 | 20876709 | 20876919 | - | 1 | NA           | CUFF.1257 | NA           | u | TSS9023 | 0         |
| chr8 | TCONS_00096849 | XLOC_084999 | 20895416 | 20895694 | - | 1 | OS08G0431800 | CUFF.1610 | OS08T04318(i |   | TSS9023 | 5.592E-20 |
| chr8 | TCONS_00096851 | XLOC_085050 | 21338381 | 21338774 | - | 1 | OS08G0439100 | CUFF.1611 | OS08T04391(i |   | TSS9029 | 2.638E-18 |
| chr8 | TCONS_00095397 | XLOC_085051 | 21341560 | 21341895 | - | 1 | OS08G0439100 | CUFF.1260 | OS08T04391(i |   | TSS9029 | 8.039E-75 |
| chr8 | TCONS_00096853 | XLOC_085054 | 21359610 | 21359974 | - | 1 | OS08G0439200 | CUFF.1611 | OS08T04392(x |   | TSS9029 | 3.405E-06 |
| chr8 | TCONS_00095417 | XLOC_085069 | 21527527 | 21527745 | - | 1 | NA           | CUFF.1260 | NA           | u | TSS9031 | 2.137E-60 |
| chr8 | TCONS_00095436 | XLOC_085088 | 21727843 | 21728052 | - | 1 | NA           | CUFF.1260 | NA           | u | TSS9032 | 0         |
| chr8 | TCONS_00095454 | XLOC_085106 | 21885255 | 21885507 | - | 1 | OS08G0448100 | CUFF.1261 | OS08T04481(x |   | TSS9034 | 0         |
| chr8 | TCONS_00096855 | XLOC_085107 | 21885890 | 21886295 | - | 1 | NA           | CUFF.1612 | NA           | u | TSS9034 | 2.869E-25 |

|      |                |             |          |          |   |   |              |           |              |   |         |           |
|------|----------------|-------------|----------|----------|---|---|--------------|-----------|--------------|---|---------|-----------|
| chr8 | TCONS_00095455 | XLOC_085108 | 21886764 | 21887060 | - | 1 | NA           | CUFF.1261 | NA           | u | TSS9034 | 0.46406   |
| chr8 | TCONS_00096856 | XLOC_085108 | 21886701 | 21886965 | - | 1 | NA           | CUFF.1612 | NA           | u | TSS9034 | 1.387E-18 |
| chr8 | TCONS_00095456 | XLOC_085109 | 21887614 | 21887878 | - | 1 | NA           | CUFF.1261 | NA           | u | TSS9035 | 0         |
| chr8 | TCONS_00095457 | XLOC_085110 | 21901913 | 21902130 | - | 1 | NA           | CUFF.1261 | NA           | u | TSS9035 | 7.713E-07 |
| chr8 | TCONS_00095468 | XLOC_085120 | 22010272 | 22010473 | - | 1 | OS08G0450800 | CUFF.1262 | OS08T04508(i |   | TSS9036 | 2.588E-21 |
| chr8 | TCONS_00095481 | XLOC_085132 | 22063328 | 22063689 | - | 1 | OS08G0451500 | CUFF.1263 | OS08T04515(i |   | TSS9037 | 3.105E-40 |
| chr8 | TCONS_00096861 | XLOC_085132 | 22063443 | 22063756 | - | 1 | OS08G0451500 | CUFF.1615 | OS08T04515(i |   | TSS9037 | 6.524E-05 |
| chr8 | TCONS_00096863 | XLOC_085141 | 22190629 | 22190830 | - | 1 | OS08G0453200 | CUFF.1615 | OS08T04532(i |   | TSS9038 | 1.616E-25 |
| chr8 | TCONS_00095506 | XLOC_085156 | 22323542 | 22324201 | - | 1 | NA           | CUFF.1264 | NA           | u | TSS9040 | 1.749E-10 |
| chr8 | TCONS_00096866 | XLOC_085163 | 22354644 | 22354888 | - | 1 | NA           | CUFF.1616 | NA           | u | TSS9040 | 9.382E-30 |
| chr8 | TCONS_00096873 | XLOC_085269 | 23273923 | 23274244 | - | 1 | OS08G0472600 | CUFF.1620 | OS08T04726(i |   | TSS9051 | 2.514E-28 |
| chr8 | TCONS_00095619 | XLOC_085270 | 23277335 | 23277540 | - | 1 | OS08G0472600 | CUFF.1266 | OS08T04726(x |   | TSS9051 | 0         |
| chr8 | TCONS_00095628 | XLOC_085279 | 23394358 | 23394700 | - | 1 | OS08G0474700 | CUFF.1267 | OS08T04747(i |   | TSS9052 | 1.029E-10 |
| chr8 | TCONS_00096875 | XLOC_085285 | 23417675 | 23418251 | - | 1 | NA           | CUFF.1619 | NA           | u | TSS9053 | 0.3772    |
| chr8 | TCONS_00096878 | XLOC_085315 | 23713432 | 23714362 | - | 1 | OS08G0480000 | CUFF.1623 | OS08T04800(x |   | TSS9056 | 5.961E-15 |
| chr8 | TCONS_00096879 | XLOC_085316 | 23714574 | 23715138 | - | 1 | OS08G0480000 | CUFF.1623 | OS08T04800(x |   | TSS9056 | 4.358E-41 |
| chr8 | TCONS_00096883 | XLOC_085346 | 23992436 | 23992704 | - | 1 | OS08G0485400 | CUFF.1624 | OS08T04854(i |   | TSS9059 | 1.859E-10 |
| chr8 | TCONS_00096888 | XLOC_085358 | 24036904 | 24037218 | - | 1 | OS08G0486100 | CUFF.1623 | OS08T04861(x |   | TSS9060 | 2.925E-42 |
| chr8 | TCONS_00096891 | XLOC_085398 | 24326800 | 24327173 | - | 1 | OS08G0492400 | CUFF.1624 | OS08T04924(i |   | TSS9064 | 3.102E-07 |
| chr8 | TCONS_00096900 | XLOC_085424 | 24563503 | 24563704 | - | 1 | OS08G0497300 | CUFF.1626 | OS08T04973(x |   | TSS9067 | 3.258E-32 |
| chr8 | TCONS_00096901 | XLOC_085425 | 24576813 | 24577037 | - | 1 | OS08G0497600 | CUFF.1626 | OS08T04976(i |   | TSS9067 | 2.113E-62 |
| chr8 | TCONS_00096903 | XLOC_085439 | 24669561 | 24669761 | - | 1 | OS08G0499700 | CUFF.1626 | OS08T04997(i |   | TSS9069 | 3.301E-22 |
| chr8 | TCONS_00096904 | XLOC_085441 | 24685888 | 24686432 | - | 1 | OS08G0500100 | CUFF.1626 | OS08T05001(i |   | TSS9069 | 1.815E-17 |
| chr8 | TCONS_00096906 | XLOC_085471 | 24867139 | 24867491 | - | 1 | OS08G0503200 | CUFF.1629 | OS08T05032(x |   | TSS9072 | 2.469E-51 |
| chr8 | TCONS_00095829 | XLOC_085486 | 24956358 | 24956670 | - | 1 | NA           | CUFF.1272 | NA           | u | TSS9074 | 4.11E-79  |
| chr8 | TCONS_00095830 | XLOC_085487 | 24957158 | 24957364 | - | 1 | NA           | CUFF.1272 | NA           | u | TSS9074 | 0         |
| chr8 | TCONS_00096911 | XLOC_085505 | 25126073 | 25126355 | - | 1 | NA           | CUFF.1628 | NA           | u | TSS9076 | 7.972E-26 |
| chr8 | TCONS_00095856 | XLOC_085514 | 25244109 | 25244457 | - | 1 | CM-LOX2      | CUFF.1276 | OS08T05091(i |   | TSS9077 | 7.659E-27 |
| chr8 | TCONS_00096919 | XLOC_085548 | 25464135 | 25464662 | - | 1 | NA           | CUFF.1630 | NA           | u | TSS9081 | 4.293E-21 |
| chr8 | TCONS_00095892 | XLOC_085552 | 25466746 | 25466974 | - | 1 | NA           | CUFF.1274 | NA           | u | TSS9081 | 8.77E-09  |
| chr8 | TCONS_00095894 | XLOC_085553 | 25467495 | 25467837 | - | 1 | OS08G0513600 | CUFF.1631 | OS08T05136(x |   | TSS9081 | 0.61243   |
| chr8 | TCONS_00095895 | XLOC_085554 | 25468674 | 25468892 | - | 1 | NA           | CUFF.1274 | NA           | u | TSS9081 | 2.395E-42 |
| chr8 | TCONS_00095954 | XLOC_085607 | 25832462 | 25832958 | - | 1 | OS08G0519700 | CUFF.1634 | OS08T05197(i |   | TSS9087 | 2.404E-11 |
| chr8 | TCONS_00096937 | XLOC_085609 | 25842151 | 25842362 | - | 1 | OS08G0519800 | CUFF.1633 | OS08T05198(i |   | TSS9087 | 3.311E-37 |
| chr8 | TCONS_00095971 | XLOC_085626 | 25940758 | 25940964 | - | 1 | OS08G0521400 | CUFF.1277 | OS08T05214(i |   | TSS9089 | 1.114E-75 |



|      |                |             |          |          |   |   |              |                        |         |           |
|------|----------------|-------------|----------|----------|---|---|--------------|------------------------|---------|-----------|
| chr8 | TCONS_00096939 | XLOC_085627 | 25941397 | 25941599 | - | 1 | OS08G0521400 | CUFF.1635 OS08T05214(i | TSS9089 | 7.656E-49 |
| chr8 | TCONS_00096940 | XLOC_085633 | 25982058 | 25982262 | - | 1 | OS08G0522600 | CUFF.1634 OS08T05226(i | TSS9090 | 5.476E-35 |
| chr8 | TCONS_00095984 | XLOC_085642 | 26025993 | 26026249 | - | 1 | OS08G0523600 | CUFF.1277 OS08T05236(x | TSS9091 | 2.325E-27 |
| chr8 | TCONS_00095994 | XLOC_085653 | 26091769 | 26091971 | - | 1 | OS08G0524501 | CUFF.1278 OS08T05245(i | TSS9092 | 0         |
| chr8 | TCONS_00096944 | XLOC_085665 | 26178200 | 26178543 | - | 1 | OS08G0526300 | CUFF.1636 OS08T05263(i | TSS9093 | 1.739E-22 |
| chr8 | TCONS_00096009 | XLOC_085666 | 26182984 | 26183299 | - | 1 | OS08G0526300 | CUFF.1279 OS08T05263(i | TSS9094 | 6.816E-66 |
| chr8 | TCONS_00096945 | XLOC_085666 | 26182862 | 26183103 | - | 1 | OS08G0526300 | CUFF.1636 OS08T05263(i | TSS9093 | 6.641E-47 |
| chr8 | TCONS_00096031 | XLOC_085688 | 26327323 | 26327523 | - | 1 | OS08G0528900 | CUFF.1279 OS08T05289(i | TSS9096 | 0         |
| chr8 | TCONS_00096050 | XLOC_085706 | 26506412 | 26506615 | - | 1 | NA           | CUFF.1279 NA u         | TSS9098 | 1.54E-48  |
| chr8 | TCONS_00096949 | XLOC_085739 | 26754208 | 26754507 | - | 1 | OS08G0535700 | CUFF.1638 OS08T05357(x | TSS9101 | 0.024257  |
| chr8 | TCONS_00096950 | XLOC_085742 | 26768209 | 26768423 | - | 1 | OS08G0535800 | CUFF.1639 OS08T05358(i | TSS9101 | 3.839E-19 |
| chr8 | TCONS_00096952 | XLOC_085746 | 26788788 | 26789192 | - | 1 | OS08G0536100 | CUFF.1639 OS08T05361(x | TSS9102 | 0         |
| chr8 | TCONS_00096954 | XLOC_085766 | 26910029 | 26910264 | - | 1 | OS08G0538300 | CUFF.1640 OS08T05383(i | TSS9104 | 7.959E-31 |
| chr8 | TCONS_00096126 | XLOC_085780 | 27047950 | 27048313 | - | 1 | OS08G0540300 | CUFF.1282 OS08T05403(i | TSS9105 | 5.585E-13 |
| chr8 | TCONS_00096956 | XLOC_085793 | 27133857 | 27134174 | - | 1 | NA           | CUFF.1640 NA u         | TSS9106 | 1.713E-27 |
| chr8 | TCONS_00096181 | XLOC_085834 | 27401342 | 27401549 | - | 1 | NA           | CUFF.1283 NA u         | TSS9111 | 3.528E-87 |
| chr8 | TCONS_00096194 | XLOC_085846 | 27501324 | 27501542 | - | 1 | NA           | CUFF.1283 NA u         | TSS9112 | 3.781E-52 |
| chr8 | TCONS_00096967 | XLOC_085910 | 27941892 | 27942093 | - | 1 | OS08G0558300 | CUFF.1646 OS08T05583(x | TSS9119 | 1.562E-40 |
| chr8 | TCONS_00096314 | XLOC_085959 | 28302692 | 28302893 | - | 1 | OS08G0564800 | CUFF.1288 OS08T05648(i | TSS9124 | 0         |
| chr9 | TCONS_00097040 | XLOC_086048 | 678155   | 678363   | + | 1 | NA           | CUFF.1288 NA u         | TSS9133 | 0         |
| chr9 | TCONS_00097041 | XLOC_086051 | 709414   | 709846   | + | 1 | NA           | CUFF.1288 NA u         | TSS9134 | 7.436E-14 |
| chr9 | TCONS_00102280 | XLOC_086055 | 722286   | 722686   | + | 1 | NA           | CUFF.1653 NA u         | TSS9134 | 2.36E-34  |
| chr9 | TCONS_00102281 | XLOC_086056 | 723422   | 723627   | + | 1 | NA           | CUFF.1652 NA u         | TSS9134 | 5.443E-25 |
| chr9 | TCONS_00102284 | XLOC_086059 | 725723   | 726204   | + | 1 | NA           | CUFF.1653 NA u         | TSS9135 | 8.198E-17 |
| chr9 | TCONS_00097055 | XLOC_086067 | 858880   | 859096   | + | 1 | OS09G0109500 | CUFF.1289 OS09T01095(i | TSS9136 | 0         |
| chr9 | TCONS_00102285 | XLOC_086080 | 997687   | 997933   | + | 1 | OS09G0112100 | CUFF.1654 OS09T01121(x | TSS9137 | 2.647E-43 |
| chr9 | TCONS_00097100 | XLOC_086106 | 1239764  | 1240002  | + | 1 | NA           | CUFF.1290 NA u         | TSS9140 | 6.15E-12  |
| chr9 | TCONS_00097124 | XLOC_086131 | 1614131  | 1614334  | + | 1 | OS09G0120800 | CUFF.1291 OS09T01208(i | TSS9143 | 4.28E-67  |
| chr9 | TCONS_00102296 | XLOC_086153 | 1887826  | 1888062  | + | 1 | NA           | CUFF.1656 NA u         | TSS9145 | 5.772E-84 |
| chr9 | TCONS_00102302 | XLOC_086196 | 2403235  | 2403734  | + | 1 | OS09G0131400 | CUFF.1659 OS09T01314(x | TSS9150 | 4.62E-12  |
| chr9 | TCONS_00097218 | XLOC_086226 | 2912135  | 2912375  | + | 1 | NA           | CUFF.1294 NA u         | TSS9153 | 8.942E-30 |
| chr9 | TCONS_00097228 | XLOC_086236 | 3057084  | 3057324  | + | 1 | OS09G0240200 | CUFF.1294 OS09T02402(i | TSS9154 | 0         |
| chr9 | TCONS_00097229 | XLOC_086237 | 3061539  | 3061746  | + | 1 | OS09G0240200 | CUFF.1295 OS09T02402(i | TSS9154 | 0         |
| chr9 | TCONS_00102305 | XLOC_086254 | 3196005  | 3196281  | + | 1 | NA           | CUFF.1660 NA u         | TSS9156 | 1.856E-14 |
| chr9 | TCONS_00097280 | XLOC_086291 | 3592051  | 3592870  | + | 1 | NCRNA_10050  | CUFF.1295 NCRNA_100:x  | TSS9159 | 3.07E-53  |

|      |                |             |          |          |   |   |              |                        |   |         |           |
|------|----------------|-------------|----------|----------|---|---|--------------|------------------------|---|---------|-----------|
| chr9 | TCONS_00097283 | XLOC_086292 | 3595061  | 3595485  | + | 1 | NA           | CUFF.1295 NA           | u | TSS9160 | 4.087E-16 |
| chr9 | TCONS_00102314 | XLOC_086295 | 3598473  | 3598995  | + | 1 | NA           | CUFF.1663 NA           | u | TSS9160 | 1.091E-83 |
| chr9 | TCONS_00097292 | XLOC_086299 | 3604062  | 3604303  | + | 1 | NA           | CUFF.1296 NA           | u | TSS9161 | 7.436E-14 |
| chr9 | TCONS_00102317 | XLOC_086299 | 3604251  | 3604725  | + | 1 | NA           | CUFF.1662 NA           | u | TSS9161 | 3.222E-30 |
| chr9 | TCONS_00097294 | XLOC_086300 | 3604756  | 3605498  | + | 1 | NA           | CUFF.1296 NA           | u | TSS9161 | 0         |
| chr9 | TCONS_00097420 | XLOC_086422 | 4706161  | 4708267  | + | 1 | OS09G0263474 | CUFF.1302 OS09T0263474 | x | TSS9174 | 2.633E-07 |
| chr9 | TCONS_00102330 | XLOC_086423 | 4708328  | 4708636  | + | 1 | NA           | CUFF.1668 NA           | u | TSS9174 | 1.549E-20 |
| chr9 | TCONS_00102341 | XLOC_086539 | 6097936  | 6098319  | + | 1 | NA           | CUFF.1672 NA           | u | TSS9186 | 1.307E-09 |
| chr9 | TCONS_00097701 | XLOC_086701 | 7928034  | 7928274  | + | 1 | OS09G0306800 | CUFF.1309 OS09T0306800 | x | TSS9203 | 7.189E-23 |
| chr9 | TCONS_00097735 | XLOC_086736 | 8347173  | 8347480  | + | 1 | NA           | CUFF.1309 NA           | u | TSS9207 | 0         |
| chr9 | TCONS_00102352 | XLOC_086736 | 8347238  | 8347684  | + | 1 | NA           | CUFF.1679 NA           | u | TSS9207 | 2.04E-06  |
| chr9 | TCONS_00102355 | XLOC_086759 | 8654819  | 8655471  | + | 1 | NA           | CUFF.1682 NA           | u | TSS9209 | 3.796E-39 |
| chr9 | TCONS_00102360 | XLOC_086802 | 9319497  | 9319699  | + | 1 | NA           | CUFF.1681 NA           | u | TSS9213 | 1.339E-23 |
| chr9 | TCONS_00097829 | XLOC_086830 | 9515195  | 9515438  | + | 1 | OS09G0325000 | CUFF.1311 OS09T0325000 | i | TSS9216 | 1.524E-18 |
| chr9 | TCONS_00102362 | XLOC_086850 | 9664451  | 9664691  | + | 1 | OS09G0327550 | CUFF.1683 OS09T0327550 | x | TSS9219 | 1.959E-24 |
| chr9 | TCONS_00102363 | XLOC_086852 | 9671036  | 9671308  | + | 1 | NA           | CUFF.1683 NA           | u | TSS9219 | 1.508E-30 |
| chr9 | TCONS_00097855 | XLOC_086853 | 9671712  | 9672164  | + | 1 | NA           | CUFF.1312 NA           | u | TSS9219 | 4.174E-37 |
| chr9 | TCONS_00097946 | XLOC_086938 | 10545714 | 10545949 | + | 1 | OS09G0342000 | CUFF.1313 OS09T0342000 | x | TSS9228 | 7.473E-35 |
| chr9 | TCONS_00102368 | XLOC_086955 | 10772071 | 10772357 | + | 1 | OS09G0345000 | CUFF.1686 OS09T0345000 | i | TSS9230 | 1.991E-12 |
| chr9 | TCONS_00102374 | XLOC_087072 | 12032506 | 12032735 | + | 1 | OS09G0365900 | CUFF.1690 OS09T0365900 | x | TSS9242 | 2.139E-49 |
| chr9 | TCONS_00102375 | XLOC_087074 | 12033295 | 12033548 | + | 1 | OS09G0365900 | CUFF.1691 OS09T0365900 | x | TSS9242 | 4.685E-77 |
| chr9 | TCONS_00102376 | XLOC_087075 | 12033624 | 12033918 | + | 1 | OS09G0365900 | CUFF.1691 OS09T0365900 | x | TSS9242 | 2.863E-13 |
| chr9 | TCONS_00098159 | XLOC_087143 | 12643858 | 12644232 | + | 1 | NA           | CUFF.1319 NA           | u | TSS9249 | 7.713E-07 |
| chr9 | TCONS_00102384 | XLOC_087144 | 12644243 | 12646082 | + | 1 | OS09G0376800 | CUFF.1694 OS09T0376800 | x | TSS9249 | 3.027E-63 |
| chr9 | TCONS_00102385 | XLOC_087145 | 12648632 | 12649425 | + | 1 | OS09G0376800 | CUFF.1694 OS09T0376800 | i | TSS9249 | 1.61E-45  |
| chr9 | TCONS_00102388 | XLOC_087156 | 12782105 | 12782455 | + | 1 | OS09G0379600 | CUFF.1692 OS09T0379600 | x | TSS9250 | 3.718E-24 |
| chr9 | TCONS_00098210 | XLOC_087197 | 13135560 | 13135936 | + | 1 | NA           | CUFF.1320 NA           | u | TSS9255 | 3.243E-23 |
| chr9 | TCONS_00102394 | XLOC_087198 | 13135940 | 13136150 | + | 1 | NA           | CUFF.1693 NA           | u | TSS9255 | 6.569E-08 |
| chr9 | TCONS_00098211 | XLOC_087199 | 13136289 | 13136571 | + | 1 | NA           | CUFF.1320 NA           | u | TSS9255 | 0.66514   |
| chr9 | TCONS_00102396 | XLOC_087200 | 13137938 | 13138457 | + | 1 | NA           | CUFF.1694 NA           | u | TSS9255 | 5.401E-32 |
| chr9 | TCONS_00102399 | XLOC_087212 | 13190306 | 13190662 | + | 1 | NA           | CUFF.1694 NA           | u | TSS9256 | 4.127E-14 |
| chr9 | TCONS_00102400 | XLOC_087230 | 13506225 | 13506449 | + | 1 | NA           | CUFF.1694 NA           | u | TSS9258 | 1.187E-36 |
| chr9 | TCONS_00098246 | XLOC_087239 | 13566453 | 13566685 | + | 1 | NA           | CUFF.1321 NA           | u | TSS9259 | 1.463E-23 |
| chr9 | TCONS_00098312 | XLOC_087304 | 14114987 | 14115196 | + | 1 | NA           | CUFF.1323 NA           | u | TSS9266 | 4.093E-62 |
| chr9 | TCONS_00102406 | XLOC_087306 | 14116900 | 14117230 | + | 1 | NA           | CUFF.1698 NA           | u | TSS9266 | 5.145E-74 |

|      |                |             |          |          |   |   |              |                        |         |           |
|------|----------------|-------------|----------|----------|---|---|--------------|------------------------|---------|-----------|
| chr9 | TCONS_00098338 | XLOC_087328 | 14455368 | 14455594 | + | 1 | OS09G0408600 | CUFF.1324 OS09T04086(i | TSS9268 | 3.451E-32 |
| chr9 | TCONS_00102412 | XLOC_087362 | 14691463 | 14691710 | + | 1 | OS09G0413500 | CUFF.1701 OS09T04135(x | TSS9272 | 7.959E-31 |
| chr9 | TCONS_00102413 | XLOC_087382 | 14952189 | 14952399 | + | 1 | NA           | CUFF.1702 NA u         | TSS9274 | 8.061E-36 |
| chr9 | TCONS_00102414 | XLOC_087387 | 14994460 | 14994691 | + | 1 | OS09G0417800 | CUFF.1702 OS09T04178(x | TSS9274 | 7.056E-24 |
| chr9 | TCONS_00098421 | XLOC_087407 | 15206841 | 15207047 | + | 1 | OS09G0421100 | CUFF.1327 OS09T04211(x | TSS9277 | 0         |
| chr9 | TCONS_00102417 | XLOC_087411 | 15253190 | 15255596 | + | 1 | OS09G0422000 | CUFF.1704 OS09T04220(x | TSS9277 | 1.15E-13  |
| chr9 | TCONS_00098440 | XLOC_087422 | 15354392 | 15354595 | + | 1 | MGD1         | CUFF.1327 OS09T04236(i | TSS9279 | 3.275E-54 |
| chr9 | TCONS_00102419 | XLOC_087429 | 15388553 | 15388973 | + | 1 | OS09G0424300 | CUFF.1704 OS09T04243(x | TSS9279 | 5.016E-18 |
| chr9 | TCONS_00102420 | XLOC_087435 | 15420733 | 15421086 | + | 1 | OS09G0425200 | CUFF.1704 OS09T04252(x | TSS9280 | 3.802E-12 |
| chr9 | TCONS_00102422 | XLOC_087493 | 15869044 | 15869260 | + | 1 | NA           | CUFF.1706 NA u         | TSS9286 | 1.549E-20 |
| chr9 | TCONS_00098570 | XLOC_087546 | 16336486 | 16336686 | + | 1 | OS09G0440300 | CUFF.1332 OS09T04403(x | TSS9292 | 0         |
| chr9 | TCONS_00102427 | XLOC_087549 | 16354811 | 16355119 | + | 1 | NA           | CUFF.1708 NA u         | TSS9292 | 0.0077427 |
| chr9 | TCONS_00102428 | XLOC_087564 | 16423257 | 16423730 | + | 1 | OS09G0442100 | CUFF.1709 OS09T04421(i | TSS9294 | 2.897E-27 |
| chr9 | TCONS_00102432 | XLOC_087616 | 16879118 | 16879326 | + | 1 | NA           | CUFF.1710 NA u         | TSS9299 | 2.02E-70  |
| chr9 | TCONS_00098669 | XLOC_087642 | 17002789 | 17003057 | + | 1 | OS09G0453400 | CUFF.1333 OS09T04534(x | TSS9302 | 0         |
| chr9 | TCONS_00098731 | XLOC_087702 | 17435724 | 17436118 | + | 1 | NA           | CUFF.1335 NA u         | TSS9308 | 1.479E-52 |
| chr9 | TCONS_00102439 | XLOC_087727 | 17647965 | 17648218 | + | 1 | OS09G0465500 | CUFF.1713 OS09T04655(i | TSS9311 | 9.228E-41 |
| chr9 | TCONS_00102445 | XLOC_087781 | 18101285 | 18101492 | + | 1 | NA           | CUFF.1715 NA u         | TSS9317 | 4.877E-38 |
| chr9 | TCONS_00102446 | XLOC_087782 | 18103419 | 18103620 | + | 1 | NA           | CUFF.1715 NA u         | TSS9317 | 6.57E-17  |
| chr9 | TCONS_00102447 | XLOC_087783 | 18105754 | 18105911 | + | 1 | NA           | CUFF.1716 NA u         | TSS9317 | 5.443E-25 |
| chr9 | TCONS_00102448 | XLOC_087784 | 18106122 | 18106336 | + | 1 | NA           | CUFF.1715 NA u         | TSS9317 | 1.692E-24 |
| chr9 | TCONS_00098840 | XLOC_087805 | 18307491 | 18307691 | + | 1 | OS09G0477900 | CUFF.1338 OS09T04779(i | TSS9319 | 0.04715   |
| chr9 | TCONS_00102451 | XLOC_087805 | 18307557 | 18307759 | + | 1 | NCRNA_4408   | CUFF.1718 NCRNA_440(x  | TSS9319 | 2.943E-20 |
| chr9 | TCONS_00102452 | XLOC_087806 | 18312752 | 18313360 | + | 1 | CSLE1        | CUFF.1718 OS09T04781(x | TSS9319 | 1.17E-31  |
| chr9 | TCONS_00102457 | XLOC_087891 | 18880219 | 18880424 | + | 1 | NA           | CUFF.1719 NA u         | TSS9328 | 5.443E-25 |
| chr9 | TCONS_00098933 | XLOC_087897 | 18940126 | 18940359 | + | 1 | NA           | CUFF.1340 NA u         | TSS9329 | 2.98E-24  |
| chr9 | TCONS_00098951 | XLOC_087916 | 19120570 | 19120841 | + | 1 | OS09G0493600 | CUFF.1341 OS09T04936(x | TSS9331 | 0.075834  |
| chr9 | TCONS_00102461 | XLOC_087917 | 19129020 | 19129330 | + | 1 | OS09G0493800 | CUFF.1720 OS09T04938(i | TSS9331 | 6.161E-27 |
| chr9 | TCONS_00102468 | XLOC_087953 | 19414164 | 19414399 | + | 1 | OS09G0501700 | CUFF.1721 OS09T05017(x | TSS9335 | 1.929E-52 |
| chr9 | TCONS_00102469 | XLOC_087954 | 19418774 | 19419064 | + | 1 | OS09G0502000 | CUFF.1722 OS09T05020(x | TSS9335 | 8.061E-36 |
| chr9 | TCONS_00098987 | XLOC_087956 | 19420096 | 19420381 | + | 1 | OS09G0502000 | CUFF.1722 OS09T05020(x | TSS9335 | 0         |
| chr9 | TCONS_00102471 | XLOC_087970 | 19504497 | 19504955 | + | 1 | OS09G0504700 | CUFF.1722 OS09T05047(i | TSS9336 | 0.0003574 |
| chr9 | TCONS_00099053 | XLOC_088011 | 19778374 | 19778582 | + | 1 | OS09G0509500 | CUFF.1344 OS09T05095(x | TSS9341 | 2.413E-81 |
| chr9 | TCONS_00099184 | XLOC_088140 | 20538577 | 20538800 | + | 1 | OS09G0525600 | CUFF.1346 OS09T05256(x | TSS9355 | 1.007E-43 |
| chr9 | TCONS_00102486 | XLOC_088145 | 20579143 | 20579343 | + | 1 | NA           | CUFF.1728 NA u         | TSS9355 | 1.387E-18 |

|      |                |             |          |          |   |   |              |                        |         |           |
|------|----------------|-------------|----------|----------|---|---|--------------|------------------------|---------|-----------|
| chr9 | TCONS_00099206 | XLOC_088161 | 20746192 | 20746412 | + | 1 | OS09G0529700 | CUFF.1347 OS09T05297(x | TSS9357 | 1.578E-37 |
| chr9 | TCONS_00099228 | XLOC_088181 | 20887821 | 20888044 | + | 1 | PRR95        | CUFF.1348 OS09T05324(i | TSS9359 | 2.147E-33 |
| chr9 | TCONS_00099239 | XLOC_088190 | 20949156 | 20949667 | + | 1 | NA           | CUFF.1349 NA u         | TSS9360 | 0.029675  |
| chr9 | TCONS_00102489 | XLOC_088190 | 20948372 | 20949214 | + | 1 | NA           | CUFF.1733 NA u         | TSS9360 | 1.027E-29 |
| chr9 | TCONS_00102490 | XLOC_088190 | 20949477 | 20949891 | + | 1 | NA           | CUFF.1731 NA u         | TSS9360 | 3.839E-19 |
| chr9 | TCONS_00102491 | XLOC_088191 | 20950224 | 20950528 | + | 1 | NA           | CUFF.1731 NA u         | TSS9360 | 1.996E-06 |
| chr9 | TCONS_00102493 | XLOC_088193 | 20951257 | 20951519 | + | 1 | NA           | CUFF.1731 NA u         | TSS9361 | 2.216E-26 |
| chr9 | TCONS_00102496 | XLOC_088196 | 20952516 | 20952831 | + | 1 | NA           | CUFF.1731 NA u         | TSS9361 | 6.604E-06 |
| chr9 | TCONS_00102499 | XLOC_088222 | 21131377 | 21131577 | + | 1 | NA           | CUFF.1732 NA u         | TSS9364 | 8.25E-41  |
| chr9 | TCONS_00102500 | XLOC_088235 | 21200797 | 21201256 | + | 1 | OS09G0538600 | CUFF.1733 OS09T05386(i | TSS9365 | 2.243E-26 |
| chr9 | TCONS_00099285 | XLOC_088240 | 21220408 | 21220614 | + | 1 | OS09G0538800 | CUFF.1351 OS09T05388(i | TSS9366 | 0.0001658 |
| chr9 | TCONS_00102508 | XLOC_088263 | 21332098 | 21332301 | + | 1 | OS09G0541500 | CUFF.1734 OS09T05415(i | TSS9368 | 6.161E-27 |
| chr9 | TCONS_00099307 | XLOC_088265 | 21343403 | 21343613 | + | 1 | OS09G0542000 | CUFF.1351 OS09T05420(x | TSS9368 | 7.057E-33 |
| chr9 | TCONS_00099308 | XLOC_088266 | 21350070 | 21350276 | + | 1 | OS09G0542100 | CUFF.1351 OS09T05421(i | TSS9369 | 2.232E-65 |
| chr9 | TCONS_00102509 | XLOC_088266 | 21349748 | 21350225 | + | 1 | OS09G0542100 | CUFF.1734 OS09T05421(x | TSS9368 | 2.514E-28 |
| chr9 | TCONS_00099375 | XLOC_088331 | 21774931 | 21775149 | + | 1 | OS09G0550500 | CUFF.1353 OS09T05505(i | TSS9376 | 2.081E-66 |
| chr9 | TCONS_00102523 | XLOC_088417 | 22352973 | 22353393 | + | 1 | OS09G0562700 | CUFF.1740 OS09T05627(x | TSS9385 | 1.912E-10 |
| chr9 | TCONS_00099491 | XLOC_088447 | 22571755 | 22571998 | + | 1 | OS09G0566100 | CUFF.1358 OS09T05661(i | TSS9388 | 1.159E-09 |
| chr9 | TCONS_00102526 | XLOC_088449 | 22579536 | 22580065 | + | 1 | NA           | CUFF.1742 NA u         | TSS9388 | 1.517E-26 |
| chr9 | TCONS_00102528 | XLOC_088451 | 22584091 | 22584476 | + | 1 | NA           | CUFF.1742 NA u         | TSS9388 | 3.301E-22 |
| chr9 | TCONS_00102529 | XLOC_088452 | 22584676 | 22584956 | + | 1 | NA           | CUFF.1742 NA u         | TSS9388 | 0.024257  |
| chr9 | TCONS_00099496 | XLOC_088454 | 22586676 | 22586878 | + | 1 | NA           | CUFF.1358 NA u         | TSS9389 | 0         |
| chr9 | TCONS_00099513 | XLOC_088471 | 22677846 | 22678065 | + | 1 | URH2         | CUFF.1359 OS09T05679(x | TSS9390 | 4.235E-45 |
| chr9 | TCONS_00102533 | XLOC_088483 | 22733676 | 22734032 | + | 1 | NA           | CUFF.1744 NA u         | TSS9392 | 3.56E-10  |
| chr9 | TCONS_00102541 | XLOC_088592 | 1055274  | 1055817  | - | 1 | OS09G0113000 | CUFF.1654 OS09T01130(x | TSS9404 | 1.381E-07 |
| chr9 | TCONS_00099673 | XLOC_088616 | 1302687  | 1302892  | - | 1 | OS09G0116400 | CUFF.1291 OS09T01164(i | TSS9407 | 2.997E-39 |
| chr9 | TCONS_00099702 | XLOC_088642 | 1549352  | 1549553  | - | 1 | OS09G0120100 | CUFF.1291 OS09T01201(x | TSS9409 | 3.4E-48   |
| chr9 | TCONS_00102545 | XLOC_088655 | 1649042  | 1649307  | - | 1 | OS09G0121050 | CUFF.1657 OS09T01210(i | TSS9411 | 4.203E-26 |
| chr9 | TCONS_00099727 | XLOC_088672 | 1807834  | 1808043  | - | 1 | OS09G0123300 | CUFF.1292 OS09T01233(i | TSS9412 | 5.698E-41 |
| chr9 | TCONS_00102561 | XLOC_088829 | 3629751  | 3630201  | - | 1 | OS09G0248000 | CUFF.1664 OS09T02480(i | TSS9429 | 3.129E-15 |
| chr9 | TCONS_00099897 | XLOC_088832 | 3632158  | 3632361  | - | 1 | OS09G0248000 | CUFF.1297 OS09T02480(i | TSS9430 | 0         |
| chr9 | TCONS_00099915 | XLOC_088851 | 3844671  | 3844933  | - | 1 | NA           | CUFF.1297 NA u         | TSS9431 | 1.713E-52 |
| chr9 | TCONS_00102565 | XLOC_088851 | 3844848  | 3845365  | - | 1 | NA           | CUFF.1663 NA u         | TSS9432 | 2.216E-31 |
| chr9 | TCONS_00102566 | XLOC_088852 | 3845451  | 3845667  | - | 1 | NA           | CUFF.1663 NA u         | TSS9432 | 0.0001868 |
| chr9 | TCONS_00102567 | XLOC_088853 | 3846400  | 3846753  | - | 1 | NA           | CUFF.1663 NA u         | TSS9432 | 4.53E-16  |

|      |                |             |         |         |   |   |              |                        |   |         |           |
|------|----------------|-------------|---------|---------|---|---|--------------|------------------------|---|---------|-----------|
| chr9 | TCONS_00102573 | XLOC_088871 | 4016537 | 4016794 | - | 1 | NA           | CUFF.1663 NA           | u | TSS9434 | 7.297E-19 |
| chr9 | TCONS_00099930 | XLOC_088873 | 4017275 | 4017486 | - | 1 | NA           | CUFF.1297 NA           | u | TSS9434 | 1.865E-79 |
| chr9 | TCONS_00099932 | XLOC_088875 | 4020062 | 4020377 | - | 1 | NA           | CUFF.1298 NA           | u | TSS9434 | 0         |
| chr9 | TCONS_00099933 | XLOC_088876 | 4024143 | 4025052 | - | 1 | NCRNA_42668  | CUFF.1298 NCRNA_42668  | x | TSS9434 | 0.0027227 |
| chr9 | TCONS_00102574 | XLOC_088876 | 4024344 | 4026598 | - | 1 | OS09G0252800 | CUFF.1666 OS09T0252800 | x | TSS9434 | 0.010024  |
| chr9 | TCONS_00102579 | XLOC_088936 | 4567112 | 4567540 | - | 1 | NA           | CUFF.1667 NA           | u | TSS9440 | 4.254E-21 |
| chr9 | TCONS_00100012 | XLOC_088950 | 4693111 | 4696279 | - | 1 | NCRNA_1528   | CUFF.1301 NCRNA_1528   | x | TSS9442 | 2.234E-13 |
| chr9 | TCONS_00100015 | XLOC_088953 | 4705628 | 4705970 | - | 1 | OS09G0263474 | CUFF.1302 OS09T0263474 | i | TSS9442 | 5.847E-46 |
| chr9 | TCONS_00100017 | XLOC_088955 | 4709265 | 4709687 | - | 1 | NA           | CUFF.1301 NA           | u | TSS9442 | 2.577E-14 |
| chr9 | TCONS_00102584 | XLOC_088955 | 4709646 | 4710409 | - | 1 | NA           | CUFF.1669 NA           | u | TSS9443 | 1.621E-11 |
| chr9 | TCONS_00102585 | XLOC_088956 | 4711161 | 4711362 | - | 1 | NA           | CUFF.1668 NA           | u | TSS9443 | 6.994E-29 |
| chr9 | TCONS_00100019 | XLOC_088957 | 4723809 | 4724243 | - | 1 | NA           | CUFF.1301 NA           | u | TSS9443 | 2.462E-58 |
| chr9 | TCONS_00102586 | XLOC_088959 | 4726261 | 4726601 | - | 1 | NA           | CUFF.1669 NA           | u | TSS9443 | 8.25E-41  |
| chr9 | TCONS_00102587 | XLOC_088960 | 4726808 | 4727158 | - | 1 | NA           | CUFF.1668 NA           | u | TSS9443 | 2.439E-07 |
| chr9 | TCONS_00102590 | XLOC_089004 | 5097222 | 5097431 | - | 1 | OS09G0267500 | CUFF.1670 OS09T0267500 | i | TSS9448 | 2.38E-16  |
| chr9 | TCONS_00100081 | XLOC_089015 | 5160576 | 5160806 | - | 1 | NA           | CUFF.1302 NA           | u | TSS9449 | 2.753E-12 |
| chr9 | TCONS_00100082 | XLOC_089016 | 5161791 | 5162340 | - | 1 | NA           | CUFF.1303 NA           | u | TSS9449 | 0.20934   |
| chr9 | TCONS_00102591 | XLOC_089080 | 5836885 | 5837236 | - | 1 | OS09G0278900 | CUFF.1672 OS09T0278900 | i | TSS9456 | 3.301E-22 |
| chr9 | TCONS_00102593 | XLOC_089116 | 6235850 | 6236085 | - | 1 | OS09G0284200 | CUFF.1673 OS09T0284200 | i | TSS9460 | 6.268E-22 |
| chr9 | TCONS_00102595 | XLOC_089138 | 6486329 | 6486610 | - | 1 | NA           | CUFF.1674 NA           | u | TSS9462 | 4.203E-26 |
| chr9 | TCONS_00102597 | XLOC_089140 | 6487551 | 6487954 | - | 1 | NA           | CUFF.1673 NA           | u | TSS9462 | 4.158E-12 |
| chr9 | TCONS_00102598 | XLOC_089141 | 6488505 | 6488862 | - | 1 | NA           | CUFF.1673 NA           | u | TSS9462 | 5.978E-10 |
| chr9 | TCONS_00102600 | XLOC_089142 | 6489914 | 6490116 | - | 1 | NA           | CUFF.1673 NA           | u | TSS9463 | 7.187E-39 |
| chr9 | TCONS_00102604 | XLOC_089148 | 6499325 | 6499539 | - | 1 | NA           | CUFF.1674 NA           | u | TSS9463 | 2.891E-35 |
| chr9 | TCONS_00102605 | XLOC_089149 | 6499770 | 6499974 | - | 1 | NA           | CUFF.1674 NA           | u | TSS9463 | 1.187E-36 |
| chr9 | TCONS_00102606 | XLOC_089150 | 6500046 | 6500336 | - | 1 | NA           | CUFF.1674 NA           | u | TSS9463 | 6.57E-17  |
| chr9 | TCONS_00102607 | XLOC_089151 | 6500943 | 6501149 | - | 1 | NA           | CUFF.1674 NA           | u | TSS9463 | 1.027E-29 |
| chr9 | TCONS_00102608 | XLOC_089152 | 6501849 | 6502442 | - | 1 | NA           | CUFF.1674 NA           | u | TSS9464 | 2.514E-28 |
| chr9 | TCONS_00100215 | XLOC_089155 | 6515745 | 6515989 | - | 1 | NA           | CUFF.1305 NA           | u | TSS9464 | 7.523E-18 |
| chr9 | TCONS_00100249 | XLOC_089187 | 6948216 | 6948443 | - | 1 | OS09G0293400 | CUFF.1306 OS09T0293400 | i | TSS9467 | 2.953E-34 |
| chr9 | TCONS_00102613 | XLOC_089211 | 7199712 | 7199984 | - | 1 | OS09G0297000 | CUFF.1676 OS09T0297000 | i | TSS9469 | 4.812E-09 |
| chr9 | TCONS_00102616 | XLOC_089226 | 7317150 | 7317565 | - | 1 | OS09G0299000 | CUFF.1677 OS09T0299000 | i | TSS9471 | 6.821E-10 |
| chr9 | TCONS_00102621 | XLOC_089297 | 8195308 | 8195566 | - | 1 | OS09G0309500 | CUFF.1679 OS09T0309500 | x | TSS9478 | 1.512E-25 |
| chr9 | TCONS_00100382 | XLOC_089316 | 8421521 | 8421733 | - | 1 | NA           | CUFF.1309 NA           | u | TSS9480 | 5.289E-42 |
| chr9 | TCONS_00102626 | XLOC_089386 | 9267163 | 9267407 | - | 1 | NA           | CUFF.1681 NA           | u | TSS9487 | 1.187E-36 |

|      |                |             |          |          |   |   |              |           |              |         |           |           |
|------|----------------|-------------|----------|----------|---|---|--------------|-----------|--------------|---------|-----------|-----------|
| chr9 | TCONS_00102627 | XLOC_089394 | 9358229  | 9358604  | - | 1 | OS09G0321900 | CUFF.1682 | OS09T03219(i | TSS9488 | 5.016E-18 |           |
| chr9 | TCONS_00100464 | XLOC_089401 | 9403075  | 9403288  | - | 1 | OS09G0322600 | CUFF.1312 | OS09T03226(i | TSS9489 | 0         |           |
| chr9 | TCONS_00102632 | XLOC_089431 | 9652594  | 9652856  | - | 1 | OS09G0327300 | CUFF.1683 | OS09T03273(i | TSS9492 | 5.592E-20 |           |
| chr9 | TCONS_00102633 | XLOC_089483 | 10228497 | 10229002 | - | 1 | NA           | CUFF.1684 | NA           | u       | TSS9497   | 2.845E-08 |
| chr9 | TCONS_00100565 | XLOC_089499 | 10450887 | 10451111 | - | 1 | OS09G0340400 | CUFF.1313 | OS09T03404(i | TSS9499 | 3.192E-33 |           |
| chr9 | TCONS_00102635 | XLOC_089629 | 11792244 | 11792446 | - | 1 | OS09G0361100 | CUFF.1689 | OS09T03611(x | TSS9513 | 2.527E-15 |           |
| chr9 | TCONS_00102641 | XLOC_089654 | 11956895 | 11957183 | - | 1 | NA           | CUFF.1689 | NA           | u       | TSS9515   | 2.638E-18 |
| chr9 | TCONS_00100763 | XLOC_089693 | 12254600 | 12254804 | - | 1 | NA           | CUFF.1317 | NA           | u       | TSS9519   | 0         |
| chr9 | TCONS_00102643 | XLOC_089712 | 12382707 | 12382961 | - | 1 | NA           | CUFF.1691 | NA           | u       | TSS9521   | 5.076E-11 |
| chr9 | TCONS_00102645 | XLOC_089738 | 12600658 | 12601383 | - | 1 | NA           | CUFF.1692 | NA           | u       | TSS9524   | 2.854E-39 |
| chr9 | TCONS_00100811 | XLOC_089739 | 12603037 | 12603495 | - | 1 | OS09G0376350 | CUFF.1319 | OS09T03763(x | TSS9524 | 1.508E-15 |           |
| chr9 | TCONS_00102647 | XLOC_089755 | 12820649 | 12821116 | - | 1 | OS09G0380000 | CUFF.1695 | OS09T03800(x | TSS9526 | 1.341E-21 |           |
| chr9 | TCONS_00100911 | XLOC_089835 | 13595000 | 13595422 | - | 1 | OS09G0393200 | CUFF.1696 | OS09T03932(x | TSS9534 | 5.434E-07 |           |
| chr9 | TCONS_00100912 | XLOC_089837 | 13600130 | 13600720 | - | 1 | OS09G0393200 | CUFF.1322 | OS09T03932(i | TSS9534 | 0.0056641 |           |
| chr9 | TCONS_00102661 | XLOC_089849 | 13708865 | 13709090 | - | 1 | OS09G0394900 | CUFF.1698 | OS09T03949(i | TSS9536 | 1.059E-39 |           |
| chr9 | TCONS_00100923 | XLOC_089850 | 13711791 | 13712012 | - | 1 | NA           | CUFF.1322 | NA           | u       | TSS9536   | 6.622E-39 |
| chr9 | TCONS_00102669 | XLOC_089927 | 14354044 | 14354332 | - | 1 | OS09G0406900 | CUFF.1699 | OS09T04069(i | TSS9544 | 1.549E-20 |           |
| chr9 | TCONS_00102670 | XLOC_089929 | 14359018 | 14359237 | - | 1 | OS09G0407050 | CUFF.1700 | OS09T04070(x | TSS9544 | 1.643E-15 |           |
| chr9 | TCONS_00102673 | XLOC_089942 | 14464255 | 14464802 | - | 1 | OS09G0408900 | CUFF.1699 | OS09T04089(x | TSS9546 | 1.387E-18 |           |
| chr9 | TCONS_00102674 | XLOC_089943 | 14465228 | 14465906 | - | 1 | OS09G0408900 | CUFF.1699 | OS09T04089(x | TSS9546 | 0.0007261 |           |
| chr9 | TCONS_00101020 | XLOC_089944 | 14466517 | 14466826 | - | 1 | OS09G0408900 | CUFF.1324 | OS09T04089(x | TSS9546 | 6.513E-29 |           |
| chr9 | TCONS_00102676 | XLOC_089956 | 14531329 | 14531723 | - | 1 | OS09G0409950 | CUFF.1700 | OS09T04099(i | TSS9547 | 4.2E-31   |           |
| chr9 | TCONS_00102679 | XLOC_089960 | 14545776 | 14546338 | - | 1 | OS09G0410300 | CUFF.1700 | OS09T04103(i | TSS9547 | 6.57E-17  |           |
| chr9 | TCONS_00101034 | XLOC_089963 | 14557473 | 14557810 | - | 1 | NA           | CUFF.1324 | NA           | u       | TSS9548   | 8.261E-17 |
| chr9 | TCONS_00102680 | XLOC_089984 | 14661137 | 14661346 | - | 1 | OS09G0412700 | CUFF.1701 | OS09T04127(x | TSS9550 | 2.26E-21  |           |
| chr9 | TCONS_00101070 | XLOC_089995 | 14711899 | 14712107 | - | 1 | OS09G0413700 | CUFF.1326 | OS09T04137(i | TSS9551 | 2.339E-70 |           |
| chr9 | TCONS_00101095 | XLOC_090016 | 14930261 | 14930689 | - | 1 | OS09G0416800 | CUFF.1326 | OS09T04168(x | TSS9554 | 1.236E-53 |           |
| chr9 | TCONS_00101098 | XLOC_090019 | 14973577 | 14973816 | - | 1 | OS09G0417500 | CUFF.1326 | OS09T04175(i | TSS9554 | 1.167E-21 |           |
| chr9 | TCONS_00102686 | XLOC_090041 | 15161154 | 15161400 | - | 1 | OS09G0420800 | CUFF.1703 | OS09T04208(i | TSS9556 | 1.855E-47 |           |
| chr9 | TCONS_00102687 | XLOC_090063 | 15360409 | 15360788 | - | 1 | OS09G0423700 | CUFF.1703 | OS09T04237(x | TSS9559 | 4.203E-26 |           |
| chr9 | TCONS_00102691 | XLOC_090121 | 15792173 | 15792472 | - | 1 | OS09G0431600 | CUFF.1705 | OS09T04316(i | TSS9565 | 5.592E-20 |           |
| chr9 | TCONS_00101246 | XLOC_090162 | 16091635 | 16091844 | - | 1 | NA           | CUFF.1330 | NA           | u       | TSS9569   | 1.194E-74 |
| chr9 | TCONS_00102697 | XLOC_090162 | 16091452 | 16091664 | - | 1 | NA           | CUFF.1707 | NA           | u       | TSS9569   | 1.361E-38 |
| chr9 | TCONS_00102702 | XLOC_090186 | 16284556 | 16285045 | - | 1 | OS09G0439400 | CUFF.1708 | OS09T04394(i | TSS9572 | 2.26E-21  |           |
| chr9 | TCONS_00102706 | XLOC_090209 | 16477906 | 16478112 | - | 1 | OS09G0442900 | CUFF.1709 | OS09T04429(x | TSS9574 | 2.638E-18 |           |

|      |                |             |          |          |   |   |              |           |              |   |         |           |
|------|----------------|-------------|----------|----------|---|---|--------------|-----------|--------------|---|---------|-----------|
| chr9 | TCONS_00102708 | XLOC_090226 | 16658728 | 16658930 | - | 1 | NA           | CUFF.1710 | NA           | u | TSS9576 | 2.345E-72 |
| chr9 | TCONS_00101334 | XLOC_090251 | 16876116 | 16876317 | - | 1 | NA           | CUFF.1333 | NA           | u | TSS9579 | 0         |
| chr9 | TCONS_00101385 | XLOC_090299 | 17222300 | 17224897 | - | 1 | HSFB1        | CUFF.1335 | OS09T04568(x |   | TSS9584 | 2.255E-59 |
| chr9 | TCONS_00102714 | XLOC_090300 | 17224902 | 17225115 | - | 1 | HSFB1        | CUFF.1713 | OS09T04568(x |   | TSS9584 | 8.155E-21 |
| chr9 | TCONS_00101489 | XLOC_090401 | 18036083 | 18036618 | - | 1 | OS09G0472100 | CUFF.1338 | OS09T04721(x |   | TSS9595 | 5.532E-61 |
| chr9 | TCONS_00101512 | XLOC_090424 | 18139733 | 18139964 | - | 1 | NA           | CUFF.1337 | NA           | u | TSS9597 | 1.167E-21 |
| chr9 | TCONS_00102730 | XLOC_090459 | 18378771 | 18379002 | - | 1 | NA           | CUFF.1717 | NA           | u | TSS9601 | 1.859E-10 |
| chr9 | TCONS_00102734 | XLOC_090501 | 18708486 | 18708693 | - | 1 | OS09G0484800 | CUFF.1718 | OS09T04848(i |   | TSS9606 | 2.861E-49 |
| chr9 | TCONS_00101599 | XLOC_090506 | 18761597 | 18762357 | - | 1 | NA           | CUFF.1341 | NA           | u | TSS9607 | 1.575E-70 |
| chr9 | TCONS_00101601 | XLOC_090508 | 18763441 | 18763730 | - | 1 | NA           | CUFF.1339 | NA           | u | TSS9607 | 5.227E-53 |
| chr9 | TCONS_00101602 | XLOC_090509 | 18764072 | 18764290 | - | 1 | NA           | CUFF.1339 | NA           | u | TSS9607 | 7.764E-53 |
| chr9 | TCONS_00101613 | XLOC_090519 | 18812047 | 18812252 | - | 1 | NA           | CUFF.1340 | NA           | u | TSS9608 | 0         |
| chr9 | TCONS_00102737 | XLOC_090553 | 19075692 | 19075982 | - | 1 | OS09G0492700 | CUFF.1720 | OS09T04927(i |   | TSS9612 | 3.907E-44 |
| chr9 | TCONS_00102743 | XLOC_090615 | 19443618 | 19443928 | - | 1 | OS09G0502500 | CUFF.1721 | OS09T05025(x |   | TSS9618 | 1.033E-24 |
| chr9 | TCONS_00102746 | XLOC_090637 | 19570938 | 19571140 | - | 1 | OS09G0505800 | CUFF.1723 | OS09T05058(i |   | TSS9621 | 1.339E-23 |
| chr9 | TCONS_00102748 | XLOC_090661 | 19757618 | 19757900 | - | 1 | OS09G0509200 | CUFF.1725 | OS09T05092(i |   | TSS9623 | 7.972E-26 |
| chr9 | TCONS_00102752 | XLOC_090690 | 19930281 | 19930573 | - | 1 | NA           | CUFF.1725 | NA           | u | TSS9626 | 6.57E-17  |
| chr9 | TCONS_00102756 | XLOC_090700 | 19995099 | 19995304 | - | 1 | OS09G0513600 | CUFF.1727 | OS09T05136(x |   | TSS9627 | 5.476E-35 |
| chr9 | TCONS_00101809 | XLOC_090716 | 20054380 | 20054625 | - | 1 | OS09G0514900 | CUFF.1345 | OS09T05149(i |   | TSS9629 | 1.11E-13  |
| chr9 | TCONS_00102766 | XLOC_090818 | 20778298 | 20778900 | - | 1 | NA           | CUFF.1729 | NA           | u | TSS9640 | 9.468E-18 |
| chr9 | TCONS_00101917 | XLOC_090819 | 20782261 | 20782795 | - | 1 | OS09G0530500 | CUFF.1348 | OS09T05305(x |   | TSS9640 | 2.585E-33 |
| chr9 | TCONS_00101918 | XLOC_090821 | 20783974 | 20784461 | - | 1 | NA           | CUFF.1347 | NA           | u | TSS9640 | 1.154E-49 |
| chr9 | TCONS_00102769 | XLOC_090822 | 20784536 | 20784804 | - | 1 | NA           | CUFF.1729 | NA           | u | TSS9640 | 2.542E-23 |
| chr9 | TCONS_00102770 | XLOC_090823 | 20784890 | 20785118 | - | 1 | NA           | CUFF.1729 | NA           | u | TSS9641 | 1.748E-37 |
| chr9 | TCONS_00102771 | XLOC_090824 | 20785624 | 20786052 | - | 1 | NA           | CUFF.1729 | NA           | u | TSS9641 | 8.42E-54  |
| chr9 | TCONS_00102772 | XLOC_090845 | 20930231 | 20930604 | - | 1 | OS09G0533100 | CUFF.1732 | OS09T05331(i |   | TSS9643 | 5.418E-30 |
| chr9 | TCONS_00102774 | XLOC_090855 | 21039409 | 21039612 | - | 1 | OS09G0535100 | CUFF.1732 | OS09T05351(i |   | TSS9644 | 2.638E-18 |
| chr9 | TCONS_00102775 | XLOC_090857 | 21054265 | 21054502 | - | 1 | NA           | CUFF.1732 | NA           | u | TSS9644 | 7.297E-19 |
| chr9 | TCONS_00101979 | XLOC_090879 | 21231641 | 21231867 | - | 1 | OS09G0539200 | CUFF.1350 | OS09T05392(x |   | TSS9647 | 8.32E-36  |
| chr9 | TCONS_00102020 | XLOC_090921 | 21494037 | 21494260 | - | 1 | OS09G0544300 | CUFF.1352 | OS09T05443(x |   | TSS9651 | 2.997E-39 |
| chr9 | TCONS_00102022 | XLOC_090924 | 21513516 | 21513758 | - | 1 | NA           | CUFF.1351 | NA           | u | TSS9652 | 2.637E-06 |
| chr9 | TCONS_00102786 | XLOC_090943 | 21572260 | 21572632 | - | 1 | NA           | CUFF.1735 | NA           | u | TSS9654 | 1.168E-26 |
| chr9 | TCONS_00102050 | XLOC_090955 | 21642877 | 21643444 | - | 1 | LOGL9        | CUFF.1353 | OS09T05475(x |   | TSS9655 | 9.434E-32 |
| chr9 | TCONS_00102052 | XLOC_090957 | 21647725 | 21647944 | - | 1 | NA           | CUFF.1352 | NA           | u | TSS9655 | 1.657E-47 |
| chr9 | TCONS_00102083 | XLOC_090985 | 21857036 | 21857243 | - | 1 | OS09G0551600 | CUFF.1353 | OS09T05516(x |   | TSS9658 | 9.705E-78 |

|      |                |             |          |          |   |   |              |           |              |   |         |           |
|------|----------------|-------------|----------|----------|---|---|--------------|-----------|--------------|---|---------|-----------|
| chr9 | TCONS_00102793 | XLOC_091025 | 22129642 | 22129843 | - | 1 | NA           | CUFF.1738 | NA           | u | TSS9662 | 1.508E-30 |
| chr9 | TCONS_00102134 | XLOC_091040 | 22184399 | 22184632 | - | 1 | NA           | CUFF.1355 | NA           | u | TSS9664 | 1.05E-27  |
| chr9 | TCONS_00102157 | XLOC_091062 | 22304397 | 22305154 | - | 1 | NA           | CUFF.1356 | NA           | u | TSS9666 | 0         |
| chr9 | TCONS_00102203 | XLOC_091107 | 22655376 | 22655662 | - | 1 | OS09G0567400 | CUFF.1358 | OS09T05674(x |   | TSS9671 | 9.688E-29 |
| chr9 | TCONS_00102216 | XLOC_091121 | 22693273 | 22693531 | - | 1 | NCRNA_5442   | CUFF.1743 | NCRNA_544: x |   | TSS9673 | 0         |
| chr9 | TCONS_00102806 | XLOC_091135 | 22748801 | 22749405 | - | 1 | NA           | CUFF.1743 | NA           | u | TSS9674 | 7.264E-12 |
| chr9 | TCONS_00102807 | XLOC_091137 | 22753546 | 22753890 | - | 1 | NA           | CUFF.1744 | NA           | u | TSS9674 | 1.443E-06 |
| chr9 | TCONS_00102236 | XLOC_091143 | 22773695 | 22773919 | - | 1 | NA           | CUFF.1359 | NA           | u | TSS9675 | 0.0013713 |
| chr9 | TCONS_00102237 | XLOC_091144 | 22774466 | 22774688 | - | 1 | NA           | CUFF.1359 | NA           | u | TSS9675 | 2.144E-28 |
| chr9 | TCONS_00102245 | XLOC_091150 | 22810003 | 22810279 | - | 1 | NCRNA_42592  | CUFF.1360 | NCRNA_425: x |   | TSS9676 | 0         |
| chr9 | TCONS_00102811 | XLOC_091170 | 22938931 | 22939193 | - | 1 | OS09G0573200 | CUFF.1745 | OS09T05732(x |   | TSS9678 | 3.396E-42 |
| chr9 | TCONS_00102270 | XLOC_091176 | 9416629  | 9416851  | . | 1 | OS09G0322600 | CUFF.1312 | OS09T03226(i |   | TSS9679 | 1.345E-24 |
| chr9 | TCONS_00102816 | XLOC_091181 | 21918754 | 21918958 | . | 1 | OS09G0553200 | CUFF.1739 | OS09T05532(i |   | TSS9679 | 5.476E-35 |
| chr9 | TCONS_00102817 | XLOC_091182 | 21919821 | 21920021 | . | 1 | OS09G0553200 | CUFF.1739 | OS09T05532(i |   | TSS9679 | 1.387E-18 |



**Table S3 Differentially expressed lncRNAs in two libraries.**

| Transcript_id  | K1_fpkm   | K2_fpkm   | Regulation | log2 fold_change | p-value  | FDR      |
|----------------|-----------|-----------|------------|------------------|----------|----------|
| TCONS_00018598 | 160652.54 | 259985.16 | up         | 0.694485525      | 0        | 0        |
| TCONS_00010326 | 212860.41 | 249921.11 | up         | 0.231565132      | 0        | 0        |
| TCONS_00004325 | 115115.03 | 182697.09 | up         | 0.666377477      | 0        | 0        |
| TCONS_00041054 | 43015.162 | 47185.684 | up         | 0.133503968      | 0        | 0        |
| TCONS_00047126 | 7491.3626 | 31381.625 | up         | 2.06662003       | 0        | 0        |
| TCONS_00015086 | 16497.936 | 17585.812 | up         | 0.092126379      | 0        | 0        |
| TCONS_00041815 | 4778.8204 | 10352.677 | up         | 1.115277442      | 0        | 0        |
| TCONS_00041816 | 3331.5276 | 4787.5457 | up         | 0.523102439      | 0        | 0        |
| TCONS_00030517 | 2967.076  | 3050.4977 | up         | 0.040002782      | 4.17E-25 | 7.44E-25 |
| TCONS_00043826 | 187.96599 | 2964.1809 | up         | 3.979089973      | 0        | 0        |
| TCONS_00025765 | 1345.2424 | 2553.3153 | up         | 0.924505498      | 0        | 0        |
| TCONS_00033095 | 1292.2855 | 1314.7919 | up         | 0.024909671      | 5.63E-11 | 6.62E-11 |
| TCONS_00033096 | 1153.2012 | 1246.4522 | up         | 0.112183324      | 8.23E-15 | 1.04E-14 |
| TCONS_00073726 | 202.85885 | 1244.0428 | up         | 2.61648793       | 0        | 0        |
| TCONS_00060754 | 941.25663 | 1239.8257 | up         | 0.397477267      | 2.51E-33 | 6.29E-33 |
| TCONS_00043824 | 147.99132 | 1092.7951 | up         | 2.884438403      | 0        | 0        |
| TCONS_00032749 | 10.418162 | 1092.1208 | up         | 6.711887933      | 0        | 0        |
| TCONS_00043825 | 120.87249 | 980.17632 | up         | 3.019555334      | 0        | 0        |
| TCONS_00096366 | 925.98308 | 950.14678 | up         | 0.037164573      | 9.94E-09 | 1.13E-08 |
| TCONS_00100012 | 794.43795 | 892.90916 | up         | 0.168578858      | 2.23E-13 | 2.75E-13 |
| TCONS_00097420 | 856.07503 | 863.99617 | up         | 0.013287664      | 2.63E-07 | 2.94E-07 |
| TCONS_00055327 | 0         | 860.87564 | up         | Inf              | 0        | 0        |
| TCONS_00054751 | 0         | 845.70891 | up         | Inf              | 0        | 0        |
| TCONS_00096376 | 0         | 784.62398 | up         | Inf              | 0        | 0        |
| TCONS_00073113 | 0         | 756.22875 | up         | Inf              | 0        | 0        |
| TCONS_00016947 | 272.32633 | 730.01577 | up         | 1.422591129      | 3.04E-75 | 2.36E-74 |
| TCONS_00018649 | 521.29989 | 728.45492 | up         | 0.482726145      | 4.46E-24 | 7.66E-24 |
| TCONS_00064912 | 657.56741 | 717.9886  | up         | 0.12682215       | 1.36E-09 | 1.56E-09 |
| TCONS_00065626 | 641.29573 | 700.13685 | up         | 0.126647161      | 2.01E-09 | 2.31E-09 |
| TCONS_00076593 | 566.18902 | 647.83684 | up         | 0.194346748      | 6.49E-11 | 7.64E-11 |
| TCONS_00055112 | 223.41916 | 636.71048 | up         | 1.51088462       | 2.84E-70 | 1.97E-69 |
| TCONS_00055400 | 7.9829343 | 545.31752 | up         | 6.09403355       | 0        | 0        |
| TCONS_00016955 | 216.77602 | 530.85494 | up         | 1.292112514      | 9.35E-50 | 4.12E-49 |
| TCONS_00018628 | 0         | 516.59403 | up         | Inf              | 0        | 0        |
| TCONS_00076347 | 374.43938 | 510.2297  | up         | 0.446414724      | 3.40E-16 | 4.43E-16 |
| TCONS_00085108 | 101.25722 | 508.19011 | up         | 2.327343526      | 3.50E-85 | 3.30E-84 |
| TCONS_00072618 | 130.38392 | 507.8804  | up         | 1.961722841      | 3.86E-73 | 2.85E-72 |
| TCONS_00026002 | 3.6299758 | 486.5731  | up         | 7.066552814      | 0        | 0        |
| TCONS_00073102 | 438.11292 | 479.97212 | up         | 0.131647842      | 5.31E-07 | 5.91E-07 |
| TCONS_00043994 | 467.76865 | 476.48203 | up         | 0.026626629      | 8.44E-05 | 9.12E-05 |
| TCONS_00011856 | 133.77397 | 474.60649 | up         | 1.826934371      | 8.19E-64 | 4.98E-63 |
| TCONS_00012531 | 3.1333667 | 464.42982 | up         | 7.211603147      | 0        | 0        |
| TCONS_00055380 | 435.84358 | 448.48015 | up         | 0.041233697      | 7.58E-05 | 8.20E-05 |
| TCONS_00012912 | 206.13077 | 442.79489 | up         | 1.10307869       | 2.24E-35 | 5.99E-35 |
| TCONS_00096519 | 35.558226 | 431.76809 | up         | 3.60200136       | 0        | 0        |
| TCONS_00062833 | 382.52727 | 431.40133 | up         | 0.173468018      | 3.36E-07 | 3.75E-07 |

|                |           |           |    |             |          |          |
|----------------|-----------|-----------|----|-------------|----------|----------|
| TCONS_00043168 | 0         | 427.90444 | up | Inf         | 0        | 0        |
| TCONS_00018954 | 304.70405 | 419.364   | up | 0.460794349 | 7.39E-14 | 9.19E-14 |
| TCONS_00019149 | 10.020246 | 417.58018 | up | 5.381063437 | 0        | 0        |
| TCONS_00060794 | 237.19157 | 409.73691 | up | 0.788645132 | 4.69E-23 | 7.75E-23 |
| TCONS_00081282 | 276.53409 | 408.60785 | up | 0.563259566 | 2.32E-16 | 3.04E-16 |
| TCONS_00096615 | 2.9507472 | 403.1335  | up | 7.09403355  | 0        | 0        |
| TCONS_00005596 | 240.4859  | 402.48072 | up | 0.742967401 | 2.92E-21 | 4.48E-21 |
| TCONS_00018953 | 336.27833 | 400.6122  | up | 0.252550537 | 1.57E-08 | 1.78E-08 |
| TCONS_00026000 | 379.20095 | 398.90044 | up | 0.073066121 | 5.05E-05 | 5.47E-05 |
| TCONS_00054967 | 284.14334 | 373.85513 | up | 0.395860439 | 4.19E-11 | 4.95E-11 |
| TCONS_00081276 | 14.856272 | 373.3838  | up | 4.651515315 | 0        | 0        |
| TCONS_00044115 | 0         | 372.85711 | up | Inf         | 0        | 0        |
| TCONS_00064332 | 0         | 367.35576 | up | Inf         | 0        | 0        |
| TCONS_00004310 | 219.21844 | 366.88719 | up | 0.742967401 | 1.45E-19 | 2.09E-19 |
| TCONS_00073103 | 29.355086 | 357.97784 | up | 3.608187883 | 4.23E-82 | 3.75E-81 |
| TCONS_00012072 | 317.03493 | 356.2316  | up | 0.168173718 | 3.98E-06 | 4.38E-06 |
| TCONS_00018717 | 3.9263004 | 354.23591 | up | 6.495396113 | 0        | 0        |
| TCONS_00054629 | 11.659922 | 353.16247 | up | 4.920701947 | 0        | 0        |
| TCONS_00016962 | 171.01219 | 352.66153 | up | 1.044185001 | 6.50E-27 | 1.24E-26 |
| TCONS_00064681 | 158.17193 | 349.48106 | up | 1.143720674 | 2.82E-29 | 6.01E-29 |
| TCONS_00043681 | 0         | 345.26791 | up | Inf         | 0        | 0        |
| TCONS_00096952 | 2.3693192 | 342.02088 | up | 7.173468018 | 0        | 0        |
| TCONS_00017019 | 278.18369 | 341.78978 | up | 0.297071451 | 2.66E-08 | 3.01E-08 |
| TCONS_00018111 | 297.22153 | 335.90407 | up | 0.17651061  | 4.97E-06 | 5.46E-06 |
| TCONS_00081084 | 3.4111475 | 334.13742 | up | 6.614040609 | 0        | 0        |
| TCONS_00043584 | 0         | 333.79922 | up | Inf         | 0        | 0        |
| TCONS_00064394 | 0         | 333.58538 | up | Inf         | 0        | 0        |
| TCONS_00043081 | 0         | 333.34936 | up | Inf         | 0        | 0        |
| TCONS_00044159 | 0         | 330.28143 | up | Inf         | 0        | 0        |
| TCONS_00042967 | 23.25943  | 325.48101 | up | 3.806685687 | 1.13E-76 | 8.94E-76 |
| TCONS_00088568 | 208.64692 | 324.7994  | up | 0.638485366 | 5.47E-15 | 6.96E-15 |
| TCONS_00064924 | 0         | 320.5403  | up | Inf         | 0        | 0        |
| TCONS_00055564 | 144.14445 | 318.48733 | up | 1.143720674 | 8.19E-27 | 1.56E-26 |
| TCONS_00019056 | 2.7020887 | 313.43908 | up | 6.857966192 | 2.82E-86 | 2.72E-85 |
| TCONS_00013131 | 0         | 311.34636 | up | Inf         | 7.81E-88 | 7.84E-87 |
| TCONS_00054694 | 71.164194 | 309.95642 | up | 2.122841945 | 1.11E-48 | 4.71E-48 |
| TCONS_00064325 | 0         | 307.30722 | up | Inf         | 9.95E-87 | 9.77E-86 |
| TCONS_00055045 | 0         | 306.94713 | up | Inf         | 9.95E-87 | 9.77E-86 |
| TCONS_00043426 | 0         | 303.41726 | up | Inf         | 1.27E-85 | 1.21E-84 |
| TCONS_00043060 | 0         | 301.8706  | up | Inf         | 2.40E-85 | 2.27E-84 |
| TCONS_00055484 | 2.1471955 | 301.65402 | up | 7.134297421 | 6.19E-84 | 5.69E-83 |
| TCONS_00054590 | 2.466522  | 300.4193  | up | 6.92835552  | 2.21E-83 | 2.01E-82 |
| TCONS_00081779 | 0         | 300.27028 | up | Inf         | 8.56E-85 | 8.00E-84 |
| TCONS_00102296 | 0         | 296.93304 | up | Inf         | 5.77E-84 | 5.32E-83 |
| TCONS_00055146 | 0         | 296.85967 | up | Inf         | 5.77E-84 | 5.32E-83 |
| TCONS_00102314 | 0         | 295.75994 | up | Inf         | 1.09E-83 | 1.00E-82 |
| TCONS_00072423 | 4.0248686 | 295.69064 | up | 6.19900311  | 6.88E-81 | 6.01E-80 |
| TCONS_00073104 | 80.932754 | 295.05467 | up | 1.866186699 | 3.99E-41 | 1.32E-40 |
| TCONS_00096532 | 0         | 294.61204 | up | Inf         | 2.06E-83 | 1.88E-82 |

|                |           |           |    |             |          |           |
|----------------|-----------|-----------|----|-------------|----------|-----------|
| TCONS_00012973 | 0         | 291.08951 | up | Inf         | 2.63E-82 | 2.34E-81  |
| TCONS_00025848 | 0         | 290.85958 | up | Inf         | 2.63E-82 | 2.34E-81  |
| TCONS_00032658 | 0         | 286.94655 | up | Inf         | 3.35E-81 | 2.94E-80  |
| TCONS_00032655 | 0         | 281.47394 | up | Inf         | 1.52E-79 | 1.29E-78  |
| TCONS_00025984 | 0         | 279.56854 | up | Inf         | 2.88E-79 | 2.41E-78  |
| TCONS_00064904 | 0         | 279.56854 | up | Inf         | 2.88E-79 | 2.41E-78  |
| TCONS_00031680 | 197.50933 | 278.1358  | up | 0.493868643 | 3.00E-10 | 3.49E-10  |
| TCONS_00054564 | 8.1937273 | 276.69023 | up | 5.077608002 | 6.11E-73 | 4.49E-72  |
| TCONS_00054998 | 173.25328 | 276.62777 | up | 0.675063337 | 7.96E-14 | 9.85E-14  |
| TCONS_00096756 | 0         | 276.1697  | up | Inf         | 3.67E-78 | 3.02E-77  |
| TCONS_00012629 | 7.5151843 | 276.05494 | up | 5.19900311  | 1.15E-72 | 8.42E-72  |
| TCONS_00102375 | 0         | 272.27544 | up | Inf         | 4.69E-77 | 3.75E-76  |
| TCONS_00011928 | 56.00836  | 270.7043  | up | 2.273003691 | 2.34E-45 | 8.98E-45  |
| TCONS_00011898 | 0         | 270.50742 | up | Inf         | 8.85E-77 | 7.04E-76  |
| TCONS_00089596 | 0         | 268.73069 | up | Inf         | 3.16E-76 | 2.49E-75  |
| TCONS_00081776 | 0         | 263.69427 | up | Inf         | 7.62E-75 | 5.87E-74  |
| TCONS_00073038 | 0         | 262.99333 | up | Inf         | 1.44E-74 | 1.10E-73  |
| TCONS_00032846 | 146.00929 | 262.51411 | up | 0.846334764 | 1.70E-16 | 2.22E-16  |
| TCONS_00102406 | 0         | 261.40903 | up | Inf         | 5.14E-74 | 3.88E-73  |
| TCONS_00064905 | 178.3824  | 260.56776 | up | 0.546685341 | 8.48E-11 | 9.97E-11  |
| TCONS_00043206 | 84.233239 | 260.55881 | up | 1.629147502 | 3.24E-32 | 7.78E-32  |
| TCONS_00055115 | 0         | 259.773   | up | Inf         | 9.72E-74 | 7.28E-73  |
| TCONS_00012000 | 66.043888 | 259.06805 | up | 1.971834157 | 2.85E-38 | 8.50E-38  |
| TCONS_00064664 | 0         | 255.69105 | up | Inf         | 1.24E-72 | 9.05E-72  |
| TCONS_00081190 | 0         | 255.25823 | up | Inf         | 2.34E-72 | 1.70E-71  |
| TCONS_00102708 | 0         | 255.25823 | up | Inf         | 2.34E-72 | 1.70E-71  |
| TCONS_00044035 | 0         | 254.7587  | up | Inf         | 2.34E-72 | 1.70E-71  |
| TCONS_00081567 | 6.9204575 | 254.20886 | up | 5.19900311  | 2.92E-67 | 1.91E-66  |
| TCONS_00043525 | 193.8801  | 253.73177 | up | 0.388139402 | 7.34E-08 | 8.23E-08  |
| TCONS_00064141 | 22.580835 | 253.20384 | up | 3.487128497 | 4.10E-57 | 2.15E-56  |
| TCONS_00055303 | 0         | 252.30588 | up | Inf         | 1.58E-71 | 1.13E-70  |
| TCONS_00072733 | 0         | 252.2589  | up | Inf         | 1.58E-71 | 1.13E-70  |
| TCONS_00090108 | 57.948409 | 251.45059 | up | 2.117433983 | 1.55E-39 | 4.90E-39  |
| TCONS_00018611 | 3.5365573 | 250.70005 | up | 6.147472809 | 1.86E-68 | 1.24E-67  |
| TCONS_00043866 | 0         | 249.18065 | up | Inf         | 1.07E-70 | 7.49E-70  |
| TCONS_00055463 | 0         | 249.15157 | up | Inf         | 1.07E-70 | 7.49E-70  |
| TCONS_00073074 | 0         | 248.88694 | up | Inf         | 1.07E-70 | 7.49E-70  |
| TCONS_00012532 | 215.64698 | 248.83825 | up | 0.206536783 | 3.85E-05 | 4.18E-05  |
| TCONS_00081555 | 0         | 247.96514 | up | Inf         | 2.02E-70 | 1.41E-69  |
| TCONS_00102432 | 0         | 247.96514 | up | Inf         | 2.02E-70 | 1.41E-69  |
| TCONS_00073112 | 0         | 247.06671 | up | Inf         | 3.82E-70 | 2.64E-69  |
| TCONS_00081482 | 2.0166532 | 246.92545 | up | 6.935968704 | 9.82E-69 | 6.60E-68  |
| TCONS_00096747 | 0         | 245.66205 | up | Inf         | 7.22E-70 | 4.96E-69  |
| TCONS_00064812 | 37.447926 | 244.34521 | up | 2.705963099 | 2.96E-47 | 1.21E-46  |
| TCONS_00052298 | 229.43512 | 244.16698 | up | 0.089781867 | 0.000995 | 0.0010602 |
| TCONS_00033109 | 0         | 243.90013 | up | Inf         | 2.58E-69 | 1.76E-68  |
| TCONS_00055593 | 165.18223 | 243.31355 | up | 0.558758174 | 2.95E-10 | 3.43E-10  |
| TCONS_00033027 | 4.0080983 | 242.7992  | up | 5.920701947 | 3.02E-66 | 1.93E-65  |
| TCONS_00025775 | 0         | 242.67051 | up | Inf         | 4.87E-69 | 3.30E-68  |

|                |           |           |    |             |          |           |
|----------------|-----------|-----------|----|-------------|----------|-----------|
| TCONS_00043503 | 0         | 239.37228 | up | Inf         | 6.22E-68 | 4.12E-67  |
| TCONS_00081790 | 0         | 239.37228 | up | Inf         | 6.22E-68 | 4.12E-67  |
| TCONS_00055514 | 100.77504 | 239.10924 | up | 1.24653148  | 2.04E-22 | 3.29E-22  |
| TCONS_00012675 | 0         | 238.8655  | up | Inf         | 6.22E-68 | 4.12E-67  |
| TCONS_00032693 | 0         | 237.28721 | up | Inf         | 2.22E-67 | 1.46E-66  |
| TCONS_00089451 | 0         | 237.25059 | up | Inf         | 2.22E-67 | 1.46E-66  |
| TCONS_00088914 | 96.672938 | 236.86222 | up | 1.292864114 | 4.26E-23 | 7.04E-23  |
| TCONS_00072496 | 20.861427 | 236.01501 | up | 3.499968843 | 1.17E-53 | 5.68E-53  |
| TCONS_00013123 | 0         | 235.89604 | up | Inf         | 4.20E-67 | 2.75E-66  |
| TCONS_00018937 | 4.0588337 | 235.40994 | up | 5.857966192 | 4.90E-64 | 2.99E-63  |
| TCONS_00012677 | 11.613001 | 234.49419 | up | 4.335739447 | 1.61E-58 | 8.80E-58  |
| TCONS_00096484 | 0         | 234.25278 | up | Inf         | 1.50E-66 | 9.69E-66  |
| TCONS_00081066 | 0         | 233.88192 | up | Inf         | 1.50E-66 | 9.69E-66  |
| TCONS_00044208 | 2.8292458 | 233.37895 | up | 6.366113096 | 3.60E-64 | 2.20E-63  |
| TCONS_00089657 | 0         | 233.34588 | up | Inf         | 2.84E-66 | 1.82E-65  |
| TCONS_00012046 | 0         | 233.23453 | up | Inf         | 2.84E-66 | 1.82E-65  |
| TCONS_00064986 | 0         | 232.13757 | up | Inf         | 5.37E-66 | 3.41E-65  |
| TCONS_00033153 | 0         | 232.0856  | up | Inf         | 5.37E-66 | 3.41E-65  |
| TCONS_00026173 | 0         | 231.35503 | up | Inf         | 1.01E-65 | 6.42E-65  |
| TCONS_00072215 | 80.333619 | 230.97395 | up | 1.523654373 | 7.39E-27 | 1.41E-26  |
| TCONS_00032822 | 60.481483 | 230.14728 | up | 1.927991983 | 1.23E-33 | 3.12E-33  |
| TCONS_00043998 | 0         | 230.11916 | up | Inf         | 1.92E-65 | 1.21E-64  |
| TCONS_00055347 | 0         | 229.46028 | up | Inf         | 3.62E-65 | 2.26E-64  |
| TCONS_00043226 | 0         | 229.1427  | up | Inf         | 3.62E-65 | 2.26E-64  |
| TCONS_00073024 | 4.0248686 | 228.25243 | up | 5.825544714 | 4.21E-62 | 2.46E-61  |
| TCONS_00081283 | 0         | 227.49095 | up | Inf         | 1.30E-64 | 8.00E-64  |
| TCONS_00055211 | 0         | 227.36058 | up | Inf         | 1.30E-64 | 8.00E-64  |
| TCONS_00018666 | 0         | 225.97808 | up | Inf         | 2.45E-64 | 1.50E-63  |
| TCONS_00072975 | 0         | 225.97808 | up | Inf         | 2.45E-64 | 1.50E-63  |
| TCONS_00032665 | 206.33835 | 224.74182 | up | 0.123256572 | 0.000672 | 0.0007167 |
| TCONS_00043690 | 0         | 224.5722  | up | Inf         | 4.63E-64 | 2.83E-63  |
| TCONS_00019044 | 8.0497371 | 223.06487 | up | 4.79237785  | 4.72E-58 | 2.55E-57  |
| TCONS_00054744 | 0         | 222.89001 | up | Inf         | 1.65E-63 | 1.00E-62  |
| TCONS_00025761 | 0         | 222.53281 | up | Inf         | 1.65E-63 | 1.00E-62  |
| TCONS_00043308 | 0         | 222.23291 | up | Inf         | 3.13E-63 | 1.88E-62  |
| TCONS_00025894 | 0         | 221.80368 | up | Inf         | 3.13E-63 | 1.88E-62  |
| TCONS_00054847 | 0         | 220.79087 | up | Inf         | 5.91E-63 | 3.53E-62  |
| TCONS_00054802 | 0         | 220.05564 | up | Inf         | 1.12E-62 | 6.64E-62  |
| TCONS_00096901 | 0         | 219.43817 | up | Inf         | 2.11E-62 | 1.25E-61  |
| TCONS_00025886 | 0         | 219.13198 | up | Inf         | 2.11E-62 | 1.25E-61  |
| TCONS_00032919 | 0         | 218.79277 | up | Inf         | 2.11E-62 | 1.25E-61  |
| TCONS_00012794 | 0         | 218.49387 | up | Inf         | 3.99E-62 | 2.34E-61  |
| TCONS_00013112 | 0         | 217.90876 | up | Inf         | 4.00E-62 | 2.34E-61  |
| TCONS_00088917 | 0         | 217.78619 | up | Inf         | 4.00E-62 | 2.34E-61  |
| TCONS_00081328 | 92.618578 | 216.08175 | up | 1.222203684 | 5.88E-20 | 8.61E-20  |
| TCONS_00012294 | 0         | 214.48461 | up | Inf         | 5.10E-61 | 2.93E-60  |
| TCONS_00064482 | 0         | 214.48461 | up | Inf         | 5.10E-61 | 2.93E-60  |
| TCONS_00055135 | 0         | 214.40594 | up | Inf         | 5.10E-61 | 2.93E-60  |
| TCONS_00102417 | 118.64504 | 214.18915 | up | 0.852233693 | 1.15E-13 | 1.42E-13  |

|                |           |           |    |             |          |          |
|----------------|-----------|-----------|----|-------------|----------|----------|
| TCONS_00033104 | 131.0902  | 214.17334 | up | 0.708219073 | 1.83E-11 | 2.18E-11 |
| TCONS_00018659 | 33.227758 | 214.13224 | up | 2.688041191 | 2.17E-41 | 7.31E-41 |
| TCONS_00012413 | 0         | 214.10644 | up | Inf         | 5.10E-61 | 2.93E-60 |
| TCONS_00064154 | 0         | 213.55849 | up | Inf         | 5.10E-61 | 2.93E-60 |
| TCONS_00026027 | 8.4752739 | 213.0097  | up | 4.651515315 | 2.69E-55 | 1.36E-54 |
| TCONS_00012985 | 0         | 211.39885 | up | Inf         | 3.45E-60 | 1.94E-59 |
| TCONS_00042982 | 0         | 210.64999 | up | Inf         | 3.45E-60 | 1.94E-59 |
| TCONS_00089057 | 0         | 210.62676 | up | Inf         | 3.45E-60 | 1.94E-59 |
| TCONS_00032924 | 178.79992 | 210.47846 | up | 0.235326488 | 8.21E-05 | 8.88E-05 |
| TCONS_00055295 | 0         | 210.45012 | up | Inf         | 6.52E-60 | 3.64E-59 |
| TCONS_00081822 | 0         | 210.42913 | up | Inf         | 6.52E-60 | 3.64E-59 |
| TCONS_00043609 | 34.727205 | 210.36753 | up | 2.598773853 | 2.24E-39 | 7.03E-39 |
| TCONS_00096846 | 0         | 210.21266 | up | Inf         | 6.52E-60 | 3.64E-59 |
| TCONS_00026101 | 0         | 209.89175 | up | Inf         | 6.52E-60 | 3.64E-59 |
| TCONS_00081730 | 0         | 209.89175 | up | Inf         | 6.52E-60 | 3.64E-59 |
| TCONS_00012028 | 0         | 208.81275 | up | Inf         | 1.23E-59 | 6.83E-59 |
| TCONS_00032752 | 4.1463086 | 208.41897 | up | 5.651515315 | 1.42E-56 | 7.33E-56 |
| TCONS_00043588 | 0         | 208.29071 | up | Inf         | 2.33E-59 | 1.29E-58 |
| TCONS_00064364 | 0         | 206.63761 | up | Inf         | 4.41E-59 | 2.42E-58 |
| TCONS_00089517 | 0         | 206.63761 | up | Inf         | 4.41E-59 | 2.42E-58 |
| TCONS_00044061 | 13.907618 | 206.13969 | up | 3.889675052 | 1.30E-49 | 5.65E-49 |
| TCONS_00018621 | 0         | 205.62963 | up | Inf         | 8.34E-59 | 4.56E-58 |
| TCONS_00064429 | 0         | 205.62963 | up | Inf         | 8.34E-59 | 4.56E-58 |
| TCONS_00081785 | 0         | 204.81702 | up | Inf         | 1.58E-58 | 8.60E-58 |
| TCONS_00055589 | 0         | 204.6882  | up | Inf         | 1.58E-58 | 8.60E-58 |
| TCONS_00055634 | 102.64642 | 204.11764 | up | 0.991717581 | 2.84E-15 | 3.63E-15 |
| TCONS_00072568 | 0         | 203.80696 | up | Inf         | 2.98E-58 | 1.61E-57 |
| TCONS_00043592 | 0         | 203.64287 | up | Inf         | 2.98E-58 | 1.61E-57 |
| TCONS_00055073 | 0         | 203.64287 | up | Inf         | 2.98E-58 | 1.61E-57 |
| TCONS_00096456 | 0         | 203.11137 | up | Inf         | 5.64E-58 | 3.03E-57 |
| TCONS_00089105 | 0         | 202.73879 | up | Inf         | 5.64E-58 | 3.03E-57 |
| TCONS_00064844 | 0         | 202.31465 | up | Inf         | 1.07E-57 | 5.69E-57 |
| TCONS_00009084 | 0         | 202.20333 | up | Inf         | 1.07E-57 | 5.69E-57 |
| TCONS_00043071 | 0         | 202.14549 | up | Inf         | 1.07E-57 | 5.69E-57 |
| TCONS_00013008 | 0         | 201.96255 | up | Inf         | 1.07E-57 | 5.69E-57 |
| TCONS_00072779 | 0         | 201.47167 | up | Inf         | 2.01E-57 | 1.07E-56 |
| TCONS_00012318 | 5.993418  | 200.84404 | up | 5.066552814 | 2.67E-53 | 1.28E-52 |
| TCONS_00043737 | 0         | 200.12934 | up | Inf         | 3.81E-57 | 2.01E-56 |
| TCONS_00043710 | 0         | 199.58169 | up | Inf         | 3.81E-57 | 2.01E-56 |
| TCONS_00019105 | 79.240564 | 199.51218 | up | 1.332165764 | 1.54E-20 | 2.31E-20 |
| TCONS_00011920 | 0         | 199.31004 | up | Inf         | 7.21E-57 | 3.75E-56 |
| TCONS_00013009 | 18.149879 | 198.83997 | up | 3.453575937 | 2.35E-45 | 8.99E-45 |
| TCONS_00081136 | 0         | 198.61285 | up | Inf         | 7.21E-57 | 3.75E-56 |
| TCONS_00072942 | 0         | 197.58178 | up | Inf         | 1.36E-56 | 7.05E-56 |
| TCONS_00043356 | 0         | 197.05839 | up | Inf         | 2.58E-56 | 1.33E-55 |
| TCONS_00096777 | 0         | 196.93982 | up | Inf         | 2.58E-56 | 1.33E-55 |
| TCONS_00018904 | 0         | 196.72511 | up | Inf         | 2.58E-56 | 1.33E-55 |
| TCONS_00055517 | 2.9874024 | 196.36991 | up | 6.038538438 | 6.11E-54 | 2.99E-53 |
| TCONS_00072709 | 0         | 196.2314  | up | Inf         | 4.87E-56 | 2.49E-55 |

|                |           |           |    |             |          |          |
|----------------|-----------|-----------|----|-------------|----------|----------|
| TCONS_00054933 | 0         | 196.01987 | up | Inf         | 4.87E-56 | 2.49E-55 |
| TCONS_00012929 | 77.995426 | 195.46801 | up | 1.325471111 | 8.64E-20 | 1.26E-19 |
| TCONS_00089383 | 0         | 194.39775 | up | Inf         | 1.74E-55 | 8.84E-55 |
| TCONS_00064687 | 0         | 194.37945 | up | Inf         | 1.74E-55 | 8.84E-55 |
| TCONS_00032824 | 51.349302 | 194.13641 | up | 1.918654119 | 1.75E-28 | 3.57E-28 |
| TCONS_00019073 | 0         | 193.86365 | up | Inf         | 1.74E-55 | 8.84E-55 |
| TCONS_00088960 | 4.294391  | 193.72276 | up | 5.495396113 | 1.05E-52 | 4.93E-52 |
| TCONS_00081640 | 0         | 193.21959 | up | Inf         | 3.30E-55 | 1.66E-54 |
| TCONS_00102771 | 2.2370781 | 193.18214 | up | 6.432202286 | 8.42E-54 | 4.10E-53 |
| TCONS_00018661 | 0         | 192.86177 | up | Inf         | 3.30E-55 | 1.66E-54 |
| TCONS_00102317 | 46.480467 | 192.74601 | up | 2.052004505 | 3.22E-30 | 7.12E-30 |
| TCONS_00043679 | 0         | 192.73392 | up | Inf         | 3.30E-55 | 1.66E-54 |
| TCONS_00059570 | 3.3227758 | 192.71902 | up | 5.857966192 | 4.13E-53 | 1.96E-52 |
| TCONS_00043045 | 63.951928 | 192.32753 | up | 1.588505517 | 2.11E-23 | 3.52E-23 |
| TCONS_00043844 | 0         | 192.27243 | up | Inf         | 6.23E-55 | 3.14E-54 |
| TCONS_00026219 | 3.5496073 | 192.15011 | up | 5.758430519 | 3.75E-52 | 1.74E-51 |
| TCONS_00043237 | 0         | 192.0084  | up | Inf         | 6.23E-55 | 3.14E-54 |
| TCONS_00012667 | 4.2469916 | 191.58454 | up | 5.495396113 | 3.75E-52 | 1.74E-51 |
| TCONS_00064987 | 0         | 191.26787 | up | Inf         | 1.18E-54 | 5.88E-54 |
| TCONS_00043502 | 0         | 191.16255 | up | Inf         | 1.18E-54 | 5.88E-54 |
| TCONS_00019097 | 0         | 191.11937 | up | Inf         | 1.18E-54 | 5.88E-54 |
| TCONS_00026187 | 121.89011 | 191.06903 | up | 0.648512826 | 1.53E-09 | 1.76E-09 |
| TCONS_00096611 | 0         | 190.74241 | up | Inf         | 1.18E-54 | 5.88E-54 |
| TCONS_00026035 | 0         | 190.29883 | up | Inf         | 2.23E-54 | 1.10E-53 |
| TCONS_00064166 | 0         | 190.20053 | up | Inf         | 2.23E-54 | 1.10E-53 |
| TCONS_00064852 | 0         | 189.28636 | up | Inf         | 4.21E-54 | 2.07E-53 |
| TCONS_00081462 | 0         | 188.96971 | up | Inf         | 4.21E-54 | 2.07E-53 |
| TCONS_00012883 | 0         | 188.87969 | up | Inf         | 4.21E-54 | 2.07E-53 |
| TCONS_00032647 | 8.0940237 | 188.5819  | up | 4.542190324 | 1.10E-48 | 4.66E-48 |
| TCONS_00088942 | 0         | 188.4535  | up | Inf         | 7.97E-54 | 3.89E-53 |
| TCONS_00055530 | 0         | 188.14475 | up | Inf         | 7.97E-54 | 3.89E-53 |
| TCONS_00072847 | 0         | 187.35144 | up | Inf         | 1.51E-53 | 7.25E-53 |
| TCONS_00073041 | 0         | 187.35144 | up | Inf         | 1.51E-53 | 7.25E-53 |
| TCONS_00089484 | 0         | 186.82305 | up | Inf         | 1.51E-53 | 7.25E-53 |
| TCONS_00081427 | 0         | 186.57571 | up | Inf         | 1.51E-53 | 7.25E-53 |
| TCONS_00089637 | 0         | 186.52245 | up | Inf         | 1.51E-53 | 7.25E-53 |
| TCONS_00054937 | 26.264671 | 186.18543 | up | 2.825544714 | 1.52E-37 | 4.46E-37 |
| TCONS_00064380 | 0         | 185.72288 | up | Inf         | 2.85E-53 | 1.37E-52 |
| TCONS_00064248 | 0         | 185.60265 | up | Inf         | 2.85E-53 | 1.37E-52 |
| TCONS_00018897 | 0         | 185.04861 | up | Inf         | 5.39E-53 | 2.55E-52 |
| TCONS_00089452 | 0         | 184.07892 | up | Inf         | 1.02E-52 | 4.79E-52 |
| TCONS_00102734 | 4.6026009 | 183.89759 | up | 5.320309406 | 2.86E-49 | 1.23E-48 |
| TCONS_00081173 | 3.1695011 | 183.82918 | up | 5.857966192 | 1.27E-50 | 5.73E-50 |
| TCONS_00044022 | 0         | 183.81137 | up | Inf         | 1.02E-52 | 4.79E-52 |
| TCONS_00096486 | 0         | 183.67788 | up | Inf         | 1.02E-52 | 4.79E-52 |
| TCONS_00054983 | 0         | 183.5121  | up | Inf         | 1.02E-52 | 4.79E-52 |
| TCONS_00102468 | 0         | 183.09662 | up | Inf         | 1.93E-52 | 9.01E-52 |
| TCONS_00026012 | 0         | 182.59251 | up | Inf         | 1.93E-52 | 9.01E-52 |
| TCONS_00054432 | 0         | 182.48517 | up | Inf         | 3.65E-52 | 1.70E-51 |

|                |           |           |    |             |          |           |
|----------------|-----------|-----------|----|-------------|----------|-----------|
| TCONS_00018891 | 0         | 181.99276 | up | Inf         | 3.65E-52 | 1.70E-51  |
| TCONS_00053619 | 28.188823 | 181.65944 | up | 2.688041191 | 1.72E-35 | 4.64E-35  |
| TCONS_00072718 | 159.30276 | 181.63051 | up | 0.189235334 | 0.000541 | 0.0005779 |
| TCONS_00073082 | 2.6068932 | 181.4379  | up | 6.121000598 | 8.60E-50 | 3.79E-49  |
| TCONS_00018854 | 0         | 181.09813 | up | Inf         | 6.90E-52 | 3.18E-51  |
| TCONS_00073100 | 1.5590658 | 180.84978 | up | 6.857966192 | 1.76E-50 | 7.86E-50  |
| TCONS_00064481 | 0         | 180.80791 | up | Inf         | 6.90E-52 | 3.18E-51  |
| TCONS_00096566 | 0         | 180.70334 | up | Inf         | 6.90E-52 | 3.18E-51  |
| TCONS_00012530 | 0         | 179.52227 | up | Inf         | 1.31E-51 | 6.01E-51  |
| TCONS_00055475 | 6.2565437 | 179.42193 | up | 4.841846527 | 3.15E-47 | 1.29E-46  |
| TCONS_00043414 | 0         | 179.13831 | up | Inf         | 2.47E-51 | 1.13E-50  |
| TCONS_00089573 | 0         | 178.97746 | up | Inf         | 2.47E-51 | 1.13E-50  |
| TCONS_00096906 | 0         | 178.61895 | up | Inf         | 2.47E-51 | 1.13E-50  |
| TCONS_00055304 | 0         | 178.59702 | up | Inf         | 2.47E-51 | 1.13E-50  |
| TCONS_00013145 | 0         | 178.04285 | up | Inf         | 4.67E-51 | 2.13E-50  |
| TCONS_00055488 | 3.0684006 | 177.96541 | up | 5.857966192 | 5.81E-49 | 2.49E-48  |
| TCONS_00012726 | 0         | 177.66972 | up | Inf         | 4.67E-51 | 2.13E-50  |
| TCONS_00055561 | 70.601364 | 177.44294 | up | 1.32958722  | 4.73E-18 | 6.48E-18  |
| TCONS_00089565 | 0         | 177.11795 | up | Inf         | 8.83E-51 | 3.99E-50  |
| TCONS_00026028 | 0         | 176.39796 | up | Inf         | 1.67E-50 | 7.47E-50  |
| TCONS_00064175 | 4.5589744 | 176.27853 | up | 5.273003691 | 4.64E-47 | 1.88E-46  |
| TCONS_00012135 | 0         | 176.27853 | up | Inf         | 1.67E-50 | 7.47E-50  |
| TCONS_00081673 | 0         | 176.24973 | up | Inf         | 1.67E-50 | 7.47E-50  |
| TCONS_00032765 | 0         | 176.21888 | up | Inf         | 1.67E-50 | 7.47E-50  |
| TCONS_00089343 | 51.598507 | 175.76073 | up | 1.768211539 | 7.21E-24 | 1.23E-23  |
| TCONS_00032766 | 0         | 175.59763 | up | Inf         | 1.67E-50 | 7.47E-50  |
| TCONS_00044111 | 0         | 175.24038 | up | Inf         | 3.16E-50 | 1.40E-49  |
| TCONS_00096788 | 4.2469916 | 175.16301 | up | 5.366113096 | 1.88E-47 | 7.70E-47  |
| TCONS_00019139 | 102.09683 | 174.76813 | up | 0.775504032 | 1.50E-10 | 1.76E-10  |
| TCONS_00054817 | 0         | 174.19038 | up | Inf         | 5.98E-50 | 2.64E-49  |
| TCONS_00043782 | 0         | 173.9122  | up | Inf         | 5.98E-50 | 2.64E-49  |
| TCONS_00081401 | 0         | 173.75229 | up | Inf         | 5.98E-50 | 2.64E-49  |
| TCONS_00081186 | 0         | 173.49097 | up | Inf         | 1.13E-49 | 4.95E-49  |
| TCONS_00012265 | 4.4741562 | 172.99893 | up | 5.273003691 | 6.70E-47 | 2.69E-46  |
| TCONS_00054428 | 0         | 172.99893 | up | Inf         | 1.13E-49 | 4.95E-49  |
| TCONS_00072687 | 0         | 172.99893 | up | Inf         | 1.13E-49 | 4.95E-49  |
| TCONS_00054731 | 7.1255081 | 172.19801 | up | 4.594931786 | 1.20E-44 | 4.51E-44  |
| TCONS_00072896 | 0         | 171.99894 | up | Inf         | 2.14E-49 | 9.25E-49  |
| TCONS_00032628 | 0         | 171.94663 | up | Inf         | 2.14E-49 | 9.25E-49  |
| TCONS_00096622 | 0         | 171.85703 | up | Inf         | 2.14E-49 | 9.25E-49  |
| TCONS_00102374 | 0         | 171.75074 | up | Inf         | 2.14E-49 | 9.25E-49  |
| TCONS_00089459 | 0         | 171.60217 | up | Inf         | 2.14E-49 | 9.25E-49  |
| TCONS_00033079 | 0         | 171.58302 | up | Inf         | 2.14E-49 | 9.25E-49  |
| TCONS_00089247 | 0         | 171.58302 | up | Inf         | 2.14E-49 | 9.25E-49  |
| TCONS_00072984 | 0         | 171.32137 | up | Inf         | 4.05E-49 | 1.74E-48  |
| TCONS_00013154 | 0         | 171.01044 | up | Inf         | 4.05E-49 | 1.74E-48  |
| TCONS_00043813 | 3.0060737 | 170.47603 | up | 5.825544714 | 9.50E-47 | 3.81E-46  |
| TCONS_00026112 | 0         | 170.42277 | up | Inf         | 7.66E-49 | 3.26E-48  |
| TCONS_00026189 | 0         | 170.35773 | up | Inf         | 7.66E-49 | 3.26E-48  |

|                |           |           |    |             |          |          |
|----------------|-----------|-----------|----|-------------|----------|----------|
| TCONS_00055297 | 0         | 170.35773 | up | Inf         | 7.66E-49 | 3.26E-48 |
| TCONS_00012347 | 0         | 170.17215 | up | Inf         | 7.66E-49 | 3.26E-48 |
| TCONS_00089478 | 0         | 170.17215 | up | Inf         | 7.66E-49 | 3.26E-48 |
| TCONS_00096939 | 0         | 170.17215 | up | Inf         | 7.66E-49 | 3.26E-48 |
| TCONS_00032909 | 0         | 170.06458 | up | Inf         | 7.66E-49 | 3.26E-48 |
| TCONS_00055614 | 0         | 170.00954 | up | Inf         | 7.66E-49 | 3.26E-48 |
| TCONS_00043947 | 78.773333 | 169.86588 | up | 1.108616873 | 1.44E-14 | 1.81E-14 |
| TCONS_00081763 | 151.53906 | 169.83913 | up | 0.164479235 | 0.001615 | 0.001716 |
| TCONS_00025953 | 0         | 169.43388 | up | Inf         | 1.45E-48 | 6.10E-48 |
| TCONS_00032691 | 0         | 168.89266 | up | Inf         | 1.45E-48 | 6.10E-48 |
| TCONS_00072572 | 6.3916517 | 168.87991 | up | 4.7236651   | 1.81E-44 | 6.79E-44 |
| TCONS_00018667 | 167.58599 | 168.47805 | up | 0.007659125 | 0.028601 | 0.029503 |
| TCONS_00026201 | 0         | 167.74112 | up | Inf         | 2.74E-48 | 1.15E-47 |
| TCONS_00011926 | 0         | 167.72178 | up | Inf         | 2.74E-48 | 1.15E-47 |
| TCONS_00055487 | 101.25722 | 167.48522 | up | 0.726009041 | 1.80E-09 | 2.06E-09 |
| TCONS_00064913 | 0         | 167.30178 | up | Inf         | 5.18E-48 | 2.15E-47 |
| TCONS_00043600 | 62.348196 | 167.27807 | up | 1.423828594 | 1.43E-18 | 1.99E-18 |
| TCONS_00055505 | 0         | 167.16751 | up | Inf         | 5.18E-48 | 2.15E-47 |
| TCONS_00055558 | 0         | 167.16751 | up | Inf         | 5.18E-48 | 2.15E-47 |
| TCONS_00089577 | 0         | 166.89961 | up | Inf         | 5.18E-48 | 2.15E-47 |
| TCONS_00043384 | 0         | 166.79269 | up | Inf         | 5.18E-48 | 2.15E-47 |
| TCONS_00081334 | 0         | 166.31808 | up | Inf         | 9.81E-48 | 4.05E-47 |
| TCONS_00096507 | 0         | 165.71927 | up | Inf         | 9.81E-48 | 4.05E-47 |
| TCONS_00032937 | 0         | 165.64473 | up | Inf         | 9.81E-48 | 4.05E-47 |
| TCONS_00054534 | 0         | 164.99581 | up | Inf         | 1.86E-47 | 7.62E-47 |
| TCONS_00102686 | 0         | 164.9768  | up | Inf         | 1.86E-47 | 7.62E-47 |
| TCONS_00064699 | 0         | 164.90292 | up | Inf         | 1.86E-47 | 7.62E-47 |
| TCONS_00054624 | 0         | 164.66435 | up | Inf         | 1.86E-47 | 7.62E-47 |
| TCONS_00081757 | 0         | 164.42133 | up | Inf         | 3.51E-47 | 1.43E-46 |
| TCONS_00064977 | 2.8334126 | 164.33625 | up | 5.857966192 | 4.34E-45 | 1.65E-44 |
| TCONS_00096699 | 0         | 164.25041 | up | Inf         | 3.51E-47 | 1.43E-46 |
| TCONS_00089167 | 0         | 164.09458 | up | Inf         | 3.51E-47 | 1.43E-46 |
| TCONS_00054536 | 0         | 163.97694 | up | Inf         | 3.51E-47 | 1.43E-46 |
| TCONS_00026015 | 0         | 163.82081 | up | Inf         | 3.51E-47 | 1.43E-46 |
| TCONS_00012130 | 0         | 163.79348 | up | Inf         | 3.51E-47 | 1.43E-46 |
| TCONS_00043262 | 2.0466885 | 163.55147 | up | 6.320309406 | 8.92E-46 | 3.47E-45 |
| TCONS_00054843 | 0         | 163.44969 | up | Inf         | 6.64E-47 | 2.67E-46 |
| TCONS_00033187 | 0         | 163.43157 | up | Inf         | 6.64E-47 | 2.67E-46 |
| TCONS_00012115 | 0         | 163.29411 | up | Inf         | 6.64E-47 | 2.67E-46 |
| TCONS_00096945 | 0         | 163.26923 | up | Inf         | 6.64E-47 | 2.67E-46 |
| TCONS_00072532 | 2.1049094 | 162.77799 | up | 6.273003691 | 1.69E-45 | 6.50E-45 |
| TCONS_00102598 | 93.782801 | 162.31701 | up | 0.79141893  | 5.98E-10 | 6.93E-10 |
| TCONS_00072696 | 0         | 161.95921 | up | Inf         | 1.26E-46 | 4.99E-46 |
| TCONS_00064841 | 0         | 161.71639 | up | Inf         | 1.26E-46 | 4.99E-46 |
| TCONS_00064709 | 0         | 161.52659 | up | Inf         | 1.26E-46 | 4.99E-46 |
| TCONS_00043881 | 4.3136484 | 161.23294 | up | 5.224094091 | 1.39E-43 | 5.03E-43 |
| TCONS_00088953 | 0         | 160.95983 | up | Inf         | 2.38E-46 | 9.42E-46 |
| TCONS_00096888 | 6.0882506 | 160.86346 | up | 4.7236651   | 2.93E-42 | 1.01E-41 |
| TCONS_00013082 | 14.251016 | 160.71814 | up | 3.495396113 | 2.38E-37 | 6.92E-37 |



|                |           |           |    |             |          |           |
|----------------|-----------|-----------|----|-------------|----------|-----------|
| TCONS_00072762 | 0         | 160.57983 | up | Inf         | 2.38E-46 | 9.42E-46  |
| TCONS_00064556 | 0         | 160.44803 | up | Inf         | 4.50E-46 | 1.77E-45  |
| TCONS_00032809 | 59.57392  | 160.34175 | up | 1.428397374 | 1.12E-17 | 1.51E-17  |
| TCONS_00089228 | 2.7642057 | 160.32229 | up | 5.857966192 | 5.55E-44 | 2.04E-43  |
| TCONS_00073035 | 0         | 160.32229 | up | Inf         | 4.50E-46 | 1.77E-45  |
| TCONS_00026232 | 0         | 159.97751 | up | Inf         | 4.50E-46 | 1.77E-45  |
| TCONS_00096372 | 0         | 158.75817 | up | Inf         | 8.51E-46 | 3.32E-45  |
| TCONS_00054800 | 64.397897 | 158.73919 | up | 1.301572844 | 2.61E-16 | 3.40E-16  |
| TCONS_00072805 | 0         | 158.65068 | up | Inf         | 8.51E-46 | 3.32E-45  |
| TCONS_00054857 | 0         | 158.61309 | up | Inf         | 8.51E-46 | 3.32E-45  |
| TCONS_00012299 | 0         | 158.44418 | up | Inf         | 1.61E-45 | 6.21E-45  |
| TCONS_00072974 | 0         | 158.37189 | up | Inf         | 1.61E-45 | 6.21E-45  |
| TCONS_00081431 | 16.373508 | 158.27562 | up | 3.273003691 | 2.12E-35 | 5.67E-35  |
| TCONS_00064893 | 0         | 158.21441 | up | Inf         | 1.61E-45 | 6.21E-45  |
| TCONS_00013016 | 0         | 157.796   | up | Inf         | 1.61E-45 | 6.21E-45  |
| TCONS_00044200 | 0         | 157.64107 | up | Inf         | 1.61E-45 | 6.21E-45  |
| TCONS_00064428 | 0         | 157.56982 | up | Inf         | 1.61E-45 | 6.21E-45  |
| TCONS_00102385 | 0         | 157.51244 | up | Inf         | 1.61E-45 | 6.21E-45  |
| TCONS_00064355 | 2.4414812 | 157.33828 | up | 6.009969286 | 7.74E-44 | 2.80E-43  |
| TCONS_00033020 | 0         | 157.29132 | up | Inf         | 3.05E-45 | 1.16E-44  |
| TCONS_00043215 | 0         | 157.22427 | up | Inf         | 3.05E-45 | 1.16E-44  |
| TCONS_00012937 | 0         | 157.08199 | up | Inf         | 3.05E-45 | 1.16E-44  |
| TCONS_00025793 | 0         | 157.08199 | up | Inf         | 3.05E-45 | 1.16E-44  |
| TCONS_00043522 | 0         | 156.82759 | up | Inf         | 3.05E-45 | 1.16E-44  |
| TCONS_00012267 | 86.291998 | 156.80148 | up | 0.861640513 | 1.13E-10 | 1.32E-10  |
| TCONS_00012898 | 5.5284114 | 156.75957 | up | 4.825544714 | 3.71E-41 | 1.23E-40  |
| TCONS_00012221 | 0         | 156.70659 | up | Inf         | 3.05E-45 | 1.16E-44  |
| TCONS_00072503 | 1.6642623 | 156.58698 | up | 6.555937655 | 7.74E-44 | 2.80E-43  |
| TCONS_00072491 | 0         | 156.28055 | up | Inf         | 5.77E-45 | 2.18E-44  |
| TCONS_00054457 | 0         | 156.2382  | up | Inf         | 5.77E-45 | 2.18E-44  |
| TCONS_00088992 | 4.3136484 | 155.67318 | up | 5.173468018 | 3.36E-42 | 1.16E-41  |
| TCONS_00055325 | 0         | 155.67318 | up | Inf         | 5.77E-45 | 2.18E-44  |
| TCONS_00081580 | 0         | 155.64911 | up | Inf         | 5.77E-45 | 2.18E-44  |
| TCONS_00096643 | 138.27939 | 154.97821 | up | 0.164479235 | 0.002332 | 0.0024736 |
| TCONS_00043832 | 13.360328 | 154.97821 | up | 3.536038097 | 2.67E-36 | 7.45E-36  |
| TCONS_00039968 | 7.0731146 | 154.97821 | up | 4.453575937 | 5.83E-40 | 1.86E-39  |
| TCONS_00012435 | 0         | 154.97821 | up | Inf         | 1.09E-44 | 4.09E-44  |
| TCONS_00065007 | 0         | 154.97821 | up | Inf         | 1.09E-44 | 4.09E-44  |
| TCONS_00073118 | 0         | 154.97821 | up | Inf         | 1.09E-44 | 4.09E-44  |
| TCONS_00096822 | 0         | 154.97821 | up | Inf         | 1.09E-44 | 4.09E-44  |
| TCONS_00018586 | 0         | 154.643   | up | Inf         | 1.09E-44 | 4.09E-44  |
| TCONS_00035781 | 0         | 154.4564  | up | Inf         | 2.06E-44 | 7.68E-44  |
| TCONS_00043530 | 0         | 154.41052 | up | Inf         | 2.06E-44 | 7.68E-44  |
| TCONS_00064760 | 7.4859423 | 154.37518 | up | 4.366113096 | 1.10E-39 | 3.49E-39  |
| TCONS_00081001 | 0         | 154.37518 | up | Inf         | 2.06E-44 | 7.68E-44  |
| TCONS_00096439 | 0         | 154.33515 | up | Inf         | 2.06E-44 | 7.68E-44  |
| TCONS_00064276 | 0         | 153.75147 | up | Inf         | 2.06E-44 | 7.68E-44  |
| TCONS_00096679 | 0         | 153.6974  | up | Inf         | 2.06E-44 | 7.68E-44  |
| TCONS_00055610 | 0         | 153.44377 | up | Inf         | 3.91E-44 | 1.44E-43  |

|                |            |            |    |              |           |           |
|----------------|------------|------------|----|--------------|-----------|-----------|
| TCONS_00026082 | 3. 602785  | 153. 23688 | up | 5. 410507215 | 2. 27E-41 | 7. 64E-41 |
| TCONS_00012793 | 0          | 153. 1831  | up | Inf          | 3. 91E-44 | 1. 44E-43 |
| TCONS_00025872 | 0          | 153. 111   | up | Inf          | 3. 91E-44 | 1. 44E-43 |
| TCONS_00026001 | 0          | 153. 10196 | up | Inf          | 3. 91E-44 | 1. 44E-43 |
| TCONS_00102597 | 76. 005419 | 153. 0649  | up | 1. 009969286 | 4. 16E-12 | 4. 99E-12 |
| TCONS_00096633 | 0          | 152. 9862  | up | Inf          | 3. 91E-44 | 1. 44E-43 |
| TCONS_00096823 | 0          | 152. 94438 | up | Inf          | 3. 91E-44 | 1. 44E-43 |
| TCONS_00043425 | 2. 1568242 | 152. 8933  | up | 6. 147472809 | 9. 91E-43 | 3. 47E-42 |
| TCONS_00102737 | 0          | 152. 85522 | up | Inf          | 3. 91E-44 | 1. 44E-43 |
| TCONS_00081213 | 0          | 152. 79542 | up | Inf          | 3. 91E-44 | 1. 44E-43 |
| TCONS_00044046 | 0          | 152. 59393 | up | Inf          | 3. 91E-44 | 1. 44E-43 |
| TCONS_00044184 | 0          | 152. 59393 | up | Inf          | 3. 91E-44 | 1. 44E-43 |
| TCONS_00081436 | 0          | 152. 41894 | up | Inf          | 7. 39E-44 | 2. 68E-43 |
| TCONS_00055348 | 0          | 152. 16042 | up | Inf          | 7. 39E-44 | 2. 68E-43 |
| TCONS_00089450 | 0          | 152. 05409 | up | Inf          | 7. 39E-44 | 2. 68E-43 |
| TCONS_00043397 | 0          | 152. 00928 | up | Inf          | 7. 39E-44 | 2. 68E-43 |
| TCONS_00054951 | 0          | 152. 00928 | up | Inf          | 7. 39E-44 | 2. 68E-43 |
| TCONS_00081374 | 0          | 152. 00928 | up | Inf          | 7. 39E-44 | 2. 68E-43 |
| TCONS_00043765 | 0          | 151. 95635 | up | Inf          | 7. 39E-44 | 2. 68E-43 |
| TCONS_00064817 | 0          | 151. 6808  | up | Inf          | 7. 39E-44 | 2. 68E-43 |
| TCONS_00019003 | 0          | 151. 34022 | up | Inf          | 1. 40E-43 | 5. 03E-43 |
| TCONS_00072875 | 0          | 151. 2706  | up | Inf          | 1. 40E-43 | 5. 03E-43 |
| TCONS_00043854 | 0          | 151. 19825 | up | Inf          | 1. 40E-43 | 5. 03E-43 |
| TCONS_00072676 | 0          | 151. 19825 | up | Inf          | 1. 40E-43 | 5. 03E-43 |
| TCONS_00055340 | 0          | 151. 0712  | up | Inf          | 1. 40E-43 | 5. 03E-43 |
| TCONS_00055503 | 0          | 150. 55026 | up | Inf          | 1. 40E-43 | 5. 03E-43 |
| TCONS_00032706 | 0          | 150. 46428 | up | Inf          | 2. 65E-43 | 9. 43E-43 |
| TCONS_00096357 | 4. 323342  | 150. 45076 | up | 5. 121000598 | 1. 53E-40 | 5. 00E-40 |
| TCONS_00072559 | 0          | 150. 1519  | up | Inf          | 2. 65E-43 | 9. 43E-43 |
| TCONS_00018767 | 0          | 150. 13514 | up | Inf          | 2. 65E-43 | 9. 43E-43 |
| TCONS_00026065 | 1. 2254058 | 150. 0426  | up | 6. 935968704 | 1. 35E-42 | 4. 72E-42 |
| TCONS_00102285 | 0          | 149. 97891 | up | Inf          | 2. 65E-43 | 9. 43E-43 |
| TCONS_00033189 | 59. 135876 | 149. 89696 | up | 1. 34186555  | 7. 27E-16 | 9. 42E-16 |
| TCONS_00018786 | 0          | 149. 63413 | up | Inf          | 2. 65E-43 | 9. 43E-43 |
| TCONS_00054555 | 0          | 149. 48253 | up | Inf          | 5. 01E-43 | 1. 77E-42 |
| TCONS_00064271 | 0          | 149. 44327 | up | Inf          | 5. 01E-43 | 1. 77E-42 |
| TCONS_00033161 | 0          | 149. 23828 | up | Inf          | 5. 01E-43 | 1. 77E-42 |
| TCONS_00011777 | 0          | 149. 01751 | up | Inf          | 5. 01E-43 | 1. 77E-42 |
| TCONS_00018797 | 4. 2753048 | 148. 77908 | up | 5. 121000598 | 2. 90E-40 | 9. 37E-40 |
| TCONS_00026318 | 2. 9598264 | 148. 77908 | up | 5. 651515315 | 6. 14E-41 | 2. 02E-40 |
| TCONS_00064751 | 0          | 148. 59334 | up | Inf          | 5. 01E-43 | 1. 77E-42 |
| TCONS_00043323 | 0          | 148. 55054 | up | Inf          | 5. 01E-43 | 1. 77E-42 |
| TCONS_00054671 | 0          | 148. 55054 | up | Inf          | 5. 01E-43 | 1. 77E-42 |
| TCONS_00081007 | 0          | 148. 33129 | up | Inf          | 9. 48E-43 | 3. 33E-42 |
| TCONS_00072889 | 0          | 148. 12077 | up | Inf          | 9. 48E-43 | 3. 33E-42 |
| TCONS_00032666 | 0          | 148. 00687 | up | Inf          | 9. 48E-43 | 3. 33E-42 |
| TCONS_00055631 | 0          | 147. 93375 | up | Inf          | 9. 48E-43 | 3. 33E-42 |
| TCONS_00013094 | 0          | 147. 86912 | up | Inf          | 9. 48E-43 | 3. 33E-42 |
| TCONS_00081726 | 0          | 147. 86912 | up | Inf          | 9. 48E-43 | 3. 33E-42 |

|                |           |           |    |             |          |          |
|----------------|-----------|-----------|----|-------------|----------|----------|
| TCONS_00054452 | 0         | 147.5983  | up | Inf         | 9.48E-43 | 3.33E-42 |
| TCONS_00072897 | 0         | 147.5983  | up | Inf         | 9.48E-43 | 3.33E-42 |
| TCONS_00033101 | 0         | 147.30602 | up | Inf         | 1.79E-42 | 6.24E-42 |
| TCONS_00081284 | 0         | 147.03061 | up | Inf         | 1.79E-42 | 6.24E-42 |
| TCONS_00013024 | 0         | 146.75488 | up | Inf         | 1.79E-42 | 6.24E-42 |
| TCONS_00064744 | 0         | 146.69693 | up | Inf         | 1.79E-42 | 6.24E-42 |
| TCONS_00054569 | 0         | 146.58038 | up | Inf         | 1.79E-42 | 6.24E-42 |
| TCONS_00081755 | 95.839398 | 146.40008 | up | 0.611225594 | 3.49E-07 | 3.89E-07 |
| TCONS_00064148 | 0         | 146.40008 | up | Inf         | 3.40E-42 | 1.17E-41 |
| TCONS_00012587 | 0         | 146.18032 | up | Inf         | 3.40E-42 | 1.17E-41 |
| TCONS_00081594 | 0         | 146.15831 | up | Inf         | 3.40E-42 | 1.17E-41 |
| TCONS_00012339 | 0         | 145.86184 | up | Inf         | 3.40E-42 | 1.17E-41 |
| TCONS_00013028 | 0         | 145.86184 | up | Inf         | 3.40E-42 | 1.17E-41 |
| TCONS_00072701 | 0         | 145.86184 | up | Inf         | 3.40E-42 | 1.17E-41 |
| TCONS_00043631 | 100.89101 | 145.72996 | up | 0.530499914 | 1.93E-06 | 2.13E-06 |
| TCONS_00102811 | 0         | 145.58559 | up | Inf         | 3.40E-42 | 1.17E-41 |
| TCONS_00054548 | 0         | 145.462   | up | Inf         | 6.43E-42 | 2.19E-41 |
| TCONS_00096406 | 1.3586774 | 145.3468  | up | 6.741152527 | 3.28E-41 | 1.09E-40 |
| TCONS_00043833 | 0         | 145.16193 | up | Inf         | 6.43E-42 | 2.19E-41 |
| TCONS_00072916 | 0         | 144.91469 | up | Inf         | 6.43E-42 | 2.19E-41 |
| TCONS_00088989 | 0         | 144.64633 | up | Inf         | 6.43E-42 | 2.19E-41 |
| TCONS_00025970 | 0         | 144.44571 | up | Inf         | 1.22E-41 | 4.11E-41 |
| TCONS_00081142 | 0         | 144.24565 | up | Inf         | 1.22E-41 | 4.11E-41 |
| TCONS_00018840 | 4.6583225 | 144.09596 | up | 4.951075596 | 3.21E-38 | 9.56E-38 |
| TCONS_00055526 | 0         | 143.74791 | up | Inf         | 1.22E-41 | 4.11E-41 |
| TCONS_00096735 | 0         | 143.74791 | up | Inf         | 1.22E-41 | 4.11E-41 |
| TCONS_00018972 | 69.433522 | 143.55876 | up | 1.047937136 | 4.57E-12 | 5.48E-12 |
| TCONS_00012747 | 0         | 143.47328 | up | Inf         | 2.30E-41 | 7.69E-41 |
| TCONS_00089486 | 0         | 143.35484 | up | Inf         | 2.30E-41 | 7.69E-41 |
| TCONS_00060508 | 36.202178 | 143.31318 | up | 1.985022928 | 4.81E-22 | 7.64E-22 |
| TCONS_00054633 | 0         | 143.26875 | up | Inf         | 2.30E-41 | 7.69E-41 |
| TCONS_00064979 | 0         | 143.26875 | up | Inf         | 2.30E-41 | 7.69E-41 |
| TCONS_00072422 | 0         | 143.18197 | up | Inf         | 2.30E-41 | 7.69E-41 |
| TCONS_00054571 | 0         | 143.05681 | up | Inf         | 2.30E-41 | 7.69E-41 |
| TCONS_00081091 | 0         | 143.05681 | up | Inf         | 2.30E-41 | 7.69E-41 |
| TCONS_00043791 | 0         | 142.92897 | up | Inf         | 2.30E-41 | 7.69E-41 |
| TCONS_00012991 | 5.993418  | 142.90826 | up | 4.575566461 | 2.70E-37 | 7.87E-37 |
| TCONS_00043309 | 0         | 142.86057 | up | Inf         | 2.30E-41 | 7.69E-41 |
| TCONS_00081103 | 0         | 142.69094 | up | Inf         | 2.30E-41 | 7.69E-41 |
| TCONS_00089047 | 0         | 142.5087  | up | Inf         | 2.30E-41 | 7.69E-41 |
| TCONS_00096879 | 0         | 142.38281 | up | Inf         | 4.36E-41 | 1.44E-40 |
| TCONS_00043056 | 0         | 142.37233 | up | Inf         | 4.36E-41 | 1.44E-40 |
| TCONS_00064192 | 0         | 142.31995 | up | Inf         | 4.36E-41 | 1.44E-40 |
| TCONS_00054881 | 0         | 142.11441 | up | Inf         | 4.36E-41 | 1.44E-40 |
| TCONS_00054606 | 0         | 142.10036 | up | Inf         | 4.36E-41 | 1.44E-40 |
| TCONS_00012064 | 0         | 141.82508 | up | Inf         | 4.36E-41 | 1.44E-40 |
| TCONS_00013104 | 3.1436065 | 141.81013 | up | 5.495396113 | 5.32E-39 | 1.65E-38 |
| TCONS_00072910 | 0         | 141.53261 | up | Inf         | 4.36E-41 | 1.44E-40 |
| TCONS_00043800 | 0         | 141.45662 | up | Inf         | 8.25E-41 | 2.70E-40 |

|                |           |           |    |             |          |           |
|----------------|-----------|-----------|----|-------------|----------|-----------|
| TCONS_00102586 | 0         | 141.38363 | up | Inf         | 8.25E-41 | 2.70E-40  |
| TCONS_00044003 | 0         | 141.16827 | up | Inf         | 8.25E-41 | 2.70E-40  |
| TCONS_00081109 | 0         | 141.16827 | up | Inf         | 8.25E-41 | 2.70E-40  |
| TCONS_00089034 | 0         | 141.16827 | up | Inf         | 8.25E-41 | 2.70E-40  |
| TCONS_00096585 | 0         | 141.16827 | up | Inf         | 8.25E-41 | 2.70E-40  |
| TCONS_00102499 | 0         | 141.16827 | up | Inf         | 8.25E-41 | 2.70E-40  |
| TCONS_00042987 | 52.46965  | 140.88928 | up | 1.425006785 | 5.02E-16 | 6.51E-16  |
| TCONS_00096661 | 0         | 140.88928 | up | Inf         | 8.25E-41 | 2.70E-40  |
| TCONS_00026019 | 67.06778  | 140.77702 | up | 1.069720093 | 5.59E-12 | 6.70E-12  |
| TCONS_00012102 | 0         | 140.76623 | up | Inf         | 8.25E-41 | 2.70E-40  |
| TCONS_00033158 | 0         | 140.47286 | up | Inf         | 1.56E-40 | 5.07E-40  |
| TCONS_00044040 | 0         | 140.47286 | up | Inf         | 1.56E-40 | 5.07E-40  |
| TCONS_00096967 | 0         | 140.47286 | up | Inf         | 1.56E-40 | 5.07E-40  |
| TCONS_00055472 | 0         | 140.25177 | up | Inf         | 1.56E-40 | 5.07E-40  |
| TCONS_00081777 | 0         | 140.23735 | up | Inf         | 1.56E-40 | 5.07E-40  |
| TCONS_00089210 | 13.742051 | 140.21838 | up | 3.351006203 | 1.16E-31 | 2.73E-31  |
| TCONS_00089662 | 0         | 140.15421 | up | Inf         | 1.56E-40 | 5.07E-40  |
| TCONS_00054912 | 2.7173548 | 140.0933  | up | 5.688041191 | 1.90E-38 | 5.72E-38  |
| TCONS_00054627 | 0         | 139.69867 | up | Inf         | 1.56E-40 | 5.07E-40  |
| TCONS_00018874 | 2.5789372 | 139.60504 | up | 5.758430519 | 1.90E-38 | 5.72E-38  |
| TCONS_00064597 | 0         | 139.36025 | up | Inf         | 2.96E-40 | 9.52E-40  |
| TCONS_00012198 | 0         | 139.23176 | up | Inf         | 2.96E-40 | 9.52E-40  |
| TCONS_00043583 | 0         | 139.23176 | up | Inf         | 2.96E-40 | 9.52E-40  |
| TCONS_00032641 | 0         | 139.10239 | up | Inf         | 2.96E-40 | 9.52E-40  |
| TCONS_00064961 | 26.945199 | 138.91604 | up | 2.366113096 | 7.55E-25 | 1.33E-24  |
| TCONS_00054645 | 0         | 138.91604 | up | Inf         | 2.96E-40 | 9.52E-40  |
| TCONS_00043331 | 21.208205 | 138.62618 | up | 2.708505293 | 1.08E-27 | 2.13E-27  |
| TCONS_00011956 | 0         | 138.54786 | up | Inf         | 2.96E-40 | 9.52E-40  |
| TCONS_00026072 | 6.6112961 | 138.4685  | up | 4.388480909 | 2.80E-35 | 7.48E-35  |
| TCONS_00043152 | 0         | 138.42714 | up | Inf         | 5.60E-40 | 1.79E-39  |
| TCONS_00081658 | 0         | 138.34965 | up | Inf         | 5.60E-40 | 1.79E-39  |
| TCONS_00089629 | 0         | 138.21008 | up | Inf         | 5.60E-40 | 1.79E-39  |
| TCONS_00102645 | 1.3231686 | 138.13739 | up | 6.705963099 | 2.85E-39 | 8.95E-39  |
| TCONS_00026261 | 39.905957 | 138.05919 | up | 1.790610924 | 2.45E-19 | 3.51E-19  |
| TCONS_00096549 | 0         | 138.05919 | up | Inf         | 5.60E-40 | 1.79E-39  |
| TCONS_00064500 | 106.88262 | 137.75841 | up | 0.366113096 | 0.000112 | 0.0001204 |
| TCONS_00043536 | 0         | 137.75841 | up | Inf         | 5.60E-40 | 1.79E-39  |
| TCONS_00055008 | 0         | 137.75841 | up | Inf         | 5.60E-40 | 1.79E-39  |
| TCONS_00064712 | 0         | 137.75841 | up | Inf         | 5.60E-40 | 1.79E-39  |
| TCONS_00072739 | 0         | 137.75841 | up | Inf         | 5.60E-40 | 1.79E-39  |
| TCONS_00073034 | 0         | 137.75841 | up | Inf         | 5.60E-40 | 1.79E-39  |
| TCONS_00089579 | 1.2707313 | 137.57643 | up | 6.758430519 | 2.85E-39 | 8.95E-39  |
| TCONS_00055453 | 0         | 137.26641 | up | Inf         | 1.06E-39 | 3.36E-39  |
| TCONS_00025991 | 55.333038 | 137.14886 | up | 1.309529567 | 2.64E-14 | 3.31E-14  |
| TCONS_00072562 | 2.1495946 | 137.14273 | up | 5.995469716 | 2.68E-38 | 7.99E-38  |
| TCONS_00089610 | 0         | 136.8461  | up | Inf         | 1.06E-39 | 3.36E-39  |
| TCONS_00102661 | 0         | 136.54468 | up | Inf         | 1.06E-39 | 3.36E-39  |
| TCONS_00064534 | 0         | 136.38082 | up | Inf         | 2.01E-39 | 6.31E-39  |
| TCONS_00081644 | 0         | 136.01463 | up | Inf         | 2.01E-39 | 6.31E-39  |

|                |           |              |             |          |           |
|----------------|-----------|--------------|-------------|----------|-----------|
| TCONS_00033049 | 0         | 135.79043 up | Inf         | 2.01E-39 | 6.31E-39  |
| TCONS_00073129 | 0         | 135.74734 up | Inf         | 2.01E-39 | 6.31E-39  |
| TCONS_00031705 | 19.472542 | 135.5275 up  | 2.799072503 | 6.55E-28 | 1.31E-27  |
| TCONS_00064326 | 0         | 135.5275 up  | Inf         | 2.01E-39 | 6.31E-39  |
| TCONS_00076140 | 43.112318 | 135.44314 up | 1.651515315 | 1.37E-17 | 1.84E-17  |
| TCONS_00026125 | 0         | 135.25371 up | Inf         | 3.80E-39 | 1.18E-38  |
| TCONS_00043074 | 0         | 135.03052 up | Inf         | 3.80E-39 | 1.18E-38  |
| TCONS_00043678 | 0         | 135.03052 up | Inf         | 3.80E-39 | 1.18E-38  |
| TCONS_00055227 | 0         | 134.96837 up | Inf         | 3.80E-39 | 1.18E-38  |
| TCONS_00055397 | 0         | 134.85823 up | Inf         | 3.80E-39 | 1.18E-38  |
| TCONS_00032634 | 0         | 134.66271 up | Inf         | 3.80E-39 | 1.18E-38  |
| TCONS_00102355 | 0         | 134.59881 up | Inf         | 3.80E-39 | 1.18E-38  |
| TCONS_00072865 | 0         | 134.52654 up | Inf         | 3.80E-39 | 1.18E-38  |
| TCONS_00012857 | 0         | 134.36534 up | Inf         | 7.19E-39 | 2.19E-38  |
| TCONS_00018864 | 0         | 134.36534 up | Inf         | 7.19E-39 | 2.19E-38  |
| TCONS_00043873 | 0         | 134.36534 up | Inf         | 7.19E-39 | 2.19E-38  |
| TCONS_00081269 | 0         | 134.36534 up | Inf         | 7.19E-39 | 2.19E-38  |
| TCONS_00081711 | 0         | 134.36534 up | Inf         | 7.19E-39 | 2.19E-38  |
| TCONS_00032763 | 128.0606  | 134.34644 up | 0.069131358 | 0.021098 | 0.0218846 |
| TCONS_00043320 | 2.9781535 | 134.34644 up | 5.495396113 | 8.72E-37 | 2.48E-36  |
| TCONS_00043174 | 0         | 134.31445 up | Inf         | 7.19E-39 | 2.19E-38  |
| TCONS_00032646 | 30.921128 | 134.3008 up  | 2.118803042 | 7.28E-22 | 1.14E-21  |
| TCONS_00064123 | 0         | 134.28842 up | Inf         | 7.19E-39 | 2.19E-38  |
| TCONS_00081438 | 0         | 134.10359 up | Inf         | 7.19E-39 | 2.19E-38  |
| TCONS_00096800 | 0         | 133.91845 up | Inf         | 7.19E-39 | 2.19E-38  |
| TCONS_00042975 | 0         | 133.82245 up | Inf         | 7.19E-39 | 2.19E-38  |
| TCONS_00012618 | 0         | 133.79414 up | Inf         | 7.19E-39 | 2.19E-38  |
| TCONS_00089207 | 0         | 133.75713 up | Inf         | 7.19E-39 | 2.19E-38  |
| TCONS_00033060 | 0         | 133.70669 up | Inf         | 7.19E-39 | 2.19E-38  |
| TCONS_00055407 | 0         | 133.70669 up | Inf         | 7.19E-39 | 2.19E-38  |
| TCONS_00081003 | 0         | 133.70669 up | Inf         | 7.19E-39 | 2.19E-38  |
| TCONS_00102600 | 0         | 133.70669 up | Inf         | 7.19E-39 | 2.19E-38  |
| TCONS_00013081 | 0         | 133.67393 up | Inf         | 7.19E-39 | 2.19E-38  |
| TCONS_00018784 | 0         | 133.63391 up | Inf         | 7.19E-39 | 2.19E-38  |
| TCONS_00019080 | 24.178115 | 133.55393 up | 2.465648769 | 6.06E-25 | 1.07E-24  |
| TCONS_00013134 | 0         | 133.51969 up | Inf         | 7.19E-39 | 2.19E-38  |
| TCONS_00081311 | 6.0882506 | 133.39897 up | 4.453575937 | 1.55E-34 | 4.05E-34  |
| TCONS_00096448 | 0         | 133.3677 up  | Inf         | 1.36E-38 | 4.11E-38  |
| TCONS_00081216 | 131.6014  | 133.27116 up | 0.018189792 | 0.044878 | 0.046185  |
| TCONS_00012519 | 0         | 133.25229 up | Inf         | 1.36E-38 | 4.11E-38  |
| TCONS_00102697 | 0         | 133.25229 up | Inf         | 1.36E-38 | 4.11E-38  |
| TCONS_00072700 | 0         | 133.235 up   | Inf         | 1.36E-38 | 4.11E-38  |
| TCONS_00089444 | 0         | 133.16646 up | Inf         | 1.36E-38 | 4.11E-38  |
| TCONS_00025853 | 0         | 133.02851 up | Inf         | 1.36E-38 | 4.11E-38  |
| TCONS_00055245 | 0         | 132.94168 up | Inf         | 1.36E-38 | 4.11E-38  |
| TCONS_00064412 | 2.6427022 | 132.83847 up | 5.651515315 | 1.65E-36 | 4.66E-36  |
| TCONS_00055408 | 10.712067 | 132.54261 up | 3.629147502 | 1.77E-31 | 4.12E-31  |
| TCONS_00055136 | 0         | 132.50045 up | Inf         | 1.36E-38 | 4.11E-38  |
| TCONS_00055393 | 0         | 132.48797 up | Inf         | 2.58E-38 | 7.69E-38  |

|                |           |           |    |             |          |           |
|----------------|-----------|-----------|----|-------------|----------|-----------|
| TCONS_00043136 | 0         | 132.40857 | up | Inf         | 2.58E-38 | 7.69E-38  |
| TCONS_00054659 | 0         | 132.40857 | up | Inf         | 2.58E-38 | 7.69E-38  |
| TCONS_00064581 | 0         | 132.17758 | up | Inf         | 2.58E-38 | 7.69E-38  |
| TCONS_00054414 | 0         | 132.14443 | up | Inf         | 2.58E-38 | 7.69E-38  |
| TCONS_00043357 | 0         | 131.89635 | up | Inf         | 2.58E-38 | 7.69E-38  |
| TCONS_00012480 | 9.2791986 | 131.55707 | up | 3.825544714 | 2.15E-32 | 5.17E-32  |
| TCONS_00033085 | 63.866207 | 131.53524 | up | 1.042324659 | 5.25E-11 | 6.19E-11  |
| TCONS_00025844 | 0         | 131.00045 | up | Inf         | 4.88E-38 | 1.44E-37  |
| TCONS_00018806 | 0         | 130.64279 | up | Inf         | 4.88E-38 | 1.44E-37  |
| TCONS_00043250 | 0         | 130.50797 | up | Inf         | 4.88E-38 | 1.44E-37  |
| TCONS_00043371 | 0         | 130.50797 | up | Inf         | 4.88E-38 | 1.44E-37  |
| TCONS_00102445 | 0         | 130.50797 | up | Inf         | 4.88E-38 | 1.44E-37  |
| TCONS_00011974 | 0         | 130.31201 | up | Inf         | 9.23E-38 | 2.72E-37  |
| TCONS_00072939 | 0         | 130.28677 | up | Inf         | 9.23E-38 | 2.72E-37  |
| TCONS_00033155 | 0         | 130.21    | up | Inf         | 9.23E-38 | 2.72E-37  |
| TCONS_00054522 | 3.8788048 | 129.98172 | up | 5.066552814 | 5.21E-35 | 1.39E-34  |
| TCONS_00043463 | 0         | 129.8865  | up | Inf         | 9.23E-38 | 2.72E-37  |
| TCONS_00064739 | 0         | 129.8865  | up | Inf         | 9.23E-38 | 2.72E-37  |
| TCONS_00012327 | 0         | 129.82468 | up | Inf         | 9.23E-38 | 2.72E-37  |
| TCONS_00102280 | 4.785789  | 129.53403 | up | 4.758430519 | 2.36E-34 | 6.14E-34  |
| TCONS_00102770 | 0         | 129.37311 | up | Inf         | 1.75E-37 | 5.10E-37  |
| TCONS_00032821 | 110.14621 | 129.34568 | up | 0.231812004 | 0.002043 | 0.0021691 |
| TCONS_00054794 | 0         | 129.06703 | up | Inf         | 1.75E-37 | 5.10E-37  |
| TCONS_00018747 | 0         | 128.94187 | up | Inf         | 1.75E-37 | 5.10E-37  |
| TCONS_00081539 | 0         | 128.94187 | up | Inf         | 1.75E-37 | 5.10E-37  |
| TCONS_00081367 | 1.1631724 | 128.92988 | up | 6.79237785  | 8.91E-37 | 2.54E-36  |
| TCONS_00026235 | 0         | 128.89277 | up | Inf         | 1.75E-37 | 5.10E-37  |
| TCONS_00043138 | 0         | 128.87077 | up | Inf         | 1.75E-37 | 5.10E-37  |
| TCONS_00043756 | 0         | 128.81306 | up | Inf         | 1.75E-37 | 5.10E-37  |
| TCONS_00034744 | 9.5006774 | 128.57452 | up | 3.758430519 | 5.63E-31 | 1.29E-30  |
| TCONS_00012652 | 0         | 128.41052 | up | Inf         | 3.31E-37 | 9.56E-37  |
| TCONS_00044112 | 12.438926 | 128.25783 | up | 3.366113096 | 1.53E-29 | 3.27E-29  |
| TCONS_00012739 | 0         | 128.25783 | up | Inf         | 3.31E-37 | 9.56E-37  |
| TCONS_00081590 | 0         | 128.19468 | up | Inf         | 3.31E-37 | 9.56E-37  |
| TCONS_00012977 | 0         | 128.12788 | up | Inf         | 3.31E-37 | 9.56E-37  |
| TCONS_00032652 | 0         | 128.11532 | up | Inf         | 3.31E-37 | 9.56E-37  |
| TCONS_00055501 | 0         | 128.06991 | up | Inf         | 3.31E-37 | 9.56E-37  |
| TCONS_00096937 | 0         | 128.05711 | up | Inf         | 3.31E-37 | 9.56E-37  |
| TCONS_00089248 | 0         | 127.91852 | up | Inf         | 3.31E-37 | 9.56E-37  |
| TCONS_00018798 | 0         | 127.8744  | up | Inf         | 3.31E-37 | 9.56E-37  |
| TCONS_00043403 | 1.0894038 | 127.77365 | up | 6.873907736 | 1.69E-36 | 4.76E-36  |
| TCONS_00081814 | 0         | 127.62911 | up | Inf         | 3.31E-37 | 9.56E-37  |
| TCONS_00096764 | 0         | 127.62911 | up | Inf         | 3.31E-37 | 9.56E-37  |
| TCONS_00096776 | 0         | 127.62911 | up | Inf         | 3.31E-37 | 9.56E-37  |
| TCONS_00043766 | 0         | 127.45871 | up | Inf         | 6.27E-37 | 1.79E-36  |
| TCONS_00032850 | 0         | 127.37935 | up | Inf         | 6.27E-37 | 1.79E-36  |
| TCONS_00012523 | 0         | 127.00653 | up | Inf         | 6.27E-37 | 1.79E-36  |
| TCONS_00043898 | 0         | 126.91129 | up | Inf         | 6.27E-37 | 1.79E-36  |
| TCONS_00072638 | 0         | 126.91129 | up | Inf         | 6.27E-37 | 1.79E-36  |

|                |           |           |    |             |          |           |
|----------------|-----------|-----------|----|-------------|----------|-----------|
| TCONS_00032771 | 0         | 126.86588 | up | Inf         | 6.27E-37 | 1.79E-36  |
| TCONS_00011840 | 0         | 126.84685 | up | Inf         | 6.27E-37 | 1.79E-36  |
| TCONS_00088987 | 7.021486  | 126.69751 | up | 4.173468018 | 2.98E-32 | 7.17E-32  |
| TCONS_00010337 | 34.273525 | 126.63303 | up | 1.885487255 | 5.74E-19 | 8.14E-19  |
| TCONS_00043981 | 0         | 126.51282 | up | Inf         | 6.27E-37 | 1.79E-36  |
| TCONS_00102605 | 0         | 126.39    | up | Inf         | 1.19E-36 | 3.35E-36  |
| TCONS_00064766 | 0         | 126.37342 | up | Inf         | 1.19E-36 | 3.35E-36  |
| TCONS_00013114 | 0         | 126.17695 | up | Inf         | 1.19E-36 | 3.35E-36  |
| TCONS_00102400 | 0         | 126.17695 | up | Inf         | 1.19E-36 | 3.35E-36  |
| TCONS_00102626 | 0         | 125.99854 | up | Inf         | 1.19E-36 | 3.35E-36  |
| TCONS_00012089 | 0         | 125.95055 | up | Inf         | 1.19E-36 | 3.35E-36  |
| TCONS_00081743 | 0         | 125.9198  | up | Inf         | 1.19E-36 | 3.35E-36  |
| TCONS_00089017 | 0         | 125.9198  | up | Inf         | 1.19E-36 | 3.35E-36  |
| TCONS_00025806 | 26.438196 | 125.81741 | up | 2.250635878 | 5.36E-22 | 8.50E-22  |
| TCONS_00013149 | 0         | 125.77942 | up | Inf         | 1.19E-36 | 3.35E-36  |
| TCONS_00054724 | 0         | 125.55197 | up | Inf         | 1.19E-36 | 3.35E-36  |
| TCONS_00013157 | 0         | 125.48843 | up | Inf         | 2.25E-36 | 6.29E-36  |
| TCONS_00089430 | 0         | 125.41589 | up | Inf         | 2.25E-36 | 6.29E-36  |
| TCONS_00018626 | 0         | 125.37563 | up | Inf         | 2.25E-36 | 6.29E-36  |
| TCONS_00072456 | 0         | 125.12002 | up | Inf         | 2.25E-36 | 6.29E-36  |
| TCONS_00025777 | 0         | 125.02444 | up | Inf         | 2.25E-36 | 6.29E-36  |
| TCONS_00064833 | 0         | 125.02444 | up | Inf         | 2.25E-36 | 6.29E-36  |
| TCONS_00054961 | 0         | 124.94367 | up | Inf         | 2.25E-36 | 6.29E-36  |
| TCONS_00011902 | 0         | 124.84356 | up | Inf         | 2.25E-36 | 6.29E-36  |
| TCONS_00018723 | 0         | 124.74632 | up | Inf         | 2.25E-36 | 6.29E-36  |
| TCONS_00043072 | 2.6139771 | 124.65639 | up | 5.575566461 | 2.71E-34 | 7.04E-34  |
| TCONS_00088957 | 0         | 124.6056  | up | Inf         | 2.25E-36 | 6.29E-36  |
| TCONS_00081758 | 0         | 124.57579 | up | Inf         | 2.25E-36 | 6.29E-36  |
| TCONS_00012549 | 0         | 124.52398 | up | Inf         | 2.25E-36 | 6.29E-36  |
| TCONS_00072944 | 0         | 124.44347 | up | Inf         | 4.26E-36 | 1.17E-35  |
| TCONS_00055356 | 0         | 124.35941 | up | Inf         | 4.26E-36 | 1.17E-35  |
| TCONS_00043859 | 0         | 124.32792 | up | Inf         | 4.26E-36 | 1.17E-35  |
| TCONS_00012487 | 0         | 123.98257 | up | Inf         | 4.26E-36 | 1.17E-35  |
| TCONS_00043375 | 0         | 123.98257 | up | Inf         | 4.26E-36 | 1.17E-35  |
| TCONS_00055281 | 0         | 123.98257 | up | Inf         | 4.26E-36 | 1.17E-35  |
| TCONS_00096795 | 0         | 123.98257 | up | Inf         | 4.26E-36 | 1.17E-35  |
| TCONS_00073124 | 1.4983545 | 123.59633 | up | 6.366113096 | 2.17E-35 | 5.82E-35  |
| TCONS_00072729 | 0         | 123.59633 | up | Inf         | 4.26E-36 | 1.17E-35  |
| TCONS_00055555 | 0         | 123.46812 | up | Inf         | 8.06E-36 | 2.20E-35  |
| TCONS_00081088 | 8.3285159 | 123.44585 | up | 3.889675052 | 1.55E-30 | 3.47E-30  |
| TCONS_00012849 | 6.2463869 | 123.44585 | up | 4.304712551 | 8.85E-32 | 2.08E-31  |
| TCONS_00012351 | 9.1179487 | 123.39497 | up | 3.758430519 | 6.24E-30 | 1.36E-29  |
| TCONS_00026042 | 0         | 123.24677 | up | Inf         | 8.06E-36 | 2.20E-35  |
| TCONS_00043786 | 0         | 123.22811 | up | Inf         | 8.06E-36 | 2.20E-35  |
| TCONS_00043883 | 0         | 123.21249 | up | Inf         | 8.06E-36 | 2.20E-35  |
| TCONS_00081281 | 110.11449 | 123.17923 | up | 0.161754597 | 0.007351 | 0.0077209 |
| TCONS_00033147 | 1.8733079 | 123.13751 | up | 6.038538438 | 2.03E-34 | 5.28E-34  |
| TCONS_00102469 | 0         | 123.13337 | up | Inf         | 8.06E-36 | 2.20E-35  |
| TCONS_00043363 | 0         | 122.98539 | up | Inf         | 8.06E-36 | 2.20E-35  |

|                |           |           |    |             |          |          |
|----------------|-----------|-----------|----|-------------|----------|----------|
| TCONS_00072603 | 0         | 122.89817 | up | Inf         | 8.06E-36 | 2.20E-35 |
| TCONS_00102413 | 0         | 122.81292 | up | Inf         | 8.06E-36 | 2.20E-35 |
| TCONS_00011861 | 0         | 122.75502 | up | Inf         | 8.06E-36 | 2.20E-35 |
| TCONS_00018690 | 0         | 122.75502 | up | Inf         | 8.06E-36 | 2.20E-35 |
| TCONS_00025994 | 0         | 122.75502 | up | Inf         | 8.06E-36 | 2.20E-35 |
| TCONS_00054878 | 0         | 122.62012 | up | Inf         | 8.06E-36 | 2.20E-35 |
| TCONS_00012412 | 0         | 122.56832 | up | Inf         | 8.06E-36 | 2.20E-35 |
| TCONS_00018663 | 0         | 122.45192 | up | Inf         | 1.53E-35 | 4.12E-35 |
| TCONS_00012825 | 0         | 122.38623 | up | Inf         | 1.53E-35 | 4.12E-35 |
| TCONS_00018898 | 0         | 122.38623 | up | Inf         | 1.53E-35 | 4.12E-35 |
| TCONS_00081391 | 0         | 122.38623 | up | Inf         | 1.53E-35 | 4.12E-35 |
| TCONS_00011892 | 0         | 122.15031 | up | Inf         | 1.53E-35 | 4.12E-35 |
| TCONS_00012736 | 0         | 122.15031 | up | Inf         | 1.53E-35 | 4.12E-35 |
| TCONS_00026279 | 0         | 122.15031 | up | Inf         | 1.53E-35 | 4.12E-35 |
| TCONS_00064732 | 0         | 122.15031 | up | Inf         | 1.53E-35 | 4.12E-35 |
| TCONS_00081086 | 65.587063 | 122.10404 | up | 0.896627812 | 8.89E-09 | 1.01E-08 |
| TCONS_00011890 | 0         | 122.03009 | up | Inf         | 1.53E-35 | 4.12E-35 |
| TCONS_00018741 | 0         | 121.80744 | up | Inf         | 1.53E-35 | 4.12E-35 |
| TCONS_00018902 | 0         | 121.55154 | up | Inf         | 1.53E-35 | 4.12E-35 |
| TCONS_00044141 | 0         | 121.55154 | up | Inf         | 1.53E-35 | 4.12E-35 |
| TCONS_00064661 | 0         | 121.55154 | up | Inf         | 1.53E-35 | 4.12E-35 |
| TCONS_00089082 | 0         | 121.55154 | up | Inf         | 1.53E-35 | 4.12E-35 |
| TCONS_00072516 | 0         | 121.28729 | up | Inf         | 2.89E-35 | 7.71E-35 |
| TCONS_00096544 | 84.381016 | 121.18597 | up | 0.522232298 | 1.62E-05 | 1.76E-05 |
| TCONS_00089196 | 0         | 120.9586  | up | Inf         | 2.89E-35 | 7.71E-35 |
| TCONS_00102284 | 35.848829 | 120.64556 | up | 1.750776946 | 8.20E-17 | 1.08E-16 |
| TCONS_00064413 | 0         | 120.63169 | up | Inf         | 2.89E-35 | 7.71E-35 |
| TCONS_00102604 | 0         | 120.53861 | up | Inf         | 2.89E-35 | 7.71E-35 |
| TCONS_00072784 | 2.5247863 | 120.40302 | up | 5.575566461 | 6.57E-33 | 1.61E-32 |
| TCONS_00096940 | 0         | 120.37143 | up | Inf         | 5.48E-35 | 1.45E-34 |
| TCONS_00102816 | 0         | 120.37143 | up | Inf         | 5.48E-35 | 1.45E-34 |
| TCONS_00043155 | 0         | 120.32064 | up | Inf         | 5.48E-35 | 1.45E-34 |
| TCONS_00072774 | 0         | 120.32064 | up | Inf         | 5.48E-35 | 1.45E-34 |
| TCONS_00043718 | 0         | 119.81509 | up | Inf         | 5.48E-35 | 1.45E-34 |
| TCONS_00102756 | 0         | 119.78992 | up | Inf         | 5.48E-35 | 1.45E-34 |
| TCONS_00032815 | 0         | 119.67429 | up | Inf         | 5.48E-35 | 1.45E-34 |
| TCONS_00025762 | 0         | 119.66146 | up | Inf         | 5.48E-35 | 1.45E-34 |
| TCONS_00032626 | 0         | 119.6323  | up | Inf         | 5.48E-35 | 1.45E-34 |
| TCONS_00013031 | 0         | 119.55462 | up | Inf         | 5.48E-35 | 1.45E-34 |
| TCONS_00043762 | 0         | 119.21401 | up | Inf         | 1.04E-34 | 2.72E-34 |
| TCONS_00064314 | 0         | 119.12916 | up | Inf         | 1.04E-34 | 2.72E-34 |
| TCONS_00064265 | 0         | 119.09656 | up | Inf         | 1.04E-34 | 2.72E-34 |
| TCONS_00064502 | 0         | 118.95982 | up | Inf         | 1.04E-34 | 2.72E-34 |
| TCONS_00043563 | 0         | 118.81663 | up | Inf         | 1.04E-34 | 2.72E-34 |
| TCONS_00054593 | 0         | 118.70671 | up | Inf         | 1.04E-34 | 2.72E-34 |
| TCONS_00025847 | 0         | 118.32361 | up | Inf         | 1.96E-34 | 5.13E-34 |
| TCONS_00055067 | 0         | 118.27284 | up | Inf         | 1.96E-34 | 5.13E-34 |
| TCONS_00025741 | 0         | 118.07864 | up | Inf         | 1.96E-34 | 5.13E-34 |
| TCONS_00081219 | 0         | 117.53699 | up | Inf         | 1.96E-34 | 5.13E-34 |



|                |           |              |             |          |          |
|----------------|-----------|--------------|-------------|----------|----------|
| TCONS_00055122 | 0         | 117.37995 up | Inf         | 3.72E-34 | 9.61E-34 |
| TCONS_00043917 | 0         | 117.32366 up | Inf         | 3.72E-34 | 9.61E-34 |
| TCONS_00018674 | 0         | 117.11708 up | Inf         | 3.72E-34 | 9.61E-34 |
| TCONS_00019029 | 0         | 116.96469 up | Inf         | 3.72E-34 | 9.61E-34 |
| TCONS_00055003 | 0         | 116.96469 up | Inf         | 3.72E-34 | 9.61E-34 |
| TCONS_00032748 | 27.596742 | 116.86881 up | 2.08232013  | 6.59E-19 | 9.33E-19 |
| TCONS_00032788 | 0         | 116.86881 up | Inf         | 3.72E-34 | 9.61E-34 |
| TCONS_00096773 | 1.5101155 | 116.78107 up | 6.273003691 | 9.34E-33 | 2.28E-32 |
| TCONS_00054975 | 0         | 116.75488 up | Inf         | 3.72E-34 | 9.61E-34 |
| TCONS_00012879 | 0         | 116.68948 up | Inf         | 3.72E-34 | 9.61E-34 |
| TCONS_00089603 | 0         | 116.61727 up | Inf         | 3.72E-34 | 9.61E-34 |
| TCONS_00018794 | 0         | 116.49369 up | Inf         | 7.05E-34 | 1.80E-33 |
| TCONS_00064543 | 2.9149806 | 116.46847 up | 5.320309406 | 8.42E-32 | 1.98E-31 |
| TCONS_00081559 | 0         | 116.41556 up | Inf         | 7.05E-34 | 1.80E-33 |
| TCONS_00018679 | 0         | 116.37353 up | Inf         | 7.05E-34 | 1.80E-33 |
| TCONS_00012785 | 0         | 116.15475 up | Inf         | 7.05E-34 | 1.80E-33 |
| TCONS_00018882 | 70.778458 | 116.10408 up | 0.714036399 | 7.53E-07 | 8.37E-07 |
| TCONS_00055326 | 0         | 116.10408 up | Inf         | 7.05E-34 | 1.80E-33 |
| TCONS_00011773 | 0         | 116.05674 up | Inf         | 7.05E-34 | 1.80E-33 |
| TCONS_00032962 | 0         | 116.0428 up  | Inf         | 7.05E-34 | 1.80E-33 |
| TCONS_00033058 | 0         | 116.0428 up  | Inf         | 7.05E-34 | 1.80E-33 |
| TCONS_00072367 | 0         | 116.0428 up  | Inf         | 7.05E-34 | 1.80E-33 |
| TCONS_00072724 | 0         | 116.0428 up  | Inf         | 7.05E-34 | 1.80E-33 |
| TCONS_00089365 | 0         | 116.0428 up  | Inf         | 7.05E-34 | 1.80E-33 |
| TCONS_00096444 | 0         | 116.0428 up  | Inf         | 7.05E-34 | 1.80E-33 |
| TCONS_00018587 | 0         | 115.91866 up | Inf         | 7.05E-34 | 1.80E-33 |
| TCONS_00032732 | 0         | 115.91866 up | Inf         | 7.05E-34 | 1.80E-33 |
| TCONS_00081102 | 0         | 115.51171 up | Inf         | 7.05E-34 | 1.80E-33 |
| TCONS_00032855 | 0         | 115.47396 up | Inf         | 1.34E-33 | 3.37E-33 |
| TCONS_00043119 | 0         | 115.47396 up | Inf         | 1.34E-33 | 3.37E-33 |
| TCONS_00055546 | 0         | 115.47396 up | Inf         | 1.34E-33 | 3.37E-33 |
| TCONS_00064218 | 0         | 115.47396 up | Inf         | 1.34E-33 | 3.37E-33 |
| TCONS_00072593 | 2.4856423 | 115.33262 up | 5.536038097 | 3.35E-32 | 7.99E-32 |
| TCONS_00026084 | 0         | 115.33262 up | Inf         | 1.34E-33 | 3.37E-33 |
| TCONS_00081629 | 0         | 115.33262 up | Inf         | 1.34E-33 | 3.37E-33 |
| TCONS_00054895 | 0         | 115.12667 up | Inf         | 1.34E-33 | 3.37E-33 |
| TCONS_00043841 | 0         | 114.86123 up | Inf         | 1.34E-33 | 3.37E-33 |
| TCONS_00055071 | 0         | 114.79867 up | Inf         | 1.34E-33 | 3.37E-33 |
| TCONS_00055527 | 0         | 114.73014 up | Inf         | 1.34E-33 | 3.37E-33 |
| TCONS_00096552 | 0         | 114.69753 up | Inf         | 1.34E-33 | 3.37E-33 |
| TCONS_00073093 | 0         | 114.60574 up | Inf         | 1.34E-33 | 3.37E-33 |
| TCONS_00043406 | 0         | 114.52205 up | Inf         | 1.34E-33 | 3.37E-33 |
| TCONS_00012705 | 0         | 114.37506 up | Inf         | 2.53E-33 | 6.29E-33 |
| TCONS_00012018 | 0         | 114.35285 up | Inf         | 2.53E-33 | 6.29E-33 |
| TCONS_00018799 | 0         | 114.35285 up | Inf         | 2.53E-33 | 6.29E-33 |
| TCONS_00025998 | 0         | 114.35285 up | Inf         | 2.53E-33 | 6.29E-33 |
| TCONS_00043082 | 0         | 114.35285 up | Inf         | 2.53E-33 | 6.29E-33 |
| TCONS_00044038 | 0         | 114.35285 up | Inf         | 2.53E-33 | 6.29E-33 |
| TCONS_00055386 | 0         | 114.35285 up | Inf         | 2.53E-33 | 6.29E-33 |

|                |           |           |    |             |          |           |
|----------------|-----------|-----------|----|-------------|----------|-----------|
| TCONS_00089133 | 0         | 114.31017 | up | Inf         | 2.53E-33 | 6.29E-33  |
| TCONS_00018716 | 0         | 114.19447 | up | Inf         | 2.53E-33 | 6.29E-33  |
| TCONS_00096442 | 0         | 114.19447 | up | Inf         | 2.53E-33 | 6.29E-33  |
| TCONS_00064790 | 0         | 114.12621 | up | Inf         | 2.53E-33 | 6.29E-33  |
| TCONS_00081425 | 0         | 114.09439 | up | Inf         | 2.53E-33 | 6.29E-33  |
| TCONS_00012043 | 3.5365573 | 113.95457 | up | 5.009969286 | 1.39E-30 | 3.14E-30  |
| TCONS_00011891 | 0         | 113.80042 | up | Inf         | 2.53E-33 | 6.29E-33  |
| TCONS_00089136 | 0         | 113.65069 | up | Inf         | 2.53E-33 | 6.29E-33  |
| TCONS_00096831 | 0         | 113.62284 | up | Inf         | 2.53E-33 | 6.29E-33  |
| TCONS_00081411 | 0         | 113.54839 | up | Inf         | 2.53E-33 | 6.29E-33  |
| TCONS_00019116 | 0         | 113.53715 | up | Inf         | 2.53E-33 | 6.29E-33  |
| TCONS_00088958 | 0         | 113.53715 | up | Inf         | 2.53E-33 | 6.29E-33  |
| TCONS_00032830 | 0         | 113.51766 | up | Inf         | 2.53E-33 | 6.29E-33  |
| TCONS_00054445 | 0         | 113.50517 | up | Inf         | 2.53E-33 | 6.29E-33  |
| TCONS_00012418 | 0         | 113.4481  | up | Inf         | 4.79E-33 | 1.18E-32  |
| TCONS_00081046 | 0         | 113.37639 | up | Inf         | 4.79E-33 | 1.18E-32  |
| TCONS_00043741 | 0         | 113.25331 | up | Inf         | 4.79E-33 | 1.18E-32  |
| TCONS_00054830 | 0         | 113.17911 | up | Inf         | 4.79E-33 | 1.18E-32  |
| TCONS_00026128 | 0         | 113.04293 | up | Inf         | 4.79E-33 | 1.18E-32  |
| TCONS_00096529 | 18.303366 | 112.71143 | up | 2.622452849 | 2.33E-22 | 3.75E-22  |
| TCONS_00025846 | 0         | 112.71143 | up | Inf         | 4.79E-33 | 1.18E-32  |
| TCONS_00096550 | 0         | 112.71143 | up | Inf         | 4.79E-33 | 1.18E-32  |
| TCONS_00064210 | 97.191192 | 112.41943 | up | 0.209993894 | 0.005583 | 0.0058882 |
| TCONS_00044077 | 0         | 112.30305 | up | Inf         | 9.08E-33 | 2.22E-32  |
| TCONS_00064410 | 0         | 112.2861  | up | Inf         | 9.08E-33 | 2.22E-32  |
| TCONS_00064976 | 0         | 112.26768 | up | Inf         | 9.08E-33 | 2.22E-32  |
| TCONS_00025887 | 0         | 112.1119  | up | Inf         | 9.08E-33 | 2.22E-32  |
| TCONS_00072768 | 0         | 112.06459 | up | Inf         | 9.08E-33 | 2.22E-32  |
| TCONS_00012382 | 0         | 111.67547 | up | Inf         | 9.08E-33 | 2.22E-32  |
| TCONS_00064864 | 0         | 111.67021 | up | Inf         | 9.08E-33 | 2.22E-32  |
| TCONS_00055489 | 0         | 111.58431 | up | Inf         | 9.08E-33 | 2.22E-32  |
| TCONS_00072956 | 0         | 111.26641 | up | Inf         | 1.72E-32 | 4.14E-32  |
| TCONS_00096763 | 0         | 111.26641 | up | Inf         | 1.72E-32 | 4.14E-32  |
| TCONS_00054423 | 0         | 111.09549 | up | Inf         | 1.72E-32 | 4.14E-32  |
| TCONS_00096866 | 3.9103398 | 110.87872 | up | 4.825544714 | 9.38E-30 | 2.03E-29  |
| TCONS_00018778 | 0         | 110.6306  | up | Inf         | 1.72E-32 | 4.14E-32  |
| TCONS_00064569 | 0         | 110.57905 | up | Inf         | 1.72E-32 | 4.14E-32  |
| TCONS_00012500 | 0         | 110.47952 | up | Inf         | 3.26E-32 | 7.78E-32  |
| TCONS_00032852 | 0         | 110.47952 | up | Inf         | 3.26E-32 | 7.78E-32  |
| TCONS_00043724 | 0         | 110.47952 | up | Inf         | 3.26E-32 | 7.78E-32  |
| TCONS_00054433 | 0         | 110.47952 | up | Inf         | 3.26E-32 | 7.78E-32  |
| TCONS_00055177 | 0         | 110.47952 | up | Inf         | 3.26E-32 | 7.78E-32  |
| TCONS_00081598 | 0         | 110.47952 | up | Inf         | 3.26E-32 | 7.78E-32  |
| TCONS_00018743 | 0         | 110.39544 | up | Inf         | 3.26E-32 | 7.78E-32  |
| TCONS_00012994 | 0         | 109.93528 | up | Inf         | 3.26E-32 | 7.78E-32  |
| TCONS_00096900 | 0         | 109.93528 | up | Inf         | 3.26E-32 | 7.78E-32  |
| TCONS_00064356 | 79.147257 | 109.85797 | up | 0.4730283   | 9.13E-05 | 9.86E-05  |
| TCONS_00064322 | 0         | 109.71909 | up | Inf         | 3.26E-32 | 7.78E-32  |
| TCONS_00043154 | 0         | 109.64445 | up | Inf         | 3.26E-32 | 7.78E-32  |

|                |            |                 |              |           |           |
|----------------|------------|-----------------|--------------|-----------|-----------|
| TCONS_00043666 | 3. 399094  | 109. 52524 up   | 5. 009969286 | 3. 87E-30 | 8. 54E-30 |
| TCONS_00012230 |            | 0 109. 39638 up | Inf          | 6. 17E-32 | 1. 46E-31 |
| TCONS_00043928 |            | 0 109. 27277 up | Inf          | 6. 17E-32 | 1. 46E-31 |
| TCONS_00033063 |            | 0 109. 23574 up | Inf          | 6. 17E-32 | 1. 46E-31 |
| TCONS_00043108 |            | 0 109. 04004 up | Inf          | 6. 17E-32 | 1. 46E-31 |
| TCONS_00043845 |            | 0 108. 97307 up | Inf          | 6. 17E-32 | 1. 46E-31 |
| TCONS_00012954 |            | 0 108. 95438 up | Inf          | 6. 17E-32 | 1. 46E-31 |
| TCONS_00033150 |            | 0 108. 86274 up | Inf          | 6. 17E-32 | 1. 46E-31 |
| TCONS_00089036 |            | 0 108. 86274 up | Inf          | 6. 17E-32 | 1. 46E-31 |
| TCONS_00096705 |            | 0 108. 86274 up | Inf          | 6. 17E-32 | 1. 46E-31 |
| TCONS_00072685 |            | 0 108. 83966 up | Inf          | 6. 17E-32 | 1. 46E-31 |
| TCONS_00096765 |            | 0 108. 71123 up | Inf          | 6. 17E-32 | 1. 46E-31 |
| TCONS_00018630 |            | 0 108. 66998 up | Inf          | 6. 17E-32 | 1. 46E-31 |
| TCONS_00055079 |            | 0 108. 59787 up | Inf          | 6. 17E-32 | 1. 46E-31 |
| TCONS_00064823 |            | 0 108. 51866 up | Inf          | 6. 17E-32 | 1. 46E-31 |
| TCONS_00019163 |            | 0 108. 33428 up | Inf          | 1. 17E-31 | 2. 73E-31 |
| TCONS_00064565 |            | 0 108. 33428 up | Inf          | 1. 17E-31 | 2. 73E-31 |
| TCONS_00096390 |            | 0 108. 33428 up | Inf          | 1. 17E-31 | 2. 73E-31 |
| TCONS_00081083 | 1. 5268946 | 108. 23875 up   | 6. 147472809 | 2. 92E-30 | 6. 46E-30 |
| TCONS_00033071 |            | 0 108. 20297 up | Inf          | 1. 17E-31 | 2. 73E-31 |
| TCONS_00054875 |            | 0 107. 81093 up | Inf          | 1. 17E-31 | 2. 73E-31 |
| TCONS_00055273 |            | 0 107. 81093 up | Inf          | 1. 17E-31 | 2. 73E-31 |
| TCONS_00064995 |            | 0 107. 81093 up | Inf          | 1. 17E-31 | 2. 73E-31 |
| TCONS_00102452 |            | 0 107. 72256 up | Inf          | 1. 17E-31 | 2. 73E-31 |
| TCONS_00081368 |            | 0 107. 56479 up | Inf          | 1. 17E-31 | 2. 73E-31 |
| TCONS_00102565 |            | 0 107. 49934 up | Inf          | 2. 22E-31 | 5. 13E-31 |
| TCONS_00072453 |            | 0 107. 42172 up | Inf          | 2. 22E-31 | 5. 13E-31 |
| TCONS_00019047 |            | 0 107. 25136 up | Inf          | 2. 22E-31 | 5. 13E-31 |
| TCONS_00054746 |            | 0 107. 14543 up | Inf          | 2. 22E-31 | 5. 13E-31 |
| TCONS_00081155 |            | 0 107. 07585 up | Inf          | 2. 22E-31 | 5. 13E-31 |
| TCONS_00064224 |            | 0 106. 96535 up | Inf          | 2. 22E-31 | 5. 13E-31 |
| TCONS_00019030 |            | 0 106. 88152 up | Inf          | 2. 22E-31 | 5. 13E-31 |
| TCONS_00089171 |            | 0 106. 77925 up | Inf          | 2. 22E-31 | 5. 13E-31 |
| TCONS_00055165 |            | 0 106. 70631 up | Inf          | 2. 22E-31 | 5. 13E-31 |
| TCONS_00081275 |            | 0 106. 70631 up | Inf          | 2. 22E-31 | 5. 13E-31 |
| TCONS_00064737 |            | 0 106. 60921 up | Inf          | 2. 22E-31 | 5. 13E-31 |
| TCONS_00102676 |            | 0 106. 44968 up | Inf          | 4. 20E-31 | 9. 64E-31 |
| TCONS_00043191 |            | 0 106. 36574 up | Inf          | 4. 20E-31 | 9. 64E-31 |
| TCONS_00081326 |            | 0 106. 27077 up | Inf          | 4. 20E-31 | 9. 64E-31 |
| TCONS_00089611 |            | 0 106. 27077 up | Inf          | 4. 20E-31 | 9. 64E-31 |
| TCONS_00043818 |            | 0 106. 18154 up | Inf          | 4. 20E-31 | 9. 64E-31 |
| TCONS_00013151 |            | 0 106. 16244 up | Inf          | 4. 20E-31 | 9. 64E-31 |
| TCONS_00089554 | 3. 4293889 | 106. 08134 up   | 4. 951075596 | 4. 96E-29 | 1. 05E-28 |
| TCONS_00054533 | 5. 4759597 | 105. 86747 up   | 4. 273003691 | 1. 00E-27 | 1. 98E-27 |
| TCONS_00096354 |            | 0 105. 78717 up | Inf          | 4. 20E-31 | 9. 64E-31 |
| TCONS_00064887 |            | 0 105. 76712 up | Inf          | 4. 20E-31 | 9. 64E-31 |
| TCONS_00043794 |            | 0 105. 69006 up | Inf          | 4. 20E-31 | 9. 64E-31 |
| TCONS_00043570 |            | 0 105. 63537 up | Inf          | 4. 20E-31 | 9. 64E-31 |
| TCONS_00012949 |            | 0 105. 56774 up | Inf          | 4. 20E-31 | 9. 64E-31 |

|                |           |           |    |             |          |          |
|----------------|-----------|-----------|----|-------------|----------|----------|
| TCONS_00089359 | 0         | 105.30026 | up | Inf         | 7.96E-31 | 1.81E-30 |
| TCONS_00025974 | 0         | 105.26822 | up | Inf         | 7.96E-31 | 1.81E-30 |
| TCONS_00054446 | 0         | 105.26822 | up | Inf         | 7.96E-31 | 1.81E-30 |
| TCONS_00043245 | 0         | 105.22506 | up | Inf         | 7.96E-31 | 1.81E-30 |
| TCONS_00044199 | 0         | 105.06997 | up | Inf         | 7.96E-31 | 1.81E-30 |
| TCONS_00072667 | 0         | 104.98524 | up | Inf         | 7.96E-31 | 1.81E-30 |
| TCONS_00081299 | 3.1282718 | 104.83079 | up | 5.066552814 | 9.39E-29 | 1.96E-28 |
| TCONS_00089095 | 0         | 104.66061 | up | Inf         | 7.96E-31 | 1.81E-30 |
| TCONS_00096627 | 0         | 104.62664 | up | Inf         | 7.96E-31 | 1.81E-30 |
| TCONS_00096954 | 0         | 104.62664 | up | Inf         | 7.96E-31 | 1.81E-30 |
| TCONS_00011894 | 0         | 104.59435 | up | Inf         | 7.96E-31 | 1.81E-30 |
| TCONS_00043821 | 0         | 104.56361 | up | Inf         | 7.96E-31 | 1.81E-30 |
| TCONS_00072959 | 0         | 104.56361 | up | Inf         | 7.96E-31 | 1.81E-30 |
| TCONS_00102412 | 0         | 104.56361 | up | Inf         | 7.96E-31 | 1.81E-30 |
| TCONS_00054792 | 0         | 104.40637 | up | Inf         | 1.51E-30 | 3.38E-30 |
| TCONS_00012419 | 0         | 104.34177 | up | Inf         | 1.51E-30 | 3.38E-30 |
| TCONS_00018641 | 0         | 104.34177 | up | Inf         | 1.51E-30 | 3.38E-30 |
| TCONS_00043006 | 0         | 104.34177 | up | Inf         | 1.51E-30 | 3.38E-30 |
| TCONS_00081449 | 0         | 104.34177 | up | Inf         | 1.51E-30 | 3.38E-30 |
| TCONS_00089074 | 0         | 104.34177 | up | Inf         | 1.51E-30 | 3.38E-30 |
| TCONS_00089640 | 0         | 104.34177 | up | Inf         | 1.51E-30 | 3.38E-30 |
| TCONS_00032801 | 0         | 104.2844  | up | Inf         | 1.51E-30 | 3.38E-30 |
| TCONS_00043165 | 0         | 104.2844  | up | Inf         | 1.51E-30 | 3.38E-30 |
| TCONS_00089122 | 0         | 104.2844  | up | Inf         | 1.51E-30 | 3.38E-30 |
| TCONS_00054411 | 0         | 104.23313 | up | Inf         | 1.51E-30 | 3.38E-30 |
| TCONS_00054491 | 0         | 104.07296 | up | Inf         | 1.51E-30 | 3.38E-30 |
| TCONS_00081172 | 0         | 104.07296 | up | Inf         | 1.51E-30 | 3.38E-30 |
| TCONS_00102363 | 0         | 104.07296 | up | Inf         | 1.51E-30 | 3.38E-30 |
| TCONS_00064679 | 0         | 104.01222 | up | Inf         | 1.51E-30 | 3.38E-30 |
| TCONS_00018832 | 0         | 103.93748 | up | Inf         | 1.51E-30 | 3.38E-30 |
| TCONS_00012494 | 0         | 103.82777 | up | Inf         | 1.51E-30 | 3.38E-30 |
| TCONS_00043541 | 0         | 103.82777 | up | Inf         | 1.51E-30 | 3.38E-30 |
| TCONS_00089041 | 0         | 103.82777 | up | Inf         | 1.51E-30 | 3.38E-30 |
| TCONS_00102793 | 0         | 103.82777 | up | Inf         | 1.51E-30 | 3.38E-30 |
| TCONS_00055121 | 0         | 103.73044 | up | Inf         | 1.51E-30 | 3.38E-30 |
| TCONS_00081617 | 0         | 103.69451 | up | Inf         | 1.51E-30 | 3.38E-30 |
| TCONS_00064249 | 0         | 103.51049 | up | Inf         | 1.51E-30 | 3.38E-30 |
| TCONS_00012301 | 43.724709 | 103.31881 | up | 1.240582214 | 2.17E-10 | 2.53E-10 |
| TCONS_00043109 | 9.4308195 | 103.31881 | up | 3.453575937 | 1.80E-24 | 3.15E-24 |
| TCONS_00012639 | 0         | 103.31881 | up | Inf         | 2.86E-30 | 6.32E-30 |
| TCONS_00032777 | 0         | 103.31881 | up | Inf         | 2.86E-30 | 6.32E-30 |
| TCONS_00081121 | 0         | 103.31881 | up | Inf         | 2.86E-30 | 6.32E-30 |
| TCONS_00089378 | 0         | 103.31881 | up | Inf         | 2.86E-30 | 6.32E-30 |
| TCONS_00096847 | 0         | 102.98871 | up | Inf         | 2.86E-30 | 6.32E-30 |
| TCONS_00081656 | 0         | 102.8901  | up | Inf         | 2.86E-30 | 6.32E-30 |
| TCONS_00018941 | 0         | 102.81481 | up | Inf         | 2.86E-30 | 6.32E-30 |
| TCONS_00064769 | 0         | 102.81481 | up | Inf         | 2.86E-30 | 6.32E-30 |
| TCONS_00064793 | 0         | 102.81481 | up | Inf         | 2.86E-30 | 6.32E-30 |
| TCONS_00096769 | 0         | 102.81481 | up | Inf         | 2.86E-30 | 6.32E-30 |

|                |            |               |              |           |            |
|----------------|------------|---------------|--------------|-----------|------------|
| TCONS_00081749 | 77. 254537 | 102. 78348 up | 0. 411916785 | 0. 00038  | 0. 0004058 |
| TCONS_00054495 | 0          | 102. 78348 up | Inf          | 2. 86E-30 | 6. 32E-30  |
| TCONS_00054707 | 0          | 102. 76033 up | Inf          | 2. 86E-30 | 6. 32E-30  |
| TCONS_00081661 | 0          | 102. 74798 up | Inf          | 2. 86E-30 | 6. 32E-30  |
| TCONS_00102772 | 0          | 102. 49226 up | Inf          | 5. 42E-30 | 1. 18E-29  |
| TCONS_00072429 | 0          | 102. 42038 up | Inf          | 5. 42E-30 | 1. 18E-29  |
| TCONS_00018721 | 0          | 102. 3441 up  | Inf          | 5. 42E-30 | 1. 18E-29  |
| TCONS_00011801 | 0          | 102. 31571 up | Inf          | 5. 42E-30 | 1. 18E-29  |
| TCONS_00072499 | 0          | 101. 84282 up | Inf          | 5. 42E-30 | 1. 18E-29  |
| TCONS_00012189 | 0          | 101. 82143 up | Inf          | 5. 42E-30 | 1. 18E-29  |
| TCONS_00054851 | 0          | 101. 82143 up | Inf          | 5. 42E-30 | 1. 18E-29  |
| TCONS_00064815 | 0          | 101. 82143 up | Inf          | 5. 42E-30 | 1. 18E-29  |
| TCONS_00081769 | 0          | 101. 82143 up | Inf          | 5. 42E-30 | 1. 18E-29  |
| TCONS_00096668 | 0          | 101. 82143 up | Inf          | 5. 42E-30 | 1. 18E-29  |
| TCONS_00102428 | 4. 0502888 | 101. 79621 up | 4. 651515315 | 2. 90E-27 | 5. 66E-27  |
| TCONS_00055579 | 0          | 101. 71519 up | Inf          | 5. 42E-30 | 1. 18E-29  |
| TCONS_00055395 | 0          | 101. 62506 up | Inf          | 5. 42E-30 | 1. 18E-29  |
| TCONS_00081655 | 0          | 101. 62506 up | Inf          | 5. 42E-30 | 1. 18E-29  |
| TCONS_00018737 | 0          | 101. 55569 up | Inf          | 5. 42E-30 | 1. 18E-29  |
| TCONS_00089159 | 4. 1463086 | 101. 53745 up | 4. 614040609 | 2. 90E-27 | 5. 66E-27  |
| TCONS_00011932 | 0          | 101. 52419 up | Inf          | 5. 42E-30 | 1. 18E-29  |
| TCONS_00081177 | 0          | 101. 48039 up | Inf          | 1. 03E-29 | 2. 21E-29  |
| TCONS_00081479 | 0          | 101. 39838 up | Inf          | 1. 03E-29 | 2. 21E-29  |
| TCONS_00102489 | 0          | 101. 36016 up | Inf          | 1. 03E-29 | 2. 21E-29  |
| TCONS_00064137 | 0          | 101. 33191 up | Inf          | 1. 03E-29 | 2. 21E-29  |
| TCONS_00102607 | 0          | 101. 33191 up | Inf          | 1. 03E-29 | 2. 21E-29  |
| TCONS_00096817 | 0          | 101. 30871 up | Inf          | 1. 03E-29 | 2. 21E-29  |
| TCONS_00025755 | 0          | 101. 29295 up | Inf          | 1. 03E-29 | 2. 21E-29  |
| TCONS_00088990 | 0          | 101. 12053 up | Inf          | 1. 03E-29 | 2. 21E-29  |
| TCONS_00081616 | 0          | 101. 0889 up  | Inf          | 1. 03E-29 | 2. 21E-29  |
| TCONS_00089070 | 0          | 100. 963 up   | Inf          | 1. 03E-29 | 2. 21E-29  |
| TCONS_00045741 | 3. 2608257 | 100. 86717 up | 4. 951075596 | 1. 21E-27 | 2. 38E-27  |
| TCONS_00012173 | 0          | 100. 86717 up | Inf          | 1. 03E-29 | 2. 21E-29  |
| TCONS_00089191 | 0          | 100. 86717 up | Inf          | 1. 03E-29 | 2. 21E-29  |
| TCONS_00081147 | 0          | 100. 84706 up | Inf          | 1. 03E-29 | 2. 21E-29  |
| TCONS_00096405 | 0          | 100. 77401 up | Inf          | 1. 03E-29 | 2. 21E-29  |
| TCONS_00064290 | 0          | 100. 6352 up  | Inf          | 1. 03E-29 | 2. 21E-29  |
| TCONS_00081053 | 0          | 100. 42202 up | Inf          | 1. 95E-29 | 4. 16E-29  |
| TCONS_00026010 | 61. 839231 | 100. 36684 up | 0. 698688435 | 5. 99E-06 | 6. 58E-06  |
| TCONS_00054504 | 0          | 100. 36684 up | Inf          | 1. 95E-29 | 4. 16E-29  |
| TCONS_00089580 | 59. 022648 | 100. 35143 up | 0. 765720554 | 1. 75E-06 | 1. 94E-06  |
| TCONS_00081176 | 8. 6272968 | 100. 07562 up | 3. 536038097 | 1. 18E-23 | 2. 01E-23  |
| TCONS_00044010 | 0          | 100. 07562 up | Inf          | 1. 95E-29 | 4. 16E-29  |
| TCONS_00096821 | 0          | 99. 912692 up | Inf          | 1. 95E-29 | 4. 16E-29  |
| TCONS_00012172 | 0          | 99. 891169 up | Inf          | 1. 95E-29 | 4. 16E-29  |
| TCONS_00026021 | 0          | 99. 851733 up | Inf          | 1. 95E-29 | 4. 16E-29  |
| TCONS_00043186 | 0          | 99. 83012 up  | Inf          | 1. 95E-29 | 4. 16E-29  |
| TCONS_00072482 | 0          | 99. 186054 up | Inf          | 3. 69E-29 | 7. 79E-29  |
| TCONS_00072556 | 0          | 99. 186054 up | Inf          | 3. 69E-29 | 7. 79E-29  |

|                |                        |             |          |          |
|----------------|------------------------|-------------|----------|----------|
| TCONS_00032889 | 0 99.084429 up         | Inf         | 3.69E-29 | 7.79E-29 |
| TCONS_00072887 | 0 99.065974 up         | Inf         | 3.69E-29 | 7.79E-29 |
| TCONS_00012926 | 0 99.02761 up          | Inf         | 3.69E-29 | 7.79E-29 |
| TCONS_00064813 | 0 99.02761 up          | Inf         | 3.69E-29 | 7.79E-29 |
| TCONS_00043249 | 0 98.96613 up          | Inf         | 3.69E-29 | 7.79E-29 |
| TCONS_00064256 | 0 98.953223 up         | Inf         | 3.69E-29 | 7.79E-29 |
| TCONS_00081305 | 0 98.938708 up         | Inf         | 3.69E-29 | 7.79E-29 |
| TCONS_00072428 | 0 98.790891 up         | Inf         | 3.69E-29 | 7.79E-29 |
| TCONS_00054734 | 0 98.331002 up         | Inf         | 6.99E-29 | 1.46E-28 |
| TCONS_00081575 | 0 98.331002 up         | Inf         | 6.99E-29 | 1.46E-28 |
| TCONS_00089011 | 4.9204276 98.2982 up   | 4.320309406 | 1.62E-25 | 2.93E-25 |
| TCONS_00096495 | 0 98.250337 up         | Inf         | 6.99E-29 | 1.46E-28 |
| TCONS_00012658 | 0 98.204014 up         | Inf         | 6.99E-29 | 1.46E-28 |
| TCONS_00013037 | 0 98.204014 up         | Inf         | 6.99E-29 | 1.46E-28 |
| TCONS_00032921 | 0 98.204014 up         | Inf         | 6.99E-29 | 1.46E-28 |
| TCONS_00064280 | 0 98.204014 up         | Inf         | 6.99E-29 | 1.46E-28 |
| TCONS_00073017 | 0 98.204014 up         | Inf         | 6.99E-29 | 1.46E-28 |
| TCONS_00089645 | 0 98.204014 up         | Inf         | 6.99E-29 | 1.46E-28 |
| TCONS_00012709 | 0 98.152866 up         | Inf         | 6.99E-29 | 1.46E-28 |
| TCONS_00055673 | 0 98.032728 up         | Inf         | 6.99E-29 | 1.46E-28 |
| TCONS_00064484 | 0 98.032728 up         | Inf         | 6.99E-29 | 1.46E-28 |
| TCONS_00043263 | 0 98.009935 up         | Inf         | 6.99E-29 | 1.46E-28 |
| TCONS_00064501 | 0 97.880975 up         | Inf         | 6.99E-29 | 1.46E-28 |
| TCONS_00089032 | 0 97.880975 up         | Inf         | 6.99E-29 | 1.46E-28 |
| TCONS_00064329 | 0 97.797954 up         | Inf         | 6.99E-29 | 1.46E-28 |
| TCONS_00072741 | 0 97.764032 up         | Inf         | 6.99E-29 | 1.46E-28 |
| TCONS_00096863 | 4.7386384 97.720251 up | 4.366113096 | 1.62E-25 | 2.93E-25 |
| TCONS_00054417 | 0 97.720251 up         | Inf         | 6.99E-29 | 1.46E-28 |
| TCONS_00102585 | 0 97.720251 up         | Inf         | 6.99E-29 | 1.46E-28 |
| TCONS_00026121 | 0 97.624069 up         | Inf         | 6.99E-29 | 1.46E-28 |
| TCONS_00064991 | 26.720655 97.578873 up | 1.868613436 | 1.07E-14 | 1.35E-14 |
| TCONS_00012899 | 0 97.470572 up         | Inf         | 1.33E-28 | 2.72E-28 |
| TCONS_00044075 | 0 97.453547 up         | Inf         | 1.33E-28 | 2.72E-28 |
| TCONS_00012789 | 0 97.396073 up         | Inf         | 1.33E-28 | 2.72E-28 |
| TCONS_00032864 | 0 97.368509 up         | Inf         | 1.33E-28 | 2.72E-28 |
| TCONS_00054488 | 0 97.269696 up         | Inf         | 1.33E-28 | 2.72E-28 |
| TCONS_00012636 | 0 97.24123 up          | Inf         | 1.33E-28 | 2.72E-28 |
| TCONS_00055328 | 0 97.24123 up          | Inf         | 1.33E-28 | 2.72E-28 |
| TCONS_00064131 | 0 97.24123 up          | Inf         | 1.33E-28 | 2.72E-28 |
| TCONS_00044109 | 0 97.165022 up         | Inf         | 1.33E-28 | 2.72E-28 |
| TCONS_00043767 | 0 97.15052 up          | Inf         | 1.33E-28 | 2.72E-28 |
| TCONS_00026230 | 0 97.129201 up         | Inf         | 1.33E-28 | 2.72E-28 |
| TCONS_00081675 | 0 97.029836 up         | Inf         | 1.33E-28 | 2.72E-28 |
| TCONS_00054779 | 0 96.941103 up         | Inf         | 1.33E-28 | 2.72E-28 |
| TCONS_00043965 | 0 96.913598 up         | Inf         | 1.33E-28 | 2.72E-28 |
| TCONS_00064492 | 12.515995 96.789365 up | 2.951075596 | 1.18E-20 | 1.78E-20 |
| TCONS_00043649 | 4.0588337 96.779642 up | 4.575566461 | 7.00E-26 | 1.29E-25 |
| TCONS_00043891 | 0 96.766882 up         | Inf         | 1.33E-28 | 2.72E-28 |
| TCONS_00089059 | 0 96.766882 up         | Inf         | 1.33E-28 | 2.72E-28 |

|                |           |           |    |             |          |           |
|----------------|-----------|-----------|----|-------------|----------|-----------|
| TCONS_00096605 | 0         | 96.766882 | up | Inf         | 1.33E-28 | 2.72E-28  |
| TCONS_00043963 | 0         | 96.749403 | up | Inf         | 1.33E-28 | 2.72E-28  |
| TCONS_00072417 | 0         | 96.683654 | up | Inf         | 1.33E-28 | 2.72E-28  |
| TCONS_00011802 | 0         | 96.653077 | up | Inf         | 1.33E-28 | 2.72E-28  |
| TCONS_00081285 | 0         | 96.609793 | up | Inf         | 1.33E-28 | 2.72E-28  |
| TCONS_00096402 | 0         | 96.559632 | up | Inf         | 1.33E-28 | 2.72E-28  |
| TCONS_00043449 | 0         | 96.543803 | up | Inf         | 1.33E-28 | 2.72E-28  |
| TCONS_00043608 | 5.5443434 | 96.470586 | up | 4.121000598 | 2.42E-24 | 4.20E-24  |
| TCONS_00018859 | 0         | 96.327309 | up | Inf         | 2.51E-28 | 5.09E-28  |
| TCONS_00064705 | 0         | 96.29714  | up | Inf         | 2.51E-28 | 5.09E-28  |
| TCONS_00081728 | 0         | 96.29714  | up | Inf         | 2.51E-28 | 5.09E-28  |
| TCONS_00018787 | 0         | 96.242176 | up | Inf         | 2.51E-28 | 5.09E-28  |
| TCONS_00043233 | 4.9712847 | 96.110518 | up | 4.273003691 | 5.76E-25 | 1.02E-24  |
| TCONS_00072947 | 0         | 96.075053 | up | Inf         | 2.51E-28 | 5.09E-28  |
| TCONS_00011748 | 0         | 96.042834 | up | Inf         | 2.51E-28 | 5.09E-28  |
| TCONS_00012733 | 0         | 95.96174  | up | Inf         | 2.51E-28 | 5.09E-28  |
| TCONS_00096873 | 0         | 95.96174  | up | Inf         | 2.51E-28 | 5.09E-28  |
| TCONS_00102608 | 0         | 95.852069 | up | Inf         | 2.51E-28 | 5.09E-28  |
| TCONS_00081394 | 13.941211 | 95.831937 | up | 2.781150595 | 7.08E-20 | 1.03E-19  |
| TCONS_00102509 | 0         | 95.769416 | up | Inf         | 2.51E-28 | 5.09E-28  |
| TCONS_00032879 | 0         | 95.739435 | up | Inf         | 2.51E-28 | 5.09E-28  |
| TCONS_00064854 | 0         | 95.705842 | up | Inf         | 2.51E-28 | 5.09E-28  |
| TCONS_00026091 | 34.023728 | 95.677866 | up | 1.491643978 | 8.03E-12 | 9.58E-12  |
| TCONS_00073162 | 0         | 95.371206 | up | Inf         | 4.77E-28 | 9.51E-28  |
| TCONS_00011789 | 0         | 95.371206 | up | Inf         | 4.77E-28 | 9.51E-28  |
| TCONS_00012692 | 0         | 95.371206 | up | Inf         | 4.77E-28 | 9.51E-28  |
| TCONS_00026083 | 0         | 95.371206 | up | Inf         | 4.77E-28 | 9.51E-28  |
| TCONS_00043546 | 0         | 95.371206 | up | Inf         | 4.77E-28 | 9.51E-28  |
| TCONS_00096389 | 0         | 95.371206 | up | Inf         | 4.77E-28 | 9.51E-28  |
| TCONS_00043055 | 0         | 95.066506 | up | Inf         | 4.77E-28 | 9.51E-28  |
| TCONS_00054424 | 0         | 95.066506 | up | Inf         | 4.77E-28 | 9.51E-28  |
| TCONS_00006522 | 77.236346 | 95.023136 | up | 0.2989989   | 0.003195 | 0.0033775 |
| TCONS_00055145 | 0         | 95.023136 | up | Inf         | 4.77E-28 | 9.51E-28  |
| TCONS_00072900 | 0         | 95.005799 | up | Inf         | 4.77E-28 | 9.51E-28  |
| TCONS_00012630 | 0         | 94.941606 | up | Inf         | 4.77E-28 | 9.51E-28  |
| TCONS_00012958 | 0         | 94.941606 | up | Inf         | 4.77E-28 | 9.51E-28  |
| TCONS_00025835 | 0         | 94.914885 | up | Inf         | 4.77E-28 | 9.51E-28  |
| TCONS_00044093 | 2.4539377 | 94.884618 | up | 5.273003691 | 1.18E-26 | 2.24E-26  |
| TCONS_00033094 | 0         | 94.643182 | up | Inf         | 4.77E-28 | 9.51E-28  |
| TCONS_00043861 | 0         | 94.618276 | up | Inf         | 4.77E-28 | 9.51E-28  |
| TCONS_00018991 | 0         | 94.605172 | up | Inf         | 4.77E-28 | 9.51E-28  |
| TCONS_00072831 | 2.0957377 | 94.540085 | up | 5.495396113 | 1.18E-26 | 2.24E-26  |
| TCONS_00013160 | 0         | 94.532163 | up | Inf         | 4.77E-28 | 9.51E-28  |
| TCONS_00043360 | 0         | 94.532163 | up | Inf         | 4.77E-28 | 9.51E-28  |
| TCONS_00049672 | 0         | 94.515859 | up | Inf         | 4.77E-28 | 9.51E-28  |
| TCONS_00012694 | 3.3285245 | 94.381194 | up | 4.825544714 | 1.05E-25 | 1.93E-25  |
| TCONS_00096809 | 3.3285245 | 94.381194 | up | 4.825544714 | 1.05E-25 | 1.93E-25  |
| TCONS_00102500 | 2.0866455 | 94.129932 | up | 5.495396113 | 2.24E-26 | 4.20E-26  |
| TCONS_00054642 | 0         | 94.031723 | up | Inf         | 9.04E-28 | 1.79E-27  |

|                |            |                 |              |           |           |
|----------------|------------|-----------------|--------------|-----------|-----------|
| TCONS_00044210 |            | 0 94. 015217 up | Inf          | 9. 04E-28 | 1. 79E-27 |
| TCONS_00025870 | 4. 2800605 | 93. 779918 up   | 4. 453575937 | 4. 73E-25 | 8. 45E-25 |
| TCONS_00081448 |            | 0 93. 736821 up | Inf          | 9. 04E-28 | 1. 79E-27 |
| TCONS_00026237 |            | 0 93. 675718 up | Inf          | 9. 04E-28 | 1. 79E-27 |
| TCONS_00073014 |            | 0 93. 675718 up | Inf          | 9. 04E-28 | 1. 79E-27 |
| TCONS_00032963 |            | 0 93. 571749 up | Inf          | 9. 04E-28 | 1. 79E-27 |
| TCONS_00054410 |            | 0 93. 571749 up | Inf          | 9. 04E-28 | 1. 79E-27 |
| TCONS_00018732 |            | 0 93. 514832 up | Inf          | 9. 04E-28 | 1. 79E-27 |
| TCONS_00096424 |            | 0 93. 514832 up | Inf          | 9. 04E-28 | 1. 79E-27 |
| TCONS_00018638 |            | 0 93. 411524 up | Inf          | 1. 71E-27 | 3. 36E-27 |
| TCONS_00096956 |            | 0 93. 278421 up | Inf          | 1. 71E-27 | 3. 36E-27 |
| TCONS_00089504 |            | 0 93. 261224 up | Inf          | 1. 71E-27 | 3. 36E-27 |
| TCONS_00089631 |            | 0 93. 184351 up | Inf          | 1. 71E-27 | 3. 36E-27 |
| TCONS_00012463 |            | 0 92. 986926 up | Inf          | 1. 71E-27 | 3. 36E-27 |
| TCONS_00088988 |            | 0 92. 801323 up | Inf          | 1. 71E-27 | 3. 36E-27 |
| TCONS_00018826 |            | 0 92. 776071 up | Inf          | 1. 71E-27 | 3. 36E-27 |
| TCONS_00096833 |            | 0 92. 742866 up | Inf          | 1. 71E-27 | 3. 36E-27 |
| TCONS_00057598 | 4. 4950635 | 92. 697247 up   | 4. 366113096 | 8. 95E-25 | 1. 58E-24 |
| TCONS_00054467 | 3. 9914672 | 92. 601088 up   | 4. 536038097 | 8. 95E-25 | 1. 58E-24 |
| TCONS_00043181 |            | 0 92. 524305 up | Inf          | 1. 71E-27 | 3. 36E-27 |
| TCONS_00018910 |            | 0 92. 443143 up | Inf          | 3. 25E-27 | 6. 28E-27 |
| TCONS_00026171 |            | 0 92. 266097 up | Inf          | 3. 25E-27 | 6. 28E-27 |
| TCONS_00012819 |            | 0 92. 180348 up | Inf          | 3. 25E-27 | 6. 28E-27 |
| TCONS_00064644 | 5. 103149  | 92. 082544 up   | 4. 173468018 | 7. 31E-24 | 1. 24E-23 |
| TCONS_00012901 |            | 0 92. 066263 up | Inf          | 3. 25E-27 | 6. 28E-27 |
| TCONS_00032781 |            | 0 92. 066263 up | Inf          | 3. 25E-27 | 6. 28E-27 |
| TCONS_00054483 |            | 0 92. 066263 up | Inf          | 3. 25E-27 | 6. 28E-27 |
| TCONS_00055357 |            | 0 92. 066263 up | Inf          | 3. 25E-27 | 6. 28E-27 |
| TCONS_00064140 |            | 0 92. 066263 up | Inf          | 3. 25E-27 | 6. 28E-27 |
| TCONS_00064506 |            | 0 92. 066263 up | Inf          | 3. 25E-27 | 6. 28E-27 |
| TCONS_00072826 |            | 0 92. 066263 up | Inf          | 3. 25E-27 | 6. 28E-27 |
| TCONS_00073002 |            | 0 92. 066263 up | Inf          | 3. 25E-27 | 6. 28E-27 |
| TCONS_00081742 |            | 0 92. 066263 up | Inf          | 3. 25E-27 | 6. 28E-27 |
| TCONS_00088986 |            | 0 92. 066263 up | Inf          | 3. 25E-27 | 6. 28E-27 |
| TCONS_00096370 |            | 0 92. 066263 up | Inf          | 3. 25E-27 | 6. 28E-27 |
| TCONS_00055603 |            | 0 92. 018312 up | Inf          | 3. 25E-27 | 6. 28E-27 |
| TCONS_00012688 |            | 0 92. 001199 up | Inf          | 3. 25E-27 | 6. 28E-27 |
| TCONS_00043646 | 61. 830737 | 91. 952461 up   | 0. 572563973 | 8. 98E-05 | 9. 71E-05 |
| TCONS_00102448 | 4. 4534425 | 91. 838939 up   | 4. 366113096 | 1. 69E-24 | 2. 96E-24 |
| TCONS_00026305 |            | 0 91. 838939 up | Inf          | 3. 25E-27 | 6. 28E-27 |
| TCONS_00055436 |            | 0 91. 838939 up | Inf          | 3. 25E-27 | 6. 28E-27 |
| TCONS_00081529 |            | 0 91. 838939 up | Inf          | 3. 25E-27 | 6. 28E-27 |
| TCONS_00081716 |            | 0 91. 838939 up | Inf          | 3. 25E-27 | 6. 28E-27 |
| TCONS_00096503 |            | 0 91. 713133 up | Inf          | 3. 25E-27 | 6. 28E-27 |
| TCONS_00018745 |            | 0 91. 612735 up | Inf          | 3. 25E-27 | 6. 28E-27 |
| TCONS_00054639 |            | 0 91. 612735 up | Inf          | 3. 25E-27 | 6. 28E-27 |
| TCONS_00089127 |            | 0 91. 612735 up | Inf          | 3. 25E-27 | 6. 28E-27 |
| TCONS_00089622 |            | 0 91. 612735 up | Inf          | 3. 25E-27 | 6. 28E-27 |
| TCONS_00043197 |            | 0 91. 415718 up | Inf          | 6. 16E-27 | 1. 18E-26 |



|                |           |           |    |             |          |          |
|----------------|-----------|-----------|----|-------------|----------|----------|
| TCONS_00055650 | 0         | 91.415718 | up | Inf         | 6.16E-27 | 1.18E-26 |
| TCONS_00102461 | 0         | 91.397406 | up | Inf         | 6.16E-27 | 1.18E-26 |
| TCONS_00064389 | 0         | 91.304992 | up | Inf         | 6.16E-27 | 1.18E-26 |
| TCONS_00019118 | 0         | 91.163653 | up | Inf         | 6.16E-27 | 1.18E-26 |
| TCONS_00055374 | 0         | 91.163653 | up | Inf         | 6.16E-27 | 1.18E-26 |
| TCONS_00064346 | 0         | 91.163653 | up | Inf         | 6.16E-27 | 1.18E-26 |
| TCONS_00096493 | 0         | 91.163653 | up | Inf         | 6.16E-27 | 1.18E-26 |
| TCONS_00055586 | 0         | 91.089234 | up | Inf         | 6.16E-27 | 1.18E-26 |
| TCONS_00081719 | 0         | 90.896311 | up | Inf         | 6.16E-27 | 1.18E-26 |
| TCONS_00012088 | 0         | 90.877275 | up | Inf         | 6.16E-27 | 1.18E-26 |
| TCONS_00043041 | 0         | 90.877275 | up | Inf         | 6.16E-27 | 1.18E-26 |
| TCONS_00073055 | 0         | 90.804134 | up | Inf         | 6.16E-27 | 1.18E-26 |
| TCONS_00043179 | 0         | 90.718952 | up | Inf         | 6.16E-27 | 1.18E-26 |
| TCONS_00043507 | 0         | 90.718952 | up | Inf         | 6.16E-27 | 1.18E-26 |
| TCONS_00081052 | 0         | 90.718952 | up | Inf         | 6.16E-27 | 1.18E-26 |
| TCONS_00088918 | 0         | 90.718952 | up | Inf         | 6.16E-27 | 1.18E-26 |
| TCONS_00096554 | 0         | 90.718952 | up | Inf         | 6.16E-27 | 1.18E-26 |
| TCONS_00102508 | 0         | 90.718952 | up | Inf         | 6.16E-27 | 1.18E-26 |
| TCONS_00012372 | 0         | 90.673818 | up | Inf         | 6.16E-27 | 1.18E-26 |
| TCONS_00044205 | 59.051697 | 90.449916 | up | 0.615140644 | 5.94E-05 | 6.43E-05 |
| TCONS_00043020 | 0         | 90.351669 | up | Inf         | 1.17E-26 | 2.21E-26 |
| TCONS_00055182 | 18.861639 | 90.295428 | up | 2.259197892 | 5.69E-16 | 7.38E-16 |
| TCONS_00064376 | 0         | 90.278569 | up | Inf         | 1.17E-26 | 2.21E-26 |
| TCONS_00018817 | 0         | 90.16914  | up | Inf         | 1.17E-26 | 2.21E-26 |
| TCONS_00089360 | 0         | 90.072806 | up | Inf         | 1.17E-26 | 2.21E-26 |
| TCONS_00012859 | 0         | 89.987348 | up | Inf         | 1.17E-26 | 2.21E-26 |
| TCONS_00081262 | 0         | 89.896726 | up | Inf         | 1.17E-26 | 2.21E-26 |
| TCONS_00089515 | 0         | 89.896726 | up | Inf         | 1.17E-26 | 2.21E-26 |
| TCONS_00064610 | 0         | 89.842441 | up | Inf         | 1.17E-26 | 2.21E-26 |
| TCONS_00089075 | 0         | 89.842441 | up | Inf         | 1.17E-26 | 2.21E-26 |
| TCONS_00064236 | 0         | 89.792389 | up | Inf         | 1.17E-26 | 2.21E-26 |
| TCONS_00055116 | 0         | 89.761135 | up | Inf         | 1.17E-26 | 2.21E-26 |
| TCONS_00089533 | 4.093377  | 89.689517 | up | 4.453575937 | 6.05E-24 | 1.04E-23 |
| TCONS_00032750 | 0         | 89.689517 | up | Inf         | 1.17E-26 | 2.21E-26 |
| TCONS_00044122 | 28.786342 | 89.663204 | up | 1.63913159  | 4.08E-12 | 4.91E-12 |
| TCONS_00089055 | 3.8632273 | 89.625953 | up | 4.536038097 | 6.05E-24 | 1.04E-23 |
| TCONS_00102786 | 0         | 89.506132 | up | Inf         | 1.17E-26 | 2.21E-26 |
| TCONS_00043407 | 0         | 89.410506 | up | Inf         | 2.22E-26 | 4.15E-26 |
| TCONS_00044089 | 0         | 89.410506 | up | Inf         | 2.22E-26 | 4.15E-26 |
| TCONS_00072461 | 0         | 89.410506 | up | Inf         | 2.22E-26 | 4.15E-26 |
| TCONS_00026061 | 0         | 89.386631 | up | Inf         | 2.22E-26 | 4.15E-26 |
| TCONS_00102493 | 0         | 89.229879 | up | Inf         | 2.22E-26 | 4.15E-26 |
| TCONS_00018718 | 0         | 89.196092 | up | Inf         | 2.22E-26 | 4.15E-26 |
| TCONS_00064962 | 0         | 89.137794 | up | Inf         | 2.22E-26 | 4.15E-26 |
| TCONS_00073032 | 0         | 89.08927  | up | Inf         | 2.22E-26 | 4.15E-26 |
| TCONS_00089537 | 0         | 89.067937 | up | Inf         | 2.22E-26 | 4.15E-26 |
| TCONS_00064266 | 0         | 89.030036 | up | Inf         | 2.22E-26 | 4.15E-26 |
| TCONS_00012596 | 0         | 88.921924 | up | Inf         | 2.22E-26 | 4.15E-26 |
| TCONS_00043291 | 0         | 88.893162 | up | Inf         | 2.22E-26 | 4.15E-26 |

|                |           |           |    |             |          |           |
|----------------|-----------|-----------|----|-------------|----------|-----------|
| TCONS_00012283 | 0         | 88.847443 | up | Inf         | 2.22E-26 | 4.15E-26  |
| TCONS_00096836 | 0         | 88.847443 | up | Inf         | 2.22E-26 | 4.15E-26  |
| TCONS_00081679 | 73.465859 | 88.770335 | up | 0.273003691 | 0.005338 | 0.0056308 |
| TCONS_00011868 | 0         | 88.558977 | up | Inf         | 2.22E-26 | 4.15E-26  |
| TCONS_00043305 | 0         | 88.558977 | up | Inf         | 2.22E-26 | 4.15E-26  |
| TCONS_00043672 | 0         | 88.558977 | up | Inf         | 2.22E-26 | 4.15E-26  |
| TCONS_00088973 | 0         | 88.558977 | up | Inf         | 2.22E-26 | 4.15E-26  |
| TCONS_00089371 | 0         | 88.558977 | up | Inf         | 2.22E-26 | 4.15E-26  |
| TCONS_00081416 | 3.602785  | 88.227296 | up | 4.614040609 | 2.16E-23 | 3.61E-23  |
| TCONS_00102545 | 0         | 88.227296 | up | Inf         | 4.20E-26 | 7.79E-26  |
| TCONS_00011867 | 0         | 88.208942 | up | Inf         | 4.20E-26 | 7.79E-26  |
| TCONS_00043493 | 0         | 88.109439 | up | Inf         | 4.20E-26 | 7.79E-26  |
| TCONS_00036912 | 0         | 88.012317 | up | Inf         | 4.20E-26 | 7.79E-26  |
| TCONS_00064409 | 0         | 88.012317 | up | Inf         | 4.20E-26 | 7.79E-26  |
| TCONS_00064947 | 0         | 88.012317 | up | Inf         | 4.20E-26 | 7.79E-26  |
| TCONS_00013101 | 0         | 87.960606 | up | Inf         | 4.20E-26 | 7.79E-26  |
| TCONS_00102687 | 0         | 87.861662 | up | Inf         | 4.20E-26 | 7.79E-26  |
| TCONS_00046804 | 0         | 87.775269 | up | Inf         | 4.20E-26 | 7.79E-26  |
| TCONS_00064191 | 0         | 87.723515 | up | Inf         | 4.20E-26 | 7.79E-26  |
| TCONS_00081816 | 0         | 87.694987 | up | Inf         | 4.20E-26 | 7.79E-26  |
| TCONS_00102595 | 0         | 87.620189 | up | Inf         | 4.20E-26 | 7.79E-26  |
| TCONS_00055173 | 0         | 87.571331 | up | Inf         | 4.20E-26 | 7.79E-26  |
| TCONS_00033171 | 0         | 87.472364 | up | Inf         | 7.97E-26 | 1.47E-25  |
| TCONS_00013102 | 0         | 87.423606 | up | Inf         | 7.97E-26 | 1.47E-25  |
| TCONS_00054499 | 0         | 87.388594 | up | Inf         | 7.97E-26 | 1.47E-25  |
| TCONS_00096911 | 0         | 87.311668 | up | Inf         | 7.97E-26 | 1.47E-25  |
| TCONS_00102748 | 0         | 87.311668 | up | Inf         | 7.97E-26 | 1.47E-25  |
| TCONS_00013080 | 0         | 87.260458 | up | Inf         | 7.97E-26 | 1.47E-25  |
| TCONS_00043145 | 0         | 87.144297 | up | Inf         | 7.97E-26 | 1.47E-25  |
| TCONS_00013067 | 0         | 87.122886 | up | Inf         | 7.97E-26 | 1.47E-25  |
| TCONS_00012505 | 0         | 87.095192 | up | Inf         | 7.97E-26 | 1.47E-25  |
| TCONS_00049539 | 33.591681 | 86.591    | up | 1.366113096 | 7.00E-10 | 8.08E-10  |
| TCONS_00032625 | 0         | 86.499466 | up | Inf         | 1.51E-25 | 2.74E-25  |
| TCONS_00096642 | 0         | 86.499466 | up | Inf         | 1.51E-25 | 2.74E-25  |
| TCONS_00102541 | 42.360819 | 86.446561 | up | 1.029078108 | 1.38E-07 | 1.55E-07  |
| TCONS_00012438 | 0         | 86.369879 | up | Inf         | 1.51E-25 | 2.74E-25  |
| TCONS_00055585 | 0         | 86.356018 | up | Inf         | 1.51E-25 | 2.74E-25  |
| TCONS_00081082 | 0         | 86.288234 | up | Inf         | 1.51E-25 | 2.74E-25  |
| TCONS_00026224 | 0         | 86.19109  | up | Inf         | 1.51E-25 | 2.74E-25  |
| TCONS_00033131 | 0         | 86.130486 | up | Inf         | 1.51E-25 | 2.74E-25  |
| TCONS_00026273 | 0         | 86.099006 | up | Inf         | 1.51E-25 | 2.74E-25  |
| TCONS_00011837 | 3.9263004 | 86.028721 | up | 4.453575937 | 7.73E-23 | 1.26E-22  |
| TCONS_00064923 | 0         | 85.999469 | up | Inf         | 1.51E-25 | 2.74E-25  |
| TCONS_00019154 | 0         | 85.983436 | up | Inf         | 1.51E-25 | 2.74E-25  |
| TCONS_00012648 | 0         | 85.928513 | up | Inf         | 1.51E-25 | 2.74E-25  |
| TCONS_00012950 | 0         | 85.928513 | up | Inf         | 1.51E-25 | 2.74E-25  |
| TCONS_00033193 | 0         | 85.928513 | up | Inf         | 1.51E-25 | 2.74E-25  |
| TCONS_00080986 | 0         | 85.928513 | up | Inf         | 1.51E-25 | 2.74E-25  |
| TCONS_00032768 | 0         | 85.875372 | up | Inf         | 1.51E-25 | 2.74E-25  |

|                |           |           |    |             |          |          |
|----------------|-----------|-----------|----|-------------|----------|----------|
| TCONS_00089644 | 0         | 85.875372 | up | Inf         | 1.51E-25 | 2.74E-25 |
| TCONS_00012942 | 0         | 85.834086 | up | Inf         | 1.51E-25 | 2.74E-25 |
| TCONS_00102621 | 0         | 85.834086 | up | Inf         | 1.51E-25 | 2.74E-25 |
| TCONS_00026160 | 0         | 85.801085 | up | Inf         | 1.51E-25 | 2.74E-25 |
| TCONS_00025939 | 0         | 85.774104 | up | Inf         | 1.51E-25 | 2.74E-25 |
| TCONS_00089005 | 0         | 85.702236 | up | Inf         | 1.51E-25 | 2.74E-25 |
| TCONS_00055217 | 14.615165 | 85.62332  | up | 2.550537667 | 9.16E-17 | 1.21E-16 |
| TCONS_00072923 | 0         | 85.62332  | up | Inf         | 1.51E-25 | 2.74E-25 |
| TCONS_00019093 | 49.755703 | 85.505219 | up | 0.781150595 | 6.75E-06 | 7.37E-06 |
| TCONS_00012159 | 0         | 85.505219 | up | Inf         | 1.51E-25 | 2.74E-25 |
| TCONS_00064667 | 0         | 85.505219 | up | Inf         | 1.51E-25 | 2.74E-25 |
| TCONS_00089453 | 0         | 85.505219 | up | Inf         | 1.51E-25 | 2.74E-25 |
| TCONS_00096344 | 0         | 85.505219 | up | Inf         | 1.51E-25 | 2.74E-25 |
| TCONS_00064490 | 0         | 85.396157 | up | Inf         | 2.87E-25 | 5.14E-25 |
| TCONS_00064464 | 0         | 85.309106 | up | Inf         | 2.87E-25 | 5.14E-25 |
| TCONS_00096855 | 0         | 85.295133 | up | Inf         | 2.87E-25 | 5.14E-25 |
| TCONS_00089442 | 0         | 85.238016 | up | Inf         | 2.87E-25 | 5.14E-25 |
| TCONS_00072615 | 0         | 85.152863 | up | Inf         | 2.87E-25 | 5.14E-25 |
| TCONS_00018876 | 0         | 85.086076 | up | Inf         | 2.87E-25 | 5.14E-25 |
| TCONS_00026165 | 0         | 85.086076 | up | Inf         | 2.87E-25 | 5.14E-25 |
| TCONS_00043491 | 0         | 85.086076 | up | Inf         | 2.87E-25 | 5.14E-25 |
| TCONS_00054566 | 0         | 85.086076 | up | Inf         | 2.87E-25 | 5.14E-25 |
| TCONS_00072584 | 0         | 85.086076 | up | Inf         | 2.87E-25 | 5.14E-25 |
| TCONS_00089231 | 0         | 85.086076 | up | Inf         | 2.87E-25 | 5.14E-25 |
| TCONS_00096771 | 0         | 84.808923 | up | Inf         | 2.87E-25 | 5.14E-25 |
| TCONS_00013192 | 4.6924077 | 84.671022 | up | 4.173468018 | 6.23E-22 | 9.82E-22 |
| TCONS_00025955 | 0         | 84.671022 | up | Inf         | 2.87E-25 | 5.14E-25 |
| TCONS_00064168 | 0         | 84.671022 | up | Inf         | 2.87E-25 | 5.14E-25 |
| TCONS_00089093 | 0         | 84.671022 | up | Inf         | 2.87E-25 | 5.14E-25 |
| TCONS_00033192 | 0         | 84.646733 | up | Inf         | 2.87E-25 | 5.14E-25 |
| TCONS_00043909 | 0         | 84.629739 | up | Inf         | 2.87E-25 | 5.14E-25 |
| TCONS_00054459 | 0         | 84.533569 | up | Inf         | 2.87E-25 | 5.14E-25 |
| TCONS_00055456 | 0         | 84.533569 | up | Inf         | 2.87E-25 | 5.14E-25 |
| TCONS_00044015 | 0         | 84.47164  | up | Inf         | 5.44E-25 | 9.65E-25 |
| TCONS_00013138 | 0         | 84.308146 | up | Inf         | 5.44E-25 | 9.65E-25 |
| TCONS_00081578 | 0         | 84.259998 | up | Inf         | 5.44E-25 | 9.65E-25 |
| TCONS_00102447 | 0         | 84.259998 | up | Inf         | 5.44E-25 | 9.65E-25 |
| TCONS_00072616 | 0         | 83.99903  | up | Inf         | 5.44E-25 | 9.65E-25 |
| TCONS_00064963 | 0         | 83.988191 | up | Inf         | 5.44E-25 | 9.65E-25 |
| TCONS_00089354 | 0         | 83.94653  | up | Inf         | 5.44E-25 | 9.65E-25 |
| TCONS_00026331 | 0         | 83.852945 | up | Inf         | 5.44E-25 | 9.65E-25 |
| TCONS_00032938 | 0         | 83.852945 | up | Inf         | 5.44E-25 | 9.65E-25 |
| TCONS_00043089 | 0         | 83.852945 | up | Inf         | 5.44E-25 | 9.65E-25 |
| TCONS_00043388 | 0         | 83.852945 | up | Inf         | 5.44E-25 | 9.65E-25 |
| TCONS_00064949 | 0         | 83.852945 | up | Inf         | 5.44E-25 | 9.65E-25 |
| TCONS_00072609 | 0         | 83.852945 | up | Inf         | 5.44E-25 | 9.65E-25 |
| TCONS_00102281 | 0         | 83.852945 | up | Inf         | 5.44E-25 | 9.65E-25 |
| TCONS_00102457 | 0         | 83.852945 | up | Inf         | 5.44E-25 | 9.65E-25 |
| TCONS_00044074 | 0         | 83.805314 | up | Inf         | 5.44E-25 | 9.65E-25 |

|                |           |           |    |             |          |          |
|----------------|-----------|-----------|----|-------------|----------|----------|
| TCONS_00064372 | 0         | 83.772005 | up | Inf         | 5.44E-25 | 9.65E-25 |
| TCONS_00081289 | 0         | 83.772005 | up | Inf         | 5.44E-25 | 9.65E-25 |
| TCONS_00043267 | 0         | 83.772005 | up | Inf         | 5.44E-25 | 9.65E-25 |
| TCONS_00043843 | 0         | 83.718133 | up | Inf         | 5.44E-25 | 9.65E-25 |
| TCONS_00102743 | 0         | 83.449805 | up | Inf         | 1.03E-24 | 1.81E-24 |
| TCONS_00012944 | 0         | 83.349626 | up | Inf         | 1.03E-24 | 1.81E-24 |
| TCONS_00025869 | 0         | 83.349626 | up | Inf         | 1.03E-24 | 1.81E-24 |
| TCONS_00012099 | 0         | 83.295782 | up | Inf         | 1.03E-24 | 1.81E-24 |
| TCONS_00012755 | 0         | 83.271874 | up | Inf         | 1.03E-24 | 1.81E-24 |
| TCONS_00012219 | 6.7981879 | 83.23918  | up | 3.614040609 | 3.55E-20 | 5.25E-20 |
| TCONS_00096358 | 0         | 83.209777 | up | Inf         | 1.03E-24 | 1.81E-24 |
| TCONS_00089249 | 0         | 83.050524 | up | Inf         | 1.03E-24 | 1.81E-24 |
| TCONS_00096726 | 0         | 83.050524 | up | Inf         | 1.03E-24 | 1.81E-24 |
| TCONS_00042985 | 0         | 83.024041 | up | Inf         | 1.03E-24 | 1.81E-24 |
| TCONS_00025890 | 0         | 82.859637 | up | Inf         | 1.03E-24 | 1.81E-24 |
| TCONS_00012303 | 0         | 82.808394 | up | Inf         | 1.03E-24 | 1.81E-24 |
| TCONS_00032891 | 0         | 82.655045 | up | Inf         | 1.03E-24 | 1.81E-24 |
| TCONS_00032914 | 0         | 82.655045 | up | Inf         | 1.03E-24 | 1.81E-24 |
| TCONS_00043829 | 0         | 82.655045 | up | Inf         | 1.03E-24 | 1.81E-24 |
| TCONS_00043952 | 0         | 82.655045 | up | Inf         | 1.03E-24 | 1.81E-24 |
| TCONS_00011965 | 0         | 82.493294 | up | Inf         | 1.96E-24 | 3.41E-24 |
| TCONS_00073028 | 29.998241 | 82.483205 | up | 1.4592225   | 5.22E-10 | 6.05E-10 |
| TCONS_00026090 | 63.987378 | 82.471775 | up | 0.366113096 | 0.003249 | 0.003433 |
| TCONS_00011953 | 0         | 82.458715 | up | Inf         | 1.96E-24 | 3.41E-24 |
| TCONS_00064126 | 0         | 82.451462 | up | Inf         | 1.96E-24 | 3.41E-24 |
| TCONS_00072553 | 0         | 82.451462 | up | Inf         | 1.96E-24 | 3.41E-24 |
| TCONS_00043410 | 0         | 82.443651 | up | Inf         | 1.96E-24 | 3.41E-24 |
| TCONS_00054565 | 0         | 82.366042 | up | Inf         | 1.96E-24 | 3.41E-24 |
| TCONS_00081450 | 0         | 82.263315 | up | Inf         | 1.96E-24 | 3.41E-24 |
| TCONS_00081454 | 0         | 82.216557 | up | Inf         | 1.96E-24 | 3.41E-24 |
| TCONS_00012083 | 0         | 82.011815 | up | Inf         | 1.96E-24 | 3.41E-24 |
| TCONS_00102362 | 0         | 81.971946 | up | Inf         | 1.96E-24 | 3.41E-24 |
| TCONS_00012606 | 0         | 81.942502 | up | Inf         | 1.96E-24 | 3.41E-24 |
| TCONS_00055274 | 0         | 81.794055 | up | Inf         | 1.96E-24 | 3.41E-24 |
| TCONS_00089582 | 0         | 81.69394  | up | Inf         | 1.96E-24 | 3.41E-24 |
| TCONS_00089530 | 2.2633967 | 81.682633 | up | 5.173468018 | 4.82E-23 | 7.91E-23 |
| TCONS_00089364 | 7.9172312 | 81.634613 | up | 3.366113096 | 2.50E-19 | 3.58E-19 |
| TCONS_00033119 | 0         | 81.522784 | up | Inf         | 1.96E-24 | 3.41E-24 |
| TCONS_00032786 | 0         | 81.49089  | up | Inf         | 3.72E-24 | 6.40E-24 |
| TCONS_00055132 | 0         | 81.49089  | up | Inf         | 3.72E-24 | 6.40E-24 |
| TCONS_00064339 | 0         | 81.49089  | up | Inf         | 3.72E-24 | 6.40E-24 |
| TCONS_00055069 | 0         | 81.421388 | up | Inf         | 3.72E-24 | 6.40E-24 |
| TCONS_00081775 | 0         | 81.36356  | up | Inf         | 3.72E-24 | 6.40E-24 |
| TCONS_00043066 | 0         | 81.300045 | up | Inf         | 3.72E-24 | 6.40E-24 |
| TCONS_00055331 | 0         | 81.300045 | up | Inf         | 3.72E-24 | 6.40E-24 |
| TCONS_00043299 | 0         | 81.250712 | up | Inf         | 3.72E-24 | 6.40E-24 |
| TCONS_00054563 | 0         | 81.179062 | up | Inf         | 3.72E-24 | 6.40E-24 |
| TCONS_00026046 | 0         | 81.110091 | up | Inf         | 3.72E-24 | 6.40E-24 |
| TCONS_00019066 | 1.5527742 | 81.053979 | up | 5.705963099 | 9.14E-23 | 1.49E-22 |

|                |           |           |    |             |          |           |
|----------------|-----------|-----------|----|-------------|----------|-----------|
| TCONS_00019002 | 0         | 81.011337 | up | Inf         | 3.72E-24 | 6.40E-24  |
| TCONS_00102388 | 0         | 81.011337 | up | Inf         | 3.72E-24 | 6.40E-24  |
| TCONS_00055449 | 0         | 80.993637 | up | Inf         | 3.72E-24 | 6.40E-24  |
| TCONS_00032886 | 0         | 80.781843 | up | Inf         | 3.72E-24 | 6.40E-24  |
| TCONS_00032682 | 0         | 80.754929 | up | Inf         | 3.72E-24 | 6.40E-24  |
| TCONS_00064625 | 62.638187 | 80.732835 | up | 0.366113096 | 0.003244 | 0.0034287 |
| TCONS_00064416 | 0         | 80.698713 | up | Inf         | 3.72E-24 | 6.40E-24  |
| TCONS_00064714 | 0         | 80.673589 | up | Inf         | 3.72E-24 | 6.40E-24  |
| TCONS_00012402 | 0         | 80.616468 | up | Inf         | 3.72E-24 | 6.40E-24  |
| TCONS_00055223 | 0         | 80.508161 | up | Inf         | 3.72E-24 | 6.40E-24  |
| TCONS_00044209 | 0         | 80.460664 | up | Inf         | 7.06E-24 | 1.20E-23  |
| TCONS_00072940 | 0         | 80.398252 | up | Inf         | 7.06E-24 | 1.20E-23  |
| TCONS_00026008 | 0         | 80.381626 | up | Inf         | 7.06E-24 | 1.20E-23  |
| TCONS_00089377 | 0         | 80.326734 | up | Inf         | 7.06E-24 | 1.20E-23  |
| TCONS_00055399 | 0         | 80.312595 | up | Inf         | 7.06E-24 | 1.20E-23  |
| TCONS_00055447 | 0         | 80.312595 | up | Inf         | 7.06E-24 | 1.20E-23  |
| TCONS_00096816 | 0         | 80.276483 | up | Inf         | 7.06E-24 | 1.20E-23  |
| TCONS_00089332 | 0         | 80.224015 | up | Inf         | 7.06E-24 | 1.20E-23  |
| TCONS_00019114 | 15.546563 | 80.150347 | up | 2.366113096 | 9.30E-15 | 1.18E-14  |
| TCONS_00019034 | 0         | 80.124789 | up | Inf         | 7.06E-24 | 1.20E-23  |
| TCONS_00089348 | 0         | 79.988754 | up | Inf         | 7.06E-24 | 1.20E-23  |
| TCONS_00064526 | 0         | 79.83726  | up | Inf         | 7.06E-24 | 1.20E-23  |
| TCONS_00055582 | 0         | 79.817104 | up | Inf         | 7.06E-24 | 1.20E-23  |
| TCONS_00102414 | 0         | 79.817104 | up | Inf         | 7.06E-24 | 1.20E-23  |
| TCONS_00012802 | 0         | 79.790762 | up | Inf         | 7.06E-24 | 1.20E-23  |
| TCONS_00013207 | 0         | 79.790762 | up | Inf         | 7.06E-24 | 1.20E-23  |
| TCONS_00025841 | 0         | 79.790762 | up | Inf         | 7.06E-24 | 1.20E-23  |
| TCONS_00081115 | 0         | 79.790762 | up | Inf         | 7.06E-24 | 1.20E-23  |
| TCONS_00064434 | 0         | 79.754868 | up | Inf         | 7.06E-24 | 1.20E-23  |
| TCONS_00081107 | 0         | 79.703079 | up | Inf         | 7.06E-24 | 1.20E-23  |
| TCONS_00012501 | 0         | 79.561006 | up | Inf         | 7.06E-24 | 1.20E-23  |
| TCONS_00055396 | 0         | 79.493885 | up | Inf         | 1.34E-23 | 2.25E-23  |
| TCONS_00012827 | 4.11087   | 79.476005 | up | 4.273003691 | 6.67E-21 | 1.01E-20  |
| TCONS_00055647 | 0         | 79.476005 | up | Inf         | 1.34E-23 | 2.25E-23  |
| TCONS_00089432 | 0         | 79.476005 | up | Inf         | 1.34E-23 | 2.25E-23  |
| TCONS_00081668 | 0         | 79.431729 | up | Inf         | 1.34E-23 | 2.25E-23  |
| TCONS_00019107 | 0         | 79.397704 | up | Inf         | 1.34E-23 | 2.25E-23  |
| TCONS_00025803 | 0         | 79.397704 | up | Inf         | 1.34E-23 | 2.25E-23  |
| TCONS_00032957 | 0         | 79.397704 | up | Inf         | 1.34E-23 | 2.25E-23  |
| TCONS_00043128 | 0         | 79.397704 | up | Inf         | 1.34E-23 | 2.25E-23  |
| TCONS_00064292 | 0         | 79.397704 | up | Inf         | 1.34E-23 | 2.25E-23  |
| TCONS_00025983 | 0         | 79.379083 | up | Inf         | 1.34E-23 | 2.25E-23  |
| TCONS_00055382 | 0         | 79.348844 | up | Inf         | 1.34E-23 | 2.25E-23  |
| TCONS_00064128 | 3.2388673 | 79.315448 | up | 4.614040609 | 1.52E-21 | 2.34E-21  |
| TCONS_00032683 | 0         | 79.190463 | up | Inf         | 1.34E-23 | 2.25E-23  |
| TCONS_00012826 | 0         | 79.137809 | up | Inf         | 1.34E-23 | 2.25E-23  |
| TCONS_00088949 | 0         | 79.070515 | up | Inf         | 1.34E-23 | 2.25E-23  |
| TCONS_00055454 | 7.6648891 | 79.032713 | up | 3.366113096 | 1.64E-18 | 2.28E-18  |
| TCONS_00012486 | 0         | 79.008499 | up | Inf         | 1.34E-23 | 2.25E-23  |

|                |           |                |             |          |           |
|----------------|-----------|----------------|-------------|----------|-----------|
| TCONS_00026200 |           | 0 79.008499 up | Inf         | 1.34E-23 | 2.25E-23  |
| TCONS_00054882 |           | 0 79.008499 up | Inf         | 1.34E-23 | 2.25E-23  |
| TCONS_00064880 |           | 0 79.008499 up | Inf         | 1.34E-23 | 2.25E-23  |
| TCONS_00072567 |           | 0 79.008499 up | Inf         | 1.34E-23 | 2.25E-23  |
| TCONS_00089216 |           | 0 79.008499 up | Inf         | 1.34E-23 | 2.25E-23  |
| TCONS_00102360 |           | 0 79.008499 up | Inf         | 1.34E-23 | 2.25E-23  |
| TCONS_00102746 |           | 0 79.008499 up | Inf         | 1.34E-23 | 2.25E-23  |
| TCONS_00018824 | 64.333807 | 78.969789 up   | 0.295723768 | 0.007118 | 0.0074781 |
| TCONS_00043376 |           | 0 78.940212 up | Inf         | 1.34E-23 | 2.25E-23  |
| TCONS_00054973 |           | 0 78.924088 up | Inf         | 1.34E-23 | 2.25E-23  |
| TCONS_00055519 |           | 0 78.897998 up | Inf         | 1.34E-23 | 2.25E-23  |
| TCONS_00055448 |           | 0 78.832847 up | Inf         | 1.34E-23 | 2.25E-23  |
| TCONS_00054806 |           | 0 78.815324 up | Inf         | 1.34E-23 | 2.25E-23  |
| TCONS_00054704 |           | 0 78.773455 up | Inf         | 1.34E-23 | 2.25E-23  |
| TCONS_00081184 |           | 0 78.645659 up | Inf         | 1.34E-23 | 2.25E-23  |
| TCONS_00081682 |           | 0 78.645659 up | Inf         | 1.34E-23 | 2.25E-23  |
| TCONS_00054860 |           | 0 78.563211 up | Inf         | 1.34E-23 | 2.25E-23  |
| TCONS_00012988 |           | 0 78.540993 up | Inf         | 1.34E-23 | 2.25E-23  |
| TCONS_00026087 |           | 0 78.540993 up | Inf         | 1.34E-23 | 2.25E-23  |
| TCONS_00011946 |           | 0 78.499205 up | Inf         | 2.54E-23 | 4.21E-23  |
| TCONS_00072655 |           | 0 78.407948 up | Inf         | 2.54E-23 | 4.21E-23  |
| TCONS_00081400 |           | 0 78.407948 up | Inf         | 2.54E-23 | 4.21E-23  |
| TCONS_00081300 |           | 0 78.379784 up | Inf         | 2.54E-23 | 4.21E-23  |
| TCONS_00012273 |           | 0 78.340634 up | Inf         | 2.54E-23 | 4.21E-23  |
| TCONS_00072351 |           | 0 78.30478 up  | Inf         | 2.54E-23 | 4.21E-23  |
| TCONS_00012993 |           | 0 78.241426 up | Inf         | 2.54E-23 | 4.21E-23  |
| TCONS_00054801 |           | 0 78.241426 up | Inf         | 2.54E-23 | 4.21E-23  |
| TCONS_00081551 |           | 0 78.241426 up | Inf         | 2.54E-23 | 4.21E-23  |
| TCONS_00072537 |           | 0 78.229919 up | Inf         | 2.54E-23 | 4.21E-23  |
| TCONS_00054608 |           | 0 78.187205 up | Inf         | 2.54E-23 | 4.21E-23  |
| TCONS_00089336 |           | 0 78.099255 up | Inf         | 2.54E-23 | 4.21E-23  |
| TCONS_00102769 |           | 0 78.063098 up | Inf         | 2.54E-23 | 4.21E-23  |
| TCONS_00022381 | 12.740975 | 78.002278 up   | 2.614040609 | 1.23E-15 | 1.58E-15  |
| TCONS_00026057 |           | 0 77.9319 up   | Inf         | 2.54E-23 | 4.21E-23  |
| TCONS_00054712 |           | 0 77.912543 up | Inf         | 2.54E-23 | 4.21E-23  |
| TCONS_00055429 |           | 0 77.863449 up | Inf         | 2.54E-23 | 4.21E-23  |
| TCONS_00081836 |           | 0 77.863449 up | Inf         | 2.54E-23 | 4.21E-23  |
| TCONS_00089351 |           | 0 77.863449 up | Inf         | 2.54E-23 | 4.21E-23  |
| TCONS_00089524 |           | 0 77.83659 up  | Inf         | 2.54E-23 | 4.21E-23  |
| TCONS_00012775 |           | 0 77.489105 up | Inf         | 4.82E-23 | 7.91E-23  |
| TCONS_00054711 |           | 0 77.489105 up | Inf         | 4.82E-23 | 7.91E-23  |
| TCONS_00054770 |           | 0 77.489105 up | Inf         | 4.82E-23 | 7.91E-23  |
| TCONS_00054958 |           | 0 77.489105 up | Inf         | 4.82E-23 | 7.91E-23  |
| TCONS_00089526 |           | 0 77.489105 up | Inf         | 4.82E-23 | 7.91E-23  |
| TCONS_00096333 |           | 0 77.489105 up | Inf         | 4.82E-23 | 7.91E-23  |
| TCONS_00043227 |           | 0 77.279107 up | Inf         | 4.82E-23 | 7.91E-23  |
| TCONS_00070513 | 66.570491 | 77.220977 up   | 0.214110002 | 0.023073 | 0.0239179 |
| TCONS_00013019 |           | 0 77.118344 up | Inf         | 4.82E-23 | 7.91E-23  |
| TCONS_00054885 |           | 0 77.118344 up | Inf         | 4.82E-23 | 7.91E-23  |

|                |           |              |             |          |           |
|----------------|-----------|--------------|-------------|----------|-----------|
| TCONS_00073144 | 0         | 77.118344 up | Inf         | 4.82E-23 | 7.91E-23  |
| TCONS_00088984 | 0         | 77.118344 up | Inf         | 4.82E-23 | 7.91E-23  |
| TCONS_00096413 | 0         | 77.118344 up | Inf         | 4.82E-23 | 7.91E-23  |
| TCONS_00089211 | 1.9916016 | 77.007806 up | 5.273003691 | 1.18E-21 | 1.84E-21  |
| TCONS_00054715 | 0         | 76.969044 up | Inf         | 4.82E-23 | 7.91E-23  |
| TCONS_00064139 | 0         | 76.803361 up | Inf         | 4.82E-23 | 7.91E-23  |
| TCONS_00072413 | 0         | 76.803361 up | Inf         | 4.82E-23 | 7.91E-23  |
| TCONS_00043144 | 0         | 76.751114 up | Inf         | 4.82E-23 | 7.91E-23  |
| TCONS_00081242 | 0         | 76.751114 up | Inf         | 4.82E-23 | 7.91E-23  |
| TCONS_00043793 | 0         | 76.643769 up | Inf         | 4.82E-23 | 7.91E-23  |
| TCONS_00064493 | 0         | 76.591548 up | Inf         | 4.82E-23 | 7.91E-23  |
| TCONS_00054719 | 0         | 76.532449 up | Inf         | 4.82E-23 | 7.91E-23  |
| TCONS_00043944 | 8.4752739 | 76.46502 up  | 3.173468018 | 1.07E-17 | 1.44E-17  |
| TCONS_00018775 | 0         | 76.387364 up | Inf         | 9.16E-23 | 1.49E-22  |
| TCONS_00096434 | 0         | 76.387364 up | Inf         | 9.16E-23 | 1.49E-22  |
| TCONS_00089197 | 0         | 76.296965 up | Inf         | 9.16E-23 | 1.49E-22  |
| TCONS_00089627 | 0         | 76.235236 up | Inf         | 9.16E-23 | 1.49E-22  |
| TCONS_00012904 | 0         | 76.156369 up | Inf         | 9.16E-23 | 1.49E-22  |
| TCONS_00064606 | 0         | 76.090385 up | Inf         | 9.16E-23 | 1.49E-22  |
| TCONS_00081557 | 0         | 76.090385 up | Inf         | 9.16E-23 | 1.49E-22  |
| TCONS_00012945 | 0         | 76.027046 up | Inf         | 9.16E-23 | 1.49E-22  |
| TCONS_00096482 | 0         | 76.027046 up | Inf         | 9.16E-23 | 1.49E-22  |
| TCONS_00065008 | 0         | 75.907695 up | Inf         | 9.16E-23 | 1.49E-22  |
| TCONS_00072494 | 0         | 75.816678 up | Inf         | 9.16E-23 | 1.49E-22  |
| TCONS_00043460 | 0         | 75.783966 up | Inf         | 9.16E-23 | 1.49E-22  |
| TCONS_00096787 | 62.060877 | 75.778819 up | 0.288110584 | 0.009241 | 0.0096846 |
| TCONS_00011855 | 0         | 75.670112 up | Inf         | 9.16E-23 | 1.49E-22  |
| TCONS_00043166 | 0         | 75.670112 up | Inf         | 9.16E-23 | 1.49E-22  |
| TCONS_00055033 | 0         | 75.670112 up | Inf         | 9.16E-23 | 1.49E-22  |
| TCONS_00055131 | 0         | 75.670112 up | Inf         | 9.16E-23 | 1.49E-22  |
| TCONS_00073053 | 0         | 75.522376 up | Inf         | 9.16E-23 | 1.49E-22  |
| TCONS_00096944 | 0         | 75.46765 up  | Inf         | 1.74E-22 | 2.80E-22  |
| TCONS_00096398 | 0         | 75.348522 up | Inf         | 1.74E-22 | 2.80E-22  |
| TCONS_00089367 | 0         | 75.316513 up | Inf         | 1.74E-22 | 2.80E-22  |
| TCONS_00089447 | 3.8945085 | 75.293058 up | 4.273003691 | 8.52E-20 | 1.25E-19  |
| TCONS_00011752 | 0         | 75.275131 up | Inf         | 1.74E-22 | 2.80E-22  |
| TCONS_00096587 | 0         | 75.249536 up | Inf         | 1.74E-22 | 2.80E-22  |
| TCONS_00088964 | 0         | 75.232141 up | Inf         | 1.74E-22 | 2.80E-22  |
| TCONS_00033017 | 0         | 75.21955 up  | Inf         | 1.74E-22 | 2.80E-22  |
| TCONS_00043150 | 0         | 75.14095 up  | Inf         | 1.74E-22 | 2.80E-22  |
| TCONS_00072775 | 0         | 75.14095 up  | Inf         | 1.74E-22 | 2.80E-22  |
| TCONS_00054678 | 0         | 75.049981 up | Inf         | 1.74E-22 | 2.80E-22  |
| TCONS_00089670 | 0         | 75.021299 up | Inf         | 1.74E-22 | 2.80E-22  |
| TCONS_00044135 | 0         | 75.007248 up | Inf         | 1.74E-22 | 2.80E-22  |
| TCONS_00102579 | 2.2370781 | 74.966204 up | 5.066552814 | 4.25E-21 | 6.51E-21  |
| TCONS_00011808 | 0         | 74.966204 up | Inf         | 1.74E-22 | 2.80E-22  |
| TCONS_00064946 | 0         | 74.84512 up  | Inf         | 1.74E-22 | 2.80E-22  |
| TCONS_00089251 | 0         | 74.763358 up | Inf         | 1.74E-22 | 2.80E-22  |
| TCONS_00012199 | 0         | 74.741264 up | Inf         | 1.74E-22 | 2.80E-22  |

|                |           |              |             |          |          |
|----------------|-----------|--------------|-------------|----------|----------|
| TCONS_00012955 | 0         | 74.638335 up | Inf         | 1.74E-22 | 2.80E-22 |
| TCONS_00054890 | 0         | 74.619138 up | Inf         | 1.74E-22 | 2.80E-22 |
| TCONS_00072492 | 0         | 74.546481 up | Inf         | 1.74E-22 | 2.80E-22 |
| TCONS_00081801 | 0         | 74.446808 up | Inf         | 3.30E-22 | 5.26E-22 |
| TCONS_00064302 | 0         | 74.321975 up | Inf         | 3.30E-22 | 5.26E-22 |
| TCONS_00012122 | 0         | 74.275271 up | Inf         | 3.30E-22 | 5.26E-22 |
| TCONS_00044147 | 0         | 74.275271 up | Inf         | 3.30E-22 | 5.26E-22 |
| TCONS_00054413 | 0         | 74.1424 up   | Inf         | 3.30E-22 | 5.26E-22 |
| TCONS_00012700 | 3.1080568 | 74.109128 up | 4.575566461 | 3.69E-20 | 5.47E-20 |
| TCONS_00081648 | 0         | 74.093168 up | Inf         | 3.30E-22 | 5.26E-22 |
| TCONS_00012670 | 0         | 74.019444 up | Inf         | 3.30E-22 | 5.26E-22 |
| TCONS_00044064 | 0         | 74.019444 up | Inf         | 3.30E-22 | 5.26E-22 |
| TCONS_00043193 | 0         | 73.934559 up | Inf         | 3.30E-22 | 5.26E-22 |
| TCONS_00064551 | 7.6344729 | 73.799148 up | 3.273003691 | 3.71E-17 | 4.95E-17 |
| TCONS_00078757 | 0         | 73.799148 up | Inf         | 3.30E-22 | 5.26E-22 |
| TCONS_00102591 | 0         | 73.757335 up | Inf         | 3.30E-22 | 5.26E-22 |
| TCONS_00102528 | 0         | 73.68473 up  | Inf         | 3.30E-22 | 5.26E-22 |
| TCONS_00089510 | 0         | 73.678165 up | Inf         | 3.30E-22 | 5.26E-22 |
| TCONS_00033061 | 0         | 73.653011 up | Inf         | 3.30E-22 | 5.26E-22 |
| TCONS_00043532 | 0         | 73.653011 up | Inf         | 3.30E-22 | 5.26E-22 |
| TCONS_00044138 | 0         | 73.653011 up | Inf         | 3.30E-22 | 5.26E-22 |
| TCONS_00054829 | 0         | 73.653011 up | Inf         | 3.30E-22 | 5.26E-22 |
| TCONS_00064643 | 0         | 73.653011 up | Inf         | 3.30E-22 | 5.26E-22 |
| TCONS_00072973 | 0         | 73.653011 up | Inf         | 3.30E-22 | 5.26E-22 |
| TCONS_00089033 | 0         | 73.653011 up | Inf         | 3.30E-22 | 5.26E-22 |
| TCONS_00096903 | 0         | 73.653011 up | Inf         | 3.30E-22 | 5.26E-22 |
| TCONS_00011851 | 0         | 73.596958 up | Inf         | 3.30E-22 | 5.26E-22 |
| TCONS_00012460 | 0         | 73.507451 up | Inf         | 3.30E-22 | 5.26E-22 |
| TCONS_00089543 | 0         | 73.471151 up | Inf         | 6.27E-22 | 9.82E-22 |
| TCONS_00081496 | 0         | 73.439152 up | Inf         | 6.27E-22 | 9.82E-22 |
| TCONS_00088970 | 0         | 73.410731 up | Inf         | 6.27E-22 | 9.82E-22 |
| TCONS_00089149 | 0         | 73.385321 up | Inf         | 6.27E-22 | 9.82E-22 |
| TCONS_00012575 | 0         | 73.290188 up | Inf         | 6.27E-22 | 9.82E-22 |
| TCONS_00043278 | 0         | 73.290188 up | Inf         | 6.27E-22 | 9.82E-22 |
| TCONS_00072804 | 0         | 73.290188 up | Inf         | 6.27E-22 | 9.82E-22 |
| TCONS_00089421 | 0         | 73.290188 up | Inf         | 6.27E-22 | 9.82E-22 |
| TCONS_00012812 | 0         | 73.262427 up | Inf         | 6.27E-22 | 9.82E-22 |
| TCONS_00064792 | 0         | 73.246186 up | Inf         | 6.27E-22 | 9.82E-22 |
| TCONS_00102593 | 0         | 73.238648 up | Inf         | 6.27E-22 | 9.82E-22 |
| TCONS_00081821 | 0         | 73.135785 up | Inf         | 6.27E-22 | 9.82E-22 |
| TCONS_00064577 | 0         | 73.126448 up | Inf         | 6.27E-22 | 9.82E-22 |
| TCONS_00012092 | 0         | 73.110114 up | Inf         | 6.27E-22 | 9.82E-22 |
| TCONS_00089556 | 4.7154097 | 72.930922 up | 3.951075596 | 1.26E-18 | 1.78E-18 |
| TCONS_00012166 | 0         | 72.930922 up | Inf         | 6.27E-22 | 9.82E-22 |
| TCONS_00018680 | 0         | 72.930922 up | Inf         | 6.27E-22 | 9.82E-22 |
| TCONS_00018998 | 0         | 72.930922 up | Inf         | 6.27E-22 | 9.82E-22 |
| TCONS_00025899 | 0         | 72.930922 up | Inf         | 6.27E-22 | 9.82E-22 |
| TCONS_00043640 | 0         | 72.930922 up | Inf         | 6.27E-22 | 9.82E-22 |
| TCONS_00055371 | 0         | 72.930922 up | Inf         | 6.27E-22 | 9.82E-22 |



|                |           |           |    |             |          |          |
|----------------|-----------|-----------|----|-------------|----------|----------|
| TCONS_00096717 | 0         | 72.930922 | up | Inf         | 6.27E-22 | 9.82E-22 |
| TCONS_00096739 | 0         | 72.930922 | up | Inf         | 6.27E-22 | 9.82E-22 |
| TCONS_00072901 | 0         | 72.83129  | up | Inf         | 6.27E-22 | 9.82E-22 |
| TCONS_00043088 | 0         | 72.727205 | up | Inf         | 6.27E-22 | 9.82E-22 |
| TCONS_00037535 | 3.6368378 | 72.655191 | up | 4.320309406 | 3.05E-19 | 4.36E-19 |
| TCONS_00012740 | 0         | 72.625772 | up | Inf         | 6.27E-22 | 9.82E-22 |
| TCONS_00032898 | 0         | 72.625772 | up | Inf         | 6.27E-22 | 9.82E-22 |
| TCONS_00032660 | 0         | 72.602405 | up | Inf         | 6.27E-22 | 9.82E-22 |
| TCONS_00018849 | 0         | 72.575162 | up | Inf         | 6.27E-22 | 9.82E-22 |
| TCONS_00032726 | 0         | 72.575162 | up | Inf         | 6.27E-22 | 9.82E-22 |
| TCONS_00044182 | 0         | 72.575162 | up | Inf         | 6.27E-22 | 9.82E-22 |
| TCONS_00080999 | 0         | 72.575162 | up | Inf         | 6.27E-22 | 9.82E-22 |
| TCONS_00081595 | 0         | 72.575162 | up | Inf         | 6.27E-22 | 9.82E-22 |
| TCONS_00081725 | 0         | 72.575162 | up | Inf         | 6.27E-22 | 9.82E-22 |
| TCONS_00089131 | 0         | 72.575162 | up | Inf         | 6.27E-22 | 9.82E-22 |
| TCONS_00096410 | 0         | 72.575162 | up | Inf         | 6.27E-22 | 9.82E-22 |
| TCONS_00081111 | 5.6254011 | 72.504426 | up | 3.688041191 | 5.01E-18 | 6.82E-18 |
| TCONS_00081576 | 0         | 72.39858  | up | Inf         | 1.19E-21 | 1.84E-21 |
| TCONS_00033066 | 0         | 72.293043 | up | Inf         | 1.19E-21 | 1.84E-21 |
| TCONS_00081592 | 0         | 72.259779 | up | Inf         | 1.19E-21 | 1.84E-21 |
| TCONS_00032688 | 0         | 72.245481 | up | Inf         | 1.19E-21 | 1.84E-21 |
| TCONS_00012243 | 0         | 72.222855 | up | Inf         | 1.19E-21 | 1.84E-21 |
| TCONS_00026158 | 0         | 72.222855 | up | Inf         | 1.19E-21 | 1.84E-21 |
| TCONS_00044235 | 0         | 72.222855 | up | Inf         | 1.19E-21 | 1.84E-21 |
| TCONS_00065031 | 0         | 72.222855 | up | Inf         | 1.19E-21 | 1.84E-21 |
| TCONS_00072624 | 0         | 72.222855 | up | Inf         | 1.19E-21 | 1.84E-21 |
| TCONS_00064341 | 0         | 72.181632 | up | Inf         | 1.19E-21 | 1.84E-21 |
| TCONS_00012619 | 0         | 72.135312 | up | Inf         | 1.19E-21 | 1.84E-21 |
| TCONS_00064524 | 0         | 72.023069 | up | Inf         | 1.19E-21 | 1.84E-21 |
| TCONS_00012750 | 0         | 71.909889 | up | Inf         | 1.19E-21 | 1.84E-21 |
| TCONS_00012131 | 0         | 71.873952 | up | Inf         | 1.19E-21 | 1.84E-21 |
| TCONS_00055470 | 0         | 71.873952 | up | Inf         | 1.19E-21 | 1.84E-21 |
| TCONS_00055628 | 0         | 71.873952 | up | Inf         | 1.19E-21 | 1.84E-21 |
| TCONS_00064217 | 0         | 71.873952 | up | Inf         | 1.19E-21 | 1.84E-21 |
| TCONS_00064272 | 0         | 71.873952 | up | Inf         | 1.19E-21 | 1.84E-21 |
| TCONS_00081525 | 0         | 71.873952 | up | Inf         | 1.19E-21 | 1.84E-21 |
| TCONS_00081831 | 0         | 71.873952 | up | Inf         | 1.19E-21 | 1.84E-21 |
| TCONS_00088933 | 0         | 71.873952 | up | Inf         | 1.19E-21 | 1.84E-21 |
| TCONS_00089675 | 0         | 71.873952 | up | Inf         | 1.19E-21 | 1.84E-21 |
| TCONS_00091143 | 0         | 71.804576 | up | Inf         | 1.19E-21 | 1.84E-21 |
| TCONS_00043823 | 0         | 71.648218 | up | Inf         | 1.19E-21 | 1.84E-21 |
| TCONS_00073097 | 0         | 71.648218 | up | Inf         | 1.19E-21 | 1.84E-21 |
| TCONS_00032912 | 3.699783  | 71.528405 | up | 4.273003691 | 5.76E-19 | 8.15E-19 |
| TCONS_00055657 | 0         | 71.528405 | up | Inf         | 1.19E-21 | 1.84E-21 |
| TCONS_00072671 | 0         | 71.528405 | up | Inf         | 1.19E-21 | 1.84E-21 |
| TCONS_00013078 | 0         | 71.447582 | up | Inf         | 2.26E-21 | 3.47E-21 |
| TCONS_00081214 | 0         | 71.283612 | up | Inf         | 2.26E-21 | 3.47E-21 |
| TCONS_00018618 | 0         | 71.186163 | up | Inf         | 2.26E-21 | 3.47E-21 |
| TCONS_00018942 | 0         | 71.186163 | up | Inf         | 2.26E-21 | 3.47E-21 |

|                |           |              |             |          |           |
|----------------|-----------|--------------|-------------|----------|-----------|
| TCONS_00044034 | 0         | 71.186163 up | Inf         | 2.26E-21 | 3.47E-21  |
| TCONS_00013098 | 61.029654 | 71.168241 up | 0.221723186 | 0.024543 | 0.0253332 |
| TCONS_00055251 | 0         | 70.992064 up | Inf         | 2.26E-21 | 3.47E-21  |
| TCONS_00025902 | 0         | 70.847182 up | Inf         | 2.26E-21 | 3.47E-21  |
| TCONS_00032685 | 0         | 70.847182 up | Inf         | 2.26E-21 | 3.47E-21  |
| TCONS_00054990 | 0         | 70.847182 up | Inf         | 2.26E-21 | 3.47E-21  |
| TCONS_00064863 | 0         | 70.759282 up | Inf         | 2.26E-21 | 3.47E-21  |
| TCONS_00102702 | 0         | 70.70289 up  | Inf         | 2.26E-21 | 3.47E-21  |
| TCONS_00013153 | 0         | 70.645338 up | Inf         | 2.26E-21 | 3.47E-21  |
| TCONS_00102680 | 0         | 70.511413 up | Inf         | 2.26E-21 | 3.47E-21  |
| TCONS_00013079 | 0         | 70.444641 up | Inf         | 4.29E-21 | 6.53E-21  |
| TCONS_00044062 | 0         | 70.444641 up | Inf         | 4.29E-21 | 6.53E-21  |
| TCONS_00064567 | 0         | 70.444641 up | Inf         | 4.29E-21 | 6.53E-21  |
| TCONS_00012278 | 0         | 70.409853 up | Inf         | 4.29E-21 | 6.53E-21  |
| TCONS_00055149 | 0         | 70.383117 up | Inf         | 4.29E-21 | 6.53E-21  |
| TCONS_00096919 | 0         | 70.311475 up | Inf         | 4.29E-21 | 6.53E-21  |
| TCONS_00018757 | 0         | 70.178812 up | Inf         | 4.29E-21 | 6.53E-21  |
| TCONS_00055226 | 0         | 70.178812 up | Inf         | 4.29E-21 | 6.53E-21  |
| TCONS_00043653 | 0         | 70.077104 up | Inf         | 4.29E-21 | 6.53E-21  |
| TCONS_00043853 | 0         | 70.023377 up | Inf         | 4.29E-21 | 6.53E-21  |
| TCONS_00067523 | 0         | 69.914982 up | Inf         | 4.29E-21 | 6.53E-21  |
| TCONS_00072970 | 0         | 69.914982 up | Inf         | 4.29E-21 | 6.53E-21  |
| TCONS_00064391 | 0         | 69.849334 up | Inf         | 4.29E-21 | 6.53E-21  |
| TCONS_00089040 | 0         | 69.849334 up | Inf         | 4.29E-21 | 6.53E-21  |
| TCONS_00019042 | 0         | 69.802518 up | Inf         | 4.29E-21 | 6.53E-21  |
| TCONS_00019009 | 6.0121474 | 69.740195 up | 3.536038097 | 3.32E-17 | 4.45E-17  |
| TCONS_00012732 | 0         | 69.653128 up | Inf         | 4.29E-21 | 6.53E-21  |
| TCONS_00055006 | 0         | 69.62304 up  | Inf         | 4.29E-21 | 6.53E-21  |
| TCONS_00012559 | 0         | 69.61588 up  | Inf         | 4.29E-21 | 6.53E-21  |
| TCONS_00011984 | 0         | 69.604249 up | Inf         | 4.29E-21 | 6.53E-21  |
| TCONS_00011937 | 1.9998827 | 69.595205 up | 5.121000598 | 1.05E-19 | 1.52E-19  |
| TCONS_00072929 | 11.986836 | 69.522935 up | 2.536038097 | 5.00E-14 | 6.23E-14  |
| TCONS_00043696 | 4.4950635 | 69.522935 up | 3.951075596 | 2.06E-18 | 2.86E-18  |
| TCONS_00018574 | 0         | 69.522935 up | Inf         | 4.29E-21 | 6.53E-21  |
| TCONS_00081159 | 0         | 69.522935 up | Inf         | 4.29E-21 | 6.53E-21  |
| TCONS_00054718 | 0         | 69.430238 up | Inf         | 8.15E-21 | 1.23E-20  |
| TCONS_00043489 | 0         | 69.376527 up | Inf         | 8.15E-21 | 1.23E-20  |
| TCONS_00064910 | 0         | 69.264005 up | Inf         | 8.15E-21 | 1.23E-20  |
| TCONS_00064558 | 0         | 69.21357 up  | Inf         | 8.15E-21 | 1.23E-20  |
| TCONS_00102714 | 0         | 69.199573 up | Inf         | 8.15E-21 | 1.23E-20  |
| TCONS_00012068 | 0         | 69.153624 up | Inf         | 8.15E-21 | 1.23E-20  |
| TCONS_00089214 | 29.248285 | 69.111904 up | 1.240582214 | 1.51E-07 | 1.69E-07  |
| TCONS_00054858 | 0         | 69.071069 up | Inf         | 8.15E-21 | 1.23E-20  |
| TCONS_00072369 | 0         | 69.039017 up | Inf         | 8.15E-21 | 1.23E-20  |
| TCONS_00012329 | 0         | 68.879204 up | Inf         | 8.15E-21 | 1.23E-20  |
| TCONS_00012741 | 0         | 68.879204 up | Inf         | 8.15E-21 | 1.23E-20  |
| TCONS_00043439 | 0         | 68.879204 up | Inf         | 8.15E-21 | 1.23E-20  |
| TCONS_00081376 | 11.107894 | 68.72013 up  | 2.629147502 | 2.99E-14 | 3.74E-14  |
| TCONS_00054971 | 0         | 68.654842 up | Inf         | 8.15E-21 | 1.23E-20  |

|                |           |           |    |             |          |          |
|----------------|-----------|-----------|----|-------------|----------|----------|
| TCONS_00089424 | 0         | 68.654842 | up | Inf         | 8.15E-21 | 1.23E-20 |
| TCONS_00043888 | 0         | 68.640868 | up | Inf         | 8.15E-21 | 1.23E-20 |
| TCONS_00055611 | 0         | 68.625038 | up | Inf         | 8.15E-21 | 1.23E-20 |
| TCONS_00064382 | 0         | 68.431937 | up | Inf         | 1.55E-20 | 2.32E-20 |
| TCONS_00018711 | 0         | 68.404175 | up | Inf         | 1.55E-20 | 2.32E-20 |
| TCONS_00102669 | 0         | 68.404175 | up | Inf         | 1.55E-20 | 2.32E-20 |
| TCONS_00019043 | 0         | 68.336849 | up | Inf         | 1.55E-20 | 2.32E-20 |
| TCONS_00072902 | 0         | 68.280255 | up | Inf         | 1.55E-20 | 2.32E-20 |
| TCONS_00102422 | 0         | 68.247285 | up | Inf         | 1.55E-20 | 2.32E-20 |
| TCONS_00072995 | 0         | 68.210474 | up | Inf         | 1.55E-20 | 2.32E-20 |
| TCONS_00064830 | 0         | 68.12229  | up | Inf         | 1.55E-20 | 2.32E-20 |
| TCONS_00055232 | 0         | 68.057257 | up | Inf         | 1.55E-20 | 2.32E-20 |
| TCONS_00102330 | 0         | 67.990441 | up | Inf         | 1.55E-20 | 2.32E-20 |
| TCONS_00064621 | 0         | 67.935654 | up | Inf         | 1.55E-20 | 2.32E-20 |
| TCONS_00064649 | 0         | 67.873669 | up | Inf         | 1.55E-20 | 2.32E-20 |
| TCONS_00043680 | 0         | 67.780903 | up | Inf         | 1.55E-20 | 2.32E-20 |
| TCONS_00012943 | 0         | 67.51526  | up | Inf         | 1.55E-20 | 2.32E-20 |
| TCONS_00043622 | 0         | 67.51526  | up | Inf         | 1.55E-20 | 2.32E-20 |
| TCONS_00054935 | 0         | 67.51526  | up | Inf         | 1.55E-20 | 2.32E-20 |
| TCONS_00055686 | 0         | 67.51526  | up | Inf         | 1.55E-20 | 2.32E-20 |
| TCONS_00089201 | 5.2279543 | 67.38183  | up | 3.688041191 | 5.66E-17 | 7.53E-17 |
| TCONS_00005721 | 0         | 67.38183  | up | Inf         | 2.94E-20 | 4.36E-20 |
| TCONS_00019126 | 0         | 67.38183  | up | Inf         | 2.94E-20 | 4.36E-20 |
| TCONS_00081593 | 0         | 67.199224 | up | Inf         | 2.94E-20 | 4.36E-20 |
| TCONS_00012952 | 0         | 67.182672 | up | Inf         | 2.94E-20 | 4.36E-20 |
| TCONS_00018739 | 0         | 67.182672 | up | Inf         | 2.94E-20 | 4.36E-20 |
| TCONS_00018774 | 0         | 67.182672 | up | Inf         | 2.94E-20 | 4.36E-20 |
| TCONS_00026069 | 0         | 67.182672 | up | Inf         | 2.94E-20 | 4.36E-20 |
| TCONS_00043220 | 0         | 67.182672 | up | Inf         | 2.94E-20 | 4.36E-20 |
| TCONS_00043899 | 0         | 67.182672 | up | Inf         | 2.94E-20 | 4.36E-20 |
| TCONS_00054396 | 0         | 67.182672 | up | Inf         | 2.94E-20 | 4.36E-20 |
| TCONS_00064402 | 0         | 67.182672 | up | Inf         | 2.94E-20 | 4.36E-20 |
| TCONS_00072888 | 0         | 67.182672 | up | Inf         | 2.94E-20 | 4.36E-20 |
| TCONS_00072979 | 0         | 67.182672 | up | Inf         | 2.94E-20 | 4.36E-20 |
| TCONS_00089188 | 0         | 67.182672 | up | Inf         | 2.94E-20 | 4.36E-20 |
| TCONS_00089691 | 0         | 67.182672 | up | Inf         | 2.94E-20 | 4.36E-20 |
| TCONS_00043945 | 0         | 67.162821 | up | Inf         | 2.94E-20 | 4.36E-20 |
| TCONS_00019062 | 14.875416 | 67.103967 | up | 2.173468018 | 6.67E-12 | 7.98E-12 |
| TCONS_00007202 | 0         | 67.017604 | up | Inf         | 2.94E-20 | 4.36E-20 |
| TCONS_00064693 | 0         | 66.911227 | up | Inf         | 2.94E-20 | 4.36E-20 |
| TCONS_00055390 | 0         | 66.878564 | up | Inf         | 2.94E-20 | 4.36E-20 |
| TCONS_00012229 | 0         | 66.853346 | up | Inf         | 2.94E-20 | 4.36E-20 |
| TCONS_00054780 | 0         | 66.853346 | up | Inf         | 2.94E-20 | 4.36E-20 |
| TCONS_00089503 | 0         | 66.853346 | up | Inf         | 2.94E-20 | 4.36E-20 |
| TCONS_00102451 | 0         | 66.853346 | up | Inf         | 2.94E-20 | 4.36E-20 |
| TCONS_00081782 | 0         | 66.836964 | up | Inf         | 2.94E-20 | 4.36E-20 |
| TCONS_00011998 | 0         | 66.717077 | up | Inf         | 2.94E-20 | 4.36E-20 |
| TCONS_00033019 | 33.752407 | 66.704072 | up | 0.982784456 | 6.57E-06 | 7.21E-06 |
| TCONS_00019165 | 0         | 66.527232 | up | Inf         | 2.94E-20 | 4.36E-20 |

|                |           |           |    |             |          |          |
|----------------|-----------|-----------|----|-------------|----------|----------|
| TCONS_00043445 | 0         | 66.527232 | up | Inf         | 2.94E-20 | 4.36E-20 |
| TCONS_00064448 | 0         | 66.527232 | up | Inf         | 2.94E-20 | 4.36E-20 |
| TCONS_00081378 | 0         | 66.527232 | up | Inf         | 2.94E-20 | 4.36E-20 |
| TCONS_00072418 | 0         | 66.504059 | up | Inf         | 2.94E-20 | 4.36E-20 |
| TCONS_00072541 | 0         | 66.504059 | up | Inf         | 2.94E-20 | 4.36E-20 |
| TCONS_00096849 | 0         | 66.419233 | up | Inf         | 5.59E-20 | 8.18E-20 |
| TCONS_00054507 | 2.7097002 | 66.356867 | up | 4.614040609 | 6.13E-18 | 8.32E-18 |
| TCONS_00055072 | 4.4125853 | 66.351527 | up | 3.910433612 | 2.62E-17 | 3.51E-17 |
| TCONS_00043715 | 0         | 66.345187 | up | Inf         | 5.59E-20 | 8.18E-20 |
| TCONS_00054454 | 0         | 66.345187 | up | Inf         | 5.59E-20 | 8.18E-20 |
| TCONS_00055402 | 0         | 66.328123 | up | Inf         | 5.59E-20 | 8.18E-20 |
| TCONS_00043270 | 0         | 66.222143 | up | Inf         | 5.59E-20 | 8.18E-20 |
| TCONS_00013180 | 0         | 66.204284 | up | Inf         | 5.59E-20 | 8.18E-20 |
| TCONS_00043304 | 0         | 66.204284 | up | Inf         | 5.59E-20 | 8.18E-20 |
| TCONS_00064829 | 0         | 66.204284 | up | Inf         | 5.59E-20 | 8.18E-20 |
| TCONS_00081718 | 0         | 66.204284 | up | Inf         | 5.59E-20 | 8.18E-20 |
| TCONS_00096485 | 0         | 66.204284 | up | Inf         | 5.59E-20 | 8.18E-20 |
| TCONS_00073127 | 0         | 66.175939 | up | Inf         | 5.59E-20 | 8.18E-20 |
| TCONS_00064284 | 0         | 66.072215 | up | Inf         | 5.59E-20 | 8.18E-20 |
| TCONS_00012481 | 0         | 66.056286 | up | Inf         | 5.59E-20 | 8.18E-20 |
| TCONS_00054853 | 0         | 66.056286 | up | Inf         | 5.59E-20 | 8.18E-20 |
| TCONS_00011933 | 0         | 65.998325 | up | Inf         | 5.59E-20 | 8.18E-20 |
| TCONS_00102691 | 0         | 65.904355 | up | Inf         | 5.59E-20 | 8.18E-20 |
| TCONS_00032803 | 0         | 65.884456 | up | Inf         | 5.59E-20 | 8.18E-20 |
| TCONS_00043604 | 0         | 65.884456 | up | Inf         | 5.59E-20 | 8.18E-20 |
| TCONS_00081051 | 0         | 65.884456 | up | Inf         | 5.59E-20 | 8.18E-20 |
| TCONS_00081375 | 0         | 65.884456 | up | Inf         | 5.59E-20 | 8.18E-20 |
| TCONS_00043983 | 0         | 65.865739 | up | Inf         | 5.59E-20 | 8.18E-20 |
| TCONS_00054598 | 0         | 65.831452 | up | Inf         | 5.59E-20 | 8.18E-20 |
| TCONS_00072827 | 0         | 65.831452 | up | Inf         | 5.59E-20 | 8.18E-20 |
| TCONS_00011731 | 0         | 65.795061 | up | Inf         | 5.59E-20 | 8.18E-20 |
| TCONS_00073136 | 0         | 65.748332 | up | Inf         | 5.59E-20 | 8.18E-20 |
| TCONS_00102632 | 0         | 65.748332 | up | Inf         | 5.59E-20 | 8.18E-20 |
| TCONS_00085105 | 8.990127  | 65.66055  | up | 2.868613436 | 1.82E-14 | 2.29E-14 |
| TCONS_00026060 | 0         | 65.567704 | up | Inf         | 5.59E-20 | 8.18E-20 |
| TCONS_00055703 | 0         | 65.567704 | up | Inf         | 5.59E-20 | 8.18E-20 |
| TCONS_00064889 | 0         | 65.567704 | up | Inf         | 5.59E-20 | 8.18E-20 |
| TCONS_00073000 | 0         | 65.567704 | up | Inf         | 5.59E-20 | 8.18E-20 |
| TCONS_00096478 | 0         | 65.567704 | up | Inf         | 5.59E-20 | 8.18E-20 |
| TCONS_00043427 | 0         | 65.462796 | up | Inf         | 1.06E-19 | 1.54E-19 |
| TCONS_00072521 | 0         | 65.445344 | up | Inf         | 1.06E-19 | 1.54E-19 |
| TCONS_00012617 | 0         | 65.253983 | up | Inf         | 1.06E-19 | 1.54E-19 |
| TCONS_00043390 | 0         | 65.253983 | up | Inf         | 1.06E-19 | 1.54E-19 |
| TCONS_00044052 | 0         | 65.253983 | up | Inf         | 1.06E-19 | 1.54E-19 |
| TCONS_00064366 | 0         | 65.253983 | up | Inf         | 1.06E-19 | 1.54E-19 |
| TCONS_00081363 | 0         | 65.253983 | up | Inf         | 1.06E-19 | 1.54E-19 |
| TCONS_00081589 | 0         | 65.253983 | up | Inf         | 1.06E-19 | 1.54E-19 |
| TCONS_00096799 | 0         | 65.253983 | up | Inf         | 1.06E-19 | 1.54E-19 |
| TCONS_00013088 | 0         | 65.116895 | up | Inf         | 1.06E-19 | 1.54E-19 |

|                |            |               |              |           |            |
|----------------|------------|---------------|--------------|-----------|------------|
| TCONS_00054552 | 41. 324546 | 65. 098246 up | 0. 655619713 | 0. 000347 | 0. 0003723 |
| TCONS_00081541 | 0          | 65. 098246 up | Inf          | 1. 06E-19 | 1. 54E-19  |
| TCONS_00064180 | 0          | 65. 040036 up | Inf          | 1. 06E-19 | 1. 54E-19  |
| TCONS_00012516 | 0          | 64. 94325 up  | Inf          | 1. 06E-19 | 1. 54E-19  |
| TCONS_00032947 | 0          | 64. 94325 up  | Inf          | 1. 06E-19 | 1. 54E-19  |
| TCONS_00043246 | 0          | 64. 94325 up  | Inf          | 1. 06E-19 | 1. 54E-19  |
| TCONS_00032829 | 8. 3890429 | 64. 8746 up   | 2. 951075596 | 1. 00E-14 | 1. 27E-14  |
| TCONS_00025795 | 0          | 64. 8746 up   | Inf          | 1. 06E-19 | 1. 54E-19  |
| TCONS_00089146 | 0          | 64. 749117 up | Inf          | 1. 06E-19 | 1. 54E-19  |
| TCONS_00064568 | 0          | 64. 716176 up | Inf          | 1. 06E-19 | 1. 54E-19  |
| TCONS_00018856 | 0          | 64. 635462 up | Inf          | 1. 06E-19 | 1. 54E-19  |
| TCONS_00043111 | 0          | 64. 635462 up | Inf          | 1. 06E-19 | 1. 54E-19  |
| TCONS_00096573 | 0          | 64. 635462 up | Inf          | 1. 06E-19 | 1. 54E-19  |
| TCONS_00043863 | 0          | 64. 538871 up | Inf          | 1. 06E-19 | 1. 54E-19  |
| TCONS_00078263 | 0          | 64. 455769 up | Inf          | 2. 02E-19 | 2. 90E-19  |
| TCONS_00033144 | 0          | 64. 440004 up | Inf          | 2. 02E-19 | 2. 90E-19  |
| TCONS_00064985 | 0          | 64. 406529 up | Inf          | 2. 02E-19 | 2. 90E-19  |
| TCONS_00088977 | 0          | 64. 406529 up | Inf          | 2. 02E-19 | 2. 90E-19  |
| TCONS_00011812 | 0          | 64. 330578 up | Inf          | 2. 02E-19 | 2. 90E-19  |
| TCONS_00043159 | 0          | 64. 330578 up | Inf          | 2. 02E-19 | 2. 90E-19  |
| TCONS_00081825 | 0          | 64. 306311 up | Inf          | 2. 02E-19 | 2. 90E-19  |
| TCONS_00044019 | 0          | 64. 259258 up | Inf          | 2. 02E-19 | 2. 90E-19  |
| TCONS_00043065 | 0          | 64. 214079 up | Inf          | 2. 02E-19 | 2. 90E-19  |
| TCONS_00033078 | 0          | 64. 050035 up | Inf          | 2. 02E-19 | 2. 90E-19  |
| TCONS_00044007 | 0          | 64. 028556 up | Inf          | 2. 02E-19 | 2. 90E-19  |
| TCONS_00064188 | 0          | 63. 991003 up | Inf          | 2. 02E-19 | 2. 90E-19  |
| TCONS_00054761 | 0          | 63. 979847 up | Inf          | 2. 02E-19 | 2. 90E-19  |
| TCONS_00055553 | 0          | 63. 97135 up  | Inf          | 2. 02E-19 | 2. 90E-19  |
| TCONS_00081070 | 0          | 63. 90854 up  | Inf          | 2. 02E-19 | 2. 90E-19  |
| TCONS_00026045 | 0          | 63. 853683 up | Inf          | 2. 02E-19 | 2. 90E-19  |
| TCONS_00054840 | 0          | 63. 785244 up | Inf          | 2. 02E-19 | 2. 90E-19  |
| TCONS_00018971 | 4. 4950635 | 63. 729357 up | 3. 825544714 | 9. 37E-17 | 1. 24E-16  |
| TCONS_00044026 | 0          | 63. 729357 up | Inf          | 2. 02E-19 | 2. 90E-19  |
| TCONS_00055306 | 0          | 63. 706458 up | Inf          | 2. 02E-19 | 2. 90E-19  |
| TCONS_00096639 | 0          | 63. 689675 up | Inf          | 2. 02E-19 | 2. 90E-19  |
| TCONS_00018949 | 0          | 63. 651765 up | Inf          | 2. 02E-19 | 2. 90E-19  |
| TCONS_00032699 | 0          | 63. 580804 up | Inf          | 2. 02E-19 | 2. 90E-19  |
| TCONS_00081101 | 0          | 63. 580804 up | Inf          | 2. 02E-19 | 2. 90E-19  |
| TCONS_00054803 | 0          | 63. 550059 up | Inf          | 2. 02E-19 | 2. 90E-19  |
| TCONS_00055409 | 0          | 63. 472304 up | Inf          | 3. 84E-19 | 5. 45E-19  |
| TCONS_00012936 | 0          | 63. 418193 up | Inf          | 3. 84E-19 | 5. 45E-19  |
| TCONS_00018571 | 0          | 63. 418193 up | Inf          | 3. 84E-19 | 5. 45E-19  |
| TCONS_00055538 | 0          | 63. 348757 up | Inf          | 3. 84E-19 | 5. 45E-19  |
| TCONS_00011915 | 0          | 63. 310248 up | Inf          | 3. 84E-19 | 5. 45E-19  |
| TCONS_00019084 | 0          | 63. 285766 up | Inf          | 3. 84E-19 | 5. 45E-19  |
| TCONS_00096568 | 0          | 63. 256412 up | Inf          | 3. 84E-19 | 5. 45E-19  |
| TCONS_00043607 | 0          | 63. 206799 up | Inf          | 3. 84E-19 | 5. 45E-19  |
| TCONS_00026129 | 0          | 63. 194998 up | Inf          | 3. 84E-19 | 5. 45E-19  |
| TCONS_00054395 | 0          | 63. 175831 up | Inf          | 3. 84E-19 | 5. 45E-19  |

|                |           |           |    |             |          |          |
|----------------|-----------|-----------|----|-------------|----------|----------|
| TCONS_00012818 | 0         | 63.149016 | up | Inf         | 3.84E-19 | 5.45E-19 |
| TCONS_00011925 | 0         | 63.139271 | up | Inf         | 3.84E-19 | 5.45E-19 |
| TCONS_00080984 | 0         | 63.139271 | up | Inf         | 3.84E-19 | 5.45E-19 |
| TCONS_00096950 | 0         | 63.139271 | up | Inf         | 3.84E-19 | 5.45E-19 |
| TCONS_00089676 | 0         | 63.1049   | up | Inf         | 3.84E-19 | 5.45E-19 |
| TCONS_00054519 | 0         | 63.075392 | up | Inf         | 3.84E-19 | 5.45E-19 |
| TCONS_00072932 | 0         | 63.041984 | up | Inf         | 3.84E-19 | 5.45E-19 |
| TCONS_00043416 | 0         | 62.975273 | up | Inf         | 3.84E-19 | 5.45E-19 |
| TCONS_00089316 | 0         | 62.935314 | up | Inf         | 3.84E-19 | 5.45E-19 |
| TCONS_00018975 | 0         | 62.738167 | up | Inf         | 3.84E-19 | 5.45E-19 |
| TCONS_00102490 | 0         | 62.587354 | up | Inf         | 3.84E-19 | 5.45E-19 |
| TCONS_00102305 | 6.9204575 | 62.437264 | up | 3.173468018 | 1.86E-14 | 2.33E-14 |
| TCONS_00096591 | 0         | 62.437264 | up | Inf         | 7.30E-19 | 1.03E-18 |
| TCONS_00025767 | 0         | 62.421779 | up | Inf         | 7.30E-19 | 1.03E-18 |
| TCONS_00102775 | 0         | 62.250662 | up | Inf         | 7.30E-19 | 1.03E-18 |
| TCONS_00102573 | 0         | 62.230633 | up | Inf         | 7.30E-19 | 1.03E-18 |
| TCONS_00043510 | 0         | 62.213475 | up | Inf         | 7.30E-19 | 1.03E-18 |
| TCONS_00064312 | 0         | 62.198613 | up | Inf         | 7.30E-19 | 1.03E-18 |
| TCONS_00025859 | 0         | 62.110728 | up | Inf         | 7.30E-19 | 1.03E-18 |
| TCONS_00043044 | 0         | 61.991284 | up | Inf         | 7.30E-19 | 1.03E-18 |
| TCONS_00064869 | 8.8483641 | 61.909824 | up | 2.806685687 | 2.12E-13 | 2.61E-13 |
| TCONS_00012469 | 0         | 61.785333 | up | Inf         | 7.30E-19 | 1.03E-18 |
| TCONS_00018822 | 0         | 61.734059 | up | Inf         | 7.30E-19 | 1.03E-18 |
| TCONS_00096660 | 0         | 61.697486 | up | Inf         | 7.30E-19 | 1.03E-18 |
| TCONS_00089571 | 0         | 61.68287  | up | Inf         | 7.30E-19 | 1.03E-18 |
| TCONS_00012020 | 0         | 61.377509 | up | Inf         | 1.39E-18 | 1.94E-18 |
| TCONS_00032969 | 0         | 61.377509 | up | Inf         | 1.39E-18 | 1.94E-18 |
| TCONS_00064487 | 0         | 61.377509 | up | Inf         | 1.39E-18 | 1.94E-18 |
| TCONS_00064546 | 0         | 61.377509 | up | Inf         | 1.39E-18 | 1.94E-18 |
| TCONS_00102486 | 0         | 61.377509 | up | Inf         | 1.39E-18 | 1.94E-18 |
| TCONS_00102817 | 0         | 61.377509 | up | Inf         | 1.39E-18 | 1.94E-18 |
| TCONS_00012366 | 0         | 61.270455 | up | Inf         | 1.39E-18 | 1.94E-18 |
| TCONS_00081022 | 0         | 61.118167 | up | Inf         | 1.39E-18 | 1.94E-18 |
| TCONS_00064808 | 0         | 61.09286  | up | Inf         | 1.39E-18 | 1.94E-18 |
| TCONS_00012839 | 0         | 61.075157 | up | Inf         | 1.39E-18 | 1.94E-18 |
| TCONS_00025948 | 0         | 61.075157 | up | Inf         | 1.39E-18 | 1.94E-18 |
| TCONS_00054837 | 0         | 61.075157 | up | Inf         | 1.39E-18 | 1.94E-18 |
| TCONS_00081243 | 0         | 61.075157 | up | Inf         | 1.39E-18 | 1.94E-18 |
| TCONS_00096746 | 0         | 61.075157 | up | Inf         | 1.39E-18 | 1.94E-18 |
| TCONS_00096781 | 0         | 61.075157 | up | Inf         | 1.39E-18 | 1.94E-18 |
| TCONS_00012548 | 0         | 61.027689 | up | Inf         | 1.39E-18 | 1.94E-18 |
| TCONS_00026023 | 0         | 60.975033 | up | Inf         | 1.39E-18 | 1.94E-18 |
| TCONS_00102673 | 0         | 60.975033 | up | Inf         | 1.39E-18 | 1.94E-18 |
| TCONS_00102635 | 4.7154097 | 60.775769 | up | 3.688041191 | 2.53E-15 | 3.23E-15 |
| TCONS_00012106 | 0         | 60.775769 | up | Inf         | 1.39E-18 | 1.94E-18 |
| TCONS_00013212 | 0         | 60.775769 | up | Inf         | 1.39E-18 | 1.94E-18 |
| TCONS_00026258 | 0         | 60.775769 | up | Inf         | 1.39E-18 | 1.94E-18 |
| TCONS_00064882 | 0         | 60.775769 | up | Inf         | 1.39E-18 | 1.94E-18 |
| TCONS_00072607 | 0         | 60.775769 | up | Inf         | 1.39E-18 | 1.94E-18 |

|                |           |           |    |             |          |           |
|----------------|-----------|-----------|----|-------------|----------|-----------|
| TCONS_00089617 | 0         | 60.664253 | up | Inf         | 1.39E-18 | 1.94E-18  |
| TCONS_00096856 | 0         | 60.592984 | up | Inf         | 1.39E-18 | 1.94E-18  |
| TCONS_00089130 | 0         | 60.577802 | up | Inf         | 1.39E-18 | 1.94E-18  |
| TCONS_00012592 | 0         | 60.479301 | up | Inf         | 2.64E-18 | 3.62E-18  |
| TCONS_00012821 | 0         | 60.479301 | up | Inf         | 2.64E-18 | 3.62E-18  |
| TCONS_00019125 | 0         | 60.479301 | up | Inf         | 2.64E-18 | 3.62E-18  |
| TCONS_00025850 | 0         | 60.479301 | up | Inf         | 2.64E-18 | 3.62E-18  |
| TCONS_00026108 | 0         | 60.479301 | up | Inf         | 2.64E-18 | 3.62E-18  |
| TCONS_00032872 | 0         | 60.479301 | up | Inf         | 2.64E-18 | 3.62E-18  |
| TCONS_00054884 | 0         | 60.479301 | up | Inf         | 2.64E-18 | 3.62E-18  |
| TCONS_00055598 | 0         | 60.479301 | up | Inf         | 2.64E-18 | 3.62E-18  |
| TCONS_00064267 | 0         | 60.479301 | up | Inf         | 2.64E-18 | 3.62E-18  |
| TCONS_00064465 | 0         | 60.479301 | up | Inf         | 2.64E-18 | 3.62E-18  |
| TCONS_00073157 | 0         | 60.479301 | up | Inf         | 2.64E-18 | 3.62E-18  |
| TCONS_00081523 | 0         | 60.479301 | up | Inf         | 2.64E-18 | 3.62E-18  |
| TCONS_00102774 | 0         | 60.479301 | up | Inf         | 2.64E-18 | 3.62E-18  |
| TCONS_00023494 | 4.6847902 | 60.381121 | up | 3.688041191 | 4.76E-15 | 6.05E-15  |
| TCONS_00012527 | 21.281938 | 60.345498 | up | 1.50361662  | 5.36E-08 | 6.02E-08  |
| TCONS_00012290 | 0         | 60.185713 | up | Inf         | 2.64E-18 | 3.62E-18  |
| TCONS_00013126 | 0         | 60.185713 | up | Inf         | 2.64E-18 | 3.62E-18  |
| TCONS_00019053 | 0         | 60.185713 | up | Inf         | 2.64E-18 | 3.62E-18  |
| TCONS_00044088 | 0         | 60.185713 | up | Inf         | 2.64E-18 | 3.62E-18  |
| TCONS_00054518 | 0         | 60.185713 | up | Inf         | 2.64E-18 | 3.62E-18  |
| TCONS_00064622 | 0         | 60.185713 | up | Inf         | 2.64E-18 | 3.62E-18  |
| TCONS_00064784 | 0         | 60.185713 | up | Inf         | 2.64E-18 | 3.62E-18  |
| TCONS_00072641 | 0         | 60.185713 | up | Inf         | 2.64E-18 | 3.62E-18  |
| TCONS_00081671 | 0         | 60.185713 | up | Inf         | 2.64E-18 | 3.62E-18  |
| TCONS_00096436 | 0         | 60.185713 | up | Inf         | 2.64E-18 | 3.62E-18  |
| TCONS_00012844 | 0         | 60.164851 | up | Inf         | 2.64E-18 | 3.62E-18  |
| TCONS_00055294 | 0         | 59.947615 | up | Inf         | 2.64E-18 | 3.62E-18  |
| TCONS_00012047 | 0         | 59.89496  | up | Inf         | 2.64E-18 | 3.62E-18  |
| TCONS_00012270 | 0         | 59.89496  | up | Inf         | 2.64E-18 | 3.62E-18  |
| TCONS_00012563 | 0         | 59.89496  | up | Inf         | 2.64E-18 | 3.62E-18  |
| TCONS_00012728 | 0         | 59.89496  | up | Inf         | 2.64E-18 | 3.62E-18  |
| TCONS_00026145 | 0         | 59.89496  | up | Inf         | 2.64E-18 | 3.62E-18  |
| TCONS_00054575 | 0         | 59.89496  | up | Inf         | 2.64E-18 | 3.62E-18  |
| TCONS_00055196 | 0         | 59.89496  | up | Inf         | 2.64E-18 | 3.62E-18  |
| TCONS_00072445 | 0         | 59.89496  | up | Inf         | 2.64E-18 | 3.62E-18  |
| TCONS_00089643 | 0         | 59.89496  | up | Inf         | 2.64E-18 | 3.62E-18  |
| TCONS_00043750 | 0         | 59.853654 | up | Inf         | 2.64E-18 | 3.62E-18  |
| TCONS_00102641 | 0         | 59.853654 | up | Inf         | 2.64E-18 | 3.62E-18  |
| TCONS_00043342 | 0         | 59.750635 | up | Inf         | 2.64E-18 | 3.62E-18  |
| TCONS_00064411 | 0         | 59.750635 | up | Inf         | 2.64E-18 | 3.62E-18  |
| TCONS_00025821 | 5.4501053 | 59.708319 | up | 3.453575937 | 4.76E-15 | 6.05E-15  |
| TCONS_00096851 | 0         | 59.637185 | up | Inf         | 2.64E-18 | 3.62E-18  |
| TCONS_00081740 | 42.547505 | 59.607004 | up | 0.486407329 | 0.003745 | 0.0039549 |
| TCONS_00011791 | 0         | 59.607004 | up | Inf         | 2.64E-18 | 3.62E-18  |
| TCONS_00012056 | 0         | 59.607004 | up | Inf         | 2.64E-18 | 3.62E-18  |
| TCONS_00018865 | 0         | 59.607004 | up | Inf         | 2.64E-18 | 3.62E-18  |

|                |                          |              |           |           |
|----------------|--------------------------|--------------|-----------|-----------|
| TCONS_00026064 | 0 59. 607004 up          | Inf          | 2. 64E-18 | 3. 62E-18 |
| TCONS_00054500 | 0 59. 607004 up          | Inf          | 2. 64E-18 | 3. 62E-18 |
| TCONS_00064194 | 0 59. 607004 up          | Inf          | 2. 64E-18 | 3. 62E-18 |
| TCONS_00064250 | 0 59. 607004 up          | Inf          | 2. 64E-18 | 3. 62E-18 |
| TCONS_00064498 | 0 59. 607004 up          | Inf          | 2. 64E-18 | 3. 62E-18 |
| TCONS_00064700 | 0 59. 607004 up          | Inf          | 2. 64E-18 | 3. 62E-18 |
| TCONS_00102706 | 0 59. 607004 up          | Inf          | 2. 64E-18 | 3. 62E-18 |
| TCONS_00055394 | 0 59. 443697 up          | Inf          | 5. 02E-18 | 6. 82E-18 |
| TCONS_00096511 | 0 59. 443697 up          | Inf          | 5. 02E-18 | 6. 82E-18 |
| TCONS_00011800 | 0 59. 321803 up          | Inf          | 5. 02E-18 | 6. 82E-18 |
| TCONS_00019164 | 0 59. 321803 up          | Inf          | 5. 02E-18 | 6. 82E-18 |
| TCONS_00026144 | 0 59. 321803 up          | Inf          | 5. 02E-18 | 6. 82E-18 |
| TCONS_00054523 | 0 59. 321803 up          | Inf          | 5. 02E-18 | 6. 82E-18 |
| TCONS_00054824 | 0 59. 321803 up          | Inf          | 5. 02E-18 | 6. 82E-18 |
| TCONS_00064505 | 0 59. 296011 up          | Inf          | 5. 02E-18 | 6. 82E-18 |
| TCONS_00089106 | 0 59. 296011 up          | Inf          | 5. 02E-18 | 6. 82E-18 |
| TCONS_00018915 | 0 59. 215555 up          | Inf          | 5. 02E-18 | 6. 82E-18 |
| TCONS_00102627 | 0 59. 195921 up          | Inf          | 5. 02E-18 | 6. 82E-18 |
| TCONS_00012452 | 0 59. 039318 up          | Inf          | 5. 02E-18 | 6. 82E-18 |
| TCONS_00055262 | 0 59. 039318 up          | Inf          | 5. 02E-18 | 6. 82E-18 |
| TCONS_00055329 | 0 59. 039318 up          | Inf          | 5. 02E-18 | 6. 82E-18 |
| TCONS_00064395 | 0 59. 039318 up          | Inf          | 5. 02E-18 | 6. 82E-18 |
| TCONS_00089134 | 0 59. 039318 up          | Inf          | 5. 02E-18 | 6. 82E-18 |
| TCONS_00055539 | 0 58. 89172 up           | Inf          | 5. 02E-18 | 6. 82E-18 |
| TCONS_00064408 | 0 58. 805961 up          | Inf          | 5. 02E-18 | 6. 82E-18 |
| TCONS_00055286 | 0 58. 784838 up          | Inf          | 5. 02E-18 | 6. 82E-18 |
| TCONS_00064623 | 0 58. 759511 up          | Inf          | 5. 02E-18 | 6. 82E-18 |
| TCONS_00102419 | 0 58. 759511 up          | Inf          | 5. 02E-18 | 6. 82E-18 |
| TCONS_00089544 | 0 58. 710408 up          | Inf          | 5. 02E-18 | 6. 82E-18 |
| TCONS_00054656 | 0 58. 482343 up          | Inf          | 9. 54E-18 | 1. 29E-17 |
| TCONS_00012087 | 0 58. 377442 up          | Inf          | 9. 54E-18 | 1. 29E-17 |
| TCONS_00013075 | 0 58. 26857 up           | Inf          | 9. 54E-18 | 1. 29E-17 |
| TCONS_00055375 | 0 58. 246844 up          | Inf          | 9. 54E-18 | 1. 29E-17 |
| TCONS_00011854 | 0 58. 207778 up          | Inf          | 9. 54E-18 | 1. 29E-17 |
| TCONS_00081358 | 0 58. 207778 up          | Inf          | 9. 54E-18 | 1. 29E-17 |
| TCONS_00043329 | 0 57. 935779 up          | Inf          | 9. 54E-18 | 1. 29E-17 |
| TCONS_00072677 | 0 57. 911178 up          | Inf          | 9. 54E-18 | 1. 29E-17 |
| TCONS_00043633 | 0 57. 858532 up          | Inf          | 9. 54E-18 | 1. 29E-17 |
| TCONS_00072514 | 0 57. 788485 up          | Inf          | 9. 54E-18 | 1. 29E-17 |
| TCONS_00073092 | 0 57. 755855 up          | Inf          | 9. 54E-18 | 1. 29E-17 |
| TCONS_00096356 | 0 57. 745306 up          | Inf          | 9. 54E-18 | 1. 29E-17 |
| TCONS_00064388 | 0 57. 595814 up          | Inf          | 9. 54E-18 | 1. 29E-17 |
| TCONS_00089668 | 8. 1176674 57. 544652 up | 2. 825544714 | 7. 58E-13 | 9. 23E-13 |
| TCONS_00012867 | 0 57. 532514 up          | Inf          | 9. 54E-18 | 1. 29E-17 |
| TCONS_00043401 | 0 57. 443661 up          | Inf          | 1. 81E-17 | 2. 43E-17 |
| TCONS_00096429 | 0 57. 399337 up          | Inf          | 1. 81E-17 | 2. 43E-17 |
| TCONS_00011823 | 0 57. 302868 up          | Inf          | 1. 81E-17 | 2. 43E-17 |
| TCONS_00033090 | 0 57. 00348 up           | Inf          | 1. 81E-17 | 2. 43E-17 |
| TCONS_00055644 | 0 56. 872738 up          | Inf          | 1. 81E-17 | 2. 43E-17 |



|                |           |           |    |             |          |          |
|----------------|-----------|-----------|----|-------------|----------|----------|
| TCONS_00096904 | 0         | 56.768575 | up | Inf         | 1.81E-17 | 2.43E-17 |
| TCONS_00044156 | 0         | 56.752584 | up | Inf         | 1.81E-17 | 2.43E-17 |
| TCONS_00012090 | 0         | 56.737785 | up | Inf         | 1.81E-17 | 2.43E-17 |
| TCONS_00064159 | 0         | 56.641782 | up | Inf         | 1.81E-17 | 2.43E-17 |
| TCONS_00012241 | 0         | 56.613045 | up | Inf         | 1.81E-17 | 2.43E-17 |
| TCONS_00081689 | 0         | 56.613045 | up | Inf         | 1.81E-17 | 2.43E-17 |
| TCONS_00011907 | 0         | 56.438467 | up | Inf         | 3.45E-17 | 4.60E-17 |
| TCONS_00054503 | 0         | 56.355713 | up | Inf         | 3.45E-17 | 4.60E-17 |
| TCONS_00096845 | 0         | 56.355713 | up | Inf         | 3.45E-17 | 4.60E-17 |
| TCONS_00012902 | 0         | 56.221212 | up | Inf         | 3.45E-17 | 4.60E-17 |
| TCONS_00081236 | 0         | 55.931986 | up | Inf         | 3.45E-17 | 4.60E-17 |
| TCONS_00064680 | 0         | 55.752333 | up | Inf         | 3.45E-17 | 4.60E-17 |
| TCONS_00064334 | 0         | 55.653023 | up | Inf         | 3.45E-17 | 4.60E-17 |
| TCONS_00054869 | 0         | 55.633204 | up | Inf         | 3.45E-17 | 4.60E-17 |
| TCONS_00012054 | 0         | 55.597564 | up | Inf         | 3.45E-17 | 4.60E-17 |
| TCONS_00081267 | 0         | 55.597564 | up | Inf         | 3.45E-17 | 4.60E-17 |
| TCONS_00011824 | 0         | 55.486026 | up | Inf         | 6.57E-17 | 8.68E-17 |
| TCONS_00081072 | 0         | 55.455462 | up | Inf         | 6.57E-17 | 8.68E-17 |
| TCONS_00089276 | 0         | 55.349361 | up | Inf         | 6.57E-17 | 8.68E-17 |
| TCONS_00073051 | 0         | 55.214909 | up | Inf         | 6.57E-17 | 8.68E-17 |
| TCONS_00102606 | 0         | 55.197719 | up | Inf         | 6.57E-17 | 8.68E-17 |
| TCONS_00072619 | 0         | 55.031427 | up | Inf         | 6.57E-17 | 8.68E-17 |
| TCONS_00012026 | 0         | 54.981183 | up | Inf         | 6.57E-17 | 8.68E-17 |
| TCONS_00012638 | 0         | 54.967641 | up | Inf         | 6.57E-17 | 8.68E-17 |
| TCONS_00033010 | 0         | 54.967641 | up | Inf         | 6.57E-17 | 8.68E-17 |
| TCONS_00043447 | 0         | 54.967641 | up | Inf         | 6.57E-17 | 8.68E-17 |
| TCONS_00102446 | 0         | 54.967641 | up | Inf         | 6.57E-17 | 8.68E-17 |
| TCONS_00102679 | 0         | 54.956812 | up | Inf         | 6.57E-17 | 8.68E-17 |
| TCONS_00018929 | 9.1323758 | 54.928986 | up | 2.588505517 | 1.52E-11 | 1.80E-11 |
| TCONS_00102752 | 0         | 54.822224 | up | Inf         | 6.57E-17 | 8.68E-17 |
| TCONS_00043311 | 0         | 54.698192 | up | Inf         | 6.57E-17 | 8.68E-17 |
| TCONS_00043471 | 0         | 54.698192 | up | Inf         | 6.57E-17 | 8.68E-17 |
| TCONS_00043474 | 0         | 54.698192 | up | Inf         | 6.57E-17 | 8.68E-17 |
| TCONS_00081025 | 0         | 54.698192 | up | Inf         | 6.57E-17 | 8.68E-17 |
| TCONS_00018669 | 0         | 54.636386 | up | Inf         | 6.57E-17 | 8.68E-17 |
| TCONS_00043137 | 0         | 54.617871 | up | Inf         | 6.57E-17 | 8.68E-17 |
| TCONS_00096749 | 0         | 54.583521 | up | Inf         | 6.57E-17 | 8.68E-17 |
| TCONS_00012856 | 0         | 54.497832 | up | Inf         | 1.25E-16 | 1.64E-16 |
| TCONS_00032662 | 0         | 54.431371 | up | Inf         | 1.25E-16 | 1.64E-16 |
| TCONS_00096648 | 0         | 54.431371 | up | Inf         | 1.25E-16 | 1.64E-16 |
| TCONS_00033032 | 2.2164599 | 54.278083 | up | 4.614040609 | 2.98E-15 | 3.81E-15 |
| TCONS_00064170 | 0         | 54.119375 | up | Inf         | 1.25E-16 | 1.64E-16 |
| TCONS_00026315 | 0         | 54.073394 | up | Inf         | 1.25E-16 | 1.64E-16 |
| TCONS_00012863 | 0         | 54.035986 | up | Inf         | 1.25E-16 | 1.64E-16 |
| TCONS_00013144 | 0         | 53.905464 | up | Inf         | 1.25E-16 | 1.64E-16 |
| TCONS_00054721 | 0         | 53.905464 | up | Inf         | 1.25E-16 | 1.64E-16 |
| TCONS_00064638 | 0         | 53.905464 | up | Inf         | 1.25E-16 | 1.64E-16 |
| TCONS_00072949 | 0         | 53.905464 | up | Inf         | 1.25E-16 | 1.64E-16 |
| TCONS_00081645 | 0         | 53.672107 | up | Inf         | 1.25E-16 | 1.64E-16 |

|                |           |              |             |          |          |
|----------------|-----------|--------------|-------------|----------|----------|
| TCONS_00019110 | 0         | 53.646303 up | Inf         | 1.25E-16 | 1.64E-16 |
| TCONS_00044118 | 0         | 53.646303 up | Inf         | 1.25E-16 | 1.64E-16 |
| TCONS_00072399 | 0         | 53.646303 up | Inf         | 1.25E-16 | 1.64E-16 |
| TCONS_00088995 | 0         | 53.646303 up | Inf         | 1.25E-16 | 1.64E-16 |
| TCONS_00096678 | 0         | 53.646303 up | Inf         | 1.25E-16 | 1.64E-16 |
| TCONS_00032648 | 0         | 53.482676 up | Inf         | 2.38E-16 | 3.11E-16 |
| TCONS_00054669 | 0         | 53.389623 up | Inf         | 2.38E-16 | 3.11E-16 |
| TCONS_00089427 | 0         | 53.341337 up | Inf         | 2.38E-16 | 3.11E-16 |
| TCONS_00089487 | 0         | 53.287637 up | Inf         | 2.38E-16 | 3.11E-16 |
| TCONS_00055101 | 0         | 53.193841 up | Inf         | 2.38E-16 | 3.11E-16 |
| TCONS_00043703 | 0         | 53.182871 up | Inf         | 2.38E-16 | 3.11E-16 |
| TCONS_00012978 | 0         | 53.135386 up | Inf         | 2.38E-16 | 3.11E-16 |
| TCONS_00096417 | 0         | 53.066469 up | Inf         | 2.38E-16 | 3.11E-16 |
| TCONS_00054434 | 0         | 52.967236 up | Inf         | 2.38E-16 | 3.11E-16 |
| TCONS_00102590 | 0         | 52.88356 up  | Inf         | 2.38E-16 | 3.11E-16 |
| TCONS_00055600 | 0         | 52.534986 up | Inf         | 2.38E-16 | 3.11E-16 |
| TCONS_00072752 | 0         | 52.387001 up | Inf         | 4.53E-16 | 5.88E-16 |
| TCONS_00102567 | 0         | 52.387001 up | Inf         | 4.53E-16 | 5.88E-16 |
| TCONS_00089396 | 0         | 52.239846 up | Inf         | 4.53E-16 | 5.88E-16 |
| TCONS_00089256 | 0         | 52.170883 up | Inf         | 4.53E-16 | 5.88E-16 |
| TCONS_00043709 | 0         | 52.142202 up | Inf         | 4.53E-16 | 5.88E-16 |
| TCONS_00064747 | 0         | 52.142202 up | Inf         | 4.53E-16 | 5.88E-16 |
| TCONS_00089052 | 0         | 52.116566 up | Inf         | 4.53E-16 | 5.88E-16 |
| TCONS_00064708 | 0         | 51.89968 up  | Inf         | 4.53E-16 | 5.88E-16 |
| TCONS_00089649 | 0         | 51.89968 up  | Inf         | 4.53E-16 | 5.88E-16 |
| TCONS_00012730 | 4.0080983 | 51.659403 up | 3.688041191 | 1.93E-13 | 2.38E-13 |
| TCONS_00011729 | 0         | 51.525223 up | Inf         | 4.53E-16 | 5.88E-16 |
| TCONS_00055619 | 0         | 51.445049 up | Inf         | 8.63E-16 | 1.11E-15 |
| TCONS_00055580 | 0         | 51.021633 up | Inf         | 8.63E-16 | 1.11E-15 |
| TCONS_00080987 | 0         | 50.995401 up | Inf         | 8.63E-16 | 1.11E-15 |
| TCONS_00043752 | 0         | 50.95174 up  | Inf         | 8.63E-16 | 1.11E-15 |
| TCONS_00081380 | 0         | 50.95174 up  | Inf         | 8.63E-16 | 1.11E-15 |
| TCONS_00054947 | 0         | 50.720141 up | Inf         | 8.63E-16 | 1.11E-15 |
| TCONS_00043164 | 0         | 50.60513 up  | Inf         | 8.63E-16 | 1.11E-15 |
| TCONS_00012782 | 0         | 50.536373 up | Inf         | 8.63E-16 | 1.11E-15 |
| TCONS_00044082 | 0         | 50.525811 up | Inf         | 8.63E-16 | 1.11E-15 |
| TCONS_00011938 | 0         | 50.511417 up | Inf         | 8.63E-16 | 1.11E-15 |
| TCONS_00102670 | 0         | 50.490639 up | Inf         | 1.64E-15 | 2.10E-15 |
| TCONS_00081660 | 0         | 50.289341 up | Inf         | 1.64E-15 | 2.10E-15 |
| TCONS_00043566 | 0         | 50.263203 up | Inf         | 1.64E-15 | 2.10E-15 |
| TCONS_00018917 | 0         | 50.211009 up | Inf         | 1.64E-15 | 2.10E-15 |
| TCONS_00055163 | 3.8945085 | 50.195372 up | 3.688041191 | 6.88E-13 | 8.37E-13 |
| TCONS_00089423 | 0         | 50.18342 up  | Inf         | 1.64E-15 | 2.10E-15 |
| TCONS_00012107 | 0         | 50.140009 up | Inf         | 1.64E-15 | 2.10E-15 |
| TCONS_00088945 | 0         | 49.925866 up | Inf         | 1.64E-15 | 2.10E-15 |
| TCONS_00064573 | 0         | 49.865018 up | Inf         | 1.64E-15 | 2.10E-15 |
| TCONS_00012411 | 0         | 49.814425 up | Inf         | 1.64E-15 | 2.10E-15 |
| TCONS_00064716 | 0         | 49.746092 up | Inf         | 1.64E-15 | 2.10E-15 |
| TCONS_00044079 | 0         | 49.725629 up | Inf         | 1.64E-15 | 2.10E-15 |

|                |           |              |             |          |          |
|----------------|-----------|--------------|-------------|----------|----------|
| TCONS_00096839 | 0         | 49.703479 up | Inf         | 1.64E-15 | 2.10E-15 |
| TCONS_00054544 | 0         | 49.469354 up | Inf         | 3.13E-15 | 3.99E-15 |
| TCONS_00054871 | 0         | 49.440901 up | Inf         | 3.13E-15 | 3.99E-15 |
| TCONS_00012850 | 0         | 49.413342 up | Inf         | 3.13E-15 | 3.99E-15 |
| TCONS_00043974 | 0         | 49.38509 up  | Inf         | 3.13E-15 | 3.99E-15 |
| TCONS_00072393 | 0         | 49.38509 up  | Inf         | 3.13E-15 | 3.99E-15 |
| TCONS_00089506 | 8.5127751 | 49.373589 up | 2.536038097 | 5.68E-10 | 6.58E-10 |
| TCONS_00102561 | 0         | 49.373589 up | Inf         | 3.13E-15 | 3.99E-15 |
| TCONS_00043073 | 0         | 49.311249 up | Inf         | 3.13E-15 | 3.99E-15 |
| TCONS_00089477 | 0         | 49.156084 up | Inf         | 3.13E-15 | 3.99E-15 |
| TCONS_00013070 | 0         | 49.004968 up | Inf         | 3.13E-15 | 3.99E-15 |
| TCONS_00011832 | 0         | 48.860125 up | Inf         | 3.13E-15 | 3.99E-15 |
| TCONS_00043993 | 0         | 48.740076 up | Inf         | 3.13E-15 | 3.99E-15 |
| TCONS_00012479 | 0         | 48.620615 up | Inf         | 3.13E-15 | 3.99E-15 |
| TCONS_00081715 | 0         | 48.620615 up | Inf         | 3.13E-15 | 3.99E-15 |
| TCONS_00032907 | 0         | 48.514918 up | Inf         | 3.13E-15 | 3.99E-15 |
| TCONS_00089050 | 12.533467 | 48.462242 up | 1.951075596 | 5.16E-08 | 5.79E-08 |
| TCONS_00081335 | 0         | 48.14857 up  | Inf         | 5.96E-15 | 7.55E-15 |
| TCONS_00072412 | 0         | 48.055259 up | Inf         | 5.96E-15 | 7.55E-15 |
| TCONS_00012762 | 0         | 47.915968 up | Inf         | 5.96E-15 | 7.55E-15 |
| TCONS_00033194 | 0         | 47.915968 up | Inf         | 5.96E-15 | 7.55E-15 |
| TCONS_00072550 | 0         | 47.915968 up | Inf         | 5.96E-15 | 7.55E-15 |
| TCONS_00043553 | 0         | 47.902356 up | Inf         | 5.96E-15 | 7.55E-15 |
| TCONS_00096878 | 0         | 47.890262 up | Inf         | 5.96E-15 | 7.55E-15 |
| TCONS_00055011 | 0         | 47.808188 up | Inf         | 5.96E-15 | 7.55E-15 |
| TCONS_00026116 | 0         | 47.800508 up | Inf         | 5.96E-15 | 7.55E-15 |
| TCONS_00072903 | 0         | 47.800508 up | Inf         | 5.96E-15 | 7.55E-15 |
| TCONS_00013027 | 0         | 47.685603 up | Inf         | 5.96E-15 | 7.55E-15 |
| TCONS_00043185 | 0         | 47.685603 up | Inf         | 5.96E-15 | 7.55E-15 |
| TCONS_00054476 | 0         | 47.685603 up | Inf         | 5.96E-15 | 7.55E-15 |
| TCONS_00064676 | 0         | 47.685603 up | Inf         | 5.96E-15 | 7.55E-15 |
| TCONS_00088993 | 0         | 47.577961 up | Inf         | 5.96E-15 | 7.55E-15 |
| TCONS_00030109 | 0         | 47.563645 up | Inf         | 5.96E-15 | 7.55E-15 |
| TCONS_00081183 | 4.6026009 | 47.457442 up | 3.366113096 | 1.73E-11 | 2.06E-11 |
| TCONS_00055108 | 0         | 47.457442 up | Inf         | 1.14E-14 | 1.43E-14 |
| TCONS_00054406 | 0         | 47.321591 up | Inf         | 1.14E-14 | 1.43E-14 |
| TCONS_00043287 | 0         | 47.252884 up | Inf         | 1.14E-14 | 1.43E-14 |
| TCONS_00081071 | 7.3244436 | 47.201485 up | 2.688041191 | 2.02E-10 | 2.36E-10 |
| TCONS_00012401 | 0         | 47.081988 up | Inf         | 1.14E-14 | 1.43E-14 |
| TCONS_00055419 | 0         | 47.081988 up | Inf         | 1.14E-14 | 1.43E-14 |
| TCONS_00102302 | 3.8400942 | 47.019337 up | 3.614040609 | 4.62E-12 | 5.54E-12 |
| TCONS_00025947 | 0         | 46.89648 up  | Inf         | 1.14E-14 | 1.43E-14 |
| TCONS_00032863 | 0         | 46.884164 up | Inf         | 1.14E-14 | 1.43E-14 |
| TCONS_00064491 | 0         | 46.866263 up | Inf         | 1.14E-14 | 1.43E-14 |
| TCONS_00012571 | 0         | 46.785875 up | Inf         | 1.14E-14 | 1.43E-14 |
| TCONS_00055633 | 0         | 46.785875 up | Inf         | 1.14E-14 | 1.43E-14 |
| TCONS_00012717 | 0         | 46.660106 up | Inf         | 1.14E-14 | 1.43E-14 |
| TCONS_00074078 | 0         | 46.660106 up | Inf         | 1.14E-14 | 1.43E-14 |
| TCONS_00025978 | 0         | 46.566223 up | Inf         | 1.14E-14 | 1.43E-14 |

|                |           |           |    |             |          |           |
|----------------|-----------|-----------|----|-------------|----------|-----------|
| TCONS_00072480 | 0         | 46.566223 | up | Inf         | 1.14E-14 | 1.43E-14  |
| TCONS_00065002 | 0         | 46.546357 | up | Inf         | 1.14E-14 | 1.43E-14  |
| TCONS_00043520 | 0         | 46.448801 | up | Inf         | 2.16E-14 | 2.71E-14  |
| TCONS_00081437 | 0         | 46.442982 | up | Inf         | 2.16E-14 | 2.71E-14  |
| TCONS_00012860 | 0         | 46.348624 | up | Inf         | 2.16E-14 | 2.71E-14  |
| TCONS_00043900 | 0         | 46.300544 | up | Inf         | 2.16E-14 | 2.71E-14  |
| TCONS_00025879 | 0         | 46.182618 | up | Inf         | 2.16E-14 | 2.71E-14  |
| TCONS_00026314 | 0         | 46.133049 | up | Inf         | 2.16E-14 | 2.71E-14  |
| TCONS_00096574 | 0         | 46.133049 | up | Inf         | 2.16E-14 | 2.71E-14  |
| TCONS_00000811 | 3.562754  | 45.91947  | up | 3.688041191 | 8.71E-12 | 1.04E-11  |
| TCONS_00055055 | 0         | 45.91947  | up | Inf         | 2.16E-14 | 2.71E-14  |
| TCONS_00013136 | 0         | 45.765377 | up | Inf         | 2.16E-14 | 2.71E-14  |
| TCONS_00018959 | 3.5496073 | 45.750025 | up | 3.688041191 | 8.71E-12 | 1.04E-11  |
| TCONS_00032901 | 0         | 45.602784 | up | Inf         | 2.16E-14 | 2.71E-14  |
| TCONS_00033165 | 0         | 45.460275 | up | Inf         | 4.13E-14 | 5.14E-14  |
| TCONS_00032642 | 0         | 45.301323 | up | Inf         | 4.13E-14 | 5.14E-14  |
| TCONS_00089212 | 10.798244 | 45.232181 | up | 2.066552814 | 4.52E-08 | 5.08E-08  |
| TCONS_00011734 | 0         | 45.221605 | up | Inf         | 4.13E-14 | 5.14E-14  |
| TCONS_00025882 | 0         | 45.175835 | up | Inf         | 4.13E-14 | 5.14E-14  |
| TCONS_00102399 | 0         | 45.021603 | up | Inf         | 4.13E-14 | 5.14E-14  |
| TCONS_00018896 | 0         | 44.993674 | up | Inf         | 4.13E-14 | 5.14E-14  |
| TCONS_00032944 | 0         | 44.75905  | up | Inf         | 4.13E-14 | 5.14E-14  |
| TCONS_00012431 | 3.1539134 | 44.715025 | up | 3.825544714 | 4.13E-12 | 4.96E-12  |
| TCONS_00032797 | 25.704556 | 44.598046 | up | 0.794956395 | 0.001049 | 0.0011169 |
| TCONS_00011759 | 0         | 44.544635 | up | Inf         | 4.13E-14 | 5.14E-14  |
| TCONS_00054464 | 0         | 44.544635 | up | Inf         | 4.13E-14 | 5.14E-14  |
| TCONS_00036889 | 27.19781  | 44.279489 | up | 0.703148083 | 0.002381 | 0.0025251 |
| TCONS_00055332 | 0         | 44.279489 | up | Inf         | 7.87E-14 | 9.74E-14  |
| TCONS_00072895 | 0         | 44.279489 | up | Inf         | 7.87E-14 | 9.74E-14  |
| TCONS_00072946 | 0         | 44.279489 | up | Inf         | 7.87E-14 | 9.74E-14  |
| TCONS_00072971 | 0         | 44.279489 | up | Inf         | 7.87E-14 | 9.74E-14  |
| TCONS_00096415 | 0         | 44.279489 | up | Inf         | 7.87E-14 | 9.74E-14  |
| TCONS_00055609 | 0         | 44.136189 | up | Inf         | 7.87E-14 | 9.74E-14  |
| TCONS_00011804 | 0         | 43.993814 | up | Inf         | 7.87E-14 | 9.74E-14  |
| TCONS_00043562 | 0         | 43.930831 | up | Inf         | 7.87E-14 | 9.74E-14  |
| TCONS_00089583 | 2.4230317 | 43.721812 | up | 4.173468018 | 1.84E-12 | 2.22E-12  |
| TCONS_00081407 | 0         | 43.655834 | up | Inf         | 7.87E-14 | 9.74E-14  |
| TCONS_00072906 | 0         | 43.502655 | up | Inf         | 7.87E-14 | 9.74E-14  |
| TCONS_00088919 | 0         | 43.375826 | up | Inf         | 1.50E-13 | 1.85E-13  |
| TCONS_00018731 | 0         | 43.368388 | up | Inf         | 1.50E-13 | 1.85E-13  |
| TCONS_00089760 | 3.3634391 | 43.350548 | up | 3.688041191 | 1.48E-11 | 1.76E-11  |
| TCONS_00089194 | 5.1717397 | 43.327242 | up | 3.066552814 | 2.14E-10 | 2.49E-10  |
| TCONS_00025996 | 0         | 43.327242 | up | Inf         | 1.50E-13 | 1.85E-13  |
| TCONS_00064860 | 0         | 43.312688 | up | Inf         | 1.50E-13 | 1.85E-13  |
| TCONS_00064557 | 1.5979129 | 43.249733 | up | 4.758430519 | 3.49E-12 | 4.21E-12  |
| TCONS_00043244 | 20.110319 | 43.199501 | up | 1.10307869  | 0.000111 | 0.0001193 |
| TCONS_00072890 | 0         | 43.178009 | up | Inf         | 1.50E-13 | 1.85E-13  |
| TCONS_00055052 | 0         | 43.124372 | up | Inf         | 1.50E-13 | 1.85E-13  |
| TCONS_00026120 | 0         | 43.010544 | up | Inf         | 1.50E-13 | 1.85E-13  |

|                |           |           |    |             |          |           |
|----------------|-----------|-----------|----|-------------|----------|-----------|
| TCONS_00043102 | 0         | 42.964256 | up | Inf         | 1.50E-13 | 1.85E-13  |
| TCONS_00012808 | 0         | 42.937686 | up | Inf         | 1.50E-13 | 1.85E-13  |
| TCONS_00032633 | 0         | 42.900543 | up | Inf         | 1.50E-13 | 1.85E-13  |
| TCONS_00088994 | 0         | 42.858172 | up | Inf         | 1.50E-13 | 1.85E-13  |
| TCONS_00013167 | 0         | 42.75261  | up | Inf         | 1.50E-13 | 1.85E-13  |
| TCONS_00054993 | 0         | 42.654553 | up | Inf         | 1.50E-13 | 1.85E-13  |
| TCONS_00072822 | 0         | 42.543038 | up | Inf         | 1.50E-13 | 1.85E-13  |
| TCONS_00054740 | 0         | 42.508309 | up | Inf         | 1.50E-13 | 1.85E-13  |
| TCONS_00088950 | 0         | 42.415089 | up | Inf         | 2.86E-13 | 3.50E-13  |
| TCONS_00012348 | 2.1912155 | 42.363064 | up | 4.273003691 | 6.64E-12 | 7.96E-12  |
| TCONS_00081325 | 0         | 42.346987 | up | Inf         | 2.86E-13 | 3.50E-13  |
| TCONS_00026098 | 0         | 42.303763 | up | Inf         | 2.86E-13 | 3.50E-13  |
| TCONS_00018678 | 0         | 42.266785 | up | Inf         | 2.86E-13 | 3.50E-13  |
| TCONS_00055168 | 0         | 42.248319 | up | Inf         | 2.86E-13 | 3.50E-13  |
| TCONS_00054749 | 0         | 42.092847 | up | Inf         | 2.86E-13 | 3.50E-13  |
| TCONS_00096778 | 0         | 42.092847 | up | Inf         | 2.86E-13 | 3.50E-13  |
| TCONS_00064129 | 0         | 41.926472 | up | Inf         | 2.86E-13 | 3.50E-13  |
| TCONS_00064710 | 0         | 41.926472 | up | Inf         | 2.86E-13 | 3.50E-13  |
| TCONS_00102376 | 0         | 41.886003 | up | Inf         | 2.86E-13 | 3.50E-13  |
| TCONS_00081756 | 0         | 41.744972 | up | Inf         | 2.86E-13 | 3.50E-13  |
| TCONS_00043225 | 0         | 41.724903 | up | Inf         | 2.86E-13 | 3.50E-13  |
| TCONS_00012534 | 0         | 41.587444 | up | Inf         | 2.86E-13 | 3.50E-13  |
| TCONS_00012319 | 0         | 41.525262 | up | Inf         | 2.86E-13 | 3.50E-13  |
| TCONS_00012625 | 22.903419 | 41.327523 | up | 0.851539923 | 0.001276 | 0.0013583 |
| TCONS_00096463 | 0         | 41.221826 | up | Inf         | 5.46E-13 | 6.66E-13  |
| TCONS_00019502 | 1.7715352 | 41.099194 | up | 4.536038097 | 1.26E-11 | 1.50E-11  |
| TCONS_00072878 | 0         | 40.985973 | up | Inf         | 5.46E-13 | 6.66E-13  |
| TCONS_00019135 | 11.343674 | 40.93764  | up | 1.851539923 | 4.40E-07 | 4.90E-07  |
| TCONS_00012676 | 0         | 40.783739 | up | Inf         | 5.46E-13 | 6.66E-13  |
| TCONS_00032669 | 0         | 40.710694 | up | Inf         | 5.46E-13 | 6.66E-13  |
| TCONS_00032853 | 0         | 40.694497 | up | Inf         | 5.46E-13 | 6.66E-13  |
| TCONS_00081564 | 0         | 40.650022 | up | Inf         | 5.46E-13 | 6.66E-13  |
| TCONS_00096535 | 0         | 40.650022 | up | Inf         | 5.46E-13 | 6.66E-13  |
| TCONS_00025794 | 0         | 40.349356 | up | Inf         | 1.04E-12 | 1.27E-12  |
| TCONS_00012235 | 0         | 40.138241 | up | Inf         | 1.04E-12 | 1.27E-12  |
| TCONS_00096475 | 0         | 39.994377 | up | Inf         | 1.04E-12 | 1.27E-12  |
| TCONS_00095954 | 1.9316136 | 39.833757 | up | 4.366113096 | 2.40E-11 | 2.85E-11  |
| TCONS_00043452 | 0         | 39.698852 | up | Inf         | 1.04E-12 | 1.27E-12  |
| TCONS_00096891 | 10.260732 | 39.674422 | up | 1.951075596 | 3.10E-07 | 3.46E-07  |
| TCONS_00012623 | 0         | 39.53886  | up | Inf         | 1.04E-12 | 1.27E-12  |
| TCONS_00055414 | 0         | 39.484894 | up | Inf         | 1.99E-12 | 2.40E-12  |
| TCONS_00032913 | 0         | 39.429085 | up | Inf         | 1.99E-12 | 2.40E-12  |
| TCONS_00012277 | 0         | 39.317939 | up | Inf         | 1.99E-12 | 2.40E-12  |
| TCONS_00055383 | 0         | 39.211354 | up | Inf         | 1.99E-12 | 2.40E-12  |
| TCONS_00044152 | 0         | 39.189892 | up | Inf         | 1.99E-12 | 2.40E-12  |
| TCONS_00019014 | 0         | 38.918295 | up | Inf         | 1.99E-12 | 2.40E-12  |
| TCONS_00072533 | 0         | 38.896492 | up | Inf         | 1.99E-12 | 2.40E-12  |
| TCONS_00055359 | 0         | 38.887521 | up | Inf         | 1.99E-12 | 2.40E-12  |
| TCONS_00043969 | 0         | 38.879551 | up | Inf         | 1.99E-12 | 2.40E-12  |

|                |           |           |    |             |          |          |
|----------------|-----------|-----------|----|-------------|----------|----------|
| TCONS_00102368 | 0         | 38.744553 | up | Inf         | 1.99E-12 | 2.40E-12 |
| TCONS_00032718 | 0         | 38.65164  | up | Inf         | 1.99E-12 | 2.40E-12 |
| TCONS_00054535 | 0         | 38.444207 | up | Inf         | 3.80E-12 | 4.57E-12 |
| TCONS_00102420 | 0         | 38.417134 | up | Inf         | 3.80E-12 | 4.57E-12 |
| TCONS_00064367 | 0         | 38.345124 | up | Inf         | 3.80E-12 | 4.57E-12 |
| TCONS_00096710 | 0         | 38.266225 | up | Inf         | 3.80E-12 | 4.57E-12 |
| TCONS_00043276 | 0         | 38.148482 | up | Inf         | 3.80E-12 | 4.57E-12 |
| TCONS_00096709 | 4.2190508 | 38.064824 | up | 3.173468018 | 1.38E-09 | 1.59E-09 |
| TCONS_00064397 | 0         | 38.050916 | up | Inf         | 3.80E-12 | 4.57E-12 |
| TCONS_00043734 | 0         | 37.929658 | up | Inf         | 3.80E-12 | 4.57E-12 |
| TCONS_00012478 | 2.9327548 | 37.799563 | up | 3.688041191 | 3.62E-10 | 4.20E-10 |
| TCONS_00033113 | 0         | 37.799563 | up | Inf         | 3.80E-12 | 4.57E-12 |
| TCONS_00096572 | 0         | 37.66559  | up | Inf         | 3.80E-12 | 4.57E-12 |
| TCONS_00055016 | 0         | 37.483102 | up | Inf         | 7.26E-12 | 8.67E-12 |
| TCONS_00044142 | 3.2279986 | 37.4444   | up | 3.536038097 | 6.86E-10 | 7.92E-10 |
| TCONS_00025922 | 0         | 37.344147 | up | Inf         | 7.26E-12 | 8.67E-12 |
| TCONS_00096588 | 0         | 37.232002 | up | Inf         | 7.26E-12 | 8.67E-12 |
| TCONS_00054708 | 0         | 37.19477  | up | Inf         | 7.26E-12 | 8.67E-12 |
| TCONS_00081442 | 0         | 37.0712   | up | Inf         | 7.26E-12 | 8.67E-12 |
| TCONS_00059568 | 0         | 36.899574 | up | Inf         | 7.26E-12 | 8.67E-12 |
| TCONS_00043210 | 0         | 36.859682 | up | Inf         | 7.26E-12 | 8.67E-12 |
| TCONS_00064527 | 0         | 36.847966 | up | Inf         | 7.26E-12 | 8.67E-12 |
| TCONS_00102806 | 0         | 36.826505 | up | Inf         | 7.26E-12 | 8.67E-12 |
| TCONS_00072698 | 0         | 36.774491 | up | Inf         | 7.26E-12 | 8.67E-12 |
| TCONS_00043146 | 0         | 36.69266  | up | Inf         | 7.26E-12 | 8.67E-12 |
| TCONS_00012693 | 0         | 36.563224 | up | Inf         | 7.26E-12 | 8.67E-12 |
| TCONS_00055228 | 0         | 36.312886 | up | Inf         | 1.39E-11 | 1.65E-11 |
| TCONS_00012853 | 0         | 36.111428 | up | Inf         | 1.39E-11 | 1.65E-11 |
| TCONS_00055259 | 0         | 36.067656 | up | Inf         | 1.39E-11 | 1.65E-11 |
| TCONS_00081075 | 4.294391  | 35.977084 | up | 3.066552814 | 4.89E-09 | 5.57E-09 |
| TCONS_00096522 | 0         | 35.833112 | up | Inf         | 1.39E-11 | 1.65E-11 |
| TCONS_00012473 | 0         | 35.764202 | up | Inf         | 1.39E-11 | 1.65E-11 |
| TCONS_00089315 | 0         | 35.579986 | up | Inf         | 1.39E-11 | 1.65E-11 |
| TCONS_00064756 | 4.5806838 | 35.423591 | up | 2.951075596 | 3.16E-08 | 3.56E-08 |
| TCONS_00072431 | 0         | 35.423591 | up | Inf         | 2.65E-11 | 3.14E-11 |
| TCONS_00054641 | 0         | 35.255707 | up | Inf         | 2.65E-11 | 3.14E-11 |
| TCONS_00018922 | 0         | 35.22232  | up | Inf         | 2.65E-11 | 3.14E-11 |
| TCONS_00096473 | 14.702195 | 35.191559 | up | 1.259197892 | 0.000222 | 0.000238 |
| TCONS_00064507 | 0         | 35.038552 | up | Inf         | 2.65E-11 | 3.14E-11 |
| TCONS_00064286 | 0         | 34.854537 | up | Inf         | 2.65E-11 | 3.14E-11 |
| TCONS_00043126 | 0         | 34.81152  | up | Inf         | 2.65E-11 | 3.14E-11 |
| TCONS_00054630 | 0         | 34.761468 | up | Inf         | 2.65E-11 | 3.14E-11 |
| TCONS_00089148 | 0         | 34.632002 | up | Inf         | 2.65E-11 | 3.14E-11 |
| TCONS_00011864 | 0         | 34.439602 | up | Inf         | 5.08E-11 | 5.98E-11 |
| TCONS_00072643 | 1.1589682 | 34.356615 | up | 4.889675052 | 2.55E-10 | 2.96E-10 |
| TCONS_00013159 | 3.3170469 | 34.202088 | up | 3.366113096 | 4.66E-09 | 5.31E-09 |
| TCONS_00043163 | 0         | 34.123643 | up | Inf         | 5.08E-11 | 5.98E-11 |
| TCONS_00089551 | 0         | 34.123643 | up | Inf         | 5.08E-11 | 5.98E-11 |
| TCONS_00081487 | 0         | 34.010181 | up | Inf         | 5.08E-11 | 5.98E-11 |

|                |           |           |    |             |          |           |
|----------------|-----------|-----------|----|-------------|----------|-----------|
| TCONS_00102643 | 0         | 33.901483 | up | Inf         | 5.08E-11 | 5.98E-11  |
| TCONS_00026007 | 0         | 33.813428 | up | Inf         | 5.08E-11 | 5.98E-11  |
| TCONS_00089008 | 0         | 33.813428 | up | Inf         | 5.08E-11 | 5.98E-11  |
| TCONS_00073123 | 0         | 33.690915 | up | Inf         | 5.08E-11 | 5.98E-11  |
| TCONS_00018708 | 0         | 33.638681 | up | Inf         | 5.08E-11 | 5.98E-11  |
| TCONS_00042979 | 0         | 33.508802 | up | Inf         | 5.08E-11 | 5.98E-11  |
| TCONS_00012772 | 0         | 33.418482 | up | Inf         | 9.71E-11 | 1.14E-10  |
| TCONS_00081050 | 0         | 33.395978 | up | Inf         | 9.71E-11 | 1.14E-10  |
| TCONS_00064426 | 0         | 33.328647 | up | Inf         | 9.71E-11 | 1.14E-10  |
| TCONS_00081332 | 0         | 33.209616 | up | Inf         | 9.71E-11 | 1.14E-10  |
| TCONS_00089552 | 0         | 33.209616 | up | Inf         | 9.71E-11 | 1.14E-10  |
| TCONS_00026195 | 0         | 33.062018 | up | Inf         | 9.71E-11 | 1.14E-10  |
| TCONS_00054561 | 3.6575802 | 32.999163 | up | 3.173468018 | 3.24E-08 | 3.66E-08  |
| TCONS_00007792 | 12.024295 | 32.93287  | up | 1.453575937 | 7.69E-05 | 8.33E-05  |
| TCONS_00043217 | 0         | 32.799621 | up | Inf         | 9.71E-11 | 1.14E-10  |
| TCONS_00018758 | 0         | 32.626992 | up | Inf         | 9.71E-11 | 1.14E-10  |
| TCONS_00043188 | 0         | 32.626992 | up | Inf         | 9.71E-11 | 1.14E-10  |
| TCONS_00012211 | 0         | 32.45617  | up | Inf         | 1.86E-10 | 2.17E-10  |
| TCONS_00089663 | 0         | 32.343279 | up | Inf         | 1.86E-10 | 2.17E-10  |
| TCONS_00054926 | 0         | 32.287127 | up | Inf         | 1.86E-10 | 2.17E-10  |
| TCONS_00018581 | 0         | 32.27312  | up | Inf         | 1.86E-10 | 2.17E-10  |
| TCONS_00081458 | 0         | 32.203264 | up | Inf         | 1.86E-10 | 2.17E-10  |
| TCONS_00096883 | 0         | 32.143629 | up | Inf         | 1.86E-10 | 2.17E-10  |
| TCONS_00021981 | 12.460409 | 32.119836 | up | 1.366113096 | 0.000129 | 0.0001389 |
| TCONS_00102730 | 0         | 31.926842 | up | Inf         | 1.86E-10 | 2.17E-10  |
| TCONS_00064876 | 0         | 31.655124 | up | Inf         | 1.86E-10 | 2.17E-10  |
| TCONS_00032711 | 0         | 31.642883 | up | Inf         | 1.86E-10 | 2.17E-10  |
| TCONS_00089302 | 0         | 31.559199 | up | Inf         | 1.86E-10 | 2.17E-10  |
| TCONS_00072661 | 0         | 31.308729 | up | Inf         | 3.56E-10 | 4.13E-10  |
| TCONS_00102533 | 0         | 31.168802 | up | Inf         | 3.56E-10 | 4.13E-10  |
| TCONS_00018956 | 0         | 30.85539  | up | Inf         | 3.56E-10 | 4.13E-10  |
| TCONS_00043576 | 0         | 30.775815 | up | Inf         | 3.56E-10 | 4.13E-10  |
| TCONS_00081315 | 0         | 30.61298  | up | Inf         | 3.56E-10 | 4.13E-10  |
| TCONS_00043691 | 0         | 30.321824 | up | Inf         | 6.82E-10 | 7.88E-10  |
| TCONS_00089679 | 0         | 30.296492 | up | Inf         | 6.82E-10 | 7.88E-10  |
| TCONS_00018796 | 0         | 30.239651 | up | Inf         | 6.82E-10 | 7.88E-10  |
| TCONS_00072508 | 0         | 30.157922 | up | Inf         | 6.82E-10 | 7.88E-10  |
| TCONS_00081235 | 0         | 30.092856 | up | Inf         | 6.82E-10 | 7.88E-10  |
| TCONS_00072672 | 0         | 29.995783 | up | Inf         | 6.82E-10 | 7.88E-10  |
| TCONS_00025876 | 0         | 29.965575 | up | Inf         | 6.82E-10 | 7.88E-10  |
| TCONS_00096351 | 0         | 29.823985 | up | Inf         | 6.82E-10 | 7.88E-10  |
| TCONS_00102616 | 0         | 29.732031 | up | Inf         | 6.82E-10 | 7.88E-10  |
| TCONS_00026016 | 0         | 29.637267 | up | Inf         | 6.82E-10 | 7.88E-10  |
| TCONS_00019031 | 0         | 29.597961 | up | Inf         | 6.82E-10 | 7.88E-10  |
| TCONS_00089220 | 0         | 29.519659 | up | Inf         | 6.82E-10 | 7.88E-10  |
| TCONS_00012145 | 0         | 29.320202 | up | Inf         | 1.31E-09 | 1.50E-09  |
| TCONS_00012707 | 0         | 29.3103   | up | Inf         | 1.31E-09 | 1.50E-09  |
| TCONS_00026105 | 0         | 29.241172 | up | Inf         | 1.31E-09 | 1.50E-09  |
| TCONS_00081439 | 0         | 29.241172 | up | Inf         | 1.31E-09 | 1.50E-09  |

|                |           |              |             |          |          |
|----------------|-----------|--------------|-------------|----------|----------|
| TCONS_00102341 | 0         | 28.982938 up | Inf         | 1.31E-09 | 1.50E-09 |
| TCONS_00043349 | 0         | 28.96789 up  | Inf         | 1.31E-09 | 1.50E-09 |
| TCONS_00064719 | 0         | 28.96789 up  | Inf         | 1.31E-09 | 1.50E-09 |
| TCONS_00012279 | 0         | 28.877927 up | Inf         | 1.31E-09 | 1.50E-09 |
| TCONS_00025924 | 0         | 28.833155 up | Inf         | 1.31E-09 | 1.50E-09 |
| TCONS_00032678 | 0         | 28.611362 up | Inf         | 1.31E-09 | 1.50E-09 |
| TCONS_00018607 | 0         | 28.420073 up | Inf         | 2.51E-09 | 2.87E-09 |
| TCONS_00064121 | 0         | 28.392955 up | Inf         | 2.51E-09 | 2.87E-09 |
| TCONS_00013133 | 0         | 28.101217 up | Inf         | 2.51E-09 | 2.87E-09 |
| TCONS_00081554 | 0         | 28.050355 up | Inf         | 2.51E-09 | 2.87E-09 |
| TCONS_00033022 | 0         | 27.924002 up | Inf         | 2.51E-09 | 2.87E-09 |
| TCONS_00012465 | 0         | 27.551682 up | Inf         | 2.51E-09 | 2.87E-09 |
| TCONS_00012155 | 0         | 27.174261 up | Inf         | 4.81E-09 | 5.48E-09 |
| TCONS_00102613 | 0         | 27.149467 up | Inf         | 4.81E-09 | 5.48E-09 |
| TCONS_00043806 | 0         | 26.952732 up | Inf         | 4.81E-09 | 5.48E-09 |
| TCONS_00081543 | 0         | 26.894266 up | Inf         | 4.81E-09 | 5.48E-09 |
| TCONS_00043942 | 0         | 26.662918 up | Inf         | 4.81E-09 | 5.48E-09 |
| TCONS_00081087 | 0         | 26.631101 up | Inf         | 4.81E-09 | 5.48E-09 |
| TCONS_00012256 | 4.1285133 | 26.605701 up | 2.688041191 | 1.40E-06 | 1.55E-06 |
| TCONS_00064552 | 0         | 26.54873 up  | Inf         | 4.81E-09 | 5.48E-09 |
| TCONS_00072563 | 0         | 26.336166 up | Inf         | 9.24E-09 | 1.05E-08 |
| TCONS_00089183 | 0         | 26.299333 up | Inf         | 9.24E-09 | 1.05E-08 |
| TCONS_00011884 | 0         | 25.927913 up | Inf         | 9.24E-09 | 1.05E-08 |
| TCONS_00032630 | 0         | 25.770049 up | Inf         | 9.24E-09 | 1.05E-08 |
| TCONS_00054576 | 0         | 25.616233 up | Inf         | 9.24E-09 | 1.05E-08 |
| TCONS_00043887 | 2.8292458 | 25.525823 up | 3.173468018 | 7.64E-07 | 8.49E-07 |
| TCONS_00032970 | 0         | 25.47587 up  | Inf         | 1.78E-08 | 2.01E-08 |
| TCONS_00064503 | 0         | 25.450967 up | Inf         | 1.78E-08 | 2.01E-08 |
| TCONS_00102807 | 2.7801838 | 25.083179 up | 3.173468018 | 1.44E-06 | 1.60E-06 |
| TCONS_00043321 | 0         | 24.867564 up | Inf         | 1.78E-08 | 2.01E-08 |
| TCONS_00064748 | 0         | 24.697723 up | Inf         | 1.78E-08 | 2.01E-08 |
| TCONS_00013117 | 0         | 24.644853 up | Inf         | 1.78E-08 | 2.01E-08 |
| TCONS_00081094 | 0         | 24.430063 up | Inf         | 3.41E-08 | 3.84E-08 |
| TCONS_00012687 | 0         | 24.310307 up | Inf         | 3.41E-08 | 3.84E-08 |
| TCONS_00054916 | 0         | 24.310307 up | Inf         | 3.41E-08 | 3.84E-08 |
| TCONS_00064268 | 0         | 24.310307 up | Inf         | 3.41E-08 | 3.84E-08 |
| TCONS_00018827 | 0         | 23.996626 up | Inf         | 3.41E-08 | 3.84E-08 |
| TCONS_00072772 | 0         | 23.908484 up | Inf         | 3.41E-08 | 3.84E-08 |
| TCONS_00072745 | 0         | 23.842802 up | Inf         | 3.41E-08 | 3.84E-08 |
| TCONS_00012429 | 0         | 23.728721 up | Inf         | 3.41E-08 | 3.84E-08 |
| TCONS_00018857 | 0         | 23.615727 up | Inf         | 3.41E-08 | 3.84E-08 |
| TCONS_00089125 | 0         | 23.590763 up | Inf         | 3.41E-08 | 3.84E-08 |
| TCONS_00089673 | 0         | 23.503804 up | Inf         | 3.41E-08 | 3.84E-08 |
| TCONS_00072682 | 0         | 23.481547 up | Inf         | 6.57E-08 | 7.37E-08 |
| TCONS_00102394 | 0         | 23.392937 up | Inf         | 6.57E-08 | 7.37E-08 |
| TCONS_00026174 | 0         | 23.283111 up | Inf         | 6.57E-08 | 7.37E-08 |
| TCONS_00081792 | 0         | 23.143413 up | Inf         | 6.57E-08 | 7.37E-08 |
| TCONS_00012123 | 3.9586156 | 22.959735 up | 2.536038097 | 1.68E-05 | 1.84E-05 |
| TCONS_00043023 | 0         | 22.790913 up | Inf         | 6.57E-08 | 7.37E-08 |



|                |           |           |    |             |          |           |
|----------------|-----------|-----------|----|-------------|----------|-----------|
| TCONS_00026077 | 0         | 22.379525 | up | Inf         | 1.27E-07 | 1.42E-07  |
| TCONS_00026126 | 0         | 22.139744 | up | Inf         | 1.27E-07 | 1.42E-07  |
| TCONS_00054531 | 5.6584917 | 21.879277 | up | 1.951075596 | 0.000236 | 0.0002532 |
| TCONS_00064328 | 0         | 21.599751 | up | Inf         | 1.27E-07 | 1.42E-07  |
| TCONS_00043551 | 0         | 21.437908 | up | Inf         | 2.44E-07 | 2.72E-07  |
| TCONS_00022103 | 2.7642057 | 21.376305 | up | 2.951075596 | 1.82E-05 | 1.99E-05  |
| TCONS_00102587 | 0         | 21.133392 | up | Inf         | 2.44E-07 | 2.72E-07  |
| TCONS_00043531 | 0         | 21.103416 | up | Inf         | 2.44E-07 | 2.72E-07  |
| TCONS_00013051 | 0         | 20.912722 | up | Inf         | 2.44E-07 | 2.72E-07  |
| TCONS_00012158 | 0         | 20.45917  | up | Inf         | 4.71E-07 | 5.24E-07  |
| TCONS_00081809 | 0         | 20.25859  | up | Inf         | 4.71E-07 | 5.24E-07  |
| TCONS_00013077 | 0         | 19.997188 | up | Inf         | 4.71E-07 | 5.24E-07  |
| TCONS_00081435 | 0         | 19.805522 | up | Inf         | 4.71E-07 | 5.24E-07  |
| TCONS_00037629 | 0         | 19.372276 | up | Inf         | 9.09E-07 | 1.01E-06  |
| TCONS_00012852 | 0         | 19.133112 | up | Inf         | 9.09E-07 | 1.01E-06  |
| TCONS_00055017 | 0         | 19.133112 | up | Inf         | 9.09E-07 | 1.01E-06  |
| TCONS_00081461 | 0         | 19.00116  | up | Inf         | 9.09E-07 | 1.01E-06  |
| TCONS_00054760 | 0         | 18.856664 | up | Inf         | 9.09E-07 | 1.01E-06  |
| TCONS_00000714 | 0         | 18.785238 | up | Inf         | 9.09E-07 | 1.01E-06  |
| TCONS_00089061 | 1.6139993 | 18.7222   | up | 3.536038097 | 1.84E-05 | 2.00E-05  |
| TCONS_00043373 | 0         | 18.643995 | up | Inf         | 9.09E-07 | 1.01E-06  |
| TCONS_00043353 | 0         | 18.449787 | up | Inf         | 1.76E-06 | 1.94E-06  |
| TCONS_00015940 | 2.8292458 | 18.232731 | up | 2.688041191 | 0.000121 | 0.0001307 |
| TCONS_00043340 | 0         | 17.90362  | up | Inf         | 1.76E-06 | 1.94E-06  |
| TCONS_00043077 | 0         | 17.882101 | up | Inf         | 1.76E-06 | 1.94E-06  |
| TCONS_00043180 | 0         | 17.820903 | up | Inf         | 1.76E-06 | 1.94E-06  |
| TCONS_00017018 | 4.6026009 | 17.796541 | up | 1.951075596 | 0.000958 | 0.0010204 |
| TCONS_00096621 | 0         | 17.51716  | up | Inf         | 1.76E-06 | 1.94E-06  |
| TCONS_00025875 | 0         | 17.462334 | up | Inf         | 3.40E-06 | 3.75E-06  |
| TCONS_00033026 | 0         | 17.462334 | up | Inf         | 3.40E-06 | 3.75E-06  |
| TCONS_00008015 | 3.8554853 | 17.392344 | up | 2.173468018 | 0.000664 | 0.0007084 |
| TCONS_00043282 | 0         | 17.267767 | up | Inf         | 3.40E-06 | 3.75E-06  |
| TCONS_00013057 | 0         | 17.061821 | up | Inf         | 3.40E-06 | 3.75E-06  |
| TCONS_00064776 | 4.3924365 | 16.983913 | up | 1.951075596 | 0.000664 | 0.0007084 |
| TCONS_00012711 | 0         | 16.983913 | up | Inf         | 3.40E-06 | 3.75E-06  |
| TCONS_00044008 | 0         | 16.937509 | up | Inf         | 3.40E-06 | 3.75E-06  |
| TCONS_00096853 | 0         | 16.937509 | up | Inf         | 3.40E-06 | 3.75E-06  |
| TCONS_00064980 | 0         | 16.754401 | up | Inf         | 3.40E-06 | 3.75E-06  |
| TCONS_00072481 | 0         | 16.679269 | up | Inf         | 3.40E-06 | 3.75E-06  |
| TCONS_00072538 | 0         | 16.385361 | up | Inf         | 6.6E-06  | 7.22E-06  |
| TCONS_00043975 | 0         | 16.313496 | up | Inf         | 6.60E-06 | 7.22E-06  |
| TCONS_00032795 | 0         | 16.242258 | up | Inf         | 6.60E-06 | 7.22E-06  |
| TCONS_00012276 | 0         | 16.143564 | up | Inf         | 6.60E-06 | 7.22E-06  |
| TCONS_00008549 | 0         | 16.101632 | up | Inf         | 6.60E-06 | 7.22E-06  |
| TCONS_00043156 | 0         | 16.101632 | up | Inf         | 6.60E-06 | 7.22E-06  |
| TCONS_00055092 | 0         | 16.032229 | up | Inf         | 6.60E-06 | 7.22E-06  |
| TCONS_00064340 | 0         | 15.895201 | up | Inf         | 6.60E-06 | 7.22E-06  |
| TCONS_00032707 | 0         | 15.760496 | up | Inf         | 6.60E-06 | 7.22E-06  |
| TCONS_00089139 | 0         | 15.743818 | up | Inf         | 6.60E-06 | 7.22E-06  |

|                |           |           |    |             |          |           |
|----------------|-----------|-----------|----|-------------|----------|-----------|
| TCONS_00096844 | 0         | 15.693996 | up | Inf         | 6.60E-06 | 7.22E-06  |
| TCONS_00102496 | 0         | 15.644488 | up | Inf         | 6.60E-06 | 7.22E-06  |
| TCONS_00081383 | 0         | 15.628055 | up | Inf         | 6.60E-06 | 7.22E-06  |
| TCONS_00033128 | 0         | 15.553369 | up | Inf         | 6.60E-06 | 7.22E-06  |
| TCONS_00064870 | 0         | 15.382453 | up | Inf         | 1.28E-05 | 1.40E-05  |
| TCONS_00055202 | 0         | 15.36974  | up | Inf         | 1.28E-05 | 1.40E-05  |
| TCONS_00043173 | 0         | 15.243758 | up | Inf         | 1.28E-05 | 1.40E-05  |
| TCONS_00064834 | 0         | 14.892801 | up | Inf         | 1.28E-05 | 1.40E-05  |
| TCONS_00043836 | 0         | 14.803889 | up | Inf         | 1.28E-05 | 1.40E-05  |
| TCONS_00011822 | 6.8710256 | 14.75983  | up | 1.10307869  | 0.022738 | 0.0235756 |
| TCONS_00019074 | 0         | 14.472673 | up | Inf         | 2.5E-05  | 2.72E-05  |
| TCONS_00089174 | 0         | 14.440565 | up | Inf         | 2.5E-05  | 2.72E-05  |
| TCONS_00054813 | 3.7140679 | 14.360915 | up | 1.951075596 | 0.003972 | 0.0041937 |
| TCONS_00072793 | 0         | 13.814214 | up | Inf         | 2.5E-05  | 2.72E-05  |
| TCONS_00055178 | 0         | 13.367393 | up | Inf         | 4.87E-05 | 5.28E-05  |
| TCONS_00072519 | 0         | 13.189635 | up | Inf         | 4.87E-05 | 5.28E-05  |
| TCONS_00012408 | 0         | 13.143028 | up | Inf         | 4.87E-05 | 5.28E-05  |
| TCONS_00055222 | 0         | 13.023379 | up | Inf         | 4.87E-05 | 5.28E-05  |
| TCONS_00012164 | 2.5181769 | 12.982468 | up | 2.366113096 | 0.002741 | 0.002904  |
| TCONS_00096423 | 0         | 12.608397 | up | Inf         | 4.87E-05 | 5.28E-05  |
| TCONS_00055417 | 0         | 12.155154 | up | Inf         | 9.53E-05 | 0.0001028 |
| TCONS_00081455 | 0         | 11.959733 | up | Inf         | 9.53E-05 | 0.0001028 |
| TCONS_00073116 | 0         | 11.659803 | up | Inf         | 9.53E-05 | 0.0001028 |
| TCONS_00089326 | 0         | 11.641556 | up | Inf         | 9.53E-05 | 0.0001028 |
| TCONS_00089284 | 0         | 11.623366 | up | Inf         | 9.53E-05 | 0.0001028 |
| TCONS_00084078 | 0         | 11.479867 | up | Inf         | 0.000187 | 0.0002006 |
| TCONS_00072754 | 4.4329198 | 11.426965 | up | 1.366113096 | 0.022447 | 0.0232789 |
| TCONS_00011895 | 0         | 11.426965 | up | Inf         | 0.000187 | 0.0002006 |
| TCONS_00102566 | 0         | 11.374548 | up | Inf         | 0.000187 | 0.0002006 |
| TCONS_00055058 | 0         | 11.237091 | up | Inf         | 0.000187 | 0.0002006 |
| TCONS_00033143 | 0         | 11.220142 | up | Inf         | 0.000187 | 0.0002006 |
| TCONS_00055308 | 0         | 11.220142 | up | Inf         | 0.000187 | 0.0002006 |
| TCONS_00096567 | 0         | 11.220142 | up | Inf         | 0.000187 | 0.0002006 |
| TCONS_00055483 | 0         | 11.119513 | up | Inf         | 0.000187 | 0.0002006 |
| TCONS_00096706 | 0         | 11.020673 | up | Inf         | 0.000187 | 0.0002006 |
| TCONS_00012679 | 0         | 10.923574 | up | Inf         | 0.000187 | 0.0002006 |
| TCONS_00032870 | 0         | 10.749934 | up | Inf         | 0.000187 | 0.0002006 |
| TCONS_00073039 | 0         | 10.665167 | up | Inf         | 0.000187 | 0.0002006 |
| TCONS_00026243 | 0         | 10.418703 | up | Inf         | 0.000368 | 0.0003929 |
| TCONS_00043393 | 0         | 10.37511  | up | Inf         | 0.000368 | 0.0003929 |
| TCONS_00064277 | 0         | 10.37511  | up | Inf         | 0.000368 | 0.0003929 |
| TCONS_00072821 | 0         | 10.218344 | up | Inf         | 0.000368 | 0.0003929 |
| TCONS_00011820 | 0         | 10.121026 | up | Inf         | 0.000368 | 0.0003929 |
| TCONS_00032966 | 0         | 10.06352  | up | Inf         | 0.000368 | 0.0003929 |
| TCONS_00043674 | 0         | 9.9584392 | up | Inf         | 0.000368 | 0.0003929 |
| TCONS_00054670 | 0         | 9.9186054 | up | Inf         | 0.000368 | 0.0003929 |
| TCONS_00048468 | 0         | 9.8398864 | up | Inf         | 0.000368 | 0.0003929 |
| TCONS_00043289 | 0         | 9.5371206 | up | Inf         | 0.000368 | 0.0003929 |
| TCONS_00055050 | 0         | 9.4163976 | up | Inf         | 0.000726 | 0.0007739 |

|                |            |                 |              |                      |
|----------------|------------|-----------------|--------------|----------------------|
| TCONS_00033102 |            | 0 9. 3219976 up | Inf          | 0. 000726 0. 0007739 |
| TCONS_00037802 |            | 0 9. 150005 up  | Inf          | 0. 000726 0. 0007739 |
| TCONS_00102674 |            | 0 9. 1163653 up | Inf          | 0. 000726 0. 0007739 |
| TCONS_00055174 |            | 0 9. 016914 up  | Inf          | 0. 000726 0. 0007739 |
| TCONS_00054920 | 3. 3634391 | 8. 6701097 up   | 1. 366113096 | 0. 030927 0. 0318616 |
| TCONS_00089428 | 3. 3400819 | 8. 6099006 up   | 1. 366113096 | 0. 030927 0. 0318616 |
| TCONS_00072848 |            | 0 7. 9988754 up | Inf          | 0. 001441 0. 0015317 |
| TCONS_00096551 |            | 0 7. 830478 up  | Inf          | 0. 001441 0. 0015317 |
| TCONS_00054609 |            | 0 7. 4241059 up | Inf          | 0. 002878 0. 0030447 |
| TCONS_00064922 |            | 0 7. 4241059 up | Inf          | 0. 002878 0. 0030447 |
| TCONS_00044063 |            | 0 7. 2930922 up | Inf          | 0. 002878 0. 0030447 |
| TCONS_00072558 | 1. 8824728 | 7. 27882 up     | 1. 951075596 | 0. 041676 0. 0428989 |
| TCONS_00064477 |            | 0 7. 2293043 up | Inf          | 0. 002878 0. 0030447 |
| TCONS_00044167 |            | 0 7. 1666224 up | Inf          | 0. 002878 0. 0030447 |
| TCONS_00096348 |            | 0 6. 7935654 up | Inf          | 0. 002878 0. 0030447 |
| TCONS_00064381 |            | 0 6. 4574254 up | Inf          | 0. 005791 0. 0060878 |
| TCONS_00026138 |            | 0 6. 122596 up  | Inf          | 0. 005791 0. 0060878 |
| TCONS_00089056 |            | 0 6. 0185713 up | Inf          | 0. 005791 0. 0060878 |
| TCONS_00011838 |            | 0 5. 9607004 up | Inf          | 0. 005791 0. 0060878 |
| TCONS_00018911 |            | 0 5. 8852485 up | Inf          | 0. 005791 0. 0060878 |
| TCONS_00012668 |            | 0 5. 8759511 up | Inf          | 0. 005791 0. 0060878 |
| TCONS_00018585 |            | 0 5. 8207778 up | Inf          | 0. 005791 0. 0060878 |
| TCONS_00054886 |            | 0 5. 7935779 up | Inf          | 0. 005791 0. 0060878 |
| TCONS_00032916 |            | 0 5. 6613045 up | Inf          | 0. 005791 0. 0060878 |
| TCONS_00054631 |            | 0 5. 5848004 up | Inf          | 0. 005791 0. 0060878 |
| TCONS_00055235 |            | 0 5. 5597564 up | Inf          | 0. 005791 0. 0060878 |
| TCONS_00043785 |            | 0 5. 5349361 up | Inf          | 0. 005791 0. 0060878 |
| TCONS_00072536 |            | 0 5. 5103364 up | Inf          | 0. 005791 0. 0060878 |
| TCONS_00089379 |            | 0 5. 4859543 up | Inf          | 0. 01177 0. 0122535  |
| TCONS_00055154 |            | 0 5. 4617871 up | Inf          | 0. 01177 0. 0122535  |
| TCONS_00089009 |            | 0 5. 3672107 up | Inf          | 0. 01177 0. 0122535  |
| TCONS_00012542 |            | 0 5. 3440762 up | Inf          | 0. 01177 0. 0122535  |
| TCONS_00064677 |            | 0 5. 3211403 up | Inf          | 0. 01177 0. 0122535  |
| TCONS_00064371 |            | 0 5. 2984003 up | Inf          | 0. 01177 0. 0122535  |
| TCONS_00012890 |            | 0 5. 2534986 up | Inf          | 0. 01177 0. 0122535  |
| TCONS_00018808 |            | 0 5. 2534986 up | Inf          | 0. 01177 0. 0122535  |
| TCONS_00055571 |            | 0 5. 2093516 up | Inf          | 0. 01177 0. 0122535  |
| TCONS_00081618 |            | 0 5. 1232466 up | Inf          | 0. 01177 0. 0122535  |
| TCONS_00081747 |            | 0 5. 0195372 up | Inf          | 0. 01177 0. 0122535  |
| TCONS_00032946 |            | 0 4. 9593027 up | Inf          | 0. 01177 0. 0122535  |
| TCONS_00055597 |            | 0 4. 9593027 up | Inf          | 0. 01177 0. 0122535  |
| TCONS_00012023 |            | 0 4. 9199432 up | Inf          | 0. 01177 0. 0122535  |
| TCONS_00032868 |            | 0 4. 8908311 up | Inf          | 0. 01177 0. 0122535  |
| TCONS_00012320 |            | 0 4. 8812035 up | Inf          | 0. 01177 0. 0122535  |
| TCONS_00081098 |            | 0 4. 8812035 up | Inf          | 0. 01177 0. 0122535  |
| TCONS_00012297 |            | 0 4. 8430691 up | Inf          | 0. 01177 0. 0122535  |
| TCONS_00048442 |            | 0 4. 8055259 up | Inf          | 0. 01177 0. 0122535  |
| TCONS_00081217 |            | 0 4. 7685603 up | Inf          | 0. 01177 0. 0122535  |
| TCONS_00055363 |            | 0 4. 6963094 up | Inf          | 0. 01177 0. 0122535  |

|                |                            |               |           |            |
|----------------|----------------------------|---------------|-----------|------------|
| TCONS_00081047 | 0 4. 6435419 up            | Inf           | 0. 01177  | 0. 0122535 |
| TCONS_00064600 | 0 4. 591947 up             | Inf           | 0. 01177  | 0. 0122535 |
| TCONS_00012491 | 0 4. 5750025 up            | Inf           | 0. 01177  | 0. 0122535 |
| TCONS_00019076 | 0 4. 4438196 up            | Inf           | 0. 024257 | 0. 0250433 |
| TCONS_00055205 | 0 4. 396545 up             | Inf           | 0. 024257 | 0. 0250433 |
| TCONS_00102529 | 0 4. 396545 up             | Inf           | 0. 024257 | 0. 0250433 |
| TCONS_00064598 | 0 4. 3655834 up            | Inf           | 0. 024257 | 0. 0250433 |
| TCONS_00072686 | 0 4. 3502655 up            | Inf           | 0. 024257 | 0. 0250433 |
| TCONS_00018841 | 0 4. 275261 up             | Inf           | 0. 024257 | 0. 0250433 |
| TCONS_00089567 | 0 4. 275261 up             | Inf           | 0. 024257 | 0. 0250433 |
| TCONS_00026124 | 0 4. 2170942 up            | Inf           | 0. 024257 | 0. 0250433 |
| TCONS_00055562 | 0 4. 2170942 up            | Inf           | 0. 024257 | 0. 0250433 |
| TCONS_00064858 | 0 4. 2027989 up            | Inf           | 0. 024257 | 0. 0250433 |
| TCONS_00054647 | 0 4. 1327523 up            | Inf           | 0. 024257 | 0. 0250433 |
| TCONS_00081591 | 0 4. 1190222 up            | Inf           | 0. 024257 | 0. 0250433 |
| TCONS_00096949 | 0 4. 1190222 up            | Inf           | 0. 024257 | 0. 0250433 |
| TCONS_00025792 | 0 3. 9484894 up            | Inf           | 0. 024257 | 0. 0250433 |
| TCONS_00054632 | 0 3. 7915158 up            | Inf           | 0. 024257 | 0. 0250433 |
| TCONS_00055312 | 0 3. 6465461 up            | Inf           | 0. 024257 | 0. 0250433 |
| TCONS_00064392 | 0 3. 6041444 up            | Inf           | 0. 024257 | 0. 0250433 |
| TCONS_00089321 | 0 3. 5627175 up            | Inf           | 0. 024257 | 0. 0250433 |
| TCONS_00018934 | 0 3. 5122541 up            | Inf           | 0. 024257 | 0. 0250433 |
| TCONS_00045383 | 87180. 822 39511. 393 down | -1. 141742112 | 0         | 0          |
| TCONS_00078074 | 46381. 072 30395. 566 down | -0. 609675264 | 0         | 0          |
| TCONS_00081509 | 47554. 937 27094. 534 down | -0. 811593275 | 0         | 0          |
| TCONS_00009022 | 25773. 981 25308. 188 down | -0. 026311166 | 0         | 0          |
| TCONS_00057687 | 53645. 533 24473. 273 down | -1. 132250956 | 0         | 0          |
| TCONS_00013005 | 18958. 191 5858. 4398 down | -1. 694232936 | 0         | 0          |
| TCONS_00081331 | 9256. 3307 5655. 1733 down | -0. 710869181 | 6. 99E-52 | 3. 22E-51  |
| TCONS_00033099 | 5524. 5112 3516. 8188 down | -0. 651575796 | 3. 17E-23 | 5. 25E-23  |
| TCONS_00031630 | 3524. 3549 3261. 412 down  | -0. 111862515 | 3. 41E-11 | 4. 03E-11  |
| TCONS_00035754 | 6370. 674 2765. 765 down   | -1. 203767449 | 0         | 0          |
| TCONS_00031662 | 3857. 1839 2744. 5953 down | -0. 490954491 | 4. 41E-05 | 4. 79E-05  |
| TCONS_00050376 | 3441. 8015 2280. 0184 down | -0. 59411844  | 1. 16E-10 | 1. 36E-10  |
| TCONS_00015565 | 2015. 3471 1972. 0717 down | -0. 031316339 | 6. 96E-12 | 8. 33E-12  |
| TCONS_00031643 | 1711. 247 1498. 4179 down  | -0. 191607991 | 0. 002891 | 0. 0030574 |
| TCONS_00095506 | 1480. 0252 1474. 2859 down | -0. 005605366 | 1. 75E-10 | 2. 05E-10  |
| TCONS_00098987 | 3519. 3058 1460. 1431 down | -1. 269181081 | 0         | 0          |
| TCONS_00031684 | 1816. 2165 1305. 4733 down | -0. 476363287 | 0. 011014 | 0. 0115284 |
| TCONS_00012121 | 1980. 4351 1153. 9854 down | -0. 77919252  | 2. 86E-16 | 3. 73E-16  |
| TCONS_00031681 | 1312. 3903 1129. 0055 down | -0. 217144293 | 0. 029993 | 0. 0309125 |
| TCONS_00032817 | 2955. 9991 1072. 9261 down | -1. 462095142 | 0         | 0          |
| TCONS_00014767 | 2517. 1658 948. 95144 down | -1. 407394056 | 2. 73E-87 | 2. 72E-86  |
| TCONS_00031683 | 1242. 2249 853. 54587 down | -0. 541385754 | 0. 002145 | 0. 0022757 |
| TCONS_00102384 | 1980. 3184 777. 8374 down  | -1. 348191901 | 3. 03E-63 | 1. 82E-62  |
| TCONS_00033097 | 1107. 4961 766. 18441 down | -0. 531538045 | 0. 005635 | 0. 0059423 |
| TCONS_00033073 | 722. 50556 720. 86814 down | -0. 003273291 | 7. 27E-06 | 7. 94E-06  |
| TCONS_00072996 | 720. 59573 719. 89878 down | -0. 001396033 | 6. 56E-06 | 7. 20E-06  |
| TCONS_00012120 | 740. 85508 714. 00195 down | -0. 053263339 | 0. 000122 | 0. 0001311 |

|                |           |           |      |              |          |           |
|----------------|-----------|-----------|------|--------------|----------|-----------|
| TCONS_00033044 | 1308.5779 | 620.52552 | down | -1.076437392 | 6.33E-26 | 1.17E-25  |
| TCONS_00032848 | 916.35963 | 584.89767 | down | -0.647729672 | 6.92E-05 | 7.50E-05  |
| TCONS_00028528 | 1705.1903 | 540.86355 | down | -1.656596143 | 3.45E-81 | 3.02E-80  |
| TCONS_00004309 | 1102.0191 | 512.34299 | down | -1.10496736  | 1.59E-23 | 2.66E-23  |
| TCONS_00033108 | 776.47721 | 504.17894 | down | -0.623007711 | 0.000711 | 0.0007588 |
| TCONS_00012202 | 537.66913 | 500.85673 | down | -0.10232066  | 0.007072 | 0.0074314 |
| TCONS_00042166 | 1096.4454 | 480.5696  | down | -1.190016723 | 1.83E-27 | 3.59E-27  |
| TCONS_00051606 | 886.70778 | 473.30403 | down | -0.90569152  | 5.06E-12 | 6.07E-12  |
| TCONS_00036148 | 741.97697 | 444.30613 | down | -0.739820349 | 4.16E-06 | 4.57E-06  |
| TCONS_00015566 | 633.02094 | 431.93927 | down | -0.551424744 | 0.021084 | 0.0218748 |
| TCONS_00071993 | 1664.4467 | 425.99922 | down | -1.966120008 | 0        | 0         |
| TCONS_00032818 | 1099.8097 | 410.05908 | down | -1.423350227 | 4.76E-40 | 1.53E-39  |
| TCONS_00064357 | 875.8437  | 409.4486  | down | -1.096991062 | 9.44E-19 | 1.33E-18  |
| TCONS_00087597 | 1050.5721 | 395.62977 | down | -1.408952288 | 1.60E-37 | 4.68E-37  |
| TCONS_00010172 | 2319.2491 | 389.20094 | down | -2.575070677 | 0        | 0         |
| TCONS_00032438 | 1778.2957 | 385.35123 | down | -2.206249368 | 0        | 0         |
| TCONS_00042165 | 2200.8383 | 371.23379 | down | -2.567653206 | 0        | 0         |
| TCONS_00033081 | 550.73618 | 369.18101 | down | -0.577033056 | 0.015457 | 0.0160643 |
| TCONS_00013089 | 1230.8952 | 366.88719 | down | -1.746299447 | 8.48E-65 | 5.26E-64  |
| TCONS_00073030 | 500.70397 | 328.50082 | down | -0.608060917 | 0.010087 | 0.0105627 |
| TCONS_00004311 | 639.34056 | 325.07625 | down | -0.975806474 | 9.25E-11 | 1.09E-10  |
| TCONS_00096525 | 777.9196  | 315.34697 | down | -1.302680996 | 3.05E-24 | 5.28E-24  |
| TCONS_00058773 | 680.04471 | 310.89284 | down | -1.129212192 | 8.47E-16 | 1.10E-15  |
| TCONS_00081330 | 911.4067  | 309.95642 | down | -1.556029584 | 1.66E-39 | 5.24E-39  |
| TCONS_00055532 | 534.11032 | 302.05385 | down | -0.822331994 | 3.67E-06 | 4.04E-06  |
| TCONS_00072851 | 680.99498 | 299.13255 | down | -1.186859291 | 1.20E-17 | 1.62E-17  |
| TCONS_00100811 | 644.08397 | 291.08951 | down | -1.145785943 | 1.51E-15 | 1.94E-15  |
| TCONS_00011487 | 1287.0273 | 289.12931 | down | -2.154255878 | 0        | 0         |
| TCONS_00073960 | 801.82814 | 283.75724 | down | -1.498635832 | 1.22E-32 | 2.97E-32  |
| TCONS_00081074 | 799.53753 | 283.38873 | down | -1.49638338  | 1.27E-32 | 3.09E-32  |
| TCONS_00055210 | 295.56926 | 280.51922 | down | -0.075396615 | 0.025115 | 0.0259181 |
| TCONS_00088076 | 858.8782  | 279.20678 | down | -1.621119608 | 2.66E-40 | 8.61E-40  |
| TCONS_00033080 | 595.58635 | 271.70648 | down | -1.13226172  | 4.08E-14 | 5.09E-14  |
| TCONS_00013006 | 599.16955 | 269.05308 | down | -1.155073495 | 8.26E-15 | 1.04E-14  |
| TCONS_00028766 | 541.09327 | 268.93278 | down | -1.008631698 | 4.74E-10 | 5.50E-10  |
| TCONS_00093787 | 1246.4621 | 268.28494 | down | -2.216001043 | 0        | 0         |
| TCONS_00043575 | 506.39669 | 261.61459 | down | -0.952824957 | 2.72E-08 | 3.07E-08  |
| TCONS_00067580 | 694.83096 | 252.75884 | down | -1.458900493 | 4.16E-27 | 8.02E-27  |
| TCONS_00088966 | 627.06652 | 251.38011 | down | -1.318747975 | 2.41E-20 | 3.60E-20  |
| TCONS_00021455 | 1645.4298 | 250.14027 | down | -2.717655262 | 0        | 0         |
| TCONS_00100911 | 467.35938 | 248.54996 | down | -0.910996495 | 5.43E-07 | 6.04E-07  |
| TCONS_00089599 | 572.26737 | 246.81715 | down | -1.213246699 | 1.05E-15 | 1.35E-15  |
| TCONS_00097280 | 895.15822 | 244.64283 | down | -1.871465729 | 3.07E-53 | 1.47E-52  |
| TCONS_00012426 | 1007.5278 | 242.54184 | down | -2.054514085 | 4.76E-69 | 3.22E-68  |
| TCONS_00028523 | 942.64959 | 241.57062 | down | -1.964276578 | 1.88E-60 | 1.07E-59  |
| TCONS_00089143 | 431.59446 | 240.42247 | down | -0.844104612 | 1.28E-05 | 1.39E-05  |
| TCONS_00087594 | 629.06393 | 234.78988 | down | -1.421836427 | 1.67E-23 | 2.79E-23  |
| TCONS_00072411 | 404.15147 | 234.02799 | down | -0.788215051 | 0.000168 | 0.0001812 |
| TCONS_00072141 | 555.37627 | 219.1957  | down | -1.341246036 | 9.39E-19 | 1.32E-18  |

|                |           |           |      |              |          |           |
|----------------|-----------|-----------|------|--------------|----------|-----------|
| TCONS_00057423 | 393.31806 | 211.4656  | down | -0.895273457 | 6.07E-06 | 6.66E-06  |
| TCONS_00073101 | 560.79264 | 208.39623 | down | -1.428138239 | 1.91E-21 | 2.95E-21  |
| TCONS_00026013 | 330.33186 | 208.02444 | down | -0.667163059 | 0.011481 | 0.0120146 |
| TCONS_00083478 | 1469.3102 | 207.8976  | down | -2.821193984 | 0        | 0         |
| TCONS_00018965 | 438.2872  | 206.44856 | down | -1.086094196 | 6.52E-10 | 7.55E-10  |
| TCONS_00099933 | 335.78272 | 202.78159 | down | -0.727601339 | 0.002723 | 0.0028854 |
| TCONS_00033100 | 623.84871 | 202.38331 | down | -1.624105883 | 6.83E-30 | 1.49E-29  |
| TCONS_00072466 | 331.96485 | 201.77555 | down | -0.718279092 | 0.003655 | 0.0038607 |
| TCONS_00027638 | 616.51839 | 197.24499 | down | -1.64415524  | 3.31E-30 | 7.31E-30  |
| TCONS_00089064 | 609.96423 | 195.89761 | down | -1.638624823 | 1.35E-29 | 2.89E-29  |
| TCONS_00000261 | 379.71457 | 195.76195 | down | -0.955814999 | 1.20E-06 | 1.33E-06  |
| TCONS_00054545 | 1621.1295 | 195.10848 | down | -3.054651015 | 0        | 0         |
| TCONS_00028567 | 712.66917 | 194.96705 | down | -1.870002185 | 8.09E-43 | 2.86E-42  |
| TCONS_00048346 | 1166.644  | 193.09544 | down | -2.594978377 | 0        | 0         |
| TCONS_00057230 | 437.66887 | 191.35573 | down | -1.193582646 | 4.38E-12 | 5.26E-12  |
| TCONS_00083814 | 874.95933 | 191.24971 | down | -2.193758424 | 2.53E-66 | 1.62E-65  |
| TCONS_00054420 | 421.6739  | 191.06903 | down | -1.142033808 | 1.19E-10 | 1.39E-10  |
| TCONS_00096387 | 377.04322 | 188.98515 | down | -0.996456984 | 3.09E-07 | 3.45E-07  |
| TCONS_00043369 | 575.50763 | 183.83622 | down | -1.646414002 | 2.74E-28 | 5.56E-28  |
| TCONS_00041814 | 368.33916 | 180.48095 | down | -1.029188185 | 1.20E-07 | 1.35E-07  |
| TCONS_00019063 | 1090.3431 | 179.05579 | down | -2.606301073 | 0        | 0         |
| TCONS_00032823 | 1223.9784 | 177.75279 | down | -2.783634024 | 0        | 0         |
| TCONS_00028565 | 652.01647 | 177.11795 | down | -1.880197952 | 1.17E-39 | 3.71E-39  |
| TCONS_00012376 | 373.04642 | 175.38997 | down | -1.088788864 | 1.04E-08 | 1.18E-08  |
| TCONS_00055074 | 358.85423 | 175.34283 | down | -1.033219503 | 1.44E-07 | 1.61E-07  |
| TCONS_00073111 | 302.16121 | 175.00522 | down | -0.787920533 | 0.00116  | 0.0012349 |
| TCONS_00064915 | 295.55368 | 172.49749 | down | -0.776844858 | 0.001425 | 0.0015146 |
| TCONS_00043596 | 756.99341 | 170.42277 | down | -2.151162597 | 4.05E-56 | 2.08E-55  |
| TCONS_00089173 | 292.06298 | 169.79525 | down | -0.782483396 | 0.001633 | 0.0017346 |
| TCONS_00038148 | 604.10057 | 168.61629 | down | -1.841044812 | 1.61E-35 | 4.34E-35  |
| TCONS_00089200 | 282.07368 | 167.79596 | down | -0.749364122 | 0.003985 | 0.0042066 |
| TCONS_00085607 | 430.76045 | 166.89961 | down | -1.367905214 | 1.82E-15 | 2.33E-15  |
| TCONS_00064827 | 301.01636 | 166.57522 | down | -0.853668112 | 0.000257 | 0.0002757 |
| TCONS_00064443 | 381.57857 | 164.91743 | down | -1.210236275 | 5.68E-11 | 6.68E-11  |
| TCONS_00066213 | 700.06398 | 164.77855 | down | -2.086958358 | 1.26E-49 | 5.51E-49  |
| TCONS_00054728 | 276.52924 | 164.49776 | down | -0.749364122 | 0.003594 | 0.0037968 |
| TCONS_00015959 | 686.28782 | 164.16664 | down | -2.063652741 | 5.64E-48 | 2.34E-47  |
| TCONS_00032816 | 420.657   | 163.44969 | down | -1.363797741 | 3.63E-15 | 4.63E-15  |
| TCONS_00102574 | 266.92229 | 162.67216 | down | -0.714452386 | 0.010024 | 0.010499  |
| TCONS_00013035 | 260.48366 | 161.25665 | down | -0.691834253 | 0.015982 | 0.0166063 |
| TCONS_00072961 | 404.01631 | 161.17734 | down | -1.325764609 | 8.78E-14 | 1.09E-13  |
| TCONS_00064401 | 493.46457 | 161.01632 | down | -1.615739558 | 1.22E-23 | 2.07E-23  |
| TCONS_00072872 | 541.29707 | 159.70636 | down | -1.760998822 | 9.09E-30 | 1.97E-29  |
| TCONS_00060509 | 2146.246  | 158.87213 | down | -3.755877429 | 0        | 0         |
| TCONS_00057335 | 1329.4277 | 157.88042 | down | -3.073901069 | 0        | 0         |
| TCONS_00026025 | 668.3634  | 156.99091 | down | -2.089951672 | 1.42E-47 | 5.85E-47  |
| TCONS_00064387 | 259.53428 | 156.51265 | down | -0.729645887 | 0.008253 | 0.0086517 |
| TCONS_00102523 | 355.6     | 152.77473 | down | -1.218849405 | 1.91E-10 | 2.23E-10  |
| TCONS_00032792 | 466.6855  | 151.39786 | down | -1.624105883 | 8.02E-23 | 1.31E-22  |

|                |           |           |      |              |          |           |
|----------------|-----------|-----------|------|--------------|----------|-----------|
| TCONS_00043603 | 329.68999 | 150.60789 | down | -1.13031273  | 2.13E-08 | 2.41E-08  |
| TCONS_00044137 | 289.517   | 150.46428 | down | -0.944227025 | 2.47E-05 | 2.69E-05  |
| TCONS_00072468 | 483.15095 | 149.26057 | down | -1.694640935 | 3.08E-25 | 5.51E-25  |
| TCONS_00081690 | 257.48264 | 149.15196 | down | -0.78769224  | 0.00277  | 0.002934  |
| TCONS_00058191 | 322.59118 | 147.7772  | down | -1.126283286 | 3.21E-08 | 3.62E-08  |
| TCONS_00032838 | 500.87408 | 145.35887 | down | -1.784828802 | 1.71E-28 | 3.50E-28  |
| TCONS_00008151 | 309.77844 | 143.59563 | down | -1.109224914 | 1.14E-07 | 1.28E-07  |
| TCONS_00031691 | 709.17009 | 141.78055 | down | -2.322472036 | 2.84E-58 | 1.54E-57  |
| TCONS_00102352 | 289.87139 | 141.14087 | down | -1.038277159 | 2.04E-06 | 2.25E-06  |
| TCONS_00089426 | 749.30343 | 139.2085  | down | -2.428302771 | 2.95E-65 | 1.85E-64  |
| TCONS_00036853 | 369.2055  | 139.19714 | down | -1.407294494 | 3.29E-14 | 4.11E-14  |
| TCONS_00078150 | 360.52117 | 139.18596 | down | -1.373070324 | 2.32E-13 | 2.84E-13  |
| TCONS_00022105 | 282.49015 | 138.02282 | down | -1.033293752 | 3.66E-06 | 4.03E-06  |
| TCONS_00048349 | 263.73634 | 137.75841 | down | -0.936955972 | 8.32E-05 | 9.00E-05  |
| TCONS_00055471 | 218.27744 | 137.39493 | down | -0.667834236 | 0.03754  | 0.038658  |
| TCONS_00025781 | 540.98761 | 137.2742  | down | -1.978535076 | 5.96E-36 | 1.64E-35  |
| TCONS_00012698 | 352.71265 | 137.13223 | down | -1.362925583 | 6.74E-13 | 8.21E-13  |
| TCONS_00083300 | 615.08893 | 137.09611 | down | -2.165607384 | 2.84E-46 | 1.12E-45  |
| TCONS_00043420 | 255.29843 | 135.88669 | down | -0.909780521 | 0.000216 | 0.0002316 |
| TCONS_00077303 | 391.25685 | 134.90331 | down | -1.53619023  | 1.84E-17 | 2.46E-17  |
| TCONS_00032813 | 424.1157  | 134.67755 | down | -1.65494852  | 2.36E-21 | 3.62E-21  |
| TCONS_00018813 | 484.13608 | 134.58634 | down | -1.846880628 | 6.59E-29 | 1.38E-28  |
| TCONS_00081536 | 562.87986 | 133.80297 | down | -2.0727169   | 7.29E-40 | 2.32E-39  |
| TCONS_00102245 | 1065.7505 | 133.79414 | down | -2.993782849 | 0        | 0         |
| TCONS_00018724 | 324.25065 | 132.34094 | down | -1.292849986 | 7.73E-11 | 9.10E-11  |
| TCONS_00081676 | 234.25569 | 131.69133 | down | -0.830923751 | 0.002034 | 0.0021596 |
| TCONS_00019503 | 616.05955 | 130.10516 | down | -2.243391589 | 1.15E-48 | 4.88E-48  |
| TCONS_00030509 | 321.9408  | 129.98172 | down | -1.308486617 | 5.49E-11 | 6.47E-11  |
| TCONS_00096861 | 253.4645  | 129.8865  | down | -0.964532216 | 6.52E-05 | 7.07E-05  |
| TCONS_00050726 | 1116.1375 | 127.62911 | down | -3.128485377 | 0        | 0         |
| TCONS_00012247 | 217.27297 | 126.85475 | down | -0.776331169 | 0.007531 | 0.0079088 |
| TCONS_00064244 | 263.19975 | 126.7592  | down | -1.054067707 | 4.70E-06 | 5.17E-06  |
| TCONS_00012965 | 269.11517 | 125.45855 | down | -1.101012915 | 7.96E-07 | 8.84E-07  |
| TCONS_00043558 | 358.97603 | 122.89817 | down | -1.546424063 | 2.31E-16 | 3.02E-16  |
| TCONS_00084563 | 212.05785 | 122.79424 | down | -0.788215051 | 0.006693 | 0.0070347 |
| TCONS_00096772 | 234.93622 | 122.79043 | down | -0.936071064 | 0.000214 | 0.0002294 |
| TCONS_00058030 | 889.68491 | 122.23633 | down | -2.863621301 | 0        | 0         |
| TCONS_00044449 | 530.30223 | 121.86321 | down | -2.121552204 | 6.84E-39 | 2.11E-38  |
| TCONS_00026018 | 328.66406 | 121.3996  | down | -1.436850057 | 2.10E-13 | 2.58E-13  |
| TCONS_00089296 | 571.36324 | 120.81828 | down | -2.241569481 | 4.48E-45 | 1.70E-44  |
| TCONS_00043984 | 203.54606 | 120.48463 | down | -0.756506191 | 0.010754 | 0.0112587 |
| TCONS_00004544 | 346.74711 | 118.93677 | down | -1.543689095 | 7.64E-16 | 9.89E-16  |
| TCONS_00102584 | 305.55855 | 118.31016 | down | -1.368874849 | 1.62E-11 | 1.93E-11  |
| TCONS_00081667 | 420.00354 | 116.41556 | down | -1.85111762  | 1.31E-25 | 2.40E-25  |
| TCONS_00018994 | 259.41627 | 115.66887 | down | -1.165268365 | 2.98E-07 | 3.32E-07  |
| TCONS_00089037 | 464.89819 | 114.73965 | down | -2.018550754 | 6.16E-32 | 1.46E-31  |
| TCONS_00080233 | 433.69679 | 113.91561 | down | -1.928721338 | 5.18E-28 | 1.03E-27  |
| TCONS_00051025 | 607.12833 | 113.23935 | down | -2.422626148 | 4.21E-53 | 2.00E-52  |
| TCONS_00085943 | 217.4829  | 113.20148 | down | -0.9420092   | 0.000322 | 0.0003456 |

|                |           |           |      |              |          |           |
|----------------|-----------|-----------|------|--------------|----------|-----------|
| TCONS_00071269 | 373.50541 | 112.03986 | down | -1.737117061 | 9.88E-21 | 1.49E-20  |
| TCONS_00039269 | 296.76983 | 111.51237 | down | -1.412140707 | 1.06E-11 | 1.26E-11  |
| TCONS_00075208 | 881.27998 | 110.17224 | down | -2.999839623 | 0        | 0         |
| TCONS_00043784 | 300.60737 | 110.1161  | down | -1.44885501  | 1.57E-12 | 1.91E-12  |
| TCONS_00018932 | 343.96771 | 109.4911  | down | -1.651459534 | 9.58E-18 | 1.29E-17  |
| TCONS_00017180 | 404.17798 | 109.39638 | down | -1.885425671 | 2.15E-25 | 3.89E-25  |
| TCONS_00072478 | 436.32818 | 108.56617 | down | -2.006839002 | 1.04E-29 | 2.25E-29  |
| TCONS_00011733 | 231.33245 | 107.25136 | down | -1.108971787 | 4.27E-06 | 4.70E-06  |
| TCONS_00043158 | 226.0154  | 106.57527 | down | -1.084548313 | 1.14E-05 | 1.25E-05  |
| TCONS_00023793 | 337.79481 | 106.08134 | down | -1.670976223 | 1.01E-17 | 1.36E-17  |
| TCONS_00010307 | 1189.8923 | 105.76712 | down | -3.491867899 | 0        | 0         |
| TCONS_00064555 | 241.94339 | 105.19733 | down | -1.201571414 | 2.19E-07 | 2.45E-07  |
| TCONS_00102216 | 1476.2134 | 104.90833 | down | -3.814700222 | 0        | 0         |
| TCONS_00054412 | 399.96602 | 104.40637 | down | -1.937667652 | 3.02E-26 | 5.64E-26  |
| TCONS_00031703 | 258.98481 | 103.78631 | down | -1.319251302 | 3.25E-09 | 3.71E-09  |
| TCONS_00081774 | 320.17142 | 103.16529 | down | -1.633886904 | 3.07E-16 | 4.00E-16  |
| TCONS_00077192 | 180.05183 | 103.13974 | down | -0.803811906 | 0.009294 | 0.0097367 |
| TCONS_00033169 | 263.20897 | 102.50527 | down | -1.360510554 | 8.32E-10 | 9.59E-10  |
| TCONS_00051734 | 194.15375 | 102.37093 | down | -0.923393521 | 0.000865 | 0.0009216 |
| TCONS_00089172 | 809.28332 | 101.93595 | down | -2.988981863 | 6.83E-89 | 6.99E-88  |
| TCONS_00085106 | 712.63791 | 100.03483 | down | -2.832666768 | 2.10E-74 | 1.59E-73  |
| TCONS_00095481 | 487.59675 | 99.049435 | down | -2.299467865 | 3.10E-40 | 9.99E-40  |
| TCONS_00012610 | 192.38872 | 98.550246 | down | -0.965092813 | 0.000553 | 0.0005906 |
| TCONS_00089203 | 230.32452 | 98.225626 | down | -1.229496649 | 2.24E-07 | 2.51E-07  |
| TCONS_00033074 | 441.9226  | 98.204014 | down | -2.169939804 | 6.91E-34 | 1.78E-33  |
| TCONS_00018648 | 327.73194 | 98.032728 | down | -1.741180917 | 1.97E-18 | 2.75E-18  |
| TCONS_00010082 | 251.86536 | 97.778051 | down | -1.365070146 | 1.39E-09 | 1.60E-09  |
| TCONS_00081638 | 373.79873 | 97.703654 | down | -1.935777246 | 1.97E-24 | 3.42E-24  |
| TCONS_00102439 | 486.63029 | 97.24123  | down | -2.323186065 | 9.23E-41 | 3.01E-40  |
| TCONS_00081691 | 171.01219 | 96.430886 | down | -0.826531982 | 0.007552 | 0.0079284 |
| TCONS_00041116 | 537.38207 | 95.665562 | down | -2.489876602 | 1.35E-48 | 5.70E-48  |
| TCONS_00054602 | 331.61018 | 95.371206 | down | -1.797862639 | 1.05E-19 | 1.53E-19  |
| TCONS_00065227 | 373.66838 | 94.369934 | down | -1.985359275 | 1.43E-25 | 2.61E-25  |
| TCONS_00036690 | 488.89655 | 94.283322 | down | -2.374454735 | 4.37E-42 | 1.50E-41  |
| TCONS_00089375 | 245.02337 | 93.571749 | down | -1.388774406 | 1.35E-09 | 1.55E-09  |
| TCONS_00089199 | 175.01669 | 93.571749 | down | -0.903347579 | 0.002566 | 0.0027203 |
| TCONS_00034075 | 266.84052 | 93.411524 | down | -1.514305288 | 3.16E-12 | 3.81E-12  |
| TCONS_00050567 | 1259.859  | 92.524305 | down | -3.76728603  | 0        | 0         |
| TCONS_00033084 | 190.73019 | 92.185315 | down | -1.048924404 | 8.92E-05 | 9.65E-05  |
| TCONS_00028511 | 325.10131 | 91.838939 | down | -1.823711463 | 1.39E-19 | 2.01E-19  |
| TCONS_00004101 | 537.68502 | 91.370373 | down | -2.556962928 | 1.41E-50 | 6.35E-50  |
| TCONS_00065589 | 384.45571 | 91.224632 | down | -2.075322094 | 7.61E-28 | 1.51E-27  |
| TCONS_00084783 | 826.62431 | 90.99638  | down | -3.183350724 | 0        | 0         |
| TCONS_00083420 | 154.55049 | 89.294924 | down | -0.791428181 | 0.016844 | 0.0174982 |
| TCONS_00039089 | 626.02678 | 88.558977 | down | -2.821513907 | 4.56E-65 | 2.85E-64  |
| TCONS_00043580 | 198.53381 | 88.341388 | down | -1.168223332 | 4.74E-06 | 5.21E-06  |
| TCONS_00038951 | 751.05596 | 88.218366 | down | -3.089769456 | 1.68E-85 | 1.59E-84  |
| TCONS_00084952 | 572.36567 | 88.049041 | down | -2.700557944 | 5.62E-57 | 2.94E-56  |
| TCONS_00036366 | 210.18846 | 87.861662 | down | -1.258377769 | 4.27E-07 | 4.76E-07  |



|                |           |           |      |              |          |           |
|----------------|-----------|-----------|------|--------------|----------|-----------|
| TCONS_00064550 | 271.6076  | 87.517107 | down | -1.633886904 | 6.32E-14 | 7.86E-14  |
| TCONS_00043987 | 551.8843  | 87.423606 | down | -2.658271063 | 3.02E-54 | 1.49E-53  |
| TCONS_00031642 | 268.24372 | 87.383015 | down | -1.618119588 | 1.13E-13 | 1.39E-13  |
| TCONS_00102647 | 330.21944 | 87.237201 | down | -1.920409663 | 1.34E-21 | 2.07E-21  |
| TCONS_00001330 | 251.72356 | 86.903669 | down | -1.534351231 | 8.67E-12 | 1.03E-11  |
| TCONS_00041676 | 331.42594 | 86.822527 | down | -1.93254522  | 9.84E-22 | 1.54E-21  |
| TCONS_00072614 | 254.63213 | 85.801085 | down | -1.569346652 | 2.35E-12 | 2.83E-12  |
| TCONS_00055170 | 438.62208 | 85.774104 | down | -2.354364376 | 2.10E-37 | 6.12E-37  |
| TCONS_00088062 | 204.66885 | 85.732627 | down | -1.255375281 | 6.08E-07 | 6.76E-07  |
| TCONS_00011092 | 375.39262 | 85.67901  | down | -2.131386564 | 4.14E-28 | 8.36E-28  |
| TCONS_00017149 | 496.23021 | 85.505219 | down | -2.536925174 | 5.44E-46 | 2.14E-45  |
| TCONS_00048054 | 383.57875 | 84.972477 | down | -2.174455286 | 1.05E-29 | 2.26E-29  |
| TCONS_00054915 | 283.29083 | 84.259998 | down | -1.749364122 | 2.97E-16 | 3.87E-16  |
| TCONS_00055467 | 361.40818 | 84.055978 | down | -2.104206839 | 9.52E-27 | 1.81E-26  |
| TCONS_00043643 | 416.68732 | 83.852945 | down | -2.313031844 | 7.87E-35 | 2.08E-34  |
| TCONS_00096724 | 794.29825 | 83.194267 | down | -3.255124791 | 0        | 0         |
| TCONS_00043967 | 915.7439  | 82.938596 | down | -3.464828647 | 0        | 0         |
| TCONS_00032776 | 253.66321 | 82.796578 | down | -1.615271226 | 6.50E-13 | 7.92E-13  |
| TCONS_00043802 | 388.1901  | 82.471775 | down | -2.234790949 | 3.00E-31 | 6.93E-31  |
| TCONS_00012765 | 1452.5496 | 82.145615 | down | -4.144260089 | 0        | 0         |
| TCONS_00054909 | 436.37838 | 82.107661 | down | -2.409990892 | 2.42E-38 | 7.25E-38  |
| TCONS_00088943 | 447.47794 | 79.431729 | down | -2.494029241 | 4.49E-41 | 1.48E-40  |
| TCONS_00000483 | 140.77223 | 79.379083 | down | -0.826531982 | 0.014741 | 0.0153234 |
| TCONS_00060657 | 248.29147 | 78.567006 | down | -1.660039192 | 4.07E-13 | 4.97E-13  |
| TCONS_00035603 | 364.87515 | 77.732018 | down | -2.230822047 | 3.25E-29 | 6.88E-29  |
| TCONS_00057998 | 130.97893 | 77.489105 | down | -0.75726932  | 0.040487 | 0.0416839 |
| TCONS_00013118 | 313.78908 | 77.350978 | down | -2.020303726 | 2.73E-22 | 4.38E-22  |
| TCONS_00076923 | 140.94412 | 77.205262 | down | -0.868352158 | 0.009256 | 0.0096986 |
| TCONS_00032834 | 653.72394 | 76.888414 | down | -3.087843393 | 1.53E-74 | 1.17E-73  |
| TCONS_00023447 | 164.54298 | 76.129647 | down | -1.111934201 | 8.85E-05 | 9.57E-05  |
| TCONS_00017931 | 1522.0626 | 75.854314 | down | -4.326652694 | 0        | 0         |
| TCONS_00081206 | 498.90634 | 75.650381 | down | -2.721349745 | 3.12E-50 | 1.39E-49  |
| TCONS_00066214 | 585.85955 | 75.510012 | down | -2.955814999 | 5.15E-64 | 3.14E-63  |
| TCONS_00086904 | 540.919   | 75.46765  | down | -2.841482324 | 2.99E-57 | 1.58E-56  |
| TCONS_00011796 | 186.38644 | 75.326027 | down | -1.307076588 | 6.02E-07 | 6.69E-07  |
| TCONS_00092979 | 579.35239 | 75.14095  | down | -2.94676986  | 2.61E-63 | 1.57E-62  |
| TCONS_00030255 | 212.88915 | 74.948479 | down | -1.506131357 | 7.12E-10 | 8.22E-10  |
| TCONS_00025842 | 253.8854  | 74.534975 | down | -1.768187996 | 7.65E-15 | 9.68E-15  |
| TCONS_00085797 | 419.30874 | 74.177605 | down | -2.498957324 | 1.25E-38 | 3.80E-38  |
| TCONS_00055311 | 179.19963 | 73.909131 | down | -1.277743094 | 2.04E-06 | 2.26E-06  |
| TCONS_00102633 | 195.42444 | 73.362466 | down | -1.413496836 | 2.85E-08 | 3.21E-08  |
| TCONS_00089615 | 157.29895 | 73.102929 | down | -1.105507932 | 0.000165 | 0.0001778 |
| TCONS_00052762 | 220.60573 | 72.73644  | down | -1.60072004  | 3.02E-11 | 3.57E-11  |
| TCONS_00061637 | 372.64481 | 72.602405 | down | -2.359711941 | 4.64E-32 | 1.10E-31  |
| TCONS_00067230 | 327.25916 | 72.429679 | down | -2.175780683 | 1.16E-25 | 2.13E-25  |
| TCONS_00042644 | 310.72452 | 71.943463 | down | -2.110700601 | 2.22E-23 | 3.69E-23  |
| TCONS_00088946 | 162.29836 | 71.763309 | down | -1.177330136 | 4.15E-05 | 4.51E-05  |
| TCONS_00052861 | 278.01838 | 71.666224 | down | -1.955814999 | 8.30E-19 | 1.17E-18  |
| TCONS_00068938 | 258.88491 | 71.421101 | down | -1.857888578 | 1.53E-16 | 2.01E-16  |

|                |           |           |      |              |          |           |
|----------------|-----------|-----------|------|--------------|----------|-----------|
| TCONS_00027537 | 190.69366 | 71.003233 | down | -1.425300282 | 3.14E-08 | 3.54E-08  |
| TCONS_00091686 | 353.91294 | 70.278889 | down | -2.332231204 | 2.89E-30 | 6.38E-30  |
| TCONS_00004338 | 431.21609 | 69.958816 | down | -2.62383324  | 5.93E-42 | 2.03E-41  |
| TCONS_00001110 | 1605.6502 | 69.914982 | down | -4.521412175 | 0        | 0         |
| TCONS_00045462 | 151.41705 | 68.879204 | down | -1.136387245 | 0.000147 | 0.000158  |
| TCONS_00049955 | 387.64891 | 68.732341 | down | -2.49568961  | 1.00E-35 | 2.73E-35  |
| TCONS_00081290 | 659.82563 | 68.533078 | down | -3.267212427 | 4.93E-79 | 4.10E-78  |
| TCONS_00080540 | 299.82657 | 68.431937 | down | -2.131386564 | 4.62E-23 | 7.63E-23  |
| TCONS_00063679 | 123.3261  | 68.12229  | down | -0.856279326 | 0.018387 | 0.0190971 |
| TCONS_00072710 | 196.70667 | 68.020362 | down | -1.53200729  | 1.57E-09 | 1.80E-09  |
| TCONS_00024466 | 282.67641 | 67.972899 | down | -2.056119905 | 1.15E-20 | 1.74E-20  |
| TCONS_00036128 | 605.3206  | 66.527232 | down | -3.185682541 | 6.15E-71 | 4.33E-70  |
| TCONS_00089386 | 197.54199 | 66.419233 | down | -1.57248636  | 4.32E-10 | 5.02E-10  |
| TCONS_00077082 | 436.25146 | 65.873091 | down | -2.72739879  | 2.85E-44 | 1.06E-43  |
| TCONS_00030969 | 160.32393 | 65.748332 | down | -1.285963601 | 6.72E-06 | 7.35E-06  |
| TCONS_00002886 | 282.10846 | 65.567704 | down | -2.105192623 | 3.95E-21 | 6.04E-21  |
| TCONS_00026011 | 224.77576 | 65.417938 | down | -1.780728293 | 1.09E-13 | 1.35E-13  |
| TCONS_00085485 | 113.63619 | 64.716176 | down | -0.812224145 | 0.036535 | 0.0376311 |
| TCONS_00038334 | 994.50939 | 64.574254 | down | -3.944954006 | 0        | 0         |
| TCONS_00023102 | 163.66401 | 64.574254 | down | -1.341706153 | 1.74E-06 | 1.92E-06  |
| TCONS_00025898 | 191.04334 | 64.158811 | down | -1.574180658 | 1.04E-09 | 1.20E-09  |
| TCONS_00051426 | 381.18977 | 63.580804 | down | -2.583846222 | 1.72E-36 | 4.86E-36  |
| TCONS_00070931 | 470.3491  | 61.610969 | down | -2.932472815 | 2.89E-51 | 1.32E-50  |
| TCONS_00064932 | 343.75762 | 61.432804 | down | -2.484310548 | 6.27E-32 | 1.48E-31  |
| TCONS_00009274 | 261.91533 | 61.377509 | down | -2.093318523 | 7.66E-20 | 1.12E-19  |
| TCONS_00049385 | 126.3759  | 61.32059  | down | -1.04327784  | 0.001609 | 0.0017099 |
| TCONS_00055570 | 353.71917 | 61.157321 | down | -2.53200729  | 1.86E-33 | 4.70E-33  |
| TCONS_00085514 | 532.76876 | 61.037572 | down | -3.125740001 | 7.53E-62 | 4.38E-61  |
| TCONS_00032836 | 439.26904 | 60.916291 | down | -2.850204811 | 9.79E-47 | 3.92E-46  |
| TCONS_00081124 | 212.4538  | 60.85034  | down | -1.803811906 | 4.79E-13 | 5.85E-13  |
| TCONS_00040876 | 644.43933 | 60.775769 | down | -3.406476408 | 4.88E-80 | 4.19E-79  |
| TCONS_00042930 | 155.39089 | 60.401764 | down | -1.363239314 | 1.80E-06 | 1.99E-06  |
| TCONS_00064553 | 217.08458 | 60.322782 | down | -1.847482377 | 5.77E-14 | 7.18E-14  |
| TCONS_00053877 | 176.31311 | 60.153268 | down | -1.551424744 | 7.91E-09 | 8.99E-09  |
| TCONS_00069590 | 154.52909 | 59.750635 | down | -1.370852498 | 1.80E-06 | 1.99E-06  |
| TCONS_00066408 | 383.88812 | 59.221257 | down | -2.696498882 | 7.38E-39 | 2.25E-38  |
| TCONS_00064532 | 385.69576 | 59.180223 | down | -2.704276232 | 3.59E-39 | 1.12E-38  |
| TCONS_00050301 | 264.53449 | 59.173498 | down | -2.160432719 | 6.80E-21 | 1.03E-20  |
| TCONS_00004323 | 302.05655 | 58.962394 | down | -2.356951682 | 2.62E-26 | 4.88E-26  |
| TCONS_00088371 | 343.86219 | 58.905745 | down | -2.54535023  | 1.16E-32 | 2.83E-32  |
| TCONS_00099932 | 910.35671 | 58.66683  | down | -3.955814999 | 0        | 0         |
| TCONS_00043236 | 388.75006 | 58.516846 | down | -2.731918987 | 1.22E-39 | 3.85E-39  |
| TCONS_00055171 | 300.27521 | 58.223858 | down | -2.366603025 | 2.35E-26 | 4.39E-26  |
| TCONS_00050860 | 389.28152 | 58.052039 | down | -2.745395219 | 4.93E-40 | 1.58E-39  |
| TCONS_00007624 | 1706.2753 | 57.369826 | down | -4.894414454 | 0        | 0         |
| TCONS_00089048 | 124.73554 | 57.222724 | down | -1.124212531 | 0.000529 | 0.0005655 |
| TCONS_00049293 | 383.02313 | 56.527007 | down | -2.76041931  | 1.75E-39 | 5.51E-39  |
| TCONS_00062835 | 198.59481 | 55.992128 | down | -1.826531982 | 1.14E-12 | 1.39E-12  |
| TCONS_00068886 | 426.05114 | 55.770705 | down | -2.933447186 | 1.03E-46 | 4.12E-46  |

|                |           |           |      |              |          |           |
|----------------|-----------|-----------|------|--------------|----------|-----------|
| TCONS_00064837 | 297.56621 | 55.478581 | down | -2.423207903 | 4.16E-27 | 8.02E-27  |
| TCONS_00086609 | 142.14287 | 55.387402 | down | -1.359711941 | 4.96E-06 | 5.44E-06  |
| TCONS_00073094 | 125.18444 | 55.197719 | down | -1.1813747   | 0.00026  | 0.0002784 |
| TCONS_00102396 | 330.49501 | 54.733187 | down | -2.594140725 | 5.40E-32 | 1.28E-31  |
| TCONS_00081061 | 488.04491 | 54.698192 | down | -3.15744886  | 3.76E-57 | 1.98E-56  |
| TCONS_00033470 | 218.73045 | 54.564455 | down | -2.003120714 | 1.23E-15 | 1.58E-15  |
| TCONS_00025766 | 276.09715 | 54.398202 | down | -2.343545152 | 3.71E-24 | 6.40E-24  |
| TCONS_00014342 | 485.7976  | 53.905464 | down | -3.171851925 | 2.90E-57 | 1.53E-56  |
| TCONS_00036229 | 454.08517 | 53.905464 | down | -3.074459496 | 4.57E-52 | 2.12E-51  |
| TCONS_00054026 | 610.4642  | 53.646303 | down | -3.508356022 | 1.14E-77 | 9.22E-77  |
| TCONS_00045187 | 816.05641 | 52.88356  | down | -3.94777768  | 0        | 0         |
| TCONS_00009578 | 476.88421 | 52.683811 | down | -3.17820742  | 3.08E-56 | 1.58E-55  |
| TCONS_00081118 | 302.24209 | 52.439757 | down | -2.5269717   | 8.41E-29 | 1.75E-28  |
| TCONS_00083303 | 392.90654 | 52.387001 | down | -2.906905399 | 4.32E-43 | 1.54E-42  |
| TCONS_00066216 | 262.2187  | 51.429806 | down | -2.350093938 | 4.20E-23 | 6.95E-23  |
| TCONS_00019079 | 334.58907 | 50.734555 | down | -2.721349745 | 2.66E-34 | 6.92E-34  |
| TCONS_00069023 | 534.61177 | 50.699191 | down | -3.39845696  | 1.18E-66 | 7.65E-66  |
| TCONS_00101385 | 487.81903 | 50.089148 | down | -3.283776042 | 2.25E-59 | 1.25E-58  |
| TCONS_00067341 | 153.91097 | 49.593027 | down | -1.633886904 | 1.82E-08 | 2.06E-08  |
| TCONS_00102766 | 221.37443 | 49.264597 | down | -2.167865476 | 9.47E-18 | 1.28E-17  |
| TCONS_00031699 | 334.71562 | 48.767727 | down | -2.778937237 | 4.33E-35 | 1.15E-34  |
| TCONS_00066853 | 284.53887 | 48.401603 | down | -2.555499006 | 1.14E-27 | 2.24E-27  |
| TCONS_00055175 | 171.05307 | 47.412072 | down | -1.85111762  | 2.15E-11 | 2.55E-11  |
| TCONS_00060842 | 401.75291 | 47.4051   | down | -3.083194306 | 1.17E-46 | 4.69E-46  |
| TCONS_00089841 | 238.65013 | 47.321591 | down | -2.334326622 | 4.74E-21 | 7.20E-21  |
| TCONS_00055485 | 101.94511 | 47.167281 | down | -1.111934201 | 0.002068 | 0.002195  |
| TCONS_00096752 | 257.38491 | 46.912323 | down | -2.455888602 | 9.34E-24 | 1.59E-23  |
| TCONS_00029132 | 123.63538 | 46.639211 | down | -1.406476408 | 1.25E-05 | 1.36E-05  |
| TCONS_00078916 | 235.14177 | 45.91947  | down | -2.356352929 | 8.47E-21 | 1.28E-20  |
| TCONS_00076775 | 213.27495 | 45.49819  | down | -2.228833494 | 6.94E-18 | 9.43E-18  |
| TCONS_00024950 | 610.61172 | 45.480049 | down | -3.746949569 | 3.75E-82 | 3.34E-81  |
| TCONS_00081273 | 106.65473 | 44.940376 | down | -1.246863781 | 0.000328 | 0.0003511 |
| TCONS_00013052 | 379.99429 | 44.524127 | down | -3.093318523 | 5.94E-44 | 2.18E-43  |
| TCONS_00102526 | 268.11234 | 44.362877 | down | -2.595412756 | 1.52E-26 | 2.87E-26  |
| TCONS_00081346 | 306.4454  | 44.354922 | down | -2.788463941 | 1.68E-32 | 4.06E-32  |
| TCONS_00072546 | 160.1034  | 44.340396 | down | -1.852310423 | 9.54E-11 | 1.12E-10  |
| TCONS_00098731 | 429.95963 | 43.832221 | down | -3.294137532 | 1.48E-52 | 6.94E-52  |
| TCONS_00087601 | 644.67097 | 43.502655 | down | -3.889387637 | 2.38E-88 | 2.42E-87  |
| TCONS_00089318 | 214.7595  | 43.249733 | down | -2.311958809 | 7.53E-19 | 1.06E-18  |
| TCONS_00043438 | 607.89491 | 43.049503 | down | -3.81975345  | 1.24E-82 | 1.11E-81  |
| TCONS_00028768 | 254.30693 | 42.75261  | down | -2.57248636  | 9.32E-25 | 1.64E-24  |
| TCONS_00012403 | 212.54373 | 42.508309 | down | -2.321942898 | 1.49E-18 | 2.08E-18  |
| TCONS_00045932 | 756.40009 | 42.387203 | down | -4.15744886  | 0        | 0         |
| TCONS_00007083 | 659.76236 | 42.193021 | down | -3.966870188 | 0        | 0         |
| TCONS_00023163 | 553.36844 | 41.573886 | down | -3.734490845 | 6.56E-74 | 4.92E-73  |
| TCONS_00064814 | 427.68629 | 41.568499 | down | -3.362990381 | 3.90E-53 | 1.86E-52  |
| TCONS_00036063 | 124.53734 | 41.512021 | down | -1.584977304 | 8.42E-07 | 9.34E-07  |
| TCONS_00041229 | 414.56146 | 41.500441 | down | -3.320387431 | 5.38E-51 | 2.45E-50  |
| TCONS_00058192 | 230.98341 | 41.453138 | down | -2.478236034 | 5.78E-22 | 9.16E-22  |

|                |           |           |      |              |          |           |
|----------------|-----------|-----------|------|--------------|----------|-----------|
| TCONS_00003479 | 519.44954 | 41.327523 | down | -3.651808812 | 1.03E-68 | 6.94E-68  |
| TCONS_00053924 | 203.12534 | 41.14052  | down | -2.303738303 | 9.51E-18 | 1.29E-17  |
| TCONS_00083854 | 893.40817 | 41.012045 | down | -4.44519984  | 0        | 0         |
| TCONS_00013173 | 235.20049 | 40.873374 | down | -2.524657834 | 1.41E-22 | 2.29E-22  |
| TCONS_00012313 | 139.34697 | 40.555046 | down | -1.780728293 | 8.69E-09 | 9.88E-09  |
| TCONS_00078350 | 674.82753 | 40.517179 | down | -4.057913187 | 0        | 0         |
| TCONS_00102471 | 98.28554  | 40.429098 | down | -1.28158516  | 0.000357 | 0.0003829 |
| TCONS_00072868 | 333.32464 | 40.366418 | down | -3.045700503 | 1.73E-38 | 5.21E-38  |
| TCONS_00050816 | 826.26748 | 40.220015 | down | -4.360623366 | 0        | 0         |
| TCONS_00043123 | 371.06915 | 39.601312 | down | -3.228067935 | 1.12E-44 | 4.22E-44  |
| TCONS_00028536 | 282.44988 | 39.524644 | down | -2.837170503 | 2.64E-30 | 5.90E-30  |
| TCONS_00044081 | 446.07479 | 39.11122  | down | -3.511631154 | 1.66E-57 | 8.84E-57  |
| TCONS_00024947 | 177.29941 | 38.896492 | down | -2.188475756 | 1.34E-14 | 1.69E-14  |
| TCONS_00050032 | 542.73082 | 38.593796 | down | -3.813795994 | 1.05E-73 | 7.86E-73  |
| TCONS_00026689 | 135.06742 | 38.213805 | down | -1.821513907 | 4.72E-09 | 5.38E-09  |
| TCONS_00049470 | 755.48871 | 38.013523 | down | -4.312825553 | 0        | 0         |
| TCONS_00090477 | 594.60799 | 37.46726  | down | -3.988236477 | 1.89E-83 | 1.73E-82  |
| TCONS_00044002 | 227.65254 | 37.396134 | down | -2.605872528 | 5.45E-23 | 8.93E-23  |
| TCONS_00068947 | 586.65618 | 37.065043 | down | -3.984384151 | 4.22E-82 | 3.75E-81  |
| TCONS_00071332 | 269.78648 | 37.052262 | down | -2.864184524 | 1.30E-29 | 2.79E-29  |
| TCONS_00057139 | 182.61496 | 36.465461 | down | -2.324202405 | 1.76E-16 | 2.31E-16  |
| TCONS_00043418 | 340.83506 | 36.305291 | down | -3.230822047 | 1.52E-41 | 5.13E-41  |
| TCONS_00010684 | 454.09113 | 35.883178 | down | -3.661602282 | 2.86E-60 | 1.62E-59  |
| TCONS_00055364 | 163.10412 | 35.833112 | down | -2.186427927 | 1.55E-13 | 1.91E-13  |
| TCONS_00040428 | 168.68205 | 35.255707 | down | -2.258377769 | 9.69E-15 | 1.22E-14  |
| TCONS_00081698 | 174.40337 | 35.122541 | down | -2.311958809 | 1.76E-15 | 2.26E-15  |
| TCONS_00030212 | 521.80902 | 35.089406 | down | -3.894414454 | 3.67E-72 | 2.65E-71  |
| TCONS_00074304 | 706.17976 | 35.006843 | down | -4.334326622 | 0        | 0         |
| TCONS_00058876 | 115.43323 | 34.715119 | down | -1.733422578 | 3.12E-07 | 3.48E-07  |
| TCONS_00008170 | 283.15673 | 34.333634 | down | -3.043906329 | 5.81E-33 | 1.43E-32  |
| TCONS_00096750 | 111.29926 | 34.154977 | down | -1.704276232 | 5.67E-07 | 6.30E-07  |
| TCONS_00059386 | 433.58044 | 33.789798 | down | -3.681640036 | 6.78E-58 | 3.64E-57  |
| TCONS_00084779 | 595.48889 | 33.736753 | down | -4.141681544 | 5.57E-85 | 5.23E-84  |
| TCONS_00032995 | 180.75398 | 33.472616 | down | -2.43297421  | 3.11E-17 | 4.16E-17  |
| TCONS_00004191 | 248.66052 | 33.323378 | down | -2.899570888 | 6.70E-28 | 1.33E-27  |
| TCONS_00018851 | 642.51957 | 33.125114 | down | -4.277743094 | 0        | 0         |
| TCONS_00095055 | 377.82363 | 32.862849 | down | -3.52318344  | 4.89E-49 | 2.10E-48  |
| TCONS_00005445 | 916.13675 | 32.203264 | down | -4.830284117 | 0        | 0         |
| TCONS_00072877 | 108.60653 | 31.995501 | down | -1.763169921 | 3.17E-07 | 3.54E-07  |
| TCONS_00094215 | 157.85741 | 31.790402 | down | -2.311958809 | 4.02E-14 | 5.03E-14  |
| TCONS_00081697 | 438.97144 | 31.4322   | down | -3.803811906 | 3.35E-60 | 1.89E-59  |
| TCONS_00081558 | 317.67103 | 31.242292 | down | -3.345961323 | 5.03E-40 | 1.61E-39  |
| TCONS_00081680 | 201.24343 | 31.125331 | down | -2.692780593 | 4.43E-21 | 6.74E-21  |
| TCONS_00057997 | 369.74707 | 30.995642 | down | -3.57640141  | 1.18E-48 | 5.00E-48  |
| TCONS_00074437 | 767.65941 | 30.537578 | down | -4.651808812 | 0        | 0         |
| TCONS_00043585 | 132.78362 | 30.42517  | down | -2.125740001 | 4.10E-11 | 4.84E-11  |
| TCONS_00012855 | 140.39177 | 30.157922 | down | -2.218849405 | 3.93E-12 | 4.72E-12  |
| TCONS_00016549 | 169.75475 | 29.835377 | down | -2.508356022 | 1.22E-16 | 1.61E-16  |
| TCONS_00004543 | 401.44102 | 29.287221 | down | -3.776844858 | 8.27E-55 | 4.16E-54  |

|                |           |           |      |              |          |           |
|----------------|-----------|-----------|------|--------------|----------|-----------|
| TCONS_00006189 | 461.16707 | 29.172369 | down | -3.982615058 | 6.63E-65 | 4.12E-64  |
| TCONS_00101095 | 393.72575 | 28.833155 | down | -3.771390428 | 1.24E-53 | 5.98E-53  |
| TCONS_00014713 | 578.94753 | 28.699669 | down | -4.334326622 | 7.21E-85 | 6.75E-84  |
| TCONS_00085199 | 1278.2584 | 27.924002 | down | -5.516529954 | 0        | 0         |
| TCONS_00101917 | 269.20063 | 27.757291 | down | -3.277743094 | 2.58E-33 | 6.42E-33  |
| TCONS_00053314 | 287.26984 | 27.504665 | down | -3.384658298 | 2.79E-36 | 7.77E-36  |
| TCONS_00065205 | 114.19451 | 27.44081  | down | -2.057098335 | 2.51E-09 | 2.87E-09  |
| TCONS_00064981 | 87.255945 | 27.429772 | down | -1.669510814 | 1.16E-05 | 1.27E-05  |
| TCONS_00054591 | 134.38918 | 27.349096 | down | -2.296851917 | 3.00E-12 | 3.62E-12  |
| TCONS_00080929 | 532.39645 | 27.29176  | down | -4.285963601 | 6.03E-78 | 4.92E-77  |
| TCONS_00026498 | 431.82139 | 27.149467 | down | -3.991438909 | 5.02E-61 | 2.90E-60  |
| TCONS_00012391 | 212.39995 | 27.149467 | down | -2.967787641 | 1.86E-24 | 3.26E-24  |
| TCONS_00019025 | 331.9751  | 26.952732 | down | -3.622571591 | 3.15E-44 | 1.17E-43  |
| TCONS_00012992 | 191.02426 | 26.37927  | down | -2.856279326 | 1.70E-21 | 2.63E-21  |
| TCONS_00067454 | 586.20873 | 26.122745 | down | -4.488036038 | 1.21E-87 | 1.20E-86  |
| TCONS_00070440 | 64.248551 | 25.302565 | down | -1.344380287 | 0.00239  | 0.0025343 |
| TCONS_00008636 | 73.995661 | 24.796514 | down | -1.577303376 | 0.000162 | 0.0001748 |
| TCONS_00008272 | 337.90653 | 24.585778 | down | -3.780728293 | 3.33E-46 | 1.32E-45  |
| TCONS_00055053 | 266.97113 | 24.578042 | down | -3.441241826 | 2.35E-34 | 6.12E-34  |
| TCONS_00032407 | 85.717745 | 24.551004 | down | -1.803811906 | 4.81E-06 | 5.28E-06  |
| TCONS_00019296 | 318.21503 | 24.457866 | down | -3.701631511 | 2.44E-43 | 8.72E-43  |
| TCONS_00036691 | 237.00059 | 23.957984 | down | -3.306312246 | 7.47E-30 | 1.62E-29  |
| TCONS_00003649 | 499.29453 | 23.615727 | down | -4.402071229 | 6.35E-74 | 4.77E-73  |
| TCONS_00010161 | 893.65747 | 22.959735 | down | -5.28254408  | 0        | 0         |
| TCONS_00081153 | 122.06876 | 22.860126 | down | -2.416788783 | 7.80E-12 | 9.31E-12  |
| TCONS_00033323 | 454.25114 | 22.139744 | down | -4.358779666 | 2.45E-67 | 1.61E-66  |
| TCONS_00044590 | 171.77564 | 22.139744 | down | -2.955814999 | 4.19E-20 | 6.20E-20  |
| TCONS_00083299 | 76.887143 | 22.021771 | down | -1.803811906 | 1.19E-05 | 1.30E-05  |
| TCONS_00010597 | 339.9777  | 21.982725 | down | -3.950997983 | 4.94E-48 | 2.06E-47  |
| TCONS_00072879 | 205.37571 | 21.409863 | down | -3.261918127 | 6.17E-26 | 1.14E-25  |
| TCONS_00050814 | 635.21133 | 21.173494 | down | -4.906905399 | 0        | 0         |
| TCONS_00022550 | 879.86649 | 21.157435 | down | -5.378048    | 0        | 0         |
| TCONS_00014470 | 466.19792 | 21.157435 | down | -4.461705929 | 6.60E-70 | 4.55E-69  |
| TCONS_00087148 | 141.70274 | 21.073524 | down | -2.749364122 | 1.05E-15 | 1.36E-15  |
| TCONS_00073693 | 286.95266 | 21.013995 | down | -3.771390428 | 1.32E-39 | 4.16E-39  |
| TCONS_00040229 | 816.43952 | 20.837406 | down | -5.292098387 | 0        | 0         |
| TCONS_00034831 | 155.71553 | 20.6325   | down | -2.915922272 | 6.09E-18 | 8.27E-18  |
| TCONS_00092124 | 685.07422 | 20.587511 | down | -5.05641894  | 0        | 0         |
| TCONS_00081073 | 128.69355 | 19.946391 | down | -2.689740139 | 4.86E-14 | 6.05E-14  |
| TCONS_00072934 | 459.16774 | 19.837211 | down | -4.532740181 | 3.00E-69 | 2.04E-68  |
| TCONS_00046225 | 809.85765 | 19.601987 | down | -5.368596524 | 0        | 0         |
| TCONS_00008412 | 192.76669 | 19.486455 | down | -3.306312246 | 7.27E-25 | 1.29E-24  |
| TCONS_00013139 | 90.006418 | 19.334514 | down | -2.218849405 | 2.12E-08 | 2.39E-08  |
| TCONS_00027915 | 385.37492 | 19.251952 | down | -4.323186065 | 3.37E-57 | 1.78E-56  |
| TCONS_00063465 | 580.14124 | 19.172562 | down | -4.919289123 | 0        | 0         |
| TCONS_00023020 | 241.72552 | 19.172562 | down | -3.656254717 | 4.93E-33 | 1.21E-32  |
| TCONS_00049978 | 145.03149 | 19.074241 | down | -2.926668653 | 5.30E-17 | 7.05E-17  |
| TCONS_00031654 | 44.397396 | 19.074241 | down | -1.218849405 | 0.026127 | 0.0269567 |
| TCONS_00068371 | 272.4459  | 18.908017 | down | -3.848899795 | 4.49E-38 | 1.33E-37  |

|                |           |           |      |              |          |           |
|----------------|-----------|-----------|------|--------------|----------|-----------|
| TCONS_00100912 | 50.372046 | 18.848701 | down | -1.418158213 | 0.005664 | 0.0059712 |
| TCONS_00074876 | 110.43461 | 18.728485 | down | -2.559886323 | 1.91E-11 | 2.26E-11  |
| TCONS_00087699 | 125.62696 | 18.504861 | down | -2.763169921 | 5.85E-14 | 7.28E-14  |
| TCONS_00004308 | 463.41808 | 18.099645 | down | -4.678281024 | 5.22E-71 | 3.69E-70  |
| TCONS_00023441 | 554.05231 | 17.524038 | down | -4.982615058 | 1.56E-86 | 1.52E-85  |
| TCONS_00085419 | 114.1289  | 17.511662 | down | -2.704276232 | 1.88E-12 | 2.27E-12  |
| TCONS_00017151 | 794.84541 | 17.462334 | down | -5.508356022 | 0        | 0         |
| TCONS_00018165 | 433.8177  | 17.364505 | down | -4.642875687 | 1.32E-66 | 8.52E-66  |
| TCONS_00013360 | 195.49893 | 17.180033 | down | -3.508356022 | 3.95E-26 | 7.35E-26  |
| TCONS_00053343 | 1020.7891 | 17.02632  | down | -5.905774317 | 0        | 0         |
| TCONS_00083856 | 546.87181 | 16.4803   | down | -5.052388259 | 1.90E-86 | 1.84E-85  |
| TCONS_00046728 | 324.87805 | 16.356539 | down | -4.311958809 | 1.39E-48 | 5.86E-48  |
| TCONS_00039913 | 168.1863  | 15.861309 | down | -3.406476408 | 4.22E-22 | 6.70E-22  |
| TCONS_00010237 | 381.72365 | 15.743818 | down | -4.599671189 | 2.76E-58 | 1.50E-57  |
| TCONS_00008966 | 884.82575 | 15.693996 | down | -5.817108728 | 0        | 0         |
| TCONS_00097946 | 243.53002 | 15.693996 | down | -3.955814999 | 7.47E-35 | 1.97E-34  |
| TCONS_00019442 | 1119.2425 | 15.595292 | down | -6.165268365 | 0        | 0         |
| TCONS_00059875 | 155.02397 | 15.36974  | down | -3.334326622 | 2.10E-20 | 3.14E-20  |
| TCONS_00048348 | 928.97375 | 14.997891 | down | -5.952806249 | 0        | 0         |
| TCONS_00037062 | 92.052018 | 14.830451 | down | -2.633886904 | 3.81E-10 | 4.42E-10  |
| TCONS_00081480 | 313.01339 | 14.75983  | down | -4.406476408 | 4.52E-47 | 1.83E-46  |
| TCONS_00009162 | 620.82884 | 14.65515  | down | -5.40471595  | 0        | 0         |
| TCONS_00089152 | 136.33846 | 14.64361  | down | -3.218849405 | 2.92E-17 | 3.91E-17  |
| TCONS_00068949 | 196.12442 | 14.444571 | down | -3.763169921 | 9.42E-28 | 1.86E-27  |
| TCONS_00032857 | 370.83622 | 14.374791 | down | -4.68916934  | 1.71E-57 | 9.13E-57  |
| TCONS_00074817 | 490.47247 | 13.775841 | down | -5.153959874 | 8.03E-78 | 6.52E-77  |
| TCONS_00007587 | 84.33478  | 13.587131 | down | -2.633886904 | 2.86E-09 | 3.27E-09  |
| TCONS_00095129 | 360.30396 | 13.143028 | down | -4.776844858 | 3.68E-56 | 1.89E-55  |
| TCONS_00024949 | 91.131498 | 13.050797 | down | -2.803811906 | 8.86E-11 | 1.04E-10  |
| TCONS_00040657 | 154.94393 | 12.481467 | down | -3.633886904 | 7.88E-22 | 1.23E-21  |
| TCONS_00061575 | 45.191981 | 12.481467 | down | -1.856279326 | 0.000464 | 0.0004962 |
| TCONS_00003494 | 541.89489 | 12.398257 | down | -5.44980384  | 7.59E-88 | 7.64E-87  |
| TCONS_00014749 | 467.22974 | 11.807864 | down | -5.306312246 | 5.21E-75 | 4.02E-74  |
| TCONS_00045075 | 793.26154 | 11.751902 | down | -6.0768304   | 0        | 0         |
| TCONS_00089282 | 128.71076 | 11.641556 | down | -3.466776918 | 1.81E-17 | 2.43E-17  |
| TCONS_00101489 | 385.1357  | 11.544001 | down | -5.060151659 | 5.53E-61 | 3.17E-60  |
| TCONS_00004320 | 1002.9153 | 11.479867 | down | -6.448949921 | 0        | 0         |
| TCONS_00000958 | 52.789587 | 11.339869 | down | -2.218849405 | 1.48E-05 | 1.61E-05  |
| TCONS_00083853 | 289.90081 | 11.322609 | down | -4.678281024 | 2.68E-45 | 1.03E-44  |
| TCONS_00028522 | 439.62128 | 11.220142 | down | -5.292098387 | 5.93E-71 | 4.19E-70  |
| TCONS_00084666 | 199.81024 | 11.037024 | down | -4.17820742  | 5.93E-30 | 1.29E-29  |
| TCONS_00079190 | 102.37981 | 10.996237 | down | -3.218849405 | 1.95E-13 | 2.40E-13  |
| TCONS_00041802 | 1085.3788 | 10.971909 | down | -6.628240341 | 0        | 0         |
| TCONS_00046099 | 489.48457 | 10.971909 | down | -5.479376955 | 2.43E-79 | 2.05E-78  |
| TCONS_00097855 | 241.54531 | 10.923574 | down | -4.466776918 | 4.17E-37 | 1.20E-36  |
| TCONS_00067653 | 624.63869 | 10.734421 | down | -5.862705595 | 0        | 0         |
| TCONS_00068197 | 187.39161 | 10.734421 | down | -4.125740001 | 9.59E-28 | 1.90E-27  |
| TCONS_00059329 | 446.69087 | 10.711237 | down | -5.382079754 | 3.76E-72 | 2.71E-71  |
| TCONS_00054255 | 163.69208 | 10.418703 | down | -3.973736907 | 2.37E-24 | 4.11E-24  |

|                |           |           |      |              |          |           |
|----------------|-----------|-----------|------|--------------|----------|-----------|
| TCONS_00033469 | 115.75255 | 10.28901  | down | -3.491867899 | 3.08E-16 | 4.01E-16  |
| TCONS_00092416 | 128.60208 | 9.9451258 | down | -3.692780593 | 2.00E-18 | 2.78E-18  |
| TCONS_00030138 | 205.21463 | 9.9186054 | down | -4.370852498 | 2.49E-31 | 5.77E-31  |
| TCONS_00032885 | 291.88262 | 9.8139236 | down | -4.894414454 | 3.46E-46 | 1.36E-45  |
| TCONS_00102157 | 784.50999 | 9.8009935 | down | -6.322720003 | 0        | 0         |
| TCONS_00034332 | 596.55416 | 9.6110518 | down | -5.955814999 | 0        | 0         |
| TCONS_00054834 | 377.37787 | 9.5371206 | down | -5.306312246 | 9.86E-61 | 5.63E-60  |
| TCONS_00061596 | 306.74222 | 9.4884618 | down | -5.014708688 | 2.61E-49 | 1.13E-48  |
| TCONS_00090816 | 390.25469 | 8.8243821 | down | -5.466776918 | 1.59E-63 | 9.67E-63  |
| TCONS_00097294 | 579.23485 | 8.3321618 | down | -6.119313731 | 0        | 0         |
| TCONS_00035906 | 431.50642 | 8.1388994 | down | -5.728404503 | 2.71E-71 | 1.93E-70  |
| TCONS_00031677 | 112.0711  | 8.0247617 | down | -3.803811906 | 1.54E-16 | 2.02E-16  |
| TCONS_00089202 | 107.22301 | 7.8969789 | down | -3.763169921 | 1.08E-15 | 1.40E-15  |
| TCONS_00094576 | 648.08911 | 7.880248  | down | -6.361807359 | 0        | 0         |
| TCONS_00078346 | 414.00104 | 7.846998  | down | -5.721349745 | 3.30E-68 | 2.20E-67  |
| TCONS_00069923 | 230.48549 | 7.3653011 | down | -4.967787641 | 3.10E-37 | 9.00E-37  |
| TCONS_00064789 | 28.54432  | 7.3580159 | down | -1.955814999 | 0.002918 | 0.0030853 |
| TCONS_00032269 | 173.68426 | 6.8879204 | down | -4.656254717 | 1.22E-27 | 2.40E-27  |
| TCONS_00050658 | 358.09579 | 6.7873669 | down | -5.721349745 | 3.50E-59 | 1.93E-58  |
| TCONS_00030728 | 428.29804 | 6.6776967 | down | -6.003120714 | 3.48E-71 | 2.47E-70  |
| TCONS_00102050 | 197.79859 | 6.5368665 | down | -4.919289123 | 9.43E-32 | 2.22E-31  |
| TCONS_00016012 | 323.41207 | 6.4128915 | down | -5.656254717 | 9.39E-54 | 4.57E-53  |
| TCONS_00085936 | 222.17479 | 6.2935314 | down | -5.141681544 | 2.01E-36 | 5.65E-36  |
| TCONS_00024464 | 90.521668 | 6.2224626 | down | -3.862705595 | 5.66E-14 | 7.04E-14  |
| TCONS_00033396 | 533.35486 | 6.1377509 | down | -6.441241826 | 0        | 0         |
| TCONS_00044448 | 189.07982 | 6.0925095 | down | -4.955814999 | 9.22E-31 | 2.09E-30  |
| TCONS_00023667 | 663.08733 | 6.0185713 | down | -6.783634024 | 0        | 0         |
| TCONS_00029016 | 282.10846 | 5.9607004 | down | -5.564624242 | 1.02E-46 | 4.07E-46  |
| TCONS_00070670 | 245.11063 | 5.9607004 | down | -5.361807359 | 2.27E-40 | 7.36E-40  |
| TCONS_00100017 | 93.01813  | 5.8482343 | down | -3.991438909 | 2.58E-14 | 3.22E-14  |
| TCONS_00055343 | 270.97002 | 5.8207778 | down | -5.5407775   | 7.85E-45 | 2.96E-44  |
| TCONS_00034079 | 147.64716 | 5.7666311 | down | -4.678281024 | 9.92E-24 | 1.68E-23  |
| TCONS_00010846 | 75.244054 | 5.7047194 | down | -3.721349745 | 3.00E-11 | 3.55E-11  |
| TCONS_00048287 | 196.76119 | 5.6355713 | down | -5.125740001 | 3.91E-32 | 9.31E-32  |
| TCONS_00045083 | 480.97179 | 5.5103364 | down | -6.447668095 | 7.42E-81 | 6.47E-80  |
| TCONS_00063173 | 612.91981 | 5.4859543 | down | -6.803811906 | 0        | 0         |
| TCONS_00032619 | 140.46079 | 5.4859543 | down | -4.678281024 | 6.64E-23 | 1.09E-22  |
| TCONS_00060846 | 177.98075 | 5.4617871 | down | -5.026204327 | 1.97E-29 | 4.20E-29  |
| TCONS_00057336 | 137.11915 | 5.4378319 | down | -4.656254717 | 2.18E-22 | 3.50E-22  |
| TCONS_00041143 | 704.87246 | 5.3440762 | down | -7.04327784  | 0        | 0         |
| TCONS_00043935 | 289.39828 | 5.2534986 | down | -5.783634024 | 1.70E-48 | 7.14E-48  |
| TCONS_00058414 | 57.06445  | 5.2534986 | down | -3.441241826 | 1.12E-08 | 1.28E-08  |
| TCONS_00002425 | 526.49587 | 5.1021633 | down | -6.68916934  | 0        | 0         |
| TCONS_00081804 | 44.568815 | 4.7869717 | down | -3.218849405 | 1.22E-06 | 1.35E-06  |
| TCONS_00095456 | 1048.7355 | 4.6609988 | down | -7.813795994 | 0        | 0         |
| TCONS_00078792 | 97.275194 | 4.6435419 | down | -4.388774406 | 1.61E-15 | 2.07E-15  |
| TCONS_00087595 | 173.43593 | 4.6090174 | down | -5.233799746 | 1.42E-28 | 2.92E-28  |
| TCONS_00052996 | 693.16523 | 4.5581826 | down | -7.248596748 | 0        | 0         |
| TCONS_00050182 | 526.61145 | 4.5249112 | down | -6.862705595 | 0        | 0         |

|                |           |           |      |              |          |           |
|----------------|-----------|-----------|------|--------------|----------|-----------|
| TCONS_00026456 | 90.235416 | 4.3887635 | down | -4.361807359 | 7.51E-15 | 9.50E-15  |
| TCONS_00039799 | 479.27225 | 4.3810095 | down | -6.773438257 | 1.09E-81 | 9.59E-81  |
| TCONS_00051519 | 674.99092 | 4.2027989 | down | -7.327373862 | 0        | 0         |
| TCONS_00021997 | 427.53048 | 4.0517179 | down | -6.721349745 | 6.12E-73 | 4.49E-72  |
| TCONS_00102491 | 40.866884 | 4.0517179 | down | -3.334326622 | 2E-06    | 2.20E-06  |
| TCONS_00097735 | 722.23596 | 4.0123808 | down | -7.491867899 | 0        | 0         |
| TCONS_00033509 | 157.79516 | 3.911122  | down | -5.334326622 | 1.47E-26 | 2.78E-26  |
| TCONS_00063930 | 146.44514 | 3.7009722 | down | -5.306312246 | 1.71E-24 | 2.99E-24  |
| TCONS_00054855 | 283.42981 | 3.6899574 | down | -6.263243524 | 4.79E-48 | 2.00E-47  |
| TCONS_00024296 | 740.16985 | 3.5729847 | down | -7.694582836 | 0        | 0         |
| TCONS_00047258 | 311.53855 | 3.522232  | down | -6.466776918 | 5.00E-53 | 2.37E-52  |
| TCONS_00061079 | 58.622601 | 3.4344202 | down | -4.093318523 | 4.90E-10 | 5.68E-10  |
| TCONS_00096126 | 76.428395 | 3.3967827 | down | -4.491867899 | 5.59E-13 | 6.80E-13  |
| TCONS_00020878 | 54.303267 | 3.3328647 | down | -4.026204327 | 3.60E-09 | 4.11E-09  |
| TCONS_00071588 | 296.52145 | 3.0092856 | down | -6.622571591 | 4.87E-51 | 2.22E-50  |
| TCONS_00082893 | 329.942   | 2.994748  | down | -6.783634024 | 1.04E-56 | 5.43E-56  |
| TCONS_00080492 | 403.69335 | 2.9732031 | down | -7.085098016 | 2.06E-69 | 1.41E-68  |
| TCONS_00066500 | 295.98264 | 2.8900366 | down | -6.678281024 | 7.24E-51 | 3.27E-50  |
| TCONS_00021121 | 294.47253 | 2.8113961 | down | -6.710702501 | 1.60E-50 | 7.17E-50  |
| TCONS_00101918 | 289.17323 | 2.5354308 | down | -6.833559249 | 1.15E-49 | 5.04E-49  |
| TCONS_00085338 | 596.86861 | 2.4896098 | down | -7.905349932 | 0        | 0         |
| TCONS_00090493 | 171.12295 | 2.1413224 | down | -6.320387431 | 5.91E-30 | 1.29E-29  |
| TCONS_00047390 | 59.196528 | 2.1193601 | down | -4.803811906 | 1.39E-10 | 1.62E-10  |
| TCONS_00005188 | 1067.4268 | 2.0291746 | down | -9.039028367 | 0        | 0         |
| TCONS_00044439 | 23.197996 | 1.9932889 | down | -3.5407775   | 0.00028  | 0.0003007 |
| TCONS_00001517 | 476.43432 | 1.9494114 | down | -7.933094923 | 2.28E-82 | 2.04E-81  |
| TCONS_00064673 | 99.561893 | 1.8871015 | down | -5.721349745 | 1.07E-17 | 1.44E-17  |
| TCONS_00084688 | 222.42569 | 1.2251242 | down | -7.504251624 | 2.47E-39 | 7.77E-39  |
| TCONS_00055883 | 1734.4134 | 0         | down | #NAME?       | 0        | 0         |
| TCONS_00093418 | 1623.2798 | 0         | down | #NAME?       | 0        | 0         |
| TCONS_00041247 | 1440.7192 | 0         | down | #NAME?       | 0        | 0         |
| TCONS_00069775 | 1432.4918 | 0         | down | #NAME?       | 0        | 0         |
| TCONS_00037294 | 1370.6124 | 0         | down | #NAME?       | 0        | 0         |
| TCONS_00044440 | 1363.8825 | 0         | down | #NAME?       | 0        | 0         |
| TCONS_00024043 | 1347.6504 | 0         | down | #NAME?       | 0        | 0         |
| TCONS_00097055 | 1310.5378 | 0         | down | #NAME?       | 0        | 0         |
| TCONS_00049175 | 1308.5899 | 0         | down | #NAME?       | 0        | 0         |
| TCONS_00016010 | 1190.9778 | 0         | down | #NAME?       | 0        | 0         |
| TCONS_00024686 | 1165.9922 | 0         | down | #NAME?       | 0        | 0         |
| TCONS_00083323 | 1140.6446 | 0         | down | #NAME?       | 0        | 0         |
| TCONS_00036025 | 1110.8637 | 0         | down | #NAME?       | 0        | 0         |
| TCONS_00047407 | 1106.6608 | 0         | down | #NAME?       | 0        | 0         |
| TCONS_00096031 | 1057.1855 | 0         | down | #NAME?       | 0        | 0         |
| TCONS_00004716 | 1015.8844 | 0         | down | #NAME?       | 0        | 0         |
| TCONS_00086846 | 1007.3897 | 0         | down | #NAME?       | 0        | 0         |
| TCONS_00047862 | 948.94435 | 0         | down | #NAME?       | 0        | 0         |
| TCONS_00007997 | 940.47163 | 0         | down | #NAME?       | 0        | 0         |
| TCONS_00006281 | 914.78949 | 0         | down | #NAME?       | 0        | 0         |
| TCONS_00017152 | 909.94664 | 0         | down | #NAME?       | 0        | 0         |



|                |           |        |        |   |   |
|----------------|-----------|--------|--------|---|---|
| TCONS_00025096 | 903.04908 | 0 down | #NAME? | 0 | 0 |
| TCONS_00047499 | 898.98001 | 0 down | #NAME? | 0 | 0 |
| TCONS_00063483 | 877.89026 | 0 down | #NAME? | 0 | 0 |
| TCONS_00004435 | 873.39648 | 0 down | #NAME? | 0 | 0 |
| TCONS_00090904 | 873.02443 | 0 down | #NAME? | 0 | 0 |
| TCONS_00079123 | 870.18897 | 0 down | #NAME? | 0 | 0 |
| TCONS_00073416 | 869.09189 | 0 down | #NAME? | 0 | 0 |
| TCONS_00071136 | 868.55101 | 0 down | #NAME? | 0 | 0 |
| TCONS_00031549 | 862.0014  | 0 down | #NAME? | 0 | 0 |
| TCONS_00028174 | 861.93955 | 0 down | #NAME? | 0 | 0 |
| TCONS_00083857 | 852.77226 | 0 down | #NAME? | 0 | 0 |
| TCONS_00051175 | 852.41536 | 0 down | #NAME? | 0 | 0 |
| TCONS_00060145 | 852.41536 | 0 down | #NAME? | 0 | 0 |
| TCONS_00080558 | 848.77375 | 0 down | #NAME? | 0 | 0 |
| TCONS_00031360 | 846.32537 | 0 down | #NAME? | 0 | 0 |
| TCONS_00051150 | 842.89116 | 0 down | #NAME? | 0 | 0 |
| TCONS_00068385 | 823.90684 | 0 down | #NAME? | 0 | 0 |
| TCONS_00045656 | 823.84278 | 0 down | #NAME? | 0 | 0 |
| TCONS_00059735 | 823.84278 | 0 down | #NAME? | 0 | 0 |
| TCONS_00068731 | 823.23072 | 0 down | #NAME? | 0 | 0 |
| TCONS_00032123 | 817.18509 | 0 down | #NAME? | 0 | 0 |
| TCONS_00067815 | 813.433   | 0 down | #NAME? | 0 | 0 |
| TCONS_00047000 | 811.05048 | 0 down | #NAME? | 0 | 0 |
| TCONS_00008090 | 810.30716 | 0 down | #NAME? | 0 | 0 |
| TCONS_00010782 | 805.56852 | 0 down | #NAME? | 0 | 0 |
| TCONS_00073583 | 804.79439 | 0 down | #NAME? | 0 | 0 |
| TCONS_00068272 | 804.70281 | 0 down | #NAME? | 0 | 0 |
| TCONS_00049330 | 804.31418 | 0 down | #NAME? | 0 | 0 |
| TCONS_00056783 | 795.27019 | 0 down | #NAME? | 0 | 0 |
| TCONS_00028512 | 793.83694 | 0 down | #NAME? | 0 | 0 |
| TCONS_00085070 | 793.83694 | 0 down | #NAME? | 0 | 0 |
| TCONS_00004523 | 790.82862 | 0 down | #NAME? | 0 | 0 |
| TCONS_00048321 | 790.5081  | 0 down | #NAME? | 0 | 0 |
| TCONS_00047213 | 783.29692 | 0 down | #NAME? | 0 | 0 |
| TCONS_00009991 | 783.08975 | 0 down | #NAME? | 0 | 0 |
| TCONS_00050050 | 782.97734 | 0 down | #NAME? | 0 | 0 |
| TCONS_00085889 | 779.82805 | 0 down | #NAME? | 0 | 0 |
| TCONS_00057351 | 777.29807 | 0 down | #NAME? | 0 | 0 |
| TCONS_00000782 | 777.13669 | 0 down | #NAME? | 0 | 0 |
| TCONS_00001807 | 774.24728 | 0 down | #NAME? | 0 | 0 |
| TCONS_00070181 | 773.3272  | 0 down | #NAME? | 0 | 0 |
| TCONS_00056197 | 771.45971 | 0 down | #NAME? | 0 | 0 |
| TCONS_00068290 | 771.45971 | 0 down | #NAME? | 0 | 0 |
| TCONS_00057329 | 771.09706 | 0 down | #NAME? | 0 | 0 |
| TCONS_00070840 | 768.61179 | 0 down | #NAME? | 0 | 0 |
| TCONS_00098421 | 767.70498 | 0 down | #NAME? | 0 | 0 |
| TCONS_00082785 | 767.06709 | 0 down | #NAME? | 0 | 0 |
| TCONS_00002401 | 761.93552 | 0 down | #NAME? | 0 | 0 |
| TCONS_00024948 | 761.23271 | 0 down | #NAME? | 0 | 0 |

|                |           |        |        |   |   |
|----------------|-----------|--------|--------|---|---|
| TCONS_00085131 | 761.14954 | 0 down | #NAME? | 0 | 0 |
| TCONS_00047675 | 757.08523 | 0 down | #NAME? | 0 | 0 |
| TCONS_00027728 | 754.06595 | 0 down | #NAME? | 0 | 0 |
| TCONS_00039219 | 753.4435  | 0 down | #NAME? | 0 | 0 |
| TCONS_00014346 | 753.18136 | 0 down | #NAME? | 0 | 0 |
| TCONS_00098570 | 752.41132 | 0 down | #NAME? | 0 | 0 |
| TCONS_00088213 | 750.22395 | 0 down | #NAME? | 0 | 0 |
| TCONS_00044819 | 748.68251 | 0 down | #NAME? | 0 | 0 |
| TCONS_00002925 | 747.64922 | 0 down | #NAME? | 0 | 0 |
| TCONS_00040446 | 747.64922 | 0 down | #NAME? | 0 | 0 |
| TCONS_00054015 | 746.09283 | 0 down | #NAME? | 0 | 0 |
| TCONS_00004525 | 743.53128 | 0 down | #NAME? | 0 | 0 |
| TCONS_00097228 | 743.32005 | 0 down | #NAME? | 0 | 0 |
| TCONS_00069146 | 742.47102 | 0 down | #NAME? | 0 | 0 |
| TCONS_00042817 | 741.83785 | 0 down | #NAME? | 0 | 0 |
| TCONS_00094370 | 740.31933 | 0 down | #NAME? | 0 | 0 |
| TCONS_00003543 | 739.22758 | 0 down | #NAME? | 0 | 0 |
| TCONS_00033518 | 739.22758 | 0 down | #NAME? | 0 | 0 |
| TCONS_00063482 | 738.55384 | 0 down | #NAME? | 0 | 0 |
| TCONS_00045788 | 735.92819 | 0 down | #NAME? | 0 | 0 |
| TCONS_00041728 | 735.60392 | 0 down | #NAME? | 0 | 0 |
| TCONS_00083318 | 734.73605 | 0 down | #NAME? | 0 | 0 |
| TCONS_00040953 | 734.6489  | 0 down | #NAME? | 0 | 0 |
| TCONS_00063478 | 733.36293 | 0 down | #NAME? | 0 | 0 |
| TCONS_00074773 | 732.35584 | 0 down | #NAME? | 0 | 0 |
| TCONS_00067232 | 731.99691 | 0 down | #NAME? | 0 | 0 |
| TCONS_00080384 | 729.27131 | 0 down | #NAME? | 0 | 0 |
| TCONS_00044716 | 726.1731  | 0 down | #NAME? | 0 | 0 |
| TCONS_00047869 | 721.45769 | 0 down | #NAME? | 0 | 0 |
| TCONS_00083184 | 721.45769 | 0 down | #NAME? | 0 | 0 |
| TCONS_00036677 | 720.29592 | 0 down | #NAME? | 0 | 0 |
| TCONS_00090321 | 719.07664 | 0 down | #NAME? | 0 | 0 |
| TCONS_00038855 | 718.36131 | 0 down | #NAME? | 0 | 0 |
| TCONS_00048013 | 717.00425 | 0 down | #NAME? | 0 | 0 |
| TCONS_00062699 | 716.95421 | 0 down | #NAME? | 0 | 0 |
| TCONS_00034417 | 715.53439 | 0 down | #NAME? | 0 | 0 |
| TCONS_00061879 | 715.53439 | 0 down | #NAME? | 0 | 0 |
| TCONS_00005097 | 714.58667 | 0 down | #NAME? | 0 | 0 |
| TCONS_00074484 | 714.31455 | 0 down | #NAME? | 0 | 0 |
| TCONS_00007366 | 713.5544  | 0 down | #NAME? | 0 | 0 |
| TCONS_00040698 | 710.79575 | 0 down | #NAME? | 0 | 0 |
| TCONS_00005927 | 709.55245 | 0 down | #NAME? | 0 | 0 |
| TCONS_00053438 | 707.31146 | 0 down | #NAME? | 0 | 0 |
| TCONS_00033906 | 706.14585 | 0 down | #NAME? | 0 | 0 |
| TCONS_00010149 | 706.05712 | 0 down | #NAME? | 0 | 0 |
| TCONS_00075874 | 703.30781 | 0 down | #NAME? | 0 | 0 |
| TCONS_00095830 | 702.95878 | 0 down | #NAME? | 0 | 0 |
| TCONS_00056662 | 700.02825 | 0 down | #NAME? | 0 | 0 |
| TCONS_00090358 | 697.88064 | 0 down | #NAME? | 0 | 0 |

|                |           |        |        |   |   |
|----------------|-----------|--------|--------|---|---|
| TCONS_00053391 | 697.52308 | 0 down | #NAME? | 0 | 0 |
| TCONS_00076463 | 697.50491 | 0 down | #NAME? | 0 | 0 |
| TCONS_00034520 | 696.26393 | 0 down | #NAME? | 0 | 0 |
| TCONS_00016992 | 695.77473 | 0 down | #NAME? | 0 | 0 |
| TCONS_00083142 | 695.26616 | 0 down | #NAME? | 0 | 0 |
| TCONS_00060409 | 694.99274 | 0 down | #NAME? | 0 | 0 |
| TCONS_00025058 | 694.49739 | 0 down | #NAME? | 0 | 0 |
| TCONS_00022723 | 693.70932 | 0 down | #NAME? | 0 | 0 |
| TCONS_00078761 | 693.16523 | 0 down | #NAME? | 0 | 0 |
| TCONS_00095994 | 693.16523 | 0 down | #NAME? | 0 | 0 |
| TCONS_00044981 | 691.8412  | 0 down | #NAME? | 0 | 0 |
| TCONS_00005902 | 691.68325 | 0 down | #NAME? | 0 | 0 |
| TCONS_00046680 | 690.85039 | 0 down | #NAME? | 0 | 0 |
| TCONS_00058805 | 688.40513 | 0 down | #NAME? | 0 | 0 |
| TCONS_00063655 | 687.55312 | 0 down | #NAME? | 0 | 0 |
| TCONS_00058296 | 686.43547 | 0 down | #NAME? | 0 | 0 |
| TCONS_00021114 | 686.03729 | 0 down | #NAME? | 0 | 0 |
| TCONS_00021658 | 685.74196 | 0 down | #NAME? | 0 | 0 |
| TCONS_00041750 | 683.95072 | 0 down | #NAME? | 0 | 0 |
| TCONS_00099496 | 683.73441 | 0 down | #NAME? | 0 | 0 |
| TCONS_00037743 | 682.36392 | 0 down | #NAME? | 0 | 0 |
| TCONS_00016778 | 681.76584 | 0 down | #NAME? | 0 | 0 |
| TCONS_00011546 | 681.20469 | 0 down | #NAME? | 0 | 0 |
| TCONS_00063179 | 679.019   | 0 down | #NAME? | 0 | 0 |
| TCONS_00005890 | 678.47229 | 0 down | #NAME? | 0 | 0 |
| TCONS_00101334 | 677.62529 | 0 down | #NAME? | 0 | 0 |
| TCONS_00079996 | 675.96036 | 0 down | #NAME? | 0 | 0 |
| TCONS_00001214 | 675.70672 | 0 down | #NAME? | 0 | 0 |
| TCONS_00021708 | 674.18269 | 0 down | #NAME? | 0 | 0 |
| TCONS_00025233 | 673.82522 | 0 down | #NAME? | 0 | 0 |
| TCONS_00045709 | 669.17815 | 0 down | #NAME? | 0 | 0 |
| TCONS_00077570 | 666.69358 | 0 down | #NAME? | 0 | 0 |
| TCONS_00058671 | 664.19914 | 0 down | #NAME? | 0 | 0 |
| TCONS_00015247 | 663.56294 | 0 down | #NAME? | 0 | 0 |
| TCONS_00039416 | 663.40937 | 0 down | #NAME? | 0 | 0 |
| TCONS_00023818 | 661.62949 | 0 down | #NAME? | 0 | 0 |
| TCONS_00058317 | 658.4177  | 0 down | #NAME? | 0 | 0 |
| TCONS_00070310 | 658.17193 | 0 down | #NAME? | 0 | 0 |
| TCONS_00010274 | 656.93708 | 0 down | #NAME? | 0 | 0 |
| TCONS_00027055 | 656.93708 | 0 down | #NAME? | 0 | 0 |
| TCONS_00011628 | 655.23694 | 0 down | #NAME? | 0 | 0 |
| TCONS_00096314 | 653.93209 | 0 down | #NAME? | 0 | 0 |
| TCONS_00038949 | 652.24468 | 0 down | #NAME? | 0 | 0 |
| TCONS_00070309 | 650.58987 | 0 down | #NAME? | 0 | 0 |
| TCONS_00095619 | 650.58987 | 0 down | #NAME? | 0 | 0 |
| TCONS_00042823 | 649.19346 | 0 down | #NAME? | 0 | 0 |
| TCONS_00020444 | 649.02218 | 0 down | #NAME? | 0 | 0 |
| TCONS_00037941 | 647.46203 | 0 down | #NAME? | 0 | 0 |
| TCONS_00037803 | 647.20628 | 0 down | #NAME? | 0 | 0 |

|                |           |        |        |   |   |
|----------------|-----------|--------|--------|---|---|
| TCONS_00086336 | 646.01113 | 0 down | #NAME? | 0 | 0 |
| TCONS_00078828 | 645.9428  | 0 down | #NAME? | 0 | 0 |
| TCONS_00033872 | 644.70687 | 0 down | #NAME? | 0 | 0 |
| TCONS_00046336 | 644.45482 | 0 down | #NAME? | 0 | 0 |
| TCONS_00028969 | 644.36413 | 0 down | #NAME? | 0 | 0 |
| TCONS_00053389 | 644.36413 | 0 down | #NAME? | 0 | 0 |
| TCONS_00039158 | 644.32071 | 0 down | #NAME? | 0 | 0 |
| TCONS_00050066 | 644.32071 | 0 down | #NAME? | 0 | 0 |
| TCONS_00010969 | 639.78324 | 0 down | #NAME? | 0 | 0 |
| TCONS_00020538 | 639.71618 | 0 down | #NAME? | 0 | 0 |
| TCONS_00036827 | 637.4325  | 0 down | #NAME? | 0 | 0 |
| TCONS_00090408 | 637.40908 | 0 down | #NAME? | 0 | 0 |
| TCONS_00015470 | 636.71504 | 0 down | #NAME? | 0 | 0 |
| TCONS_00087412 | 635.99576 | 0 down | #NAME? | 0 | 0 |
| TCONS_00021051 | 634.97754 | 0 down | #NAME? | 0 | 0 |
| TCONS_00053429 | 634.20175 | 0 down | #NAME? | 0 | 0 |
| TCONS_00014706 | 633.90753 | 0 down | #NAME? | 0 | 0 |
| TCONS_00019846 | 633.47505 | 0 down | #NAME? | 0 | 0 |
| TCONS_00034049 | 633.3589  | 0 down | #NAME? | 0 | 0 |
| TCONS_00061627 | 632.45897 | 0 down | #NAME? | 0 | 0 |
| TCONS_00087149 | 632.00158 | 0 down | #NAME? | 0 | 0 |
| TCONS_00091135 | 629.56471 | 0 down | #NAME? | 0 | 0 |
| TCONS_00051414 | 628.96312 | 0 down | #NAME? | 0 | 0 |
| TCONS_00048729 | 626.98109 | 0 down | #NAME? | 0 | 0 |
| TCONS_00034213 | 624.33839 | 0 down | #NAME? | 0 | 0 |
| TCONS_00013285 | 622.97299 | 0 down | #NAME? | 0 | 0 |
| TCONS_00015980 | 622.70744 | 0 down | #NAME? | 0 | 0 |
| TCONS_00066056 | 621.65129 | 0 down | #NAME? | 0 | 0 |
| TCONS_00080557 | 620.78918 | 0 down | #NAME? | 0 | 0 |
| TCONS_00075906 | 620.42515 | 0 down | #NAME? | 0 | 0 |
| TCONS_00028357 | 617.71868 | 0 down | #NAME? | 0 | 0 |
| TCONS_00087058 | 617.59024 | 0 down | #NAME? | 0 | 0 |
| TCONS_00049809 | 616.74852 | 0 down | #NAME? | 0 | 0 |
| TCONS_00068976 | 616.74852 | 0 down | #NAME? | 0 | 0 |
| TCONS_00037387 | 614.94111 | 0 down | #NAME? | 0 | 0 |
| TCONS_00058348 | 613.4133  | 0 down | #NAME? | 0 | 0 |
| TCONS_00097229 | 612.14592 | 0 down | #NAME? | 0 | 0 |
| TCONS_00033949 | 611.46802 | 0 down | #NAME? | 0 | 0 |
| TCONS_00023826 | 611.28435 | 0 down | #NAME? | 0 | 0 |
| TCONS_00074713 | 610.69448 | 0 down | #NAME? | 0 | 0 |
| TCONS_00075597 | 610.4642  | 0 down | #NAME? | 0 | 0 |
| TCONS_00010012 | 609.6268  | 0 down | #NAME? | 0 | 0 |
| TCONS_00083593 | 609.23094 | 0 down | #NAME? | 0 | 0 |
| TCONS_00056362 | 608.76623 | 0 down | #NAME? | 0 | 0 |
| TCONS_00062940 | 608.76623 | 0 down | #NAME? | 0 | 0 |
| TCONS_00008382 | 608.57656 | 0 down | #NAME? | 0 | 0 |
| TCONS_00000971 | 608.28786 | 0 down | #NAME? | 0 | 0 |
| TCONS_00011557 | 607.73955 | 0 down | #NAME? | 0 | 0 |
| TCONS_00028019 | 607.6949  | 0 down | #NAME? | 0 | 0 |

|                |           |        |        |   |   |
|----------------|-----------|--------|--------|---|---|
| TCONS_00076777 | 605.83947 | 0 down | #NAME? | 0 | 0 |
| TCONS_00000698 | 605.52624 | 0 down | #NAME? | 0 | 0 |
| TCONS_00010641 | 604.65026 | 0 down | #NAME? | 0 | 0 |
| TCONS_00098669 | 602.10543 | 0 down | #NAME? | 0 | 0 |
| TCONS_00069065 | 601.80707 | 0 down | #NAME? | 0 | 0 |
| TCONS_00034982 | 600.62819 | 0 down | #NAME? | 0 | 0 |
| TCONS_00019552 | 600.1116  | 0 down | #NAME? | 0 | 0 |
| TCONS_00079573 | 599.10522 | 0 down | #NAME? | 0 | 0 |
| TCONS_00018541 | 599.02851 | 0 down | #NAME? | 0 | 0 |
| TCONS_00067767 | 598.85704 | 0 down | #NAME? | 0 | 0 |
| TCONS_00000351 | 598.33812 | 0 down | #NAME? | 0 | 0 |
| TCONS_00033953 | 598.33812 | 0 down | #NAME? | 0 | 0 |
| TCONS_00068501 | 598.33812 | 0 down | #NAME? | 0 | 0 |
| TCONS_00001912 | 597.06843 | 0 down | #NAME? | 0 | 0 |
| TCONS_00063046 | 595.83073 | 0 down | #NAME? | 0 | 0 |
| TCONS_00075562 | 595.26212 | 0 down | #NAME? | 0 | 0 |
| TCONS_00058624 | 594.82502 | 0 down | #NAME? | 0 | 0 |
| TCONS_00057328 | 594.42361 | 0 down | #NAME? | 0 | 0 |
| TCONS_00050316 | 593.04289 | 0 down | #NAME? | 0 | 0 |
| TCONS_00028171 | 592.58972 | 0 down | #NAME? | 0 | 0 |
| TCONS_00084321 | 591.67165 | 0 down | #NAME? | 0 | 0 |
| TCONS_00038829 | 588.37326 | 0 down | #NAME? | 0 | 0 |
| TCONS_00076333 | 587.97957 | 0 down | #NAME? | 0 | 0 |
| TCONS_00028944 | 587.59116 | 0 down | #NAME? | 0 | 0 |
| TCONS_00017342 | 587.47269 | 0 down | #NAME? | 0 | 0 |
| TCONS_00031862 | 587.34056 | 0 down | #NAME? | 0 | 0 |
| TCONS_00042469 | 587.34056 | 0 down | #NAME? | 0 | 0 |
| TCONS_00045297 | 585.53088 | 0 down | #NAME? | 0 | 0 |
| TCONS_00075330 | 585.14541 | 0 down | #NAME? | 0 | 0 |
| TCONS_00034262 | 584.71081 | 0 down | #NAME? | 0 | 0 |
| TCONS_00078762 | 584.53031 | 0 down | #NAME? | 0 | 0 |
| TCONS_00080468 | 583.70363 | 0 down | #NAME? | 0 | 0 |
| TCONS_00074182 | 583.54872 | 0 down | #NAME? | 0 | 0 |
| TCONS_00063381 | 583.25991 | 0 down | #NAME? | 0 | 0 |
| TCONS_00049420 | 582.85252 | 0 down | #NAME? | 0 | 0 |
| TCONS_00071913 | 582.22901 | 0 down | #NAME? | 0 | 0 |
| TCONS_00047043 | 581.85856 | 0 down | #NAME? | 0 | 0 |
| TCONS_00078782 | 581.74684 | 0 down | #NAME? | 0 | 0 |
| TCONS_00089838 | 581.74684 | 0 down | #NAME? | 0 | 0 |
| TCONS_00097040 | 581.74684 | 0 down | #NAME? | 0 | 0 |
| TCONS_00070802 | 581.64031 | 0 down | #NAME? | 0 | 0 |
| TCONS_00082335 | 580.97583 | 0 down | #NAME? | 0 | 0 |
| TCONS_00039061 | 580.79613 | 0 down | #NAME? | 0 | 0 |
| TCONS_00022104 | 580.73994 | 0 down | #NAME? | 0 | 0 |
| TCONS_00080253 | 579.86319 | 0 down | #NAME? | 0 | 0 |
| TCONS_00049037 | 577.16615 | 0 down | #NAME? | 0 | 0 |
| TCONS_00014692 | 575.32511 | 0 down | #NAME? | 0 | 0 |
| TCONS_00085355 | 575.32511 | 0 down | #NAME? | 0 | 0 |
| TCONS_00015012 | 575.18276 | 0 down | #NAME? | 0 | 0 |

|                |           |        |        |   |   |
|----------------|-----------|--------|--------|---|---|
| TCONS_00073953 | 574.44688 | 0 down | #NAME? | 0 | 0 |
| TCONS_00037472 | 574.43077 | 0 down | #NAME? | 0 | 0 |
| TCONS_00065675 | 574.43077 | 0 down | #NAME? | 0 | 0 |
| TCONS_00074785 | 574.43077 | 0 down | #NAME? | 0 | 0 |
| TCONS_00066713 | 574.36438 | 0 down | #NAME? | 0 | 0 |
| TCONS_00035031 | 573.55322 | 0 down | #NAME? | 0 | 0 |
| TCONS_00039772 | 573.55322 | 0 down | #NAME? | 0 | 0 |
| TCONS_00045429 | 573.07278 | 0 down | #NAME? | 0 | 0 |
| TCONS_00069776 | 572.692   | 0 down | #NAME? | 0 | 0 |
| TCONS_00076145 | 571.72119 | 0 down | #NAME? | 0 | 0 |
| TCONS_00007665 | 569.87179 | 0 down | #NAME? | 0 | 0 |
| TCONS_00100464 | 568.21784 | 0 down | #NAME? | 0 | 0 |
| TCONS_00095454 | 568.07692 | 0 down | #NAME? | 0 | 0 |
| TCONS_00099897 | 567.78134 | 0 down | #NAME? | 0 | 0 |
| TCONS_00100763 | 565.02512 | 0 down | #NAME? | 0 | 0 |
| TCONS_00042566 | 564.81091 | 0 down | #NAME? | 0 | 0 |
| TCONS_00039662 | 562.64625 | 0 down | #NAME? | 0 | 0 |
| TCONS_00087926 | 561.99572 | 0 down | #NAME? | 0 | 0 |
| TCONS_00018327 | 561.51731 | 0 down | #NAME? | 0 | 0 |
| TCONS_00063052 | 560.83796 | 0 down | #NAME? | 0 | 0 |
| TCONS_00005949 | 559.67627 | 0 down | #NAME? | 0 | 0 |
| TCONS_00009330 | 559.59218 | 0 down | #NAME? | 0 | 0 |
| TCONS_00078073 | 557.16535 | 0 down | #NAME? | 0 | 0 |
| TCONS_00016783 | 556.68032 | 0 down | #NAME? | 0 | 0 |
| TCONS_00061155 | 556.19487 | 0 down | #NAME? | 0 | 0 |
| TCONS_00063337 | 556.19487 | 0 down | #NAME? | 0 | 0 |
| TCONS_00028568 | 555.68586 | 0 down | #NAME? | 0 | 0 |
| TCONS_00044342 | 554.81394 | 0 down | #NAME? | 0 | 0 |
| TCONS_00011025 | 554.42069 | 0 down | #NAME? | 0 | 0 |
| TCONS_00002135 | 554.26273 | 0 down | #NAME? | 0 | 0 |
| TCONS_00028575 | 554.26273 | 0 down | #NAME? | 0 | 0 |
| TCONS_00095338 | 553.57131 | 0 down | #NAME? | 0 | 0 |
| TCONS_00010871 | 553.00139 | 0 down | #NAME? | 0 | 0 |
| TCONS_00004688 | 551.6359  | 0 down | #NAME? | 0 | 0 |
| TCONS_00093195 | 549.68205 | 0 down | #NAME? | 0 | 0 |
| TCONS_00049958 | 547.81872 | 0 down | #NAME? | 0 | 0 |
| TCONS_00076021 | 547.64115 | 0 down | #NAME? | 0 | 0 |
| TCONS_00095436 | 547.07692 | 0 down | #NAME? | 0 | 0 |
| TCONS_00057557 | 545.84706 | 0 down | #NAME? | 0 | 0 |
| TCONS_00008764 | 545.718   | 0 down | #NAME? | 0 | 0 |
| TCONS_00071823 | 545.718   | 0 down | #NAME? | 0 | 0 |
| TCONS_00001231 | 545.17646 | 0 down | #NAME? | 0 | 0 |
| TCONS_00022191 | 545.10137 | 0 down | #NAME? | 0 | 0 |
| TCONS_00037063 | 543.70725 | 0 down | #NAME? | 0 | 0 |
| TCONS_00036070 | 543.10691 | 0 down | #NAME? | 0 | 0 |
| TCONS_00060510 | 539.9051  | 0 down | #NAME? | 0 | 0 |
| TCONS_00029627 | 539.62689 | 0 down | #NAME? | 0 | 0 |
| TCONS_00075126 | 539.06017 | 0 down | #NAME? | 0 | 0 |
| TCONS_00080676 | 538.41807 | 0 down | #NAME? | 0 | 0 |

|                |           |        |        |          |          |
|----------------|-----------|--------|--------|----------|----------|
| TCONS_00063380 | 536.89875 | 0 down | #NAME? | 0        | 0        |
| TCONS_00093572 | 534.97124 | 0 down | #NAME? | 0        | 0        |
| TCONS_00034504 | 534.93448 | 0 down | #NAME? | 0        | 0        |
| TCONS_00052489 | 534.93448 | 0 down | #NAME? | 0        | 0        |
| TCONS_00038856 | 533.9017  | 0 down | #NAME? | 0        | 0        |
| TCONS_00016161 | 532.96874 | 0 down | #NAME? | 0        | 0        |
| TCONS_00057334 | 532.87522 | 0 down | #NAME? | 0        | 0        |
| TCONS_00084323 | 532.33771 | 0 down | #NAME? | 0        | 0        |
| TCONS_00001801 | 531.84381 | 0 down | #NAME? | 0        | 0        |
| TCONS_00061798 | 527.21908 | 0 down | #NAME? | 0        | 0        |
| TCONS_00009292 | 526.00661 | 0 down | #NAME? | 0        | 0        |
| TCONS_00057508 | 525.11896 | 0 down | #NAME? | 0        | 0        |
| TCONS_00027095 | 523.50671 | 0 down | #NAME? | 0        | 0        |
| TCONS_00053576 | 522.99846 | 0 down | #NAME? | 0        | 0        |
| TCONS_00041154 | 522.19795 | 0 down | #NAME? | 0        | 0        |
| TCONS_00079467 | 520.85726 | 0 down | #NAME? | 0        | 0        |
| TCONS_00019589 | 520.32403 | 0 down | #NAME? | 0        | 0        |
| TCONS_00015253 | 520.0939  | 0 down | #NAME? | 0        | 0        |
| TCONS_00040164 | 519.72308 | 0 down | #NAME? | 0        | 0        |
| TCONS_00086008 | 516.86521 | 0 down | #NAME? | 0        | 0        |
| TCONS_00037746 | 516.74656 | 0 down | #NAME? | 0        | 0        |
| TCONS_00045129 | 516.59933 | 0 down | #NAME? | 0        | 0        |
| TCONS_00036740 | 512.73408 | 0 down | #NAME? | 0        | 0        |
| TCONS_00042457 | 511.85989 | 0 down | #NAME? | 0        | 0        |
| TCONS_00101613 | 511.17775 | 0 down | #NAME? | 0        | 0        |
| TCONS_00048844 | 508.72017 | 0 down | #NAME? | 0        | 0        |
| TCONS_00009643 | 508.4559  | 0 down | #NAME? | 0        | 0        |
| TCONS_00092888 | 508.19661 | 0 down | #NAME? | 0        | 0        |
| TCONS_00039353 | 507.94217 | 0 down | #NAME? | 0        | 0        |
| TCONS_00005125 | 507.44731 | 0 down | #NAME? | 6.78E-89 | 6.96E-88 |
| TCONS_00090702 | 507.0343  | 0 down | #NAME? | 6.78E-89 | 6.96E-88 |
| TCONS_00060140 | 506.78004 | 0 down | #NAME? | 6.79E-89 | 6.96E-88 |
| TCONS_00068387 | 506.53068 | 0 down | #NAME? | 6.79E-89 | 6.96E-88 |
| TCONS_00038885 | 504.91157 | 0 down | #NAME? | 1.50E-88 | 1.52E-87 |
| TCONS_00038436 | 504.72349 | 0 down | #NAME? | 1.50E-88 | 1.52E-87 |
| TCONS_00009934 | 503.34258 | 0 down | #NAME? | 3.30E-88 | 3.34E-87 |
| TCONS_00019444 | 502.83415 | 0 down | #NAME? | 3.30E-88 | 3.34E-87 |
| TCONS_00029698 | 502.06705 | 0 down | #NAME? | 4.89E-88 | 4.94E-87 |
| TCONS_00036143 | 501.29455 | 0 down | #NAME? | 7.26E-88 | 7.33E-87 |
| TCONS_00042677 | 499.68665 | 0 down | #NAME? | 1.08E-87 | 1.08E-86 |
| TCONS_00045588 | 499.65031 | 0 down | #NAME? | 1.08E-87 | 1.08E-86 |
| TCONS_00069351 | 499.5501  | 0 down | #NAME? | 1.08E-87 | 1.08E-86 |
| TCONS_00096181 | 497.0809  | 0 down | #NAME? | 3.53E-87 | 3.49E-86 |
| TCONS_00065174 | 496.77838 | 0 down | #NAME? | 3.53E-87 | 3.49E-86 |
| TCONS_00024396 | 495.09034 | 0 down | #NAME? | 7.78E-87 | 7.67E-86 |
| TCONS_00058297 | 494.82695 | 0 down | #NAME? | 7.78E-87 | 7.67E-86 |
| TCONS_00011079 | 494.45698 | 0 down | #NAME? | 1.15E-86 | 1.13E-85 |
| TCONS_00035394 | 494.33212 | 0 down | #NAME? | 1.15E-86 | 1.13E-85 |
| TCONS_00038550 | 493.77332 | 0 down | #NAME? | 1.15E-86 | 1.13E-85 |

|                |           |        |        |          |          |
|----------------|-----------|--------|--------|----------|----------|
| TCONS_00066926 | 492.70281 | 0 down | #NAME? | 1.71E-86 | 1.66E-85 |
| TCONS_00056820 | 492.54156 | 0 down | #NAME? | 1.71E-86 | 1.66E-85 |
| TCONS_00061823 | 492.05409 | 0 down | #NAME? | 2.54E-86 | 2.46E-85 |
| TCONS_00002353 | 490.40261 | 0 down | #NAME? | 5.61E-86 | 5.35E-85 |
| TCONS_00045074 | 490.31105 | 0 down | #NAME? | 5.61E-86 | 5.35E-85 |
| TCONS_00076907 | 490.13316 | 0 down | #NAME? | 5.61E-86 | 5.35E-85 |
| TCONS_00092379 | 490.04673 | 0 down | #NAME? | 5.61E-86 | 5.35E-85 |
| TCONS_00023254 | 489.96192 | 0 down | #NAME? | 5.61E-86 | 5.35E-85 |
| TCONS_00011003 | 487.81026 | 0 down | #NAME? | 1.24E-85 | 1.18E-84 |
| TCONS_00093404 | 485.64142 | 0 down | #NAME? | 2.72E-85 | 2.57E-84 |
| TCONS_00037376 | 485.59652 | 0 down | #NAME? | 2.72E-85 | 2.57E-84 |
| TCONS_00050051 | 483.99677 | 0 down | #NAME? | 6.00E-85 | 5.63E-84 |
| TCONS_00053722 | 483.25128 | 0 down | #NAME? | 8.91E-85 | 8.27E-84 |
| TCONS_00083479 | 483.25128 | 0 down | #NAME? | 8.91E-85 | 8.27E-84 |
| TCONS_00086948 | 483.18825 | 0 down | #NAME? | 8.91E-85 | 8.27E-84 |
| TCONS_00028685 | 482.7466  | 0 down | #NAME? | 8.91E-85 | 8.27E-84 |
| TCONS_00014073 | 480.97179 | 0 down | #NAME? | 1.96E-84 | 1.82E-83 |
| TCONS_00017148 | 478.09172 | 0 down | #NAME? | 6.43E-84 | 5.91E-83 |
| TCONS_00022724 | 476.47673 | 0 down | #NAME? | 1.42E-83 | 1.29E-82 |
| TCONS_00094183 | 476.39111 | 0 down | #NAME? | 1.42E-83 | 1.29E-82 |
| TCONS_00085660 | 474.00119 | 0 down | #NAME? | 3.12E-83 | 2.83E-82 |
| TCONS_00080976 | 471.98167 | 0 down | #NAME? | 6.88E-83 | 6.21E-82 |
| TCONS_00045396 | 471.72234 | 0 down | #NAME? | 6.89E-83 | 6.21E-82 |
| TCONS_00039655 | 471.54097 | 0 down | #NAME? | 6.89E-83 | 6.21E-82 |
| TCONS_00061349 | 469.68138 | 0 down | #NAME? | 1.52E-82 | 1.36E-81 |
| TCONS_00009719 | 469.1252  | 0 down | #NAME? | 2.25E-82 | 2.02E-81 |
| TCONS_00041058 | 465.94143 | 0 down | #NAME? | 7.37E-82 | 6.52E-81 |
| TCONS_00017845 | 464.70705 | 0 down | #NAME? | 1.09E-81 | 9.65E-81 |
| TCONS_00038558 | 463.58727 | 0 down | #NAME? | 1.63E-81 | 1.43E-80 |
| TCONS_00099053 | 462.64906 | 0 down | #NAME? | 2.41E-81 | 2.12E-80 |
| TCONS_00029277 | 460.45641 | 0 down | #NAME? | 7.90E-81 | 6.85E-80 |
| TCONS_00034693 | 460.26009 | 0 down | #NAME? | 7.90E-81 | 6.85E-80 |
| TCONS_00038273 | 460.26009 | 0 down | #NAME? | 7.90E-81 | 6.85E-80 |
| TCONS_00038528 | 458.49648 | 0 down | #NAME? | 1.74E-80 | 1.50E-79 |
| TCONS_00042186 | 457.62365 | 0 down | #NAME? | 1.74E-80 | 1.50E-79 |
| TCONS_00004717 | 457.57317 | 0 down | #NAME? | 1.74E-80 | 1.50E-79 |
| TCONS_00022129 | 456.81339 | 0 down | #NAME? | 2.58E-80 | 2.23E-79 |
| TCONS_00075684 | 455.65749 | 0 down | #NAME? | 3.84E-80 | 3.30E-79 |
| TCONS_00082634 | 454.84873 | 0 down | #NAME? | 5.70E-80 | 4.88E-79 |
| TCONS_00070054 | 454.03737 | 0 down | #NAME? | 8.46E-80 | 7.20E-79 |
| TCONS_00025046 | 454.02431 | 0 down | #NAME? | 8.46E-80 | 7.20E-79 |
| TCONS_00005649 | 454.00141 | 0 down | #NAME? | 8.46E-80 | 7.20E-79 |
| TCONS_00092617 | 453.74698 | 0 down | #NAME? | 8.46E-80 | 7.20E-79 |
| TCONS_00009119 | 452.42096 | 0 down | #NAME? | 1.86E-79 | 1.58E-78 |
| TCONS_00099930 | 451.61671 | 0 down | #NAME? | 1.86E-79 | 1.58E-78 |
| TCONS_00077867 | 451.05489 | 0 down | #NAME? | 2.77E-79 | 2.32E-78 |
| TCONS_00002354 | 450.91106 | 0 down | #NAME? | 2.77E-79 | 2.32E-78 |
| TCONS_00024714 | 450.80013 | 0 down | #NAME? | 2.77E-79 | 2.32E-78 |
| TCONS_00046359 | 450.61921 | 0 down | #NAME? | 2.77E-79 | 2.32E-78 |



|                |           |        |        |          |          |
|----------------|-----------|--------|--------|----------|----------|
| TCONS_00093692 | 450.3645  | 0 down | #NAME? | 4.11E-79 | 3.42E-78 |
| TCONS_00095829 | 450.33665 | 0 down | #NAME? | 4.11E-79 | 3.42E-78 |
| TCONS_00081922 | 449.40222 | 0 down | #NAME? | 6.10E-79 | 5.06E-78 |
| TCONS_00051378 | 448.90701 | 0 down | #NAME? | 6.10E-79 | 5.06E-78 |
| TCONS_00062251 | 447.96393 | 0 down | #NAME? | 9.06E-79 | 7.50E-78 |
| TCONS_00017910 | 446.77949 | 0 down | #NAME? | 1.35E-78 | 1.11E-77 |
| TCONS_00058247 | 446.11877 | 0 down | #NAME? | 2.00E-78 | 1.64E-77 |
| TCONS_00014687 | 445.67111 | 0 down | #NAME? | 2.00E-78 | 1.64E-77 |
| TCONS_00058487 | 443.97396 | 0 down | #NAME? | 4.40E-78 | 3.59E-77 |
| TCONS_00075357 | 443.97396 | 0 down | #NAME? | 4.40E-78 | 3.59E-77 |
| TCONS_00057136 | 443.74487 | 0 down | #NAME? | 4.40E-78 | 3.59E-77 |
| TCONS_00069734 | 443.60704 | 0 down | #NAME? | 4.40E-78 | 3.59E-77 |
| TCONS_00016476 | 443.24852 | 0 down | #NAME? | 6.54E-78 | 5.32E-77 |
| TCONS_00036141 | 441.8684  | 0 down | #NAME? | 9.71E-78 | 7.84E-77 |
| TCONS_00061528 | 441.84969 | 0 down | #NAME? | 9.71E-78 | 7.84E-77 |
| TCONS_00102083 | 441.84969 | 0 down | #NAME? | 9.71E-78 | 7.84E-77 |
| TCONS_00093098 | 440.13457 | 0 down | #NAME? | 2.14E-77 | 1.72E-76 |
| TCONS_00084324 | 440.00574 | 0 down | #NAME? | 2.14E-77 | 1.72E-76 |
| TCONS_00002610 | 439.24365 | 0 down | #NAME? | 3.18E-77 | 2.55E-76 |
| TCONS_00038977 | 439.14816 | 0 down | #NAME? | 3.18E-77 | 2.55E-76 |
| TCONS_00013887 | 438.11292 | 0 down | #NAME? | 4.72E-77 | 3.76E-76 |
| TCONS_00037563 | 438.06821 | 0 down | #NAME? | 4.72E-77 | 3.76E-76 |
| TCONS_00079861 | 436.84594 | 0 down | #NAME? | 7.00E-77 | 5.58E-76 |
| TCONS_00033778 | 435.5971  | 0 down | #NAME? | 1.04E-76 | 8.25E-76 |
| TCONS_00011262 | 435.16496 | 0 down | #NAME? | 1.54E-76 | 1.22E-75 |
| TCONS_00015943 | 433.8177  | 0 down | #NAME? | 2.29E-76 | 1.81E-75 |
| TCONS_00059181 | 433.46841 | 0 down | #NAME? | 3.40E-76 | 2.68E-75 |
| TCONS_00079718 | 432.17755 | 0 down | #NAME? | 5.05E-76 | 3.97E-75 |
| TCONS_00095971 | 430.09978 | 0 down | #NAME? | 1.11E-75 | 8.74E-75 |
| TCONS_00090448 | 428.97484 | 0 down | #NAME? | 1.65E-75 | 1.29E-74 |
| TCONS_00072032 | 428.58873 | 0 down | #NAME? | 1.65E-75 | 1.29E-74 |
| TCONS_00048591 | 427.53048 | 0 down | #NAME? | 2.46E-75 | 1.91E-74 |
| TCONS_00050861 | 427.53048 | 0 down | #NAME? | 2.46E-75 | 1.91E-74 |
| TCONS_00051745 | 427.53048 | 0 down | #NAME? | 2.46E-75 | 1.91E-74 |
| TCONS_00094228 | 427.20758 | 0 down | #NAME? | 3.65E-75 | 2.82E-74 |
| TCONS_00056349 | 427.03103 | 0 down | #NAME? | 3.65E-75 | 2.82E-74 |
| TCONS_00062428 | 426.52216 | 0 down | #NAME? | 3.65E-75 | 2.82E-74 |
| TCONS_00010619 | 426.4286  | 0 down | #NAME? | 5.41E-75 | 4.17E-74 |
| TCONS_00095397 | 425.31037 | 0 down | #NAME? | 8.04E-75 | 6.16E-74 |
| TCONS_00092876 | 425.04484 | 0 down | #NAME? | 8.04E-75 | 6.16E-74 |
| TCONS_00061297 | 424.7899  | 0 down | #NAME? | 8.04E-75 | 6.16E-74 |
| TCONS_00101246 | 423.98461 | 0 down | #NAME? | 1.19E-74 | 9.13E-74 |
| TCONS_00009102 | 423.13341 | 0 down | #NAME? | 1.77E-74 | 1.34E-73 |
| TCONS_00064029 | 422.58793 | 0 down | #NAME? | 1.77E-74 | 1.34E-73 |
| TCONS_00017615 | 422.53597 | 0 down | #NAME? | 1.77E-74 | 1.34E-73 |
| TCONS_00000977 | 420.85032 | 0 down | #NAME? | 3.91E-74 | 2.95E-73 |
| TCONS_00035014 | 420.62172 | 0 down | #NAME? | 3.91E-74 | 2.95E-73 |
| TCONS_00031940 | 420.38666 | 0 down | #NAME? | 5.80E-74 | 4.37E-73 |
| TCONS_00033510 | 418.80537 | 0 down | #NAME? | 8.62E-74 | 6.46E-73 |

|                |           |        |        |          |          |
|----------------|-----------|--------|--------|----------|----------|
| TCONS_00007881 | 418.04091 | 0 down | #NAME? | 1.28E-73 | 9.48E-73 |
| TCONS_00011175 | 418.04091 | 0 down | #NAME? | 1.28E-73 | 9.48E-73 |
| TCONS_00031646 | 417.96239 | 0 down | #NAME? | 1.28E-73 | 9.48E-73 |
| TCONS_00076437 | 417.9138  | 0 down | #NAME? | 1.28E-73 | 9.48E-73 |
| TCONS_00067729 | 417.50044 | 0 down | #NAME? | 1.28E-73 | 9.48E-73 |
| TCONS_00021492 | 415.38473 | 0 down | #NAME? | 4.19E-73 | 3.09E-72 |
| TCONS_00063338 | 415.38473 | 0 down | #NAME? | 4.19E-73 | 3.09E-72 |
| TCONS_00041864 | 414.68946 | 0 down | #NAME? | 4.19E-73 | 3.09E-72 |
| TCONS_00008820 | 414.23408 | 0 down | #NAME? | 6.22E-73 | 4.55E-72 |
| TCONS_00021089 | 414.23408 | 0 down | #NAME? | 6.22E-73 | 4.55E-72 |
| TCONS_00034107 | 413.54584 | 0 down | #NAME? | 6.22E-73 | 4.55E-72 |
| TCONS_00062116 | 410.30769 | 0 down | #NAME? | 3.02E-72 | 2.19E-71 |
| TCONS_00072191 | 410.05929 | 0 down | #NAME? | 3.02E-72 | 2.19E-71 |
| TCONS_00068948 | 409.13834 | 0 down | #NAME? | 4.49E-72 | 3.23E-71 |
| TCONS_00074017 | 406.25773 | 0 down | #NAME? | 1.47E-71 | 1.06E-70 |
| TCONS_00039540 | 405.9914  | 0 down | #NAME? | 1.47E-71 | 1.06E-70 |
| TCONS_00036330 | 405.02888 | 0 down | #NAME? | 2.18E-71 | 1.56E-70 |
| TCONS_00007676 | 404.77824 | 0 down | #NAME? | 2.18E-71 | 1.56E-70 |
| TCONS_00003354 | 403.83481 | 0 down | #NAME? | 3.24E-71 | 2.31E-70 |
| TCONS_00071308 | 403.10017 | 0 down | #NAME? | 4.81E-71 | 3.40E-70 |
| TCONS_00002982 | 402.97637 | 0 down | #NAME? | 4.81E-71 | 3.40E-70 |
| TCONS_00050830 | 402.67406 | 0 down | #NAME? | 4.81E-71 | 3.40E-70 |
| TCONS_00053311 | 401.21265 | 0 down | #NAME? | 1.06E-70 | 7.46E-70 |
| TCONS_00101599 | 400.17863 | 0 down | #NAME? | 1.57E-70 | 1.10E-69 |
| TCONS_00018569 | 399.64806 | 0 down | #NAME? | 1.58E-70 | 1.10E-69 |
| TCONS_00063339 | 399.37836 | 0 down | #NAME? | 2.34E-70 | 1.62E-69 |
| TCONS_00101070 | 398.51949 | 0 down | #NAME? | 2.34E-70 | 1.62E-69 |
| TCONS_00071622 | 397.13267 | 0 down | #NAME? | 5.16E-70 | 3.56E-69 |
| TCONS_00085107 | 397.08136 | 0 down | #NAME? | 5.16E-70 | 3.56E-69 |
| TCONS_00069059 | 396.63077 | 0 down | #NAME? | 5.16E-70 | 3.56E-69 |
| TCONS_00081975 | 395.15525 | 0 down | #NAME? | 1.14E-69 | 7.79E-69 |
| TCONS_00084268 | 394.75987 | 0 down | #NAME? | 1.14E-69 | 7.79E-69 |
| TCONS_00023101 | 394.5774  | 0 down | #NAME? | 1.14E-69 | 7.79E-69 |
| TCONS_00021371 | 393.30698 | 0 down | #NAME? | 2.51E-69 | 1.71E-68 |
| TCONS_00067397 | 392.90654 | 0 down | #NAME? | 2.51E-69 | 1.71E-68 |
| TCONS_00049495 | 392.177   | 0 down | #NAME? | 3.72E-69 | 2.52E-68 |
| TCONS_00053988 | 391.90294 | 0 down | #NAME? | 3.72E-69 | 2.52E-68 |
| TCONS_00005113 | 391.22108 | 0 down | #NAME? | 5.53E-69 | 3.73E-68 |
| TCONS_00038298 | 390.35392 | 0 down | #NAME? | 8.21E-69 | 5.53E-68 |
| TCONS_00031666 | 389.5474  | 0 down | #NAME? | 8.21E-69 | 5.53E-68 |
| TCONS_00027707 | 389.35812 | 0 down | #NAME? | 1.22E-68 | 8.16E-68 |
| TCONS_00051050 | 389.25159 | 0 down | #NAME? | 1.22E-68 | 8.16E-68 |
| TCONS_00027522 | 388.39037 | 0 down | #NAME? | 1.81E-68 | 1.21E-67 |
| TCONS_00031704 | 386.6636  | 0 down | #NAME? | 2.69E-68 | 1.79E-67 |
| TCONS_00050049 | 385.64405 | 0 down | #NAME? | 3.99E-68 | 2.65E-67 |
| TCONS_00035362 | 384.01701 | 0 down | #NAME? | 8.80E-68 | 5.82E-67 |
| TCONS_00067602 | 382.0804  | 0 down | #NAME? | 1.94E-67 | 1.28E-66 |
| TCONS_00048551 | 381.2311  | 0 down | #NAME? | 2.88E-67 | 1.89E-66 |
| TCONS_00028586 | 380.94062 | 0 down | #NAME? | 2.88E-67 | 1.89E-66 |

|                |           |        |        |          |          |
|----------------|-----------|--------|--------|----------|----------|
| TCONS_00013919 | 380.30328 | 0 down | #NAME? | 4.28E-67 | 2.79E-66 |
| TCONS_00046008 | 380.08503 | 0 down | #NAME? | 4.28E-67 | 2.79E-66 |
| TCONS_00097124 | 380.08503 | 0 down | #NAME? | 4.28E-67 | 2.79E-66 |
| TCONS_00037699 | 379.09107 | 0 down | #NAME? | 6.36E-67 | 4.13E-66 |
| TCONS_00000817 | 378.81849 | 0 down | #NAME? | 6.36E-67 | 4.13E-66 |
| TCONS_00048245 | 377.23278 | 0 down | #NAME? | 1.40E-66 | 9.07E-66 |
| TCONS_00005784 | 376.41271 | 0 down | #NAME? | 2.08E-66 | 1.34E-65 |
| TCONS_00099375 | 376.03249 | 0 down | #NAME? | 2.08E-66 | 1.34E-65 |
| TCONS_00063747 | 375.82007 | 0 down | #NAME? | 2.08E-66 | 1.34E-65 |
| TCONS_00069894 | 375.39262 | 0 down | #NAME? | 3.09E-66 | 1.97E-65 |
| TCONS_00088054 | 374.84187 | 0 down | #NAME? | 3.09E-66 | 1.97E-65 |
| TCONS_00096009 | 373.24625 | 0 down | #NAME? | 6.82E-66 | 4.32E-65 |
| TCONS_00057343 | 372.91205 | 0 down | #NAME? | 6.82E-66 | 4.32E-65 |
| TCONS_00047051 | 372.07252 | 0 down | #NAME? | 1.01E-65 | 6.41E-65 |
| TCONS_00009917 | 371.44356 | 0 down | #NAME? | 1.50E-65 | 9.46E-65 |
| TCONS_00035879 | 371.03538 | 0 down | #NAME? | 1.50E-65 | 9.46E-65 |
| TCONS_00047999 | 370.97376 | 0 down | #NAME? | 1.50E-65 | 9.46E-65 |
| TCONS_00036139 | 370.74909 | 0 down | #NAME? | 1.50E-65 | 9.46E-65 |
| TCONS_00088786 | 370.30572 | 0 down | #NAME? | 2.23E-65 | 1.40E-64 |
| TCONS_00099308 | 369.9783  | 0 down | #NAME? | 2.23E-65 | 1.40E-64 |
| TCONS_00049667 | 367.62175 | 0 down | #NAME? | 4.92E-65 | 3.07E-64 |
| TCONS_00009278 | 367.11857 | 0 down | #NAME? | 7.31E-65 | 4.54E-64 |
| TCONS_00023264 | 366.31288 | 0 down | #NAME? | 1.09E-64 | 6.72E-64 |
| TCONS_00090968 | 366.0078  | 0 down | #NAME? | 1.09E-64 | 6.72E-64 |
| TCONS_00092186 | 365.18229 | 0 down | #NAME? | 1.61E-64 | 9.93E-64 |
| TCONS_00010853 | 364.87515 | 0 down | #NAME? | 1.61E-64 | 9.93E-64 |
| TCONS_00036868 | 362.99758 | 0 down | #NAME? | 3.56E-64 | 2.18E-63 |
| TCONS_00083317 | 362.55625 | 0 down | #NAME? | 3.56E-64 | 2.18E-63 |
| TCONS_00038790 | 362.25091 | 0 down | #NAME? | 5.28E-64 | 3.22E-63 |
| TCONS_00027835 | 360.21717 | 0 down | #NAME? | 1.16E-63 | 7.07E-63 |
| TCONS_00024945 | 359.12561 | 0 down | #NAME? | 1.73E-63 | 1.05E-62 |
| TCONS_00044447 | 358.48829 | 0 down | #NAME? | 2.57E-63 | 1.55E-62 |
| TCONS_00022847 | 357.9325  | 0 down | #NAME? | 2.57E-63 | 1.55E-62 |
| TCONS_00004687 | 356.62299 | 0 down | #NAME? | 3.81E-63 | 2.29E-62 |
| TCONS_00078799 | 356.04406 | 0 down | #NAME? | 5.67E-63 | 3.39E-62 |
| TCONS_00056912 | 355.39788 | 0 down | #NAME? | 8.41E-63 | 5.00E-62 |
| TCONS_00067149 | 355.34483 | 0 down | #NAME? | 8.41E-63 | 5.00E-62 |
| TCONS_00083468 | 354.65597 | 0 down | #NAME? | 8.41E-63 | 5.00E-62 |
| TCONS_00077926 | 354.63358 | 0 down | #NAME? | 8.41E-63 | 5.00E-62 |
| TCONS_00039953 | 354.12209 | 0 down | #NAME? | 1.25E-62 | 7.40E-62 |
| TCONS_00011170 | 353.71917 | 0 down | #NAME? | 1.25E-62 | 7.40E-62 |
| TCONS_00053878 | 353.19123 | 0 down | #NAME? | 1.86E-62 | 1.10E-61 |
| TCONS_00026841 | 352.31679 | 0 down | #NAME? | 2.76E-62 | 1.62E-61 |
| TCONS_00038258 | 351.82196 | 0 down | #NAME? | 2.76E-62 | 1.62E-61 |
| TCONS_00014407 | 351.39492 | 0 down | #NAME? | 4.09E-62 | 2.39E-61 |
| TCONS_00098312 | 351.04102 | 0 down | #NAME? | 4.09E-62 | 2.39E-61 |
| TCONS_00052512 | 350.61495 | 0 down | #NAME? | 4.09E-62 | 2.39E-61 |
| TCONS_00017346 | 350.20066 | 0 down | #NAME? | 6.08E-62 | 3.54E-61 |
| TCONS_00051394 | 347.23817 | 0 down | #NAME? | 1.99E-61 | 1.16E-60 |

|                |           |        |        |          |          |
|----------------|-----------|--------|--------|----------|----------|
| TCONS_00025006 | 347.07096 | 0 down | #NAME? | 1.99E-61 | 1.16E-60 |
| TCONS_00020332 | 346.48205 | 0 down | #NAME? | 2.96E-61 | 1.71E-60 |
| TCONS_00037067 | 346.04571 | 0 down | #NAME? | 2.96E-61 | 1.71E-60 |
| TCONS_00034015 | 345.9206  | 0 down | #NAME? | 2.96E-61 | 1.71E-60 |
| TCONS_00024904 | 344.51003 | 0 down | #NAME? | 4.39E-61 | 2.54E-60 |
| TCONS_00074120 | 344.27455 | 0 down | #NAME? | 6.52E-61 | 3.73E-60 |
| TCONS_00078105 | 344.22491 | 0 down | #NAME? | 6.52E-61 | 3.73E-60 |
| TCONS_00004700 | 341.58813 | 0 down | #NAME? | 1.44E-60 | 8.20E-60 |
| TCONS_00010685 | 341.18196 | 0 down | #NAME? | 2.14E-60 | 1.21E-59 |
| TCONS_00075991 | 341.18196 | 0 down | #NAME? | 2.14E-60 | 1.21E-59 |
| TCONS_00095417 | 341.05273 | 0 down | #NAME? | 2.14E-60 | 1.21E-59 |
| TCONS_00038034 | 340.94203 | 0 down | #NAME? | 2.14E-60 | 1.21E-59 |
| TCONS_00056899 | 340.68835 | 0 down | #NAME? | 2.14E-60 | 1.21E-59 |
| TCONS_00080516 | 340.03587 | 0 down | #NAME? | 3.17E-60 | 1.79E-59 |
| TCONS_00038979 | 339.964   | 0 down | #NAME? | 3.17E-60 | 1.79E-59 |
| TCONS_00033950 | 339.71985 | 0 down | #NAME? | 3.17E-60 | 1.79E-59 |
| TCONS_00007995 | 338.21761 | 0 down | #NAME? | 7.00E-60 | 3.90E-59 |
| TCONS_00052761 | 337.72838 | 0 down | #NAME? | 7.00E-60 | 3.90E-59 |
| TCONS_00071940 | 337.3641  | 0 down | #NAME? | 1.04E-59 | 5.77E-59 |
| TCONS_00024659 | 336.9019  | 0 down | #NAME? | 1.04E-59 | 5.77E-59 |
| TCONS_00041711 | 336.9019  | 0 down | #NAME? | 1.04E-59 | 5.77E-59 |
| TCONS_00026577 | 334.23464 | 0 down | #NAME? | 3.41E-59 | 1.88E-58 |
| TCONS_00069154 | 334.19636 | 0 down | #NAME? | 3.41E-59 | 1.88E-58 |
| TCONS_00061602 | 333.82517 | 0 down | #NAME? | 3.41E-59 | 1.88E-58 |
| TCONS_00005514 | 332.65072 | 0 down | #NAME? | 5.06E-59 | 2.77E-58 |
| TCONS_00039041 | 329.6802  | 0 down | #NAME? | 1.66E-58 | 9.03E-58 |
| TCONS_00100019 | 328.7376  | 0 down | #NAME? | 2.46E-58 | 1.34E-57 |
| TCONS_00017040 | 328.35574 | 0 down | #NAME? | 3.66E-58 | 1.98E-57 |
| TCONS_00057462 | 326.87403 | 0 down | #NAME? | 5.43E-58 | 2.92E-57 |
| TCONS_00080136 | 326.64929 | 0 down | #NAME? | 5.43E-58 | 2.92E-57 |
| TCONS_00066539 | 325.4426  | 0 down | #NAME? | 1.20E-57 | 6.40E-57 |
| TCONS_00053787 | 323.73102 | 0 down | #NAME? | 1.78E-57 | 9.46E-57 |
| TCONS_00089735 | 323.64457 | 0 down | #NAME? | 1.78E-57 | 9.46E-57 |
| TCONS_00009702 | 323.15292 | 0 down | #NAME? | 2.64E-57 | 1.40E-56 |
| TCONS_00061877 | 322.16035 | 0 down | #NAME? | 3.93E-57 | 2.06E-56 |
| TCONS_00074177 | 322.16035 | 0 down | #NAME? | 3.93E-57 | 2.06E-56 |
| TCONS_00047080 | 322.13925 | 0 down | #NAME? | 3.93E-57 | 2.06E-56 |
| TCONS_00074220 | 322.11872 | 0 down | #NAME? | 3.93E-57 | 2.06E-56 |
| TCONS_00017150 | 320.64786 | 0 down | #NAME? | 5.83E-57 | 3.04E-56 |
| TCONS_00051546 | 320.64786 | 0 down | #NAME? | 5.83E-57 | 3.04E-56 |
| TCONS_00088064 | 320.64786 | 0 down | #NAME? | 5.83E-57 | 3.04E-56 |
| TCONS_00067652 | 319.21959 | 0 down | #NAME? | 1.29E-56 | 6.67E-56 |
| TCONS_00068788 | 319.1282  | 0 down | #NAME? | 1.29E-56 | 6.67E-56 |
| TCONS_00013920 | 319.08373 | 0 down | #NAME? | 1.29E-56 | 6.67E-56 |
| TCONS_00083273 | 317.70614 | 0 down | #NAME? | 1.91E-56 | 9.86E-56 |
| TCONS_00034142 | 317.53478 | 0 down | #NAME? | 1.91E-56 | 9.86E-56 |
| TCONS_00057350 | 316.68925 | 0 down | #NAME? | 2.84E-56 | 1.46E-55 |
| TCONS_00059207 | 316.06718 | 0 down | #NAME? | 4.22E-56 | 2.16E-55 |
| TCONS_00080719 | 314.76442 | 0 down | #NAME? | 6.26E-56 | 3.19E-55 |

|                |           |        |        |          |          |
|----------------|-----------|--------|--------|----------|----------|
| TCONS_00085119 | 314.26046 | 0 down | #NAME? | 9.30E-56 | 4.74E-55 |
| TCONS_00092759 | 313.19094 | 0 down | #NAME? | 1.38E-55 | 7.03E-55 |
| TCONS_00083316 | 311.86299 | 0 down | #NAME? | 2.05E-55 | 1.04E-54 |
| TCONS_00094737 | 309.85683 | 0 down | #NAME? | 4.53E-55 | 2.28E-54 |
| TCONS_00035171 | 308.37426 | 0 down | #NAME? | 9.99E-55 | 5.01E-54 |
| TCONS_00029005 | 307.56019 | 0 down | #NAME? | 9.99E-55 | 5.01E-54 |
| TCONS_00013828 | 307.50656 | 0 down | #NAME? | 9.99E-55 | 5.01E-54 |
| TCONS_00093926 | 307.28754 | 0 down | #NAME? | 1.48E-54 | 7.35E-54 |
| TCONS_00087302 | 306.90581 | 0 down | #NAME? | 1.48E-54 | 7.35E-54 |
| TCONS_00006431 | 306.70665 | 0 down | #NAME? | 1.48E-54 | 7.35E-54 |
| TCONS_00037139 | 306.70665 | 0 down | #NAME? | 1.48E-54 | 7.35E-54 |
| TCONS_00042951 | 306.70665 | 0 down | #NAME? | 1.48E-54 | 7.35E-54 |
| TCONS_00081885 | 306.70665 | 0 down | #NAME? | 1.48E-54 | 7.35E-54 |
| TCONS_00006569 | 306.64577 | 0 down | #NAME? | 1.48E-54 | 7.35E-54 |
| TCONS_00085372 | 306.50163 | 0 down | #NAME? | 1.48E-54 | 7.35E-54 |
| TCONS_00098440 | 305.0065  | 0 down | #NAME? | 3.27E-54 | 1.61E-53 |
| TCONS_00024804 | 304.56521 | 0 down | #NAME? | 3.27E-54 | 1.61E-53 |
| TCONS_00093936 | 304.24262 | 0 down | #NAME? | 4.86E-54 | 2.38E-53 |
| TCONS_00015222 | 303.56417 | 0 down | #NAME? | 4.86E-54 | 2.38E-53 |
| TCONS_00049152 | 303.15798 | 0 down | #NAME? | 7.23E-54 | 3.53E-53 |
| TCONS_00080862 | 302.58319 | 0 down | #NAME? | 7.23E-54 | 3.53E-53 |
| TCONS_00082212 | 302.20352 | 0 down | #NAME? | 1.07E-53 | 5.20E-53 |
| TCONS_00086710 | 302.05958 | 0 down | #NAME? | 1.07E-53 | 5.20E-53 |
| TCONS_00018073 | 301.78622 | 0 down | #NAME? | 1.07E-53 | 5.20E-53 |
| TCONS_00057428 | 301.70049 | 0 down | #NAME? | 1.07E-53 | 5.20E-53 |
| TCONS_00068410 | 300.89231 | 0 down | #NAME? | 1.59E-53 | 7.66E-53 |
| TCONS_00016683 | 300.60737 | 0 down | #NAME? | 1.59E-53 | 7.66E-53 |
| TCONS_00067048 | 299.27134 | 0 down | #NAME? | 3.52E-53 | 1.68E-52 |
| TCONS_00019375 | 298.98247 | 0 down | #NAME? | 3.52E-53 | 1.68E-52 |
| TCONS_00042384 | 298.98247 | 0 down | #NAME? | 3.52E-53 | 1.68E-52 |
| TCONS_00029958 | 298.76064 | 0 down | #NAME? | 3.52E-53 | 1.68E-52 |
| TCONS_00029080 | 297.74444 | 0 down | #NAME? | 5.23E-53 | 2.48E-52 |
| TCONS_00101601 | 297.50833 | 0 down | #NAME? | 5.23E-53 | 2.48E-52 |
| TCONS_00101602 | 297.32802 | 0 down | #NAME? | 7.76E-53 | 3.66E-52 |
| TCONS_00067071 | 297.00562 | 0 down | #NAME? | 7.76E-53 | 3.66E-52 |
| TCONS_00084005 | 296.56759 | 0 down | #NAME? | 7.76E-53 | 3.66E-52 |
| TCONS_00099915 | 295.14178 | 0 down | #NAME? | 1.71E-52 | 8.02E-52 |
| TCONS_00050183 | 294.56646 | 0 down | #NAME? | 1.71E-52 | 8.02E-52 |
| TCONS_00011721 | 294.18663 | 0 down | #NAME? | 2.55E-52 | 1.19E-51 |
| TCONS_00096194 | 292.95555 | 0 down | #NAME? | 3.78E-52 | 1.76E-51 |
| TCONS_00057134 | 292.01859 | 0 down | #NAME? | 5.62E-52 | 2.60E-51 |
| TCONS_00020876 | 291.80297 | 0 down | #NAME? | 5.62E-52 | 2.60E-51 |
| TCONS_00002445 | 291.77436 | 0 down | #NAME? | 5.62E-52 | 2.60E-51 |
| TCONS_00003516 | 290.82015 | 0 down | #NAME? | 8.34E-52 | 3.84E-51 |
| TCONS_00024349 | 289.48209 | 0 down | #NAME? | 1.84E-51 | 8.46E-51 |
| TCONS_00041107 | 288.2228  | 0 down | #NAME? | 2.74E-51 | 1.25E-50 |
| TCONS_00024108 | 287.7242  | 0 down | #NAME? | 2.74E-51 | 1.25E-50 |
| TCONS_00063539 | 286.81804 | 0 down | #NAME? | 4.06E-51 | 1.85E-50 |
| TCONS_00094612 | 286.44542 | 0 down | #NAME? | 6.04E-51 | 2.73E-50 |

|                |           |        |        |          |          |
|----------------|-----------|--------|--------|----------|----------|
| TCONS_00038115 | 286.346   | 0 down | #NAME? | 6.04E-51 | 2.73E-50 |
| TCONS_00003927 | 286.09529 | 0 down | #NAME? | 6.04E-51 | 2.73E-50 |
| TCONS_00059160 | 285.72582 | 0 down | #NAME? | 6.04E-51 | 2.73E-50 |
| TCONS_00037011 | 285.45009 | 0 down | #NAME? | 8.97E-51 | 4.04E-50 |
| TCONS_00029878 | 285.17797 | 0 down | #NAME? | 8.97E-51 | 4.04E-50 |
| TCONS_00017562 | 285.02032 | 0 down | #NAME? | 8.97E-51 | 4.04E-50 |
| TCONS_00042634 | 284.21061 | 0 down | #NAME? | 1.33E-50 | 5.99E-50 |
| TCONS_00029268 | 283.42981 | 0 down | #NAME? | 1.98E-50 | 8.82E-50 |
| TCONS_00017390 | 282.92458 | 0 down | #NAME? | 1.98E-50 | 8.82E-50 |
| TCONS_00002940 | 282.45435 | 0 down | #NAME? | 2.94E-50 | 1.31E-49 |
| TCONS_00038963 | 281.32312 | 0 down | #NAME? | 4.37E-50 | 1.94E-49 |
| TCONS_00024972 | 280.56688 | 0 down | #NAME? | 4.37E-50 | 1.94E-49 |
| TCONS_00092616 | 280.56688 | 0 down | #NAME? | 4.37E-50 | 1.94E-49 |
| TCONS_00022259 | 280.00236 | 0 down | #NAME? | 6.49E-50 | 2.86E-49 |
| TCONS_00087358 | 279.59606 | 0 down | #NAME? | 6.49E-50 | 2.86E-49 |
| TCONS_00082238 | 279.16545 | 0 down | #NAME? | 9.64E-50 | 4.23E-49 |
| TCONS_00039543 | 278.69394 | 0 down | #NAME? | 9.64E-50 | 4.23E-49 |
| TCONS_00050736 | 278.5719  | 0 down | #NAME? | 9.64E-50 | 4.23E-49 |
| TCONS_00062025 | 278.5719  | 0 down | #NAME? | 9.64E-50 | 4.23E-49 |
| TCONS_00008306 | 278.55509 | 0 down | #NAME? | 9.64E-50 | 4.23E-49 |
| TCONS_00071223 | 278.34963 | 0 down | #NAME? | 1.43E-49 | 6.24E-49 |
| TCONS_00008574 | 277.39769 | 0 down | #NAME? | 2.13E-49 | 9.25E-49 |
| TCONS_00040784 | 276.78566 | 0 down | #NAME? | 2.13E-49 | 9.25E-49 |
| TCONS_00039441 | 276.11344 | 0 down | #NAME? | 3.16E-49 | 1.36E-48 |
| TCONS_00037675 | 274.84103 | 0 down | #NAME? | 4.70E-49 | 2.02E-48 |
| TCONS_00047023 | 274.84103 | 0 down | #NAME? | 4.70E-49 | 2.02E-48 |
| TCONS_00080387 | 274.21921 | 0 down | #NAME? | 6.98E-49 | 2.99E-48 |
| TCONS_00077865 | 273.04076 | 0 down | #NAME? | 1.04E-48 | 4.40E-48 |
| TCONS_00073273 | 272.98399 | 0 down | #NAME? | 1.04E-48 | 4.40E-48 |
| TCONS_00002759 | 272.55068 | 0 down | #NAME? | 1.04E-48 | 4.40E-48 |
| TCONS_00096050 | 272.15965 | 0 down | #NAME? | 1.54E-48 | 6.47E-48 |
| TCONS_00015863 | 271.69399 | 0 down | #NAME? | 1.54E-48 | 6.47E-48 |
| TCONS_00004474 | 271.65999 | 0 down | #NAME? | 1.54E-48 | 6.47E-48 |
| TCONS_00069423 | 271.65999 | 0 down | #NAME? | 1.54E-48 | 6.47E-48 |
| TCONS_00021909 | 270.8111  | 0 down | #NAME? | 2.29E-48 | 9.59E-48 |
| TCONS_00099702 | 270.10239 | 0 down | #NAME? | 3.40E-48 | 1.42E-47 |
| TCONS_00080723 | 269.1677  | 0 down | #NAME? | 5.05E-48 | 2.10E-47 |
| TCONS_00008274 | 268.54258 | 0 down | #NAME? | 5.05E-48 | 2.10E-47 |
| TCONS_00017903 | 266.13773 | 0 down | #NAME? | 1.66E-47 | 6.83E-47 |
| TCONS_00066446 | 265.51384 | 0 down | #NAME? | 1.66E-47 | 6.83E-47 |
| TCONS_00102052 | 265.51384 | 0 down | #NAME? | 1.66E-47 | 6.83E-47 |
| TCONS_00072315 | 265.00398 | 0 down | #NAME? | 2.46E-47 | 1.01E-46 |
| TCONS_00046288 | 264.75512 | 0 down | #NAME? | 2.46E-47 | 1.01E-46 |
| TCONS_00011279 | 263.97522 | 0 down | #NAME? | 3.66E-47 | 1.48E-46 |
| TCONS_00059334 | 263.97522 | 0 down | #NAME? | 3.66E-47 | 1.48E-46 |
| TCONS_00077157 | 263.54619 | 0 down | #NAME? | 3.66E-47 | 1.48E-46 |
| TCONS_00093573 | 263.54619 | 0 down | #NAME? | 3.66E-47 | 1.48E-46 |
| TCONS_00050350 | 263.06212 | 0 down | #NAME? | 5.43E-47 | 2.19E-46 |
| TCONS_00020363 | 262.75311 | 0 down | #NAME? | 5.43E-47 | 2.19E-46 |

|                |           |        |        |          |          |
|----------------|-----------|--------|--------|----------|----------|
| TCONS_00021444 | 262.75311 | 0 down | #NAME? | 5.43E-47 | 2.19E-46 |
| TCONS_00018241 | 261.93769 | 0 down | #NAME? | 8.07E-47 | 3.24E-46 |
| TCONS_00069623 | 261.93769 | 0 down | #NAME? | 8.07E-47 | 3.24E-46 |
| TCONS_00040536 | 261.91533 | 0 down | #NAME? | 8.07E-47 | 3.24E-46 |
| TCONS_00031690 | 261.31538 | 0 down | #NAME? | 1.20E-46 | 4.78E-46 |
| TCONS_00085563 | 261.16116 | 0 down | #NAME? | 1.20E-46 | 4.78E-46 |
| TCONS_00013552 | 260.79359 | 0 down | #NAME? | 1.20E-46 | 4.78E-46 |
| TCONS_00042816 | 260.67056 | 0 down | #NAME? | 1.20E-46 | 4.78E-46 |
| TCONS_00053344 | 259.92471 | 0 down | #NAME? | 1.78E-46 | 7.07E-46 |
| TCONS_00036651 | 259.45552 | 0 down | #NAME? | 2.65E-46 | 1.05E-45 |
| TCONS_00008553 | 257.97578 | 0 down | #NAME? | 3.94E-46 | 1.55E-45 |
| TCONS_00093818 | 257.81821 | 0 down | #NAME? | 3.94E-46 | 1.55E-45 |
| TCONS_00056441 | 257.75836 | 0 down | #NAME? | 3.94E-46 | 1.55E-45 |
| TCONS_00018473 | 257.66346 | 0 down | #NAME? | 3.94E-46 | 1.55E-45 |
| TCONS_00100015 | 257.26398 | 0 down | #NAME? | 5.85E-46 | 2.29E-45 |
| TCONS_00035097 | 257.10935 | 0 down | #NAME? | 5.85E-46 | 2.29E-45 |
| TCONS_00038549 | 256.80847 | 0 down | #NAME? | 5.85E-46 | 2.29E-45 |
| TCONS_00041021 | 256.51829 | 0 down | #NAME? | 5.85E-46 | 2.29E-45 |
| TCONS_00089761 | 255.92995 | 0 down | #NAME? | 8.69E-46 | 3.38E-45 |
| TCONS_00076454 | 255.88647 | 0 down | #NAME? | 8.69E-46 | 3.38E-45 |
| TCONS_00058875 | 255.65167 | 0 down | #NAME? | 8.69E-46 | 3.38E-45 |
| TCONS_00067404 | 255.38325 | 0 down | #NAME? | 1.29E-45 | 5.00E-45 |
| TCONS_00018568 | 255.0269  | 0 down | #NAME? | 1.29E-45 | 5.00E-45 |
| TCONS_00030179 | 254.76132 | 0 down | #NAME? | 1.29E-45 | 5.00E-45 |
| TCONS_00085849 | 254.50525 | 0 down | #NAME? | 1.29E-45 | 5.00E-45 |
| TCONS_00031700 | 254.30693 | 0 down | #NAME? | 1.92E-45 | 7.36E-45 |
| TCONS_00026770 | 254.09831 | 0 down | #NAME? | 1.92E-45 | 7.36E-45 |
| TCONS_00075086 | 254.09831 | 0 down | #NAME? | 1.92E-45 | 7.36E-45 |
| TCONS_00062508 | 253.84622 | 0 down | #NAME? | 1.92E-45 | 7.36E-45 |
| TCONS_00016162 | 253.56672 | 0 down | #NAME? | 1.92E-45 | 7.36E-45 |
| TCONS_00077007 | 252.90536 | 0 down | #NAME? | 2.85E-45 | 1.09E-44 |
| TCONS_00052174 | 252.67643 | 0 down | #NAME? | 2.85E-45 | 1.09E-44 |
| TCONS_00099513 | 252.45578 | 0 down | #NAME? | 4.24E-45 | 1.61E-44 |
| TCONS_00078640 | 251.67129 | 0 down | #NAME? | 4.24E-45 | 1.61E-44 |
| TCONS_00052498 | 250.55275 | 0 down | #NAME? | 6.29E-45 | 2.38E-44 |
| TCONS_00038541 | 249.95385 | 0 down | #NAME? | 9.35E-45 | 3.52E-44 |
| TCONS_00064114 | 249.56084 | 0 down | #NAME? | 9.35E-45 | 3.52E-44 |
| TCONS_00093741 | 249.07468 | 0 down | #NAME? | 1.39E-44 | 5.20E-44 |
| TCONS_00032433 | 248.1031  | 0 down | #NAME? | 2.06E-44 | 7.68E-44 |
| TCONS_00007145 | 247.62904 | 0 down | #NAME? | 2.06E-44 | 7.68E-44 |
| TCONS_00024927 | 246.98552 | 0 down | #NAME? | 3.07E-44 | 1.14E-43 |
| TCONS_00077090 | 246.07859 | 0 down | #NAME? | 4.56E-44 | 1.67E-43 |
| TCONS_00007254 | 245.87796 | 0 down | #NAME? | 4.56E-44 | 1.67E-43 |
| TCONS_00058168 | 245.87796 | 0 down | #NAME? | 4.56E-44 | 1.67E-43 |
| TCONS_00093653 | 245.37841 | 0 down | #NAME? | 6.78E-44 | 2.47E-43 |
| TCONS_00007793 | 245.24799 | 0 down | #NAME? | 6.78E-44 | 2.47E-43 |
| TCONS_00037504 | 245.20131 | 0 down | #NAME? | 6.78E-44 | 2.47E-43 |
| TCONS_00016779 | 245.11063 | 0 down | #NAME? | 6.78E-44 | 2.47E-43 |
| TCONS_00027568 | 245.11063 | 0 down | #NAME? | 6.78E-44 | 2.47E-43 |

|                |           |        |        |          |          |
|----------------|-----------|--------|--------|----------|----------|
| TCONS_00049433 | 244.85837 | 0 down | #NAME? | 6.78E-44 | 2.47E-43 |
| TCONS_00092138 | 243.93785 | 0 down | #NAME? | 1.01E-43 | 3.64E-43 |
| TCONS_00084353 | 243.87302 | 0 down | #NAME? | 1.01E-43 | 3.64E-43 |
| TCONS_00058404 | 243.81059 | 0 down | #NAME? | 1.01E-43 | 3.64E-43 |
| TCONS_00099184 | 243.69238 | 0 down | #NAME? | 1.01E-43 | 3.64E-43 |
| TCONS_00063433 | 243.08294 | 0 down | #NAME? | 1.50E-43 | 5.37E-43 |
| TCONS_00006665 | 242.73343 | 0 down | #NAME? | 1.50E-43 | 5.37E-43 |
| TCONS_00060932 | 242.34054 | 0 down | #NAME? | 2.22E-43 | 7.96E-43 |
| TCONS_00034725 | 242.21601 | 0 down | #NAME? | 2.22E-43 | 7.96E-43 |
| TCONS_00061626 | 241.67056 | 0 down | #NAME? | 2.22E-43 | 7.96E-43 |
| TCONS_00011501 | 241.62564 | 0 down | #NAME? | 2.22E-43 | 7.96E-43 |
| TCONS_00073978 | 241.47555 | 0 down | #NAME? | 3.30E-43 | 1.18E-42 |
| TCONS_00082211 | 240.4859  | 0 down | #NAME? | 4.91E-43 | 1.75E-42 |
| TCONS_00003506 | 239.41707 | 0 down | #NAME? | 7.30E-43 | 2.58E-42 |
| TCONS_00036106 | 239.3128  | 0 down | #NAME? | 7.30E-43 | 2.58E-42 |
| TCONS_00011711 | 238.2796  | 0 down | #NAME? | 1.08E-42 | 3.79E-42 |
| TCONS_00042250 | 238.2796  | 0 down | #NAME? | 1.08E-42 | 3.79E-42 |
| TCONS_00024963 | 238.1661  | 0 down | #NAME? | 1.08E-42 | 3.79E-42 |
| TCONS_00087596 | 237.65665 | 0 down | #NAME? | 1.08E-42 | 3.79E-42 |
| TCONS_00007239 | 237.30767 | 0 down | #NAME? | 1.61E-42 | 5.62E-42 |
| TCONS_00021274 | 237.13028 | 0 down | #NAME? | 1.61E-42 | 5.62E-42 |
| TCONS_00085249 | 236.19151 | 0 down | #NAME? | 2.39E-42 | 8.30E-42 |
| TCONS_00095895 | 236.11343 | 0 down | #NAME? | 2.39E-42 | 8.30E-42 |
| TCONS_00017383 | 235.97935 | 0 down | #NAME? | 2.39E-42 | 8.30E-42 |
| TCONS_00078897 | 235.80718 | 0 down | #NAME? | 2.39E-42 | 8.30E-42 |
| TCONS_00063975 | 235.23511 | 0 down | #NAME? | 3.56E-42 | 1.22E-41 |
| TCONS_00020145 | 234.94475 | 0 down | #NAME? | 3.56E-42 | 1.22E-41 |
| TCONS_00014085 | 234.84069 | 0 down | #NAME? | 3.56E-42 | 1.22E-41 |
| TCONS_00050606 | 233.98628 | 0 down | #NAME? | 5.29E-42 | 1.81E-41 |
| TCONS_00075214 | 233.86702 | 0 down | #NAME? | 5.29E-42 | 1.81E-41 |
| TCONS_00083160 | 233.86702 | 0 down | #NAME? | 5.29E-42 | 1.81E-41 |
| TCONS_00100382 | 233.7433  | 0 down | #NAME? | 5.29E-42 | 1.81E-41 |
| TCONS_00037491 | 233.72031 | 0 down | #NAME? | 5.29E-42 | 1.81E-41 |
| TCONS_00000541 | 233.65822 | 0 down | #NAME? | 5.29E-42 | 1.81E-41 |
| TCONS_00053376 | 233.19845 | 0 down | #NAME? | 7.86E-42 | 2.67E-41 |
| TCONS_00049449 | 232.93701 | 0 down | #NAME? | 7.86E-42 | 2.67E-41 |
| TCONS_00008674 | 232.50769 | 0 down | #NAME? | 7.86E-42 | 2.67E-41 |
| TCONS_00038342 | 232.39033 | 0 down | #NAME? | 1.17E-41 | 3.96E-41 |
| TCONS_00088822 | 232.19328 | 0 down | #NAME? | 1.17E-41 | 3.96E-41 |
| TCONS_00037686 | 232.0478  | 0 down | #NAME? | 1.17E-41 | 3.96E-41 |
| TCONS_00002405 | 231.74096 | 0 down | #NAME? | 1.17E-41 | 3.96E-41 |
| TCONS_00073584 | 231.41096 | 0 down | #NAME? | 1.74E-41 | 5.85E-41 |
| TCONS_00058848 | 230.86646 | 0 down | #NAME? | 1.74E-41 | 5.85E-41 |
| TCONS_00095215 | 230.69235 | 0 down | #NAME? | 1.74E-41 | 5.85E-41 |
| TCONS_00070803 | 230.51183 | 0 down | #NAME? | 1.74E-41 | 5.85E-41 |
| TCONS_00069157 | 230.41905 | 0 down | #NAME? | 2.58E-41 | 8.58E-41 |
| TCONS_00088267 | 230.32452 | 0 down | #NAME? | 2.58E-41 | 8.58E-41 |
| TCONS_00068536 | 230.28347 | 0 down | #NAME? | 2.58E-41 | 8.58E-41 |
| TCONS_00006884 | 230.02999 | 0 down | #NAME? | 2.58E-41 | 8.58E-41 |



|                |           |        |        |          |          |
|----------------|-----------|--------|--------|----------|----------|
| TCONS_00071731 | 229.81587 | 0 down | #NAME? | 2.58E-41 | 8.58E-41 |
| TCONS_00036887 | 229.6532  | 0 down | #NAME? | 2.58E-41 | 8.58E-41 |
| TCONS_00021910 | 228.81182 | 0 down | #NAME? | 3.83E-41 | 1.27E-40 |
| TCONS_00099727 | 227.94872 | 0 down | #NAME? | 5.70E-41 | 1.88E-40 |
| TCONS_00028968 | 227.60272 | 0 down | #NAME? | 5.70E-41 | 1.88E-40 |
| TCONS_00057137 | 227.12557 | 0 down | #NAME? | 8.47E-41 | 2.77E-40 |
| TCONS_00063388 | 226.87349 | 0 down | #NAME? | 8.47E-41 | 2.77E-40 |
| TCONS_00021309 | 225.32012 | 0 down | #NAME? | 1.87E-40 | 6.07E-40 |
| TCONS_00026758 | 224.01426 | 0 down | #NAME? | 2.78E-40 | 9.00E-40 |
| TCONS_00003298 | 223.60969 | 0 down | #NAME? | 2.78E-40 | 9.00E-40 |
| TCONS_00027488 | 222.99601 | 0 down | #NAME? | 4.13E-40 | 1.33E-39 |
| TCONS_00005648 | 221.75647 | 0 down | #NAME? | 6.14E-40 | 1.96E-39 |
| TCONS_00093499 | 221.33215 | 0 down | #NAME? | 9.13E-40 | 2.90E-39 |
| TCONS_00041975 | 221.27032 | 0 down | #NAME? | 9.13E-40 | 2.90E-39 |
| TCONS_00083937 | 220.35712 | 0 down | #NAME? | 1.36E-39 | 4.29E-39 |
| TCONS_00017385 | 219.62182 | 0 down | #NAME? | 1.36E-39 | 4.29E-39 |
| TCONS_00099673 | 218.41231 | 0 down | #NAME? | 3.00E-39 | 9.37E-39 |
| TCONS_00102020 | 218.04055 | 0 down | #NAME? | 3.00E-39 | 9.37E-39 |
| TCONS_00037069 | 217.6343  | 0 down | #NAME? | 3.00E-39 | 9.37E-39 |
| TCONS_00070237 | 217.6343  | 0 down | #NAME? | 3.00E-39 | 9.37E-39 |
| TCONS_00083452 | 217.6343  | 0 down | #NAME? | 3.00E-39 | 9.37E-39 |
| TCONS_00086188 | 217.40521 | 0 down | #NAME? | 4.46E-39 | 1.38E-38 |
| TCONS_00033332 | 217.21307 | 0 down | #NAME? | 4.46E-39 | 1.38E-38 |
| TCONS_00057232 | 217.02386 | 0 down | #NAME? | 4.46E-39 | 1.38E-38 |
| TCONS_00049986 | 216.90885 | 0 down | #NAME? | 4.46E-39 | 1.38E-38 |
| TCONS_00080591 | 216.77602 | 0 down | #NAME? | 4.46E-39 | 1.38E-38 |
| TCONS_00011713 | 216.54141 | 0 down | #NAME? | 4.46E-39 | 1.38E-38 |
| TCONS_00039877 | 216.32224 | 0 down | #NAME? | 6.62E-39 | 2.04E-38 |
| TCONS_00010989 | 216.21668 | 0 down | #NAME? | 6.62E-39 | 2.04E-38 |
| TCONS_00077124 | 216.11948 | 0 down | #NAME? | 6.62E-39 | 2.04E-38 |
| TCONS_00044792 | 216.00128 | 0 down | #NAME? | 6.62E-39 | 2.04E-38 |
| TCONS_00089924 | 215.85076 | 0 down | #NAME? | 6.62E-39 | 2.04E-38 |
| TCONS_00100923 | 215.68242 | 0 down | #NAME? | 6.62E-39 | 2.04E-38 |
| TCONS_00041916 | 215.29214 | 0 down | #NAME? | 9.84E-39 | 2.99E-38 |
| TCONS_00061519 | 215.22939 | 0 down | #NAME? | 9.84E-39 | 2.99E-38 |
| TCONS_00080322 | 215.22939 | 0 down | #NAME? | 9.84E-39 | 2.99E-38 |
| TCONS_00027044 | 214.27179 | 0 down | #NAME? | 1.46E-38 | 4.40E-38 |
| TCONS_00088535 | 214.27179 | 0 down | #NAME? | 1.46E-38 | 4.40E-38 |
| TCONS_00014758 | 213.76524 | 0 down | #NAME? | 1.46E-38 | 4.40E-38 |
| TCONS_00049193 | 213.76524 | 0 down | #NAME? | 1.46E-38 | 4.40E-38 |
| TCONS_00086768 | 213.76524 | 0 down | #NAME? | 1.46E-38 | 4.40E-38 |
| TCONS_00065735 | 213.31803 | 0 down | #NAME? | 2.17E-38 | 6.52E-38 |
| TCONS_00061865 | 213.26108 | 0 down | #NAME? | 2.17E-38 | 6.52E-38 |
| TCONS_00067915 | 212.73752 | 0 down | #NAME? | 2.17E-38 | 6.52E-38 |
| TCONS_00018222 | 212.37716 | 0 down | #NAME? | 3.23E-38 | 9.61E-38 |
| TCONS_00070258 | 211.95367 | 0 down | #NAME? | 3.23E-38 | 9.61E-38 |
| TCONS_00029360 | 211.88185 | 0 down | #NAME? | 3.23E-38 | 9.61E-38 |
| TCONS_00051505 | 211.88185 | 0 down | #NAME? | 3.23E-38 | 9.61E-38 |
| TCONS_00023160 | 211.80409 | 0 down | #NAME? | 3.23E-38 | 9.61E-38 |

|                |           |        |        |          |          |
|----------------|-----------|--------|--------|----------|----------|
| TCONS_00014468 | 211.36877 | 0 down | #NAME? | 4.81E-38 | 1.43E-37 |
| TCONS_00018186 | 210.42516 | 0 down | #NAME? | 7.14E-38 | 2.11E-37 |
| TCONS_00021126 | 209.48994 | 0 down | #NAME? | 1.06E-37 | 3.12E-37 |
| TCONS_00045084 | 209.48994 | 0 down | #NAME? | 1.06E-37 | 3.12E-37 |
| TCONS_00051314 | 209.48994 | 0 down | #NAME? | 1.06E-37 | 3.12E-37 |
| TCONS_00041427 | 209.11817 | 0 down | #NAME? | 1.06E-37 | 3.12E-37 |
| TCONS_00002964 | 208.2129  | 0 down | #NAME? | 1.58E-37 | 4.63E-37 |
| TCONS_00099206 | 207.9878  | 0 down | #NAME? | 1.58E-37 | 4.63E-37 |
| TCONS_00008354 | 207.74369 | 0 down | #NAME? | 1.58E-37 | 4.63E-37 |
| TCONS_00035075 | 207.74369 | 0 down | #NAME? | 1.58E-37 | 4.63E-37 |
| TCONS_00069879 | 206.84279 | 0 down | #NAME? | 2.35E-37 | 6.83E-37 |
| TCONS_00026719 | 205.81119 | 0 down | #NAME? | 3.49E-37 | 1.00E-36 |
| TCONS_00057031 | 205.81119 | 0 down | #NAME? | 3.49E-37 | 1.00E-36 |
| TCONS_00091924 | 205.81119 | 0 down | #NAME? | 3.49E-37 | 1.00E-36 |
| TCONS_00002194 | 205.50613 | 0 down | #NAME? | 3.49E-37 | 1.00E-36 |
| TCONS_00029441 | 205.50613 | 0 down | #NAME? | 3.49E-37 | 1.00E-36 |
| TCONS_00037636 | 205.50613 | 0 down | #NAME? | 3.49E-37 | 1.00E-36 |
| TCONS_00017576 | 204.93581 | 0 down | #NAME? | 5.18E-37 | 1.49E-36 |
| TCONS_00005312 | 204.66885 | 0 down | #NAME? | 5.18E-37 | 1.49E-36 |
| TCONS_00013407 | 204.41301 | 0 down | #NAME? | 7.71E-37 | 2.19E-36 |
| TCONS_00041459 | 204.04864 | 0 down | #NAME? | 7.71E-37 | 2.19E-36 |
| TCONS_00001023 | 203.80161 | 0 down | #NAME? | 7.71E-37 | 2.19E-36 |
| TCONS_00067275 | 203.65472 | 0 down | #NAME? | 7.71E-37 | 2.19E-36 |
| TCONS_00068505 | 203.65472 | 0 down | #NAME? | 7.71E-37 | 2.19E-36 |
| TCONS_00073705 | 203.65472 | 0 down | #NAME? | 7.71E-37 | 2.19E-36 |
| TCONS_00075131 | 203.22752 | 0 down | #NAME? | 1.15E-36 | 3.26E-36 |
| TCONS_00018098 | 202.38912 | 0 down | #NAME? | 1.70E-36 | 4.80E-36 |
| TCONS_00049000 | 201.55009 | 0 down | #NAME? | 1.70E-36 | 4.80E-36 |
| TCONS_00044370 | 201.24343 | 0 down | #NAME? | 2.53E-36 | 7.07E-36 |
| TCONS_00034066 | 201.13366 | 0 down | #NAME? | 2.53E-36 | 7.07E-36 |
| TCONS_00026832 | 200.79405 | 0 down | #NAME? | 2.53E-36 | 7.07E-36 |
| TCONS_00027228 | 200.75344 | 0 down | #NAME? | 2.53E-36 | 7.07E-36 |
| TCONS_00056285 | 200.4422  | 0 down | #NAME? | 3.76E-36 | 1.04E-35 |
| TCONS_00044490 | 200.40491 | 0 down | #NAME? | 3.76E-36 | 1.04E-35 |
| TCONS_00071062 | 200.40491 | 0 down | #NAME? | 3.76E-36 | 1.04E-35 |
| TCONS_00086845 | 200.24132 | 0 down | #NAME? | 3.76E-36 | 1.04E-35 |
| TCONS_00029029 | 200.22355 | 0 down | #NAME? | 3.76E-36 | 1.04E-35 |
| TCONS_00001930 | 199.88438 | 0 down | #NAME? | 3.76E-36 | 1.04E-35 |
| TCONS_00050760 | 199.82403 | 0 down | #NAME? | 3.76E-36 | 1.04E-35 |
| TCONS_00006721 | 199.78828 | 0 down | #NAME? | 3.76E-36 | 1.04E-35 |
| TCONS_00039247 | 199.72558 | 0 down | #NAME? | 3.76E-36 | 1.04E-35 |
| TCONS_00021190 | 199.48139 | 0 down | #NAME? | 5.60E-36 | 1.54E-35 |
| TCONS_00047947 | 199.32164 | 0 down | #NAME? | 5.60E-36 | 1.54E-35 |
| TCONS_00080220 | 199.32164 | 0 down | #NAME? | 5.60E-36 | 1.54E-35 |
| TCONS_00061152 | 199.02281 | 0 down | #NAME? | 5.60E-36 | 1.54E-35 |
| TCONS_00014546 | 198.42783 | 0 down | #NAME? | 8.32E-36 | 2.27E-35 |
| TCONS_00058496 | 198.42783 | 0 down | #NAME? | 8.32E-36 | 2.27E-35 |
| TCONS_00044701 | 198.29539 | 0 down | #NAME? | 8.32E-36 | 2.27E-35 |
| TCONS_00101979 | 198.29539 | 0 down | #NAME? | 8.32E-36 | 2.27E-35 |

|                |           |        |        |          |          |
|----------------|-----------|--------|--------|----------|----------|
| TCONS_00036527 | 197.08113 | 0 down | #NAME? | 1.24E-35 | 3.36E-35 |
| TCONS_00057384 | 196.86287 | 0 down | #NAME? | 1.24E-35 | 3.36E-35 |
| TCONS_00093414 | 196.76119 | 0 down | #NAME? | 1.24E-35 | 3.36E-35 |
| TCONS_00003586 | 196.66402 | 0 down | #NAME? | 1.24E-35 | 3.36E-35 |
| TCONS_00009982 | 196.57108 | 0 down | #NAME? | 1.24E-35 | 3.36E-35 |
| TCONS_00021187 | 196.39682 | 0 down | #NAME? | 1.84E-35 | 4.93E-35 |
| TCONS_00068720 | 195.95147 | 0 down | #NAME? | 1.84E-35 | 4.93E-35 |
| TCONS_00034812 | 195.93097 | 0 down | #NAME? | 1.84E-35 | 4.93E-35 |
| TCONS_00007468 | 195.90014 | 0 down | #NAME? | 1.84E-35 | 4.93E-35 |
| TCONS_00094987 | 195.74433 | 0 down | #NAME? | 1.84E-35 | 4.93E-35 |
| TCONS_00083719 | 195.64954 | 0 down | #NAME? | 1.84E-35 | 4.93E-35 |
| TCONS_00075113 | 194.98857 | 0 down | #NAME? | 2.73E-35 | 7.31E-35 |
| TCONS_00002410 | 194.9313  | 0 down | #NAME? | 2.73E-35 | 7.31E-35 |
| TCONS_00023614 | 194.9313  | 0 down | #NAME? | 2.73E-35 | 7.31E-35 |
| TCONS_00010923 | 194.82402 | 0 down | #NAME? | 2.73E-35 | 7.31E-35 |
| TCONS_00061576 | 194.15375 | 0 down | #NAME? | 4.06E-35 | 1.08E-34 |
| TCONS_00062450 | 194.04012 | 0 down | #NAME? | 4.06E-35 | 1.08E-34 |
| TCONS_00028543 | 192.97349 | 0 down | #NAME? | 6.04E-35 | 1.60E-34 |
| TCONS_00020233 | 192.38872 | 0 down | #NAME? | 8.98E-35 | 2.36E-34 |
| TCONS_00022133 | 192.38872 | 0 down | #NAME? | 8.98E-35 | 2.36E-34 |
| TCONS_00042567 | 192.38872 | 0 down | #NAME? | 8.98E-35 | 2.36E-34 |
| TCONS_00074903 | 192.38872 | 0 down | #NAME? | 8.98E-35 | 2.36E-34 |
| TCONS_00075912 | 192.38872 | 0 down | #NAME? | 8.98E-35 | 2.36E-34 |
| TCONS_00057330 | 191.66545 | 0 down | #NAME? | 8.99E-35 | 2.36E-34 |
| TCONS_00060843 | 191.55587 | 0 down | #NAME? | 8.99E-35 | 2.36E-34 |
| TCONS_00034811 | 191.49803 | 0 down | #NAME? | 1.34E-34 | 3.50E-34 |
| TCONS_00051825 | 190.79873 | 0 down | #NAME? | 1.34E-34 | 3.50E-34 |
| TCONS_00000886 | 190.61555 | 0 down | #NAME? | 1.34E-34 | 3.50E-34 |
| TCONS_00079191 | 189.96365 | 0 down | #NAME? | 1.99E-34 | 5.18E-34 |
| TCONS_00035293 | 189.85729 | 0 down | #NAME? | 1.99E-34 | 5.18E-34 |
| TCONS_00037877 | 189.61388 | 0 down | #NAME? | 1.99E-34 | 5.18E-34 |
| TCONS_00100249 | 189.02822 | 0 down | #NAME? | 2.95E-34 | 7.66E-34 |
| TCONS_00042599 | 188.87477 | 0 down | #NAME? | 2.95E-34 | 7.66E-34 |
| TCONS_00009855 | 188.79267 | 0 down | #NAME? | 2.95E-34 | 7.66E-34 |
| TCONS_00038057 | 188.70664 | 0 down | #NAME? | 2.95E-34 | 7.66E-34 |
| TCONS_00028350 | 188.29534 | 0 down | #NAME? | 4.39E-34 | 1.13E-33 |
| TCONS_00067856 | 188.01625 | 0 down | #NAME? | 4.39E-34 | 1.13E-33 |
| TCONS_00032597 | 187.80803 | 0 down | #NAME? | 4.39E-34 | 1.13E-33 |
| TCONS_00086808 | 187.77666 | 0 down | #NAME? | 4.39E-34 | 1.13E-33 |
| TCONS_00042648 | 187.04459 | 0 down | #NAME? | 6.53E-34 | 1.68E-33 |
| TCONS_00007602 | 186.91795 | 0 down | #NAME? | 6.53E-34 | 1.68E-33 |
| TCONS_00018267 | 186.70635 | 0 down | #NAME? | 6.53E-34 | 1.68E-33 |
| TCONS_00091656 | 186.32241 | 0 down | #NAME? | 9.71E-34 | 2.47E-33 |
| TCONS_00017083 | 186.28114 | 0 down | #NAME? | 9.71E-34 | 2.47E-33 |
| TCONS_00061524 | 186.18263 | 0 down | #NAME? | 9.71E-34 | 2.47E-33 |
| TCONS_00019440 | 185.7831  | 0 down | #NAME? | 9.71E-34 | 2.47E-33 |
| TCONS_00001199 | 185.48688 | 0 down | #NAME? | 1.44E-33 | 3.64E-33 |
| TCONS_00058449 | 185.16285 | 0 down | #NAME? | 1.44E-33 | 3.64E-33 |
| TCONS_00027706 | 184.76356 | 0 down | #NAME? | 1.44E-33 | 3.64E-33 |

|                |           |        |        |          |          |
|----------------|-----------|--------|--------|----------|----------|
| TCONS_00059246 | 184.65881 | 0 down | #NAME? | 1.44E-33 | 3.64E-33 |
| TCONS_00079578 | 184.65881 | 0 down | #NAME? | 1.44E-33 | 3.64E-33 |
| TCONS_00019190 | 184.2976  | 0 down | #NAME? | 2.15E-33 | 5.40E-33 |
| TCONS_00019504 | 184.02399 | 0 down | #NAME? | 2.15E-33 | 5.40E-33 |
| TCONS_00099228 | 183.83811 | 0 down | #NAME? | 2.15E-33 | 5.40E-33 |
| TCONS_00084962 | 183.78597 | 0 down | #NAME? | 2.15E-33 | 5.40E-33 |
| TCONS_00051056 | 183.42145 | 0 down | #NAME? | 3.19E-33 | 7.90E-33 |
| TCONS_00086677 | 183.22735 | 0 down | #NAME? | 3.19E-33 | 7.90E-33 |
| TCONS_00013484 | 183.02466 | 0 down | #NAME? | 3.19E-33 | 7.90E-33 |
| TCONS_00100565 | 183.02466 | 0 down | #NAME? | 3.19E-33 | 7.90E-33 |
| TCONS_00084453 | 182.84878 | 0 down | #NAME? | 3.19E-33 | 7.90E-33 |
| TCONS_00006681 | 182.81281 | 0 down | #NAME? | 3.19E-33 | 7.90E-33 |
| TCONS_00047166 | 182.81281 | 0 down | #NAME? | 3.19E-33 | 7.90E-33 |
| TCONS_00088684 | 182.81281 | 0 down | #NAME? | 3.19E-33 | 7.90E-33 |
| TCONS_00058186 | 182.11553 | 0 down | #NAME? | 4.75E-33 | 1.17E-32 |
| TCONS_00041522 | 181.98933 | 0 down | #NAME? | 4.75E-33 | 1.17E-32 |
| TCONS_00057580 | 181.74971 | 0 down | #NAME? | 4.75E-33 | 1.17E-32 |
| TCONS_00099307 | 181.49879 | 0 down | #NAME? | 7.06E-33 | 1.73E-32 |
| TCONS_00064116 | 181.41919 | 0 down | #NAME? | 7.06E-33 | 1.73E-32 |
| TCONS_00031665 | 181.17323 | 0 down | #NAME? | 7.06E-33 | 1.73E-32 |
| TCONS_00044465 | 180.87828 | 0 down | #NAME? | 7.06E-33 | 1.73E-32 |
| TCONS_00002980 | 180.62696 | 0 down | #NAME? | 7.06E-33 | 1.73E-32 |
| TCONS_00076465 | 180.62696 | 0 down | #NAME? | 7.06E-33 | 1.73E-32 |
| TCONS_00006280 | 180.36442 | 0 down | #NAME? | 1.05E-32 | 2.55E-32 |
| TCONS_00049823 | 180.36442 | 0 down | #NAME? | 1.05E-32 | 2.55E-32 |
| TCONS_00002570 | 180.0899  | 0 down | #NAME? | 1.05E-32 | 2.55E-32 |
| TCONS_00059524 | 179.5628  | 0 down | #NAME? | 1.05E-32 | 2.55E-32 |
| TCONS_00063775 | 179.5628  | 0 down | #NAME? | 1.05E-32 | 2.55E-32 |
| TCONS_00078512 | 179.41011 | 0 down | #NAME? | 1.56E-32 | 3.77E-32 |
| TCONS_00050822 | 179.34541 | 0 down | #NAME? | 1.56E-32 | 3.77E-32 |
| TCONS_00085403 | 179.34541 | 0 down | #NAME? | 1.56E-32 | 3.77E-32 |
| TCONS_00086758 | 179.34541 | 0 down | #NAME? | 1.56E-32 | 3.77E-32 |
| TCONS_00023439 | 179.06309 | 0 down | #NAME? | 1.56E-32 | 3.77E-32 |
| TCONS_00039159 | 179.06309 | 0 down | #NAME? | 1.56E-32 | 3.77E-32 |
| TCONS_00067504 | 179.06309 | 0 down | #NAME? | 1.56E-32 | 3.77E-32 |
| TCONS_00086118 | 179.06309 | 0 down | #NAME? | 1.56E-32 | 3.77E-32 |
| TCONS_00092189 | 179.06309 | 0 down | #NAME? | 1.56E-32 | 3.77E-32 |
| TCONS_00009101 | 178.87381 | 0 down | #NAME? | 1.56E-32 | 3.77E-32 |
| TCONS_00025622 | 178.87381 | 0 down | #NAME? | 1.56E-32 | 3.77E-32 |
| TCONS_00049010 | 178.87381 | 0 down | #NAME? | 1.56E-32 | 3.77E-32 |
| TCONS_00061503 | 178.29127 | 0 down | #NAME? | 2.32E-32 | 5.58E-32 |
| TCONS_00009547 | 177.8     | 0 down | #NAME? | 2.32E-32 | 5.58E-32 |
| TCONS_00002319 | 177.52607 | 0 down | #NAME? | 2.32E-32 | 5.58E-32 |
| TCONS_00025444 | 177.20013 | 0 down | #NAME? | 3.45E-32 | 8.22E-32 |
| TCONS_00098338 | 177.20013 | 0 down | #NAME? | 3.45E-32 | 8.22E-32 |
| TCONS_00002684 | 176.85958 | 0 down | #NAME? | 3.45E-32 | 8.22E-32 |
| TCONS_00027685 | 176.85958 | 0 down | #NAME? | 3.45E-32 | 8.22E-32 |
| TCONS_00061782 | 176.07003 | 0 down | #NAME? | 5.13E-32 | 1.22E-31 |
| TCONS_00091303 | 175.69746 | 0 down | #NAME? | 5.13E-32 | 1.22E-31 |

|                |           |        |        |          |          |
|----------------|-----------|--------|--------|----------|----------|
| TCONS_00057130 | 175.65926 | 0 down | #NAME? | 5.13E-32 | 1.22E-31 |
| TCONS_00054376 | 175.32962 | 0 down | #NAME? | 7.63E-32 | 1.80E-31 |
| TCONS_00016585 | 175.2875  | 0 down | #NAME? | 7.63E-32 | 1.80E-31 |
| TCONS_00093500 | 175.2875  | 0 down | #NAME? | 7.63E-32 | 1.80E-31 |
| TCONS_00037291 | 174.89883 | 0 down | #NAME? | 7.63E-32 | 1.80E-31 |
| TCONS_00075876 | 174.17909 | 0 down | #NAME? | 1.14E-31 | 2.66E-31 |
| TCONS_00009504 | 174.14496 | 0 down | #NAME? | 1.14E-31 | 2.66E-31 |
| TCONS_00004346 | 173.79653 | 0 down | #NAME? | 1.14E-31 | 2.66E-31 |
| TCONS_00045120 | 173.74312 | 0 down | #NAME? | 1.14E-31 | 2.66E-31 |
| TCONS_00047228 | 173.24103 | 0 down | #NAME? | 1.69E-31 | 3.93E-31 |
| TCONS_00030213 | 173.19666 | 0 down | #NAME? | 1.69E-31 | 3.93E-31 |
| TCONS_00086145 | 172.98108 | 0 down | #NAME? | 1.69E-31 | 3.93E-31 |
| TCONS_00076936 | 172.54594 | 0 down | #NAME? | 1.69E-31 | 3.93E-31 |
| TCONS_00080236 | 172.34823 | 0 down | #NAME? | 2.51E-31 | 5.80E-31 |
| TCONS_00041286 | 171.63309 | 0 down | #NAME? | 2.51E-31 | 5.80E-31 |
| TCONS_00072087 | 171.4769  | 0 down | #NAME? | 3.73E-31 | 8.61E-31 |
| TCONS_00068941 | 170.73458 | 0 down | #NAME? | 3.73E-31 | 8.61E-31 |
| TCONS_00024779 | 170.71112 | 0 down | #NAME? | 3.73E-31 | 8.61E-31 |
| TCONS_00063051 | 170.52636 | 0 down | #NAME? | 3.73E-31 | 8.61E-31 |
| TCONS_00054145 | 170.2555  | 0 down | #NAME? | 5.55E-31 | 1.27E-30 |
| TCONS_00083799 | 169.99865 | 0 down | #NAME? | 5.55E-31 | 1.27E-30 |
| TCONS_00010191 | 169.50548 | 0 down | #NAME? | 5.55E-31 | 1.27E-30 |
| TCONS_00029328 | 169.50548 | 0 down | #NAME? | 5.55E-31 | 1.27E-30 |
| TCONS_00037066 | 169.50548 | 0 down | #NAME? | 5.55E-31 | 1.27E-30 |
| TCONS_00048408 | 169.50548 | 0 down | #NAME? | 5.55E-31 | 1.27E-30 |
| TCONS_00053377 | 169.50548 | 0 down | #NAME? | 5.55E-31 | 1.27E-30 |
| TCONS_00068839 | 169.50548 | 0 down | #NAME? | 5.55E-31 | 1.27E-30 |
| TCONS_00038672 | 169.04448 | 0 down | #NAME? | 8.26E-31 | 1.87E-30 |
| TCONS_00088059 | 169.04448 | 0 down | #NAME? | 8.26E-31 | 1.87E-30 |
| TCONS_00044686 | 168.99009 | 0 down | #NAME? | 8.26E-31 | 1.87E-30 |
| TCONS_00017121 | 168.23229 | 0 down | #NAME? | 1.23E-30 | 2.78E-30 |
| TCONS_00085487 | 168.02508 | 0 down | #NAME? | 1.23E-30 | 2.78E-30 |
| TCONS_00008548 | 167.29454 | 0 down | #NAME? | 1.83E-30 | 4.08E-30 |
| TCONS_00009405 | 167.11732 | 0 down | #NAME? | 1.83E-30 | 4.08E-30 |
| TCONS_00068930 | 166.83154 | 0 down | #NAME? | 1.83E-30 | 4.08E-30 |
| TCONS_00070588 | 166.73689 | 0 down | #NAME? | 1.83E-30 | 4.08E-30 |
| TCONS_00020285 | 166.57032 | 0 down | #NAME? | 1.83E-30 | 4.08E-30 |
| TCONS_00045416 | 166.57032 | 0 down | #NAME? | 1.83E-30 | 4.08E-30 |
| TCONS_00047087 | 166.57032 | 0 down | #NAME? | 1.83E-30 | 4.08E-30 |
| TCONS_00075055 | 166.49024 | 0 down | #NAME? | 2.72E-30 | 6.05E-30 |
| TCONS_00013362 | 166.41218 | 0 down | #NAME? | 2.72E-30 | 6.05E-30 |
| TCONS_00076323 | 166.11877 | 0 down | #NAME? | 2.72E-30 | 6.05E-30 |
| TCONS_00016802 | 165.99911 | 0 down | #NAME? | 2.72E-30 | 6.05E-30 |
| TCONS_00042956 | 165.40206 | 0 down | #NAME? | 4.04E-30 | 8.89E-30 |
| TCONS_00007150 | 165.26784 | 0 down | #NAME? | 4.04E-30 | 8.89E-30 |
| TCONS_00042645 | 165.26784 | 0 down | #NAME? | 4.04E-30 | 8.89E-30 |
| TCONS_00078944 | 165.26784 | 0 down | #NAME? | 4.04E-30 | 8.89E-30 |
| TCONS_00059627 | 165.01961 | 0 down | #NAME? | 4.04E-30 | 8.89E-30 |
| TCONS_00076153 | 165.01961 | 0 down | #NAME? | 4.04E-30 | 8.89E-30 |

|                |           |        |        |          |          |
|----------------|-----------|--------|--------|----------|----------|
| TCONS_00068950 | 164.83432 | 0 down | #NAME? | 4.04E-30 | 8.89E-30 |
| TCONS_00002916 | 164.54298 | 0 down | #NAME? | 4.04E-30 | 8.89E-30 |
| TCONS_00041765 | 164.54298 | 0 down | #NAME? | 4.04E-30 | 8.89E-30 |
| TCONS_00092161 | 163.82445 | 0 down | #NAME? | 6.01E-30 | 1.31E-29 |
| TCONS_00014410 | 163.73508 | 0 down | #NAME? | 6.01E-30 | 1.31E-29 |
| TCONS_00023708 | 163.65015 | 0 down | #NAME? | 6.01E-30 | 1.31E-29 |
| TCONS_00032029 | 163.21787 | 0 down | #NAME? | 8.94E-30 | 1.94E-29 |
| TCONS_00009213 | 163.18686 | 0 down | #NAME? | 8.94E-30 | 1.94E-29 |
| TCONS_00039685 | 163.11217 | 0 down | #NAME? | 8.94E-30 | 1.94E-29 |
| TCONS_00004714 | 163.04129 | 0 down | #NAME? | 8.94E-30 | 1.94E-29 |
| TCONS_00062806 | 163.04129 | 0 down | #NAME? | 8.94E-30 | 1.94E-29 |
| TCONS_00097218 | 162.97391 | 0 down | #NAME? | 8.94E-30 | 1.94E-29 |
| TCONS_00074167 | 162.71683 | 0 down | #NAME? | 8.94E-30 | 1.94E-29 |
| TCONS_00000668 | 162.58201 | 0 down | #NAME? | 8.94E-30 | 1.94E-29 |
| TCONS_00073433 | 162.35335 | 0 down | #NAME? | 1.33E-29 | 2.85E-29 |
| TCONS_00063463 | 161.82229 | 0 down | #NAME? | 1.33E-29 | 2.85E-29 |
| TCONS_00007327 | 161.74273 | 0 down | #NAME? | 1.33E-29 | 2.85E-29 |
| TCONS_00084162 | 161.70603 | 0 down | #NAME? | 1.33E-29 | 2.85E-29 |
| TCONS_00092776 | 161.63806 | 0 down | #NAME? | 1.33E-29 | 2.85E-29 |
| TCONS_00001929 | 161.42961 | 0 down | #NAME? | 1.98E-29 | 4.21E-29 |
| TCONS_00078787 | 161.28395 | 0 down | #NAME? | 1.98E-29 | 4.21E-29 |
| TCONS_00049287 | 161.04938 | 0 down | #NAME? | 1.98E-29 | 4.21E-29 |
| TCONS_00094398 | 160.99474 | 0 down | #NAME? | 1.98E-29 | 4.21E-29 |
| TCONS_00007673 | 160.79409 | 0 down | #NAME? | 1.98E-29 | 4.21E-29 |
| TCONS_00064001 | 160.32393 | 0 down | #NAME? | 2.94E-29 | 6.24E-29 |
| TCONS_00079923 | 160.32393 | 0 down | #NAME? | 2.94E-29 | 6.24E-29 |
| TCONS_00087378 | 160.32393 | 0 down | #NAME? | 2.94E-29 | 6.24E-29 |
| TCONS_00014374 | 159.65869 | 0 down | #NAME? | 2.94E-29 | 6.24E-29 |
| TCONS_00048128 | 159.6417  | 0 down | #NAME? | 2.94E-29 | 6.24E-29 |
| TCONS_00037524 | 159.62383 | 0 down | #NAME? | 2.94E-29 | 6.24E-29 |
| TCONS_00009365 | 159.60499 | 0 down | #NAME? | 2.94E-29 | 6.24E-29 |
| TCONS_00014385 | 159.5641  | 0 down | #NAME? | 2.94E-29 | 6.24E-29 |
| TCONS_00088868 | 158.96525 | 0 down | #NAME? | 4.38E-29 | 9.23E-29 |
| TCONS_00044878 | 158.92981 | 0 down | #NAME? | 4.38E-29 | 9.23E-29 |
| TCONS_00076294 | 158.92981 | 0 down | #NAME? | 4.38E-29 | 9.23E-29 |
| TCONS_00046369 | 158.89247 | 0 down | #NAME? | 4.38E-29 | 9.23E-29 |
| TCONS_00027025 | 158.3163  | 0 down | #NAME? | 6.51E-29 | 1.37E-28 |
| TCONS_00047032 | 158.2418  | 0 down | #NAME? | 6.51E-29 | 1.37E-28 |
| TCONS_00034356 | 158.12771 | 0 down | #NAME? | 6.51E-29 | 1.37E-28 |
| TCONS_00101020 | 157.74638 | 0 down | #NAME? | 6.51E-29 | 1.37E-28 |
| TCONS_00078581 | 157.55973 | 0 down | #NAME? | 6.51E-29 | 1.37E-28 |
| TCONS_00016785 | 157.48634 | 0 down | #NAME? | 9.69E-29 | 2.01E-28 |
| TCONS_00061367 | 157.40895 | 0 down | #NAME? | 9.69E-29 | 2.01E-28 |
| TCONS_00059201 | 157.05201 | 0 down | #NAME? | 9.69E-29 | 2.01E-28 |
| TCONS_00102203 | 156.98385 | 0 down | #NAME? | 9.69E-29 | 2.01E-28 |
| TCONS_00050101 | 156.96987 | 0 down | #NAME? | 9.69E-29 | 2.01E-28 |
| TCONS_00001772 | 156.69669 | 0 down | #NAME? | 9.69E-29 | 2.01E-28 |
| TCONS_00087556 | 156.69669 | 0 down | #NAME? | 9.69E-29 | 2.01E-28 |
| TCONS_00007208 | 156.31583 | 0 down | #NAME? | 1.44E-28 | 2.95E-28 |

|                |           |        |        |          |          |
|----------------|-----------|--------|--------|----------|----------|
| TCONS_00063533 | 156.21306 | 0 down | #NAME? | 1.44E-28 | 2.95E-28 |
| TCONS_00085448 | 156.10488 | 0 down | #NAME? | 1.44E-28 | 2.95E-28 |
| TCONS_00047521 | 155.99085 | 0 down | #NAME? | 1.44E-28 | 2.95E-28 |
| TCONS_00076598 | 155.87049 | 0 down | #NAME? | 1.44E-28 | 2.95E-28 |
| TCONS_00087035 | 155.80776 | 0 down | #NAME? | 1.44E-28 | 2.95E-28 |
| TCONS_00094773 | 155.66722 | 0 down | #NAME? | 1.44E-28 | 2.95E-28 |
| TCONS_00062649 | 155.54832 | 0 down | #NAME? | 1.44E-28 | 2.95E-28 |
| TCONS_00053427 | 155.4232  | 0 down | #NAME? | 2.14E-28 | 4.37E-28 |
| TCONS_00055991 | 155.4232  | 0 down | #NAME? | 2.14E-28 | 4.37E-28 |
| TCONS_00039145 | 155.29134 | 0 down | #NAME? | 2.14E-28 | 4.37E-28 |
| TCONS_00009352 | 155.15219 | 0 down | #NAME? | 2.14E-28 | 4.37E-28 |
| TCONS_00068692 | 155.15219 | 0 down | #NAME? | 2.14E-28 | 4.37E-28 |
| TCONS_00039270 | 155.02397 | 0 down | #NAME? | 2.14E-28 | 4.37E-28 |
| TCONS_00066536 | 154.88922 | 0 down | #NAME? | 2.14E-28 | 4.37E-28 |
| TCONS_00045073 | 154.74745 | 0 down | #NAME? | 2.14E-28 | 4.37E-28 |
| TCONS_00007028 | 154.59808 | 0 down | #NAME? | 2.14E-28 | 4.37E-28 |
| TCONS_00102237 | 154.59808 | 0 down | #NAME? | 2.14E-28 | 4.37E-28 |
| TCONS_00015802 | 154.44048 | 0 down | #NAME? | 3.19E-28 | 6.44E-28 |
| TCONS_00083655 | 154.44048 | 0 down | #NAME? | 3.19E-28 | 6.44E-28 |
| TCONS_00032268 | 154.38601 | 0 down | #NAME? | 3.19E-28 | 6.44E-28 |
| TCONS_00079742 | 154.31178 | 0 down | #NAME? | 3.19E-28 | 6.44E-28 |
| TCONS_00039414 | 154.07754 | 0 down | #NAME? | 3.19E-28 | 6.44E-28 |
| TCONS_00057827 | 154.07754 | 0 down | #NAME? | 3.19E-28 | 6.44E-28 |
| TCONS_00061561 | 153.73528 | 0 down | #NAME? | 3.19E-28 | 6.44E-28 |
| TCONS_00053863 | 153.58763 | 0 down | #NAME? | 3.19E-28 | 6.44E-28 |
| TCONS_00077452 | 153.54968 | 0 down | #NAME? | 3.19E-28 | 6.44E-28 |
| TCONS_00076141 | 153.21279 | 0 down | #NAME? | 4.75E-28 | 9.51E-28 |
| TCONS_00045546 | 153.12571 | 0 down | #NAME? | 4.75E-28 | 9.51E-28 |
| TCONS_00066813 | 153.03648 | 0 down | #NAME? | 4.75E-28 | 9.51E-28 |
| TCONS_00091145 | 152.94501 | 0 down | #NAME? | 4.75E-28 | 9.51E-28 |
| TCONS_00036328 | 152.75499 | 0 down | #NAME? | 4.75E-28 | 9.51E-28 |
| TCONS_00040697 | 152.68946 | 0 down | #NAME? | 4.75E-28 | 9.51E-28 |
| TCONS_00091223 | 152.55493 | 0 down | #NAME? | 4.75E-28 | 9.51E-28 |
| TCONS_00086657 | 152.34401 | 0 down | #NAME? | 7.06E-28 | 1.40E-27 |
| TCONS_00047236 | 152.12131 | 0 down | #NAME? | 7.06E-28 | 1.40E-27 |
| TCONS_00082683 | 151.88583 | 0 down | #NAME? | 7.06E-28 | 1.40E-27 |
| TCONS_00053014 | 151.76836 | 0 down | #NAME? | 7.06E-28 | 1.40E-27 |
| TCONS_00020533 | 151.67575 | 0 down | #NAME? | 7.06E-28 | 1.40E-27 |
| TCONS_00010043 | 151.45495 | 0 down | #NAME? | 1.05E-27 | 2.07E-27 |
| TCONS_00062013 | 151.45495 | 0 down | #NAME? | 1.05E-27 | 2.07E-27 |
| TCONS_00102134 | 151.45495 | 0 down | #NAME? | 1.05E-27 | 2.07E-27 |
| TCONS_00073820 | 151.41705 | 0 down | #NAME? | 1.05E-27 | 2.07E-27 |
| TCONS_00006504 | 151.22257 | 0 down | #NAME? | 1.05E-27 | 2.07E-27 |
| TCONS_00006929 | 150.97769 | 0 down | #NAME? | 1.05E-27 | 2.07E-27 |
| TCONS_00057245 | 150.97769 | 0 down | #NAME? | 1.05E-27 | 2.07E-27 |
| TCONS_00045259 | 150.44615 | 0 down | #NAME? | 1.56E-27 | 3.07E-27 |
| TCONS_00076343 | 149.91329 | 0 down | #NAME? | 1.56E-27 | 3.07E-27 |
| TCONS_00035942 | 149.63567 | 0 down | #NAME? | 1.56E-27 | 3.07E-27 |
| TCONS_00054382 | 149.54585 | 0 down | #NAME? | 1.56E-27 | 3.07E-27 |

|                |           |        |        |          |          |
|----------------|-----------|--------|--------|----------|----------|
| TCONS_00000666 | 149.34284 | 0 down | #NAME? | 2.33E-27 | 4.54E-27 |
| TCONS_00095984 | 149.13854 | 0 down | #NAME? | 2.33E-27 | 4.54E-27 |
| TCONS_00091201 | 148.97356 | 0 down | #NAME? | 2.33E-27 | 4.54E-27 |
| TCONS_00042517 | 148.92014 | 0 down | #NAME? | 2.33E-27 | 4.54E-27 |
| TCONS_00023796 | 148.87222 | 0 down | #NAME? | 2.33E-27 | 4.54E-27 |
| TCONS_00072336 | 148.70626 | 0 down | #NAME? | 2.33E-27 | 4.54E-27 |
| TCONS_00019937 | 147.74951 | 0 down | #NAME? | 3.46E-27 | 6.68E-27 |
| TCONS_00068284 | 147.68429 | 0 down | #NAME? | 3.46E-27 | 6.68E-27 |
| TCONS_00049492 | 147.66678 | 0 down | #NAME? | 3.46E-27 | 6.68E-27 |
| TCONS_00039890 | 147.45121 | 0 down | #NAME? | 5.15E-27 | 9.91E-27 |
| TCONS_00080701 | 147.16301 | 0 down | #NAME? | 5.15E-27 | 9.91E-27 |
| TCONS_00080054 | 147.02195 | 0 down | #NAME? | 5.15E-27 | 9.91E-27 |
| TCONS_00045485 | 147.00799 | 0 down | #NAME? | 5.15E-27 | 9.91E-27 |
| TCONS_00056517 | 146.38272 | 0 down | #NAME? | 7.66E-27 | 1.46E-26 |
| TCONS_00040932 | 146.11801 | 0 down | #NAME? | 7.66E-27 | 1.46E-26 |
| TCONS_00095856 | 145.66574 | 0 down | #NAME? | 7.66E-27 | 1.46E-26 |
| TCONS_00059101 | 145.3819  | 0 down | #NAME? | 1.14E-26 | 2.17E-26 |
| TCONS_00042403 | 145.19903 | 0 down | #NAME? | 1.14E-26 | 2.17E-26 |
| TCONS_00093146 | 144.9504  | 0 down | #NAME? | 1.14E-26 | 2.17E-26 |
| TCONS_00058834 | 144.49796 | 0 down | #NAME? | 1.70E-26 | 3.20E-26 |
| TCONS_00087664 | 144.29154 | 0 down | #NAME? | 1.70E-26 | 3.20E-26 |
| TCONS_00003127 | 144.07966 | 0 down | #NAME? | 1.70E-26 | 3.20E-26 |
| TCONS_00023747 | 143.84203 | 0 down | #NAME? | 1.70E-26 | 3.20E-26 |
| TCONS_00059729 | 143.84203 | 0 down | #NAME? | 1.70E-26 | 3.20E-26 |
| TCONS_00041396 | 143.63864 | 0 down | #NAME? | 1.70E-26 | 3.20E-26 |
| TCONS_00058705 | 143.09905 | 0 down | #NAME? | 2.52E-26 | 4.71E-26 |
| TCONS_00074446 | 142.99161 | 0 down | #NAME? | 2.52E-26 | 4.71E-26 |
| TCONS_00066089 | 142.82132 | 0 down | #NAME? | 2.52E-26 | 4.71E-26 |
| TCONS_00044715 | 142.66113 | 0 down | #NAME? | 2.52E-26 | 4.71E-26 |
| TCONS_00040516 | 142.51016 | 0 down | #NAME? | 2.52E-26 | 4.71E-26 |
| TCONS_00079998 | 142.05918 | 0 down | #NAME? | 3.76E-26 | 7.00E-26 |
| TCONS_00077599 | 141.7149  | 0 down | #NAME? | 3.76E-26 | 7.00E-26 |
| TCONS_00009885 | 141.46229 | 0 down | #NAME? | 5.59E-26 | 1.03E-25 |
| TCONS_00033671 | 141.46229 | 0 down | #NAME? | 5.59E-26 | 1.03E-25 |
| TCONS_00055993 | 141.46229 | 0 down | #NAME? | 5.59E-26 | 1.03E-25 |
| TCONS_00087359 | 140.66156 | 0 down | #NAME? | 5.59E-26 | 1.03E-25 |
| TCONS_00038887 | 140.55797 | 0 down | #NAME? | 5.59E-26 | 1.03E-25 |
| TCONS_00005443 | 140.28344 | 0 down | #NAME? | 8.32E-26 | 1.53E-25 |
| TCONS_00088842 | 139.81738 | 0 down | #NAME? | 8.32E-26 | 1.53E-25 |
| TCONS_00018428 | 139.76958 | 0 down | #NAME? | 8.32E-26 | 1.53E-25 |
| TCONS_00021967 | 139.76958 | 0 down | #NAME? | 8.32E-26 | 1.53E-25 |
| TCONS_00071906 | 139.76958 | 0 down | #NAME? | 8.32E-26 | 1.53E-25 |
| TCONS_00063270 | 139.12407 | 0 down | #NAME? | 1.24E-25 | 2.27E-25 |
| TCONS_00093067 | 139.12407 | 0 down | #NAME? | 1.24E-25 | 2.27E-25 |
| TCONS_00048835 | 139.07618 | 0 down | #NAME? | 1.24E-25 | 2.27E-25 |
| TCONS_00025145 | 138.62069 | 0 down | #NAME? | 1.24E-25 | 2.27E-25 |
| TCONS_00037485 | 138.58509 | 0 down | #NAME? | 1.24E-25 | 2.27E-25 |
| TCONS_00028898 | 138.51988 | 0 down | #NAME? | 1.24E-25 | 2.27E-25 |
| TCONS_00008030 | 138.17974 | 0 down | #NAME? | 1.84E-25 | 3.33E-25 |



|                |           |        |        |          |          |
|----------------|-----------|--------|--------|----------|----------|
| TCONS_00086748 | 138.03675 | 0 down | #NAME? | 1.84E-25 | 3.33E-25 |
| TCONS_00084461 | 138.00035 | 0 down | #NAME? | 1.84E-25 | 3.33E-25 |
| TCONS_00045337 | 137.98371 | 0 down | #NAME? | 1.84E-25 | 3.33E-25 |
| TCONS_00003529 | 137.42051 | 0 down | #NAME? | 2.74E-25 | 4.95E-25 |
| TCONS_00007677 | 137.42051 | 0 down | #NAME? | 2.74E-25 | 4.95E-25 |
| TCONS_00017902 | 137.42051 | 0 down | #NAME? | 2.74E-25 | 4.95E-25 |
| TCONS_00034851 | 137.42051 | 0 down | #NAME? | 2.74E-25 | 4.95E-25 |
| TCONS_00094675 | 137.42051 | 0 down | #NAME? | 2.74E-25 | 4.95E-25 |
| TCONS_00033668 | 136.80975 | 0 down | #NAME? | 2.74E-25 | 4.95E-25 |
| TCONS_00013488 | 136.33846 | 0 down | #NAME? | 4.08E-25 | 7.29E-25 |
| TCONS_00011726 | 136.2044  | 0 down | #NAME? | 4.08E-25 | 7.29E-25 |
| TCONS_00048719 | 136.2044  | 0 down | #NAME? | 4.08E-25 | 7.29E-25 |
| TCONS_00069865 | 135.70988 | 0 down | #NAME? | 4.08E-25 | 7.29E-25 |
| TCONS_00062239 | 135.60438 | 0 down | #NAME? | 4.08E-25 | 7.29E-25 |
| TCONS_00065206 | 135.60438 | 0 down | #NAME? | 4.08E-25 | 7.29E-25 |
| TCONS_00060146 | 135.34885 | 0 down | #NAME? | 6.07E-25 | 1.07E-24 |
| TCONS_00032442 | 135.1491  | 0 down | #NAME? | 6.07E-25 | 1.07E-24 |
| TCONS_00022987 | 134.59293 | 0 down | #NAME? | 6.07E-25 | 1.07E-24 |
| TCONS_00066369 | 134.34966 | 0 down | #NAME? | 9.04E-25 | 1.59E-24 |
| TCONS_00019945 | 134.32546 | 0 down | #NAME? | 9.04E-25 | 1.59E-24 |
| TCONS_00036489 | 134.32546 | 0 down | #NAME? | 9.04E-25 | 1.59E-24 |
| TCONS_00078670 | 133.94151 | 0 down | #NAME? | 9.04E-25 | 1.59E-24 |
| TCONS_00056590 | 133.83563 | 0 down | #NAME? | 9.04E-25 | 1.59E-24 |
| TCONS_00067968 | 133.83563 | 0 down | #NAME? | 9.04E-25 | 1.59E-24 |
| TCONS_00069132 | 133.37873 | 0 down | #NAME? | 1.35E-24 | 2.35E-24 |
| TCONS_00075118 | 133.25625 | 0 down | #NAME? | 1.35E-24 | 2.35E-24 |
| TCONS_00102270 | 133.12612 | 0 down | #NAME? | 1.35E-24 | 2.35E-24 |
| TCONS_00046132 | 132.95155 | 0 down | #NAME? | 1.35E-24 | 2.35E-24 |
| TCONS_00022960 | 132.26724 | 0 down | #NAME? | 2.00E-24 | 3.48E-24 |
| TCONS_00090480 | 131.34973 | 0 down | #NAME? | 2.98E-24 | 5.17E-24 |
| TCONS_00039268 | 131.17413 | 0 down | #NAME? | 2.98E-24 | 5.17E-24 |
| TCONS_00022644 | 130.98806 | 0 down | #NAME? | 2.98E-24 | 5.17E-24 |
| TCONS_00098933 | 130.98806 | 0 down | #NAME? | 2.98E-24 | 5.17E-24 |
| TCONS_00049670 | 130.79058 | 0 down | #NAME? | 2.98E-24 | 5.17E-24 |
| TCONS_00045085 | 130.09893 | 0 down | #NAME? | 4.44E-24 | 7.63E-24 |
| TCONS_00092753 | 130.0587  | 0 down | #NAME? | 4.44E-24 | 7.63E-24 |
| TCONS_00013367 | 129.33695 | 0 down | #NAME? | 6.60E-24 | 1.13E-23 |
| TCONS_00021965 | 128.79579 | 0 down | #NAME? | 6.60E-24 | 1.13E-23 |
| TCONS_00057229 | 128.68811 | 0 down | #NAME? | 6.60E-24 | 1.13E-23 |
| TCONS_00035647 | 128.44944 | 0 down | #NAME? | 9.83E-24 | 1.67E-23 |
| TCONS_00028550 | 127.98391 | 0 down | #NAME? | 9.83E-24 | 1.67E-23 |
| TCONS_00091666 | 127.98391 | 0 down | #NAME? | 9.83E-24 | 1.67E-23 |
| TCONS_00068877 | 127.96497 | 0 down | #NAME? | 9.83E-24 | 1.67E-23 |
| TCONS_00018540 | 127.72695 | 0 down | #NAME? | 9.83E-24 | 1.67E-23 |
| TCONS_00098246 | 127.43697 | 0 down | #NAME? | 1.46E-23 | 2.45E-23 |
| TCONS_00039800 | 127.2248  | 0 down | #NAME? | 1.46E-23 | 2.45E-23 |
| TCONS_00009950 | 127.19915 | 0 down | #NAME? | 1.46E-23 | 2.45E-23 |
| TCONS_00050386 | 127.19915 | 0 down | #NAME? | 1.46E-23 | 2.45E-23 |
| TCONS_00010079 | 127.12911 | 0 down | #NAME? | 1.46E-23 | 2.45E-23 |

|                |            |        |        |           |           |
|----------------|------------|--------|--------|-----------|-----------|
| TCONS_00036657 | 126. 80165 | 0 down | #NAME? | 1. 46E-23 | 2. 45E-23 |
| TCONS_00063387 | 126. 69501 | 0 down | #NAME? | 1. 46E-23 | 2. 45E-23 |
| TCONS_00041664 | 126. 6757  | 0 down | #NAME? | 1. 46E-23 | 2. 45E-23 |
| TCONS_00014201 | 126. 57152 | 0 down | #NAME? | 1. 46E-23 | 2. 45E-23 |
| TCONS_00063553 | 126. 57152 | 0 down | #NAME? | 1. 46E-23 | 2. 45E-23 |
| TCONS_00007894 | 126. 357   | 0 down | #NAME? | 2. 18E-23 | 3. 63E-23 |
| TCONS_00047042 | 126. 357   | 0 down | #NAME? | 2. 18E-23 | 3. 63E-23 |
| TCONS_00051842 | 126. 21246 | 0 down | #NAME? | 2. 18E-23 | 3. 63E-23 |
| TCONS_00058591 | 126. 21246 | 0 down | #NAME? | 2. 18E-23 | 3. 63E-23 |
| TCONS_00079124 | 124. 77093 | 0 down | #NAME? | 3. 24E-23 | 5. 36E-23 |
| TCONS_00098210 | 124. 69639 | 0 down | #NAME? | 3. 24E-23 | 5. 36E-23 |
| TCONS_00017343 | 124. 12175 | 0 down | #NAME? | 4. 83E-23 | 7. 91E-23 |
| TCONS_00010937 | 123. 73548 | 0 down | #NAME? | 4. 83E-23 | 7. 91E-23 |
| TCONS_00015515 | 123. 73548 | 0 down | #NAME? | 4. 83E-23 | 7. 91E-23 |
| TCONS_00084004 | 123. 22418 | 0 down | #NAME? | 7. 19E-23 | 1. 18E-22 |
| TCONS_00097701 | 123. 22418 | 0 down | #NAME? | 7. 19E-23 | 1. 18E-22 |
| TCONS_00031985 | 123. 0393  | 0 down | #NAME? | 7. 19E-23 | 1. 18E-22 |
| TCONS_00052895 | 122. 89147 | 0 down | #NAME? | 7. 19E-23 | 1. 18E-22 |
| TCONS_00062917 | 122. 28096 | 0 down | #NAME? | 1. 07E-22 | 1. 74E-22 |
| TCONS_00037427 | 121. 65095 | 0 down | #NAME? | 1. 07E-22 | 1. 74E-22 |
| TCONS_00010163 | 121. 28854 | 0 down | #NAME? | 1. 59E-22 | 2. 58E-22 |
| TCONS_00046229 | 121. 25339 | 0 down | #NAME? | 1. 59E-22 | 2. 58E-22 |
| TCONS_00009748 | 121. 22053 | 0 down | #NAME? | 1. 59E-22 | 2. 58E-22 |
| TCONS_00068567 | 120. 76348 | 0 down | #NAME? | 1. 59E-22 | 2. 58E-22 |
| TCONS_00049944 | 120. 74606 | 0 down | #NAME? | 1. 59E-22 | 2. 58E-22 |
| TCONS_00094349 | 120. 72976 | 0 down | #NAME? | 1. 59E-22 | 2. 58E-22 |
| TCONS_00047512 | 120. 24295 | 0 down | #NAME? | 2. 37E-22 | 3. 81E-22 |
| TCONS_00049158 | 120. 24295 | 0 down | #NAME? | 2. 37E-22 | 3. 81E-22 |
| TCONS_00053428 | 120. 24295 | 0 down | #NAME? | 2. 37E-22 | 3. 81E-22 |
| TCONS_00058171 | 120. 24295 | 0 down | #NAME? | 2. 37E-22 | 3. 81E-22 |
| TCONS_00069733 | 119. 24921 | 0 down | #NAME? | 3. 53E-22 | 5. 62E-22 |
| TCONS_00065722 | 119. 21523 | 0 down | #NAME? | 3. 53E-22 | 5. 62E-22 |
| TCONS_00086766 | 119. 21523 | 0 down | #NAME? | 3. 53E-22 | 5. 62E-22 |
| TCONS_00091469 | 118. 75847 | 0 down | #NAME? | 3. 53E-22 | 5. 62E-22 |
| TCONS_00009716 | 118. 59578 | 0 down | #NAME? | 3. 53E-22 | 5. 62E-22 |
| TCONS_00065772 | 118. 39306 | 0 down | #NAME? | 5. 26E-22 | 8. 35E-22 |
| TCONS_00062893 | 118. 0725  | 0 down | #NAME? | 5. 26E-22 | 8. 35E-22 |
| TCONS_00046120 | 118. 05671 | 0 down | #NAME? | 5. 26E-22 | 8. 35E-22 |
| TCONS_00002139 | 117. 78901 | 0 down | #NAME? | 5. 26E-22 | 8. 35E-22 |
| TCONS_00075511 | 117. 70618 | 0 down | #NAME? | 5. 26E-22 | 8. 35E-22 |
| TCONS_00074114 | 117. 10618 | 0 down | #NAME? | 7. 84E-22 | 1. 23E-21 |
| TCONS_00005790 | 116. 99314 | 0 down | #NAME? | 7. 84E-22 | 1. 23E-21 |
| TCONS_00022003 | 116. 74073 | 0 down | #NAME? | 7. 84E-22 | 1. 23E-21 |
| TCONS_00086949 | 116. 43121 | 0 down | #NAME? | 1. 17E-21 | 1. 82E-21 |
| TCONS_00083651 | 116. 36414 | 0 down | #NAME? | 1. 17E-21 | 1. 82E-21 |
| TCONS_00042604 | 116. 32806 | 0 down | #NAME? | 1. 17E-21 | 1. 82E-21 |
| TCONS_00101098 | 115. 75255 | 0 down | #NAME? | 1. 17E-21 | 1. 82E-21 |
| TCONS_00048338 | 115. 59837 | 0 down | #NAME? | 1. 17E-21 | 1. 82E-21 |
| TCONS_00101512 | 115. 59837 | 0 down | #NAME? | 1. 17E-21 | 1. 82E-21 |

|                |           |        |        |          |          |
|----------------|-----------|--------|--------|----------|----------|
| TCONS_00074676 | 115.43323 | 0 down | #NAME? | 1.74E-21 | 2.68E-21 |
| TCONS_00022612 | 115.27423 | 0 down | #NAME? | 1.74E-21 | 2.68E-21 |
| TCONS_00049649 | 115.27423 | 0 down | #NAME? | 1.74E-21 | 2.68E-21 |
| TCONS_00014741 | 114.92246 | 0 down | #NAME? | 1.74E-21 | 2.68E-21 |
| TCONS_00032620 | 114.79985 | 0 down | #NAME? | 1.74E-21 | 2.68E-21 |
| TCONS_00008647 | 114.32936 | 0 down | #NAME? | 2.59E-21 | 3.97E-21 |
| TCONS_00095468 | 113.72732 | 0 down | #NAME? | 2.59E-21 | 3.97E-21 |
| TCONS_00002438 | 113.48773 | 0 down | #NAME? | 3.85E-21 | 5.91E-21 |
| TCONS_00007454 | 113.39985 | 0 down | #NAME? | 3.85E-21 | 5.91E-21 |
| TCONS_00001179 | 112.69632 | 0 down | #NAME? | 3.85E-21 | 5.91E-21 |
| TCONS_00010975 | 111.79344 | 0 down | #NAME? | 5.74E-21 | 8.72E-21 |
| TCONS_00053399 | 111.76108 | 0 down | #NAME? | 5.74E-21 | 8.72E-21 |
| TCONS_00083803 | 111.29926 | 0 down | #NAME? | 8.55E-21 | 1.29E-20 |
| TCONS_00053156 | 111.22473 | 0 down | #NAME? | 8.55E-21 | 1.29E-20 |
| TCONS_00071942 | 110.99349 | 0 down | #NAME? | 8.55E-21 | 1.29E-20 |
| TCONS_00008175 | 110.84124 | 0 down | #NAME? | 8.55E-21 | 1.29E-20 |
| TCONS_00028576 | 110.84124 | 0 down | #NAME? | 8.55E-21 | 1.29E-20 |
| TCONS_00048756 | 110.38697 | 0 down | #NAME? | 1.27E-20 | 1.92E-20 |
| TCONS_00045599 | 110.31463 | 0 down | #NAME? | 1.27E-20 | 1.92E-20 |
| TCONS_00087085 | 109.7177  | 0 down | #NAME? | 1.27E-20 | 1.92E-20 |
| TCONS_00056305 | 109.58851 | 0 down | #NAME? | 1.27E-20 | 1.92E-20 |
| TCONS_00030164 | 109.12805 | 0 down | #NAME? | 1.90E-20 | 2.84E-20 |
| TCONS_00048046 | 107.84121 | 0 down | #NAME? | 2.83E-20 | 4.22E-20 |
| TCONS_00048200 | 107.80402 | 0 down | #NAME? | 2.83E-20 | 4.22E-20 |
| TCONS_00060652 | 107.34134 | 0 down | #NAME? | 4.21E-20 | 6.22E-20 |
| TCONS_00041655 | 107.32428 | 0 down | #NAME? | 4.21E-20 | 6.22E-20 |
| TCONS_00077836 | 106.88262 | 0 down | #NAME? | 4.21E-20 | 6.22E-20 |
| TCONS_00091925 | 106.88262 | 0 down | #NAME? | 4.21E-20 | 6.22E-20 |
| TCONS_00049526 | 105.97684 | 0 down | #NAME? | 6.27E-20 | 9.17E-20 |
| TCONS_00002371 | 105.47627 | 0 down | #NAME? | 9.34E-20 | 1.36E-19 |
| TCONS_00045170 | 105.41848 | 0 down | #NAME? | 9.34E-20 | 1.36E-19 |
| TCONS_00058988 | 104.89872 | 0 down | #NAME? | 9.34E-20 | 1.36E-19 |
| TCONS_00076322 | 104.72773 | 0 down | #NAME? | 9.34E-20 | 1.36E-19 |
| TCONS_00050184 | 104.55909 | 0 down | #NAME? | 9.34E-20 | 1.36E-19 |
| TCONS_00042701 | 104.46446 | 0 down | #NAME? | 1.39E-19 | 2.01E-19 |
| TCONS_00083679 | 103.476   | 0 down | #NAME? | 2.07E-19 | 2.97E-19 |
| TCONS_00053321 | 103.43479 | 0 down | #NAME? | 2.07E-19 | 2.97E-19 |
| TCONS_00068429 | 103.21283 | 0 down | #NAME? | 2.07E-19 | 2.97E-19 |
| TCONS_00093965 | 103.15749 | 0 down | #NAME? | 2.07E-19 | 2.97E-19 |
| TCONS_00035704 | 103.06538 | 0 down | #NAME? | 2.07E-19 | 2.97E-19 |
| TCONS_00000672 | 102.9997  | 0 down | #NAME? | 2.07E-19 | 2.97E-19 |
| TCONS_00067354 | 102.92401 | 0 down | #NAME? | 2.07E-19 | 2.97E-19 |
| TCONS_00018567 | 102.90559 | 0 down | #NAME? | 2.07E-19 | 2.97E-19 |
| TCONS_00049604 | 102.90559 | 0 down | #NAME? | 2.07E-19 | 2.97E-19 |
| TCONS_00071333 | 102.90559 | 0 down | #NAME? | 2.07E-19 | 2.97E-19 |
| TCONS_00010532 | 102.60732 | 0 down | #NAME? | 2.07E-19 | 2.97E-19 |
| TCONS_00078209 | 102.47509 | 0 down | #NAME? | 3.09E-19 | 4.42E-19 |
| TCONS_00093810 | 102.06298 | 0 down | #NAME? | 3.09E-19 | 4.42E-19 |
| TCONS_00044489 | 101.66883 | 0 down | #NAME? | 3.09E-19 | 4.42E-19 |

|                |           |        |        |          |          |
|----------------|-----------|--------|--------|----------|----------|
| TCONS_00002282 | 101.50004 | 0 down | #NAME? | 3.09E-19 | 4.42E-19 |
| TCONS_00037144 | 101.48946 | 0 down | #NAME? | 4.61E-19 | 6.53E-19 |
| TCONS_00024946 | 101.0856  | 0 down | #NAME? | 4.61E-19 | 6.53E-19 |
| TCONS_00008713 | 100.87798 | 0 down | #NAME? | 4.61E-19 | 6.53E-19 |
| TCONS_00030214 | 100.84892 | 0 down | #NAME? | 4.61E-19 | 6.53E-19 |
| TCONS_00057178 | 100.84892 | 0 down | #NAME? | 4.61E-19 | 6.53E-19 |
| TCONS_00085277 | 100.81505 | 0 down | #NAME? | 4.61E-19 | 6.53E-19 |
| TCONS_00071344 | 100.56683 | 0 down | #NAME? | 4.61E-19 | 6.53E-19 |
| TCONS_00060527 | 100.20246 | 0 down | #NAME? | 6.86E-19 | 9.71E-19 |
| TCONS_00007998 | 100.11178 | 0 down | #NAME? | 6.86E-19 | 9.71E-19 |
| TCONS_00071624 | 99.942191 | 0 down | #NAME? | 6.86E-19 | 9.71E-19 |
| TCONS_00092597 | 99.660822 | 0 down | #NAME? | 6.86E-19 | 9.71E-19 |
| TCONS_00038840 | 98.781493 | 0 down | #NAME? | 1.02E-18 | 1.44E-18 |
| TCONS_00094537 | 98.34567  | 0 down | #NAME? | 1.52E-18 | 2.13E-18 |
| TCONS_00097829 | 98.157509 | 0 down | #NAME? | 1.52E-18 | 2.13E-18 |
| TCONS_00060658 | 97.824772 | 0 down | #NAME? | 1.52E-18 | 2.13E-18 |
| TCONS_00008104 | 97.412009 | 0 down | #NAME? | 2.27E-18 | 3.16E-18 |
| TCONS_00045249 | 97.362711 | 0 down | #NAME? | 2.27E-18 | 3.16E-18 |
| TCONS_00055821 | 97.362711 | 0 down | #NAME? | 2.27E-18 | 3.16E-18 |
| TCONS_00072156 | 97.362711 | 0 down | #NAME? | 2.27E-18 | 3.16E-18 |
| TCONS_00090659 | 96.614421 | 0 down | #NAME? | 2.27E-18 | 3.16E-18 |
| TCONS_00033954 | 96.596846 | 0 down | #NAME? | 2.27E-18 | 3.16E-18 |
| TCONS_00046216 | 96.478118 | 0 down | #NAME? | 3.39E-18 | 4.64E-18 |
| TCONS_00053013 | 96.441645 | 0 down | #NAME? | 3.39E-18 | 4.64E-18 |
| TCONS_00059133 | 96.194359 | 0 down | #NAME? | 3.39E-18 | 4.64E-18 |
| TCONS_00032436 | 95.863794 | 0 down | #NAME? | 3.39E-18 | 4.64E-18 |
| TCONS_00041698 | 95.811114 | 0 down | #NAME? | 3.39E-18 | 4.64E-18 |
| TCONS_00021443 | 94.617402 | 0 down | #NAME? | 5.05E-18 | 6.86E-18 |
| TCONS_00020439 | 94.44537  | 0 down | #NAME? | 7.52E-18 | 1.02E-17 |
| TCONS_00015939 | 93.848155 | 0 down | #NAME? | 7.52E-18 | 1.02E-17 |
| TCONS_00100215 | 93.848155 | 0 down | #NAME? | 7.52E-18 | 1.02E-17 |
| TCONS_00007759 | 93.468203 | 0 down | #NAME? | 1.12E-17 | 1.51E-17 |
| TCONS_00078890 | 93.228013 | 0 down | #NAME? | 1.12E-17 | 1.51E-17 |
| TCONS_00004251 | 93.091315 | 0 down | #NAME? | 1.12E-17 | 1.51E-17 |
| TCONS_00084336 | 92.758846 | 0 down | #NAME? | 1.12E-17 | 1.51E-17 |
| TCONS_00091387 | 92.413794 | 0 down | #NAME? | 1.67E-17 | 2.25E-17 |
| TCONS_00073294 | 92.011995 | 0 down | #NAME? | 1.67E-17 | 2.25E-17 |
| TCONS_00035880 | 91.803745 | 0 down | #NAME? | 1.67E-17 | 2.25E-17 |
| TCONS_00076747 | 91.803745 | 0 down | #NAME? | 1.67E-17 | 2.25E-17 |
| TCONS_00038950 | 91.613675 | 0 down | #NAME? | 1.67E-17 | 2.25E-17 |
| TCONS_00058551 | 91.516832 | 0 down | #NAME? | 1.67E-17 | 2.25E-17 |
| TCONS_00056463 | 91.439505 | 0 down | #NAME? | 2.49E-17 | 3.34E-17 |
| TCONS_00077459 | 91.279319 | 0 down | #NAME? | 2.49E-17 | 3.34E-17 |
| TCONS_00066889 | 90.827292 | 0 down | #NAME? | 2.49E-17 | 3.34E-17 |
| TCONS_00028572 | 90.439141 | 0 down | #NAME? | 3.72E-17 | 4.95E-17 |
| TCONS_00061827 | 90.439141 | 0 down | #NAME? | 3.72E-17 | 4.95E-17 |
| TCONS_00062698 | 89.937815 | 0 down | #NAME? | 3.72E-17 | 4.95E-17 |
| TCONS_00035292 | 89.781402 | 0 down | #NAME? | 3.72E-17 | 4.95E-17 |
| TCONS_00083360 | 89.781402 | 0 down | #NAME? | 3.72E-17 | 4.95E-17 |

|                |           |        |        |          |          |
|----------------|-----------|--------|--------|----------|----------|
| TCONS_00070267 | 89.483124 | 0 down | #NAME? | 5.54E-17 | 7.37E-17 |
| TCONS_00049356 | 88.833841 | 0 down | #NAME? | 5.54E-17 | 7.37E-17 |
| TCONS_00051007 | 88.547109 | 0 down | #NAME? | 5.54E-17 | 7.37E-17 |
| TCONS_00079401 | 88.547109 | 0 down | #NAME? | 5.54E-17 | 7.37E-17 |
| TCONS_00032618 | 88.178162 | 0 down | #NAME? | 8.26E-17 | 1.09E-16 |
| TCONS_00037070 | 88.081582 | 0 down | #NAME? | 8.26E-17 | 1.09E-16 |
| TCONS_00101034 | 87.965343 | 0 down | #NAME? | 8.26E-17 | 1.09E-16 |
| TCONS_00068089 | 87.869847 | 0 down | #NAME? | 8.26E-17 | 1.09E-16 |
| TCONS_00046245 | 86.732619 | 0 down | #NAME? | 1.23E-16 | 1.62E-16 |
| TCONS_00049161 | 86.732619 | 0 down | #NAME? | 1.23E-16 | 1.62E-16 |
| TCONS_00056333 | 85.960916 | 0 down | #NAME? | 1.84E-16 | 2.41E-16 |
| TCONS_00072196 | 85.94685  | 0 down | #NAME? | 1.84E-16 | 2.41E-16 |
| TCONS_00007588 | 85.88782  | 0 down | #NAME? | 1.84E-16 | 2.41E-16 |
| TCONS_00028422 | 85.596675 | 0 down | #NAME? | 1.84E-16 | 2.41E-16 |
| TCONS_00053674 | 85.39447  | 0 down | #NAME? | 2.74E-16 | 3.57E-16 |
| TCONS_00041517 | 85.127751 | 0 down | #NAME? | 2.74E-16 | 3.57E-16 |
| TCONS_00024738 | 84.752739 | 0 down | #NAME? | 2.74E-16 | 3.57E-16 |
| TCONS_00042955 | 84.752739 | 0 down | #NAME? | 2.74E-16 | 3.57E-16 |
| TCONS_00002418 | 84.615408 | 0 down | #NAME? | 2.74E-16 | 3.57E-16 |
| TCONS_00097283 | 83.549091 | 0 down | #NAME? | 4.09E-16 | 5.32E-16 |
| TCONS_00040248 | 82.864054 | 0 down | #NAME? | 6.10E-16 | 7.90E-16 |
| TCONS_00080479 | 82.790227 | 0 down | #NAME? | 6.10E-16 | 7.90E-16 |
| TCONS_00078732 | 82.570265 | 0 down | #NAME? | 6.10E-16 | 7.90E-16 |
| TCONS_00024901 | 82.452308 | 0 down | #NAME? | 9.09E-16 | 1.17E-15 |
| TCONS_00063864 | 82.452308 | 0 down | #NAME? | 9.09E-16 | 1.17E-15 |
| TCONS_00057228 | 82.117136 | 0 down | #NAME? | 9.09E-16 | 1.17E-15 |
| TCONS_00070865 | 82.117136 | 0 down | #NAME? | 9.09E-16 | 1.17E-15 |
| TCONS_00054009 | 81.593429 | 0 down | #NAME? | 9.09E-16 | 1.17E-15 |
| TCONS_00026497 | 81.254091 | 0 down | #NAME? | 1.36E-15 | 1.74E-15 |
| TCONS_00002983 | 81.230792 | 0 down | #NAME? | 1.36E-15 | 1.74E-15 |
| TCONS_00050385 | 81.230792 | 0 down | #NAME? | 1.36E-15 | 1.74E-15 |
| TCONS_00011329 | 81.176674 | 0 down | #NAME? | 1.36E-15 | 1.74E-15 |
| TCONS_00018207 | 80.803261 | 0 down | #NAME? | 1.36E-15 | 1.74E-15 |
| TCONS_00056306 | 80.755758 | 0 down | #NAME? | 1.36E-15 | 1.74E-15 |
| TCONS_00089847 | 79.811913 | 0 down | #NAME? | 2.02E-15 | 2.59E-15 |
| TCONS_00086371 | 77.890169 | 0 down | #NAME? | 4.51E-15 | 5.74E-15 |
| TCONS_00086190 | 77.529782 | 0 down | #NAME? | 4.51E-15 | 5.74E-15 |
| TCONS_00038815 | 77.264545 | 0 down | #NAME? | 6.72E-15 | 8.51E-15 |
| TCONS_00083262 | 76.793816 | 0 down | #NAME? | 6.72E-15 | 8.51E-15 |
| TCONS_00003363 | 76.433502 | 0 down | #NAME? | 1.00E-14 | 1.27E-14 |
| TCONS_00041851 | 76.153867 | 0 down | #NAME? | 1.00E-14 | 1.27E-14 |
| TCONS_00073432 | 75.837876 | 0 down | #NAME? | 1.00E-14 | 1.27E-14 |
| TCONS_00063119 | 75.658484 | 0 down | #NAME? | 1.00E-14 | 1.27E-14 |
| TCONS_00077518 | 74.912421 | 0 down | #NAME? | 1.50E-14 | 1.88E-14 |
| TCONS_00085413 | 74.353128 | 0 down | #NAME? | 2.24E-14 | 2.80E-14 |
| TCONS_00087794 | 73.697291 | 0 down | #NAME? | 2.24E-14 | 2.80E-14 |
| TCONS_00017439 | 73.680785 | 0 down | #NAME? | 2.24E-14 | 2.80E-14 |
| TCONS_00039965 | 73.368579 | 0 down | #NAME? | 3.34E-14 | 4.17E-14 |
| TCONS_00037068 | 73.29094  | 0 down | #NAME? | 3.34E-14 | 4.17E-14 |

|                |           |        |        |          |          |
|----------------|-----------|--------|--------|----------|----------|
| TCONS_00004609 | 71.549523 | 0 down | #NAME? | 4.98E-14 | 6.20E-14 |
| TCONS_00034863 | 71.410659 | 0 down | #NAME? | 7.44E-14 | 9.23E-14 |
| TCONS_00039876 | 71.410659 | 0 down | #NAME? | 7.44E-14 | 9.23E-14 |
| TCONS_00097292 | 71.255081 | 0 down | #NAME? | 7.44E-14 | 9.23E-14 |
| TCONS_00048948 | 71.100178 | 0 down | #NAME? | 7.44E-14 | 9.23E-14 |
| TCONS_00097041 | 70.926716 | 0 down | #NAME? | 7.44E-14 | 9.23E-14 |
| TCONS_00075225 | 70.840807 | 0 down | #NAME? | 7.44E-14 | 9.23E-14 |
| TCONS_00035646 | 70.386116 | 0 down | #NAME? | 1.11E-13 | 1.37E-13 |
| TCONS_00101809 | 70.101152 | 0 down | #NAME? | 1.11E-13 | 1.37E-13 |
| TCONS_00077550 | 69.587408 | 0 down | #NAME? | 1.11E-13 | 1.37E-13 |
| TCONS_00015187 | 69.259938 | 0 down | #NAME? | 1.66E-13 | 2.04E-13 |
| TCONS_00090109 | 68.422766 | 0 down | #NAME? | 2.48E-13 | 3.04E-13 |
| TCONS_00010705 | 67.802191 | 0 down | #NAME? | 2.48E-13 | 3.04E-13 |
| TCONS_00083159 | 67.802191 | 0 down | #NAME? | 2.48E-13 | 3.04E-13 |
| TCONS_00005344 | 67.210032 | 0 down | #NAME? | 3.70E-13 | 4.52E-13 |
| TCONS_00067148 | 67.02066  | 0 down | #NAME? | 3.70E-13 | 4.52E-13 |
| TCONS_00074694 | 66.873084 | 0 down | #NAME? | 3.70E-13 | 4.52E-13 |
| TCONS_00040424 | 66.801638 | 0 down | #NAME? | 3.70E-13 | 4.52E-13 |
| TCONS_00048033 | 66.628127 | 0 down | #NAME? | 3.70E-13 | 4.52E-13 |
| TCONS_00010429 | 66.340937 | 0 down | #NAME? | 5.52E-13 | 6.73E-13 |
| TCONS_00073961 | 66.056212 | 0 down | #NAME? | 5.52E-13 | 6.73E-13 |
| TCONS_00039992 | 65.939681 | 0 down | #NAME? | 5.52E-13 | 6.73E-13 |
| TCONS_00093463 | 65.773921 | 0 down | #NAME? | 5.52E-13 | 6.73E-13 |
| TCONS_00003961 | 65.412164 | 0 down | #NAME? | 8.25E-13 | 1.00E-12 |
| TCONS_00022732 | 65.290289 | 0 down | #NAME? | 8.25E-13 | 1.00E-12 |
| TCONS_00026885 | 65.264609 | 0 down | #NAME? | 8.25E-13 | 1.00E-12 |
| TCONS_00069015 | 64.571084 | 0 down | #NAME? | 8.25E-13 | 1.00E-12 |
| TCONS_00057943 | 64.539346 | 0 down | #NAME? | 8.25E-13 | 1.00E-12 |
| TCONS_00000697 | 64.282626 | 0 down | #NAME? | 1.23E-12 | 1.49E-12 |
| TCONS_00083310 | 64.129573 | 0 down | #NAME? | 1.23E-12 | 1.49E-12 |
| TCONS_00048466 | 63.879066 | 0 down | #NAME? | 1.23E-12 | 1.49E-12 |
| TCONS_00057836 | 62.565437 | 0 down | #NAME? | 1.84E-12 | 2.23E-12 |
| TCONS_00100081 | 62.194629 | 0 down | #NAME? | 2.75E-12 | 3.32E-12 |
| TCONS_00024565 | 61.776194 | 0 down | #NAME? | 2.75E-12 | 3.32E-12 |
| TCONS_00058733 | 61.634829 | 0 down | #NAME? | 2.75E-12 | 3.32E-12 |
| TCONS_00006707 | 61.538479 | 0 down | #NAME? | 2.75E-12 | 3.32E-12 |
| TCONS_00050351 | 61.075783 | 0 down | #NAME? | 4.11E-12 | 4.94E-12 |
| TCONS_00091282 | 60.121474 | 0 down | #NAME? | 6.15E-12 | 7.37E-12 |
| TCONS_00097100 | 60.121474 | 0 down | #NAME? | 6.15E-12 | 7.37E-12 |
| TCONS_00008558 | 59.943072 | 0 down | #NAME? | 6.15E-12 | 7.37E-12 |
| TCONS_00059984 | 59.624603 | 0 down | #NAME? | 6.15E-12 | 7.37E-12 |
| TCONS_00046055 | 59.326917 | 0 down | #NAME? | 9.19E-12 | 1.10E-11 |
| TCONS_00077329 | 59.135876 | 0 down | #NAME? | 9.19E-12 | 1.10E-11 |
| TCONS_00004645 | 58.894505 | 0 down | #NAME? | 9.19E-12 | 1.10E-11 |
| TCONS_00016550 | 58.417627 | 0 down | #NAME? | 1.37E-11 | 1.64E-11 |
| TCONS_00005825 | 57.486669 | 0 down | #NAME? | 2.06E-11 | 2.44E-11 |
| TCONS_00083710 | 57.06445  | 0 down | #NAME? | 2.06E-11 | 2.44E-11 |
| TCONS_00024941 | 56.584917 | 0 down | #NAME? | 2.06E-11 | 2.44E-11 |
| TCONS_00076376 | 56.33003  | 0 down | #NAME? | 3.07E-11 | 3.64E-11 |

|                |           |        |        |          |          |
|----------------|-----------|--------|--------|----------|----------|
| TCONS_00075082 | 54.523118 | 0 down | #NAME? | 4.60E-11 | 5.43E-11 |
| TCONS_00086298 | 53.654224 | 0 down | #NAME? | 6.88E-11 | 8.10E-11 |
| TCONS_00063340 | 53.300304 | 0 down | #NAME? | 1.03E-10 | 1.21E-10 |
| TCONS_00013827 | 53.195037 | 0 down | #NAME? | 1.03E-10 | 1.21E-10 |
| TCONS_00095628 | 53.130605 | 0 down | #NAME? | 1.03E-10 | 1.21E-10 |
| TCONS_00066286 | 52.709238 | 0 down | #NAME? | 1.03E-10 | 1.21E-10 |
| TCONS_00020530 | 52.125022 | 0 down | #NAME? | 1.54E-10 | 1.80E-10 |
| TCONS_00010556 | 51.889073 | 0 down | #NAME? | 1.54E-10 | 1.80E-10 |
| TCONS_00087473 | 51.462003 | 0 down | #NAME? | 2.31E-10 | 2.68E-10 |
| TCONS_00093904 | 51.251093 | 0 down | #NAME? | 2.31E-10 | 2.68E-10 |
| TCONS_00022002 | 50.963899 | 0 down | #NAME? | 2.31E-10 | 2.68E-10 |
| TCONS_00059477 | 50.872017 | 0 down | #NAME? | 2.31E-10 | 2.68E-10 |
| TCONS_00067728 | 50.851643 | 0 down | #NAME? | 2.31E-10 | 2.68E-10 |
| TCONS_00002520 | 50.62861  | 0 down | #NAME? | 2.31E-10 | 2.68E-10 |
| TCONS_00001658 | 50.407524 | 0 down | #NAME? | 3.45E-10 | 4.01E-10 |
| TCONS_00065920 | 49.821779 | 0 down | #NAME? | 3.45E-10 | 4.01E-10 |
| TCONS_00028545 | 49.489059 | 0 down | #NAME? | 5.17E-10 | 5.99E-10 |
| TCONS_00039608 | 48.097179 | 0 down | #NAME? | 7.74E-10 | 8.93E-10 |
| TCONS_00021088 | 47.699682 | 0 down | #NAME? | 7.74E-10 | 8.93E-10 |
| TCONS_00006808 | 47.503387 | 0 down | #NAME? | 7.74E-10 | 8.93E-10 |
| TCONS_00071523 | 47.238301 | 0 down | #NAME? | 1.16E-09 | 1.33E-09 |
| TCONS_00099491 | 47.115604 | 0 down | #NAME? | 1.16E-09 | 1.33E-09 |
| TCONS_00021484 | 47.028353 | 0 down | #NAME? | 1.16E-09 | 1.33E-09 |
| TCONS_00080702 | 47.028353 | 0 down | #NAME? | 1.16E-09 | 1.33E-09 |
| TCONS_00063424 | 46.734101 | 0 down | #NAME? | 1.16E-09 | 1.33E-09 |
| TCONS_00017557 | 46.545657 | 0 down | #NAME? | 1.16E-09 | 1.33E-09 |
| TCONS_00024167 | 46.545657 | 0 down | #NAME? | 1.16E-09 | 1.33E-09 |
| TCONS_00095032 | 46.358727 | 0 down | #NAME? | 1.74E-09 | 1.99E-09 |
| TCONS_00051787 | 45.685975 | 0 down | #NAME? | 1.74E-09 | 1.99E-09 |
| TCONS_00034291 | 45.374698 | 0 down | #NAME? | 2.60E-09 | 2.97E-09 |
| TCONS_00082696 | 44.950635 | 0 down | #NAME? | 2.60E-09 | 2.97E-09 |
| TCONS_00088201 | 44.836354 | 0 down | #NAME? | 2.60E-09 | 2.97E-09 |
| TCONS_00002317 | 44.647171 | 0 down | #NAME? | 2.60E-09 | 2.97E-09 |
| TCONS_00077054 | 44.125853 | 0 down | #NAME? | 3.90E-09 | 4.45E-09 |
| TCONS_00038876 | 43.724709 | 0 down | #NAME? | 3.90E-09 | 4.45E-09 |
| TCONS_00017251 | 43.147865 | 0 down | #NAME? | 5.85E-09 | 6.65E-09 |
| TCONS_00065709 | 43.121609 | 0 down | #NAME? | 5.85E-09 | 6.65E-09 |
| TCONS_00038675 | 42.839593 | 0 down | #NAME? | 5.85E-09 | 6.65E-09 |
| TCONS_00036062 | 42.809008 | 0 down | #NAME? | 5.85E-09 | 6.65E-09 |
| TCONS_00080259 | 42.325518 | 0 down | #NAME? | 8.77E-09 | 9.96E-09 |
| TCONS_00095892 | 41.823634 | 0 down | #NAME? | 8.77E-09 | 9.96E-09 |
| TCONS_00017846 | 40.93377  | 0 down | #NAME? | 1.32E-08 | 1.49E-08 |
| TCONS_00078786 | 40.619499 | 0 down | #NAME? | 1.32E-08 | 1.49E-08 |
| TCONS_00046102 | 40.248686 | 0 down | #NAME? | 1.97E-08 | 2.23E-08 |
| TCONS_00035286 | 39.749735 | 0 down | #NAME? | 1.97E-08 | 2.23E-08 |
| TCONS_00084862 | 39.397007 | 0 down | #NAME? | 2.96E-08 | 3.34E-08 |
| TCONS_00071889 | 39.263004 | 0 down | #NAME? | 2.96E-08 | 3.34E-08 |
| TCONS_00047554 | 38.788048 | 0 down | #NAME? | 2.96E-08 | 3.34E-08 |
| TCONS_00035295 | 38.324446 | 0 down | #NAME? | 4.45E-08 | 5.00E-08 |

|                |           |        |        |          |           |
|----------------|-----------|--------|--------|----------|-----------|
| TCONS_00037865 | 38.324446 | 0 down | #NAME? | 4.45E-08 | 5.00E-08  |
| TCONS_00083421 | 38.324446 | 0 down | #NAME? | 4.45E-08 | 5.00E-08  |
| TCONS_00004153 | 37.316777 | 0 down | #NAME? | 6.68E-08 | 7.49E-08  |
| TCONS_00003170 | 36.684289 | 0 down | #NAME? | 6.68E-08 | 7.49E-08  |
| TCONS_00024341 | 34.355128 | 0 down | #NAME? | 2.27E-07 | 2.53E-07  |
| TCONS_00087483 | 33.170469 | 0 down | #NAME? | 3.41E-07 | 3.80E-07  |
| TCONS_00020537 | 32.571453 | 0 down | #NAME? | 3.41E-07 | 3.80E-07  |
| TCONS_00024566 | 32.064786 | 0 down | #NAME? | 5.12E-07 | 5.70E-07  |
| TCONS_00010817 | 31.156068 | 0 down | #NAME? | 7.71E-07 | 8.56E-07  |
| TCONS_00095457 | 30.747055 | 0 down | #NAME? | 7.71E-07 | 8.56E-07  |
| TCONS_00098159 | 30.700327 | 0 down | #NAME? | 7.71E-07 | 8.56E-07  |
| TCONS_00011607 | 30.178622 | 0 down | #NAME? | 1.16E-06 | 1.29E-06  |
| TCONS_00051499 | 27.882423 | 0 down | #NAME? | 2.64E-06 | 2.91E-06  |
| TCONS_00102022 | 27.596742 | 0 down | #NAME? | 2.64E-06 | 2.91E-06  |
| TCONS_00074401 | 26.720655 | 0 down | #NAME? | 3.98E-06 | 4.37E-06  |
| TCONS_00027914 | 24.956084 | 0 down | #NAME? | 9.06E-06 | 9.90E-06  |
| TCONS_00013486 | 24.414812 | 0 down | #NAME? | 1.37E-05 | 1.49E-05  |
| TCONS_00045601 | 23.013004 | 0 down | #NAME? | 2.07E-05 | 2.25E-05  |
| TCONS_00080055 | 22.501604 | 0 down | #NAME? | 2.07E-05 | 2.25E-05  |
| TCONS_00047606 | 22.062926 | 0 down | #NAME? | 3.13E-05 | 3.40E-05  |
| TCONS_00034689 | 21.862354 | 0 down | #NAME? | 3.13E-05 | 3.40E-05  |
| TCONS_00008085 | 21.376524 | 0 down | #NAME? | 4.74E-05 | 5.15E-05  |
| TCONS_00001197 | 21.219344 | 0 down | #NAME? | 4.74E-05 | 5.15E-05  |
| TCONS_00060022 | 20.466885 | 0 down | #NAME? | 7.19E-05 | 7.79E-05  |
| TCONS_00034101 | 19.631502 | 0 down | #NAME? | 7.19E-05 | 7.79E-05  |
| TCONS_00099285 | 18.498915 | 0 down | #NAME? | 0.000166 | 0.0001786 |
| TCONS_00003115 | 12.949241 | 0 down | #NAME? | 0.001371 | 0.0014584 |
| TCONS_00029585 | 12.860208 | 0 down | #NAME? | 0.001371 | 0.0014584 |
| TCONS_00102236 | 12.769163 | 0 down | #NAME? | 0.001371 | 0.0014584 |
| TCONS_00078347 | 12.657152 | 0 down | #NAME? | 0.001371 | 0.0014584 |
| TCONS_00066041 | 11.846596 | 0 down | #NAME? | 0.002105 | 0.0022332 |
| TCONS_00042097 | 9.5241939 | 0 down | #NAME? | 0.004998 | 0.0052739 |
| TCONS_00063050 | 9.5241939 | 0 down | #NAME? | 0.004998 | 0.0052739 |
| TCONS_00047350 | 9.4001002 | 0 down | #NAME? | 0.007743 | 0.0081183 |
| TCONS_00102427 | 9.3091315 | 0 down | #NAME? | 0.007743 | 0.0081183 |
| TCONS_00005696 | 9.2941409 | 0 down | #NAME? | 0.007743 | 0.0081183 |
| TCONS_00037930 | 9.2494576 | 0 down | #NAME? | 0.007743 | 0.0081183 |
| TCONS_00065265 | 8.7848729 | 0 down | #NAME? | 0.007743 | 0.0081183 |
| TCONS_00039963 | 8.6272968 | 0 down | #NAME? | 0.007743 | 0.0081183 |
| TCONS_00021717 | 8.2926171 | 0 down | #NAME? | 0.012046 | 0.0125246 |
| TCONS_00055362 | 8.2217401 | 0 down | #NAME? | 0.012046 | 0.0125246 |
| TCONS_00057135 | 7.9829343 | 0 down | #NAME? | 0.012046 | 0.0125246 |
| TCONS_00071379 | 7.9829343 | 0 down | #NAME? | 0.012046 | 0.0125246 |
| TCONS_00079986 | 7.6344729 | 0 down | #NAME? | 0.012046 | 0.0125246 |
| TCONS_00040712 | 7.5151843 | 0 down | #NAME? | 0.012046 | 0.0125246 |
| TCONS_00077666 | 7.0992147 | 0 down | #NAME? | 0.018843 | 0.0195539 |
| TCONS_00015865 | 7.021486  | 0 down | #NAME? | 0.018843 | 0.0195539 |
| TCONS_00035395 | 6.9959534 | 0 down | #NAME? | 0.018843 | 0.0195539 |
| TCONS_00037931 | 6.895653  | 0 down | #NAME? | 0.018843 | 0.0195539 |



|                |           |        |        |                    |
|----------------|-----------|--------|--------|--------------------|
| TCONS_00017787 | 5.6254011 | 0 down | #NAME? | 0.029675 0.0305913 |
| TCONS_00099239 | 5.6254011 | 0 down | #NAME? | 0.029675 0.0305913 |
| TCONS_00048344 | 5.5443434 | 0 down | #NAME? | 0.029675 0.0305913 |
| TCONS_00024465 | 5.2185005 | 0 down | #NAME? | 0.04715 0.0484717  |
| TCONS_00043662 | 5.062861  | 0 down | #NAME? | 0.04715 0.0484717  |
| TCONS_00098840 | 4.762097  | 0 down | #NAME? | 0.04715 0.0484717  |
| TCONS_00090165 | 4.6247288 | 0 down | #NAME? | 0.04715 0.0484717  |
| TCONS_00074902 | 4.5806838 | 0 down | #NAME? | 0.04715 0.0484717  |

---

**Table S4 Differential expressed lncRNAs for heatmap.**

| Transcript_id  | K1_fpkm     | K2_fpkm     | Regulation |
|----------------|-------------|-------------|------------|
| TCONS_00043826 | 187.9659884 | 2964.180937 | up         |
| TCONS_00073726 | 202.8588518 | 1244.042775 | up         |
| TCONS_00043824 | 147.9913212 | 1092.795071 | up         |
| TCONS_00032749 | 10.4181616  | 1092.120816 | up         |
| TCONS_00043825 | 120.8724927 | 980.1763233 | up         |
| TCONS_00055327 | 0           | 860.8756386 | up         |
| TCONS_00054751 | 0           | 845.7089079 | up         |
| TCONS_00096376 | 0           | 784.6239814 | up         |
| TCONS_00073113 | 0           | 756.2287528 | up         |
| TCONS_00098987 | 3519.305809 | 1460.143136 | down       |
| TCONS_00032817 | 2955.999062 | 1072.92607  | down       |
| TCONS_00014767 | 2517.16575  | 948.951436  | down       |
| TCONS_00102384 | 1980.318413 | 777.8374041 | down       |
| TCONS_00028528 | 1705.190269 | 540.8635519 | down       |
| TCONS_00071993 | 1664.446725 | 425.9992178 | down       |
| TCONS_00010172 | 2319.249103 | 389.2009418 | down       |
| TCONS_00032438 | 1778.295714 | 385.351225  | down       |
| TCONS_00042165 | 2200.838304 | 371.233793  | down       |
| TCONS_00021455 | 1645.429821 | 250.1402689 | down       |
| TCONS_00083478 | 1469.310175 | 207.8975989 | down       |
| TCONS_00054545 | 1621.129537 | 195.1084762 | down       |
| TCONS_00060509 | 2146.245995 | 158.8721349 | down       |
| TCONS_00102216 | 1476.213429 | 104.9083268 | down       |
| TCONS_00012765 | 1452.549639 | 82.1456152  | down       |
| TCONS_00017931 | 1522.062639 | 75.85431379 | down       |
| TCONS_00001110 | 1605.650199 | 69.91498198 | down       |
| TCONS_00007624 | 1706.275259 | 57.36982583 | down       |
| TCONS_00055883 | 1734.413439 | 0           | down       |
| TCONS_00093418 | 1623.279804 | 0           | down       |
| TCONS_00041247 | 1440.719163 | 0           | down       |
| TCONS_00069775 | 1432.491844 | 0           | down       |
| TCONS_00037294 | 1370.612432 | 0           | down       |
| TCONS_00037294 | 1370.612432 | 0           | down       |
